# Supplementary material for: Role of APOBEC3 in Genetic Diversity among Endogenous Murine Leukemia Viruses
Source: PLoS Genet. 2007 Oct 26;3(10):e183. doi: 10.1371/journal.pgen.0030183 (PMC2041998; doi:10.1371/journal.pgen.0030183)
Supplement: Figure S1 — (215 KB PDF) [file pgen.0030183.sg001.pdf]

>Mpmv1

TGAAAGACCCCACCATAAGGCTTAGCAAGCTAGCTGCAGTAACGCCATTTTGTCAAGGCATGAAAAAGTACCAGAGCTGGG  
TTCTCAAAAGTTACAAGGAAGTTTCAGTTATAGATTAACAGTTAAAGATCAAGGCTGAATAGCACTGGGACAGGGGCCGAA  
CAGGATATCGGTGGTCAAGCACCTGGGCCCCGGCTCAGGGCCAAGAACAGATGGTTCTCAGATAAAGCGGAACCAGCAAC  
AGACACAGAAGCCCCGATAGACGTCAGTGTTAGCAGAACTAGCTTCACTGATTTAGAAAAATAGAGGTGCACAGTGCTCT  
GGTCACTCCTTGAACCTGTGTGTCTGCCAATGTTCTGACCAGATATGTGCCCATTTGCTGAACCTTCATTAGACTCTTTCC  
TTGTACCCCTCCCCTACCCATTTCTTGAAAATAGACATTGTTTAGATCTAAAAAGTCCCACCTCAGTTTCCCCAAATGAC  
CGGGAAGTACCCCAAACCTTATTGAACTAACCAACCAGCTCGCTTCTCGCTTCTGTAACCGCGCTTTTTGCTCCCCAGC  
CCTAGCCCTATAAAAAGGGTAAAAACTCCACACTCGGCGCGCCAGTCCCTCCGATAGACTGAGTCGCCCCGGGTACCCGTGT  
TCCCAATAAAGCCTCTTGCTGTTTACATCCGAATCGTGGACTCGCTGATCCTTGGGAGGGTCTCCTCAGATTGATTGACT  
GCCCCACTGGGGGGTCTTTTCATTTGGAGGGCCCCAGCGAGATCAGGAGACCCCTGCCAGGGACCACCGACCCCCGCCGGG  
AGGTAAGCTGGCCAGCGGTGTTTTGTGTCTGTCTCTGTCTCCGTGCGTGTTTTGTGCCGGCATCTAATGTTTGCGCCTGC  
GTCTGTACTAGTTGGCTAACTAGATCTGTATCTGGCGGTTCCGCGGAAGAAGTACGAGTTCGTATTTCCCGCCCGCAGCC  
CCTGGGAGACGTCCCAGCGGCTCGGGGGCCCGTTTTGTGGCCCATTTCTGTATCAGTTAACCTACCCGAGTCGGACTTTTT  
TGGAGCTCCGCCACTGTACGTGGCTTTGTTGGGGGACGAGAGACAGAGACACTTCCCGCCCCCGTCTGGATTTTTGTCTTT  
CGGTTTTTACGCCGAAACCGCGCTGCGCGTCTGATTTGTTTTATTGCTCTTTTGTTCCTTCTGTTAGTTTTTCTGTCTTTAA  
GTGTTTTCAAGATCATGGGACAGACCGTAACCTACCCCTCTGAGTCTAACCTTGCAGCACTGGGGAGATGTCCAGCGCATT  
GCATCCAACCAAGTCTGTGGATGTGAGGAAGAGGCGCTGGATTACCTTCTGTTCCGCCGAATGGCCAACCTTCAATGTAGG  
ATGGCCTCAGGATGGTACTTTCAATTTAAGTATTATCTCTCAGGTTAAGTCTAGAGTGTTTTGTCTGGTCCCCACGGAC  
ACCCGGATCAGGTCCCATATATCGTTACCTGGGAGGCACTTGCCTATGACCCCCCTCCGTGGGTCAAACCGTTTTGTTTCT  
CCTAAACCTCCTCCCTTGCCGACAGCTCCCGTCTCCCGCCCGGTCTTCTGCGCAACCTCCGTCCCGATCTGCCCTTTA  
CCCTGCCCTTACCCCTCTATAAAGTCCAAACCTCCTAAGCCCCAGGTTCTCCCTGATAGCGGCGGACCTCTCATTGACC  
TTCTCACAGAGGACCCCCCGCCGTACGGAGCACAACTTCTCCTCTGCCAGAGAGAAGCATGAAGAAGAGGCGGCCACC  
ACCTCCGAGGTTTTCCCCCTTCTCCCATGGCGTCTCGACTGCGGGGAAGGAGAGACCCTCCCGCAGCGGACTCCACCTC  
CTCCCAGGCATTCCCCTCCGTATGGGGGAGATGGCCAGCTTCAGTACTGGCCGTTTTCTCCTCTGACTTATATAATT  
GGAAAAATAATAACCTTCTTTTTCTGAAGATCCAGGTAAATTGACGGCCTTGATTGAGTCCGTCTCATCACCCACCAG  
CCCACCTGGGACGACTGTAGCAGTTGTTGGGACCTTGTGACCGGAGAAAGAGCAGCGGGTGCTCTCAGAGCTTAG  
AAAGGCGATCCGGGGCAATGAGACGCCCCACTCAGTTGCCTAATGAAATCAATGCTGCCTTTCCCCCTTGAGCGCCCTG  
ATTGGGATTACACCACTACAGAAGGTAGGAACCACTAGTCTCTATCGCCAGTTGCTCTTAGCGGGTCTCCAAAACGCG  
GGCAGAAGCCCCACCAATTTGGCCAAGGTAAAAGGGATAACCCAGGGACCTAATGAGTCTCCCTCAGCCTTTTTAGAGAG  
ACTCAAGGAGGCTATCGCAGGTACACTCCTTATGACCCTGAGGACCCAGGGCAAGAAACCAATGTGTCTATGTCATTCA  
TCTGGCAGTCTGCCCCGATATCGGGCGAAAGTTAGAGCGGTTAGAAGATTTAAAGAGCAAGACCTTAGGAGACTTAGTG  
AGGGAAGCTGAAAAGATCTTTAATAAACGAGAAACCCCGGAAGAAAGAGAGGAACGTATCAGGAGAGAAACAGAGGAAAA  
AGAAGAACGCCGTAGGGCAGAGGATGAGCAGAAAGAGAAAGAAAGGGACCGCAGAAGACATAGAGAGATGAGCAAGCTCT  
TGGCCACTGTAGTTATTGGTCAGAGACAGGATAGACAGGGGGGAGAGCGGAAGAGGCCCCAACTTGATAAGGATCAATGC  
GCCTACTGCAAAGAAAGGGACACTGGGCTAAAGACTGCCCAAAGAAGCCACGAGGGCCCCGAGGACCGAGGCCCCAGAC  
CTCCCTCCTGACCTTAGGTGACTAGGGAGGTGAGGTGAGGAGCCCCCCCCCTGAACCCAGGATAACCCCTCAAAGTCGGGG  
GGCAACCCGTACCTTCTGGTAGATACTGGGGCCCAACACTCCGTGCTGACCCAAAATCTTGACCCCTAAGTGACAAG  
TCTGCCTGGGTCCAAGGGGCTACTGGAGGAAAGCGGTATCGCTGGACCACGGATCGCAAAGTGCATCTAGCTACCGGTAA  
GGTCACCCACTCTTTCTCCATGTACCAGACTGCCCCCTATCCTCTGCTAGGAAGAGATTTGCTGACTAAACTAAAAGCCC  
AAATCCACTTTGAGGGATCAGGAGCTCAGGTTATGGGACCAATGGGACAGCCCCCTGCAAGTGCTGACCCCTAAACATAGAA  
GATGAGTATCGGCTACATGAGACCCCAAAGAGCCGGATGTTTCTCTAGGGTCCACATGGCTTTCTGATTTTCCCCAGGC  
CTGGGCGGAAACCGGGGGCATGGGACTGGCAGTTCGCCAAGCTCCTCTGATCATACCTCTGAAGGCAACCTCTACCCCG  
TGTCATATAAAACAATAACCCATGTACAAAGAAGCCAGACTGGGGATCAAGTCCCACATACAGAGACTGTTGGACCAGGGA  
ATACTGGTACCTTGCCAGTCCCCCTGGAACACGCCCCCTGCTACCCGTTAAGAAACAGGGACTAATGATTACAGGCCTGT  
CCAAGATCTGAGAGAAGTCAACAAGCGGGTGAAGACATCCACCCACCGTGCCCAACCTTACAACCTCTTGAGCGGGC  
TCCCACCGTCCCACCAAGTGGTACACTGTGCTTGACTTAAAGGATGCCTTTTTCTGCCTGAGACTCCACCCACCAAGTCAG  
CCTCTCTTTCGCTTTGAGTGGAGAGACCCAGAGATGGGAATCTCAGGACAATTAACCTGGACCAGACTCCCACAGGGTTT  
CAAAAACAGTCCCACCTGTTTGATGAGGCACTGCACAGAGACCTAGCAGGCTTCCGGATCCAGCACCCAGACTTGATCC  
TGCTACAGTACGTGGATGATTTACTGCTGGCCGCCACTTCTGAGCTCGACTGCCAACAAGGTACTCGGGCCCTGTTACAA  
ACCCTAGGGGACCTCGGGTATCGGGCCTCGGCCAAGAAAGCCCAAATTTGCCAGAAACAGGTCAAGTATCTGGGGTATCT  
TCTAAAAGAGGGTCAGAGATGGCTGACTGAGGCCAGAAAAGAGACTGTGATGGGGCAGCCTATTCCGAAGACCCCTCGAC  
AACTAAGGGAGTTCTAGGGACGGCAGGCTTCTGTGCTCTGGATCCCTGGGTTTGAGAAATGGCCGCCCCCTTGTAC  
CCTCTCACAAAACGGGGACTCTGTTTAATTGGGGCCAGACCAGCAAAGGCCTATCAAGAAATCAAACAGGCTCTTCT  
AACTGCCCCAGCCCTGGGGTTGCCAGATTTGACTAAGCCCTTTGAACTCTTTGTGACGAGAAGCAGGGCTACGCCAAAG  
GCGTCTTAACGCAAAAAGTGGGACCTTGGCGTGGCCGGTGGCCTACCTGTCCAAAAGCTAGACCCAGTGGCAGCTGGG  
TGGCCCCCTTGCCCTACGGATGGTAGCAGCCATTGCCGTTCTGACAAAGGATGCAGGCAAGCTAACTATGGGACAGCCGCT

AGTCATTCTGGCCCCCATGCGGTAGAAGCACTGGTCAAACAACCCCCCTGACCGCTGGCTATCCAATGCTCGCATGACCC  
ACTATCAGGCAATGCTCCTAGATACGGACCGAGTTTCACTTCGGACCGGTGGTAGCCTTAAACCCGGCCACGTTGCTCCCC  
TTGCCGGGAAAAGAGACCCCCACGACTGCCTCGAGATCTTGGCTGAGACACACGGCACCAGACCGGACCTCACGGACCA  
GCCCCCTCCCAAATGCCGACCACACCTGGTATACAGATGGAAGCAGCTTCCTGCAGGAGGGGCAACGTAAGGCTGGAGCAG  
CGGTGACCACCGAGACCGAGGTAATCTGGGCCAAGGCGTTGCCAGTCGGGACATCCGCCCAGCGAGCTGAACTAATAGCA  
CTCACCAGGCCCTAAAGATGGCAGAAGGTAAGAAGCTAAATGTTTATACTGATAGCCGCTATGCCTTTGCTACCGCCCCA  
TGTCCATGGAGAAATATATAGGAGACGTGGGTGCTCACCTCAGAAGGCAAGGAGATCAAGAACAAGGGCGAAATCTTGG  
CCTTACTGAAAGCTCTCTTTCTGCCCCAAAAGACTCAGTATAATTCACTGCCCAGGACATCAGAAAGGCAATAGTGCTGAA  
GCTAAAGGCAACCGAATGGCGGACCAGGCAGCCCGGAAGCAGCCATGGGGACTGACACAAAGGCCTCCTCACTTCTCAT  
AGAGACCTCAACCCCGTACACTCCAGACTTCTTCCATTATACTGAAACAGATATAAAGAACCTACGAGAGTTGGGAGCCA  
CATATGATAGAGAGAAAAAATATTGGGTCTGCAAGGTAAACCTGTGATGCCTGACCAGTTACCTTTGAATTATTAGAC  
TTCCTTCACCAGCTCACCACCTTAGCTATCAGAAGATGAGGGCACTTCTAGACAGAAAAGAAAGCCCTTATTACATGCT  
AAATAAAGATAAGATCCTCCACGAGGTGGCGGAATCATGCCAAGCCTGTGTCCAAGTAAATGCCAGTAAAGCTAAGGTGCG  
GTCCCGGGGTGCGAGTAAGAGGACATCGACCAGGCACCCATTGGGAAATTGACTTTACTGAAGTAAGGCCCGGACTGTAT  
GGGCATAAGTATCTTCTGGTGTGTTGTGGACACGTTCTCTGGCTGGGTGGAAGCCTTCCCAACCAAGCATGAGACTGCCAA  
AGTTGTGACCAAAAAGCTTCTAGAAGAAATATTTCCAAGGTTTGGAAATGCCCAAGTATTGGGGACTGATAATGGGCCTG  
CCTTCGTCTCCAGGTAAGTCAGTCGGTGGCCAAGCTACTGGGGATTGATTGGAACTACATTGTGCTTACAGACCCAG  
AGTTCAGGTGAGGTAGAAAGAATGAATAGGACAATCAAGGAGACTTTGACCAAATTAACGCTTGCAACTGGCACTAGAGA  
CTGGGTACTCCTACTTCCCTTGGCCCTCTACCGAGCCCGCAACACTCCGGGCCCCCATGGACTCACTCCGTATGAAATCC  
TGTATGGGGCGCCCCCGCCCTTGTTAATTTCCATGATCCTGAAATGTCAAAGTTTACTAATAGCCCCCTCTCTCCAAGCT  
CACTTACAGGCCCTCCAAGCAGTACAACGAGAGGTCTGGAAGCCTCTGGCCGCTGCCTATCAGGACCAACAAGACCAGCC  
TGTGATACCACACCCCTTCCGTGTGCGCGACACCGTGTGGGTACGCCGGCACCAGACTAAGAAGTTGGAACCTCGCTGGA  
AAGGACCCTACACCGTCTGTGACCACCCCCACCGCTCTCAAAGTAGACGGCATCGCTGCGTGGATCCACGCCGCTCAC  
GTAAAAGCGGCGACAACCCCTCCGGCCGGAACAGCATCAGGACCGACATGGAAGGTCCAGCGTTCTCAAAACCCCTTAAA  
GATAAGATTAACCCGTGGGCCCCCTGATAGTCCTGGGGATCTTAATAAGGGCAGGAGTATCAGTACCACATGACAGCCC  
TCATCAGGTCTTCAATGTTACTTGGAGAGTTACCAACTTAATGACAGGACAAACAGCTAATGCTACCTCCCTCCTGGGGA  
CAATGACCGATGCGCTTTCCCAAAGTGTACTTTGACTTGTGCGATTGTAATAGGGGACGACTGGGATGAGACTGGACTCGGG  
TGTGCGACTCCCGGGGGAAGAAAAGGGCAAGAACATTTGACTTCTATGTTTGGCCCGGGCAGTACTGTACCAACAGGGTG  
TGGAGGCCCCGAGAGAGGGCTACTGTGGCAAATGGGGCTGTGAGACCCTGGACAGGCATACTGGAAGCCATCATCATCAT  
GGGACCTAATTTCCCTTAAGCGAGGAAACACCCCTCGGAATCAGGGCCCCCTGTTATGATTCTCAGCGGTCTCCAGTGGC  
ATCCAGGGTGCCACACCGGGGGGTGATGCAATCCCTAGTCCTAGAATTCAGTGACGCGGGTAAAAAGGCCAGCTGGGA  
TGGCCCCAAAGTATGGGGACTAAGACTGTACCGATCCACAGGAACCGACCCGGTGACCCGGTTCTCTTTGACCCGCCAGG  
TCCTCAATATAGGGCCCCGCATCCCCATTGGGCCTAATCCCGTGATCACTGACCAGTTACCCCCCTCCCGACCCGTGCAG  
ATCATGCTCCCCAGGCCTCCTCAGCCTTCCCCTACAGGCGCAGCCTCTATACAACCTGGGACGGGAGACAGACTGCTGAA  
CCTGGTAGATGGAGCCTACCAAGCACTCAACCTCACCAGTCCTGACAAAACCAAGAGTGCTGGTTGTGTCTGGTATCGG  
GACCCCCCTATTACGAAGGGGTTGCCGTCTAGGTACCTACTCCAACCATACTCTGCCCCAGCTAACTGCTCCGTGGCC  
TCCCAACACAAGCTGACCCTGTCCGAAGTAACCGGACAGGGACTCTGCGTAGGAGCAGTTCCCAAAACCCATCAGGCCCT  
GTGTAATACCACCCAGAATACAAGCGACGGGTCTACTATCTGGCTGCTCCCGCCGGGACCATTTGGGCTTGCAACACCG  
GGCTCACTCCCTGCCTATCTACTACTGTACTCAACCTCACCACCGATTACTGTGTCCTGGTTGAGCTCTGGCCAAAGGTG  
ACCTACCACTCCCCTGGTTATGTTTATGGCCAGTTTGAGAGAAAAACCAATATAAAAGAGAGCCGGTGTCAATTAACCTCT  
GGCCCTGCTGTTGGGAGGACTTACTATGGGCGGCATAGCTGCAGGAGTAGGAACAGGGACTACAGCCCTAGTGGCCACCA  
AGCAATTCGAGCAGCTCCAGGCAGCCATACATACAGACCTTGGGGCCTTAAAAAATCAGTCAGTGCCCTAGAAAAGTCT  
CTGACCTCGTTGTCTGAGGTGGTCCTACAGAACCGGAGAGGATTAGATCTACTGTTCTAAAAGAAGGAGGATTATGTGC  
TGCCCTAAAAGAAGAATGCTGTTTCTACGCGGACCACACTGGCGTAGTGAGAGATAGCATGGCAAAGCTAAGAGAAAGGT  
TAAACCAGAGACAAAAATTGTTGCAATCAGGACAAGGGTGGTTTGAGGGACTGTTTAACAGGTCCCCATGGTTACGACC  
TTAATATCCACATTATGGGCCCCCTTGATAATACTCTTATTAATCCTACTCTTCGGACCCCTGTATTCTCAACCGCTTGGT  
CCAGTTTGTAAGAAGACAGAATTTTCGGTGGTGACGGCCCTGGTTCTGACCCAACAGTATCACCACCTCAAATCAATAGGTC  
CAGAAGAAGTGAAATCACGTGAATAAAAGATTTTATTTCAGTTTCCATAAAGAGGGGGGAATGAAAGACCCCAACATAAGG  
CTTAGCAAGCTAGCTGCAGTAACGCCATTTTGAAGGCATGAAAAAGTACCAGAGCTGGGTTCTCAAAAGTTACAAGGAA  
GTTTCAGTTATAGATTAACAGTTAAAGATCAAGGCTGAATAGCACTGGGACAGGGGCCGAACAGGATATCGGTGGTCAAGC  
ACCTGGGCCCCGGCTCAGGGCCAAGAACAGATGGTTCTCAGATAAAGCGGAACCAGCAACAGACACAGAAGCCCCGATAG  
ACGTCAGTGTTAGCAGAACTAGCTTCACTGATTTAGAAAAATAGAGGTGCACAGTGCTCTGGTCACTCCTTGAACCTGTG  
TGTCTGCCAATGTTCTGACCAGATATGTGCCATTGCTGAACCTTCATTAGACTCTTTCCTTGTACCCCTCCCCTACCCA  
TTTCTTGAAAATAGACATTGTTTAGATCTAAAAAGTCCCACCTCAGTTTCCCAAAATGACCGGGAAGTACCCCAACCTT  
ATTGCAACTAACCAACCAGCTCGCTTCTCGCTTCTGTAACCGCGCTTTTTGCTCCCCAGCCCTAGCCCTATAAAAAGGGT  
AAAAACTCCACACTCGGCGCGCCAGTCCTCCGATAGACTGAGTCGCCCCGGGTACCCGTGTTCCCAATAAAGCCTCTTGCT

GTTTACATCCGAATCGTGGACTCGCTGATCCTTGGGAGGGTCTCCTCAGATTGATTGACTGCCCACCTGGGGGGTCTTTCA  
A

>Mpmv10

TGAAAGACCCCACCATAAGGCTTAGCAAGCTAGCTGCAGTAACGCCATTTTTTGCAAGGCATGAAAAAGTACCAGAGCTGG  
GTTCTCAAAAGTTACAAGGAAGTTCAGTTATAGATTAACAGTTAAAGATCAAGGCTGAATAGCACTGGGACAGGGGCCGA  
ACAGGATATCGGTGATCAAGCACCTGGGCCCCGGCTCAGGGCCAAGAACAGATGGTTCTCAGATAAAGCGGAACCAGCAA  
CAGACACAGAAGCCCCGATAGACGTCAGTGTTAGCAGAACTAGCTTCACTGATTTAGAAAAATAGAGGTGCACAGTGCTC  
TGGTCACTCCTTGAACCTGTGTGTCTGCCAATGTTCTGACCAGATATGTGCCCATTTGCTGAACCTTCATTAGACTCTTTC  
CTTGATCCCCTCCCCTACCCATTTCTTGAATAAGACATTGTTTAGATCTAAAAAGTCCCACCTCAGTTTCCCCAAATGA  
CCGGGAAGTACCCCAAACCTTATTGAACTAACCAACCAGCTCGCTTCTCGCTTCTGTAACCGCGCTTTTTGTCTCCCCAG  
CCCTAGCCCTATAAAAAGGGTAAAACTCCACACTCGGCGCGCCAGTCTCCGATAGACTGAGTCGCCCCGGGTACCCGTG  
TTCCCAATAAAGCCTCTTGCTGTTTACATCCGAATCGTGGACTCGCTGATCCTTGGGAGGGTCTCCTCAGATTGATTGAC  
TGCCCCACCTGGGGGGTCTTTCATTTTGGAGGCCCCAGCGAGATCAGGAGACCCCTGCCAGGGACCACCGACCCCCGCCG  
GGAGGTAAGCTGGCCAGCGGTCTGTTTCTGTGTCTGTCTCTGTCTCCGTGCGTGTTTGTAGCCGGCATCTAATGTTTGC  
GCGTCTGTACTAGTTGGCTAACTAGATCTGTATCTGGCGGTTCCGCGGAAGAACTGACGAGTTCGTATTCGCGCCGCGAG  
CCCCTGGGAGACGTCCCAGCGGCTCGGGGGCCCGTTTTGTGGCCATTCTGTATCAGTTAACCTACCCGAGTCGGACTT  
TTTGGAGCTCCGCCACTGTACGTGGCTTTGTTGGGGGACGAGAGACAGAGACACTTCCCGCCCCCGTCTGGATTTTTGTCT  
TTCGGTTTTACGCCGAAACCGCGCTGCGCGTCTGATTTGTTTTATTGCTCTTTTGTCTTCTCGTTAGTTTTTCTGTCTTT  
AAGTGTTCATAGATCATGGGACAGACCGTAACCTACCCCTCTGAGTCTAACCTTGACGACTGGGGAGATGTCCAGCGCA  
TTGCATCCAACCACTGTGTGGATGTGAGGAAGAGGCGCTGGATTACCTTCTGTTCCGCCGAATGGCCAACTTTCAATGTA  
GGATGGCCTCAGGATGGTACTTTCAATTTAAGTATTATCTCTCAGGTTAAGTCTAGAGTGTTTTGTCTGGTCCCCACGG  
ACACCCGGATCAGGTCCCATATATCGTTACCTGGGAGGCACTTGCCTATGACCCCCCTCCGTGGGTCAAACCGTTTGT  
CTCCTAAACCTCCTCCCTTGCCGACAGCTCCCGTCTCCCGCCCGGTCTTCTGCGCAACCTCCGTCCCGATCTGCCCTT  
TACCCTGCCCTTACCCCTCTATAAAGTCCAAACCTCCTAAGCCCCAGGTTCTCCCTGATAGCGGCGGACCTCTCATTGA  
CCTTCTCACAGAGGACCCCCCGCGGTACGGAGCACAACTTCTCCTCTGCCAGAGAGAACGATGAAGAAGAGGCGGCCA  
CCACCTCCGAGGTTTTCCCCCTTCTCCATGGCGTCTCGACTGCGGGGAAGGAGAGACCCTCCCGCAGCGGACTCCACC  
TCCTCCAGGCACTCCCACTCCGTATGGGGGAGATGGCCAGCTTCACTAGCTGGCCGTTTTCTCTCTGACTATATATAA  
TTGAAAAATAAATCAACCTTCTTTTTCTGAAGATCCAGGTAATTTGACGGCCTTGATTGAGTCGCTCCTCATCACCCACC  
AGCCCACTGGGACGACTGTGACGAGTTGTTGGGGACCCTGCTGACCGGAGAAGAAAAGCAGCGGGTCTCCTAGAGGCT  
AGAAAGGCAGTCCGGGGCAATGATGGACGCCCCACTCAGTTGCCTAATGAAATCAATGCTGCCTTTCCCTTGAGCGCCC  
TGATTGGGATTACACCACTACAGAAGGTAGGAACCACCTAGTCCTCTATCGCCAGTTGCTCTTAGCGGGTCTCCAAAACG  
CGGGCAGAAGCCCCACCAATTTGGCCAAGGTAAAAGGGATAACCCAGGGACCTAATGAGTCTCCCTCAGCCTTTTTAGAG  
AGACTCAAGGAGGCCTATCGCAGGTACACTCCTTATGACCCTGAGGACCCAGGGCAAGAAACCAATGTGTCTATGTCATT  
CATCTGGCAGTCTGCCCCGATATCGGGCGAAAGTTAGAGCGGTTAGAAGATTTAAAGAGCAAGACCTTAGGAGACTTAG  
TGAGGGAAGCTGAAAAGATCTTTAATAAACGAGAAACCCGGAAGAAAGAGAGGAACGTATCAGGAGAGAAACAGAGGAA  
AAAGAAGAAGCCGTAGGGCAGAGGATGAGCAGAAAGAGAAAGAAAGGGACCGCAGAAGACATAGAGAGATGAGCAAGCT  
CTTGGCCACTGTAGTTATTGGTCAGAGACAGGATAGACAGGGGGGAGAGCGGAAGAGGCCCAACTTGATAAGGATCAAT  
GCGCCTACTGCAAGAAAAGGGACACTGGGCTAAAGACTGCCCAAAGAAGCCACGAGGGCCCCGAGGACCGAGGCCCCAG  
ACCTCCCTCCTGACCTTAGGTGACTAGGGAGGTGAGGGTACAGGAGCCCCCCCCCTGAACCCAGGATAACCTCAAAGTCGG  
GGGGCAACCCGTCACCTTCTGGTAGATACTGGGGCCCAACACTCCGTGCTGACCCAAAATCCTGGACCCCTAAGTGACA  
AGTCTGCCTGGGTCCAAGGGGCTACTGGAGGAAAGCGGTATCGCTGGACCACGGATCGCAAAGTGCATCTAGCTACCGGT  
AAGGTCACCCACTCCTTCTCCATGTACCAGACTGCCCCATCCTCTGCTAGGAAGAGATTTGCTGACTAAACTAAAAGC  
CCAAATCCACTTTGAGGGATCAGGAGCTCAGGTTGTGGGACCAATGGGACAGCCTCTGCAAGTGCTGACCCTAAACATAG  
AAGATGAGTATCGGCTACATGAGACCTCAAAGAGCCGGATGTTTCTCTAGGGTCCACATGGCTTTCTGATTTTCCCCAG  
GCCTGGGCGGAAACCGGGGGCATGGGACTGGCAGTTCGCCAAGCTCCTCTGATCATACCTCTGAAGGCAACCTCTACCCC  
CGTGTCCATAAAATACGAGACCGAGTTCAGTTCGGACCGGTGGTAGCCTTAAACCCGGCCACGTTGCTCCCCTTGCCGGGA  
AAAGAGACCCCCACGACTGCCTCGAGATCCTGGCTGAGACACACGGCACAGACCGGACCTCACGGACACGCCCCCTCCC  
AAATGCCGACCACACCTGGTATACAGATGGAAGCAGCTTCTGACAGGAGGGGCAACGTAAGGCTGGAGCAGCGGTGACCA  
CCGAGACCGAGGTAATCTGGGCCAAGGCGTTGCCAGCCGGGACATCCGCCAGCGAGCTGAACTAATAGCACTACCCAG  
GCCCTAAAGATGGCAGAAGGTAAGAAGCTAAATGTTTATACTGATAGCCGCTATGCCTTTGCTACCGCCCATGTCCATGG  
AGAAATATATAGGAGACGTGGGTTGCTCACCTCAGAAGGCAAGGAGATCAAGAACAAGGGCGAAATCTTGGCCTTACTGA  
AAGCTCTCTTTCTGCCCAAAGACTCAGTATAATTCAGTCCCAGGACATCAGAAAGGCAATAGTGCTGAAGCTAAAGGC  
AACCGAATGGCGGACCAGGCAGCCCGGGAAGCAGCCATGGGGACTGACACAAAGGCCTCCTCACTTCTCATAGAGACCTC  
AACCCCGTACACTCCAGACTTCTTCCATTATACTGAAACAGATATAAAGAACCTACGAGAGTTGGGAGCCACATATGATA  
GAGAGAAAAAATATTGGGTCTGCAAGGCAAACCTGTGATGCCTGACCAGTTCACCTTTGAATTATTAGACTTCTTTCAC  
CAGCTCACCCACCTTAGCTATCAGAAGATGAGGGCACTTCTAGACAAAAAAGAAAGCCCCCTATTACATGCTAAATAAAAA  
TAAGATCCTCCACGAGGTGGCGGAATCATGCCAAGCCTGTGTCCAAGTAAATGCCAGTAAAGCTAAGGTCGGTCCCCGGG

TGCGAGTAAGAGGACATCGACCAGGCACCCATTGGGAAATTGACTTTACTGAAGTAAGGCCCCGACTGTATGGGCATAAG  
TATCTTCTGGTGTGTTGTGGACACGTTCTCTGGCTGGGTGGAAGCCTTCCCAACCAAGCATGAGATTGCCAAAGTTGTGAC  
CAAAAAGCTTCTAGAAGAAATATTTCCAAGGTTTGGAATGCCCCAAGTATTGGGGACTGATAATGGGCCTGCCTTCGTCT  
CCCAGGTAAGTCAGTCGGTGGCCAAGCTACTGGGGATTGATTAGAACTACATTGTGCTTACAGACCCCAGAGTTCAGGT  
CAGGTAAGAAAGAATGAATAGGACAATCAAGGAGACTTTGACCAAATTAACGCTTGCAACTGGCACTAGAGACTGGGTACT  
CCTACTTCCCTTGGCCCTCTACCGAGCCCGCAACACTCCGGGCCCCCATGGACTCACTCCGTATGAAATCCTGTATGGGG  
CGCCCCCGCCCCCTTGTTAATTTCCATGATCCTGAAATGTCAAAGTTTACTAATAGCCCCCTCTCTCCAAGCTCACTTACAG  
GCCCTCCAAGCAGTACAACAAGAGGTCTGGAAGCCGCTGGCCGCTGCCTATCAGGACCAACAAGACCAGCCTGTGATACC  
ACACCCCTTCCGTGTGCGCGACACCGTGTGGGTACGCCGGCACCAGACTAAGAACTTGGAACCTCGCTGGAAGGACCCCT  
ACACCGTCTCTGCTGACCACCCCCACCGCTCTCAAAGTAGACGGCATCGCTGCGTGGATCCACGCCGCTCAGCTAAAAGCG  
GCGACAACCCCTCCGGCCGGAACAGCATCAGGACCGACATGGAAGGTCCAGCGTTCTCAAACCCCTTAAAGATAAGATT  
AACCCGTGGGCCCCCCTGATAGTCCTGGAGATCTTAATAAGGGCAGGAGTATCAGTACCACATGACAGCCCTCATCAGGT  
CTTCAATGTTACTTGGAGAGTTACCAACTTAATGACAGGACAAACAGCTAATGCTACCTCCCTCCTGGGGACAATGACCG  
ATGCCTTTCCCAAACCTGTACTTTGACTTGTGCGATTTAATAGGGGACGACTGGGATGAGACTGGACTCGGGTGTGCGACT  
CCCGGGGGAAGAAAAAGGGCAAGAACATTTGACTTCTATGTTTGCCCCGGGCATACTGTACCAACAGGGTGTGGAGGCC  
GAGAGAGGGCTACTGTGGCAAATGGGGCTGTGAGACCACTGGACAGGCATACTGGAAGCCATCATCATCATGGGACCTAA  
TTTCCCTTAAGCGAGGAAACACCCCTCGGAATCAGGGCCCCCTGTTATGATTCTCAGCGGTCTCCAGTGGCATCCAGGGT  
GCCACACCGGGGGGTGATGCAATCCCCTAGTCCTAGAATTCAGTGACGCGGGTAAAAAGGCCAGCTGGGATGGCCCCAA  
AGTATGGGGACTAAGACTGTACCGATCCACAGGAACCGACCCGGTGACCCGGTTCTCTTTGACCCGCCAGGTCTCAATA  
TAGGGCCCCGCATCCCCATTGGGCCTAATCCCGTGATCACTGACCAGTTACCCCCCTCCCGACCCGTGCAGATCATGCTC  
CCCAGGCCTCCTCAGCCTTCCCCCTACAGGCGCAGCCTCTATACAACCTGGGACGGGAGACAGACTGCTGAACCTGGTAGA  
TGGAGCCTACCAAGCACTCAACCTCACCAGTCCTGACAAAACCCAAGAGTGCTGGTTGTGTCTGGTATCGGGACCCCCCT  
ATTACGAAGGGGTGCGCTCCTAGGTACCTACTCCAACCATACTCTGCCCCAGCTAACTGCTCCGTGGCCTCCCAACAC  
AAGCTGACCCTGTCCGAAGTAACCGACAGGGACTCTGCGTAGGAGCAGTTCCCAAAACCCATCAGGCCCTGTGTAATAC  
CACCCAGAATACAAGCGACGGGTCTACTATCTGGCTGCTCCCGCCGGGACCATTGTTGGCTTGCAACACCGGGCTCACTC  
CCTGCCTATAAAAGAGAGCCGGTGTCTAATACTCTGGCCCTGCTGTTGGGAGGACTTACTATGGGCGGCATAGCTGCAGG  
AGTAAGAAGAGGACTACAGCCCTAGTGGCCACCAAGCAATTCGAGCAGCTCCAGGCAGCTACAGACACCTTGGGG  
CCTTAGAAAAATCAGTCAGTGCCTTAGAAAAGTCTCTGACCTCGTTGTCTGAGGTGGTCTACAGAACCCGAGAGGATTA  
GATCTACTGTTCTTAAAGAAGGAGGATTATGTGCTGCCCTAAAGAAGAATGCTGCTTCTACGCGGACCACACTGGCGT  
AGTGAGAGATAGCATGGCAAAGCTAAGAGAAAGGTTAAACCAGAGACAAAAATTGTTTGAATCAGGACAAGGGTGGTTTG  
AGGGACTGTTTTAACAGGTCCCCATGGTTTACGACCTTGATATCCACCATTATGGGCCCCCTTGATAATACTCTTATTAATC  
CTACTCTTCGGACCCTGTATTCTCAACCGCTTGGTCCAGTTTGTAAAAGACAGAATTTCCGGTGGTGCAGGCCCTGGTTCT  
GACCCAACAGTATCACCAACTCAAATCAATAGGTCCAGAAGAAGTGGAATCACGTGAATAAAAGATTTTATTAGTTTCC  
AGAAAGAGGGGGGAATGAAAGACCCACCATAAGGCTTAGCAAGCTAGCTGCAGTAACGCCATTTTTGCAAGGCATGAAA  
AAGTACCAGAGCTGGGTTCTCAAAAGTTACAAGGAAGTTCAGTTATAGATTAACAGTTAAAGATCAAGGCTGAATAGCAC  
TGGGACAGGGGCCGAACAGGATATCGGTGATCAAGCACCTGGGCCCCGGCTCAGGGCCAAGAACAGATGGTTCTCAGATA  
AAGCGGAACCAGCAACAGACACAGAAGCCCCGATAGACGTCAGTGTTAGCAGAACTAGCTTCACTGATTTAGAAAAATAG  
AGGTGCACAGTGCTCTGGTCACTCCTTGAACCTGTGTGTCTGCCAATGTTCTGACCAGATATGTGCCATTGCTGAACCT  
TCATTAGACTCTTTTCTTGTACCCCTCCCCTACCCATTTCTTGAAAATAGACATTGTTTAGATCTAAAAAGTCCCACCTC  
AGTTTTCCCCAAATGACCGGGAAGTACCCCAAACCTTATTTCGAACTAACCAACCAGCTCGCTTCTCGCTTCTGTAACCGCG  
CTTTTTGCTCCCCAGCCCTAGCCCTATAAAAAGGGTAAAAACTCCACACTCGGCGCGCCAGTCTCCGATAGACTGAGTC  
GCCCCGGTACCCGTGTTCCCAATAAAGCCTCTTGCTGTTTACATCCGAATCGTGGACTCGCTGATCCTTGGGAGGGTCTC  
CTCAGATTGATTGACTGCCCACCTGGGGGGTCTTTCA

>Mpmv11

TGAAAGACCCACCATAGGCTTAGCAAGCTAGCTGCAGTAACGCCATTTTGAAGGCATGAAAAAGTACCAGAGCTGGG  
TTCTCAAAAGTTACAAGGAAGTTCAGTTATAGATTAACAGTTAAAGATCAAGGCTGAATAGCACTGGGACAGGGGCCGAA  
CAGGATATCGGTGGTCAAGCACCTGGGCCCCGGCTCAGGGCCAAGAACAGATGGTTCTCAGATAAAGCGGAACCAGCAAC  
AGACACAGAAGCCCCGATAGACGTCAGTGTTAGCAGAACTAGCTTCACTGATTTAGAAAAATAGAGGTGCACAGTGCTCT  
GGTCACTCCTTGAACCTGTGTGTCTGCCAATGTTCTGACCAGATATGTGCCATTGCTGAACCTTCATTAGACTCTTTCC  
TTGTACCCCTCCCCTACCCATTTCTTGAAAATAGACATTGTTTAGATCTAAAAAGTCCCACCTCAGTTTCCCCAAATGAC  
CGGGAAGTACCCCAAACCTTATTTCGAACTAACCAACCAGCTCGCTTCTCGCTTCTGTAACCGCGCTTTTTGCTCCCCAGC  
CCTAGCCCTATAAAAAGGGTAAAAACTCCACACTCGGCGCGCCAGTCTCCGATAGACTGAGTCGCCCCGGGTACCCGTGT  
TCCCAATAAAGCCTCTTGCTGTTTACATCCGAATCGTGGACTCGCTGATCCTTGGGAGGGTCTCCTCAGATTGATTGACT  
GCCCACCAGGGGGGTCTTTTCAATTTGGAGGTTCCACCGAGATCAGGAGACCCCTGCCAGGGACCACCGACCCCCGCCGGG  
AGGTAAGCTGGCCAGCGGTGTTTTGTGTCTGTCTCTGTCTCCGTGCGTGTTTTGTGCCGGCATCTAATGTTTGGCGCTGC  
GTCTGTACTAGTTGGCTAACTAGATCTGTATCTGGCGGTTCCGCGGAAGAAGTACGAGTTTCGTATTCGCGCCGCGAGCC  
CCTGGGAGACGTCCCAGCGGCCTCGGGGGCCGTTTTGTGGCCATTCTGTATCAGTTAACCTACCCGAGTCGGACTTTT

TGGAGCTCCGCCACTGTACGTGGCTTTGTTGGGGGACGAGAGACAGAGACACTTCCCGCCCCCGTCTGGATTTTTTGCTTT  
CGGTTTTACGCCGAAACCGCGCTGCGCGTCTGATTTGTTTTATTGCTCTTTTGTTCTTCGTTAGTTTTTCTGTCTTTAA  
GTGTTTTCAAGATCATGGGACAGACCGTAACCTACCCCTCTGAGTCTAACCTTGACGACTGGGGAGATGTCCAGCGCATT  
GCATCCAACCAAGTCTGTGGATGTGAGGAAGAGGCGCTGGATTACCTTCTGTTCCGCCGAATGGCCAACCTTTCAATGTAGG  
ATGGCCTCAGGATGGTACTTTCAATTTAAGTATTATCTCTCAGGTTAAGTCTAGAGTGTTTTGTCTGGTCCCCACGGAC  
ACCCGGATCAGGTCCCATATATCGTTACCTGGGAGGCACTTGCCTATGACCCCCCTCCGTGGGTCAAACCGTTTGTCTTCT  
CCTAAACCTCCTCCCTTGCCGACAGCTCCCGTCTCCCGCCCGGTCTTCTGCGCAACCTCCGTCCCGATCTGCCCTTTA  
CCCTGCCCTTACCCCTCTATAAAGTCCAAACCTCCTAAGCCCCAGGTTCTCCCTGATAGCGGCGGACCTCTCATTGACC  
TTCTCACAGAGGACCCCCGCGGTACGGAGCACAACTTCTCTCTGCCAGAGAGAACGATGAAGAAGAGGCGGCCACC  
ACCTCCGAGGTTTTCCCCCTTCTCCATGGCGTCTCGACTGCGGGGAAGGAGAGACCCTCCCGCAGCGGACTCCACCTC  
CTCCCAGGCATTCCCACTCCGTATGGGGGAGATGGCCAGCTTCAGTACTGGCCGTTTTCTCCTCTGACTTATATAATT  
AGAAAAATAATAACCTTCTTTTTCTGAAGATCCAGGTAAATTGACGGCCTTGATTGAGTCCGTCTCATCCCCACCAG  
CCCACCTGGGACGACTGTGACGAGTTGTTGGGGACCCTGCTGACCGGAGAAGAAAAGCAGCGGGTGCTCCTAGAGGCTAG  
AAAGGCAGTCCGGGGCAATGATGGACGCCCCACTCAGTTGCCTAATGAAATCAATGCTGCCTTTCCCTCGAGCGCCCTG  
ATTGGGATTACACCACTACAGAAGGTAGGAACCACCTAGTCCTCTATCGCCAGTTGCTCTTAGCGGGTCTCCAAAACGCG  
GGCAGAAGCCCCACCAATTTGGCCAAGGTAAAAGGGATAACCCAGGGACCTAATGAGTCTCCCTCAGCCTTTTTAGAGAG  
ACTCAAGGAGGCTATCGCAGGTACACTCCTTATGACCCTGAGGACCCAGGGCAAGAAACCAATGTGTCTATGTCATTCA  
TCTGGCAGTCTGCCCCGATATCGGGCGAAAGTTAGAGCGGTTAGAAGATTTAAAGAGCAAGACCTTAGGAGACTTAGTG  
AGGGAAGCTGAAAAGATCTTTAATAAACGAGAAACCCCGGAAGAAAGAGAGGAACGTATCAGGAGAGAAACAGAGGAAAA  
AGAAGAACGCCGTAGGGCAGAGGATGAGCAAAAAGAGAAAGAAAGGGACCGCAGAAGACATAGAGAGATGAGCAAGCTCT  
TGGCCACTGTAGTTATTGGTCAGAGACAGGATAGACAGGGGGGAGAGCGGAAGAGGCCCAACTTGATAAAGATCAATGC  
GCCTACTGCAAAGAAAAGGGACACTGGGCTAAAGACTGCCCAAAGAAGCCACGAGGGCCCCGAGGACCGAGGCCCCAGAC  
CTCCCTCCTGACCTTAGGTGACTAGGGAGGTGAGGTCAGGGTCAGGAGCCCCCCCCCTGAACCCAGGATAACCTCAAAGTCGGGG  
GGCAACCCGTCACCTTCTGGTAGATACTGGGGCCCAACACTCCGTGCTGACCCAAAATCCTGGACCCCTAAGTGACAAG  
TCTGCCTGGGTCCAAGGGGCTACTGGAGGAAAGCGGTATCGCTGGACCACGGATCGCAAAGTGATCTAGCTACCGGTAA  
GGTCACCCACTCTTTCTCCATGTACCAGACTGCCCCCTATCCTCTGCTAGGAAGAGATTTGCTGACTAAACTAAAAGCCC  
AAATCCACTTTGAGGGATCAGGAGCTCAGGTTATGGGACCAATGAGGACCCCTGCAAGTCTGACCCTAAACATAGAA  
GATGAGTACTCGGTACATGAGACCTCAAAGAGCCGGATGTTTCTCTAGGGTCCACATGGCTTTCTGATTTTTCCCCAGGC  
CTGGGCGGAAACCGGGGGCATGGGACTGGCAGTTGCGCAAGCTCCTCTGATCATACCTCTGAAGGCAACCTCTACCCCCG  
TGTCATAAAACAATAACCCATGTGACAAGAAGCCAGACTGGGGATCAAGCCCCACATACAGAGACTGTTGGACCAGGGA  
ATACTGGTACCCTGCCAGTCCCCCTGGAACATGCCCCCTGCTACCCGTTAAGAAACCAGGGACTAATGATTACAGGCCTGT  
CCAAGATCTGAGAGAAGTCAACAAGCGGGTGAAGACATCCACCCACCGTGCCCAACCTTACAACCTCTTGAGCGGGC  
TCCCACCGTCCCACCACTGGTACACTGTGCTTGACTTAAAGGATGCCTTTTTCTGCCTAAGACTCCACCCACCACTGAG  
CCTCTCTTCGCTTTGAGTGGAGAGACCCAGAGATGGGAATCTCAGGACAATTAACCTGGACCAGACTCCCACAGGGTTT  
CAAAAACAGTCCCACCTGTTTGATGAGGCACTGCACAGAGACCTAGCAGGCTTCCGGATCCAGCACCCAGACTTGATCC  
TGCTACAGTACGTGGATGACTTACTGCTGGCCGCCACTTCTGAGCTCGACTGCCAACAAGGTACTCGGGCCCTGTTACAA  
ACCTTAGGGGACCTCGGGTATCGGGCCTCGGCCAAGAAAGCCCAAATTTGCCAGAAACAGGTCAAGTATCTGGGGTATCT  
TCTAAAGAGGGTCAGAGATGGCTGACTGAGGCCAGAAAAGAGACTGTGATGGGGCAGCCTATTCCGAAGACCCCTCGAC  
AACTAAGGGAGTTCCTAGGGACGGCAGGCTTCTGTGCGCTCTGGATCCCTGGGTTTGAGAAATGGCAGCCCCCTTGATC  
CCTCTCACAAAACGGGGACTCTGTTTAATTGGGGCCAGACCAGCAAAAGGCCTATCAAGAAATCAAACAGGCTCTTCT  
AACTGCCCCAGCCCTGGGGTTGCCAGATTTGACTAAGCCCTTTGAACTCTTTGTGACGAGAAGCAGGGCTACGCCAAAG  
GCGTCCTAACGCAAAAACCTGGGACCTTGGCGTCGGCCGGTGGCCTACCTGTCCAAAAGCTAGACCCAGTGGCAGCTGGG  
TGGCCCCCTTGCCCTACGAATGGTAGCAGCCATTGCCGTTCTGACAAAGGATGCAGGCAAGCTAACTATGGGACAGCCGT  
AGTCATTCTGGCCCCCATGCGGTAGAAGCACTGGTCAAACAACCCCTGACCGCTGGCTATCCAATGCTCGCATGACCC  
ACTATCAGGCAATGCTCCTAGATACGGACCGAGTTCAGTTCGGACCGGTGGTAGCCTTAAACCCGGCCACGTTGCTCCCC  
TTGCCGGGAAAAGAGACCCCCACGACTGCCTCGAGATCTTGGCTGAGACACACGGCACCGACCCGACCTCACGGACCA  
GCCCCCTCCCAATGCCGACCACACCTGGTATACAGATGGAAGCAGCTTCCTGCAGGAGGGGCAACGTAAGGCTGGAGCAG  
CGGTGACCACCGAGACCGAGGTAATCTGGGCCAAGGCGTTGCCAGTCGGGACATCCGCCCAGCGAGCTGAACCTAATAGCA  
CTACCCAGGCCCTAAAGATGGCAGAAGGTAAAGAAGCTAAATGTTTATACTGATAGCCGCTATGCCTTTGTACCGCCCA  
TGTCCATGGAGAAATATATAGGAGACGTGGGTGCTCACCTCAGAAGGCAAGGAGATCAAGAACAAGGGCGAAATCTTGG  
CCTTACTGAAAGCTCTCTTTCTGCCAAAAGACTCAGTATAATTCACTGCCCAGGACATCAGAAAGGCAATAGTGCTGAA  
GCTAAAGGCAACCGAATGGCGGACCAGGCAGCCCGGAAGCAGCCATGGGGACTGACACAAAGGCCTCCTCACTTCTCAT  
AGAGACCTCAACCCCGTACACTCCAGACTTCTTCCATTATACTGAAACAGATATAAAGAACCTACGAGAGTTGGGAGCCA  
CATATGATAGAGAGAAAAAATATTGGGTCTGCAAGGTAAACCTGTGATGCCTGACCAGTTCACCTTTGAATTATTAGAC  
TTCCTTACCAGCTACCCACCTTAGCTATCAGAAGATGAGGGCACTTCTAGACAGAAAAGAAAGCCCTTATTACATGCT  
AAATAAAGATAAGATCCTCCACGAGGTGGCGGAATCATGCCAAGCCTGTGTCCAAGTAAATGCCAGTAAAGCTAAGGTGCG  
GTCCCGGGGTGCGAGTAAGAGGACATCGACCAGGCACCCATTGGGAAATTGACTTTACTGAAGTAAGGCCCGGACTGTAT

GGGCATAAGTATCTTCTGGTGTTTTGTGGACACGTTCTCTGGCTGGGTGGAAACCTTCCCAACCAAGCATGAGACTGCCAA  
AGTTGTGACCAAAAAGCTTCTAGAAAGAAATATTTCCAAGGTTTGAATGCCCAAGTATTGGGGACTGATAATGGGCCTG  
CCTTCGTCTCCAGGTAAAGTCAGTCGGTGGCCAAGCTACTGGGGATTGATTGGAACTACATTGTGCTTACAGACCCAG  
AGTTCAGGTCAAGTAGAAAGAATGAATAGGACAATCAAGGAGACTTTGACCAAATTAACGCTTGCAACTGGCACTAGAGA  
CTGGGTACTCCTACTTCCCTTGGCCCTCTACCGAGCCCGCAACACTCCGGGCCCCCATGGACTCACTCCGTATGAAATCC  
TGTATGGGGCGCCCCCGCCCTTGTTAATTTCCATGATCCTGAAATGTCAAAGTTTACTAATAGCCCCCTCTCTCCAAGCT  
CACTTACAGGCCCTCCAAGCAGTACAACGAGAGGTCTGGAAGCCTCTGGCCGCTGCCTATCAGGACCAACAAGACCAGCC  
TGTGATACCACACCCCTTCCGTGTGGCGACACCGTGTGGGTACGCCGGCACCAGACTAAGAACTTGGAACTTCGCTGGA  
AAGACCCTACACCGTCTGTGACCACCCCCACCGTCTCAAAGTAGACGGCATCGCTGCGTGGATCCACGCCGCTCAC  
GTAAAAGCGGCGACAACCCCTCCGGCCGGAACAGCATCAGGACCGACATGGAAGGTCCAGCGTTCTCAAACCCCTTAAA  
GATAAGATTAAACCGTGGGCCCCCTGATAGTCCTGGGGATCTTAATAAGGGCAGGAGTATCAGTACCACATGACAGCCC  
TCATCAGGTCTTCAATGTTACTTGGAGAGTTACCAACTTAATGACAGGACAAACAGCTAATGCTACCTCCCTCCTGGGGA  
CAATGACCGATGCCTTTCCCAAAGTGTACTTTGACTTGTGCGATTTAATAGGGGACGACTGGGATGAGACTGGACTCGGG  
TGTGCACTCCCGGGGAAGAAAAAGGGCAAGAACATTTGACTTCTATGTTTGCCCCGGGCATACTGTACCAACAGGGTG  
TGGAGGCCGAGAGAGGGTACTGTGGCAAATGGGGCTGTGAGACCACTGGACAGGCATACTGGAAGCCATCATCATCAT  
GGGACCTAATTTCCCTTAAGCGAGGAAACACCCCTCGGAATCAGGGCCCCTGTTATGATTCTCAGCGGTCTCCAGTGGC  
ATCCAGGGTGCCACACCGGGGGGTGATGCAATCCCTAGTCTTAGAATTCAGTGACGCGGGTAAAAAGGCCAGCTGGGA  
TGGCCCCAAAGTATGGGGACTAAGACTGTACCGATCCACAGGAACCGACCCGGTGACCCGGTTCTCTTTGACCCGCCAGG  
TCCTCAATATAGGGCCCCGCATCCCCATTGGGCCTAATCCCGTGATCACTGACCAGTTACCCCCCTCCCGACCCGTGCAG  
ATCATGCTCCCCAGGCCTCCTCAGCCTTCCCCTACAGGCGCAGCCTCTATACAACCTGGGACGGGAGACAGACTGCTGAA  
CCTGGTAGATGGAGCCTACCAAGCACTCAACCTCACCAGTCCTGACAAAACCAAGAGTGCTGGTTGTGTCTGGTATCGG  
GACCCCCCTATTACGAAGGGGTTGCCGTCTAGGTACCTACTCCAACCATACTCTGCCCCAGCTAACTGCTCCGTGGCC  
TCCCAACACAAGCTGACCCTGTCCGAAGTAACCGGACAGGGACTCTGCGTAGGAGCAGTTCCCAAAACCCATCAGGCCCT  
GTGTAATACCACCCAGAATACAAGCGACGGGTCTACTATCTGGCTGCTCCCGCCGGGACCATTTGGGCTTGCAACACCG  
GGCTCACTCCCTGCCTATCTACTACTGTACTCAACCTCACCACCGATTACTGTGTCTCTGGTTGAGCTCTGGCCAAAGGTG  
ACCTACCACTCCCCTGGTTATGTTTATGGCCAGTTTGAGAGAAAAACCAATATAAAAGAGAGCCGGTGTCACTAACTCT  
GGCCCTGCTGTTGGGAGGACTTACTATGGCGGCATAGCTGCAGGAGTAGGAACAGGGACTACAGCCCTAGTGGCCACCA  
AGCAATTCGAGCAGCTCCAGGCAGCCATACATACAGACCTTGGGGCCTTAGAAAAATCAGTCAGTCCCCATAAAAAAGTCT  
CTGACCTCGTTGTCTGAGGTGGTCTACAGAACCGGAGAGGATTAGATCTACTGTTCTCTAAAAGAAGGAGGATTATGTGC  
TGCCCTAAAAGAAGAATGCTGTTTCTACGCGGACCACACTGGCGTAGTGAGAGATAGCATGGCAAAGCTAAGAGAAAGGT  
TAAACCAGAGACAAAAATTGTTTGAATCAGGACAAGGGTGGTTTGGGGGACTGTTTAAACAGGTCCCCATGGTTACAGACC  
TTGATATCCACCATTATGGGCCCTTGATAATACTCTTATTAATCCTACTCTTCGGACCCCTGTATTCTCAACCGCTTGGT  
CCAGTTTGTAAAAGACAGAATTTCCGGTGGTGCAGGCCCTGGTTCTGACCCAACAGTATACCAACTCAAATCAATAGGTC  
CAGAAGAAGTGGAATCACGTGAATAAAAGATTTTATTAGTTTCCAGAAAGAGGGGGGAATGAAAGACCCCAACATAAGG  
CTTAGCAAGCTAGCTGCAGTAACGCCATTTTGAAGGCATGAAAAAGTACCAGAGCTGGGTTCTCAAAGTTACAAGGAA  
GTTTCAGTTATAGATTAACAGTTAAAGATCAAGGCTGAATAGCACTGGGACAGGGGCCGAACAGGATATCGGTGGTCAAGC  
ACCTGGGCCCCGGCTCAGGGCCAAGAACAGATGGTTCTCAGATAAAGCGGAACCAGCAACAGACACAGAAGCCCCGATAG  
ACGTCAGTGTTAGCAGAACTAGCTTCACTGATTTAGAAAAATAGAGGTGCACAGTGCTCTGGTCACTCCTTGAACCTGTG  
TGTCTGCCAATGTTCTGACCAGATATGTGCCCATTGCTGAACCTTCATTAGACTCTTTTCTTGTACCCCTCCCCCTACCCA  
TTTCTTGAAAATAGACATTGTTTATAGATCTAAAAAGTCCCACCTCAGTTTTCCCCAAATGACCGGGAAGTACCCCAAACCTT  
ATTGAACTAACCAACCAGCTCGCTTCTCGCTTCTGTAACCGCGCTTTTTGCTCCCCAGCCCTAGCCCTATAAAAAGGGT  
AAAACTCCCACTCGGCGCGCCAGTCCTCCGATAGACTGAGTCGCCCCGGGTACCCGTGTTCCCAATAAAGCCTCTTGCT  
GTTTACATCCGAATCGTGGACTCGCTGATCCTTGGGAGGGTCTCCTCAGATTGATTGACTGCCCACCAGGGGGGTCTTTC

A

>Mpmv12

TGAAAGACCCCAACATAAGGCTTAGCAAGCTAGCTGCAGTAACGCCATTTTGAAGGCATGAAAAAGTACCCGAGCTGGG  
TTCTCAAAAGTTACAAGGAAGTTCAAGTTATAGATTAACAGTTAAAGATCAAGGCTGAATAGCACTGGGACAGGGGCCGAA  
CAGGATATCGGTGATCAAGCACCTGGGCCCCGGCTCAGGGCCAAGAACAGATGGTTCTCAGATAAAGCGGAACCAGCAAC  
AGACACAGAAGCCCCGATAGACGTCAAGTGTAGCAGAACTAGCTTCACTGATTTAGAAAAATAGAGGTGCACAGTGCTCT  
GGTCACTCCTTGAACCTGTGTGTCTGCCAATGTTCTGACCAGATATGTGCCCATTGCTGAACCTTCATTAGACTCTTTCC  
TTGTACCCCTCCCCTACCCATTTCTTGAAAATAGACATTGTTTATAGATCTAAAAAGTCCCACCTCAGTTTTCCCCAAATGAC  
CGGGAAGTACCCCAAACCTTATTGAACTAACCAACCAGCTCGCTTCTCGCTTCTGTAACCGCGCTTTTTGCTCCCCAGC  
CCTAGCCCTATAAAAAGGGTAAAACTCCCACTCGGCGCGCCAGTCCTCCGATAGACTGAGTCGCCCCGGGTACCCGTGTTCCCAATAAAGCCTCTTGCT  
TCCCAATAAAGCCTCTTGCTGTTTACATCCGAATCGTGGACTCGCTGATCCTTGGGAGGGTCTCCTCAGATTGATTGACT  
GCCCACCTGGGGGGGGTCTTTCAATTTGGAGGTCCCACCGAGATCAGGAGACCCCTGCCAGGGACCACCGACCCCCGCCG  
GGAGGTAAGCTGGCCAGCGGTGTTTTGCTGTCTGTCTCTGCTCCTGCTGCTGTTTGTGCCGGCATCTAATGTTTGCCT  
GCGTCTGTACTAGTTGGCTAACTAGATCTGTATCTGGCGGTTCCGCGGAAGAACTGACGAGTTCGTATTCGCGCCGAG

CCCCTGGGAGACGTCCCAGCGGCCTCGGGGGCCCGTTTTGTGGCCATTCTGTATCAGTTAACCTACCCGAGTCGGACTT  
TTTGGAGCTCCGCCACTGTACGTGGCTTTGTTGGGGGACGAGAGACAGAGACACTTCCCGCCCCCGTCTGGATTTTTGCT  
TTCGGTTTTACGCCGAAACCGCGCTGCGCGTCTGATTTGTTTTATTGCTCTTTTGTTCCTCGTTAGTTTTTCTGTCTTT  
AAGTGTTCATAGATCATGGGACAGACCGTAACCTACCCCTCTGAGTCTAACCTTGACGACTGGGGAGATGTCCAGCGCA  
TTGCATCCAACCAGTCTGTGGATGTCAGGAAGAGGCGCTGGATTACCTTCTGTTCCGCCGAATGGCCAACCTTCAATGTA  
GGATGGCCTCAGGATGGTACTTTCAATTTAAGTATTATCTCTCAGGTTAAGTCTAGAGTGTTCCTGGTCCCCACGG  
ACACCCGGATCAGGTCCCATATATCGTTACCTGGGAGGCACTTGCCCTATGACCCCCCTCCGTGGGTCAAACCGTTTGT  
CTCCTAAACCTCCTCCCTTGCCGACAGCTCCCGTCTCCCGCCCGGTCTTCTGCGCAACCTCCGTCCCGATCTGCCCTT  
TACCCTGCCCTTACCCCTCTATAAAGTCCAAACCTCCTAAGCCCCAGGTTCTCCCTGATAGCGGCGGACCTCTCATTGA  
CCTTCTCAGAGGACCCCCCGGTACGGAGCACAACTTCTCCTCTGCCCAGAGAGAAGCAAGAGAGGCGGCCA  
CCACCTCCGAGGTTTTCCCCCTTCTCCCATGGCGTCTCGACTGCGGGGAAGGAGAGACCCTCCCGCAGCGGACTCCACC  
TCCTCCAGGCATTCCCACTCCGTATGGGGGAGATGGCCAGCTTCAGTACTGGCCGTTTTCTCCTCTGACTTATATAA  
TTGGAAAAATAATAACCTTCTTTTTCTGAAGATCCAGGTAAATTGACGGCCTTGATTGAGTCCGTCTCATACCCACC  
AGCCACCTGGGACGACTGTCAGCAGTTGTTGGGGACCCTGCTGACCGGAGAAGAAAAGCAGCGGGTGCTCCTAGAGGCT  
AGAAAGGCAGTCCGGGGCAATGATGGACGCCCCACTCAGTTGCCTAATGAAATCAATGCTGCCTTTCCCCTTGAGCGCCC  
TGATTGGGATTACACCACTACAGAAGGTAGGAACCACCTAGTCCTCTATCGCCAGTTGCTCTTAGCGGGTCTCCAAAACG  
CGGGCAGAAGCCCCACCAATTTGGCCAAGGTAAAAGGGATAACCCAGGGACCTAATGAGTCTCCCTCAGCCTTTTTAGAG  
AGACTCAAGGAGGCCTATCGCAGGTACACTCCTTATGACCCTGAGGACCCAGGGCAAGAAACCAATGTGTCTATGTCATT  
CATCTGGCAGTCTGCCCCGATATCGGGCGAAAGTTAGAGCGGTTAGAAGATTTTAAGAGCAAGACCTTAGGAGACTTAG  
TGAGGGAAGCTGAAAAGATCTTTAATAAACGAGAAACCCCGGAAGAAAGAGAGGAACGTATCAGGAGAGAAACAGAGGAA  
AAAGAAGAAGCCCGTAGGGCAGAAGATGAGCAGAAAGAGAAAGAAAGGGACCGCAGAAGACATAGAGAGATGAGCAAGCT  
CTTGGCCACTGTAGTTATTGGTCAGAGACAGGATAGACAGGGGGGAGAGCGGAAGAGGCCCAACTTGATAAGGATCAAT  
GCGCCTACTGCAAAGAAAAGGGACACTGGGCTAAAGACTGCCCAAAGAAGCCACGAGGGCCCCGAGGACCGAGGCCCCAG  
ACCTCCCTCCTGACCTTAGGTGACTAGGGAGGTGAGGTGAGGAGCCCCCCCCCTGAACCCAGGATAACCCCTCAAAGTCGG  
GGGGCAACCCGTCACCTTCTGGTGGATACTGGGGCCCAACTCCGTGCTGACCCAAAATCCTGGACCCCTAAGTGACA  
AGTCTGCCTGGGTCCAAGGGGCTACTGGAGGAAAGCGGTATCGCTGGACACCGGATCGCAAAGTGCATCTAGCTACCGGT  
AAGTCAACCACTTTGAGGATCAGGAGCTCAGGTTGTGGGACCAATGGGACAGCCCCCTGCAAGTGTGACCTAAACAAAGC  
CCAAATCCACTTTGAGGATCAGGAGCTCAGGTTGTGGGACCAATGGGACAGCCCCCTGCAAGTGTGACCTAAACATAG  
AAGATGAGTATCGGTACATGAGACCTCAAAGAGCCGGATGTTTTCTCTAGGGTCCACATGGCTTTCTGATTTTTCCCGAG  
GCCTGGGCGGAAACCGGGGGCATGGGACTGGCAGTTGCGCAAGCTCCTCTGATCATACCTCTGAAGGCAACCTCTACCCC  
CGTGTCCATAAAACAATACCCCATGTACACAAGAAGCCAGACTGGGGATCAAGCCCCACATACAGAGACTGTTGGACCAGG  
GAATACTGGTACCCTGCCAGTCCCCCTGGAACACGCCCCCTGCTACCCGTTAAGAAACCAGGGACTAATGATTACAGGCCT  
GTCCAAGATCTGAGAGAAGTCAACAAGCGGGTGAAGACATCCACCCACCGTGCCCAACCCCTTACAACCTCTTGAGCGG  
GCTCCACCGTCCACCACTGGTACACTGTGCTTGACTTAAAGGATGCCTTTTTCTGCCTGAGACTCCACCCACCACTC  
AGCCTCTCTTCGCCTTTGAGTGGAGAGACCCAGAGATGGGAATCTCAGGACAATTAACCTGGACCAGACTCCCACAGGGT  
TTCAAAAACAGTCCCACCTGTTTGATGAGGCACTGCACAGAGACCTAGCAGGCTTCCGGATCCAGCACCCAGACTTGAT  
CCTGCTACAGTACGTGGATGACTTACTGCTGGCCGCCACTTCTGAGCTCGACTGCCAACAAGGTACTCGGGCCCTGTTAC  
AAACCTAGGGGACCTCGGGTATCGGGCCTCGGCCAAGAAAGCCCAAATTTGCCAGAAACAGGTCAAGTATCTGGGGTAT  
CTTCTAAAAGAGGGTCAGAGATGGCTGACTGAGGCCAGAAAAGAGACTGTGATGGGGCAGCCTATTCCGAAGACCCCTCG  
ACAATAAGGGAGTTCTAGGGACGGCAGGCTTCTGTGCGCTCTGGATCCCTGGGTTTGAGAAATGGCAGCCCCCTTGT  
ATCCTCTCACAAAACGGGGACTCTGTTTAATTGGGGCCAGACCAGCAAAAGGCCTATCAAGAAATCAAACAGGCTCTT  
CTAACTGCCCCAGCCCTGGGGTTGCCAGATTTGACTAAGCCCTTTGAACTCTTTGTGACGAGAAGCAGGGCTACGCCAA  
AGGCGTCTTAACGCAAAAACCTGGGACCTTGGCGTGGCCGGTGGCCTACCTGTCCAAAAGCTAGACCCAGTGGCAGCTG  
GGTGGCCCCCTTGCCCTACGGATGGTAGCAGCCATTGCCGTTCTGACAAAGGATGCAGGCAAGCTAACTATGGGACAGCCG  
CTAGTCATTCTGGCCCCCATGCGGTAGAAGCACTGGTCAAACAACCCCTGACCGCTGGCTATCCAATGCTCGCATGAC  
CCACTATCAGGCAATGCTCCTAGATACGGACCGAGTTCAGTTCGGACCGGTGGTAGCCTTAAACCCGGCCACGTTGCTCC  
CCTTGCCGGGAAAAGAGACCCCCACGACTGCCTCGAGATCTTGGCTGAGACACACGGCACCAGACCCGACCTCACGGAC  
CAGCCCCCTCCCAAATGCCGACCACACCTGGTATACAGATGGAAGCAGCTTCTGACAGGAGGGGCAACGTAAGGCTGGAGC  
AGCGGTGACCACCGAGACCGAGGTAATCTGGGCCAAGGCGTTGCCAGCCGGGACATCCGCCCAGCGAGCTGAACCTAATAG  
CACTACCCAGGCCCCTAAGATGGCAGAAGGTAAGAAGCTAAATGTTTATACTGATAGCCGCTATGCCTTTGCTACCGCC  
CATGTCCATGGAGAAATATATAGGAGACGTGGGTGCTCACCTCAGAAGGCAAGGAGATCAAGAACAAGGGCGAAATCTT  
GGCCTTACTGAAAGCTCTCTTTCTGCCAAAAGACTCAGTATAATTCACTGCCCAGGACATCAGAAAGGCAATAGTGCTG  
AAGCTAAAGGCAACCGAATGGCGGACCAGGCAGCCCGGAAGCAGCCATGGGGACTGACACAAAGGCCTCCTCACTTCTC  
ATAGAGACCTCAACCCCGTACACTCCAGACTTCTTCCATTATACTGAAACAGATATAAAGAACCTACGAGAGTTGGGAGC  
CACATATAATAGAGAAAAAAATATTGGGTCTGCAAGGTAAACCTGTGATGCCTGACCAGTTCACCTTTGAATTATTAG  
ACTTCCTTACCAGCTACCCACCTTAGCTATCAGAAGATGAGGGCACTTCTAGACAGAAAAGAAAGCCCCATTACATG  
CTAAATAAAGATAAGATCCTCCACGAGGTGGCGGAATCATGCCAAGCCTGTGTCCAAGTAAATGCCAGTAAAGCTAAGGT

CGGTCCCGGGGTGCGAGTAAGAGGACATCGACCAGGCACCCATTGGGAAATTGACTTTACTGAAGTAAGGCCCGGACTGT  
ATGGGCATAAGTATCTTCTGGTGTGGTGACACGTTCTCTGGCTGGGTGGAAGCCTTCCCAACCAAGCATGAGACTGCC  
AAAGTTGTGACCAAAAGCTTCTAGAAAGAAATATTTCCAAGTTTTGGAATGCCCAAGTATTGGGGACTGATAATGGGCC  
TGCCTTCGTCTCCCAGGTAAGTCAGTCGGTGGCCAAGCTACTGGGGATTGATTGGAACTACATTGTGCTTACAGACCCC  
AGAGTTCAGGTCAGGTAGAAAGAATGAATAGGACAATCAAGGAGACTTTGACCAAATTAACGCTTGCAACTGGCACTAGA  
GACTGGGTACTCCTACTTCCCTTGGCCCTCTACCGAGCCCGCAACACTCCGGGCCCCCATGGACTCACTCCGTATGAAAT  
CCTGTATGGGGCGCCCCCGCCCTTGTTAATTTCCATGATCCTGAAATGTCAAAGTTTACTAATAGCCCCCTCTCTCCAAG  
CTCACTTACAGGCCCTCCAAGCGGTACAACGAGAGGTCTGGAAGCCTCTGGCCGCTGCCTATCAGGACCAACAAGACCAG  
CCTGTGATACCACACCCCTTCCGTGTGCGCGACACCGTGTGGGTACGCCGGCACCAGACTAAGAACTTGGAACTTCGCTG  
GAAAGGACCCTACACCGTCTGTGACCAACCCACCGCTCTCAAAGTAGACGGCATCGCTGCGTGGATCCACGCCGCTC  
ACGTAAAAGCGGCGACAACCCCTCCGGCCGGAACAGCATCAGGACCGACATGGAAGGTCCAGCGTTCTCAAACCCCTTTA  
AAGATAAGATTAACCCGTGGGCCCCCTGATAGTCCTGGGGATCTTAATAAGGGCAGGAGTATCAGTACCACATGACAGC  
CCTCATCAGGTCTTCAATGTTACTTGGAGAGTTACCAACTTAATGACAGGACAAACAGCTAATGCTACCTCCCTCCTGGG  
GACAATGACCGATGCCTTTCCCAAATGTACTTTGACTTGTGCGACTTAATAGGGGACGACTGGGATGAGACTGGACTCG  
GGTGTGCGACTCCCGGGGAAGAAAAAGGGCAAGAACATTTGACTTCTATGTTTGCCCCGGGCATACTGTACCAACAGGG  
TGTGGAGGCCCGAGAGAGGGCTACTGTGGCAAATGGGGCTGTGAGACCACTGGACAGGCATACTGGAAGCCATCATCATC  
ATGGGACCTAATTTCCCTTAAGCGAGGAAACACCCCTCGGAATCAGGGCCCCCTGTTATGATTCTCAGCGGTCTCCAGTG  
GCATCCAGGGTGCCACACCGGGGGGTGATGCAATCCCTAGTCCTAGAATTCAGTGACGCGGGTAAAAAGGCCAGCTGG  
GATGGCCCCAAAGTATGGGGACTAAGACTGTACCGATCCACAGGAACCGACCCGGTGACCCGGTTCTCTTTGACCCGCCA  
GGTCCTCAATATAGGGCCCCGCATCCCCATTGGGCCTAATCCCGTGATCACTGACCAGTTACCCCCCTCCCGACCCGTGC  
AGATCATGCTCCCCAGGCCTCCTCAGCCTTCCCCTACAGGCGCAGCCTCTATACAACCTGGGACGGGAGACAGACTGCTG  
AACCTGGTAGATGGAGCCTACCAAGCACTCAACCTCACCAGTCCTGACAAAACCAAGAGTGCTGGTTGTGTCTGGTATC  
GGGACCCCCCTATTACGAAGGGGTGGCCGTCTAGGTACCTACTCCAACCATACTCTGCCCCAGCTAACTGCTCCGTGG  
CCTCCCAACACAAGCTGACCCTGTCCGAAGTAACCGGACAGGGACTCTGCGTAGGAGCAGTTCCCAAAACCCATCAGGCC  
CTGTGTAATACCACCCAGAATACAAGCGACGGGTCTACTATCTGGCTGCTCCCGCCGGGACCATTGTTGGCTTGCAACAC  
CGGGCTCACTCCCTGCCTATCTACTACTGTACTCAACCTCACCACCGATTACTGTGTCTCTGGTTGAGCTCTGGCCAAAG  
TGACCTACCACGCCCCCTGGTTATGTTTATGGCCAGTTTGAGAGAAAAACAAATATAAAAGAGAGCCGGTGTCTATTAAT  
CTGGCCCTGCTGTTGGGAGGACTTACTATGGGCGGCATAGCTGCAGGATAGGAACAGGGACTACAGCCCTAGTGCCAC  
CAAGCAATTGCGAGCAGCTCCAGGCAGCCATACATACAGACCTTGGGGCCTTAGAAAAATCAGTCAAGTCCCTAGAAAAGT  
CTCTGACCTCGTTGTCTGAGGTGGTCCTACAGAACCGGAGAAGATTAGATCTACTGTTCTTAAAGAAGGAGGATTATGT  
GCTGCCCTAAAAGAAGAATGCTGTTTCTACGCGGACCACACTGGCGTAGTGAGAGATAGCATGGCAAAGCTAAGAGAAAG  
GTTAAACCAGAGACAAAAATTGTTTGAATCAGGACAAGGGTGGTTTGAGGGACTGTTTAAACAGGTCCCCATGGTTACGA  
CCTTGATATCCACCATTATGGGCCCTTGATAATACTCTTATTAATCCTACTCTTCGGACCCTGTATTCTCAACCGCTTG  
GTCCAGTTTGTAAAAGACAGAATTTGCGTGGTGACAGCCCTGGTTCTGACCCAACAGTATCATCAACTCAAATCAATAGG  
TCCAGAAGAAGTGAATCACGTGAATAAAAGATTTTATTAGTTTCCAGAAAGAGGGGGGAATGAAAGACCCCACCATAA  
GGCTTAGCAAGCTAGCTGCAGTAACGCCATTTTGCAAGGCATGAAAAAGTACCCGAGCTGGGTTCTCAAAGTTACAAGG  
AAGTTAGTTATAGATTAACAGTTAAAGATCAAGGCTGAATAGCACTGGGACAGGGGCCGAACAGGATATCGGTGATCAA  
GCACCTGGGCCCCGGCTCAGGGCCAAGAACAGATGGTTCTCAGATAAAGCGGAACAGCAACAGACACAGAAGCCCCGAT  
AGACGTCAAGTGTAGCAGAACTAGCTTCACTGATTTAGAAAAATAGAGGTGCACAGTGCTCTGGTCACTCCTTGAACCTG  
TGTGTCTGCCAATGTTCTGACCAGATATGTGCCCATTGCTGAACCTTCATTAGACTCTTTTCTTGTACCCCTCCCCCTACC  
CATTTCTTGAAAATAGACATTGTTTAGATCTAAAAAGTCCCACCTCAGTTTCCCCAAATGACCGGGAAGTACCCCAAACC  
TTATTGAACTAACCAACCAGCTCGCTTCTCGCTTCTGTAACCGCGCTTTTTGCTCCCCAGCCCTAGCCCTATAAAAAGG  
GTAAAACTCCACACTCGGCGCGCCAGTCCTCCGATAGACTGAGTCGCCCCGGGTACCCGTGTTCCCAATAAAGCCTCTTG  
CTGTTTACATCCGAATCGTGGACTCGCTGATCCTTGGGAGGGTCTCCTCAGATTGATTGACTGCCCACCTGGGGGGGGTC  
TTTCA

>Mpmv13

TGAAAGACCCCAACATAAGGCTTAGCAAGCTAGCTGCAGTAACGCCATTTTGAAGGCATGAAAAAGTACCAGAGCTGGG  
TTCTCAAAGTTACAAGGAAGTTCAGTTATAGATTAACAGTTAAAGATCAAGGCTGAATAGCACTGGGACAGGGGCCGAA  
CAGGATATCGGTGGTCAAGCACCTGGGCCCCGGCTCAGGGCCAAGAACAGATGGTTCTCAGATAAAGCGGAACAGCAAC  
AGACACAGAAGCCCCGATAGACGTCAAGTGTAGCAGAACTAGCTTCACTGATTTAGAAAAATAGAGGTGCACAGTGCTCT  
GGTCACTCCTTGAACCTGTGTGTCTGCCAATGTTCTGACCAGATATGTGCCCATTGCTGAACCTTCATTAGACTCTTTCC  
TTGTACCCCTCCCCATTTCTTGAAAATAGACATTGTTTAGATCTAAAAAGTCCCACCTCAGTTTCCCCAAATGAC  
CGGGAAGTACCCCAAACCTTATTGAACTAACCAACCAGCTCGCTTCTCGCTTCTGTAACCGCGCTTTTTGCTCCCCAGC  
CCTAGCCCTATAAAAAGGGTAAAACTCCACACTCGGCGCGCCAGTCCTCCGATAGACTGAGTCGCCCCGGGTACCCGTGTTCCCAATAAAGCCTCTTG  
TCCCAATAAAGCCTCTTGCTGTTTACATCCGAATCGTGGACTCGCTGATCCTTGGGAGGGTCTCCTCAGATTGATTGACTGCCCACCTGGGGGGGGTC  
GCCCACCTGGGGGGTCTTTTCAATTTGGAGGTCCCACCGAGATCAGGAGACCCCTGCCAGGGACACCGACCCCGCCGGG  
AGGTAAGCTGGCCAGCGGTCTGTTTCTGTCTGTCTCTGTCTCCGTGCGTGTTTGTGCCGGCATCTAATGTTTGGCGCTGC

GTCTGTACTAGTTGGCTAACTAGATCTGTATCTGGCGGTTCCGCGGAAGAACTGACGAGTTCGTATTTCCCGGCCGCGAGCC  
CCTGGGAGACGTCCCAGCGGCCTCGGGGGCCCGTTTTGTGGCCATTCTGTATCAGTTAACCTACCCGAGTCGGACTTTT  
TGGAGCTCCGCCACTGTACGTGGCTTTGTTGGGGGACGAGAGACAGAGACACTTCCCGCCCCCGTCTGGATTTTTGCTTT  
CGGTTTTACGCCGAAACCGCGCTGCGCGTCTGATTTGTTTTATTGCTCTTTTGTTCCTTCGTTAGTTTTTCTGTCTTTAA  
GTGTTTTCAAGATCATGGGACAGACCGTAACCTACCCCTCTGAGTCTAACCTTGACGACTGGGGAGATGTCCAGCGCATT  
GCATCCAACCAGTCTGTGGATGTCAGGAAGAGGCGCTGGATTACCTTCTGTTCCGCCGAATGGCCAACCTTCAATGTAGG  
ATGGCCTCAGGATGGTACTTTCAATTTAAGTATTATCTCTCAGGTTAAGTCTAGAGTGTTTTGTCTGGTCCCCACGGAC  
ACCCGGATCAGGTCCCATATATCGTTACCTGGGAGGCACTTGCCCTATGACCCCCCTCCGTGGGTCAAACCGTTTGTCTT  
CCTAAACCTCTCCCTTGCCGACAGCTCCCGTCTCCCGCCCGTCTTCTGCGCAACCTCCGTCCCGATCTGCCCTTTA  
CCCTGCCCTTACCCCTCTATAAAGTCCAAACCTCTTAAGCCCCAGGTTCTCCCTGATAGCGGCGGACCTCTCATTGACC  
TTCTCACAGAGGACCCCCCGCGTACGGAGCACAACTTCTCCTCTGCCAGAGAGAACGATGAAGAAGAGGCGGCCACC  
ACCTCCGAGGTTTTCCCCCTTCTCCCATGGCGTCTCGACTGCGGGGAAGGAGAGACCCTCCCGCAGCGGACTCCACCTC  
CTCCCAGGCATTCCCCTCCGTATGGGGGGAGATGGCCAGCTTCAGTACTGGCCGTTTTCTCCTCTGACTTATATAATT  
GGAAAAATAATAACCTTCTTTTTCTGAAGATCCAGGTAAATTGACGGCCTTGATTGAGTCCGTCTCATACCCACCAG  
CCCACCTGGGACGACTGTCAGCAGTTGTTGGGGACCCTGCTGACCGGAGAAGAAAAGCAGCGGGTGCTCCTAGAGGCTAG  
AAAGGCAGTCCGGGGCAATGATGGACGCCCCACTCAGTTGCCTAATGAAATCAATGCTGCCTTTCCCTTGAGCGCCCTG  
ATTGGGATTACACCACTACAGAAGGTAGGAACACCTAGTCCTCTATCGCCAGTTGCTCTTAGCGGGTCTCCAAAACGCG  
GGCAGAAGCCCCACCAATTTGGCCAAGGTAAAGGGATAACCCAGGGACCTAATGAGTCTCCCTCAGCCTTTTTAGAGAG  
ACTCAAGGAGGCCTATCGCAGGTACACTCCTTATGACCCTGAGGACCCAGGGCAAGAAACCAATGTGTCTATGTCATTCA  
TCTGGCAGTCTGCCCCGATATCGGGCGAAAGTTAGAGCGGTTAGAAGATTTAAAGAGCAAGACCTTAGGAGACTTAGTG  
AGGGAAGCTGAAAAGATCTTTAATAAACGAGAAACCCCGGAAGAAAGAGAGGAACGTATCAGGAGAGAAACAGAGGAAAA  
AGAAAAACGCCGTAGGGCAGAGGATGAGCAGAAAGAGAAAGAAAGGGACCGCAGAAGACATAGAGAGATGAGCAAGCTCT  
TGGCCACTGTAGTTATTGGTCAGAGACAGGATAGACAAGGGGGAGAGCGGAAGAGGCCCAACTTGATAAGGATCAATGC  
GCCTACTGCAAAGAAAAGGGACACTGGGCTAAAGACTGCCCAAAGAAGCCACGAGGGCCCCGAGGACCGAGGCCCCAGAC  
CTCCCTCCTGACCTTAGGTGACTAGAGAGGTGAGGTGAGGAGCCCCCCCCCTGAACCCAGGATAACCTCAAAGTCGGGG  
GGCAACCCGTCACCTTCTGGTAGATACTGGGGCCCAACACTCCGTGCTGACCCAAAATCCTGGACCCCTAAGTGACAAG  
TCTGCCTGGGTCCAAGGGCTACTGGAGGAAAGCGGTATCGCTGGACCAAGATCGCAAAGTGCTATAGCTACCCGTTAA  
GGTCAACCACTCTTTCTCCATGTACCAAGTCCCTATCCTCTGCTAGGAAGAAATTTGTGCTACTAACTAAAAGCCC  
AAATCCACTTTGAGGGATCAGGAGCTCAGGTTGTGGGACCAATGGGACAGCCCCTGCAAGTGCTGACCCTAAACATAGAA  
GATGAGTATCGGCTACATGAGACCTCAAAGAGCCGGATGTTTTCTCTAGGGTCCACATGGCTTTCTGATTTTTCCCGAGG  
CTGGGCGGAAACCGGGGGCATGGGACTGGCAGTTGCGCAAGCTCCTCTGATCATACCTCTGAAGGCAACCTCTACCCCG  
TGTCATATAAAACAATAACCCATGTACAAAGAAGCCAGACTGGGGATCAAGCCCCACATACAGAGACTGTTGGACCAGGGA  
ATACTGGTACCCTGCCAGTCCCCCTGGAACACGCCCCCTGCTACCCGTTAAGAAACCAGGGACTAATGATTACAGGCCTGT  
CCAAGATCTGAGAGAAGTCAACAAGCGGGTGAAGACATCCACCCACCGTGCCCAACCTTTACAACCTCTTGAGCGGGC  
TCCCACCGTCCCACAGTGGTACACTGTGCTTGACTTAAAGGATGCCTTTTTCTGCCTGAGACTCCACCCACCAAGTCAG  
CCTCTCTTCGCTTTGAGTGGAGAGACCCAGAGATGGGAATCTCAGGACAATTAACCTGGACCAGACTCCCACAGGGTTT  
CAAAAACAGTCCCACCTGTTTGATGAGGCACTGCACAGAGACCTAGCAGGCTTCCGGATCCAGCACCCAGACTTGATCC  
TGCTACAGTACGTGGATGACTTACTGCTGGCCGCCACTTCTGAGCTCGACTGCCAACAAGGTACTCGGGCCCTGTTACAA  
ACCCTAGGGGACCTCGGGTATCGGGCCTCGGCCAAGAAAGCCCAAATTTGCCAGAAACAGGTCAAGTATCTGGGGTATCT  
TCTAAAAGAGGGTCAGAGATGGCTGACTGAGGCCAGAAAAGAGACTGTGATGGGGCAGCCTATTCCGAAGACCCCTCGAC  
AACTAAGGGAGTTCTTAGGGACGGCAGGCTTCTGTGCGCTCTGGATCCCTGGGTTTGAGAAATGGCAGCCCCCTTGTA  
CCTCTCACAAAACGGGGACTCTGTTTAATTGGGGCCAGACCAGCAAAGGCCTATCAAGAAATCAAACAGGCTCTTCT  
AACTGCCCCAGCCCTGGGGTTGCCAGATTTGACTAAGCCCTTTGAACTCTTTGTGACGAAAAGCAGGGCTACGCCAAAG  
GCGTCCTAACGCAAAAACCTGGGACCTTGGCGTGGCCGGTGGCCTACCTGTCCAAAAGCTAGACCCAGTGGCAGCTGGG  
TGGCCCCCTTGCTACGGATGGTAGCAGCATTGCCGTTCTGACAAAGGATGCAGGCAAGCTAACTATGGGACAGCCGCT  
AGTCATTTCTGGCCCCCATGCGGTAAAGCACTGGTCAAACAACCCCTGACCGCTGGCTATCCAATGCTCGCATGACCC  
ACTATCAGGCAATGCTCCTAGATACGGACCGAGTTGAGTTGCGACTGGTGGTAGCCTTAAACCCGGCCACGTTGCTCCCC  
TTGCCGGGAAAAGAGACCCCCACGACTGCCTCGAGATCTTGGCTGAGACACACGGCACCCAGACCCGACCTCACGGACCA  
GCCCCCTCCCAAATGCCGACCACACCTGGTATACAGATGGAAGCAGCTTCTGACAGGAGGGGCAACGTAAGGCTGGAGCAG  
CGGTGACCACCGAGACCGAGGTAATCTGGGCCAAGGCGTTGCCAGCCGGGACATCCGCCCAGCGAGCTGAACTAATAGCA  
CTCACCCAGGCCCTAAAGATGGCAGAAGGTAAAGAAGCTAAATGTTTATACTGATAGCCGCTATGCCTTTGCTACCGCCCA  
TGTCCATGGAGAAATATATAGGAGACGTGGGTGCTCACCTCAGAAGGCAAGGAGATCAAGAACAAGGGCGAAATCTTGG  
CCTTACTGAAAGCTCTCTTTCTGCCAAAAGACTCAGTATAATTAAGTCTGCCCAGGACATCAGAAAGGCAATAGTGCTGAA  
GCTAAAGGCAACCGAATGGCGGACAGGCAGCCCGGAAGCAGCCATGGGGACTGACACAAAGGCCTCCTCACTTCTCAT  
AGAGACCTCAACCCCGTACACTCCAGACTTCTTCCATTATACTGAAACAGATATAAAGAACCTACGAGAGTTGGGAGCCA  
CATATGATAGAGAGAAAAAATATTGGGTCTGCAAGGTAAACCTGTGATGCCTGACCAGTTACCTTTGAATTATTAGAC  
TTCTTACCAGCTCACCCACCTTAGCTATCAGAAGATGAGGGCACTTCTAGACAGAAAAGAAAGCCCTATTACATGCT

AAATAAAGATAAGATCCTCCACGAGGTGGCGGAATCATGCCAAGCCTGTGTCCAAGTAAATGCCAGTAAAGCTAAGGTCG  
GTCCCGGGGTGCGAGTAAGAGGACATCGACCAGGCACCCATTGGGAAATTGACTTTACTGAAGTAAGGCCCCGACTGTAT  
GGGCATAAGTATCTTCTGGTGTTTGTGGACACGTTCTCTGGCTGGGTGGAAGCCTTCCCAACCAAGCATGAGACTGCCAA  
AGTTGTGACCAAAAAGCTTCTAGAAGAAATATTTCCAAGGTTTAGAATGCCCCAAGTATTGGGGACTGATAATGGGCCTG  
CCTTCGTCTCCCAGGTAAGTCAGTCGGTGGCCAAGCTACTGGGGATTGATTGGAAACTACATTGTGCTTACAGACCCAG  
AGTTCAGGTCAGGTAGAAAGAATGAATAGGACAATCAAGGAGACTTTGACCAAATTAACGCTTGCAACTGGCACTAGAGA  
CTGGGTACTCCTACTTCCCTTGGCCCTCTACCGAGCCCGCAACACTCCGGGCCCCCATGGACTCACTCCGTATGAAATCC  
TGTATGGGGCGCCCCGCCCCCTTGTTAATTTCCATGATCCTGAAATGTCAAAGTTTACTAATAGCCCCCTCTCTCCAAGCT  
CACTTACAGGCCCTCCAAGCAGTACAACGAGAGGTCTGGAAGCCTCTGGCCGCTGCCTATCAGGACCAACAAGACCAGCC  
TGTGATACCACACCCCTTCCGTGTCTGGCGACACCGTGTGGGTACGCCGGCACCAGACTAAGAAGTTGGAACCTCGCTGAA  
AAGGACCCTACACCGTCTGCTGACCACCCCCACCGCTCTCAAAGTAGACGGCATCGCTGCGTGGATCCACGCCGCTCAC  
GTAAAAGCGGCGACAACCCCTCCGGCCGGAACAGCATCAGGACCGACATGGAAGGTCCAGCGTTCTCAAAACCCCTTAAA  
GATAAGATTAACCCGTGGGCCCCCTGATAGTCTTGGGGATCTTAATAAGGGCAGGAGTATCAGTACCACATGACAGCCC  
TCATCAGGTCTTCAATGTTACTTGGAGAGTTACCAACTTAATGACAGGACAAACAGCTAATGCTACCTCCCTCCTGGGGA  
CAATGACCGATGCCTTTCCCAAAGTGTACTTTGACTTGTGCGATTTAATAGGGGACGACTGGGATGAGACTGGACTCGGG  
TGTGCACTCCCGGGGAAAAAAAAGGGCAAGAACATTTGACTTCTATGTTTGGCCCGGCATACTGTATCAACAGGGTG  
TGGAGGCCCGAGAGAGGGCTACTGTGGCAAATGGGGCTGTGAGACCACTGGACAGGCATACTGGAAGCCATCATCATCAT  
GGGACCTAATTTCCCTTAAGCGAGGAAACACCCCTCGGAATCAGGGCCCCCTGTTATGATTCTCAGCGGTCTCCAGTGGC  
ATCCAGGGTGCCACACCGGGGGGTGATGCAATCCCTAGTCTTAGAATTCAGTGACGCGGGTAAAAGGCCAGCTGGGA  
TGGCCCCAAAGTATGGGGACTAAGACTGTACCGATCCACAGGAACCGACCCGGTGACCCGGTTCTCTTTGACCCGCCAGG  
TCCTCAATATAGGGCCCCGCATCCCCATTGGGCCTAATCCCGTGATCACTGACCAGTTACCCCCCTCCCGACCCGTGCAG  
ATCATGCTCCCCAGGCCTCCTCAGCCTTCCCCCTACAGGCGCAGCCTCTATACAACCTGGGACGGGAGACAGACTGCTGAA  
CCTGGTAGATGGAGCCTACCAAGCACTCAACCTCACCAGTCCTGACAAAACCCAAGAGTGCTGGTTGTGTCTGGTATCGG  
GACCCCCCTATTACGAAGGGGTGCGCGTCTAGGTACCTACTCCAACCATACTCTGCCCCAGCTAACTGCTCCGTGGCC  
TCCCAACACAAGCTGACCCTGTCCGAAGTAACCGGACAGGGACTCTGCGTAGGAGCAGTTCCCAAAACCCATCAGGCCCT  
GTGTAATACCACCCAGAATACAAGCGACGGGTCTACTATCTGGCTGCTCCCGCCGGGACCATTGGGGCTTGCAACACCG  
GGCTCACTCCCTGCCTATCTACTACTGTACTCAACCTCACCACCGATTACTGTGTCTGTTGAGCTTGAGCTTGCCAAAGGTG  
ACCTACCACCTCCCCTGTTTATGTTTATGGCCAGTTTGAGAGAAAAACCAATATAAAAGAGAGCCGGTGTCTATTAACCT  
GGCCCTGCTGTTGGGAGGACTTACTATGGGCGGCATAGCCTCAGCAGCTTCATGCACTGCACTGACTGGAGTCAGTGCCC  
TAGAAAAGTCTCTGACCTCGTTGTCTGAGGTGGTCCTACAGAACCGGAGAGGATTAGATCTACTGTTCTAAAAAAGGA  
AGATTATGTGCTGCCCTAAAAGAAGAATGCTGTTTCTACGCGGACCACACTGGCGTAGTGAGAGATAGCATGGCAAAGCT  
AAGAGAAAGGTTAAACCAGAGACAAAAATTGTTTCAATCAGGACAAGGGTGGTTTGAGGGACTGTTTAAACAGGTCCCCAT  
GGTTCACGACCTTGATATCCACCATTATGGGCCCCCTTGATAATACTCTTATTAATCCTACTCTTCGGACCCCTGTATTCTC  
AACCGCTTGGTCCAGTTTGTAAAAGACAGAATTTCCGTGGTGCAGGCCCTGGTTCTGACCCAACAGTATCACCAACTCAA  
ATCAATAGGTCCAGAAAAAGTGAATCACGTGAATAAAAGATTTTATTAGTTTCCAGAAAGAGGGGGGAATGAAAGACC  
CCACCATAAGGCTTAGCAAGCTAGCTGCAGTAACGCCATTTTGCAAGGCATGAAAAAGTACCAGAGCTGGGTTCTCAAAA  
GTTACAAGGAAGTTTCAAGTTATAGATTAAAGATCAAGGCTGAATAGCACTGGGACAGGGGCCGAACAGGATATC  
GGTGGTCAAGCACCTGGGCCCCGGCTCAGGGCCAAGAACAGATGGTTCTCAGATAAAGCGGAACAGCAACAGACACAGA  
AGCCCCGATAGACGTCAAGTGTAGCAGAACTAGCTTCACTGATTTAGAAAAATAGAGGTGCACAGTGCTCTGGTCACTCC  
TTGAACCTGTGTGTCTGCCAATGTTCTGACCAGATATGTGCCATTGCTGAACCTTCATTAGACTCTTTCTTTGTACCCC  
TCCCCTACCCATTTCTTGAAAATAGACATTGTTTAGATCTAAAAAGTCCCACCTCAGTTTCCCCAAATGACCGGGAAGTA  
CCCCAAACCTTATTGAACTAACCAACCAGCTCGCTTCTCGCTTCTGTAACCGCGCTTTTTGCTCCCCAGCCCTAGCCCT  
ATAAAAAGGGTAAAAACTCCACACTCGGCGCGCCAGTCCTCCGATAGACTGAGTCGCCCGGGTACCCGTGTTCCCAATAA  
AGCCTCTTGCTGTTTACATCCGAATCGTGGACTCGCTGATCCTTGGGAGGGTCTCCTCAGATTGATTGACTGCCCACCTG  
GGGGGTCTTTCA

>Mpmv2

TGAAAGACCCCACCATAAGGCTTAGCAAGCTAGCTGTAGTAACGCCATTTTGAAGGCATGAAAAAGTACCCGAGCTGGG  
TTCTCAAAAGTTACAAGGAAGTTCAGTTATAGATTAAACAGTTAAAGATCAAGGCTGAATAGCACTGGGACAGGGGCCGAA  
CAGGATATCGGTGATCAAGCACCTGGGCCCCGGCTCAGGGCCAAGAACAGATGGTTCTCAGATAAAGCGGAACAGCAAC  
AGACACAGAAGCCCCGATAGACGTCAAGTGTAGCAGAACTAGCTTCACTGATTTAGAAAAATAGAGGTGCACAGTGCTCT  
GGTCACTCCTTGAACCTGTGTGTCTGCCAATGTTCTGACCAGATATGTGCCATTGCTGAACCTTCATTAGACTCTTTCC  
TTGTACCCCTCCCCTACCCATTTCTTGAAAATAGACATTGTTTAGATCTAAAAAGTCCCACCTCAGTTTCCCCAAATGAC  
CGGGAAGTACCCCAAACCTTATTGAACTAACCAACCAGCTCGCTTCTCGCTTCTGTAACCGCGCTTTTTGCTCCCCAGC  
CCTAGCCCTATAAAAAGGGTAAAAACTCCACACTCGGCGCGCCAGTCCTCCGATAGACTGAGTCGCCCGGGTACCCGTGT  
TCCCAATAAAGCCTCTTGCTGTTTACATCCGAATCGTGGACTCGCTGATCCTTGGGAGGGTCTCCTCAGATTGATTGACT  
GCCACCTGGGGGGGGTCTTTCAATTTGGAGGTTCCACCGAGATCAGGAGACCCCTGCCAGGGACCACCGACCCCGCCG  
GGAGGTAAGCTGGCCAGCGGTCTTTTCGTGTCTGTCTCTGTCTCCGTGCGTGTTTGTGCCGGCATCTAATGTTTGC

GCGTCTGTACTAGTTGGCTAACTAGATCTGTATCTGGCGGTTCCGCGGAAGAACTGACGAGTTCTGTATTTCCCGGCCGCGAG  
CCCCTGGGAGACGTCCCAGCGGCCTCGGGGGCCCGTTTTGTGGCCATTCTGTATCAGTTAACCTACCCGAGTCGGACTT  
TTTGGAGCTCCGCCACTGTACGTGGCTTTGTTGGGGGACGAGAGACAGAGACACTTCCCGCCCCCGTCTGGATTTTTGCT  
TTCGGTTTTACGCCGAAACCGCGCTGCGCGTCTGATTTGTTTTATTGCTCTTTTGTTCCTCGTTAGTTTTTCTGTCTTT  
AAGTGTTCATAGATCATGGGACAGACCGTAACCTACCCCTCTGAGTCTAACCTTGACGACTGGGGAGATGTCCAGCGCA  
TTGCATCCAACCAGTCTGTGGATGTCAGGAAGAGGCGCTGGATTACCTTCTGTTCCGCCGAATGGCCAACCTTCAATGTA  
GGATGGCCTCAGGATGGTACTTTCAATTTAAGTATTATCTCTCAGGTTAAGTCTAGAGTGTTTTGTCTGGTCCCCACGG  
ACACCCGGATCAGGTCCCATATATCGTTACCTGGGAGGCACTTGCCCTATGACCCCCCTCCGTGGGTCAAACCGTTTGT  
CTCCTAAACCTCTCCCTTGGCGACAGCTCCCGTCTCCCGCCCGTCTTCTGCGCAACCTCCGTCCCGATCTGCCCTT  
TACCTTGCCCTTACCCCTCTATAAAGTCCAAACCTCTTAAGCCCCAGGTTCTCCCTGATAGCGGCGGACCTCTCATTGA  
CCTTCTCACAGAGGACCCCCCGCGGTACGGAGACAACCTTCTCCTCTGCCAGAGAGAACGATGAAGAAGAGGCGGCCA  
CCACCTCCGAGGTTTTCCCCCCTTCTCCATGGCGTCTCGACTGCGGGGAAGGAGAGACCCTCCCGCAGCGGACTCCACC  
TCCTCCCAGGCATTCCCCTCCGTATGGGGGGAGATGGCCAGCTTCAGTACTGGCCGTTTTCTCCTCTGACTTATATAA  
TTGGAATAATAAACCTTCTTTTTCTGAAGATCCAGGTAAATTGACGGCCTTGATTGAGTCCGTCTCATACCCACC  
AGCCACCTGGGACGACTGTCAGCAGTTGTTGGGGACCCTGCTGACCGGAGAAGAAAAGCAGCGGGTGCTCCTAGAGGCT  
AGAAAGGCAGTCCGGGGCAATGATGGACGCCCCACTCAGTTGCCTAATGAAATCAATGCTGCCTTTCCCTTGAGCGCCC  
TGATTGGGATTACACCACTACAGAAGGTAGGAACCACCTAGTCCTCTATCGCCAGTTGCTCTTAGCGGGTCTCCAAAACG  
CGGGCAGAAGCCCCACCAATTTGGCCAAGGTAAAGGGATAACCCAGGGACCTAATGAGTCTCCCTCAGCCTTTTTAGAG  
AGACTCAAGGAGGCCTATCGCAGGTACACTCCTTATGACCCTGAGGACCCAGGGCAAGAAACCAATGTGTCTATGTCATT  
CATCTGGCAGTCTGCCCCGATATCGGGCGAAAGTTAGAGCGGTTAGAAGATTTAAAGAGCAAGACCTTAGGAGACTTAG  
TGAGGGAAGCTGAAAAGATCTTTAATAGACGAGAAACCCGGAAGAAAGAGAGGAACGTATCAGGAGAGAAACAGAGGAA  
AAAGAAGAACGCCGTAGGGCAGAGGATGAGCAGAAAGAGAAAGAAAGGGACCGCAGAAGACATAGAGAGATGAGCAAGCT  
CTTGGCCACTGTAGTTATTGGTCAGAGACAGGATAGACAGGGGGGAGAGCGGAAGAGGCCCAACTTGATAAGGATCAAT  
GCGCCTACTGCAAAGAAAAGGGACACTGGGCTAAAGACTGCCCAAAGAAGCCACGAGGGCCCCGAGGACCGAGGCCCCAG  
ACCTCCCTCCTGACCTTAGGTGACTAGGGAGGTGAGGTGAGGAGCCCCCCCCCTGAACCCAGGATAACCCCTCAAAGTCGG  
GGGGCAACCCGTCACCTTCTGGTGGATACTGGGGCCCAACACTCCGTGCTGACCCAAAATCCTGGACCCCTAAGTGACA  
AGTCTGCCTGGGTCCAAGGGCTACTGGAGGAAGCGGTATCGCTGGACACGGATCGCAAAGTGCATCTAGACTACCGGT  
AAGTCAACCACTCTTTCTCCATGTACAGACTGCCCTATCCTCTGCTAGGAAGAGATTTGTGCTACTAACTAAAAGC  
CCAAATCCACTTTGAGGATCAGGAGCTCAGGTTGTGGGACCAATGGGACAGCCCCCTGCAAGTGCTGACCCTAAACATAA  
AAGATGAGTATCGGCTACATGAGACCTCAAAGAGCCGGATGTTTTCTCTAGGGTCCACATGGCTTTCTGATTTTCCCCAG  
GCCTGGGCGGAAACCGGGGGCATGGGACTGGCAGTTCGCCAAGCTCCTCTGATCATACCTCTGAAGGCAACCTCTACCCC  
CGTGTCCATAAAACAATACCCCATGTACAAGAAGCCAGACTGGGGATCAAGCCCCACATACAGAGACTGTTGGACCAGG  
GAATACTGGTACCCTGCCAGTCCCCCTGGAACACGCCCCCTGCTACCCGTTAAGAAACCAGGGACTAATGATTACAGGCCT  
GTCCAAGATCTGAGAGAAGTCAACAAGCGGGTGAAGACATCCACCCACCGTGCCCAACCTTTACAACCTCTTGAGCGG  
GCTCCACCGTCCACCACTGGTACACTGTGCTTGACTTAAAGGATGCCTTTTTCTGCCTGAGACTCCACCCACCACTC  
AGCCTCTCTTCGCTTTGAGTGGAGAGACCCAGAGATGGGAATCTCAGGACAATTAACCTGGACCAGACTCCACAGGGT  
TTCAAAAACAGTCCCACCTGTTTGATGAGGCACTGCACAGAGACCTAGCAGGCTTCCGGATCCAGCACCCAGACTTGAT  
CCTGCTACAGTACGTGGATGACTTACTGCTGGCCGCCACTTCTGAGCTCGACTGCCAACAAGGTACTCGGGCCCTGTTAC  
AAACCTTAGGGGACCTCGGGTATCGGGCCTCGGCCAAGAAAGCCCAAATTTGCCAGAAACAGGTCAAGTATCTGGGGTAT  
CTTCTAAAAGAGGGTCAGAGATGGCTGACTGAGGCCAGAAAAGAGACTGTGATGGGGCAGCCTATTCCGAAGACCCCTCG  
ACAATAAGGGAGTTCTTAGGGACGGCAGGCTTCTGTGCGCTCTGGATCCCTGGGTTTGAGAAATGGCAGCCCCCTTGT  
ATCCTCTCACAAAACGGGGACTCTGTTTAATTGGGGCCAGACCAGCAAAAGGCCTATCAAGAAATCAAACAGGCTCTT  
CTAACTGCCCCAGCCCTGGGGTTGCCAGATTTGACTAAGCCCTTTGAACTCTTTGTGACGAGAAGCAGGGCTACGCCAA  
AGGCGTCTTAACGCAAAAACCTGGGACCTTGGCGTGGCCGGTGGCCTACCTGTCCAAAAGCTAGACCCAGTGGCAGCTG  
GGTGGCCCCCTTGCTACGGATGGTAGCAGCATTGCCGTTCTGACAAAGGATGCAGGCAAGCTAACTATGGGACAGCCG  
CTAGTCATTCTGGCCCCCATGCGGTAGAAGCACTGGTCAAACAACCCCTGACCGCTGGCTATCCAATGCTCGCATGAC  
CCACTATCAGGCAATGCTCCTAGATACGGACCGAGTTCAGTTGCGACCGGTGGTAGCCTTAAACCCGGCCACGTTGCTCC  
CCTTGCCGGGAAAAGAGACCCCCACGACTGCCTCGAGATCTTGGCTGAGACACACGGCACCCAGACCGGACCTCACGGAC  
CAGCCCCCTCCCAAATGCCGACCACACCTGGTATACAGATGGAAGCAGCTTCTGACGAGGGGGCAACGTAAGGCTGGAGC  
AGCGGTGACCACCGAGACCGAGGTAATCTGGGCCAAGGCGTTGCCAGCCGGGACATCCGCCCAGCGAGCTGAACATAATAG  
CACTACCCAGGCCCTAAAGATGGCAGAAGGTAAAAAGCTAAATGTTTATACTGATAGCCGCTATGCCTTTGCTACCGCC  
CATGTCCATGGAGAAATATATAGGAGACGTGGGTGCTCACCTCAGAAGGCAAGGAGATCAAGAACAAGGGCGAAATCTT  
GGCCTTACTGAAAGCTCTCTTTCTGCCAAAAGACTCAGTATAATTAAGTCCCAGGACATCAGAAAGGCAATAGTGCTG  
AAGCTAAAGGCAACCGAATGGCGGACCAGGCAGCCCGGAAGCAGCCATGGGGACTGACACAAAGGCCTCCTCACTTCTC  
ATAGAGACCTCAACCCCGTACACTCCAGACTTCTTCCATTATACTGAAACAGATATAAAGAACCTACGAGAGTTGGGAGC  
CACATATGATAGAGAGAAAAAATATTGGGTCTGCAAGGTAAACCTGTGATGCCTGACCAGTTCACCTTTGAATTATTAG  
ACTTCCTTACCAGCTCACCCACCTTAGCTATCAGAAGATGAGGGCACTTCTAGACAGAAAAGAAAGCCCCCTATTACATG

CTAAATAAAGATAAGATCCTCCACGAGGTGGCGGAATCATGCCAAGCCTGTGTCCAAGTAAATGCCAGTAAAGCTAAGGT  
CGGTCCCGGGGTGCGAGTAAGAGGACATCGACCAGGCACCCATTGGGAAATTGACTTTACTGAAGTAAGGCCCGGACTGT  
ATGGGCATAAGTATCTTCTGGTGTGTTGTGGACACGTTCTCTGGCTGGGTGGAAGCCTTCCCAACCAAGCATGAGACTGCC  
AAAGTTGTGACCAAAAAGCTTCTAGAAGAAATATTTCCAAGTTTTGGAATGCCCCAAGTATTGGGGACTGATAATGGGCC  
TGCCTTCGTCTCCCAGGTAAGTCAGTCGGTGGCCAAGCTACTGGGGATTGATTGGAAACTACATTGTGCTTACAGACCCC  
AGAGTTCAGGTCAGGTAGAAAGAATGAATAGGACAATCAAGGAGACTTTGACCAAATTAACGCTTGCAACTGGCACTAGA  
GACTGGGTACTCCTACTTCCCTTGGCCCTCTACCGAGCCCGCAACACTCCGGGCCCCCATGGACTCACTCCGTATGAAAT  
CCTGTATGGGGCGCCCCGCCCCCTTGTTAATTTCCATGATCCTGAAATGTCAAAGTTTACTAATAGCCCCCTCTCTCCAAG  
CTCACTTACAGGCCCTCCAAGCGGTACAACGAGAGGTCTGGAAGCCTCTGGCCGCTGCCTATCAGGACCAACAAGACCAG  
CCTGTGATACCACACCCCTTCCGTGTCTGGCGACACCGTGTGGGTACGCCGGCACCAGACTAAGAACTTGAACCTCGCTG  
GAAAGGACCCTACACCGTCTGTGACCACCCCCACCGCTCTCAAAGTAGACGGCATCGCTGCGTGGATCCACGCCGCTC  
ACGTAAAAGCGGCGACAACCCCTCCGGCCGGAACAGCATCAGGACCGACATGGAAGGTCCAGCGTTCTCAAAACCCCTTTA  
AAGATAAGATTAACCCGTGGGCCCCCTGATAGTCCTGGGGATCTTAATAAGGGCAGGAGTATCAGTACCACATGACAGC  
CCTCATCAGGTCTTCAATGTTACTTGGAGAGTTACCAACTTAATGACAGGACAAACAGCTAATGCTACCTCCCTCCTGGG  
GACAATGACCGATGCCTTTCCCAAATGTACTTTGACTTGTGCGACTTAATAGGGGACGACTGGGATGAGACTGGACTCG  
GGTGTGCGACTCCCGGGGAAGAAAAAGGGCAAGAACATTTGACTTCTATGTTTGCCCCGGGCATACTGTACCAACAGGG  
TGTGGAGGCCCGAGAGAGGGCTACTGTGGCAAATGGGGCTGTGAGACCACTGGACAGGCATACTGGAAGCCATCATCATC  
ATGGGACCTAATTTCCCTTAAGCGAGGAAACACCCCTCGGAATCAGGGCCCCCTGTTATGATTCTCAGCGGTCTCCAGTG  
GCATCCAGGGTGCCACACCGGGGGGTGATGCAATCCCCTAGTCCTAGAATTCAGTGACGCGGGTAAAAAGGCCAGCTGG  
GATGGCCCCAAAGTATGGGGACTAAGACTGTACCGATCCACAGGAACCGACCCGGTGACCCGGTTCTCTTTGACCCGCCA  
GGTCCTCAATATAGGGCCCCGCATCCCCATTGGGCCTAATCCCCTGATCACTGACCAGTTACCCCCCTCCCGACCCGTGC  
AGATCATGCTCCCCAGGCCTCCTCAGCCTTCCCCCTACAGGCGCAGCCTCTATACAACCTGGGACGGGAGACAGACTGCTG  
AACCTGGTAGATGGAGCCTACCAAGCACTCAACCTCACCAGTCCTGACAAAACCCAAGAGTGCTGGTTGTGTCTGGTATC  
GGGACCCCCCTATTACGAAGGGGTGCGCGTCTAGGTACCTACTCCAACCATACTCTGCCCCAGCTAACTGCTCCGTGG  
CCTCCCAACACAAGCTGACCCTGTCCGAAGTAACCGGACAGGGACTCTGCGTAGGAGCAGTTCCCAAAACCCATCAGGCC  
CTGTGTAATACCACCCAGAATACAAGCGACGGGTCTACTATCTGGCTGCTCCCGCCGGGACCATTGTTGGCTTGCAACAC  
CGGGCTCACTCCCTCGCTATCTACTACTGTACTCAACCTCACCACCGATTACTGTGTCTGGTTGAGCTCTGGCCAAAGG  
TGACCTACCACCTCCCCTGGTTATGTTTATGGCCAGTTTGAGAGAAAAACCAATATAAAGAGAGACGGGTGTCTTAATCT  
CTGGCCCTGCTGTTGGGAGGACTTACTATGGCGGCTGTCAGGAGTAGGAACAGGGACTACAGCCCTAGTGGCCAC  
CAAGCAATTCGAGCAGCTCCAGGCAGCCATACATACAGACCTTGGGGCCTTAGAAAAATCAGTCAGTGCCCTAGAAAAGT  
CTCTGACCTCGTTGTCTGAGGTGGTCCTACAGAACCGGAGAGGATTAGATCTACTGTTTCTAAAAGAAGGAGGATTATGT  
GCTGCCCTAAAAGAAGAATGCTGTTTCTACGCGGACCACACTGGCGTAGTGAGAGATAGCATGGCAAAGCTAAGAGAAAG  
GTTAAACCAGAGACAAAAATTGTTTGAATCAGGACAAGGGTGGTTTGAGGGACTGTTTAAACAGGTCCCCATGGTTACGA  
CCTTGATATCCACCATTATGGGCCCTTGATAATACTCTTATTAATCCTACTCTTCGGACCCCTGTATTCTCAACCGCTTG  
GTCCAGTTTGTAAAAGACAGAATTTGCGTGGTGCAGACCCTGGTTCTGACCCAACAGTATCATCAACTCAAATCAATAGG  
TCCAGAAGAAGTGGAATCACGTGAATAAAAGATTTTATTAGTTTCCAGAAAGAGGGGGGAATGAAAGACCCCAACATAA  
GGCTTAGCAAGCTAGCTGTAGTAACGCCATTTTGAAGGCATGAAAAAGTACCCGAGCTGGGTTCTCAAAAGTTACAAGG  
AAGTTTCAATTATAGATTAACAGTTAAAGATCAAGGCTGAATAGCACTGGGACAGGGGCCGAACAGGATATCGGTGATCAA  
GCACCTGGGCCCCGGCTCAGGGCCAAGAACAGATGGTTCTCAGATAAAGCGGAACCAGCAACAGACACAGAAGCCCCGAT  
AGACGTCAGTGTTAGCAGAACTAGCTTCACTGATTTAGAAAAATAGAGGTGCACAGTGCTCTGGTCACTCCTTGAACCTG  
TGTGTCTGCCAATGTTCTGACCAGATATGTGCCATTGCTGAACCTTCATTAGACTCTTTTCTTGTACCCCTCCCCCTACC  
CATTTCTTGAAAATAGACATTGTTTATAGATCTAAAAAGTCCCACCTCAGTTTCCCCAAATGACCGGGAAGTACCCCAAACC  
TTATTGAACTAACCAACCAGCTCGCTTCTCGCTTCTGTAACCGCGCTTTTTGCTCCCCAGCCCTAGCCCTATAAAAAGG  
GTAAAAACTCCACACTCGGCGCGCCAGTCTCCGATAGACTGAGTCGCCCCGGGTACCCGTGTTCCCAATAAAGCCTCTTG  
CTGTTTACATCCGAATCGTAGGACTCGCTGATCCTGGGAGGCTCTCAGTCAGATTGATTGACTGCCCACCTGGGGGGGGTC  
TTTCA

>Mpmv3

TGAAAGACCCCAACATAAGGCTTAGCAAGCTAGCTGCAGTAACGCCATTTTGAAGGCATGAAAAAGTACCAGAGCTGGG  
TTCTCAAAAGTTACAAGGAAGTTCAGTTATAGATTAACAGTTAAAGATCAAGGCTGAATAGCACTGGGACAGGGGCCGA  
CAGGATATCGGTGGTCAAGCACCTGGGCCCCGGCTCAGGGCCAAGAACAGATGGTTCTCAGATAAAGCGGAACCAGCAAC  
AGACACAGAAGCCCCGATAGACGTCAGTGTTAGCAGAACTAGCTTCACTGATTTAGAAAAATAGAGGTGCACAGTGCTCT  
GGTCACTCCTTAAACCTGTGTGTCTGCCAATGTTCTGACCAGATATGTGCCATTGCTGAACCTTCATTAGACTCTTTCC  
TTGTACCCCTCCCCTACCCATTTCTAGAAAATAGACATTGTTTATAGATCTAAAAAGTCCCACCTCAGTTTCCCCAAATGAC  
CGGGAAGTACCCCAAACCTTATTGAACTAACCAACCAGCTCGCTTCTCGCTTCTGTAACCGCGCTTTTTGCTCCCCAGC  
CCTAGCCCTATAAAAAGAGTAAAACTCCACACTCGGCGCGCCAGTCTCCGATAGACTGAGTCGCCCCGGGTACCCGTGTTCCCAATAAAGCCTCTTG  
TCCCAATAAAGCCTCTTGCTGTTTACATCCGAATCGTGGACTCGCTGATCCTTGGGAGGGTCTCCTCAGATTGATTGACT  
GCCACCTGGGGGGTCTTTTCAATTTGGAGGTCCCACCGAGATCAGGAGACCCCTGCCAGGGACCACCGACCCCCCGCGGG

AGGTAAGCTGGCCAGCGGTCGTTTTCGTGTCTGTCTCTGTCTCCGTGCGTGTTTTGTGCCGGCATCTAATGTTTTGCGCCTGC  
GTCTGTACTAGTTGGCTAACTAGATCTGTATCTGGCGGTTCCGCGGAAGAACTGACGAGTTTCGTATTTCCCGGCCGAGCC  
CCTGGGAGACGTCCCAGCGGCCTCGGGGGCCCGTTTTGTGGCCATTCTGTATCAGTTAACTTACCCGAGTCGGACTTTTT  
TGGAGCTCCGCCACTGTACGTGGCTTTGTTGGGGGACGAGAGACAGAGACACTTCCCGCCCCCGTCTGGATTTTTGCTTT  
CGGTTTTACGCCGAAACCGCGCTGCGCGTCTGATTTGTTTTATTGCTCTTTTGTTCTTCGTTAGTTTTTCTGTCTTTAA  
GTGTTTTCAAGATCATGGGACAGACCGTAACCTACCCCTCTGAGTCTAACCTTGACGACTGGGGAGATGTCCAGCGCATT  
GCATCCAACCAGTCTGTGGATGTCAGGAAGAGGCGCTGGATTACCTTCTGTTCCGCCGAATGGCCAACCTTCAATGTAGG  
ATGGCCTCAGGATGGTACTTTCAATTTAAGTATTATCTCTCAGGTTAAGTCTAGAGTGTTTTGTCTGGTCCCCACGGAC  
ACCCGGATCAGGTCCCATATATCGTTACCTGGGAGGCACTTGCCCTATGACCCCCCTCCGTGGGTCAAACCGTTTGTCTTCT  
CCTAAACCTCCTCCCTTGGCGACAGCTCCCGTCTCCCGCCCGGTCTTCTGCGCAACCTCCGTCCGATCTGCCCTTTA  
CCCTGCCCTTACCCCTCTATAAAGTCCAACCTCCTAAGCCCCAGGTTCTCCCTGATAGCGGCGGACCTCTCATTGATC  
TTCTCACAGAGGACCCCCCGCCGTACGGAGCACAACTTCTCTCTGCCAGAGAGAACGATGAAAAAGAGGCGGCCAC  
CACCTCCGAGGTTTTCCCCCTTCTCCCATGGCGTCTCGACTGCGGGGAAGGAGAGACCTCCCGCAGCGGACTCCACCT  
CCTCCCAGGCATTCCCACTCCGTATGGGGGGAGATGGCCAGCTTCAGTACTGGCCGTTTTCTCTCTGACTTATATAAT  
TGGAAAAATAATAACCTCCCTTTTTCTGAAGATCCAGGTAAATTGACGGCCTTGATTGAGTCCGTCTCATCCCCACCA  
GCCCACCTGGGACGACTGTGACGAGTTGTTGGGGACCTGCTGACCGGAGAAGAAAAGCAGCGGTGCTCCTAGAGGCTA  
GAAAGGCAGTCCGGGGCAATGATGGACGCCCCACTCAGTTGCCTAATGAAATCAATGCTGCCTTTCCCTTGAGCGCCCT  
GATTGGGATTACACCACTACAGAAGGTAGGAACCACCTAGTCTCTATCGCCAGTTGCTCTTAGCGGGTCTCCAAAACGC  
GGGCAGAAGCCCCACCAATTTGGCCAAGGTAAAAGGGATAACCCAGGGACCTAATGAGTCTCCCTCAGCCTTTTTAGAGA  
GACTCAAGGAGGCCTATCGCAGGTACACTCCTTATGACCCTGAGGACCCAGGGCAAGAAACCAATGTGTCTATGTCATT  
ATCTGGCAGTCTGCCCCGATATCGGGCGAAAGTTAGAGCGGTTAGAAGATTTAAAGAGCAAGACCTTAGGAGACTTAGT  
GAGGGAAGCTAAAAAGATCTTTAATAAACGAGAAACCCCGGAAGAAAGAGAGGAACGTATCAGGAGAGAAACAGAGGAAA  
AAGAAGAACGCCGTAGGGCAGAGGATGAGCAGAAAGAGAAAGAAAGGGACCGCAGAAGACATAGAGAGATGAGCAAGCTC  
TTGGCCACTGTAGTTATTGGTCAGAGACAGGATAGACAGGGGGGAGAGCGGAAGAGGCCCACTTGATAAGGATCAATG  
CGCCTACTGCAAAGAAAAGGGACACTGGGCTAAAGACTGCCCAAAGAAGCCACGAGGGCCCCGAGGACCGAGGCCCCAGA  
CCTCCCTCCTGACCTTAGGTGACTAGGGAGGTGAGGTCAGGAGCCCCCCCCCTGAACCCAGGATAACCTCAAAGTCGGG  
GGGCAACCCCTCACCTTCTGGTAGATACTGGGGCCCAACACTCCGTGCTGACCCAAAATCTGGACCCCTAAGTGACAA  
GTCTGCCTGGGTCCAAGGGGCTACTGGAGGAAGCGGTATCGCTGGACCAGGATCGCAAAGCTGACCTAGCTACCGGTGTA  
AGGTACCCACTCTTTCTCCATGTACCAGACTGCCCTATCCTCTGCTAGGAAGAGATTTGCTGACTAAACTAAAAGCC  
CAAATCCACTTTGAGGGATCAGGAGCTCAGGTTGTGGGACCAATGGGACAGCCCTGCAAGTGCTGACCTAAACATAGA  
AGATGAGTATCGGCTACATGAGACCTCAAAAGAGCCGGATGTTTTCTCTAGGGTCCACATGGCTTTCTGATTTTTCCCCAGG  
CCTGGGCGGAAACCGGGGCATGGGACTGGCAGTTCGCCAAGCTCCTCTGATCATACCTCTGAAGGCAACCTCTACCCCC  
GTGTCCATAAAACAATACCCCATGTACAGAAGCCAGACTGGGGATCAAGCCCCACATACAGAGACTGTTGGACCAGGG  
AATACTGGTACCCTGCCAGTCCCCCTGGAACACGCCCCCTGCTACCCGTTAAGAAACCAGGGACTAATGATTACAGGCCTG  
TCCAAGATCTGAGAGAAGTCAACAAGCGGGTGAAGACATCCACCCACCGTGCCCAACCTTACAACCTCTTGAGCGGG  
CTCCCACCGTCCCACCACTGGTACACTGTGCTTGACTTAAAGGATGCCTTTTTCTGCCTGAGACTCCACCCACCACTCA  
GCCTCTCTTCGCCTTTGAGTGGAGAGACCCAGAGATGGGAATCTCAGGACAATTAACCTGGACCAGACTCCACAGGGTT  
TCAAAAACAGTCCCACCTGTTTGATGAGGCACTGCACAGAGACCTAGCAGGCTTCCGGATCCAGCACCCAGACTTGATC  
CTGCTACAGTACGTGGATGACTTACTGCTGGCCGCCACTTCTGAGCTCGACTGCCAACAAGGTAAGTCTGGGCCCCGTTACA  
AACCTTAGGGGACCTCGGGTATCGGGCCTCGGCCAAGAAAGCCCAATTTGCCAGAAACAGGTCAAGTATCTGGGGTATC  
TTCTAAAAGAGGGTCAGAGATGGCTGACTGAGGCCAGAAAAGAGACTGTGATGGGGCAGCCTATTCCGAAGACCCCTCGA  
CAACTAAGGGAGTTCTTAGGGACGGCAGGCTTCTGTGCCTCTGGATCCCTGGGTTTGAGAGAAATGGCAGCCCCCTTGTA  
CCCTCTCACAAAACGGGGACTCTGTTTAATTGGGGCCAGACCAGCAAAAGGCCTATCAAGAAATCAAACAGGCTCTTC  
TAACTGCCCCAGCCCTGGGGTTGCCAGATTTGACTAAGCCCTTTGAACTCTTTGTGACGAGAGAAGCAGGGCTACGCCAAA  
GGCGTCTTAACGCAAAAAGCTGGGACCTTGGCGTCGGCCGGTGGCCTACCTGTCCAAAAGCTAGACCCAGTGGCAGCTGG  
GTGGCCCCCTTGCCCTACGGATGGTAGCAGTCATTGCCGTTCTGACAAAGGATGCAGGCAAGCTAAGTATGGGACAGCCGC  
TAGTCATTCTGGCCCCCATGCGGTAGAAGCACTGGTCAAACAACCCCTGACCGCTGGCTATCCAATGCTCGCATGACC  
CACTATCAGGCAATGCTCCTAGATACGGACCGAGTTTCAAGTTCGGACCGGTGGTAGCCTTAAACCCGGCCACGTTGCTCCC  
CTTGCCGGGAAAAGAGACCCCCCACGACTGCCTCGAGATCTTGGCTGAGACACACGGCACAGACCGGACCTCACGGACC  
AGCCCCCTCCCAATGCCGACCACACCTGGTATACAGATGGAAGCAGCTTCTGCGAGGAGGGCAACGTAAGGCTGGAGCA  
GCGGTGACCACCGAGACCGAGGTAATCTGGGCCAAGGCGTTGCCAGCCGGGACATCCGCCAGCGAGCTGAACTAATAGC  
ACTCACCCAGGCCCTAAAGATGGCAGAAGGTAAGAAGCTAAATGTTTTATACTGATAGCCGCTATGCCTTTGCTACCGCCC  
ATGTCCATGGAGAAATATATAGGAGACGTGGGTTGCTCACCTCAGAAGGCAAGGAGATCAAGAACAAGGGCGAAATCTTG  
GCCTTACTGAAAGCTCTCTTTCTGCCAAAAGACTCAGTATAATTCAGTCCCAGGACATCAGAAAGGCAATAGTGCTGA  
AGCTAAAGGCAACCGAATGGCGGACAGGCAGCCCGGGAAGCAGCCATGGGGACTGACACAAAGGCCTCCTCATTTCTCA  
TAGAGACCTCAACCCGTACACTCCAGACTTCTTCCATTATACTGAAACAGATATAAAGAACCTACGAGAGTTGGGAGCC  
ACATATGATAGAGAGAAAAATATTGGGTCCTGCAAGGTAAACCTGTGATGCCTGACCAGTTCACCTTTGAATTATTAGA

CTTCCTTCACCAGCTCACCCACCTTAGCTATCAGAAGATGAGGGCACTTCTAGACAGAAAAGAAAGCCCCCTATTACATGC  
TAAATAAAGATAAGATCCTCCACGAGGTGGCGGAATCATGCCAAGCCTGTGTCCAAGTAAATGCCAGTAAAGCTAAGGTC  
GGTCCCGGGGTGCGAGTAAGAGGACATCGACCAGGCACCCATTGGGAAATTGACTTTACTGAAGTAAGGCCCCGACTGTA  
TGGGCATAAGTATCTTCTGGTGTGTTGTGGACACGTTCTCTGGCTGGGTGGAAGCCTTCCCAACCAAGCATGAGACTGCCA  
AAGTTGTGACCAAAAAGCTTCTAGAAGAAATATTTCCAAGGTTTGGAATGCCCCAAGTATTGGGGACTGATAATGGGCCT  
GCCTTCGTCTCCCAGGTAAGTCAGTCGGTGGCCAAGCTACTGGGGATTGATTGGAAACTACATTGTGCTTACAGACCCCCA  
GAGTTTCAGGTCAGGTAGAAAAGAAATGAATAGGACAATCAAGGAGACTTTGACCAAATTAACGCTTGCAACTGGCACTAGAG  
ACTGGGTACTCCTACTTCCCTTGGCCCTCTACCGAGCCCGCAACACTCCGGGCCCCCATGGACTCACTCCGTATGAAATC  
CTGTATGGGGCGCCCCCGCCCTTGTAAATTTCCATGATCCTGAAATGTCAAAGTTTACTAATAGCCCCCTCTCTCCAAGC  
TCACCTTACAGGCCCTCCAAGCAGTACAACGAGAGGTCTGGAAGCCTCTGGCCGCTGCCTATCAGGACCAACAAGACCAGC  
CTGTAATACCACACCCCTTCCGTGTGCGCGACACCGTGTGGGTACGCCGGCACCAGACTAAGAAGTTGGAACCTCGCTGG  
AAAGGACCCTACACCGTCCTGCTGACCACCCCCACCGCTCTCAAAGTAGACGGCATCGCTGCGTGGATCCACGCCGCTCA  
CGTAAAGCGGCGACAACCCCTCCGGCCGGAACAGCATCAGGACCGACATGGAAGGTCCAGCGTTCTCAAACCCCTTAA  
AGATAAGATTAACCCGTGGGCCCCCTGATAGTCCTGGGGATCTTAATAAGGGCAGGAGTATCAGTACCACATGACAGCC  
CTCATCAGGTCTTCAATGTTACTTGGAGAGTTACCAACTTAATGACAGGACAAACAGCTAATGCTACCTCCCTCCTGGGG  
ACAATGACCGATGCCTTTCCCAAAGTGTACTTTGACTTGTGCGATTTAATAGGGGACGACTGGGATGAGACTGGACTCGG  
GTGTGCGACTCCCGGGGGAAGAAAAGGGCGAGAACATTTGACTTCTATGTTTGCCCCGGGCATACTGTACCAACAGGGT  
GTGGAGGCCCCGAGAGAGGGCTACTGTGGCAAATGGGGCTGTGAGACCACTGGACAGGCATACTGGAAGCCATCATCATCA  
TGGGACCTAATTTCCCTTAAGCGAGGAAACACCCCTCGGAATCAGGGCCCCGTGTTATGATTCTCAGCGGTCTCCAGTGG  
CATCCAGGGTGCCACACCGGGGGGTGATGCAATCCCCTAGTCCTAGAATTCAGTGACGCGGGTAAAAAGGCCAGCTGGG  
ATGGCCCCAAAGTATGGGGACTAAGACTGTACCGATCCACAGGAACCGACCCGGTGACCCGGTTCTCTTTGACCCGCCAG  
GTCCTCAATATAGGGCCCCGCATCCCCATTGGGCCTAATCCCGTGATCACTGACCAGTTACCCCCCTCCCGACCCGTGCA  
GATCATGCTCCCCAGGCCTCCTCAGCCTTCCCCCTACAGGCGCAGCCTCTATACAACCTGGGACGGGAGACAGACTGCTGA  
ACCTGGTAGATGGAGCCTACCAAGCACTCAACCTCACCAGTCCTGACAAAACCCAAGAGTGCTGGTTGTGTCTGGTATCG  
GGACCCCCCTATTACGAAGGGGTGCGCTCCTAGGTACCTACTCCAACCATACTCTGCCCCAGCTAACTGCTCCGTGGC  
CTCCCAACACAAGCTGACCCCTGTCCGAAGTAACCGGACAGGGACTCTGCGTAGGAGCAGTTCCCAAAACCCATCAGGCCC  
TGTGTAATACCACCCAGAATACAAGCGACGGTCTCTACTGTGCTGCTCCCGCCGGGACATTTGGGCTTGCAACACC  
GGGCTCACTCCCTGCCTATCTACTGTACTCAACCTCACCACCGATTACTGTGTCTGCTGGTTGAGCTCTGGCCAAAGGT  
GACCTACCCTCCCTGGTTATGTTTATGGCCAGTTTGAGAGAAAAATCAAATATAAAAGAGAGCCGGTGTCACTAACTC  
TGGCCCTGCTGTTGGGAGGACTTACTATGGGCGGCATAGCTGCAGGAGTAGGAACAGGGACTACAGCCCTAGTGGCCACC  
AAGCAATTCGAGCAGCTCCAGGCAGCCATACATACAGACCTTGGGGCCTTAGAAAAATCAGTCAGTGCCCTAGAAAAGTC  
TCTGACCTCGTTGTCTGAGGTGGTCCTACAGAACCGGAGAGGATTAGATCTACTGTTCTTAAAGAAGGAGGATTATGTG  
CTGCCCTAAAAGAAGAATGCTGTTTCTACGCGGACCACACTGGCGTAGTGAGAGATAGCATGACAAAGCTAAGAGAAAGG  
TTAAACCAGAGACAAAATTTGTTTGAATCAGGACAAGGTGGTTTGGAGGACTGTTTAAACAGGTCCCCATGGTTTACGAC  
CTTGATATCCACCATTATGGGCCCCCTTGATAATACTCTTATTAATCCTACTCTTCGGACCCTGTATTCTCAACCGCTTGG  
TCCAGTTTATAAAAGACAGAATTTCCGTGGTGCAGGCCCTGGTTCTGACCCAACAGTATCACCAACTCAAATCAATAGGT  
CCAGAAAAAGTGGAATCACGTGAATAAAAGATTTTATTAGTTTCCAGAAAGAGGGGGGAATGAAAGACCCACCATAAG  
GCTTAGCAAGCTAGCTGCAGTAACGCCATTTTGCAAGGCATGAAAAAGTACCAGAGCTGGGTTCTCAAAGTTACAAGGA  
AGTTTCAAGTTATAGATTAACAGTTAAAGATCAAGGCTGAATAGCACTGGGACAGGGGCCGAACAGGATATCGGTGGTCAAG  
CACCTGGGCCCCGGCTCAGGGCCAAGAACAGATGGTTCTCAGATAAAGCGGAACACAGCAACAGACACAGAAGCCCCGATA  
GACGTCAAGTGTAGCAGAACTAGCTTCACTGATTTAGAAAAATAGAGGTGCACAGTGCTCTGGTCACTCCTTAAACCTGT  
GTGTCTGCCAATGTTCTGACCAGATATGTGCCCATTTGCTGAACCTTCATTAGACTCTTTCTTGTACCCCTCCCCCTACCC  
ATTTCTAGAAAATAGACATTGTTTATAGATCTAAAAAGTCCCACCTCAGTTTCCCCAAATGACCGGGAAGTACCCCAAACCT  
TATTGAACTAACCAACCAGCTCGCTTCTCGCTTCTGTAACCGCGCTTTTGTCTCCCGAGCCCTAGCCCTATAAAAAGAG  
TAAAAACTCCACACTCGGCGCGCCAGTCTCCGATAGACTGAGTCGCCCGGGTACCCGTGTTCCCAATAAAGCCTCTTGC  
TGTTTACATCCGAATCGTGGACTCGCTGATCCTTGGGAGGGTCTCCTCAGATTGATTGACTGCCACCTGGGGGGTCTTT  
CA

>Mpmv4

TGAAAGACCCCACCATAAGGCTTAGCAAGCTAGCTGCAGTAACGCCATTTTCGAAGGCATGAAAAAGTACCAGAGCTGGG  
TTCTCAAAAGTTACAAGGAAGTTCAAGTTATAGATTAACAGTTAAAGATCAAGGCTGAATAGCACTGGGACAGGGGCCGAA  
CAGGATATCGGTGGTCAAGCACCTGGGCCCCGGCTCAGGGCCAAGAACAGATGGTTCTCAGATAAAGCGGAACAGCAAC  
AGACACAGAAGCCCCGATAGACGTCAAGTGTAGCAGAACTAGCTTCACTGATTTAGAAAAATAGAGGTGCACAATGCTCT  
GGTCACTCCTTGAACCTGTGTGTCTGCCAATGTTCTGACCAGATATGTGCCCATTTGCTGAACCTTCATTAGACTCTTTCC  
TTGTACCCCTCCCCTACCCATTTCTTGAATAAGACATTGTTTATAGATCTAAAAAGTCCCACCTCAGTTTCCCCAAATGAC  
CGGGAAGTACCCCAAACCTTATTGAACTAACCAACCAGCTCGCTTCTCGCTTCTGTAACCGCGCTTTTGTCTCCCGAGCCCTAGCCCTATAAAAAGAG  
CCTAGCCCTATAAAAAGGGTAAAAACTCCACACTCGGCGCGCCAGTCTCCGATAGACTGAGTCGCCCGGGTACCCGTGTTCCCAATAAAGCCTCTTGC  
TCCCAATAAAGCCTCTTGTGTTTACATCCGAATCGTGGACTCGCTGATCCTTGGGAGGGTCTCCTCAGATTGATTGACT

GCCCACCTGGGGGGTCTTTTCATTTGGAGGTCCCACCGAGATCAGGAGACCCCTGCCCAGGGACCACCGACCCCCGCCGGG  
AGGTAAGCTGGCCAGCGGTCTTTTCGTGTCTGTCTCTGTCTCCGTGCGTGTTTGTGCCGGCATCTAATGTTTGC GCCTGC  
GTCTGTACTAGTTGGCTAACTAGATCTGTATCTGGCGGTTCCGCGGAAGAACTGACGAGTTCGTATTCGCCGGCCGCAGCC  
CCTGGGAGACGTCCCAGCGGCCTCGGGGGCCCGTTTTGTGGCCATTCTGTATCAGTTAACCTACCCGAGTCGGACTTTTT  
TGGAGCTCCGCCACTGTACGTGGCTTTGTTGGGGGACGAGAGACAGAGACACTTCCCGCCCCCGTCTGGATTTTTTGCTTT  
CGGTTTTACGCCGAAACCGCGCTGCGCGTCTGATTTGTTTTATTGCTCTTTTGTCTTCGTTAGTTTTTCTGTCTTTAA  
GTGTTTTCAAGATCATGGGACAGACCGTAACCTACCCCTCTGAGTCTAACCTTGACGACTGGGGAGATGTCCAGCGCATT  
GCATCCAACCACTGTGTGGATGTCAGGAAGAGGCGCTGGATTACCTTCTGTTCCGCCGAATGGCCAACCTTCAATGTAGG  
ATGGCCTCAGGATGGTACTTTCAATTTAAGTATTATCTCTCAGGTTAAGTCTAGAGTGTTTTGTCTGGTCCCCACGGAC  
ACCCGATCAGGTCCCATATATCTGTACCTGGGAGGCACTTGCCCTATGACCCCTCCGTGGGTCAAACCGTTTTGTTTCT  
CCTAAACCTCCTCCCTTGCCGACAGCTCCCGTCTCCCGCCCGGTCTTCTGCGCAACCTCCGTCCCGATCTGCCCTTTA  
CCCTGCCCTTACCCCTCTATAAAGTCAAACCTCCTAAGCCCCAGGTTCTCCCTGATAGCGGCGGACCTCTCATTGACC  
TTCTCACAGAGGACCCCCCGCCGTACGGAGCACAACTTCTCCTCTGCCAGAGAGAACGATGAAGAAGAGGCGGCCACC  
ACCTCCGAGGTTTTCCCCCTTCTCCCATGGCGTCTCGACTGCGGGGAAGGAGAGACCTCCCGCAGCGGACTCCACCTC  
CTCCCAGGCACTCCACTCCGTATGGGGGAGATGGCCAGCTTCAGTACTGGCCGTTTTCTCCTCTGACTTATATAATT  
GGAAAAATAATAACCTTCTTTTTCTGAAGATCCAGGTAAATTGACGGCCTTGATTGAGTCCGTCTCATACCCACCAG  
CCCACCTGGGACGACTGTCAGCAGTTGTTGGGGACCCTGCTGACCGGAGAAGAAAAGCAGCGGGTGCTCCTAGAGGCTAG  
AAAGGCAGTCCGGGGCAATGATGGACGCCCCACTCAGTTGCCTAATGAAATCAATGCTGCCTTTCCCTTGAGCGCCCTG  
ATTGGGATTACACCACTACAGAAGGTAGGAACCACCTAGTCCTCTATCGCCAGTTGCTCTTAGCGGGTCTCCAAAACGCG  
GGCAGAAGCCCCACCAATTTGGCCAAGGTAAAGGGATAACCCAGGGACCTAATGAGTCTCCCTCAGCCTTTTTAGAGAG  
ACTCAAGGAGGCTATCGCAGGTACACTCCTTATGACCCTGAGGACCCAGGGCAAGAAACCAATGTGTCTATGTCATTCA  
TCTGGCAGTCTGCCCCGATATCGGGCGAAAGTTAGAGCGGTTAGAAGATTTAAAGAGCAAGACCTTAGGAGACTTAGTG  
AGGGAAGCTGAAAAGATCTTTAATAAACGAGAAACCCCGGAAGAAAGAGAGGAACGTATCAGGAGAGAAACAGAGGAAAA  
AGAAGAACGCCGTAGGGCAGAGGATGAGCAGAAAGAGAAAGAAAGGGACCGCAGAAGACATAGAGAGATGAGCAAGCTCT  
TGGCCACTGTAGTTATTGGTCAGAGACAGGATAGACAGGGGGGAGAGCGGAAGAGGCCCAACTTGATAAGGATCAATGC  
GCCTACTGCAAAGAAAAGGGACACTGGGCTAAAGACTGCCCAAAGAAGCCACGAGGGCCCCGAGGACCGAGGCCCCAGAC  
CTCCCTCCTGACCTTAGTGTACTAGGGAGGTGAGGTGAGGCCCCCCCCCTGAACCCAGGATAACCTCAAAGTCGGGG  
GGCAACCCGTACCTTCTGGTAGATACTGGGGCCCAACACTCCGTGCTGACCCAAAATCTGGAGCCCCTAAGTGACAAG  
TCTGCCTGGGTCCAAGGGGCTACTGGAGGAAAGCGGTATCGCTGGACCAGGATCGCAAAGTGCATCTAGCTACCGGTAA  
GGTCACCCACTCTTTCTCCATGTACCAGACTGCCCTATCCTCTGCTAGGAAGAGATTTGCTGACTAAACTAAAAGCCC  
AAATCCACTTTGAGGGATCAGGAGCTCAGGTTATGGGACCAATGGGACAGCCCCCTGCAAGTGCTGACCCTAAACATAGAA  
GATGAGTATCGGCTACATGAGACCCCAAAGAGCCGGATGTTTCTCTAGGGTCCACATGGCTTTCTGATTTTCCCCAGGC  
CTGGGCGGAAACCGGGGGCATGGGACTGGCAGTTCGCCAAGCTCCTCTGATCATACCTCTGAAGGCAACCTCTACCCCG  
TGTCATATAAAACAATAACCCATGTACACAAGAAGCCAGACTGGGGATCAAGTCCACATACAGAGACTGTTGGACCAGGGA  
ATACTGGTACCCTGCCAGTCCCCCTGGAACACGCCCCCTGCTACCCGTTAAGAAACCAGGGACTAATGATTACAGGCCTGT  
CCAAGATCTGAGAGAAGTCAACAAGCGGGTGAAGACATCCACCCACCGTGCCCAACCTTACAACCTCTTGAGCGGGC  
TCCCACCGTCCCACCACTGGTACACTGTGCTTGAAGGATGCCTTTTTCTGCCTGAGACTCCACCCACCAGTCAG  
CCTCTCTTGCCTTTGAGTGGAGAGACCCAGAGATGGGAATCTCAGGACAATTAACCTGGACCAGACTCCACAGGGTTT  
CAAAAACAGTCCCACCTGTTTGATGAGGCACTGCACAGAGACCTAGCAGGCTTCCGGATCCAGCACCCAGACTTGATCC  
TGCTACAGTACGTGGATGATTTACTGCTGGCCGCCACTTCTGAGCTCGACTGCCAACAAGGTACTCGGGCCCTGTTACAA  
ACCCTAGGGGACCTCGGGTATCGGGCTCGGCCAAGAAAGCCCAAATTTGCCAGAAACAGGTCAAGTATCTGGGGTATCT  
TCTAAAAGAGGGTCAGAGATGGCTGACTGAGGCCAGAAAAGAGACTGTGATGGGGCAGCCTATTCCGAAGACCCCTCGAC  
AACTAAGGGAGTTCCTAGGGACGGCAGGCTTCTGTGCGCTCTGGATCCCTGGGTTTGAGAAATGGCCGCCCCCTTGTA  
CCTCTCACAAAACGGGGACTCTGTTTAATTGGGGCCAGACCAGCAAAGGCCTATCAAGAAATCAAACAGGCTCTTCT  
AACTGCCCCAGCCCTGGGGTTGCCAGATTTGACTAAGCCCTTTGAACTCTTTGTGACGAGAAGCAGGGCTACGCCAAAG  
GCGTCCTAACGCAAAAACCTGGGACCTTGGCGTCGGCCGTGGCCTACCTGTCCAAAAGCTAGACCCAGTGGCAGCTGGG  
TGGCCCCCTTGCTACGGATGGTAGCAGCCATTGCCGTTCTGACAAAGGATGCAGGCAAGCTAACTATGGGACAGCCGCT  
AGTCATTCTGGCCCCCATGCGGTAGAAGCACTGGTCAAACAACCCCTGACCGCTGGCTATCCAATGCTCGCATGACCC  
ACTATCAGGCAATGCTCCTAGATACGGACCGGGTTCAGTTCCGACCGGTGGTAGCCTTAAACCCGGCCACGTTGCTCCCC  
TTGCCGGGAAAAGAGACCCCCACGACTGCCTCGAGATCTTGGCTGAGACACACGGCACCAGACCGGACCTCACGGACCA  
GCCCCCTCCCAAATGCCGACCACACCTGGTATACAGATGGAAGCAGCTTCTGACAGGAGGGGCAACGTAAGGCTGGAGCAG  
CGGTGACCACCGAGACCGAGGTAATCTGGGCCAAGGCGTTGCCAGCCGGGACATCCGCCCAGCGAGCTGAACTAATAGCA  
CTCACCAGGCCCTAAAGATGGCAGAAGGTAAGAAGCTAAATGTTTATACTGATAGCCGCTATGCCTTTGCTACCGCCCA  
TGTCCATGGAGAAATATATAGGAGACGTGGGTTGCTCACCTCAGAAGGCAAGGAGATCAAGAACAAGGGCGAAATCTTGG  
CCTTACTGAAAGCTCTCTTTCTGCCAAAAGACTCAGTATAATTCACTGCCAGGACATCAGAAAGGCAATAGTGCTGAA  
GCTAAAGGCAACCGAATGGCGGACCAGGCAGCCCGGAAGCAGCCATGGGGACTGACACAAAGGCCTCCTCACTTCTCAT  
AGAGACCTCAACCCCGTACACTCCAGACTTCTTCCATTATACTGAAACAGATATAAAGAACCTACGAGAGTTGGGAGCCA

CATATGATAGAGAGAAAAAATATTGGGTCCTGCAAGGTAAACCTGTGATGCCTGACCAGTTACCTTTGAATTATTAGAC  
TTCCTTCACCAGCTACCCACCTTAGCTATCAGAAGATGAGGGCACTTCTAGACAGAAAAGAAAGCCCCATTACATGCT  
AAATAAAGATAAGATCCTCCACGAGGTGGCGGAATCATGCCAAGCCTGTGTCCAAGTAAATGCCAGTAAAGCTAAGGTCG  
GTCCCCGGGGTGCAGTAAGAGGACATCGACCAGGCACCCATTGGGAAATTGACTTTACTGAAGTAAGGCCCGGACTGTAT  
GGGCATAAGTATCTTCTGGTGTGTTGTGGACACGTTCTCTGGCTGGGTGGAAGCCTTCCCAACCAAGCATGAGACTGCCAA  
AGTTGTGACCAAAAAGCTTCTAGAAGAAATATTTCCAAGGTTTGGAAATGCCCAAGTATTGGGGACTGATAATGGGCCTG  
CCTTCGTCTCCCAGGTAAGTCAGTCGGTGGCCAAGCTACTGGGGATTGATTGGAACTACATTGTGCTTACAGACCCAG  
AGTTCAGGTCAGGTAGAAAGAATGAATAGGACAATCAAGGAGACTTTGACTAAATTAACGCTTGCAACTGGCACTAGAGA  
CTGGGTACTCTACTTCCCTTGGCCCTCTACCGAGCCCGCAACACTCCGGGCCCCATGGACTCACTCCGTATGAAATCC  
TGATAGGGCGCCCCGCCCTTGTTAATTTCCATGATCCTGAAATGTCAAAGTTTACTAATAGCCCCCTCTCTCCAAGCT  
CACTTACAGGCCCTCCAAGCAGTACAACGAGAGGTCTGGAAGCCTCTGGCCGCTGCCTATCAGGACCAACAAGACCAGCC  
TGTGATACCACACCCCTTCCGTGTGCGCGACACCGTGTGGGTACGCCGGCACCAGACTAAGAACTTGGAACCTCGCTGGA  
AAGGACCCTACACCGTCCTGCTGACCACCCCCACCGCTCTCAAAGTAGACGGCATCGCTGCGTGGATCCACGCCGCTCAC  
GTAAAAGCGCGACAACCCCTCCGGCCGGAACAGCATCAGGACCGACATGGAAGGTCCAGCGTTCTCAAACCCCTTAAA  
GATAAGATTAACCCGTGGGCCCCCTGATAGTCCTGGGGATCTTAATAAGGGCAGGAGTATCAGTACCACATGACAGCCC  
TCATCAGGTCTTCAATGTTACTTGGAGAGTTACCAACTTAATGACAGGACAAACAGCTAATGCTACCTCCCTCCTGGGGA  
CAATGACCGATGCCTTTCCCAAAGTGTACTTTGACTTGTGCGATTTAATAGGGGACGACTGGGATGAGACTGGACTCGGG  
TGTGCACTCCCGGGGAAGAAAAAGGGCAAGAACATTTGACTTCTATGTTTGGCCCGGCATACTGTACCAACAGGGTG  
TGGAGGCCCGAGAGAGGGCTACTGTGGCAAATGGGGCTGTGAGACCCTGGACAGGCATACTGGAAGCCATCATCATCAT  
GGGACCTAATTTCCCTTAAGCGAGGAAACACCCCTCGGAATCAGGGCCCCCTGTTATGATTCTCAGCGGTCTCCAGTGGC  
ATCCAGGGTGCCACACCGGGGGGTGATGCAATCCCTAGTCCTAGAATTCAGTGACGCGGGTAAAAAGGCCAGCTGGGA  
TGGCCCCAAAGTATGGGGACTAAGACTGTACCGATCCACAGGAACCGACCCGGTGACCCGGTTCTCTTTGACCCGCCAGG  
TCCTCAATATAGGGCCCCGCATCCCCATTGGGCCTAATCCCGTGATCACTGACCAGTTACCCCCCTCCCGACCCGTGCAG  
ATCATGCTCCCCAGGCCTCCTCAGCCTTCCCCTACAGGCGCAGCCTCTATACAACCTGGGACGGGAGACAGACTGCTGAA  
CCTGGTAGATGGAGCCTACCAAGCACTCAACCTCACCAGTCCTGACAAAACCAAGAGTGCTGGTTGTGTCTGGTATCGG  
GACCCCCCTATTACGAAGGGGTGGCGTCCTAGGTACCTACTCCAACCATACTCTGCCCCAGCTAACTGCTCCGTGGCC  
TCCCAACACAAGCTGACCTGTCCGAAGTAAACCGGACAGGACTCTGCGTAGGAGCAGTTCCCAAAACCCATCAGGCCCT  
GTGTAATACACCCGACATGACGCGAGCGGTCTACTACTCTGCTGCTCCCGCCGGGACCATTGTGGGCTTGCAACCCG  
GGCTCACTCCCTGCCTATCTACTACTGTACTCAACCTCACCACCGATTACTGTGTCTGTTGAGCTCTGGCCAAAGGTG  
ACCTACCACTCCCCTGGTTATGTTTATGGCCAGTTTGAGAGAAAAACCAATATAAAAAGAGAGCCGGTGTCTTAATCTCT  
GGCCCTGCTGTTGGGAGGACTTACTATGGGCGGCATAGCTGCAGGAGTAGGAACAGGGACTACAGCCCTAGTGGCCACCA  
AGCAATTCGAGCAGCTCCAGGCAGCCATACATACAGACCTTGGGGCCTTAAAAAATCAGTCAGTGCCCTAGAAAAGTCT  
CTGACCTCGTTGTCTGAGGTGGTCCTACAGAACCGGAGAGGATTAGATCTACTGTTCTTAAAGAAGGAGGATTATGTGC  
TGCCCTAAAAGAAGAATGCTGTTTCTACGCGGACCACACTGGCGTAGTGAGAGATAGCATGGCAAAGCTAAGAGAAAGGT  
TAAACCAGAGACAAAAATTGTTTGAATCAGGACAAGGGTGGTTTGGGGACTGTTTAAACAGGTCCCATGGTTACAGACC  
TTGGTATCCACCATTATGGGCCCCCTTGATAATACTCTTATTAATCCTACTCTTCGGACCCTGTATTCTCAACCGCTTGGT  
CCAGTTTGTAAAAGACAGAATTTCCGGTGGTGCAGGCCCTGGTTCTGACCCAACAGTATACCAACTCAAATCAATAGGTC  
CAGAAGAAGTGGAATCACGTGAATAAAAGATTTTATTAGTTTCCAGAAAGAGGGGGGAATGAAAGACCCACCATAAGG  
CTTAGCAAGCTAGCTGCAGTAACGCCATTTTCGAAGGCATGAAAAAGTACCAGAGCTGGGTTCTCAAAGTTACAAGGAA  
GTTTCAGTTATAGATTAACAGTTAAAGATCAAGGCTGAATAGCACTGGGACAGGGGCCGAACAGGATATCGGTGGTCAAGC  
ACCTGGGCCCCGGCTCAGGGCCAAGAACAGATGGTTCTCAGATAAAGCGGAACCAGCAACAGACACAGAAGCCCCGATAG  
ACGTCAGTGTTAGCAGAACTAGCTTCACTGATTTAGAAAAATAGAGGTGCACAATGCTCTGGTCACTCCTTGAACCTGTG  
TGTCTGCCAATGTTCTGACCAGATATGTGCCCATTGCTGAACCTTCATTAGACTCTTTCCTTGTACCCCTCCCCTACCCA  
TTTCTTGAATAAGACATTGTTTATAGATCTAAAAAGTCCCACCTCAGTTTCCCCAAATGACCGGGAAGTACCCCAAACCTT  
ATTGAACTAACCAACCAGCTCGCTTCTCGCTTCTGTAACCACGCTTTTTGCTCCCCAGCCCTAGCCCTATAAAAAGGGT  
AAAAACTCCACACTCGGCGCGCCAGTCCTCCGATAGACTGAGTCGCCCCGGGTACCCGTGTTCCCAATAAAGCCTCTTGCT  
GTTTACATCCGAATCGTGGACTCGCTGATCCTTGGGAGGGTCTCCTCAGATTGATTGACTGCCACCTGGGGGGTCTTTC

A

>Mpmv5

TGAAAGACCCCACCATAAGGCTTAGCAAGCTAGCTGCAGTAACGCCATTTTGAAGGCATGAAAAAGTACCAGAGCTGGG  
TTCTCAAAGTTACAAGGAAGTTCAAGTTATAGATTAACAGTTAAAGATCAAGGCTGAATAGCACTGGGACAGGGGCCGAA  
CAGGATATCGGTGGTCAAGCACCTGGGCCCCGGCTCAGGGCCAAGAACAGATGGTTCTCAGATAAAGCGGAACCAGCAAC  
AGACACAGAAGCCCCGATAGACGTCAGTGTTAGCAGAACTAGCTTCACTGATTTAGAAAAATAGAGGTGCACAGTGCTCT  
GGTCACTCCTTGAACCTGTGTGTCTGCCAATGTTCTGACCAGATATGTGCCCATTGCTGAACCTTCATTAGACTCTTTC  
TTGTACCCCTCCCCTACCCATTTCTTAAAAATAGACATTGTTTATAGATCTAAAAAGTCCCACCTCAGTTTCCCCAAATGAC  
CGGGAAGTACCCCAAACCTTATTGAACTAACCAACCAGCTCGCTTCTCGCTTCTGTAACCAGCGCTTTTTGCTCCCCAGC  
CCTAGCCCTATAAAAAGGGTAAAAACTCCACACTCGGCGCGCCAGTCCTCCGATAGACTGAGTCGCCCCGGGTACCCGTGT

TCCCAATAAAGCCTCTTGCTGTTTACATCCGAATCGTGGACTCGCTGATCCTTGGGAGGGTCTCCTCAGATTGATTGACT  
GCCCACCTGGGGGGTCTTTTCAATTTGGAGGTCCCACCGAGATCAGGAGACCCCTGCCAGGGACCACCGACCCCCGCCGGG  
AGGTAAGCTGGCCAGCGGTCGTTTCGTGTCTGTCTCTGTCTCCGTGCGTGTTTGTGCCGGCATCTAATGTTTGCGCCTGC  
GTCTGTACTAGTTGGCTAACTAGATCTGTATCTGGCGGTTCCGCGGAAGAACTGACGAGTTCGTATTTCCCGACCGCAGCC  
CCTGGGAGACGTCCCAGCGGCCTCGGGGGCCCGTTTTGTGGCCATTCTGTATCAGTTAACCTACCCGAGTCAGACTTTT  
TAGAGCTCCGCCACTGTACGTGGCTTTGTTGGGGGACGAGAGACAGAGACACTTCCCGCCCCCGTCTGGATTTTTGCTTT  
CGGTTTTACGCCGAAACCGCGCTGCGCGTCTGATTTGTTTTATTGTTCTTTTGTTCCTTCGTTAGTTTTTTTTCTGTCTTT  
AAGTGTTCCTCAAGATCATGGGACAGACCGTAACTACCCCTCTGAGTCTAACCTTGCAGCACTGGGGAGATGTCCAGCGCA  
TTGCATCCAACCAAGTCTGTGGATGTCAGGAAGAGGCGCTGGATTACCTTCTGTTCCGCCGAATGGCCAACTTTCAATGTA  
GGATGGCCTCAGGATGGTACTTTCAATTTAAGTATTATCTCTCAGGTTAAGTCTAGAGTGTTTTGTCTGGTCCCCACGG  
ACACCCGGATCAGGTCCCATATATCGTTACCTGGGAGGCACTTGCCTATGACCCCCCTCCGTGGGTCAAACCGTTTGT  
CTCCTAAACCTCCTCCCTTGCCGACAGCTCCCGTCTCCCGCCGGTCTTCTGCGCAACCTCCGTCCCGATCTGCCCTT  
TACCCTGCCCTTACCCCTCTATAAAGTCCAAACCTCCTAAGCCCCAGGTTCTCCCTGATAGCGGCGGACCTCTCATTGA  
CCTTCTCACAGAGGACCCCCCGACGGAGCACAACTTCTCCTCTGCCAGAGAGAACAATGAAAAAGAGGCGGCCACCAC  
CTCCGAGGTTTTCCCCCTTCTCCCATGGCGTCTCGACTGCGGGGAAGGAGAGACCCTCCCGCAGCGGACTCCACCTCCT  
CCCAGGCATTCCCCTCCGTATGGGGGAGATGGCCAGCTTCAGTACTGGCCGTTTTCTCCTCTGACTTATATAATTGG  
AAAAATAATAACCTTCTTTTTCTGAAGATCCAGGTAAATTGACGGCCTTGATTGAGTCCGTCTCATCACCCACCAGCC  
CACCTGGGACGACTGTCAGCAGTTGTTGGGGACCCTGCTGACCGGAGAAAAAAGCAGCGGGTGCTCCTAGAGGCTAGAA  
AGGCAGTCCGGGGCAATGATGGACGCCCCACTCAGTTGCCTAATGAAATCAATGCTGCCTTTCCCTTGAGCGCCCTGAT  
TGGGATTACACCACTACAGAAGGTAGGAACCACCTAGTCCTCTATCGCCAGTTGCTCTTAGCGGGTCTCCAAAACGCGGG  
CAGAAGTCCACCAATTTGGCCAAGGTAAAAGGGATAACCCAGGGACCTAATGAGTCTCCCTCAGCCTTTTTAGAGAGAC  
TCAAGGAGGCCTATCGCAGGTACACTCCTTATGACCCTGAGGACCCAGGGCAAGAAACCAATGTGTCTATGTCATTTCATC  
TGGCAGTCTGCCCCGATATCGGGCGAAAGTTAGAGCGGTTAAAAGATTTAAAGAGCAAGACCTTAGGAGACTTAGTGAG  
GGAAGCTAAAAAGATCTTTAATAAACGAGAAACCCCGGAAGAAAGAGAGGAACGTATCAGGAGAGAAACAGAGGAAAAAG  
AAGAACGCCGTAGGGCAGAAGATGAGCAGAAAGAGAAAGAAAGGGACCGCAGAAGACATAGAGAGATGAGCAAGCTCTTG  
GCCACTGTAGTTATTGGTCAGAGACAGGATAGACAGGGGGGAGAGCGGAAGAGGGCCCCAACTTGATAAGGATCAATGCGC  
CTACTGCAAAGAAAAGGGACTGGGCTAAAGACTGCCCAAAGAAAGCCACGAGGGCCCCGAGGACCGAGGCCCCAGACCT  
CCTCCTGACCTTAGGTACTAGAGAGGTGAGGTCAGGGTCAGGAGCCCCCTGAACCCAGGATAACCTCAAGTCCGGGGG  
CAACCCGTACCTTCTGGTAGATACTGGGGCCCAACCTCCGTGCTGACCCAAAATCCTGGACCCCTAAGTGACAAGTC  
TGCCTGGGTCCAAGGGGCTACTGGAGGAAAGCGGTATCGCTGGACCACGGATCGCAAAGTACATCTAGCTACCGGTAAGG  
TCACCCACTCTTTCTCCATGTACCAGACTGCCCCCTATCCTCTGCTAAGAAGAGATTTGCTGACTAAACTAAAAGCCCAA  
ATCCACTTTAAGGGATCAGGAGCTCAGGTTGTGGGACCAATGGGACAGCCCCCTGCAAGTGCTGACCTTAAACATAGAAGA  
TGAGTATCGGCTACATGAGACCTCAAAGAGCCGGATGTTTCTCTAGGGTCCACATGGCTTTCTGATTTTTCCCAGGCCT  
GGGCAAAAACCGGGGGCATGGGACTGGCAGTTCCGCAAGCTCCTCTGATTATACCTCTGAAGGCAACCTCTACCCCGTG  
TCCATAAAACAATAACCCATGTACACAAGAAGCCAGACTGGGGATCAAGCCCCACATACAGAGACTGTTGGACCAGGGAAT  
ACTGGTACCCTGCCAGTCCCCCTGGAACACGCCCCCTGCTACCCGTTAAGAAACCAGGGACTAATGATTACAGGCCTGTCC  
AAGATCTGAGAAAAGTCAACAAGCGGTGGAAGACATCCACCCACCGTGCCCAACCTTACAACCTCTTGAGCGGGCTC  
CCACCGTCCACCAAGTGGTACACTGTGCTTGACTTAAAGGATGCCTTTTTCTGCCTGAGACTCCACCCACCAAGTCAGCC  
TCTCTTGCCTTTGAGTAGAGAGACCCAGAGATGGGAATCTCAGGACAATTAACCTGGACCAGACTCCCACAGGGTTTCA  
AAAACAGTCCCACCTGTTTAAATGAGGCACTGCACAGAGACCTAGCAGGCTTCCGGATCCAGCACCCAGACTTGATCCTG  
CTACAGTACGTGGATGACTTACTGCTGGCCGCCACTTCTGAGCTCGACTGCCAACAAGGTACTCGGGCCCTGTTACAAAC  
CCTAGGGGACCTCGGGTATCGGGCCTCGGCCAAGAAAGCCCAAATTTGCCAGAAACAGGTCAAGTATCTGGGGTATCTTC  
TAAAAGAGGGTCAGAGATGGCTGACTGAGGCCAGAAAAGAGACTGTGATGGGGCAGCCTACTCCGAAGACCCCTCGACAA  
CTAAGGGAGTTCTTAGGGACGGCAGGCTTCTGTGCGCTCTGGATCCCTGGGTTTGCAGAAATGGCAGCCCCCTTGTACCC  
TCTACCAAAAACGGGGACTCTGTTTAAATTGGGGCCAGACCAGCAAAAGGCCTATCAAAAAATCAAACAGGCTCTTCTAA  
CTGCCCCAGCCCTGAGATTGCCAGATTTGACTAAGCCCTTTGAACCTTTTGTGCGACGAGAAGCAGGGCTACGCCAAAGGC  
GTCCTAACGCAAAAACCTGGGACCTTGGCGTCGGCCGGTGGCCTACCTGTCCAAAAGCTAGACCCAGTGGCAGCTGGGTG  
GCCCCCTTGCTACGGATGGTAGCAGCCATTGCCGTTCTGACAAAGGATGCAGGCAAACTAACTATGGGACAGCCGCTAG  
TCATTCTGGCCCCCATGCGGTAGAAGCACTGGTCAAACAACCCCTGACCGCTGGCTATCCAATGCTCGCATGACCCAC  
TATCAGGCAATGCTCCTAGATACGGACCGAGTTCAGTTCGGACCGGTGGTAGCCTTAAACCCGGCCACGTTGCTCCCCTT  
GCCGGGAAAAGAGACCCCCACGACTGCCTCGAGATCTTGGCTGAGACACACGGCACCCAGACCGGACCTCACGGACCAGC  
CCCTCCCAAATGCCGACCACACCTGGTATACAGATAAAAGCAGCTTCTGTCAGGAGGGGCAACGTAAGGCTGGAGCAGCG  
GTGACCACCGAGACCGAGGTAATCTGGGCCAAGGCGTTGCCAGCCGGGACATCCGCCCAGCGAGCTGAACTAATAGCACT  
CACCCAGGCCCTAAAGATGGCAGAAGGTAAGAAGCTAAATGTTTATACTGATAGCCGCTATGCCTTTGCTACCGCCCATG  
TCCATAAAAAAATATATAGGAGACGTGGGTTGCTCACCTCAAAGGCAAGAAGATCAAGAACAAGGGCAAAATCTTGGCC  
TTACTGAAAGCTCTCTTTCTGCCAAAAGACTCAGTATAATTCAGTGCCAGGACATCAGAAAGACAATAGTGCTGAAGC  
TAAAGGCAACCGAATGGCGGACCAGGCAGCCCGGAAGCAGCCATGGGGACTGACACAAAGGCCTCCTCACTTCTCATAG

AGACCTCAACCCCGTACACTCCAGACTTCTTCCATTATACTGAAACAGATATAAAGAACCTACAAGAGTTGGGAGCCACA  
TATGATAGAGAGAAAAAATATTGGGTCTGCAAGGTAAACCTGTGATGCCTGACCAGTTCACCTTTAAATTATTAGACTT  
CCTTCACCAGCTCACCCACCTTAGCTATCAGAAGATAAGGGCACTTCTAGACAGAAAAGAAAGCCCTATTACATGCTAA  
ATAAAGATAAGATCCTCCACGAGGTGGCGGAATCATGCCAAGCCTGTGTCCAAGTAAATGCCAGTAAAGCTAAGGTCCGT  
CCCGGGGTGCGAGTAAGAGGACATCGACCAGGCACCCATTGAGAAATTGACTTTACTGAAGTAAGGCCCGGACTGTATGG  
GTATAAGTATCTTCTGGTGTGTTGTGGACACGTTCTCTGGCTGGGTAGAAGCCTTCCCAACCAAGCATGAGACTGCCAAAG  
TTGTGACCAAAAAGCTTCTAGAAAAAATATTTCCAAGGTTTGGAAATGCCCAAGTATTGGGGACTGATAATGGGCCTGCC  
TTCGTCTCCAGGTAAGTCAGTCGGTGGCCAAGCTACTGGGGATTAATTAAAAACTACATTGTGCTTACAGACCCAGAG  
TTCAGGTCAGGTAAGAAAGAAATGAATAAGACAATCAAGGAGACTTTGACCAATTAACGCTTGCAACTGGCACTAGAGACT  
GGGTACTCCTACTTCCCTTGGCCCTCTACCGAGCCGCAACACTCCGGGCCCCATGGACTCACTCCGTATAAAATCCTG  
TATGGGGCGCCCCGCCCCCTTGTTAATTTCCATGATCCTAAAATGTCAAAGTTTACTAATAGCCCCTCTCTCCAAGCTCA  
CTTACAGGCCCTCCAAGCAGTACAACGAGAGGTCTGGAAGCCTCTGGCCGCTGCCTATCAGGACCAACAAGACCAGCCTG  
TGATACCACACCCCTTCCGTGTGCGCGACACCGTGTGGGTACGCCGGCACCAGACTAAGAACCTGAAACCTCGCTGGAAA  
GGACCCTACACCGTCTGTGACCCTCCACCGCTCTCAAAGTAGACGGCATCGCTGCGTGGATCCACGCCGCTCACGT  
AAAAGCGGCGACAACCCCTCCGGCCGGAACAGCATCAGGACCGACATGGAAGGTCCAGCGTTCTCAAAACCCCTTAAAGA  
TAAGATTAACCCGTGGGCCCCCTGATAGTCTTGGGGATCTTAATAAGGGCAGGAGTATCAGTACCACATGACAGCCCTC  
ATCAGGTCTTCAATGTTACTTAGAGAGTTACCAACTTAATGACAGGACAAACAGCTAATGCTACCTCCCTCCTGGGGACA  
ATGACCGATGCCTTTCCCAAAGTGTACTTTGACTTGTGCAATTTAATAGGGGACGACTGGGATGAGACTGGACTCGGGTG  
TCGCACTCCCGGGGAAAGAAAAAGGGCAAAAACATTTGACTTCTATGTTTGGCCCGGGCATACTGTACCAACAGGGTGTG  
GAGGCCCGAGAGAGGGCTACTGTGGCAAATGGGGCTGTGAGACCCTGGACAGGCATACTGGAAGCCATCATCATCATGG  
GACCTAATTTCCCTTAAGCGAGGAAACACCCCTCGGAATCAGGGCCCCCTGTTATGATTCCCTCAGCGGTCTCCAGTGACAT  
CCAGGGTGCCACACCGGGGGGTGCGATGCAATCCCTTAGTCTTAGAATTAAGTACGCGGGTAAAAAGGCCAGCTGGGATG  
GCCCCAAAGTATGGGGACTAAGACTGTACCGATCCACAAGAACCGACCCGGTGACCCGGTCTCTTTGACCCGCCAGGTC  
CTCAATATAGGGCCCCGCATCCCCATTGGGCCTAATCCCGTGATCACTGACCAGTTACCCCCCTCCCGACCCGTGCAGAT  
CATGCTCCCCAGGCCTCCTCAGCCTTCCCCTACAGGCGCAGCCTCTATACAACCTGGGACGGGAGACAGACTGCTGAACC  
TGGTAGATAGAGCCTACCAAGCACTCAACCTCACCAGTCTTGACAAAACCAAGAGTGTGGTTGTGTCTGGTATCGGGA  
CCCCCTATTACGAAGGGTTGCCGTCTTAGTACCTACTTCAACCATACCTCTGCCCCAGCTAACTGCTCCGTGGCCCTC  
CCACACAAGCTGACCCCTGTCCGAAGTAACCGGACGGGACTCTGCGTAGGAGCAGTTCCCAAAACCCATCAGGCCCTGT  
GTAATACCACCCAAAATACAAGCGACGGGTCTACTACTGTGGCTGCTCCCGCCGGGACCATTGTTGGCTTGCAACACCGGG  
CTCACTCCCTGCCTATCTACTACTGTACTCAACCTCACCACCGATTACTGTGCTCCTGGTTGAGCTCTGGCCAAAAGTGAC  
CTACCCTCCCTGGTTATGTTTATGGCCAGTTTGGAGAGAAAACCAAATATAAAAGAGAGCCGGTGTCTTAATCTCTGG  
CCCTGCTGTTGGGAGGACTTACTATGGGCGGCATAGCTACAGGAGTAAAAACAGGGACTACAGCCCTAGTGGCCACCAAG  
CAATTCGAGCAGCTCCAGGCAGCCATACATACAGACCTTGGGGCCTTAGAAAAATCAGTCAGTGCCCTAAAAAAGTCTCT  
GACCTCGTTGTCTGAGGTGGTCTTACAGAACCGGAGAGGATTAGATCTACTGTTCTAAAAAAGGAAGATTATGTGCTG  
CCCTAAAAGAAGAATGCTGTTTCTACGCGGACCACACTGGCGTAGTGAGAGATAGCATGGCAAAGCTAAGAAAAAGGTTA  
AACCAGAGACAAAAATTGTTTGAATCAGGACAAGGGTGGTTTGGGGACTGTTTAAACAGGTCCCATAGTTTACGACCTT  
GATATCCACCATTATGGGCCCCCTTGATAATACTCTTATTAATCCTACTCTTCGGACCCCTGTATTCTCAACCGCTTGGTCC  
AGTTTGTAAAAGACAGAATTTCCGGTGGTGCAGGCCCTGGTTCTGACCCAACAGTATACCAACTCAAATCAATAGGTCCA  
GAAGAAGTGAAATCACGTGAATAAAAGATTTTATTAGTTTCCAGAAAGAGGGGGGAATGAAAGACCCCAACCATAGGCT  
TAGCAAGCTAGCTGCAGTAACGCCATTTTGAAGGCATGAAAAAGTACCAGAGCTGGGTTCTCAAAAGTTACAAGAAAGT  
TCAGTTATAGATTAACAGTTAAAGATCAAGGCTGAATAGCACTGGGACAGGGGCCGAACAGAATATCGGTGGTCAAGCAC  
CTGGGCCCCGGCTCAGGGCCAAGAACAGATGGTTCTCAGATAAAGCGGAACCAGCAACAGACACAGAAGCCCCGATAGAC  
GTCAGTGTTAGCAGAACTAGCTTCACTGATTTAAAAAATAGAGGTGCACAGTGCTCTGGTCACTCCTTGAACCTGTGTG  
TCTGCCAATGTTCTGACCAGATATGTGCCATTGCTGAACCTTCATTAGACTCTTTCCTTGTACCCCTCCCTACCCATT  
TCTTAAAAATAGACATTGTTTAGATCTAAAAAGTCCCACCTCAGTTTCCCCAAATGACCGGGAAGTACCCCAAACCTTAT  
TCGAATCAACCAACCAGCTCGCTTCTCGCTTCTGTAACCGCGCTTTTGTCTCCCGAGCCCTAGCCCTATAAAAAGGGTAA  
AACTCCACACTCGGCGCGCCAGTCTCCGATAGACTGAGTCGCCCGGGTACCCGTGTTCCCAATAAAGCCTCTTGCTGT  
TTACATCCGAATCGTGGACTCGCTGATCCTTGAGAGGGTCTCCTCAGATTGATTGACTGCCACCTGGGGGGTCTTTCA

>Mpmv6

TGAAAGACCCCAACCATAGGCTTAGCAAGCTAGCTGCAGTAACGCCATTTTGAAGGCATAAAAAAGTACCAGAGCTGG  
GTTCTCAAAAGTTACAAGGAAGTTCAAGTTATAGATTAACAGTTAAAGATCAAGACTGAATAGCACTGGGACAGGGGCCGA  
ACAGGATATCGGTGGTCAAGCACCTGGGCCCCGGCTCAGGGCCAAGAATAGATGGTTCTCAGATAAAGCGGAACCAGCAA  
CAGACACAGAAGCCCCGATAGACGTGAGTGTAGCAGAACTAGCTTCACTGATTTAGAAAAATAGAGGTGCACAGTGCTC  
TGGTCACTCCTTGAACCTGTGTGTCTGCCAATGTTCTGACCTGATATGTGCCATTGCTGAACCTTCATTAGACTCTTTC  
CTTGTACCCCTCCCTACCCATTTCTTGAAAATAGACATTGTTTAGATCTAAAAAGTCCCACCTCAGTTTCCCCAAATGA  
CCGGGAAGTACCCCAAACCTTATTGAACTAACCAACCAGCTCGCTTCTCGCTTCTGTAACCACGCTTTTGTCTCCCGAG  
CCCTAGCCCTATAAAAAGGGTAAAAACTCCACACTCGGCGCGCCAGTCTCCGATAGACTGAGTCGCCCGGGTACCCGTG

TTCCCAATAAAGCCTCTTGCTGTTTTACATCCGAATCGTGGACTCGCTGATCCTTGGGAGGGTCTCCTCAGATTGATTGAC  
TGCCCCACCTGGGGGGGGGGGTCTTTCATTTGGAGGTTCCACCGAGATCAGGAGACCCCTGCCCAGGGACCACCGACCCC  
CGCCGGGAGGTAAGCTGGCCAGCGGTCTGTTTCGTGTCTGTCTCTGTCTCCGTGCGTGTGTTGTGCCGGCATCTAATGTTTG  
CGCCTGCGTCTGTACTAGTTGGCTAACTAGATCTGTATCTGGCGGTTCCGCGGAAGAACTGACGAGTTTCGTATTCCCGGC  
CGCAGCCCCCTGGGAGACGTCCCAGCGGCCTCGGGGGCCCCGTTTTGTGGCCCATTTCTGTATCAGTTAACCTACCCGAGTCG  
GACTTTTTTGGAGCTCCGCCACTGTACGTGGCTTTGTTGGGGGACGAGAGACAGAGACACTTCCCGCCCCCGTCTGGATTT  
TTGCTTTTCGGTTTTTACGCCGAAACCGCGCTGCGCGTCTGATTTGTTTTATTGTTCTTTTGTTCCTTCGTTAGTTTTTTCT  
GTCTTTAAGTGTTTTCAAGATCATGGGACAGACCGTAACTACCCCTCTGAGTCTAACCTTGCAGCACTGGGGAGATGTCC  
AGCGCATTGCATCCAACCACTCTGTGGATGTCAGGAAGAGGCGCTGGATTACCTTCTGTTCCGCGCAATGGCCAACTTTC  
AATGTAGGATGGCCTCAGGATGGTACTTTCAATTTAAGTATTATCTCTCAGGTTAAGTCTAGAGTGTGTTTGTCTGTTCC  
CCACGGACACCCGGATCAGGTCCCATATATCGTTACCTGAGAGGCACTTGCCCTATGACCCCCCTCCGTGGGTCAAACCGT  
TTGTTTTCTCCTAAACCTCCTCCCTTGCCGACAGTCCCGTCTCCCGCCCGGTCTTCTGCGCAACCTCCGTCCCGATCT  
GCCCTTTACCCTGCCCTTACCCCCCTCTATAAAGTCCAAACCTCCTAAGCCCCAGGTTCTCCCTGATAGCGGCGGACCTCT  
CATTGACCTTCTCACAGAGGACCCCCCGCCGTACGGAGCACAACTTCTCTCTCTGCCAGAGAGAACGATGAAGAAGAGG  
CAGCCACCACCTCCGAGGTTTTCCCCCCTTCTCCCATGGCGTCTCGACTGCGGGAAAGGAGAGACCTCCCGCAGCGGAC  
TCCACCTCCTCCCAGGCATTCCCCTCCGTATGGGGGAGATGGCCAGCTTCAGTACTGGCCGTTTTCTCTCTCTGACTT  
ATATAATTGGAAAAATAATAACCTTCTCTTTCTGAAGATCCAGGTAAATTGACGGCCTTGATTGAGTCCGTCTCATCA  
CCCACCAGCCCACCTGGGACGACTGTCAGCAGTTGTTGGGGACCCTGCTGACCGGAGAAGAAAAGCAGCGGGTGCTCCTA  
GAGGCTAGAAAGGCAGTCCGGGGCAATGATGGACGCCCCACTCAGTTGCCTAATGAAATCAATGCTGCCTTTCCCTTGA  
GCGCCCTGATTGGGATTACACCACTACAGAAGGTAGGAACCACCTAGTCCTCTATCGCCAGTTGCTCTTAGCGGGTCTCC  
AAAACGCGGGCAGAAGCCCCACCAATTTGGCCAAGGTAAAAGGGATAACCCAGGGACCTAATGAGTCTCCCTCAGCCTTT  
TTAGAGAGACTCAAGGAGGCCTATCGCAGGTACACTCCTTATGACCCTGAGGACCCAGGGCAAGAAACCAATGTGTCTAT  
GTCATTATCTGTCAGTCTGCCCCGATATCGGGCGAAAGTTAGAGCGGTTAGAAGATTTAAAGAGCAAGACCTTAGGAG  
ACTTAGTGAGGGAAGCTGAAAAGATCTTTAATAAACGAGAAACCCCGGAAGAAAGAGAGGAACGTATCAGGAGAGAAACA  
GAGGAAAAAGAAGAACGCCGTAGGGCAGAGGATGAGCAGAAAGAGAAAGAAAGGGACCGCAGAAGACATAGAGAGATGAG  
CAAGCTCTTGGCCACTGTAGTTATTGGTCAGAGACAGGATAGACAGGGGGGAGAGCGGAAGAGGGCCCCAACTTGATAAGG  
ATCAATGCGCCTACTGCAAAGAAAAGGGACACTGGGCTAAAGACTGCCCAAAGAAGCCACGAGGCCCCGAGGACCGAGG  
CCCCAGACCTCCCTCCTGACCTTAGGTGACTAGGGAGGTGAGGTCAGGAGCCCCCCCCCTGAACCCAGGATAACCTCAA  
AGTCGGGGGGCAACCCGTACCTTCTGGTAGATACTGGGGCCCAACATTCCGTGCTGACCCAAAATCCTGGACCCCTAA  
GTGACAAGTCTGCCTGGGTCCAAGGGGCTACTGGAAGAAAGCGGTATCGCTGGACCACGGATCGCAAAGTACATCTAGCT  
ACCGGTAAGGTACCCACTCTTTCTCCATGTACCAGACTGCCCCCTATCCTCTGCTAGGAAGAGATTTGCTGACTAACT  
AAAAGCCCCAATCCACTTTGAGGGATCAGGAGCTCAGGTTGTGGGACCAATGGGACAGCCCCCTGCAAGTGCTGACCCTAA  
ACATAGAAGATGAGTATCGGCTACATGAGACCTCAAAGAGCCGGATGTTTTCTCTAGGGTCCACATGGCTTTCTGATTTT  
CCCCAGGCCTGGGCGGAAACCGGGGGCATGGGACTGGCAGTTGCGCAAGCTCCTCTGATCATACCTCTGAAGGCAACCTC  
TACCCCCGTGTCCATAAAACAATAACCCATGTACACAAGAAGCCAGACTAGGGATCAAGCCCCACATACAGAGACTGTTGG  
ACCAGGAATACTGGTACCCTGCCAGTCCCCCTGGAACACGCCCCCTGCTACCCGTTAAGAAACCAGGGACTAATGATTAC  
AGGCCTGTCCAAGATCTGAGAGAAGTCAACAAGCGGGTGGAAGACATCCACCCACCGTGCCCAACCCCTTACAACCTCTT  
GAGCGGGCTCCACCGTCCACCAAGTGGTACACTGTGCTTGACTTAAAGGATGCCTTTTTCTGCCTGAGACTCCACCCCA  
CCAGTCAGCCTCTCTTCGCCTTTGAGTGGAGAGACCCAGAGATGGGAATCTCAGGACAATTAACCTGGACCAGACTCCCA  
CAGGGTTTTCAAAAACAGTCCCACCCTGTTTAAATGAGGCACTGCACAGAGACCTAGCAGGCTTCCGGATCCAGCACCCAGA  
CTTGATCCTGCTACAGTACGTGGATGACTTACTGCTGGCCGCCACTTCTGAGCTCGACTGCCAACAAGGTACTCGGGCCC  
TGTTACAAACCTTAGGGGACCTCGGGTATCGGGCCTCGGCCAAGAAAGCCCAAATTTGCCAGAAACAGGTCAAGTATCTG  
GGGTATCTCCTAAAAGAGGGTCAGAGATGGCTGACTGAGGCCAGAAAAGAGACTGTGATGGGGCAGCCTACTCCGAAGAC  
CCCTCGACAATAAGGGAGTTCTTAGGGACGGCAGGCTTCTGTGCGCTCTGGATCCCTGGATTTGCAGAAATGGCAGCCC  
CCTTGTACCCTCTCACAAAACGGGGACTCTGTTTAAATTGGGGCCAGACCAGCAAAGGCCCTATCAAGAAATCAAACAG  
GCTCTTTAACTGCCCCAGCCCTGGGATTGCCAGATTTGACTAAGCCCTTTGAACTCTTTGTCGACGAGAAGCAGGGCTA  
CGCCAAAGGCGTCCTAACGCAAAAACCTGGGACCTTGGCGTCGGCCGGTGGCCTACCTGTCCAAAAGCTAGACCCAGTGG  
CAGCTGGGTGGCCCCCTTGCTACGGATGGTAGCAGCCATTGCCGTTCTGACAAAGGATGCAGGCAAGCTAACTATGGGA  
CAGCCGCTAGTCATTCTGGCCCCCATGCGGTAGAAGCACTGGTCAAACAACCCCCCTGACCGCTGGCTATCCAATGCTCG  
CATGACTCACTATCAGGCAATGCTCCTAGATACGGACCGAGTTCAGTTCCGACCGGTGGTAGCCTTAAACCCGGCCACGT  
TGCTCCCCTTGCCGGGAAAGAGACCCCCACGACTGCCTCGAGATCTTGGCTGAGACACACGGCACCAGACCGGACCTC  
ACGGACCAGCCCCCTCCCAAATGCCGACCACACCTGGTATACAGATGGAAGCAGCTTCTGTCAGGAGGGGCAACGTAAGGC  
TGGAGCAGCGGTGACCACCGAGACCGAGGTAATCTGGGCCAAGGCGTTGCCAGCCGGGACATCCGCCCAGCGAGCTGAAC  
TAATAGCACTCACCCAGGCCCTAAAGATGGCAGAAGGTAAGAAGCTAAATGTTTATACTGATAGCCGCTATGCCTTTGCT  
ACCGCCCATGTCCATGGAGAAATATATAGGAGACGTGGGTGCTCACCTCAGAAGGCAAGGAGATCAAGAACAAGGGCGA  
AATCTTGGCCTTACTGAAAGCTCTCTTTCTGCCAAAAGACTCAGTATAATTCAGTCCCAGGACATCAGAAAGGCAATA  
GTGCTGAAGCTAAAGGCAACCGAATGGCGGACCAGGCAGCCCGGAAGCAGCCATGGGGACTGACACAAAGGCCTCCTCA

CTTCTCATAGAGACCTCAACCCCGTACACTCCAGACTTCTTCCATTATACTGAAACAGATATAAAGAACCTACAAGAGTT  
GGGAGCCACATATGATAGAGAGAAAAAATATTGGGTCTGCAAGGTAAACCTGTGATGCCTGACCAGTTACCTTTGAAT  
TATTAGACTTCCTTCACCAGCTCACCCACCTTAGCTATCAGAAGATGAGGGCACTTCTAGACAGAAAAGAAAGCCCCTAT  
TACATGCTAAATAAAGATAAGATCCTCCACGAGGTGGCGGAATCATGCCAAGCCTGTGTCCAAGTAAATGCCAGTAAAGC  
TAAGGTCGGTCCCAGGTGCGAGTAAGAGGACATCGACCAGGCACCCATTGGGAAATTGACTTTACTGAAGTAAGGCCCG  
GACTGTATGGGTATAAGTATCTTCTGGTGTGTTGTGGACACGTTCTCTGGCTGGGTGGAAGCCTTCCCAACCAAGCATGAG  
ACTGCCAAAGTTGTGACCAAAAAGCTTCTAGAAGAAATATTTCCAAGGTTTGAATGCCCAAGTATTGGGGACTGATAA  
TGGGCCTGCCTTCGTCTCCAGGTAAGTCAGTCGGTGGCCAAGCTACTGGGGATTGATTGGAAACTACATTGTGCTTACA  
GACCCAGAGTTTCAGGTCAGGTAGAAAGAATGAATAGGACAATCAAGGAGACTTTGACCAAATTAACGCTTGCAACTGGC  
ACTAGAGACTGGGTACTCCTACTTCCCTTGGCCCTCTACCGAGCCGCAACACTCCGGGCCCATGGACTCACTCCGTA  
TGAAATCCTGTATGGGGCGCCACCGCCCTTGTTAATTTCCATGATCCTGAAATGTCAAAGTTTACTAATAGCCCCTCTC  
TCCAAGCTCACTTACAGGCCCTCCAAGCAGTACAACGAGAGGTCTGGAAGCCTCTGGCCGCTGCCTATCAGGACCAACAA  
GACCAGCTTGTGATACCACACCCCTTCCGTGTGCGCGACACCGTGTGGGTACGCCGGCACCAGACTAAGAACTTGAAC  
TCGCTGGAAGGACCCTACACCGTCTGTGACCACCCCCACCGCTCTCAAAGTAGACGGCATCGCTGCGTGGATCCACG  
CCGCTCACGTAAAAGCGGCGACAACCCCTCCGGCCGGAACAGCATCAGGACCGACATGGAAGGTCCAGCGTTCTCAAAAC  
CCCTTAAAGATAAGATTAACCCGTGGGCCCCCTGATAGTCTTGGGGATCTTAATAAGGGCAGGAGTATCAGTACCACAT  
GACAGCCCTCATCAGGTCTTCAATGTTACTTGGAGAGTTACCAACTTAATGACAGGACAAACAGCTAATGCTACCTCCCT  
CCTGGGGACAATGACCGATGCCTTTCCCAAAGTGTACTTTGACTTGTGCGATTTAATAGGGGACGACTGGGATGAGACTG  
GACTCGGGTGTGCGACTCCCGGGGAAGAAAAGGGCAAGAACATTTGACTTCTATGTTTGGCCCGGGCATACTGTACCA  
ACAGGGTGTGGAGGCCCGAGAGAGGGCTACTGTGGCAAATGGGGCTGTGAGACCACTGGACAGGCATACTGGAAGCCATC  
ATCATCATGGGACCTAATTTCCCTTAAGCGAGGAAACACCCCTCGGAATCAGGGCCCCCTGTTATGATTCTCAGCGGTCT  
CCAGTGGCATCCAGGGTGCCACACAGGGGGGTGCGATGCAATCCCTTAGTCTTAGAATTCAGTGACGCGGGTAAAAAGGCC  
AGCTGGGATGGCCCCAAAGTATGGGGACTAAGACTGTACCGATCCACAGGAACCGACCCGGTGACCCGGTTCTCTTTGAC  
CCGCCAGGTCTCAATATAGGGCCCCGCATCCCCATTGGGCCTAATCCCGTGATCACTGACCAGTTACCCCCCTCCCGAC  
CCGTGCAGATTATGCTCCCCAGGCCTCCTCAGCCTTCCCCTACAGGCGCAGCCTCTATACAACCTGGGACGGGAGACAGA  
CTGCTGAACCTGGTAGATGGAGCCTACCAAGCACTCAACCTCACCAGTCTTGACAAAACCAAGAGTGTGGTTGTGTCT  
GGTATCGGGACCCCCCTATTACGAAGGGGTTGCCGTCTTAGTACCTACTCCAACCATACTCTGCCCCAGCTAACTGCT  
CCGTGGCCCTCCCAACACAAGCTGACCCTGTCCGAAGTACCCGACAGGACTCTGCGTAGGAGCAGTTCCCAAAACCCAT  
CAGGCCCTGTGTAATACCACCCAGAATACAAGCGACGGGTCTACTACTGTGGCTGCTCCCGCCGGGACCAATTTGGGCTTG  
CAACACCGGGCTCACTCCCTGCCTATCTACTACTGTACTCAACCTCACCACCGATTACTGTGTCTGGTTGAGCTCTGGC  
CAAAGGTGACCTACCCTCCCTGGTTATGTTTATGGCCAGTTTGAAGAGAAAACCAAATATAAAAGAGAGCCGGTGTCA  
TTAACTCTGGCCCTGCTGTTGGGAGGACTTACTATGGGCGGCATAGCTGCAGGAGTAGGAACAGGGACTACAGCCCTAGT  
GGCCACCAAGCAATTCGAGCAGCTCCAGGCAGCCATACATACAGACCTTGGGGCCTTAGAAAAATCAGTCAGTGCCCTAG  
AAAAGTCTCTGACCTCGTTGTCCGAGGTGGTCTACAGAACCGGAGAGGATTAGATCTACTGTTCTAAAAGAAGGAGGA  
TTATGTGCTGCCCTAAAAGAAGAATGCTGTTTCTACGCGGACCACACTGGCGTAGTGAGAGATAGCATGGCAAAGCTAAG  
AGAAAGGTTAAACCAGAGACAAAAATTGTTTGAATCAGGACAAGGGTGGTTTGAAGGACTGTTTAAACAGGTCCCATGGT  
TCACGACCTTGATATCCACCATTATGGGCCCTTGATAATACTCTTATTAATCCTACTCTTCGGACCCCTGTATTCTCAAC  
CGCTTGGTCCAGTTTGTAAAAGACAGAATTTCCGGTGGTGCAGGCCCTGGTTCTGACCCAACAGTATACCAACTCAAATC  
AATAGGTCCAGAAGAAGTGAATCACGTGAATAAAAGATTTTATTAGTTTCCAGAAAGAGGGGGGAATGAAAGACCCCA  
CCATAAGGCTTAGCAAGCTAGCTGCAGTAACGCCATTTTGAAGGCATAAAAAAGTACCAGAGCTGGGTTCTCAAAAGT  
TACAAGGAAGTTCAGTTATAGATTAACAGTTAAAGATCAAGACTGAATAGCACTGGGACAGGGGCCGAACAGGATATCGG  
TGGTCAAGCACCTGGGCCCGGCTCAGGGCCAAGAATAGATGGTTCTCAGATAAAGCGGAACAGCAACAGACACAGAAG  
CCCCGATAGACGTCAAGTGTAGCAGAACTAGCTTCACTGATTTAGAAAAATAGAGGTGCACAGTGTCTGGTCACTCCTT  
GAACCTGTGTGTCTGCCAATGTTCTGACCTGATATGTGCCCATTTGCTGAACCTTCATTAGACTCTTTCCTTGTACCCCTC  
CCCTACCCATTTCTTGAAAATAGACATTGTTTAGATCTAAAAAGTCCCACCTCAGTTTCCCCAAATGACCCGGGAAGTACC  
CCAAACCTTATTGAACTAACCAACCAGCTCGCTTCTCGCTTCTGTAACCACGCTTTTGTCTCCCGACCCCTAGCCCTAT  
AAAAAGGGTAAAAACTCCACACTCGGCGCGCCAGTCTCCGATAGACTGAGTCGCCCGGGTACCCGTGTTCCCAATAAAG  
CCTCTTGCTGTTTACATCCGAATCGTGGACTCGCTGATCCTGGGAGGGTCTCCTCAGATTGATTGACTGCCACCTGGG  
GGGGGGGTCTTTCA

>Mpmv7

TAAAAGACCCCACCATAAGGCTTAGCAAGCTAGCTGCAGTAACGCCATTTTGAAGGCATGAAAAAGTACCAGAGCTGGG  
TTCTCAAAAGTTACAAAGAAGTTCAGTTATAGATTAACAGTTAAAGATCAAGGCTGAATAGCACTGGGACAGGGGCCGAA  
CAGGATATCGGTGGTCAAGCACCTGGGCCCGGCTCAGGGCCAAGAACAGATGGTTCTCAGATAAAGCGGAACAGCAAC  
AGACACAGAAGCCCCGATAGACGTCAAGTGTAGCAGAACTAGCTTCACTGATTTAGAAAAATAGAGGTGCACAGTGTCT  
GGTCACTCCTTGAACCTGTGTGTCTGCCAATGTTCTGACCAGATATGTGCCCATTTGCTGAACCTTCATTAGACTCTTTCC  
TTGTACCCCTCCCCTACCCATTTCTTGAAAATAGACATTGTTTGAATCTAAAAAGTCCCACCTCAGTTTCCCCAAATGAC  
CGGGAAGTACCCCAACCTTATTTCGAATAACCAACCAGCTCGCTTCTCGCTTCTGTAACCGCGCTTTTTGCTCCCCAGC

CCTAGCCCTATAAAAAGGGTAAAACTCCACACTCGGCGCGCCAGTCTCTCCGATAGACTGAGTCGCCCCGGGTACCCGTGT  
TCCCAATAAAGCCTCTTGCTGTTTACATCCGAATCGTGGACTCGCTGATCCTTGGGAGGGTCTCCTCAGATTGATTGACT  
GCCACCTGGGGGGTCTTTCAATTTGGAGGTCCACCGAGATCAGGAGACCCCTGCCAGGGACCACCGACCCCCGCCGGG  
AGGTAAGCTGGCCAGCGGTCTGTTTTGTGTCTGTCTCTGTCTCCGTGCGTGTTTTGTGCCGGCATCTAATGTTTGCGCCTGC  
GTCTGTACTAGTTGGCTAACTAGATCTGTATCTGGCGGTTCCGCGGAAGAACTGACGAGTTCGTATTCGCCGCCGACGCC  
CCTGGGAGACGTCCCAGCGGCCTCGGGGGCCCGTTTTGTGGCCATTCTGTATCAGTTAACCTACCCGAGTCGGACTTTT  
TGGAGCTCCGCCACTGTACGTGGCTTTGTTGGGGGACGAGAGACAGAGACACTTCCCGCCCCCGTCTGGATTTTTGCTTT  
CGGTTTTACGCCGAAACCGCGCTGCGCGTCTGATTTGTTTTATTGCTCTTTTGTTCCTCGTTAGTTTTTCTGTCTTTAA  
GTGTTTTCAAGATCATGGGACAGACCGTAACCTACCCCTCTGAGTCTAACCTTGCAGCACTGGGGAGATGTCACAGCGATT  
GCATCCAACAGTCTGTGGATGTCAGGAAGAGCGCTGGATTACCTTCTGTTCCGCCGAATGGCCAACTTTTCAATGTAGG  
ATGGCCTCAGGATGGTACTTTCAATTTAAGTATTATCTCTCAGGTTAAGTCTAGAGTGTTTTGTCTGGTCCCCACGGAC  
ACCCGGATCAGGTCCCATATATCGTTACCTGGGAGGCACTTGCCTATGACCCCCCTCCGTGGGTCAAACCGTTTGTCTCT  
CCTAAACCTCCTCCCTTGCCGACAGCTCCCGTCTCTCCCGCCCGGTCTTCTGCGCAACCTCCGTCCCGATCTGCCCTTTA  
CCCTGCCCTTACCCCCCTCTATAAAGTCCAAACCTCCTAAGCCCCAGGTTCTCCCTGATAGCGGCGGACCTCTCATTGACC  
TTCTCACAGAGGACCCCCCGCCGTACGGAGCACAACTTCTCCTCTGCCAGAGAGAACGATGAAGAAGAGGCGGCCACC  
ACCTCCGAGGTTTTCCCCCCTTCTCCCATGGCGTCTCGACTGCGGGGAAGGAGAGACCTCCCGCAGCGGACTCCACCTC  
CTCCCAGGCATTCCCCTCCGTATGGGGGGAGATGGCCAGCTTCAGTACTGGCCGTTTTCTCCTCTGACTTATATAATT  
GGAAAAATAATAACCTTCTCTTTCTGAAGATCCAGGTAAATTGACGGCCTTGATTGAGTCCGTCTCATCACCCACCAG  
CCCACCTGGGACGACTGTCAGCAGTTGTTGGGGACCTGCTGACCGGAGAAGAAAAGCAGCGGGTGCTCCTAGAGGCTAG  
AAAGGCAGTCCGGGGCAATGATGGACGCCCCACTCAGTTGCCTAATGAAATCAATGCTGCCTTTCCCTTGAGCGCCCTG  
ATTGGGATTACACCACTACAGAAGGTAGGAACCACCTAGTCCTCTATCGCCAGTTGCTCTTAGCGGGTCTCCAAAACGCG  
GGCAGAAGCCCCACCAATTTGGCCAAGGTAAAAGGGATAACCCAGGGACCTAATGAGTCTCCCTCAGCCTTTTTAGAGAG  
ACTCAAGGAGGCCTATCGCAGGTACACTCCTTATGACCCTGAGGACCCAGGGCAAGAAACCAATGTGTCTATGTCATTCA  
TCTGGCAGTCTGCCCCGATATCGGGCGAAAGTTAGAGCGGTTAAAAGATTTAAAGAGCAAGACCTTAGGAGACTTAGTG  
AGGGAAGCTGAAAAGATCTTTAATAAACGAGAAACCCCGGAAGAAAGAGAGGAACGTATCAGGAGAGAAACAGAGGAAAG  
AGAAGAACGCCGTAGGGCAGAGGATGAGCAGAAAGAGAAAGAAAGGGACCGCAGAAGACATAGAGAGATGAGCAAGCTCT  
TGGCCACTGTAGTTATTGGTCAGAGACAGGATAGACAGGGGGGAGAGCGGAAGAGGGCCCCAATTGATAAGGATCAATGC  
GCCTACTGCAAGAAAAGGACACTGGGCTAAAGACTGCCAAAGAACGCCACGAGGGCCCCGAGGACCGAGGCCCCAGAC  
CTCCCTCCTGACCTTAGGTGACTAGGGAGGTGAGGGTACAGGACCCCCCTGAACCCAGGATAACCTCAAAGTCGGGG  
GGCAACCCGTACCTTCTGGTAGATACTGGGGCCCAACACTCCGTGCTGACCCAAAATCCTGGACCCCTAAGTGACAAG  
TCTGCCTGGGTCCAAGGGGCTACTGGAGGAAAGCGGTATCGCTGGACCACGGATCGCAAAGTGCATCTAGCTACCGGTAA  
GGTCACCCACTCTTTCTCCATGTACCAGACTGCCCCATCCTCTGCTAGGAAGAGATTTGCTGACTAAACTAAAAGCCC  
AAATCCACTTTGAGGGATCAGGAGCTCAGGTTGTGGGACCAATGGGACAGCCCCCTGCAAGTGTGACCCCTAAACATAGAA  
GATGAGTATCGGCTACATGAGACCTCAAAGAGCCGGATGTTTTCTTAGGGTCCACATGGCTTTCTGATTTTCCCCAGGC  
CTGGGCGGAAACCGGGGGCATGGGACTGGCAGTTTCGCCAAGCTCCTCTGATCATACCTCTGAAGGCAACCTCTACCCCCG  
TGTCATATAAAACAATAACCCATGTACACAAGAAGCCAGACTGGGGATCAAGCCCCACATACAGAGACTGTTGGACCAGGGA  
ATACTGGTACCCTGCCAGTCCCCCTGGAACACGCCCCCTGCTACCCGTTAAGAAACCAGGGACTAATGATTACAGGCCTGT  
CCAAGATCTGAGAGAAGTCAACAAGCGGGTGGAAGACATCCACCCACCGTGCCCAACCTTACAACCTCTTGAGCGGGC  
TCCCACCGTCCCACAGTGGTACACTGTGCTTGACTTAAAGGATGCCTTTTTCTGCCTAAGACTCCACCCCCACAGTCAG  
CCTCTCTTGCCTTTGAGTGGAGAGACCCAGAGATGGGAATCTCAGGACAATTAACCTGGACCAGACTCCCACAGGGTTT  
CAAAAACAGTCCCACCCTGTTTGATGAGGCACTGCACAGAGACCTAGCAGGCTTCCGGATCCAGCACCCAGACTTGATCC  
TGCTACAGTACGTGGATGACTTACTGCTGGCCGCCACTTCTGAGCTCGACTGCCAACAAGGTACTCGGGCCCTGTTACAA  
ACCCTAGGGGACCTCGGGTATCGGGCCTCGGCCAAGAAAGCCCAAATTTGCCAGAAACAGGTCAAGTATCTGGGGTATCT  
TCTAAAAGAGGGTCAGAGATGGCTGACTGAGGCCAGAAAAGAGACTGTGATGGGGCTGCCTATTCCGAAGACCCCTCGAC  
AACTAAGAGAGTTCTTAGGGACGGCAGGCTTCTGTGCGCTCTGGATCCCTGGGTTTGCAGAAATGGCAGCCCCCTTGTA  
CCTCTCACAAAACGGGGACTCTGTTTAATTGGGGCCAGACACAGCAAAAGGCCTATCAAGAAATCAAACAGGCTCTTCT  
AACTGCCCCAGCCCTGGGGTTGCCAGATTTGACTAAGCCCTTTGAACCTTTGTGACGAGAGAAGCAGGGCTACGCCAAAG  
GCGTCCTAACGCAAAAACCTGGGACCTTGGCGTGGGCCGGTGGCCTACCTGTCCAAAAGCTAGACCCAGTGGCAGCTGGG  
TGGCCCCCTTGCTACGGATGGTAGCAGCCATTGCCGTTCTGACAAAGGATGCAGGCAAGCTAACTATGGGACAGCCGCT  
AGTCATTCTGGCCCCCATGCGGTAGAAGCACTGGTCAAACAACCCCTGACCGCTGGCTATCCAATGCTCGCATGACCC  
ACTATCAGGCAATGCTCCTAGATACGGACCGAGTTGAGTTCGGACCGGTGGTAGCCTTAAACCCGGCCACGTTGCTCCCC  
TTGCCGGGAAAAGAGACCCCCACGACTGCCTCGAGATCTTGGCTGAGACACACGGCACCCAGACCGGACCTCACGGACCA  
GCCCCCTCCCAAATGCCGACCACACCTGGTATACAGATGGAAGCAGCTTCTGTCAGGAGGGGCAACGTAAGGCTGGAGCAG  
CGGTGACCACCGAGACCGAGGTAATCTGGGCCAAGGCGTTGCCAGCCGGGACATCCGCCCAGCGAGCTGAACTAATAGCA  
CTACCCAGGCCCTAAAGATGGCAGAAGGTAAGAAGCTAAATGTTTATACTGATAGCCGCTATGCCTTTGCTACCGCCCA  
TGTCCATGGAGAAATATATAGGAGACGTGGGTTGCTCACCTCAGAAGGCAAGGAGATCAAGAACAAGGGCGAAATCTTGG  
CCTTACTGAAAGCTCTCTTTCTGCCAAAAGACTCAGTATAATTAAGTCTGCCCAGGACATCAGAAAGGCAATAGTGCTGAA

GCTAAAGGCAACCGAATGGCGGACCAGGCAGCCCGGGAAGCAGCCATGGGGACTGACACAAAGGCCTCCTCACTTCTCAT  
AGAGACCTCAACCCCGTACACTCCAGACTTCTTCCATTATACTGAAACAGATATAAAGAACCTACGAGAGTTGGGAGCCA  
CATATGATAGAGAGAAAAAATATTGGGTCTGCAAGGTAAACCTGTGATGCCTGACCAGTTCACCTTTAAATTATTAGAC  
TTCCTTACCAGCTCACCCACCTTAGCTATCAGAAGATGAGGGCACTTCTAGACAGAAAAGAAAGCCCTATTACATGCT  
AAATAAAGATAAGATCCTCCACGAGGTGGCGGAATCATGCCAAGCCTGTGTCCAAGTAAATGCCAGTAAAGCTAAGGTCTG  
GTCCCGGGGTGCGAGTAAGAGGACATCGACCAGGCACCCATTGGGAAATTGACTTTACTGAAGTAAGGCCCGGACTGTAT  
GGGCATAAGTATCTTCTGGTGTGTTGTGGACACGTTCTCTGGCTGGGTGGAAGCCTTCCCAACCAAGCATGAGACTGCCAA  
AGTTGTGACCAAAAAGCTTCTAGAGAATAAATAGGACAATCAAGGAGACTTTGACCAAATTAACGCTTGAACCTGGCACTAGAGA  
AGTTCAAGGTGAGGTAGAAAAGATAAATAGGACAATCAAGGAGACTTTGACCAAATTAACGCTTGAACCTGGCACTAGAGA  
CTGGGTACTCCTACTTCCCTTGGCCCTCTACCGAGCCCGCAACACTCCGGGCCCCCATGGACTCACTCCGTATGAAATCC  
TGTATGGGGCGCCCCGCCCTTGTTAATTTCCATGATCCTGAAATGTCAAAGTTTACTAATAGCCCCTCTCTCCAAGCT  
CACTTACAGGCCCTCCAAGCAGTACAACGAGAGGTCTGGAAGCCTCTGGCCGCTGCCTATCAGGACCAACAAGACCAGCC  
TGTGATACCACACCCCTTCCGTGTGCGCGACACCGTGTGGGTACGCCGGCACCAGACTAAGAACTTGGAACCTCGCTGGA  
AAGGACCCTACACCGTCTGTGACCACCCCCACCGCTCTCAAAGTAGACGGCATCGCTGCGTGGATCCACGCCGCTCAC  
GTAAAAGCGGCGACAACCCCTCCGGCCGGAACAGCATCAGGACCGACATGGAAGGTCCAGCGTTCTCAAAACCCCTTAAA  
GATAAGATTAACCCGTGGGCCCCCTGATAGTCTTGGGGATCTTAATAAGGGCAGGAGTATCAGTACCACATGACAGCCC  
TCATCAGGTCTTCAATGTTACTTGGAGAGTTACCAACTTAATGACAGGACAAACAGCTAATGCTACCTCCCTCCTGGGGA  
CAATGACCGATGCCTTTCCCAAAGTGTACTTTGACTTGTGCGATTTAATAGGGGACGACTGGGATGAGACTGGACTCGGG  
TGTGCACTCCCGGGGAAGAAAAGGGCAAGAACATTTGACTTCTATGTTTGGCCCGGCATACTGTACCAACAGGGTG  
TGGAGGCCCGAGAGAGGGTACTGTGGCAAATGGGGCTGTGAGACCCTGGACAGGCATACTGGAAGCCATCATCATCAT  
GGGACCTAATTTCCCTTAAGCGAGGAAACACCCCTCGGAATCAGGGCCCCCTGTTATGATTCTCAGCGGTCTCCAGTGGC  
ATCCAGGGTGCCACACCGGGGGGTGATGCAATCCCTTAGTCTTAGAATTAAGTACGCGGGTAAAAAGGCCAGCTGGGA  
TGGCCCCAAAGTATGGGGACTAAGACTGTACCGATCCACAGGAACCGACCCGGTGACCCGGTTCTCTTTGACCCGCCAGG  
TCCTCAATATAGGGCCCCGCATCCCCATTGGGCCTAATCCCGTGATCACTGACCAGTTACCCCCCTCCCGACCCGTGCAG  
ATCATGCTCCCCAGGCCTCCTCAGCCTTCCCCTACAGGCGCAGCCTCTATACAACCTGGGACGGGAGACAGACTGCTGAA  
CCTGGTACTGGAGCCTACCAAGCACTCAACCTCACCAGTCTTGACAAAACCAAGAGTGTGGTTGTGTCTGTTATCGG  
GACCCCTTATTAGAAGGGTTGCCGTCTTAGTACCTACTCAACCACTACCTCTGCCCCAGTACTGCTCCGTCCGTGGCC  
TCCCAACACAAGCTGACCCTGTCCGAAGTAACCGGACAGGACTCTGCGTAGGAGCAGTTCCCAAAACCCATCAGGCCCT  
GTGTAATACCACCCAGAATACAAGCGACGGGTCTACTATCTGGCTGCTCCCGCCGGGACCATTTGGGCTTGCAACACCG  
GGCTCACTCCCTGCCTATCTACTACTGTACTCAACCTCACCACCGATTACTGTGTCTGTTGAGCTCTGGCCAAAGGTG  
ACCTACCACTCCCCTGGTTATGTTTATGGCCAGTTTGAAAGAAAAACCAATATAAAAGAGAGCCGGTGTCAATTAACCTCT  
GGCCCTGCTGTTGGGAGGACTTACTATGGGCGGCATAGCTGCAGGAGTAGGAACAGGGACTACAGCCCTAGTGGCCACCA  
AGCAATTCGAGCAGCTCCAGGCAGCCATACATACAGACCTTGGGGCCTTAGAAAAATCAGTCAGTGCCCTAGAAAAGTCT  
CTGACCTCGTTGTCTGAGGTGGTCTACAGAACCGGAGAGGATTAGATCTACTGTTCTAAAAGAAGGAGGATTATGTGC  
TGCCCTAAAAGAAGAATGCTGTTTCTACGCGGACCACACTGGCGTAGTGAGAGATAGCATGGCAAAGCTAAGAGAAAGGT  
TAAACCAGAGACAAAAATTGTTTGAATCAGGACAAGGGTGGTTTGGGGACTGTTTAAACAGGTCCCATGGTTACAGACC  
TTGATATCCACCATTATGGGCCCTTGATAATACTCTTATTAATCCTACTCTTCGACCCCTGTATTCTCAACCGCTTGGT  
CCAGTTTGTAAGACAGAATTTCCGGTGGTGCAGGCCCTGGTTCTGACCCAACAGTATACCAACTCAAATCAATAGGTC  
CAGAAAAAGTGGAATCACGTGAATAAAAGATTTTATTAGTTTCCAGAAAGAGGGGGGAATAAAAGACCCCACCATAAGG  
CTTAGCAAGCTAGCTGCAGTAACGCCATTTTGCAAGGCATAAAAAAGTACCAGAGCTGGGTTCTCAAAAGTTACAAAGAA  
GTTTCAGTTATAGATTAACAGTTAAAGATCAAGGCTGAATAGCACTGGGACAGGGGCCGAACAGGATATCGGTGGTCAAGC  
ACCTGGGCCCCGGCTCAGGGCCAAGAACAGATGGTTCTCAGATAAAGCGGAACCAGCAACAGACACAGAAGCCCCGATAG  
ACGTCAGTGTTAGCAGAACTAGCTTCACTGATTTAGAAAAATAGAGGTGCACAGTGCTCTGGTCACTCCTTGAACCTGTG  
TGTCTGCCAATGTTCTGACCAGATATGTGCCATTGCTGAACCTTCATTAGACTCTTTCCTTGTACCCCTCCCCTACCCA  
TTTCTTGAAAATAGACATTGTTTAGATCTAAAAAGTCCCACCTCAGTTTCCCCAAATGACCGGGAAGTACCCCAACCTT  
ATTGAACTAACCAACCAGCTCGCTTCTCGCTTCTGTAACCGCGCTTTTGTCTCCCGAGCCCTAGCCCTATAAAAAAGGGT  
AAAAACTCCACACTCGGCGCGCCAGTCTCCGATAGACTGAGTCGCCCCGGGTACCCGTGTTCCCAATAAAGCCTCTTGCT  
GTTTACATCCGAATCGTGGACTCGCTGATCCTTGGGAGGGTCTCCTCAGATTGATTGACTGCCACCTGGGGGGTCTTTC

A

>Mpmv8

TGAAAGACCCCACCATAAGGCTTAGCAAGCTAGCTGCAGTAACGCCATTTGCAAGGCATGAAAAAGTACCAGAGCTGGG  
TTCTCAAAAGTTACAAGGAAGTTCAAGTTATAGATTAACAGTTAAAGATCAAGGCTGAATAGCACTGGGACAGGGGCCGAA  
CAGGATATCGGTGGTCAAGCACCTGGGCCCCGGCTCAGGGCCAAGAACAGATGGTTCTCAGATAAAGCGGAACCAGCAAC  
AGACACAGAAGCCCCGATAGACGTAGTGTAGCAGAACTAGCTTCACTGATTTAAAAAATAGAGGTGCACAATGCTCT  
GGTCACTCCTTAAACCTGTGTGTCTGCCAATGTTCTGACCAGATATGTGCCATTGCTGAACCTTCATTAGACTCTTTC  
TTGTACCCCTCCCCTACCCATTTCTTGAAAATAGACATTGTTTATAGATCTAAAAAGTCCCACCTCAGTTTCCCCAAATGAC

CGGGAAGTACCCCAAACCTTATTTCGAACCTAACCAACCAGCTCGCTTCTCGCTTCTGTAACCACGCTTTTTTGCTCCCCAGC  
CCTAGCCCTATAAAAAGGGTAAAACTCCACACTCGGCGCGCCAGTCTCTCCGATAGACTGAGTCGCCCCGGGTACCCGTGT  
TCCCAATAAAGCCTCTTGCTGTTTACATCCGAATCGTGGACTCGCTGATCCTTGGGAGGGTCTCCTCAGATTGATTGACT  
GCCCACCTGGGGGGTCTTTTCATTTGGAGGTTCCACCGAGATCAGGAGACCCCTGCCAGGGACCACCGACCCCCGCCGGG  
AGGTAAGCTGGCCAGCGGTCTGTTTCGTGTCTGTCTCTGTCTCCGTGCGTGTGTTGTGCCGGCATCTAATGTTTGCGCCTGC  
GTCTGTACTAGTTGGCTAACTAGATCTGTATCTGGCGGTTCCGCGGAAGAACTGACGAGTTCGTATTCGCCGCCGACGCC  
CCTGGGAGACGTCCCAGCGGCCTCGGGGGCCCGTTTTGTGGCCATTCTGTATCAGTTAACCTACCCGAGTCGGACTTTT  
TGGAGCTCCGCCACTGTACGTGGCTTTGTTGGGGGACGAGAGACAGAGACACTTCCCGCCCCCGTCTGGATTTTTGCTTT  
CGTTTTTACGCCGAAACCGCGCTGCGCGTCTGATTTGTTTTATTGCTCTTTTGTTCCTTCGTTAGTTTTTTTTCTGTCTTTA  
AGTGTTTTTCAAGATCATGGGACAGACCGTAACCTACCCCTCTGAGTCTAACCTTGACGACTGGGGAGATGTCCAGCGCAT  
TGCATCCAACCAGTCTGTGGATGTCAGGAAGAGGCGCTGGATTACCTTCTGTTCCGCCGAATGGCCAACCTTCAATGTAG  
GATGGCCTCAGGATGGTACTTTCAATTTAAGTATTATCTCTCAGGTTAAGTCTAGAGTGTTTTGCTCTGGTCCCCACGGA  
CACCCGGATCAGGTCCCATATATCGTTACCTGGGAGGCATTGCCTATGACCCCCCTCCGTGGGTCAAACCGTTTTGTTTC  
TCCTAAACCTCCTCCCTTGCCGACAGCTCCCGTCTCCCGCCCGGTCTTCTGCGCAACCTCCGTCCCGATCTGCCCTTT  
ACCCTGCCCTTACCCCTCTATAAAGTCCAAACCTCCTAAGCCCCAGGTTCTCCCTGATAGCGCGGACCTCTCATTGAC  
CTTCTCACAGAGGACCCCCCGCCGTACGGAGCACAACCTTCTCCTCTGCCAGAGAGAACGATGAAGAAGAGGCGGCCAC  
CACCTCCGAGGTTTTCCCCCTTCTCCCATGGCGTCTCGACTGCGGGGAAGGAGAGACCTCCCGCAGCGGACTCCACCT  
CCTCCCAGGCATTTCCCACTCCGTATGGGGGGAGATGGCCAGCTTCAGTACTGGCCGTTTTCTCCTCTGACTTATATAAT  
TAAAAAATAATAACCTTCTTTTTCTGAAGATCCAGGTAAATTGACGGCCTTGATTGAGTCCGTCTCATACCCACCA  
GCCCACCTGGGACGACTGTGAGCAGTTGTTGGGGACCCTGCTGACCGGAGAAGAAAAGCAGCGGGTGCTCCTAGAGGCTA  
GAAAGGCAGTCCGGGGCAATGATGGACGCCCCACTCAGTTGCCTAATGAAATCAATGCTGCCTTTCCCTTGAGCGCCCT  
GATTGGGATTACACCACTACAGAAGGTAGGAACCACCTAGTCTCTATCGCCAGTTGCTCTTAGCGGGTCTCCAAAACGC  
GGGCAAGCCCCACCAATTTGGCCAAGGTAAAAGAGATAACCCAGGGACCTAATGAGTCTCCCTCAGCCTTTTTAGAGA  
GACTCAAGGAGGCCTATCGCAGGTACACTCCTTATGACCCTGAGGACCCAGGGCAAGAAACCAATGTGTCTATGTCATT  
ATCTGGCAGTCTGCCCCGGATATCGGGCGAAAGTTAGAGCGGTTAGAAGATTTAAAGAGCAAGACCTTAGGAGACTTAGT  
GAGGGAAGCTGAAAAGATCTTTAATAAACGAGAAACCCCGGAAGAAAGAGAGGAACGTATCAGGAGAGAAACAGAGGAAA  
AAGAAGAACGCTGTAGGACAGAGGATGAGCAGAAAGAGAAAGAAAGGACCCGAGAAGACATAGAGAGATGAGCAAGCTC  
TTGGCCACTGTAGTTATTGCTCAGAGACAGGATAGACAGGGGGGAGAGCGGAAGAGGCCCCAACCTTGATAAGGATCAATG  
CGCCTACTGCAAAGAAAAGGGACACTGGGCTAAAGACTGCCCAAAGAAGCCACGAGGGCCCCGAGGACCGAGGCCCCAGA  
CCTCCCTCCTGACCTTAGGTGACTAGGGAGGTGAGGGTACGAGGACCCCCCTGAACCCAGGATAACCTCAAAGTCGGG  
GGGCAACCCGTACCTTCTGGTAGATACTGGGGCCCAACACTCCGTGCTGACCCAAAATCTTGGACCCCTAAGTGACAA  
GTCTGCCTGGGTCCAAGGGGCTACTGGAGGAAAGCGGTATCGCTGGACCACGGATCGCAAAGTGCATCTAGCTACCGGTA  
AGGTACCCACTCTTTCTCCATGTACCAGACTGCCCCTATCCTCTGCTAGGAAGAGATTTGCTGACTAACTAAAAGCC  
CAAATCCACTTTGAGGGATCAGGAGCTCAGGTTATGGGACCAATGGGACAGCCCTGCAAGTGTGACCCCTAAACATAGA  
AGATGAGTATCGGCTACATGAGACCCCAAAAGAGCCGGATGTTTCTCTAGGGTCCACATGGCTTTCTGATTTTCCCCAGG  
CCTGGGCGGAAACCGGGGCGATGGGACTGGCAGTTCCGCAAGCTCCTCTGATCATACTCTGAAGGCAACCTCTACCCCC  
GTGTCCATAAAACAATACCCCATGTCAAGAAGCCAGACTGGGGATCAAGTCCCACATACAGAGACTGTTAGACCAGGG  
AATACTGGTACCCTGCCAGTCCCCCTGGAACACGCCCCTGCTACCCGTTAAGAAACCAGGGACTAATGATTACAGGCCTG  
TCCAAGATCTGAGAGAAGTCAACAAGCGGGTGGAAGACATCCACCCACCCGTGCCCAACCCCTTACAACCTCTTGAGCGGG  
CTCCCACCGTCCCACCAGTGGTACACTGTGCTTGACTTAAAGGATGCCTTTTTCTGCCTGAGACTCCACCCACCAGTCA  
GCCTCTCTTCGCCTTTGAGTGGAGAGACCCAGAGATGGGAATCTCAGGACAATTAACCTGGACCAGACTCCCACAGGGTT  
TCAAAAACAGTCCCACCCTGTTTGATGAGGCACTGCACAGAGACCTAGCAGGCTTCCGGATCCAGCACCCAGACTTGATC  
CTGCTACAGTACGTGGATGATTTACTGCTGGCCGCCACTTCTGAGCTCGACTGCCAACAAGGTAAGTCTGGGGCCCTGTTACA  
AACCTTAGGGGACCTCGGGTATCGGGCCTCGGCCAAGAAAGCCCAAATTTGCCAGAAACAGGTCAAGTATCTGGGGTATC  
TTCTAAAAGAGGGTCAGAGATGGCTGACTGAGGCCAGAAAAGAGACTGTGATGGGGCAGCCTATTCCGAAGACCCCTCGA  
CAACTAAGGGAGTTCTTAGGGACGGCAGGCTTCTGTCGCTCTGGATCCCTGGGTTTGAGAAATGGCCGCCCCCTTGTA  
CCCTCTCACAAAACGGGGACTCTGTTTAATTGGGGCCAGACCAGCAAAAGGCCTATCAAGAAATCAAACAGGCTCTTC  
TAACTGCCCCAGCCCTGGGGTTGCCAGATTTGACTAAGCCCTTTGAACTCTTTGTGACGAGAGAAGCAGGGCTACGCCAAA  
GGCGTCTTAACGCAAAAACCTGGGACCTTGGCGTCGGCCGGTGGCCTACCTGTCCAAAAGCTAGACCCAGTGGCAGCTGG  
GTGGCCCCCTTGCTACGGATGGTAGCAGCCATTGCCGTTCTGACAAAGGATGCAGGCAAGCTAACTATGGGACAGCCGC  
TAGTCATTCTGGCCCCCATGCGGTAGAAGCACTGGTCAAACAACCCCTGACCGCTGGCTATCCAATGCTCGCATGACC  
CACTATCAGGCAATGCTCCTAGATACGGACCGGGTTTCAGTTCCGACCGGTGGTAGCCTTAAACCCGGCCACGTTGCTCCC  
CTTGCCGGGAAAAGAGACCCCCCACGACTGCCTCGAGATCTTGGCTGAGACACACGGCACAGACCGGACCTCACGGACC  
AGCCCCCTCCCAATGCCGACCACACCTGGTATACAGATGGAAGCAGCTTCTGTCAGGAGGGGCAACGTAAGGCTGGAGCA  
GCGGTGACCACCGAGACCGAGGTAATCTGGGCCAAGGCGTTGCCAGCCGGGACATCCGCCAGCGAGCTGAACCTAATAGC  
ACTCACCCAGGCCCTAAAGATGGCAGAAGGTAAGAAGCTAAATGTTTATACTGATAGCCGCTATGCCTTTGCTACCGCCC  
ATGTCCATGGAGAAATATATAGGAGACGTGGGTTGCTCACCTCAGAAGGCAAGGAGATCAAGAACAAGGGCGAAATCTTG

GCCTTACTGAAAGCTCTCTTTCTGCCCCAAAGACTCAGTATAATTCAGTCCCAGGACATCAGAAAGGCAATAGTGCTGA  
AGCTAAAGGCAACCGAATGGCGGACCAGGCAGCCCCGGAAGCAGCCATGGGGACTGACACAAAGGCCTCCTCACTTCTCA  
TAGAGACCTCAACCCCGTACACTCCAGACTTCTTCCATTATACTGAAACAGATATAAAGAACCTACGAGAGTTGGGAGCC  
ACATATGATAGAGAGAAAAAATATTGGGTCTTGCAAGGTAAACCTGTGATGCCTGACCAGTTCACCTTTGAATTATTAGA  
CTTCTTACCAGCTCACCCACCTTAGCTATCAGAAGATGAGGGCACTTCTAGACAGAAAAGAAAGCCCCCTATTACATGC  
TAAATAAAGATAAGATCCTCCACGAGGTGGCGGAATCATGCCAAGCCTGTGTCCAAGTAAATGCCAGTAAAGCTAAGGTC  
GGTCCCGGGGTGCGAGTAAGAGGACATCGACCAGGCACCCATTGGGAAATTGACTTTACTGAAGTAAGGCCCGGACTGTA  
TGGGCATAAGTATCTTCTGGTGTTTGTGGACACGTTCTCTGGCTGGGTGGAAGCCTTCCCAACCAAGCATGAGACTGCCA  
AAGTTGTGACCAAAAAGCTTCTAGAAGAAATATTTCCAAGGTTTGAATGCCCAAGTATTGGGGACTGATAATGGGCCT  
GCCTTCGTCTCCAGGTAAAGTCAGTCGGTGGCCAAGCTACTGGGGATTGATTGGAACTACATTGTGCTTACAGACCCCA  
GAGTTCAGGTCAAGTAAAAAGAATGAATAGGACAATCAAGGAGACTTTGACTAAATTAACGCTTGCAACTGGCACTAGAG  
ACTGGGTACTCCTACTTCCCTTGGCCCTCTACCGAGCCCGCAACACTCCGGGCCCCCATGGACTCACTCCGTATGAAATC  
CTGTATGGGGCGCCCCCGCCCCCTTGTTAATTTCCATGATCCTGAAATGTCAAAGTTTACTAATAGCCCCCTCTCTCCAAGC  
TCACTTACAGGCCCTCCAAGCAGTACAACGAGAGGTCTGAAAGCCTCTGGCCGCTGCCTATCAGGACCAACAAGACCAGC  
CTGTGATACCACACCCCTTCCGTGTGCGCGACACCGTGTGGGTACGCCGGCACCAGACTAAGAAGTTGGAACCTCGCTGG  
AAAGGACCCTACACCGTCTCTGCTGACCACCCCCACCGCTCTCAAAGTAGACGGCATCGCTGCGTGGATCCACGCCGCTCA  
CGTAAAAGCGGCGACAACCCCTCCGGCCGGAACAGCATCAGGACCGACATGGAAGGTCCAGCGTTCTCAAAACCCCTTAA  
AGATAAGATTAACCCGTGGGCCCCCCCTGATAGTCTCTGGGGATCTTAATAAGGGCAGGAGTATCAGTACCACATGACAGCC  
CTCATCAGGTCTTCAATGTTACTTGGAGAGTTACCAACTTAATGACAGGACAAACAGCTAATGCTACCTCCCTCCTGGGG  
ACAATGACCGATGCCTTTCCCAAAGTGTACTTTGACTTGTGCGATTTAATAGGGGACGACTGGGATGAGACTGGACTCGG  
GTGTGCGACTCCCGGGGGAAGAAAAAGGGCAAGAACATTTGACTTCTATGTTTGGCCCGGCATAGTGTACCAACAGGGT  
GTGGAGGCCCCGAGAGAGGGGCTACTGTGGCAAATGGGGCTGTGAGACCACTGGACAGGCATACTGGAAGCCATCATCATCA  
TGGGACCTAATTTCCCTTAAGCGAGGAAACACCCCTCGGAATCAGGGCCCCCTGTTATGATTCTCAGCGGTCTCCAGTGG  
CATCCAGGTGCCACACCGGGGGGTGATGCAATCCCCTAGTCCTAGAATTCAGTGACGCGGGTAAAAAGGCCAGCTGGG  
ATGGCCCCAAAGTATGGGGACTAAGACTGTACCGATCCACAGGAACCGACCCGGTGACCCGGTTCTCTTTGACCCGCCAG  
GTCCTCAATATAGGGCCCCGCATCCCCATTGGGCCTAATCCCGTGATCACTGACCAGTTACCCCCCTCCCGACCCGTGCA  
GATCATGTCTCCCCAGGCCTCCTCAGCCTTCCCCCTACAGGCGAGCCTCTATACAACCTGGGACGGGAGACAGACTGCTGA  
ACCTGGTAGATGGAGCCTACCAAGCACTCAACCTCACCAGTCCTGACAAAACCAAGAGTGCTGGTTGTGTCTGTGTCTCG  
GGACCCCCCTATTACGAAGGGGTTGCCGTCTAGGTACCTACTCCAACCATACCTCTGCCCCAGCTTAAGTCTCCGTGGC  
CTCCCAACACAAGCTGACCCTGTCCGAAGTAACCGGACAGGGACTCTGCGTAGGAGCAGTTCCCAAAACCCATCAGGCC  
TGTGTAATACCACCCAGAATACAAGCGACGGGTCTACTATCTGGCTGCTCCCGCCGGGACCATTGTTGGGCTTGCAACACC  
GGGCTCACTCCCTGCCTATCTACTACTGTACTCAACCTCACCACCGATTACTGTGTCTTGGTTGAGCTCTGGCCAAAGGT  
GACCTACCACTCCCCTGGTTATGTTTATGGCCAGTTTGGAGAGAAAAACCAATATAAAGAGAGCCGGTGTCTTAAGTCT  
TGGCCCTGCTGTTGGGAGGACTTACTATGGGCGGCATAGCTGCAGGAGTAGGAACAGGGACTACAGCCCTAGTGGCCACC  
AAGCAATTCGAGCAGCTCCAGGCAGCCATACATACAGACCTTGGGGCCTTAGAAAAATCAGTCAGTGCCTTAGAAAAGTC  
TCTGACCTCGTTGTCTGAGGTGGTCCTACAGAACCGGAGAAGATTAGATCTACTGTTCTTAAAGAAGGAGGATTATGTG  
CTGCCCTAAAAGAAGAATGCTGTTTCTACGCGGACCACACTGGCGTAGTGAGAGATAGCATGGCAAAGCTAAGAGAAAGG  
TTAAACCAGAGACAAAAATTGTTTGAATCAGGACAAGGGTGGTTTGGAGGACTGTTTAAACAGGTCCCATGTTTACGAC  
CTTGGTATCCACCATTATGGGGCCCCCTTGATAATACTCTTATTAATCCTACTCTTCGGACCCTGTATTCTCAACCGCTTGG  
TCCAGTTTGTAAAAGACAGAATTTCCGTGGTGCAGGCCCTGGTTCTGACCCAACAGTATCACCAACTCAAATCAATAGGT  
CCAGAAGAAGTAGAATCACGTAAATAAAAGATTTTATTAGTTTCCAGAAAGAGGGGGGAATGAAAGACCCACCATAAG  
GCTTAGCAAGCTAGCTGCAGTAACGCCATTTTCGAAGGCATGAAAAAGTACCAGAGCTGGGTCTCAAAAGTTACAAGGA  
AGTTTCAAGTTATAGATTAACAGTTAAAGATCAAGGCTGAATAGCACTGGGACAGGGGCCGAACAGGATATCGGTGGTCAAG  
CACCTGGGCCCCGGCTCAGGGCCAAGAACAGATGGTTCTCAGATAAAGCGGAACAGCAACAGACACAGAAGCCCCGATA  
GACGTCAAGTGTTCGAGAACTAGCTTCACTGATTTAAAAAATAGAGGTGCACAATGCTCTGGTCACTCTTAAACCTGT  
GTGTCTGCCAATGTTCTGACCAGATATGTGCCCATTTGCTGAACCTTCATTAGACTCTTTCCTTGTACCCCTCCCTACCC  
ATTTCTTGAAAATAGACATTGTTTATAGATCTAAAAAGTCCACCTCAGTTTCCCAAAATGACCGGGAAGTACCCCAACCT  
TATTCGAACCTAACCAACCAGCTCGCTTCTCGCTTCTGTAACCACGCTTTTTGCTCCCCAGCCCTAGCCCTATAAAAAGGG  
TAAAAACTCCACACTCGGCGCGCCAGTCCTCCGATAGACTGAGTCGCGCGGGTACCCGTGTTCCCAATAAAGCCTCTTGC  
TGTTTACATCCGAATCGTGGACTCGCTGATCCTTGGGAGGGTCTCCTCAGATTGATTGACTGCCCACCTGGGGGGTCTTT  
CA

>Mpmv9

TGAAAGACCCACCATAAGGCTTAGCAAGCTAGCTGTAGTAACGCCATTTTGAAGGCATGAAAAAGTACCCGAGCTGGG  
TTCTCAAAAGTTACAAGGAAGTTCAAGTTATAGATTAACAGTTAAAGATCAAGGCTGAATAGCACTGGGACAGGGGCCGAA  
CAGGATATCGGTGATCAAGCACCTGGGCCCCGGCTCAGGGCCAAGAACAGATGGTTCTCAGATAAAGCGGAACAGCAAC  
AGACACAGAAGCCCCGATAGACGTCAAGTGTAGCAGAACTAGCTTCACTGATTTAGAAAAATAGAGGTGCACAGTGCTCT  
GGTCACTCCTTGAACCTGTGTGTCTGCCAATGTTCTGACCAGATATGTGCCCATTTGCTGAACCTTCATTAGACTCTTTCC

TTGTACCCCTCCCCTACCCATTTCTTGAAAATAGACATTGTTTTAGATCTAAAAAGTCCCACCTCAGTTTTCCCCAAATGAC  
CGGGAAGTACCCCAAACCTTATTGAACTAACCAACCAGCTCGCTTCTCGCTTCTGTAACCGCGCTTTTTGCTCCCCAGC  
CCTAGCCCTATAAAAAGGGTAAAACTCCACACTCGGCGCGCCAGTCCCTCCGATAGACTGAGTCGCCCCGGGTACCCGTGT  
TCCCAATAAAGCCTCTTGCTGTTTACATCCGAATCGTGGACTCGCTGATCCTTGGGAGGGTCTCCTCAGATTGATTGACT  
GCCCACCTGGGGGGGTCTTTCATTTGGAGGTTCCACCGAGATCAGGAGACCCCTGCCAGGGACCACCGACCCCGCCGG  
GAGGTAAGCTGGCCAGCGGTGCTTTCGTGTCTGTCTCTGTCTCCGTGCGTGTGTTGTGCCGGCATCTAATGTTTGCGCCTG  
CGTCTGTACTAGTTGGCTAACTAGATCTGTATCTGGCGGTTCCGCGGAAGAACTGACGAGTTCGTATTCCCGGCCGCGAGC  
CCCTGGGAGACGTCCCAGCGGCCCTCGGGGGCCCGTTTTGTGGCCCATCTGTATCAGTTAACCTACCCGAGTCGGACTTT  
TTGGAGCTCCGCCACTGTACGTGGCTTTGTTGGGGGACGAGAGACAGAGACACTTCCCGCCCCGTCTGGATTTTTTGCTT  
TCGGTTTTTACGCCGAAACCGCGCTGCGCTGATTTGTTTTATTGCTCTTTTGTCTTCTCGTTAGTTTTTTCTGTCTTTA  
AGTGTTTTCAAGATCATGGGACAGACCGTAACCTACCCCTCTGAGTCTAACCTTGACGACTGGGGAGATGTCCAGCGCAT  
TGCATCCAACCACTGTGTGGATGTCAGGAAGAGGCGCTGGATTACCTTCTGTTCCGCCGAATGGCCAACCTTCAATGTGG  
GATGGCCTCAGGATGGTACTTTCAATTTAAGTATTATCTCTCAGGTAAAGTCTAGAGTGTTTTGTCTGGTCCCCACGGA  
CACCCGGATCAGGTCCCATATATCGTTACCTGGGAGGCATTGCCTATGACCCCCCTCCGTGGGTCAAACCGTTTTGTTTC  
TCCTAAACCTCCTCCCTTGCCGACAGCTCCCGTCTCCCGCCCGGTCTTCTGCGCAACCTCCGTCCCGATCTGCCCTTT  
ACCCTGCCCTTACCCCTCTATAAAGTCCAAACCTCCTAAGCCCCAGGTTCTCCCTGATAGCGGCGGACCTCTCATTGAC  
CTTCTCACAGAGGACCCCGCCGTACGGAGCACAACCTTCTCTCTGCCAGAGAGAACGATGAAGAAGAGGCGGCCAC  
CACCTCCGAGGTTTTCCCCCTTCTCCCATGGCGTCTCGACTGCGGGGAAGGAGAGACCTCCCGCAGCGGACTCCACCT  
CCTCCCAGGCATTCCCACTCCGTATGGGGGGAGATGGCCAGCTTCAGTACTGGCCGTTTTCTCTCTGACTTATATAAT  
TGGAATAATAAACCTTCTTTTTCTGAAGATCCAGGTAAATTGACGGCCTTGATTGAGTCCGTCTCATCCCCACCA  
GCCCACCTGGGACGACTGTGAGCAGTTGTTGGGGACCTGCTGACCGGAGAAGAAAAGCAGCGGGTGCTCCTAGAGGCTA  
GAAAGGCAGTCCGGGGCAATGATGGACGCCCCACTCAGTTGCCTAATGAAATCAATGCTGCCTTTCCCTTGAGCGCCCT  
GATTGGGATTACACCACTACAGAAGGTAGGAACCACCTAGTCTCTATCGCCAGTTGCTCTTAGCGGGTCTCCAAAACGC  
GGGCAGAAGCCCCACCAATTTGGCCAAGGTAAAAGGGATAACCCAGGGACCTAATGAGTCTCCCTCAGCCTTTTTAGAGA  
GACTCAAGGAGGCCTATCGCAGGTACACTCCTTATGACCCTGAGGACCCAGGGCAAGAAACCAATGTGTCTATGTCATT  
ATCTGGCAGTCTGCCCCGGATATCGGGCGAAAGTTAGAGCGGTTAGAAGATTTAAAGAGCAAGACCTTAGGAGACTTAGT  
GAGGGAAGCTGAAAAGATCTTTAATAAACGAGAAACCCGGAAGAAAGAGGAACGTATCAGGAGAGAAACAGAGGAAA  
AAGAAGAACGCCGTAGGGCAGAGGATGAGCAGAAAGAGAAAGGAGACCGCAGAGAAGATAGAGAGATGAGCAAGCTC  
TTGGCCACTGTAGTTATTGGTCAGAGACAGGATAGACAGGGGGGAGAGCGGAAGAGGCCCCAAGTTGATAAGGATCAATG  
CGCCTACTGCAAGAAAAGGGACACTGGGCTAAAGACTGCCCAAAGAAGCCACGAGGGCCCCGAGGACCGAGGCCCCAGA  
CCTCCCTCCTGACCTTAGGTGACTAGGGAGGTGAGGGTACAGGAGCCCCCCCCCTGAACCCAGGATAACCTCAAAGTCGGG  
GGGCAACCCGTACCTTCTGGTGGATACTGGGGCCCAACACTCCGTGCTGACCCAAAATCCTGGACCCCTAAGTGACAA  
GTCTGCCTGGGTCCAAGGGGCTACTGGAGGAAAGCGGTATCGCTGGACCACGGATCGCAAAGTGCATCTAGCTACCGGTA  
AGGTACCCACTCTTTCCTCCATGTACCAGACTGCCCCCTATCTCTGCTAGGAAGAGATTTGCTGACTAACTAAAAGCC  
CAAATCCACTTTGAGGGATCAGGAGCTCAGGTTGTGGGACCAATGGGACAGCCCCCTGCAAGTGCTGACCCTAAACATAGA  
AGATGAGTATCGGCTACATGAGACCTCAAAGAGCCGGATGTTTCTCTAGGGTCCACATGGCTTTCTGATTTTCCCCAGG  
CCTGGGCGGAAACCGGGGCGATGGGACTGGCAGTTCCGAAGCTCCTCTGATCATACTCTGAAGGCAACCTCTACCCCC  
GTGTCCATAAAACAATACCCCATGTACAAGAAGCCAGACTGGGGATCAAGCCCCACATACAGAGACTGTTGGACCAGGG  
AATACTGGTACCCTGCCAGTCCCCCTGGAACACGCCCCCTGCTACCCGTTAAGAAACCAGGGACTAATGATTACAGGCCTG  
TCCAAGATCTGAGAGAAGTCAACAAGCGGGTGGAAGACATCCACCCACCCGTGCCCAACCTTACAACCTCTTGAGCGGG  
CTCCCACCGTCCCACCACTGGTACACTGTGCTTGACTTAAAGGATGCCTTTTTCTGCCTGAGACTCCACCCACCACTCA  
GCCTCTCTTCGCCTTTGAGTGGAGAGACCCAGAGATGGGAATCTCAGGACAATTAACCTGGACCAGACTCCCACAGGGTT  
TCAAAAACAGTCCCACCTGTTTGATGAGGCACTGCACAGAGACCTAGCAGGCTTCCGGATCCAGCACCCAGACTTGATC  
CTGCTACAGTACGTGGATGACTTACTGCTGGCCGCCACTTCTGAGCTCGACTGCCAACAAGGTACTCGGGCCCTGTTACA  
AACCCTAGGGGACCTCGGGTATCGGGCCTCGGCCAAGAAAGCCAAATTTGCCAGAAACAGGTCAAGTATCTGGGGTATC  
TTCTAAAGAGGGTCAGAGATGGCTGACTGAGGCCAGAAAGAGACTGTGATGGGGCAGCCTATTCCGAAGACCCCTCGA  
CAACTAAGGGAGTTCTTAGGGACGGCAGGCTTCTGTCGCCTCTGGATCCCTGGGTTTGAGAAATGGCAGCCCCCTTGTA  
TCCTCTCACAAAACGGGGACTCTGTTTAATTGGGGCCCAGACCAGCAAAAGGCCTATCAAGAAATCAAACAGGCTCTTC  
TAACTGCCCCAGCCCTGGGGTTGCCAGATTTGACTAAGCCCTTTGAACTCTTTGTGACGAGAGAAGCAGGGCTACGCCAAA  
GGCGTCTTAACGCAAAAACCTGGGACCTTGGCGTCGGCCGGTGGCCTACCTGTCCAAAAGCTAGACCCAGTGGCAGCTGG  
GTGGCCCCCTTGCTACGGATGGTAGCAGCCATTGCCGTTCTGACAAAGGATGCAGGCAAGCTAACTATGGGACAGCCGC  
TAGTCATTCTGGCCCCCATGCGGTAGAAGCACTGGTCAAACAACCCCTGACCGCTGGCTATCCAATGCTCGCATGACC  
CACTATCAGGCAATGCTCCTAGATACGGACCGAGTTTCACTTCGGACCGGTGGTAGCCTTAAACCCGGCCACGTTGCTCCC  
CTTGCCGGGAAAAGAGACCCCCCAGACTGCCTCGAGATCTTGCTGAGACACACGGCACAGACCGGACCTCACGGACC  
AGCCCCCTCCCAATGCCGACCACACCTGGTATACAGATGGAAGCAGCTTCTGTCAGGAGGGGCAACGTAAGGCTGGAGCA  
GCGGTGACCACCGAGACCGAGGTAATCTGGGCCAAGGCGTTGCCAGCCGGGACATCCGCCCAGCGAGCTGAACCTAATAGC  
ACTCACCCAGGCCCTAAAGATGGCAGAAGGTAAGAAGCTAAATGTTTATACTGATAGCCGCTATGCCTTTGCTACCGCCC

ATGTCCATGGAGAAATATATAGGAGACGTGGGTTGCTCACCTCAGAAGGCAAGGAGATCAAGAACAAGGGCGAAATCTTG  
GCCTTACTGAAAGCTCTCTTTCTGCCCCAAAGACTCAGTATAATTCACTGCCCAGGACATCAGAAAGGCAATAGTGCTGA  
AGCTAAAGGCAACCGAATGGCGGACCAGGCAGCCCCGGAAGCAGCCATGGGGACTGACACAAAGGCCTCCTCACTTCTCA  
TAGAGACCTCAACCCCGTACACTCCAGACTTCTTCCATTATACTGAAACAGATATAAAGAACCTACGAGAGTTGGGAGCC  
ACATATGATAGAGAGAAAAAATATTGGGTCTTGCAAGGTAAACCTGTGATGCCTGACCAGTTCACCTTTGAATTATTAGA  
CTTCTTACCAGCTCACCCACCTTAGCTATCAGAAGATGAGGGCACTTCTAGACAGAAAAGAAAGCCCCCTATTACATGC  
TAAATAAAGATAAGATCCTCCACGAGGTGGCGGAATCATGCCAAGCCTGTGTCCAAGTAAATGCCAGTAAAGCTAAGGTC  
GGTCCCGGGGTGCGAGTAAGAGGACATCGACCAGGCACCCATTGGGAAATTGACTTTACTGAAGTAAGGCCCGGACTGTA  
TGGGCATAAGTATCTTCTGGTGTGTTGTGGACACGTTCTCTGGCTGGGTGGAAGCCTTCCCAACCAAGCATGAGACTGCCA  
AAGTTGTGACCAAAAAAGCTTCTAGAAGAAATATTTCCAAGGTTTGAATGCCCAAGTATTGGGGACTGATAATGGGCCT  
GCCTTCGTCTCCAGGTAAGTCAGTCGGTGGCCAAGCTACTGGGGATTGATTGGAAACTACATTGTGCTTACAGACCCCA  
GAGTTCAGGTGAGGTAAAAAGAATGAATAGGACAATCAAGGAGACTTTGACCAAATTAACGCTTGCAACTGGCACTAGAG  
ACTGGGTACTCCTACTTCCCTTGGCCCTCTACCGAGCCCCGCAACACTCCGGGCCCCCATGGACTCACTCCGTATGAAATC  
CTGTATGGGGCGCCCCCGCCCCCTTGTTAATTTCCATGATCCTGAAATGTCAAAGTTTACTAATAGCCCCCTCTCTCCAAGC  
TCACTTACAGGCCCTCCAAGCGGTACAACGAGAGGTCTGGAAGCCTCTGGCCGCTGCCTATCAGGACCAACAAGACCAGC  
CTGTGATACCACACCCCTTCCGTGTGCGCGACACCGTGTGGGTACGCCGGCACCAGACTAAGAACTTGGAACCTCGCTGG  
AAAGGACCCTACACCGTCTGTGCTGACCACCCCCACCGCTCTCAAAGTAGACGGCATCGCTGCGTGGATCCACGCCGCTCA  
CGTAAAGCGGCGACAACCCCTCCGGCCGGAACAGCATCAGGACCAGCATGGAAGGTCCAGCGTTCTCAAACCCCTTTAA  
AGATAAGATTAACCCGTGGGCCCCCCTGATAGTCCTGGGGATCTTAATAAGGGCAGGAGTATCAGTACCACATGACAGCC  
CTCATCAGGTCTTCAATGTTACTTGGAGAGTTACCAACTTAATGACAGGACAAACAGCTAATGCTACCTCCCTCCTGGGG  
ACAATGACCGATGCCTTTCCCAAACCTGTACTTTGACTTGTGCGACTTAATAGGGGACGACTGGGATGAGACTGGACTCGG  
GTGTGCGACTCCCGGGGGAAGAAAAAGGGCAAGAACATTTGACTTCTATGTTTGCCCCGGGCATACTGTACCAACAGGGT  
GTGGAGGCCCGAGAGAGGGCTACTGTGGCAAATGGGGCTGTGAGACCCTGGACAGGCATACTGGAAGCCATCATCATCA  
TGGGACCTAATTTCCCTTAAGCGAGGAAACACCCCTCGGAATCAGGGCCCCCTGTTATGATTCTCAGCGGTCTCCAGTGG  
CATCCAGGGTGCCACACCGGGGGGTGATGCAATCCCCTAGTCCTAGAATTCACTGACGCGGGTAAAAAGGCCAGCTGGG  
ATGGCCCCAAAGTATGGGGACTAAGACTGTACCGATCCACAGGAACCGACCCGGTGACCCGGTTCTCTTTGACCCGCCAG  
GTCCTCAATATAGGGCCCCGATCCCCATTGGGCTTAATCCCGTACTCATGACAGTTACCCCCCTCCCGACCCGCTGCA  
GATCATGCTCCCCAGGCCTCCTCAGCCTTCCCTACAGGCGCAGCCTCTATACAACCTGGGACGGGAGACAGACTGCTGA  
ACCTGGTAGATGGAGCCTACCAAGCACTCAACCTCACCAGTCTGACAAAACCCAAGAGTGCTGGTTGTGTCTGGTATCG  
GGACCCCCCTATTACGAAGGGGTTGCCGTCTAGGTACCTACTCCAACCATACCTCTGCCCCAGCTAAGTCTCCGTGGC  
CTCCCAACACAAGCTGACCCTGTCCAAAGTAACCGACAGGGACTCTGCGTAGGAGCAGTTCCCAAAACCCATCAGGCC  
TGTGTAATACCACCCAGAATACAAGCGACGGGTCTACTATCTGGCTGCTCCCGCCGGGACCATTGTTGGGCTTGCAACACC  
GGGCTCACTCCCTGCCTATCTACTACTGTACTCAACCTCACCACCGATTACTGTGTCTGGTTGAGCTCTGGCCAAAGGT  
GACCTACCACTCCCCTGGTTATGTTTATGGCCAGTTTGTAGAGAAAAACCAATATAAAGAGAGCCGGTGTCTTAATCTC  
TGGCCCTGCTGTTGGGAGGACTTACTATGGGCGGCATAGCTGCAGGAGTAAGAACAGGGACTACAGCCCTAGTGGCCACC  
AAGCAATTCGAGCAGCTCCAGGCAGCCATACATACAGACCTTGGGGCCTTAGAAAAATCAGTCAGTGCCTTAGAAAAGTC  
TCTGACCTCGTTGTCTGAGGTGGTCCTACAGAACCGGAGAGGATTAGATCTACTGTTCTTAAAGAAGGAGGATTATGTG  
CTGCCCTAAAAGAAGAATGCTGTTTCTACGCGGACCACACTGGCGTAGTGAGAGATAGCATGGCAAAGCTAAGAGAAAGG  
TTAAACCAGAGACAAAAATTGTTTGAATCAGGACAAGGGTGGTTTGTAGGGACTGTTTAAACAGGTCCCCATGGTTACAGAC  
CTTGATATCCACCATTATGGGCCCCCTTGATAATACTCTTATTAATCCTACTCTTCGGACCCTGTATTCTCAACCGCTTGG  
TCCAGTTTGTAAAAGACAGAATTTCCGTGGTGCAGACCCTGGTTCTGACCCAACAGTATCATCAACTCAAATCAATAGGT  
CCAGAAGAAGTGGAATCACGTGAATAAAAGATTTTATTAGTTTCCAGAAAGAGGGGGGAATGAAAGACCCACCATAAG  
GCTTAGCAAGCTAGCTGTAGTAACGCCATTTTGCAAGGCATGAAAAAGTACCCGAGCTGGGTCTCAAAGTTACAAGGA  
AGTTTCAAGTTATAGATTAACAGTTAAAGATCAAGGCTGAATAGCACTGGGACAGGGGCCGAACAGGATATCGGTGATCAAG  
CACCTGGGCCCCGGCTCAGGGCCAAGAACAGATGGTTCTCAGATAAAGCGGAACAGCAACAGACACAGAAGCCCCGATA  
GAGCTCAGTGTTAGCAGAACTAGCTTCACTGATTTAGAAAAATAGAGGTGCACAGTGCTCTGGTCACTCCTTGAACCTGT  
GTGTCTGCCAATGTTCTGACCAGATATGTGCCCATTTGCTGAACCTTCATTAGACTCTTTCCTTGTACCCCTCCCCTACCC  
ATTTCTTGAAAATAGACATTGTTTAGATCTAAAAAGTCCACCTCAGTTTCCCCAAATGACCGGGAAGTACCCCAAACCT  
TATTCGAACCTAACCAACCAGCTCGCTTCTCGCTTCTGTAACCGCGCTTTTTGCTCCCCAGCCCTAGCCCTATAAAAAGGG  
TAAAAACTCCACACTCGGCGCGCCAGTCCTCCGATAGACTGAGTCGCCCGGGTACCCGTGTTCCCAATAAAGCCTCTTGC  
TGTTTACATCCGAATCGTGGACTCGCTGATCCTTGGGAGGGTCTCCTCAGATTGATTGACTGCCACCTGGGGGGGTCTT  
TCA

>Pmv1

TGAAAGACCCACCATCAGGCTTAGCAAGCTAGCTGCAGTAACGCCATTTTGAAGGCATGAAAAAGTACCAGAGCTGAG  
TTCTCAAAAGTTACAAGAAAGTTTCAAGTTAAAGATTAACAGTTAAAGATTAAGGCTGAATAATACTGGGACAGGGGCCAAA  
TATCGGTGGTCAAGCACCTGGGCCCCGGCTCAGGGCCAAGAACAGATGGCTCTCAGACGTGAGTGTAGCAGAACTAGCT  
TCACTGATTTAGAAAAATAGAGGTGCACAGTGCTCTGGCCACTCCTTGAACCTGTGTGTCTGCCAATGTTCTGACCAGGT

GTGTGCCCATTGTTGAACCTTCATTAGACCCTTTCTCGTACCCCTCCCATACCCATTTCTTGAAAATAGACATTGTTTGA  
GAACTAAAAAGTCCCACCTCAGTTTTCCCCAAATGACCGAGAAATACCCCAAGCCTTATTTCGAACTAACCAACCAGCTCGC  
TTCTCGCTTCTGTAAACGCGCTTTTTGCTCCCCAGCCCCAGCCCTATAAAAAGGGTAAAACTCCACACTCGGCGCGCCA  
GTCCTCCGATAGACTGCGTCGCCCCGGGTACCCGTGCTCCCAATAAAGCCTCTTGCTGTTTGCATCCGAATCGTGGTCTCG  
CTGGTCCTTGAGAGGGTCTCCTCAGATTGATTGACTACCCACGTGGGGGTCTTTCATTTGGAGGTCCCACCGAGATTTG  
GAGACCCCTGCCCAGGGACCACCGACCCCCCGCCGGGAGGTAAGCTGGCCAGCGGTGCTTTTCGTGTCTGTCTCTGTCTTC  
GTGCGTGTGTTGTGCCGGCATCCAATGTTTGGCCTGCGTCTGTACTAGTTAGCTAACTAGATCTGTATCTGGCGGTTCGG  
CGGAAGAACTGACGAGTTTCGTATTCCCGGCCGAGCCCCCTGGGAGACGTCCCAGCGGCCCTCGGGGGCCCGTTTTGTGGCC  
CATTCTGTATCAGTTAACCTACCCGAGTCGGACTTTTTGGAGCTCCGCCACTGTACGTGGCTTTGTTGGGGGACGAGAGA  
CAGAGACACTTCCCGCCCCCGTCTGAATTTTTGCTTTTCGTTTTACGCCGAAGCCGCGCGCTGTGATTTGTTTGT  
GTTCTTTTGTCTTTCGTTAGTTTTCTTCTGTCTTTAAGTGTTTTCGAGATCATGGGACAGACCGTAACCTACCCCTCTGAG  
TTTAACCTTGCAGCACTGGGGAGATGTCCAGCGCATTGCATCCAACCACTGTGGATGTCAAGAAGAGGCGCTGGATTA  
CCTTCTGTTCCGCTGAATGGCCAACTTTCAATGTGGGATGGCCTCAGGATGGTACTTTCAATTTAAGTATTATCTCTCAG  
GTTAAGTCTAGAGTGTTTTGTCTGGTCCCCACGGACACCCGGATCAGGTCCCATATATCGTCACCTGGGAGGCATTGTC  
CTATGACCCCCCTCCGTGGGTCAAACCGTTTTGTGTCTCCTAAACTTCCTCCCTTGCCGACAGCTCCCGTCTCCCGCCCCG  
GTCCTTCTGCGCAACCTCCGTCCCGATCTGCCCTTTACCCTGCCCTTACCCCTCTATAAAGTCCAAACCTCCTAAGCCC  
CAGGTTCTCCCTGATAGCGGCGGACCCCTCATTGACCTTCTCACAGAGGACCCCCCGCCGTACAGAGCACAACCCCTCCTC  
CTCTGCCAGGGAGAACGACGAAGAAGAGGCGGCCACCACCTCCGAGGTTTTCCCCCTTCTCCCATGGTGTCTCGACTGC  
GGGGAAGGAGAGACCCCTCCCGCAGTGGACTCCACCACCTCCAGGCATTTCCACTCCGCATGGGGGGAGATGGCCAGCTT  
CAGTATTGGCCGTTTTCTCTTCGATTTATACAATTGAAAAATAATAACCTTCCTTTTTCTGAAGATCCAGGTAAATT  
GACGGCCTTGATTGAGTCCGTCTCATCACCCACCAGCCACCTGGGACGACTGTCAGCAGTTGTTGGGGACCCCTGCTGA  
CCGGAGAAGAAAAGCAGCGGGTGCTCCTAGAGGCTAGAAAGGCAGTCCGGGGCAATGATGGACGCCCCACTCAGTTGCCT  
AATGAAGTCAATGCTGCTTTTCCCTTGAACGCCCCGGTTGGGATTACCCACTACAGAAGGTAGGAACCACCTAGTCCT  
CTATCGCCAGTTGCTCTTAGCGGGTCTCCAGAACGCGGGCAGAAGTCCCACCAATTTGGCCAAGGTAAAAGGGATAACCC  
AGGGACCTAATGAGTCTCCCTCAGCCTTTTTAGAGAGACTCAAAGAGGCCTATCGCAGGTACACTCCTTATGACCCTGAG  
GACCCAGGGCAAGAAACCAATGTGTCTATGTCAATCATCTGGCAGTCTGCCCGGATATCGGGCGAAAGTTAGAGCGGTT  
AGAAGATTTAAAGACCAAGACCTTAGGAGACTTAGTGAGGGAAGCTGAAAAGATCTTTAATAAGCGAGAAACCCCGAAG  
AAAGAGAGGAACGTATCAAGAGAGAAACAGAGGAAAAAGAACGCCGTAGGGCAGAGGATGACGAGAGAGAGAAAGAA  
AGGGACCGCAGAAGACATAGAGAGATGAGCAAGCTCTTGCCACTGTAGTTATTGGTCAGAGACAGGATAGACAGGGGGG  
AGAGCGGAGGAGGCCCAACTTGATAAGGACCAATGCGCCTACTGCAAAGAAAAGGGACACTGGGCTAAGGACTGCCCAA  
AGAAGCCACGAGGGCCCCGAGGACTGAGGCCCCAGACCTCCCTCCTAACCTTAGGTGACTAGGGAGGTGAGGGTACAGGAG  
CCCCCCCCCTGAACCCAGGATAACCTCAAAGTCGGGGGGCAACCCGTACCTTCTTGGTAGATACTGGGGCCCCAACACTC  
CGTGCTGACCCAAAATCCTGGACCCCTAAGTGACAAGGCTGCCTGGGTCCAAGGGGCTACTGGAGGAAAGCGGTATCGCT  
GGACCACGGATCGCAAAGTACATCTAGCTACCGGTAAGGTACCCACTCTTTCTCCATGTACCAGACTGCCCCCTATCCT  
CTGCTAGGAAGAGACTTGCTGACTAACTAAAAGCCCAAATCCACTTCGAGGGATCAGGAGCTCAGGTTATGGGACCAAT  
GGGACTGCCCCTGCAAGTGCTGACCCTAAACATAGAAGATGAGTATCGGCTACATGAGACCTCAAAGAGCCGGATGTTT  
CTCTAGGGTCCACCTGGCTTTCTGATTTTTCCCAGGTCTGGGCGGAAACCGGGGGCATGGGACTGGCAGTTCCGCAAGCT  
CCTCTGATCATACCTCTGAAGGCAACCTCTACCCCCGTGTCCATAAAACAATACCCCATGTCAAGAAGCCAGACTGGG  
GATCAAGCCCCACATACAGAGACTGTTGGACCAGGGAATACTGGTACCCTGCCAGTCCCCCTGGAACACGCCCCCTGCTAC  
CCGTTAAGAAACCAGGGACTAATGATTATAGGCCTGTCCAGGATCTGAGAGAAGTCAACAAGCGGGTGGAAGACATCCAC  
CCCACCGTGCCCAACCTTACAACCTCTTGAGCGGGCTCCCACCGTCCCACCAGTGGTACACTGTGCTTGATTTAAAGGA  
TGCCTTTTTCTGCCTGAGACTCCACCCACCAGTCAGCCTCTCTTCGCCTTTGAGTGGAGAGATCCAGAGATGGGAATCT  
CAGGACAATTGACCTGGACCAGACTCCCACAGGGTTTTCAAAAACAGTCCCACCCTGTTTGATGAGGCACTGCACAGAGAC  
CTAGCAGACTTCCGGATCCAGCACCCAGACTTGATCCTGCTACAGTACGTGGATGACTTACTGCTGGCCGCCACTTCTGA  
GCTCGACTGCCAAACAGGTACTCGGGCCCTGTTACAAACCTTAGGGGACCTCGGGTATCGGGCCTCGGCCAAGAAAGCCC  
AAATTTGCCAGAAACAGGTCAAGTATCTGGGTATCTTCTAAAAGAGGGTCAGAGATGGCTGACTGAGGCCAGAAAGAG  
ACTGTGATGGGGCAGCCTACTCCGAAGACCCCTCGACAACCTAAGGGAGTTCTAGGGACGGCAGGCTTCTGTGCGCTCTG  
GATCCCTGGGTTTTGCAGAAATGGCAGCCCCCTTGTAACCTCTCACAAAACGGGGACTCTGTTTAATTGGGGCCCAGACC  
AGCAAAAGGCCTATCAAGAAATCAAACAGGCTCTTCTAACTGCCCCAGCCCTGGGATTGCCAGATTTGACTAAGCCCTTT  
GAACTCTTTGTTGACGAGAAGCAGGGCTACGCCAAAGGCGTCTTAACGCAAAAACCTGGGACCTTGGCGTCGGCCGGTGGC  
CTACCTGTCCAAAAGCTAGACCCAGTGGCAGCTGGGTGGCCCCCTTGCTACGGATGGTAGCAGCCATTGCCGTTCTGA  
CAAAAGATGCAGGCAAGCTAACCATGGGACAGCCGCTAGTCATCTGGCCCCCATGCAGTAGAGGCACTAGTCAAGCAA  
CCCCCTGACCGCTGGCTATCCAACGCCCCGATGACCCACTATCAGGCGATGCTCCTAGATACGGACCGGGTCCAGTTCCG  
ACCGGTGGTAGCCCTAAACCCGGCTACGTTGCTCCCCCTACCGGGGAAAGAGCCTCACCATGACTGCCTCGAGATCTTGG  
CCGAGACACACGGAACCAGACCAGACCTCACGGACCAGCCCCCTCCAGACGCCGACCACACCTGGTATACAGATGGAAGC  
AGCTTCCTGCAAGAGGGACAACGTAGGGCTGGAGCAGCGGTGACCACCGAGACCGAGGTAATCTGGGCCAAGGCGTTGCC  
AGCCGGGACATCCGCCAGCGAGCTGAACTAATAGCACTCACCCAGGCCCTAAAGATGGCAGAAGGTAAGAAGCTAAATG

TTTATACTGATAGCCGCTATGCCTTTGCTACCGCCCATATCCATGGAGAAATATATAGGAGACGTGGGTTGCTCACCTCA  
GAAGGCAAGGAGATCAAGAACAAGGGCGAAATCTTGGCCTTACTGAAAGCTCTCTTTCTGCCCCAAAGACTCAGTATAAT  
TCACTGCCCAGGACATCAGAAAGGCAATAGTGCTGAAGCTAAAGGCAACCGAATGGCGGACCAGGCAGCCCCGGAAGCGG  
CCATGGGGACTGACACAAAGGCCTCCTCACTTCTCATAGAGACCTCAACCCCGTACACTCCAGACTTCTTCCATTATACT  
GAGACAGATATAAAGAACCTACAAGAGTTGGGAGCCACATATGATAGAGAGAAAAAATATTGGGTCTTGCAAGGTAAACC  
TGTGATGCCTGACCAGTTCACCTTTGAATTATTAGACTTCCTTACCAGCTCACCCACCTTAGCTATCAGAAGATGAGGG  
CACTTCTAGACAGGAAAGAAAGCCCCCTATTACATGCTAAATAAAGATAAGATCCTCCACGAGGTGGCGGAATCATGCCAA  
GCCTGTGTCCAAGTAAATGCCAGTAAGACTAAGATCAGGGCCGGAACACGAGTAAGAGGACATCGACCAGGCACCCATTG  
GGAAATTGACTTTTACTGAAGTGAAGCCCGGACTGTATGGGTACAAGTATCTCTGGTATTTCGTGGACACGTTCTCTGGCT  
GGGTTGAAGCCTTCCCAACCAACATGAGACTGCCAAATAGTGACCAAGAAACTTCTGGAAGAAATATTTCCAAGGTTT  
GGAATGCCCCAAGTGTTGGGGACTGATAATGGGCCTGCCTTCGTCTCCAGGTAAAGTCAAGTGGTGGCCAAAGCTACTGGG  
GATTGATTGGAAACTACATTGTGCTTACAGACCCAGAGTTCAGGTCAAGGTAGAAAGAATGAATAGGACAATCAAGGAGA  
CTTTGACCAAAATTAACGCTTGCAACTGGCACTAGAGACTGGGTACTCCTACTTCCCTTAGCCCTCTACCGAGCCCCGCAAC  
ACTCCGGGCCCCCATGGACTCACTCCGTATGAAATCCTGTATGGGGCGCCCCCGCCCCCTTGTTAATTTCCATGATCCTGA  
AATGTCAAAGTTTACTAATAGCCCCCTCTCTCCAAGCTCACTTACAGGCCCTCCAAGCAGTACAACGAGAGGTCTGGAAGC  
CACTGGCCGCTGCCTATCAGGACTAGCTGGACCAGCCAGTGATACCACACCCCTTCCGTGTGCGGACACCGTGTGGGT  
CGCCGGCACCAGACTAAGAACTTGGAACCTCGCTGGAAAGGACCCTACACCGTCTGTGCTGACCACCCCCACCGCTCTCAA  
AGTAGACGGCATCGCTGCGTGGATCCACGCCGCTCACGTAAAAGCGGCGACAACCCCTCCGGCCGGAACAGCATCAGGAC  
CGACATGGAAGGTCCAGCGTTCTCAAACCCCTTAAAGATAAGATTAACCCGTGGGGCCCCCTAATAATCCTGGGGATCT  
TAATAAGAGCAGGAGTATCAGTACAACATGACAGCCCTCATCAGGTCTTCAATGTTACTTGGAGAGTTACCAACTTAATG  
ACAGGACAAACAGCTAATGCTACCTCCCTCCTGGGGACAATGACCGATGCCTTTCCTAAACTGTACTTTGACTTGTGCGA  
TTTAATAGGGGACGACTGGGATGAGACTGGACTCGGGTGTGCGACTCCCGGGGGAAGAAAAAGGGCAAGAACATTTGACT  
TCTATGTTTGGCCCCGGGCATACTGTACCAACAGGGTGTGGAGGGCCGAGAGAGGGCTACTGTGGCAAATGGGGCTGTGAG  
ACCACTGGACAGGCATACTGGAAGCCATCATCATCATGGGACCTAATTTCCCTTAAGCGAGGAAACACCCCTCGGAATCA  
GGGCCCCCTGTTATGATTCTCAGCGGTCTCCAGTGACATCAAGGGCGCCACACCGGGGGGTGATGCAATCCCCTAGTCC  
TGGAATTCAGTGACGCGGGCAAAAAGGCCAGCTGGGATGGCCCCAAAGTATGGGGACTAAGACTGTACCGATCCACAGGG  
ACCGACCCGGTGACCCGGTTCTCTTTGACCCGCGAGTCTCAATATAGGGCCCCGCGTCCCCATTTGGGCCCTAATCCCGT  
GATCACTGACCAAGTTACCCCCCTCCCCGACCCGTGAGATCATGCTCCCCAGGCCTCCTCAGCCTCCTCTCCAGGCAG  
CCTCTATAGTCCCTGAGACTGCCACCTTCTCAACAACCTGGGACGGGAGACAGGCTGTAAACCTGGTAGATGGAGCC  
TACCAAGCTCTCAACCTCACCAGTCCTGACAAAACCAAGAGTGCTGGTTGTGTCTGGTAGCGGGACCCCCCTACTACGA  
AGGGGTTGCGCTCCTAGGTACTTATTCCAACCATACTCTGCCCCAGCTAACTGCTCCGTGGCCTCCCAACACAAGCTGA  
CCCTGTCCGAAGTGACCGGACAGGGACTCTGCGTAGGAGCAGTTCCCAAAACCCATCAGGCCCTGTGTAATACCACCCAG  
AAGACGAGCGACGGGTCTACTATCTGGCTGCTCCCGCCGGGACCATTTGGGCTTGCAACACCGGGCTCACTCCCTGCCT  
ATCTACCACTGTACTCGACCTCACCACCGATTACTGTGTCTCTGGTTGAGCTCTGGCCAAAGGTGACCTACCACTCCCCTG  
GTTATGTTTATGGCCAGTTTGAAGAAAAAACCAATATAAAAGAGAGCCGGTGTCTAATACTCTGGCCCTGCTGTTGGGA  
GGACTTACTATGGGCGGCATAGCTGCAGGAGTAGGAACCGGGACTACAGCCCTAGTGGCCACCAACAATTCGAGCAGCT  
CCAGGCAGCCATACATACAGACCTTGGGGCTTTAGAAAAGTCAGTCAGTGCCCTAGAAAAGTCTCTGACCTCGTTGTCTG  
AGGTGGTCTACAGAACCGGAGGGGATTAGATCTACTGTTCTTAAAGAAGGAGGATTATGTGCTGCCCTAAAAGAAGAA  
TGCTGTTTCTACGCGGACCACACTGGCGTAGTAAGAGATAGCATGGCAAAGCTAAGAGAAAGGTTGAACCAGAGACAAAA  
ATTGTTTGAATCAGGACAAGGGTGGTTTGAAGGACTGTTTAAACAGGTCCCCATGGTTACGACCTTAATATCTACCATTA  
TGGGCCCCCTTGATAATACTTTTATTAATCCTACTCTTCGGACCCCTGTATTCTCAACCGCTTGGTCCAGTTTGTAAAAGAC  
AGAATTTGCGTAGTGACGGCCCTGGTTTGAACCAACAGTATACCAACTCAAATCAATAGATCCAGAAGAAGTGAATC  
ACGTGAATAAAAGATTTTATTAGTTTCCAGAAAGAGGGGGGAATGAAAGACCCACCATCAGGCTTAGCAAGCTAGCTG  
CAGTAACGCCATTTTGCAAGGCATGAAAAAGTACCAGAGCTGAGTTCTCAAAAGTTACAAGAAAGTTGAGTTAAAGATTA  
ACAGTTAAAGATTAAGGCTGAATAATACTGGGACAGGGGCCAAATATCGGTGGTCAAGCACCTGGGCCCCGGCTCAGGGC  
CAAGAACAGATGGCTCTCAGACGTGAGTTAGCAGAACTAGCTTCACTGATTTAGAAAAATAGAGGTGCACAGTGCTCT  
GGCCACTCCTTGAACCTGTGTGTCTGCCAATGTTCTGACCAGGTGTGTGCCATTGTTGAACCTTCATTAGACCCCTTCC  
TCGTACCCCTCCCATACCCATTTCTTGAAAATAGACATTGTTTGAAGTAAAAAGTCCCACCTCAGTTTCCCCAAATGAC  
CGAGAAATACCCCAAGCCTTATTGAACTAACCAACCAGCTCGCTTCTCGCTTCTGTAACCGCGCTTTTTGCTCCCCAGC  
CCCAGCCCTATAAAAAGGGTAAAACTCCACACTCGGCGCGCCAGTCTCCTCCGATAGACTGCGTGCAGGCGGTACCCGTGC  
TCCCAATAAAGCCTCTTGCTGTTTGCATCCGAATCGTGGTCTCGCTGGTCTTGAGAGGGTCTCCTCAGATTGATTGACT  
ACCCACGTGCGGGGTCTTTCA

>Pmv10

TGAAAGACCCACCATCAGGCTTAGCAAGCTAGCTGCAGTAACGCCATTTTGAAGGCATGAAAAAGTACCAGAGCTAAG  
TTCTCAAAAGTTACAAGAAAGTTGAGTTAAAGATTAACAGTTAAAGATTAAGGCTGAATAATACTGGGACAGGGGCCAAA  
TATCGGTGGTCAAGCACCTGGGCCCCGGCTCAGGGCCAAGAACAGATGGCTCTCAGACGTGAGTTAGCAGAACTAGCT  
TCACTGATTTAGAAAAATAGAGGTGCACAGTGCTCTGGCCACTCCTTGAACCTGTGTGTCTGCCAATGTTCTGACCAGGT

GTGTGCCCATTGTTGAACCTTCATTAGACCCTCTCCTCGTACCCCTCCCATACCCATTTCTTGAAAATAGACATTGTTTAA  
GAACTAAAAAGTCCCACCTCAGTTTTCCCCAAATGACCGAGAAATACCCCAAGCCTTATTTCGAACTAACCAACCAGCTCGC  
TTCTCGCTTCTGTAAACGCGCTTTTTGCTCCCCAGCCCCAGCCCTATAAAAAGGGTAAAACTCCACACTCGGCGCGCCA  
GTCTCCGATAGACTGCGTCGCCCCGGGTACCCGTGTTCTCAATAAAGCCTCTTGCTGTTTGCATCCGAATCGTGGTCTCG  
CTGGTCCTTGAGAGGGTCTCCTCAGATTGATTGACTACCCACGTGGGGGTCTTTCATTTGGAGGTTCCACCGAGATTTG  
GAGACCCCTGCCCAGGGACCACCGACCCCCCGCCGGGAGGTAAGCTGGCCAGCGGTGCTTTTCGTGTCTGTCTCTGTCTTC  
GTGCGTGTGTTGTGCCGGCATCCAATGTTTGGCCTGCGTCTGTACTAGTTAGCTAACTAGATCTGTATCTGGCGGGTCCG  
CGGAAGAACTGACGAGTTTCGTATTCCCGGCCGAGCCCCCTGGGAGACGTCCCAGCGGCCTCGGGGGCCCGTTTTGTGGCC  
CATTCTGTATCAGTTAACCTACCCGAGTCGGACTTTTTGGAGCTCCGCCACTGTACGTGGCTTTGTTGGGGGACGAGAGA  
CAGAGACACTTCCCGCCCCCGTCTGAATTTTTGCTTTTCGTTTTACGCCGAAGCCGCGCGCTGTGATTTGTTTGT  
GTTCTTTTGTCTTTCGTGAGTTTTCTTCTGTCTTTAAGTGTTTTCGAGATCATGGGACAGACCGTAACCTACCCCTCTGAG  
TTTAACCTTGACGACTGGGGGGATGTCCAGCGCATTGCATCCAACAGTCTGTGGATGTCAGGAAGAGGCGCTGGATTA  
CCTTCTGTTCCGCTGAATGGCCAACCTTTCAATGTGGGATGGCCTCAGGATGGTACTTTCAATTTAAGTATTATCTCTCAG  
GTTAAGTCTAGAGTGTTTTGTCTGGTCCCCACGGACACCCGGATCAGGTCCCATATATCGTCACCTGGGAGGCATTGTC  
CTATGACCCCCCTCCGTGGGTCAAACCGTTTTGTGTCTCCTAAACTTCCTCCCTTGCCGACAGCTCCCGTCTCCCGCCCCG  
GTCCTTCTGCGCAACCTCCGTCCCGATCTGCCCTTTACCCTGCCCTTACCCCTCTATAAAGTCCAAACCTCCTAAGCCC  
CAGGTTCTCCCTGATAGCGGCGGACCCCTCATTGACCTTCTCACAGAGGACCCCCCGCCGTACAGAGCACAAACCTCCT  
CCTCTGCCAGGGAGAACGACGAAGAAGAGGCGGCCACCACCTCCGAGGTTTTCCCCCTTCTCCCATGGTGTCTCGACTG  
CGGGGAAGGAGAGACCTCCCGCAGCGGACTCCACCACCTCCCAGGCATTCCCACTCCGCATGGGGGGAGATGGCCAGCT  
TCAGTACTGGCCGTTTTCTCCTCTGATTTAACCTTCTTTTTCTGAAGATCCAGGTAAATTGACGGCCTTGATTGAGTC  
CGTCTCATCACCCACCAGCCACCTGGGACGACTGTCAGCAGTTGTTGGGGACCCTGCTGACCGGAGAAGAAAAGCAGC  
GGGTGCTCCTAGAGGCTAGAAAGGCAGTCCGGGGCGATGATGGACGCCCCACTCAGTTGCCTAATGAAGTCAATGCTGCT  
TTTCCCTTGAACGCCCCGTTGGGATTACACCACTACAGAAGGTAGGAACCACCTAGTCCTCTATCGCCAGTTGCTCTT  
AGCGGGTCTCCAGAACGCGGCAGAAAGTCCCACCAATTTGGCCAAGGTAAAAGGGATAACCCAGGGACCTAATGAGTCTC  
CCTCAGCCTTTTTAGAGAGACTCAAAGAGGCCTATCGCAGGTACACTCCTTATGACCCTGAGGACCCAGGGCAAGAAAC  
AATGTGTCTATGTCAATCATCTGGCAGTCTGCCCCGATATCGGGCGAAAGTTAGAGCGGTTAGAAGATTTAAAGAGCAA  
GACCTTAGGAGACTTAGTGAGGAAGCTGAAAAGATCTTTAATAAGCGAGAAACCCGGAAGAAGAGAGAGCAACCTATCA  
AGAGAGAAACAGAGGAAAAAGAAGAACGCCGTAGGGCAGAGATGAGCAGAGAGAGAAAGAAAGGACCCGCAAGACAT  
AGAGAGATGAGCAAGCTCTTGCCACTGTGATTATTGGTACAGAGACAGGATAGACAGGGGGGAGAGCGGAGGAGGCCCA  
ACTTGATAAGGACCAATGCGCCTACTGCAAAGAAACGGGACACTGGGCTAAGGACTGCCCCCTGCCCTGGGATTGCCAGAT  
TTGACTAAGCCCTTTGAACTCTTTGTTGACGAGAAGCAGGGCTACGCCAAAGGCGTCTTAACGCAAAAACCTGGGACCTTG  
GCGTCGGCCGGTGGCCTACCTGTCCAAAAGCTAGACCCAGTGGCAGCTGGGTGGCCCCCTTGCTACGGATGGTAGCAG  
CCATTGCCGTTCTGACAAAAGATGCAGGCAAGCTAACCATGGGACAGCCGCTAGTCATCCTGGCCCCCATGCAGTAGAG  
GCACTAGTCAAGCAACCCCTGACCGCTGGCTATCCAACGCCCGCATGACCCACTATCAGGCGATGCTCCTAGATACGGA  
CCGGGTCCAGTTTCGGACCGGTGGTAGCCCTAAACCCGGCTACGTTGCTCCCCCTACCGGGGAAAGAGCCTCACCATGACT  
GCCTCGAGATCTTGCCGAGACACACGGAACCAGACCAGACCTCACGGACCAGCCCCCTCCAGACGCCGACCACACCTGG  
TATACAGATGGAAGCAGCTTCTTACAAGAGGGACAACGTAGGGCTGGAGCAGCGGTGACCACCGAGACCGAGGTAATCTG  
GGCCAAGGCGTTGCCAGCCGGGACATCCGCCCAGCGAGCTGAACTAATAGCACTCACCCAGGCCCTAAAGATGGCAGAAG  
GTAAGAAGCTAAATGTTTATACTGATAGCCGCTATGCCTTTGCTACCGCCCATGTCCATGGAGAAATATATAGGAGACGT  
GGGTTGCTCACCTCAGAAGGCAAGGAGATCAAGAACAAGGGCGAAATCTTGGCCTTACTGAAAGCTCTCTTTCTGCCCAA  
AAGACTCAGTATAATTCACTGCCCAGGACATCAGAAAGGCAATAGTGCTGAAGCTAAAGGCAACCGAATGGCGGACCAGG  
CAGCCCGGAAGCAGCCATGGGGACTGACACAAAGGCCTCCTCACTTCTCATAGAGACCTCAACCCCGTACACTCCAGAC  
TTCTTCCATTATACTGAGACAGATATAAAGAACCTACAAGAGTTGGGAGCCACATATGATAGAGAGAAAAAATATTGGGT  
CCTGCAAGGTAAACCTGTGATGCCTGACCAGTTCACCTTTGAATTATTAGACTTCCTTACCAGCTCACCCACCTTAGCT  
ATCAGAAGATGAGGGCACTTCTAGACAGGAAAGAAAGCCCCATTATACATGCTAAATAAAGATAAGATCCTCCACGAGGTG  
GCGGAATCATGCCAAGCCTGTGTCCAAGTAAATGCCAGTAAGACTAAGATCAGGGCCGGAACACGAGTAAGAGGACATCG  
ACCAGGCACCCATTGGGAAATTGACTTTACTGAAAGTGAAGCCCGGACTGTATGGGTACAAGTATCTCCTGGTATTCGTGG  
ACACGTTCTCTGGCTGGGTTGAAGCCTTCCCAACCAAAACATGAGACTGCCAAAATAGTGACCAAGAAACTTCTGAAAGAA  
ATATTTCCAAGGTTTGAATGCCCAAGTGTTGGGGACTGATAATGGGCCTGCCTTCGTCTCCAGGTAAGTCAGTCGGT  
GGCCAAGCTACTGGGGATTGATTGGAACCTACATTGTGCTTACAGACCCAGAGTTCAGGTGAGGTACAAAGAATAAATA  
GGACAATCAAGGAGACTTTGACCAAATTAACGCTTGCAACTGGCACTAGAGACTGGGTACTCCTACTTCCCTTGGCCCTC  
TACCGAGCCCGCAACACTCCGGGCCCCCATGGACTCATTCCGTATGAAATCCTGTATGGGGCGCCCCCGCCCTTGTTAA  
TTTCCATGATCCTGAAATGTCAAAGTTTACTAATAGCCCCCTCTCTCCAAGCTCACTTACAGGCCCTCCAAGCAGTACAAC  
GAGAGGTCTGGAAGCCACTGGCCGCTGCCTATCAGGACCAGCTGGACCAGCCAGTGATACCACACCCCTTCCGTGTGCGC  
GACACCGTGTGGGTACGCCGGCACCAGACTAAGAACTTGAACTTCGCTGGAAAGGACCCTACACCGTCTGCTGACCAC  
CCCCACCGCTCTCAAAGTAGACGGCATCGCTGCGTGGATCCACGCCGCTCACGTAAAAGCGGCGACAACCCCTCCGGCCG  
GAACAGCATCAGGACCGACATGGAAGGTCCAGCGTTCTCAAACCCCTTAAAGATAAGATTAACCCGTGGGGCCCCCTAA

TAGTCCTGAGAATCTTAATAAGGGCAGGAGTATCAGTACAACATGACAGCCCTCATCAGGTCTTCAATGTTACTTGGAGA  
GTTACCAACTTAATGACAGGACAAACAGCTAATGCTACCTCCCTCCTGGGGACAATGACCGATGCCTTTTCTAAACTGTA  
CTTTGACTTGTGCGATTTAATAGGGGACGACTGGGATGAGACTGGACTCGGGTGTGCGACTCCCGGGGGAAGAAAAAGGG  
CAAGAACATTTGACTTCTATGTTTGGCCCGGGCATACTGTACCAACAGGGTGTGGAGGGCCGAGAGAGGGCTACTGTGGC  
AAATGGGGCTGTGAGACCACTGGACAGGCATACTGGAAGCCATCATCATCATGGGACCTAATTTCCCTTAAGCGAAGAAA  
CACCCCTCAGAATCAGGGCCCCCTGTTATGATTCCCTCAGCGGTCTCCAGTGACATCAAGGGCGCCACACCGGGGGGTGCGAT  
GCAATCCCCTAGTCCTGGAATTCAGTGACGCGGGCAAAAAGGCCAGCTGGGATGGCCCCAAAGTATGGGGACTAAGACTG  
TACCGATCCACAGGGACCGACCCGGTGACCCGGTTCTCTTTGACCCGCCAGGTCTCAATATAGGGCCCCGCGTCCCCAT  
TGGGCCTAATCCCGTGATCACTGACCAGTTACCCCCCTCCCGACCCGTGCAGATCATGCTCCCCAGGCCCTCTCAGCCTC  
CTCCTCCAGGCGCCGCTCTATAGTCCCTGAGACTGCCCCACCTTCTCAACAACCTGGGACGGGAGACAGGCTGCTAAAC  
CTGGTAGATGGAGCCTACCAAGCTCTCAACCTCACCAGTCTGACAAAACCCAAGAGTGCTGGTTGTGTCTGGTAGCGGG  
ACCCCCCTACTACGAAGGGGTTGCCGTCCTAGGTACTTATTCCAACCATACCTCTGCCCCAGCTAACTGCTCCGTGGCCT  
CCCAACACAAGCTGACCCTGTCCGAAGTGACCGGACAGGGACTCTGCGTAAGAGCAGTTCCCAAAACCCATCAGGCCCTG  
TGTAATACCACCCAGAAGACGAGCGACGGGTCTACTATCTGGCTGCTCCCGCCGGGACCATTGTTGGGCTTGCAACACCGG  
GCTCACTCCCTGCCTATCTACCACTGTGCTCGACCTCACCACCGATTACTGTGTCTGGTTGAGCTCTGGCCAAAGGTGA  
CCTACCACTCCCCTGGTTATGTTTATGGCCAGTTTGTAGAGAAAAACCAATATAAAAGAGAGCCGGTGTCTAACTCTG  
GCCCTGCTGTTGGGAGGACTTACTATGGGCGGCATAGCTGCAGGAGTAGGAACCGGGACTACAGCCCTAGTGGCCACCAA  
ACAATTCGAGCAGCTCCAGGCAGCCATACATACAGACCTTGGGGCTTTAGAAAAGTCAGTCAGTGCCCTAGAAAAGTCTC  
TGACCTCGTTGTCTGAGGTGGTCTACAGAACCGGAGGGGATTAGATCTACTGTTCTTAAAGAAGGAGGATTATGTGCT  
GCCCTAAAAAAGAATGCTGTTTCTACGCGGACCACACTGGCGTAGTAAGAGATAGCATGGCAAAGCTAAGAGAAAGGTT  
GAACCAGAGACAAAATTTGTTTGAATCAGGACAAGGGTGGTTTGGAGGACTGTTTAAACAGGTCCCCATGGTTTACGACCT  
TAATATCCACCATTATGGGCCCCCTTGATAATACTTTTTATTAATCCTACTCTTCGGACCCTGTATTCTCAACCGCTTGGTC  
CAGTTTGTAAAAGACAGAATTTCCGTAGTGCAGGCCCTGGTTTTGACCCAACAGTATCACCAACTCAAATCAATAGATCC  
AGAAAAAGTGGAATCACGTGAATAAAAGATTTTATTAGTTTCCAGAAAGAGGGGGGAATGAAAGACCCACCATCAGGC  
TTAGCAAGCTAGCTGCAGTAACGCCATTTTGAAGGCATGAAAAAGTACCAGAGCTAAGTTCTCAAAAGTTACAAGAAAG  
TTCAGTTAAAGATTAAACAGTTAAAGATTAAAGGCTGAATAATACTGGGACAGGGGCCAAATATCGGTGGTCAAGCACCTGG  
GCCCCGGCTCAGGGCCAAGAACAGATGGCTCTCAGACGTCAGTGTTAGCAGAACTAGCTTCACTGATTTAGAAAAATAGA  
GGTGCACAGTGCTCTGGCCACTCCTTGAACCTGTGTGCTGCCAATGTTCTGACCAGGTGTGTGCCCATTTGTTGAACCTT  
CATTAGACCCTCTCCTCGTACCCCTCCCATACCAATTTCTTGAAAAATAGACATTGTTTAGAATAAAAAAGTCCACCTCA  
GTTTTCCCAATGACCGAGAAATACCCCAAGCCTTATTGAACTAACCAACCAGCTCGCTTCTCGCTTCTGTAACCGCGC  
TTTTTGCTCCCCAGCCCCAGCCCTATAAAAAGGGTAAAAACTCCACACTCGGCGCGCCAGTCTCCGATAGACTGCGTCG  
CCCGGGTACCCGTGTTCTCAATAAAGCCTCTTGCTGTTTGCATCCGAATCGTGGTCTCGCTGGTCTTGAGAGGGTCTCC  
TCAGATTGATTGACTACCCACGTGCGGGGTCTTTCA

>Pmv11

TGAAAGACCCACCATCAGGCTTAGCAAGCTAGCTGCAGTAACGCCATTTTGAAGGCATGAAAAAGTACCAGAGCTGAG  
TTCTCAAAAGTTACAAGAAAGTTCAAGTTAAAGATTAACAGTTAAAGATTAAGGCTGAATAATACTGGGACAGGGGCCAAA  
TATCGGTGGTCAAGCACCTGGGCCCCGGCTCAGGGCCAAGAACAGATGGCTCTCAGACGTCAGTGTTAGCAGAACTAGCT  
TCACTGATTTAGAAAAATAGAGGTGCACAGTGCTCTGGCCACTCCTTGAACCTGTGTGTCTGCCAATGTTCTGACCAGGT  
GTGTGCCCATTGTTGAACCTTCATTAGACCCTTTTCTCGTACCCCTCCCATACCCATTTCTTGAAAATAGACATTGTTTA  
GAACTAAAAAGTCCCACCTCAGTTTTCCCAATGACCGAGAAATACCCCAAGCCTTATTGAACTAACCAACCAGCTCGC  
TTCTCGCTTCTGTAACCGCGCTTTTTGCTCCCCAGCCCCAGCCCTATAAAAAGGGTAAAAACTCCACACTCGGCGCGCCA  
GTCCTCCGATAGACTGCGTCGCGCGGTACCCGTGCTCCCAATAAAGCCTCTTGCTGTTTGCATCCGAATCGTGGTCTCG  
CTGGTCTTTGAGAGGGTCTCCTCAGATTGATTGACTACCCACGTGCGGGGTCTTTCAATTTGGAGGTCCCACCGAGATTG  
GAGACCCCTGCCCAGGGACACCGACCCCCCGCGGGAGGTAAGCTGGCCAGCGGTGTTTTCTGTCTGTCTGTCTT  
CGTGCGTGTTTGTGCGGCATCCAATGTTTGCGCCTGCGTCTGTACTAGTTAGCTAAGTATGATCTGTATCTGGCGGTTCC  
GCGGAAGAAGTACAGAGTTGTTATTTCCGGCCGACCCCTGGGAGACGTCCAGCGGCCCTCGGGGGCCGTTTTGTGGC  
CCATTCTGTATCAGTTAACTACCCGAGTCGGACTTTTTGGAGCTCCGCCACTGTACGTGGCTTTGTTGGGGGACGAGAG  
ACAGAGACACTTCCCGCCCCCGTCTGAATTTTTGCTTTTGGTTTTACGCCGAAGCCGCGCGCGCTGTGATTTGTTTGT  
TGTTCTTTTGTCTTCTGTTAGTTTTCTTCTGTCTTTAAGTGTTTTGAGATCATGGGACAGACCGTAACACCCCTCTGA  
GTTTAACTTGCAGCACTGGGGAGATGTCCAGCGCATTGCATCCAACCAGTCTGTGGATGTCAAGAAGAGGCGCTGGATT  
ACCTTCTGTTCCGCTGAATGGCCAACTTTCAATGTGGGATGGCCTCAGGATGGTACTTTCAATTTAAGTATTATCTCTCA  
GGTTAAGTCTAGAGTGTTTTGTCTGGTCCCCACGGACACCCGGATCAGGTCCCATATATCGTCACCTGGGAGGCACTTG  
CCTATGACCCCCCTCCGTGGGTCAAACCGTTTGTGTCTCCTAAACTTCTCCCTTGCCGACAGCTCCCGTCTCCCGCCC  
GGTCTTTCTGCGCAACCTCCGTCCCGATCTGCCCTTTACCCTGCCCTTACCCCTCTATAAAGTCCAAACCTCCTAAGCC  
CCAGGTTCTCCCTGATAGCGGCGGACCCCTCATTGACCTTCTCACAGAGGACCCCCCGCGGTACAGAGCACAAACCTCCT  
CCTCTGCCAGGGAGAACGACGAAGAAGAGGCGGCCACCACCTCCGAGGTTTTCCCCCTTCTCCCATGGTGTCTCGACTG  
CGGGGAAGGAGAGACCCTCCCGCAGTGGACTCCACCACCTCCAGGCATTTCCACTCCGCATGGGGGGAGATGGCCAGCT

TCAGTATTGGCCGTTTTCTCTTCGGATTTATACAATTGGAAAAATAATAACCCTTCCTTTTCTGAAGATCCAGGTAAAT  
TGACGGCCTTGATTGAGTCCGTCTCATCACCCACCAGCCCACCTGGGACGACTGTCAGCAGTTGTTGGGGACCCTGCTG  
ACCGGAGAAGAAAAGCAGCGGGTGCTCCTAGAGGCTAGAAAGGCAGTCCGGGGCAATGATGGACGCCCCACTCAGTTGCC  
TAATGAAGTCAATGCTGCTTTTTCCCCTTGAACGCCCCGGTTGGGATTACACCCTACAGAAGGTAGGAACCACCTAGTCC  
TCTATCGCCAGTTGCTCTTAGCGGGTCTCCAGAACGCGGGCAGAAGTCCCACCAATTTGGCCAAGGTAAAAGGGATAACC  
CAGGGACCTAATGAGTCTCCCTCAGCCTTTTTAGAGAGACTCAAAGAGGCCTATCGCAGGTACACTCCTTATGACCCTGA  
GGACCCAGGGCAAGAAACCAATGTGTCTATGTCAATTCATCTGGCAGTCTGCCCCGGATATCGGGCGAAAGTTAGAGCGGT  
TAGAAGATTTAAAGAGCAAGACCTTAGGAGACTTAGTGAGGGAAGCTGAAAAGATCTTTAATAAGCGAGAAAACCCCGAA  
GAAAGAGAGGAACGTATCAAGAGAGAAAACAGAGGAAAAAGAAGAACGCCGTAGGGCAGAGGATGAGCAGAGAGAGAAAGA  
AAGGGACCGCAGAAGACATAGAGAGATGAGCAAGCTCTTGGCCACTGTAGTTATTGGTCAGAGACAGGATAGACAGGGGG  
GAGAGCGGAGGAGGCCCCAATTGATAAGGACCAATGCGCCTACTGCAAAGAAAAGGGACACTGGGCTAAGGACTGCCCA  
AAGAAGCCACGAGGGCCCCGAGGACTGAGGCCCCAGACCTCCCTCCTAACCTTAGGTGACTAGGGAGGTCAGGGTCAGGA  
GCCCCCCCCCTGAACCCAGGATAACCCTCAAAGTCGGGGGGCAACCCGTCACCTTCCTGGTAGATACTGGGGCCCCAACCT  
CCGTGCTGACCCAAAATCCTGGACCCCTAAGTGACAAGGCTGCCTGGGTCCAAGGGGCTACTGGAGGAAAGCGGTATCGC  
TGGACCACGGATCGCAAAGTACATCTAGCTACCGGTAAGGTCACCCACTCTTTCCTCCATGTACCAGACTGCCCCATCC  
TCTGCTAGGAAGAGACTTGCTGACTAACTAAAAGCCCAAATCCACTTCGAGGGATCAGGAGCTCAGGTTATGGGACCAA  
TGGGACTGCCCCCTGCAAGTGCTGACCCTAAACATAGAAGATGAGTATCGGCTACATGAGACCTCAAAGAGCCGGATGTT  
TCTCTAGGGTCCACCTGGCTTTCTGATTTTCCCCAGGTCTGGGCGGAAACCGGGGGCATGGGACTGGCAGTTTCGCCAAGC  
TCCTCTGATCATACCTCTGAAGGCAACCTCTACCCCCGTGTCCATAAAACAATACCCCATGTCCACAAGAAGCCAGACTGG  
GGATCAAGCCCCACATACAGAGACTGTTGGACCAGGGAATACTGGTACCCTGCCAGTCCCCCTGGAACACGCCCCCTGCTA  
CCCGTTAAGAAACCAGGGACTAATGATTATAGGCCTGTCCAGGATCTGAGAGAAAGTCAACAAGCGGGTGGAAGACATCCA  
CCCCACCGTGCCCCAACCTTACAACCTCTTGAGCGGGCTCCCACCGTCCCACCAGTGGTACACTGTGCTTGATTTAAAGG  
ATGCCTTTTTCTGCCTGAGACTCCACCCCACCAGTCAGCCTCTCTTCGCCTTTGAGTGGAGAGATCCAGAGATGGGAATC  
TCAGGACAATTGACCTGGACCAGACTCCCACAGGGTTTCAAAAACAGTCCCACCCTGTTTGATGAGGCACCTGCACAGAGA  
CCTAGCAGACTTCCGGATCCAGCACCCAGACTTGATCCTGCTACAGTACGTGGATGACTTACTGCTGGCCGCCACTTCTG  
AGCTCGACTGCCAACAAGGTACTCGGGCCCTGTTACAAACCTTAGGGGACCTCGGGTATCGGGCCTCGGCCAAGAAAGCC  
CAAATTTGCCAGAAACAGGTCAAGTATCTGGGGTATCTTCTAAAAGAGGGTCAGAGATGGCTGACTGAGGCCAGAAAAGA  
GACTGTGATGGGGCAGCCTACTCCGAAGACCCCTCGACAATAAGGGAGTTTCTAGGGACGGCAGGCTTCTGTGCCTCT  
GGATCCCTGGGTTTGAGAAATGGCAGCCCCCTTGTAACCTCTCACAAAACGGGGACTCTGTTTAATTGGGGCCAGAC  
CAGCAAAAGGCCTATCAAGAAATCAAACAGGCTCTTCTAACTGCCCCAGCCCTGGGATTGCCAGATTTGACTAAGCCCTT  
TGAACCTCTTTGTTGACGAGAAGCAGGGCTACGCCAAAGGCGTCCTAACGCAAAAACCTGGGACCTTGGCGTCGGCCGGTGG  
CCTACCTGTCCAAAAGCTAGACCCAGTGGCAGCTGGGTGGCCCCCTTGCTACGGATGGTAGCAGCCATTGCCGTTCTG  
ACAAAAGATGCAGGCAAGCTAACCATGGGACAGCCGCTAGTCATCCTGGCCCCCATGCAGTAGAGGCCTAGTCAAGCA  
ACCCCTGACCGCTGGCTATCCAACGCCCGCATGACCCACTATCAGGCGATGCTCCTAGATACGGACCGGGTCCAGTTTCG  
GACCGGTGGTAGCCCTAAACCCGGCTACGTTGCTCCCCCTACCGGGGAAAGAGCCTCACCATGACTGCCTCGAGATCTTG  
GCCGAGACACACGGAACCAGACCAGACCTCACGGACCAGCCCCCTCCAGACGCCGACCACACCTGGTATACAGATGGAAG  
CAGCTTCCTGCAAGAGGGACAACGTAGGGCTGGAGCAGCGGTGACCACCGAGACCGAGGTAATCTGGGCCAAGGCGTTGC  
CAGCCGGGACATCCGCCCAGCGAGCTGAACTAATAGCACTCACCCAGGCCCTAAAGATGGCAGAAGGTAAGAAGCTAAAT  
GTTTATACTGATAGCCGCTATGCCTTTGCTACCGCCCATATCCATGGAGAAATATATAGGAGACGTGGGTGCTCACCTC  
AGAAGGCAAGGAGATCAAGAACAAGGGCGAAATCTTGGCCTTACTGAAAGCTCTCTTTCTGCCCCAAAAGACTCAGTATAA  
TTCCTGCCCAGGACATCAGAAAGGCAATAGTGCTGAAGCTAAAGGCAACCGAATGGCGGACCAGGCAGCCCGGAAGCG  
GCCATGGGGACTGACACAAAGGCCTCCTCACTTCTCATAGAGACCTCAACCCCGTACACTCCAGACTTCTTCCATTATAC  
TGAGACAGATATAAAGAACCTACAAGAGTTGGGAGCCACATATGATAGAGAGAAAAAATATTGGGTCTGCAAGGTAAAC  
CTGTGATGCCTGACCAGTTCACCTTTGAATTATTAGACTTCCTTACCAGCTCACCCACCTTAGCTATCAGAAGATGAGG  
GCACTTCTAGACAGGAAAGAAAGCCCCATTATACATGCTAAATAAAGATAAGATCCTCCACGAGGTGGCGGAATCATGCCA  
AGCCTGTGTCCAAGTAAATGCCAGTAAGACTAAGATCAGGGCCGGAACACAGAGTAAGAGGACATCGACCAGGCACCCATT  
GGGAAATTGACTTTACTGAAGTGAAGCCCGGACTGTATGGGTACAAGTATCTCCTGGTATTCGTGGACACGTTCTCTGGC  
TGGGTTGAAGCCTTCCCAACCAAACATGAGACTGCCAAAATAGTGACCAAGAAACTTCTGGAAGAAATATTTCCAAGGTT  
TGGAATGCCCCAAGTGTTGGGGACTGATAATGGGCCTGCCTTCGTCTCCAGGTAAGTCAGTCGGTGGCCAAGCTACTGG  
GGATTGATTGGAACCTACATTGTGCTTACAGACCCAGAGTTCAGGTCAGGTAGAAAGAATGAATAGGACAATCAAGGAG  
ACTTTGACCAAATTAACGCTTGCAACTGGCACTAGAGACTGGGTACTCCTACTTCCCTTAGCCCTCTACCGAGCCCGCAA  
CACTCCGGGCCCCCATGGACTCACTCCGTATGAAATCCTGTATGGGGCGCCCCCGCCCTTGTTAATTTCCATGATCCTG  
AAATGTCAAAGTTTACTAATAGCCCCCTCTCTCCAAGCTCACTTACAGGCCCTCCAAGCAGTACAACGAGAGGTCTGGAAG  
CCACTGGCCGCTGCCTATCAGGACCAGCTGGACCAGCCAGTGATACCACACCCCTTCCGTGTGCGCGACACCGTGTGGGT  
ACGCCGGCACCAGACTAAGAACTTGGAACCTCGCTGGAAAGGACCCTACACCGTCTGCTGACCACCCCCACCGCTCTCA  
AAGTAGACGGCATCGCTGCGTGGATCCACGCCGCTCACGTAAAAGCGGCGACAACCCCTCCGGCCGGAACAGCATCAGGA  
CCGACATGGAAGGTCCAGCGTTCTCAAAACCCCTTAAAGATAAGATTAACCCGTGGGGCCCCCTAATAATCCTGGGGATC

TTAATAAGAGCAGGAGTATCAGTACAACATGACAGCCCTCATCAGGTCTTCAATGTTACTTGGAGAGTTACCAACTTAAT  
GACAGGACAAACAGCTAATGCTACCTCCCTCCTGGGGACAATGACCGATGCCTTTCCTAAACTGTACTTTGACTTGTGCG  
ATTTAATAGGGGACGACTGGGATGAGACTGGACTCGGGTGTGCGACTCCCGGGGAAGAAAAAGGGCAAGAACATTTGAC  
TTCTATGTTTGGCCCGGGCATACTGTACCAACAGGGTGTGGAGGGCCGAGAGAGGGCTACTGTGGCAAATGGGGCTGTGA  
GACCACTGGACAGGCATACTGGAAGCCATCATCATCATGGGACCTAATTTCCCTTAAGCGAGGAAACACCCCTCGGAATC  
AGGGCCCCCTGTTATGATTCCCTCAGCGGTCTCCAGTGACATCAAGGGCGCCACACCGGGGGGTGCGATGCAATCCCTTAGTC  
CTGGAATTAAGTACGCGGGCAAAAAGGCCAGCTGGGATGGCCCCAAAGTATGGGGACTAAGACTGTACCGATCCACAGG  
GACCGACCCGGTGACCCGGTTCTCTTTGACCCGCCAGGTCTCAATATAGGGCCCCGCGTCCCCATTGGGCCTAATCCCG  
TGATCACTGACCAAGTTACCCCCCTCCCGACCCGTGAGATCATGCTCCCCAGGCCTCCTCAGCCTCCTCCTCCAGGCGCA  
GCCTCTATAGTCCCTGAGACTGCCCCACCTTCTCAACAACCTGGGACGGGAGACAGGCTGTAAACCTGGTAGATGGAGC  
CTACCAAGCTCTCAACCTCACCAGTCTGACAAAACCCAAGAGTGCTGGTTGTGTCTGGTAGCGGGACCCCCCTACTACG  
AAGGGGTTGCCGTCTAGGTACTTATTCCAACCATACCTCTGCCCCAGCTAACTGCTCCGTGGCCTCCCAACACAAGCTG  
ACCCTGTCCGAAGTGACCGGACAGGGACTCTGCGTAGGAGCAGTTCCCAAACCCATCAGGCCCTGTGTAATACCACCCA  
GAAGACGAGCGACGGGTCTACTATCTGGCTGCTCCCGCCGGGACCATTGGGGCTTGCAACACCGGGCTCACTCCCTGCC  
TATCTACCACTGTACTCGACCTCACCACCGATTACTGTGTCTGGTTGAGCTCTGGCCAAAGGTGACCTACCACTCCCT  
GGTTATGTTTATGGCCAGTTTGGAGAAAAAACCAATATAAAAGAGAGCCGGTGTCAATTAAGTCTGGCCCTGCTGTTGGG  
AGGACTTACTATGGGCGGCATAGCTGCAGGAGTAGGAACCGGGACTACAGCCCTAGTGGCCACCAACAATTCGAGCAGC  
TCCAGGCAGCCATACATACAGACCTTGGGGCTTTAGAAAAGTCAGTCAGTGCCCTAGAAAAGTCTCTGACCTCGTTGTCT  
GAGGTGGTCTACAGAACCGGAGGGGATTAGATCTACTGTTCTTAAAGAAGGAGGATTATGTGCTGCCCTAAAAGAAGA  
ATGCTGTTTCTACGCGGACCACACTGGCGTAGTAAGAGATAGCATGGCAAAGCTAAGAGAAAGGTTGAACCAGAGACAAA  
AATTGTTTCAATCAGGACAAGGGTGGTTTGGAGGACTGTTTAAACAGGTCCCATGGTTTACGACCTTAATATCTACCATT  
ATGGGCCCCCTTGATAATACTTTTATTAATCCTACTCTTCGGACCTGTATTCTCAACCGCTTGGTCCAGTTTGTAAAAGA  
CAGAATTTCCGTAGTGCAGGCCCTGGTTTGGACCAACAGTATCACCAACTCAAATCAATAGATCCAGAAGAAGTGGAAT  
CACGTGAATAAAAGATTTTATTAGTTTCCAGAAAGAGGGGGGAATGAAAGACCCACCATCAGGCTTAGCAAGCTAGCT  
GCAGTAACGCCATTTTGAAGGCATGAAAAAGTACCAGAGCTGAGTTCTCAAAAGTTACAAGAAAGTTAGTTAAAGATT  
AACAGTTAAAGATTAAGGCTGAATAATACTGGGACAGGGGCCAAATATCGGTGGTCAAGCACCTGGGCCCCGGCTCAGGG  
CCAAGAACAGATGGCTCTCAGACGTCAGTGTTAGCAGAAGTCTGCTGATTTAGAAAAATAGAGGTGCACAGTGTCT  
TGGCCACTCCTTGAACCTGTGTGTCTGCCAATGTTCTGACCAGGTGTGTGCCATTGTTGAACCTTCATTAGACCTTTTC  
CTCGTACCCCTCCCATACCAATTTCTTGAAAAATAGACATTGTTTGAAGTAAAAAGTCCACCTCAGTTTCCCCAAATGA  
CCGAGAAATACCCCAAGCCTTATTGAACTAACCAACCAGCTCGCTTCTCGCTTCTGTAACCGCGCTTTTTGCTCCCCAG  
CCCCAGCCCTATAAAAAGGGTAAAAACTCCACACTCGGCGCGCCAGTCTCCGATAGACTGCGTGCAGCGGGTACCCGTG  
CTCCCAATAAAGCCTCTTGCTGTTTGCATCCGAATCGTGGTCTCGCTGGTCTTGAGAGGGTCTCCTCAGATTGATTGAC  
TACCCACGTGCGGGGTCTTTCA

>Pmv12

TGAAAGACCCCAACCATCAGGCTTAGCAAGCTAGCTGCAGTAACGCCATTTTGAAGGCATGAAAAAGTACCAGAGCTGAG  
TTCTCAAAAGTTACAAGAAAGTTAGTTAAAGATTAACAGTTAAAGATTAAGGCTGAATAATACTGGGACAGGGGCCAAA  
TATCGGTGGTCAAGCACCTGGGCCCCGGCTCAGGGCCAAGAACAGATGGCTCTCAGACGTCAGTGTTAGCAGAAGTACTGCT  
TCACTGATTTAGAAAAATAGAGGTGCACAGTGTCTGGCCACTCCTTAAACCTGTGTGTCTGCCAATGTTCTGACCAGGT  
GTGTGCCCATTGTTGAACCTTCATTAGACCTTTTCTCGTACCCCTCCCATACCCATTTCTTGAAAAATAGACATTGTTTA  
GAACTAAAAAGTCCCACCTCAGTTTCCCCAAATGACCGAGAAATACCCCAAGCCTTATTGAACTAACCAACCAGCTCGC  
TTCTCGCTTCTGTAACCGCGCTTTTTGCTCCCCAGCCCCAGCCCTATAAAAAGGGTAAAAACTCCACACTCGGCGCGCCA  
GTCCTCCGATAGACTGCGTGCAGCGGGTACCCGTGTTCCCAATAAAGCCTCTTGCTGTTTGCATCCGAATCGTGGTCTCG  
CTGGTCTTTGAGAGGGTCTCCTCAGATTGATTGACTACCCACGTGCGGGGTCTTTCAATTTGGAGGTTCCACCGAGATTG  
GAGACCCCTGCCCAGGGACACCGACCCCCCGCCGGGAGGTAAGCTGGCCAGCGGTGCTTTCTGTGTCTGTCTCTGTCTTC  
GTGCGTGTGTTGTGCCGCGCATCAATGTTTGCCTGCGTCTGTACTAGTTAGCTAACTAGATCTGTATCTGGCGGTTCCG  
CGGAAGAACTGACGAGTTCTGATTTCCCGCCGACCCCTGGGAGACGTCCCAGCGGCCTCGGGGGCCCGTTTTGTGGCC  
CATTCTGTATCAGTTAACTACCCGAGTCGGACTTTTTGGAGCTCCGCCACTGTACGTGGCTTTGTTGGGGGACGAGAGA  
CAGAGACACTTCCCGCCCCCGTCTGAATTTTTGCTTTTCGGTTTTACGCCGAAGCCGCGCCGCGCTGTGATTTGTTTGT  
GTTCTTTTGTCTTCTGTTAGTTTTCTTCTGTCTTTAAGTGTTTTCGAGATCATGGGACAGACCGTAACCTACCCCTCTGAG  
TTTAACCTTGCAGCACTGGGGAGATGTCCAGCGCATTGCATCCAACAGTCTGTGGATGTCAGGAAGAGGCGCTAGATTA  
CCTTCTGTTCCGCCGAATGGCCAACCTTCAATGTGGGATGGCCTCAGGATGGTACTTTCAATTTAAGTATTATCTCTCAG  
GTTAAGTCTAGAGTGTTTTGTCTGGTCCCCACGGACACCCGGATCAGGTCCCATATATCGTCACCTGGGAGGCACCTTGC  
CTATGACCCCCCTCCGTGGGTCAAACCGTTTTGTGTCTCTTAAACTTCTCCTCCCTTGCCGACAGCTCCCGTCTCCCGCCCC  
GTCCTTCTGCGCAACCTCCGTCCCGATCTGCCCTTTACCCTGCCCTTACCCCTCTATAAAGTCCAAACCTCCTAAGCCC  
CAGGTTCTCCCTGATAGCGGCGGACCCCTCATTGACCTTCTCACAGAGGACCCCCCGCGTACAGAGCACAACCTCCTC  
CTCTGCCAGGGAGAACGACGAAGAAGAGGCGGCCACCACCTCCGAGGTTTTCCCCCTTCTCCCATGGTGTCTCGACTGC  
GGGGAAGGAGAGACCTCCCGCAGTGGACTCCACCACCTCCAGGCATTTCCACTCCGCATGGGGGGAGATGGCCAGCTT

CAGTATTGGCCGTTTTCTCTTCGGATTTATACAATTGGAAAAATAATAACCCCTTCCTTTTTCTGAAGATCCAGGTAAATT  
GACGGCCTTGATTGAGTCCGTCTCATCACCCACCAGCCACCTGGGACGACTGTCAGCAGTTGTTGGGGACCCTGCTGA  
CCGGAGAAGAAAAGCAGCGGGTGCTCCTAGAGGCTAGAAAGGCAGTCCGGGGCAATGATGGACGCCCCACTCAGTTGCCT  
AATGAAGTCAATGCTGCTTTTTCCCTTTGAACGCCCCGGTTGGGATTACACCACTACAGAAGGTAGGAACCACCTAGTCCT  
CTATCGCCAGTTGCTCTTAGCGGGTCTCCAGAACGCGGGCAGAAGTCCCACCAATTTGGCCAAGGTAAAAGGGATAACCC  
AGGGACCTAATGAGTCTCCCTCAGCCTTTTTAGAGAGACTCAAAGAGGCCTATCGCAGGTACACTCCTTATGACCCTGAG  
GACCCAGGGCAAGAAACCAATGTGTCTATGTCAATTCATCTGGCAGTCTGCCCCGATATCGGGCGAAAGTTAGAGCGGTT  
AGAAGATTTAAAGAGCAAGACCTTAGGAGACTTAGTGAGGGAAGCTGAAAAGATCTTTAATAAGCGAGAAACCCCGGAAG  
AAAGAGAGGAACGTATCAAGAGAGAAACAGAGGAAAAAGAAGAACGCCGTAGGGCAGAGGATGAGCAGAGAGAGAAAGAA  
AGGGACCGCAGAAAGCATAGAGAGATGAGCAAGCTCTTGCCACTGTAGTTATTGGTCAGAGACAGGATAGACAGGGGGG  
AGAGCGGAGGAGGCCCACTTGATAAGGACCAATGCGCCTACTGCAAAGAAAAGGGACACTGGGCTAAGGACTGCCCAA  
AGAAGCCACGAGGGCCCCGAGGACTGAGGCCCCAGACCTCCCTCCTAACCTTAGGTGACTAGGGAGGTGAGGGTCAGGAG  
CCCCCCCCCTGAACCCAGGATAACCCCTCAAAGTCGGGGGGCAACCCGTACCTTCTGGTAGATACTGGGGCCCCAACACTC  
CGTGCTGACCCAAAATCCTGGACCCCTAAGTGACAAGGCTGCCTGGGTCCAAGGGGCTACTGGAGGAAAGCGGTATCGCT  
GGACCACGGATCGCAAAGTACATCTAGCTACCGGTAAGGTCACCCACTCTTTCCTCCATGTACCAGACTGCCCCCTATCCT  
CTGCTAGGAAGAGACTTGCTGACTAACTAAAAGCCCCAAATCCACTTCGAGGGATCAGGAGCCCAGGTTATGGGACCAAT  
GGGACTGCCCCTGCAAGTGCTGACCCTAAACATAGAAGATGAGTATCGGCTACATGAGACCTCAAAGAGCCGGATGTTT  
CTCTAGGGTCCACCTGGCTTTCTGATTTTCCCCAGGTCTGGGCGGAAACCGGGGGCATGGGACTGGCAGTTTCGCCAAGCT  
CCTCTGATCATACCTCTGAAGGCAACCTCTACCCCCGTGTCCATAAAACAATACCCCATGTACAAGAAGCCAGACTGGG  
GATCAAGCCCCACATACAGAGACTGTTGGACCAGGGAATACTGGTACCCTGCCAGTCCCCCTGGAACACGCCCCCTGCTAC  
CCGTTAAGAAACCAGGGACTAATGATTATAGGCCTGTCCAGGATCTGAGAGAAGTCAACAAGCGGGTGGAAGACATCCAC  
CCCACCGTGCCCAACCCTTACAACCTCTTGAGCGGGCTCCCACCGTCCCACCAGTGGTACACTGTGCTTGATTTAAAGGA  
TGCCTTTTTCTGCCTGAGACTCCACCCACCAGTCAGCCTCTCTTCGCCTTTGAGTGGAGAGATCCAGAGATGGGAATCT  
CAGGACAATTGACCTGGACCAGACTCCCACAGGGTTTCAAAAACAGTCCCACCCTGTTTGATGAGGCACTGCACAGAGAC  
CTAGCAGACTTCCGGATCCAGCACCCAGACTTGATCCTGCTACAGTACGTGGATGACTTACTGCTGGCCGCCACTTCTGA  
GCTCGACTGCCAACAAAGGTACTCGGGCCCTGTTACAAACCCTAGGGAACCTCGGGTATCGGGCCTCGGCCAAGAAAGCCC  
AAATTGTCCAGAAACAGGTCAAGTATCTGGGGTATCTTTAAAGAGGGTCAGAGATGGCTGACTGAGGCCAGAAAGAG  
ACTGTGATGGGACAGCCTACTCCGAAGACCCCTCGACAATAAGAGAGTTCTCCTAGGGACCGCAGGCTTCTGTGCTCCTG  
GATCCCTGGGTTTGCAGAAATGGCAGCCCCCTTGTAACCTCTCACAAAACGGGGACTCTGTTTAATTGGGGCCCAGACC  
AGCAAAAGGCCTATCAAGAAATCAAACAGGCTCTTCTAACTGCCCCAGCCCTGGGATTGCCAGATTTGACTAAGCCCTTT  
GAACTCTTTGTTGACGAGAAGCAGGGCTACGCCAAAGGCGTCTTAACGCAAAAACCTGGGACCTTGGCGTCGGCCGGTGGC  
CTACCTGTCCAAAAGCTAGACCCAGTGGCAGCTGGGTGGCCCCCTTGCTACGGATGGTAGCAGCCATTGCCGTTCTGA  
CAAAAGATGCAGGCAAGCTAACCATGGGACAGCCGCTAGTCATCCTGGCCCCCATGCAGTAGAGGCACTAGTCAAGCAA  
CCCCCTGACCGCTGGCTATCCAACGCCCCGATGACCCACTATCAGGCGATGCTCCTAGATACGGACCGGGTCCAGTTCCG  
ACCGGTGGTAGCCCTAAACCCGGCTACGTTGCTCCCCCTACCGGGGAAAGAGCCTCACCATGACTGCCTCGAGATCTTGG  
CCGAGACACACGGAACCAGACCAGACCTCACGGACCAGCCCCCTCCAGACGCCGACCATACTGGTATACAGATGGAAGC  
AGCTTCCTGCAAGAGGGACAACGTAGGGCTGGAGCAGCGGTGACCACCGAGACCGAGGTAATCTGGGCCAAGGCGTTGCC  
AGCCGGGACATCCGCCCAGCGAGCTGAACATAAGCACTCACCCAGGCCCTAAAGATGGCAGAAGGTAAGAAGCTAAATG  
TTTATACTGATAGCCGCTATGCCTTTGCTACCGCCCATGTCCATGGAGAAATATATAGGAGACGTGGGTTGCTCACCTCA  
GAAGGCAAGGAGATCAAGAACAAGGGCGAAATCTTGGCCTTACTGAAAGCTCTCTTTCTGCCCCAAAAGACTCAGTATAAT  
TCACTGCCCAGGACATCAGAAAGGCAATAGTGCTGAAGCTAAAGGCAACCGAATGGCGGACCAGGCAGCCCGGGAAGCAG  
CCATGGGGACTGACACAAAGGCCTCCTCACTTCTCATAGAGACCTCAACCCCGTACACTCCAGACTTCTTCCATTATACT  
GAGACAGATATAAAGAACCTACAAGAGTTGGGAGCCACATATGATAGAGAAAAAATATTGGGTCTGCAAGGTAAACC  
TGTGATGCCTGACCAGTTCACCTTTGAATTATTAGACTTCCTTACCAGCTCACCCACCTTAGCTATCAGAAGATGAGGG  
CACTTCTAGACAGGAAAGAAAGCCCTATTACATGCTAAATAAAGATAAGATCCTCCACGAGGTGGCGGAATCATGCCAA  
GCCTGTGTCCAAGTAAATGCCAGTAAGACTAAGATCAGGGCCGGAACACAGAGTAAGAGGACATCGACCAGGCACCCATTG  
GGAAATTGACTTTACTGAAGTGAAGCCCGGACTGTATGGGTACAAGTATCTCCTGGTATTCTGTTGACACGTTCTCTGGCT  
GGGTTGAAGCCTTCCCAACCAAACATGAGACTGCCAAAATAGTGACCAAGAAACTTCTGGAAGAAATATTTCCAAGGTTT  
GGAATGCCCCAAGTGTTGGGGACTGATAATGGGCCTGCCTTCGTCTCCCAGGTAAGTCAGTCGGTGGCCAAGCTACTGGG  
GATTGATTGGAACTACATTGTGCTTACAGACCCCAGAGTTCAGGTGAGGTAGAAAGAATGAATAGGACAATCAAGGAGA  
CTTTGACCAAATTAACGCTTGCAACTGGCACTAGAGACTGGGTACTCCTACTTCCCTTAGCCCTCTACCGAGCCCCGCAAC  
ACTCCGGGCCCCCATGGACTCACTCCGTATGAAATCCTGTATGGGGCGCCCCCGCCCCCTTGTTAATTTCCATGATCCTGA  
AATGTCAAAGTTTACTAATAGCCCCCTCTCTCCAAGCTCACTTACAGGCCCTCCAAGCAGTACAACGAGAGGTCTGGAAGC  
CACTGGCCGCTGCCTATCAGGACCAGCTGGACCAGCCAGTGATAACACACCCCTTCCGTGTGCGGACACCGTGTGGGT  
CGCCGGCACCAGACTAAGAATTGGAACCTCGCTGGAAAGGACCCTACACCGTCTGCTGACCACCCCCACCGCTCTCAA  
AGTAGACGGCATCGCTGCGTGGATCCACGCCGCTCACGTAAAAGCGGCGACAACCCCTCCGGCCGGAACAGCATCAGGAC  
CGACATGGAAGGTCCAGCGCTCTCAAACCCCTTAAAGATAAGATTAACCCGTGGGGCCCCCTAATAGTCCTGGGGATCT

TAATAAGGGCAGGAGTATCAGTACAACATGACAGCCCTCATCAGGTCTTCAATGTTACTTGGAGAGTTACCAACTTAATG  
ACAGGACAAACAGCTAATGCTACCTCCCTCCTGGGGACAATGACCGATGCCTTTCTTAACTGTACTTTGACTTGTGCGA  
TTTAATAGGGGACGACTGGGATGAGACTGGACTCGGGTGTGCGACTCCCGGGGGAAGAAAAAGGGCAAGAACATTTGACT  
TCTATGTTTTGCCCCGGGCATACTGTACCAACAGGGTGTGGAGGGCCGAGAGAGGGCTACTGTGGCAAATGGGGCTGTGAG  
ACCACTGGACAGGCATACTGGAAGCCATCATCATCATGGGACCTAATTTCCCTTAAGCGAGGAAACACCCCTCGGAATCA  
GGGCCCCCTGTTATGATTCCTCAGCGGTCTCCAGTGACATCAAGGGCGCCACACCGGGGGGTGATGCAATCCCCCTAGTCC  
TGGAATTCAGTGACGCGGGCAAAAAGGCCAGCTGGGATGGCCCCAAAGTATGGGGACTAAGACTGTACCGATCCACAGGG  
ACCGACCCGGTGACCCGGTTCTCTTTGACCCGCCAGGTCTCAATATAGGGCCCCGCGTCCCCATTGGGCCTAATCCCGT  
GATCACTGACCAGTTACCCCCCTCCCGACCCGTGCAGATCATGCTCCCCAGGCCTCCTCAGCCTCCTCCTCCAGGCGCAG  
CCTCTATAGTCCCTGAGACTGCCACCTTCTCAACAACCTGGGACGGGAGACAGGCTGCTAAACCTGGTAGATGGAGCC  
TACCAAGCTCTCAACCTCACCAGTCTTGACAAAACCAAGAGTGTGGTTGTGTCTGGTAGCGGGACCCCCCTACTACGA  
AGGGGTTGCCGTCTAGGTACTTATTCCAACCATACCTCTGCCCCAGCTAACTGCTCCGTGGCCTCCCAACACAAGCTGA  
CCCTGTCCGAAGTGACCGGACAGGGACTCTGCGTAGGAGCAGTTCCCAAAACCCATCAGGCCCTGTGTAATACCACCCAG  
AAGACGAGCGACGGGTCTACTATCTGGCTGCTCCCGCCGGGACCATTTGGGCTTGCAACACCGGGCTCACTCCCTGCCT  
ATCTACCACTGTACTCGACCTCACCACCGATTACTGTGTCTGGTTGAGCTCTGGCCAAAGGTGACCTACCACTCCCCTG  
GTTATGTTTTATGGCCAGTTTGGAGAAAAAACCAATATAAAAGAGAGCCGGTGTCAATTAACCTCTGGCCCTGCTGTTGGGA  
GGACTTACTATGGGCGGCATAGCTGCAGGAGTAGGAACCGGGACTACAGCCCTAGTGGCCACCAACAATTGAGCAGCT  
CCAGGCAGCCATACATACAGACCTTGGGGCTTTAGAAAAGTCAGTCAGTGCCCTAGAAAAGTCTCTGACCTCGTTGTCTG  
AGGTGGTCTACAGAATCGGAGGGGATTAGATCTACTGTTCTTAAAGAAGGAGGATTATGTGCTGCCCTAAAAGAAGAA  
TGCTGTTTTCTACGCGGACCACACTGGCGTAGTAAGAGATAGCATGGCAAAGCTAAGAGAAAGGTTGAACCAGAGACAAAA  
ATTGTTTCAATCAGGACAAGGGTGGTTTGGGGACTGTTTAAACAGGTCCCCTATGGTTACGACCTTAATATCCACCATTA  
TGGGCCCCCTTAATAATACTTTTATTAATCCTACTCTTCGGACCCCTGTATTCTCAACCGCTTGGTCCAGTTTGTAAAAGAC  
AGAATTTGCGTAGTGCAGGCCCTGGTTTGGACCCAACAGTATCACCAACTCAAATCAATAGATCCAGAAGAAGTGAATC  
ACGTGAATAAAAGATTTTATTTCAGTTTCCAGAAAGAGGGGGGAATGAAAGACCCCACCATCAGGCTTAGCAAGCTAGCTG  
CAGTAACGCCATTTTGAAGGCATGAAAAAGTACCAGAGCTGAGTTCTCAAAAGTTACAAGAAAGTTAGTTAAAGATTA  
ACAGTTAAAGATTAAAGCTGAATAATACTGGGACAGGGGCCAAATATCGGTGGTCAAGCACCTGGGCCCCGGCTCAGGGC  
CAAGAACAGATGGCTCTCAGACGTCAGTGTGTAGCAGAATAGCTTCACTGATTTAGAAAAATAGAGGTGCACAGTGTCT  
GGCCACTCCTTAAACCTGTGTGTCTGCCAATGTTCTGACCAGGTGTGTGCCCATTTGTTGAACCTTCATTAGACCCCTTCC  
TCGTACCCCTCCCATACCCATTTTCTTGAATAATAGACATTGTTTGAAGTAAAGTCCACCTCAGTTTCCCCAAATGAC  
CGAGAAATACCCCAAGCCTTATTGAACTAACCAACCAGCTCGCTTCTCGCTTCTGTAACCGCGCTTTTTGCTCCCCAGC  
CCCAGCCCTATAAAAAGGGTAAAACTCCACACTCGGCGCGCCAGTCTCCGATAGACTGCGTGCAGCGGGTACCCGTGT  
TCCCAATAAAGCCTCTTGCTGTTTGCATCCGAATCGTGGTCTCGCTGGTCTTGAGAGGGTCTCCTCAGATTGATTGACT  
ACCCACGTGCGGGGTCTTTCA

>Pmv13

TGAAAGACCCCACCATCAGGCTTAGCAAGCTAGCTGCAGTAACGCCATTTTGAAGGCATGAAAAAGTACCAGAGCTAAG  
TTCTCAAAAGTTACAAGAAAGTTAGTTAAAGATTAACAGTTAAAGATTAAGGCTGAATAATACCGGGACAGGGGCCAAA  
TATCGGTGGTCAAGCACCTGGGCCCCGGCTCAGGGCCAAGAACAGATGGCTCTCAGACGTCAGTGTGTAGCAGAACTAGCT  
TCACTGATTTAGAAAAATAGAGGTGCACAGAGCTCTGGCCACTCCTTGAACCTGTGTGTCTGCCAATGTTCTGACCAGGT  
GTGTGCCCATTGTTGAACCTTCATTAGACCTCTCCTCGTACCCCTCCCATACCCATTTCTTGAATAATAGACATTGTTTA  
GAACTAAAAAGTCCCACCTCAGTTTCCCCAAATGACCGAGAAATACCCCAAGCCTTATTGAACTAACCAACCAGCTCGC  
TTCTCGCTTCTGTAACCGCGCTTTTTGCTCCCCAGCCCCAGCCCTATAAAAAGGGTAAAACTCCACACTCGGCGCGCCA  
GTCCTCCGATAGACTGCGTGCAGCGGGTACCCGTGTTCCCAATAAAGCCTCTTGCTGTTTGCATCCGAATCGTGGTCTCG  
CTGGTCTTTGAGAGGGTCTCCTCAGATTGATTGACTACCCACGTGCGGGGTCTTTCAATTTGGAGGTCCCACCGAGATTG  
GAGACCCCTGCCCAGGGACACCGACCCCCCGCCGGGAGGTAAGCTGGCCAGCGGTGTTTTCGTGTCTGTCTCTGTCTTC  
GTGCGTGTGTTGTGCCGGCATCAATGTTTGCCTGCTGTACTAGTTAGCTAACTAGATCTGTATCTGGCGGTTCCG  
CGAAGAAGTACGAGTTCTGATTTCCCGGCCGAGCCCTGGGAGACGTCCCAGCGGCCTCGGGGCCGTTTTGTGGCC  
CATTCTGTATCAGTTAACCTACCCGAGTCGGACTTTTTGGAGCTCCGCCACTGTACGTGGCTTTGTTGGGGACGAGAAA  
CAGAGACACTTCCCGCCCCCGTCTGAATTTTTGCTTTTCGGTTTTACGCCGAAGCCGCGCGCGTCTGATTTGTTTGT  
GTTCTTTTGTCTTCTGTTAGTTTTCTTCTGTCTTTAAGTGTTTTCGAGATCATGGGACAGACCGTAACCTACCCCTCTGAG  
TTTAACCTTGCAGCACTGGGGAGATGTCCAGCGCATTGCATCCAACAGTCTGTGGATGTCAGGAAGAGGCGCTGGATTA  
CCTTCTGTTCCGCTGAATGGCCAACCTTCAATGTGGGATGGCCTCAGGATGGTACTTTCAATTTAAGTATTATCTCTCAG  
GTTAAGTCTAGAGTGTGTTTGTCTGGTCCCCACGGACACCCGGATCAGGTCCCATATATCGTCACCTGGGAGGCACCTGC  
CTATGACCCCCCTCCGTGGGTCAAACCGTTTTGTGTCTCCTAAACTTCTCCTTGGCCGACAGCTCCCGTCTCCCGCCCCG  
GTCCTTCTGCGCAACCTCCGTCCCGATCTGCCCTTTACCCTGCCCTTACCCCTCTATAAAGTCCAAACCTCCTAAGCCC  
CAGGTTCTCCCTGATAGCGGCGGACCCCTCATTGACCTTCTCACAGAGGACCCCCCGCGTACAGAGCACAACCTCCTC  
CTCTGCCAGGGAGAACGACGAAGAAGAGGCGGCCACCACCTCCGAGGTTTTCCCCCTTCTCCCATGGTGTCTCGACTGC  
GGGGAAGGAGAGACCCCTCCCGCAGTGGACTCCACCACCTCCAGGCATTTCCACTCCGCATGGGGGGAGATGGCCAGCTT

CAGTATTGGCCGTTTTCTCTTCGGATTTATACAATTGGAAAAATAATAACCCCTTCCTTTTTCTGAAGATCCAGGTAAATT  
GACGGCCTTGATTGAGTCCGTCTCATCACCCACCAGCCACCTGGGACGACTGTCAGCAGTTGTTGGGGACCCTGCTGA  
CCGGAGAAGAAAAGCAGCGGGTGCTCCTAGAGGCTAGAAAGGCAGTCCGGGGCGATGATGGACGCCCCACTCAGTTGCCT  
AATGAAGTCAATGCTGCTTTTTCCCTTTGAACGCCCCGGTTGGGATTACACCACTACAGAAGGTAGGAACCACCTAGTCCT  
CTATCGCCAGTTGCTCTTAGCGGGTCTCCAGAACGCGGGCAGAAGTCCCACCAATTTGGCCAAGGTAAAAGGGATAACCC  
AGGGACCTAATGAGTCTCCCTCAGCCTTTTTAGAGAGACTCAAAGAGGCCTATCGCAGGTACACTCCTTATGACCCTGAG  
GACCCAGGGCAAGAAACCAATGTGTCTATGTCAATTCATCTGGCAGTCTGCCCCGATATCGGGCGAAAGTTAGAGCGGTT  
AGAAGATTTAAAGAGCAAGACCTTAGGAGACTTAGTGAGGGAAGCTGAAAAGATCTTTAATAAGCGAGAAACCCCGGAAG  
AAAGAGAGGAACGTATCAAGAGAGAAACAGAGGAAAAAGAAGAACGCCGTAGGGCAGAGGATGAGCAGAGAGAGAAAGAA  
AGGGACCGCAGAAAGACATAGAGAGATGAGCAAGCTCTTGGCCACTGTAGTTATTGGTCAGAGACAGGATAGACAGGGGG  
AGAGCGGAGGAGGCCCACTTGATAAGGACCAATGCGCCTACTGCAAAGAAAAGGGACACTGGGCTAAGGACTGCCCAA  
AGAAGCCACGAGGGCCCCGAGGACTGAGGCCCCAGACCTCCCTCCTAACCTTAGGTGACTAGGGAGGTGAGGGTCAGGAG  
CCCCCCCCCTGAACCCAGGATAACCCCTCAAAGTCGGGGGGCAACCCGTACCTTCTTGGTAGATACTGGGGCCCCAACACTC  
CGTGCTGACCCAAAATCCTGGACCCCTAAGTGATAAGGCTGCCTGGGTCCAAGGGGCTACTGGAGGAAAGCGGTATCGCT  
GGACCACGGATCGCAAAGTACATCTAGCTACCGGTAAGGTCACCCACTCTTTCCTCCATGTACCAGACTGCCCCCTATCCT  
CTGCTAGGAAGAGACTTGCTGACTAACTAAAAGCTCAAATCCACTTCGAGGGATCAGGAGCTCAGGTTATGGGACCAAT  
GGGACTGCCCCTGCAAGTGCTGACCCTAAACATAGAAGATGAGTATCGGCTACATGAGACCTCAAAGAGCCGGATGTTT  
CTCTAGGGTCCACCTGGCTTTCTGATTTTCCCCAGGTCTGGGCGGAAACCGGGGCGATGGGACTGGCAGTTTCGCCAAGCT  
CCTCTGATCATACCTCTGAAGGCAACCTCTACCCCCGTGTCCATAAAACAATACCCCATGTACAAGAAGCCAGACTGGG  
GATCAAGCCCCACATACAGAGACTGTTGGACCAGGGAATACTGGTACCCTGCCAGTCCCCCTGGAACACGCCCCCTGCTAC  
CCGTTAAGAAACCAGGGACTAATGATTATAGGCCTGTCCAGGATCTGAGAGAAGTCAACAAGCGGGTGGAAGACATCCAC  
CCCACCGTGCCCAACCCTTACAACCTCTTGAGCGGGCTCCCACCGTCCCACCAGTGGTACACTGTGCTTGATTTAAAGGA  
TGCCTTTTTCTGCCTGAGACTCCACCCACCAGTCAGCCTCTCTTCGCCTTTGAGTGGAGAGATCCAGAGATGGGAATCT  
CAGGACAATTGACCTGGACCAGACTCCACAGGGTTTCAAAAACAGTCCCACCCTGTTTGATGAGGCACTGCACAGAGAC  
CTAGCAGACTTCCGGATCCAGCACCCAGACTTGATCCTGCTACAGTACGTGGATGACTTACTGCTGGCCGCCACTTCTGA  
GCTAGACTGCCAACAAAGGTACTCGGGCCCTGTTACAAACCCTAGGGAACCTCGGGTATCGGGCCTCGGCCAAGAAAGCCC  
AAATTGCGCAAGAACAGGTCAAGTATCTGGGGTATCTTTAAAGAGGGTCAGAGATGGCTGACTGAGGCCAGAAAGAG  
ACTGTGATGGGGCAGCCTACTCCGAAGACCCCTCGACAACCTAAGGGAGTTCTCAGGACCGCAGGCTTCTGTGCGCTCTG  
GATCCCTGGGTTTGCAGAAATGGCAGCCCCCTTGTAACCTCTCACAAAACGGGGACTCTGTTTAATTGGGGCCCAGACC  
AGCAAAAGGCCTATCAAGAAATCAAACAGGCTCTTCTAACTGCCCCAGCCCTGGGATTGCCAGATTTGACTAAGCCCTTT  
GAACTCTTTGTGACGAGAGAAGCAGGGCTACGCCAAAGGCGTCTTAACGCAAAAACCTGGGACCTTGGCGTCGGCCGGTGGC  
CTACCTGTCCAAAAGCTAGACCCAGTGGCAGCTGGGTGGCCCCCTTGCTACGGATGGTAGCAGCCATTGCCGTTCTGA  
CAAAAGATGCAGGCAAGCTAACCATGGGACAGCCGCTAGTCATCCTGGCCCCCATGCAGTAGAGGCACTAGTCAAGCAA  
CCCCCTGACCGCTGGCTATCCAACGCCCCGATGACCCACTATCAGGCGATGCTCCTAGATACGGACCGGGTCCAGTTCCG  
ACCGGTGGTAGCCCTAAACCCGGCTACGTTGCTCCCCCTACCGGGGAAAGAGCCTCACCATGACTGCCTCGAGATCTTGG  
CCGAGACACACGGAACCAGACCAGACCTCACGGACCAGCCCCCTCCAGACGCCGACCACACCTGGTATACAGATGGAAGC  
AGCTTCCTGCAAGAGGGACAACGTAGGGCTGGAGCAGCGGTGACCACCGAGACCGAGGTAATCTGGGCCAAGGCGTTGCC  
AGCCGGGACATCCGCCCAGCGAGCTGAACTAATAGCACTCACCCAGGCCCTAAAGATGGCAGAAGGTAAGAAGCTAAATG  
TTTATACTGATAGCCGCTATGCCTTTGCTACCGCCCATGTCCATGGAGAAATATATAGGAGACGTGGGTTGCTCACCTCA  
GAAGGCAAGGAGATCAAGAACAAGGGCGAAATCTTGGCCTTACTGAAAGCTCTCTTTCTGCCCAAAAGACTCAGTATAAT  
TCACTGCCCAGGACATCAGAAAGGCAATAGTGCTGAAGCTAAAGGCAACCGAATGGCGGACCAGGCAGCCCGGGAAGCAG  
CCATGGGGACTGACACAAAGGCCTCCTCACTTCTCATAGAGACCTCAACCCCGTACACTCCAGACTTCTTCCATTATACT  
GAGACAGATATAAAGAACCTACAAGAGTTGGGAGCCACATATGATAGAGAGAAAAAATATTGGGTCTGCAAGGTAAACC  
TGTGATGCCTGACCAGTTCACCTTTGAATTATTAGACTTCCTTACCAGCTCACCCACCTTAGCTATCAGAAGATGAGGG  
CACTTCTAGACAGGAAAGAAAGCCCTATTACATGCTAAATAAAGATAAGATCCTCCACGAGGTGGCGGAATCATGCCAA  
GCCTGTGTCCAAGTAAATGCCAGTAAGACTAAGATCAGGGCCGGAACACAGAGTAAGAGGACATCGACCAGGCACCCATTG  
GGAAATTGACTTTACTGAAGTGAAGCCCGGACTGTATGGGTACAAGTATCTCCTGGTATTCTGTGGACACGTTCTCTGGCT  
GGGTTGAAGCCTTCCCAACCAACATGAAACTGCCAAAATAGTGACCAAGAAACTTCTGGAAGAAATATTTCCAAGGTTT  
GGAATGCCCCAAGTGTTGGGGACTGATAATGGGCCTGCCTTCGTCTCCCAGGTAAGTCAGTCGGTGGCCAAGCTACTGGG  
GATTGATTGGAACTACATTGTGCTTACAGACCCCAGAGTTCAGGTGAGGTAGAAAGAATGAATAGGACAATCAAGGAGA  
CTTTGACCAAATTAACGCTTGCAACTGGCACTAGAGACTGGGTACTCCTACTTCCCTTAGCCCTCTACCGAGCCCGCAAC  
ACTCCGGGCCCCCATGGACTCACTCCGTATGAAATCCTGTATGGGGCGCCCCCGCCCCCTTGTTAATTTCCATGATCCTGA  
AATGTCAAAGTTTACTAATAGCCCCCTCTCTCCAAGCTCACTTACAGGCCCTCCAAGCAGTACAACGAGAGGTCTGGAAGC  
CACTGGCCGCTGCCTATCAGGACCAGCTGGACCAGCCAGTGATAACACACCCCTTCCGTGTGCGCGACACCGTGTGGGTA  
CGCCGGCACCAGACTAAGAAGTTGGAACCTCGCTGGAAAGGACCCTACACCGTCTGCTGACCACCCCCACCGCTCTCAA  
AGTAGACGGCATCGCTGCGTGGATCCACGCCGCTCACGTAAAAGCGGCGACAACCCCTCCGGCCGGAACAGCATCAGGAC  
CGACATGGAAGGTCCAGCGTTCTCAAACCCCTTAAAGATAAGATTAACCCGTGGGGCCCCCTAATAGTCCTGGGAATCT

TAATAAGGGCAGGAGTATCAGTACAACATGACAGCCCTCATCAGGTCTTCAATGTTACTTGGAGAGTTACCAACTTAATG  
ACAGGACAAACAGCTAATGCTACCTCCCTCCTGGGGACAATGACCGATGCCTTTCTTAACTGTACTTTGACTTGTGCGA  
TTTAATAGGGGACGACTGGGATGAGACTGGACTCGGGTGTGCGACTCCCGGGGGAAGAAAAAGGGCAAGAACATTTGACT  
TCTATGTTTTGCCCCGGGCATACTGTACCAACAGGGTGTGGAGGGCCGAGAGAGGGCTACTGTGGCAAATGGGGCTGTGAG  
ACCACTGGACAGGCATACTGGAAGCCATCATCATCATGGGACCTAATTTCCCTTAAGCGAAGAAACACCCCTCAGAATCA  
GGGCCCCCTGTTATGATTCCTCAGCGGTCTCCAGTGACATCAAGGGCGCCACACCGGGGGGTGATGCAATCCCCCTAGTCC  
TGGAATTCAGTGACGCGGGCAAAAAGGCCAGCTGGGATGGCCCCAAAGTATGGGGACTAAGACTGTACCGATCCACAGGG  
ACCGACCCGGTGACCCGGTTCTCTTTGACCCGCCAGGTCTCAATATAGGGCCCCGCGTCCCCATTGGGCCTAATCCCGT  
GATCACTGACCAGTTACCCCCCTCCCGACCCGTGCAGATCATGCTCCCCAGGCCTCCTCAGCCTCCTCCTCCAGGCGCAG  
CCTCTACAGTCCCTGAGACTGCCACCTTCTCAACAACCTGGGACGGGAGACAGGCTGCTAAACCTGGTAGATGGAGCC  
TACCAAGCTCTCAACCTCACCAGTCTTGACAAAACCAAGAGTGTGGTTGTGTCTGGTAGCGGGACCCCCCTACTACGA  
AGGGGTTGCCGTCTAGGTACTTATTCCAACCATACTCTGCCCCAGCTAACTGCTCCGTGGCCTCCCAACACAAGCTGA  
CCCTGTCCGAAGTGACCGGACAGGGACTCTGCGTAGGAGCAGTTCCCAAAACCCATCAGGCCCTGTGTAATACCACCCAG  
AAGACGAGCGACGGGTCTACTATCTGGCTGCTCCCGCCGGGACCATTTGGGCTTGCAACACCGGGCTCACTCCCTGCCT  
ATCTACCACTGTGCTCGACCTCACCACCGATTACTGTGTCTGGTTGAGCTCTGGCCAAAGGTGACCTACCACTCCCCTG  
GTTATGTTTTATGGCCAGTTTGAGAGAAAAACCAATATAAAAGAGAGCCGGTGTCAATTAACCTCTGGCCCTGCTGTTGGGA  
GGACTTACTATGGGCGGCATAGCTGCAGGAGTAGGAACCGGGACTACAGCCCTAGTGGCCACCAACAATTGAGCAGCT  
CCAGGCAGCCATACATACAGACCTTGGGGCTTTAGAAAAGTCAGTCAGTGCCCTAGAAAAGTCTCTGACCTCGTTGTCTG  
AGGTGGTCTTACAGAACCGGAGGGGATTAGATCTACTGTTCTTAAAGAAGGAGGATTATGTGCTGCCCTAAAAGAAGAA  
TGCTGTTTTCTACGCGGACCACACTGGCGTAGTAAGAGATAGCATGGCAAAGCTAAGAGAAAGGTTGAACCAGAGACAAAA  
ATTGTTTCAATCAGGACAAGGGTGGTTTGAGGGACTGTTTAACAGGTCCCATGGTTTACGACCTTAATATCCACCATT  
TGGGCCCCCTTGATAATACTTTTATTAATCCTACTCTTCGGACCCCTGTATTCTCAACCGCTTGGTCCAGTTTGTAAAAGAC  
AGAATTTGCGTAGTGACGGCCCTGGTTTGTACCCAACAGTATCACCAACTCAAATCAATAGATCCAGAAGAAGTGGAATC  
ACGTGAATAAAAGATTTTATTTCAGTTTCCAGAAAGAGGGGGGAATGAAAGACCCCACCATCAGGCTTAGCAAGCTAGCTG  
CAGTAACGCCATTTTGAAGGCATGAAAAAGTACCAGAGCTAAGTTCTCAAAAGTTACAAGAAAGTTTCAAGTTAAAGATTA  
ACAGTTAAAGATTAAGGCTGAATAATACCGGGACAGGGGCCAAATATCGGTGGTCAAGCACCTGGGCCCCGGCTCAGGGC  
CAAGAACAGATGGCTCTCAGACGTCACTGTTAGCAGAAGTCTGATGTTTGAAGAAATAGAGGTGCACAGAGCTCT  
GGCCACTCCTTGAACCTGTGTGTCTGCCAATGTTCTGACCAGGTGTGTGCCCATTTGTTGAACCTTCATTAGACCCCTCTCC  
TCGTACCCCTCCCATACCCATTTTCTTGAATAATAGACATTGTTTGAAGTAAAGTCCACCTCAGTTTCCCCAAATGAC  
CGAGAAATACCCCAAGCCTTATTGAACTAACCAACCAGCTCGCTTCTCGCTTCTGTAACCGCGCTTTTTGCTCCCCAGC  
CCCAGCCCTATAAAAAGGGTAAAACTCCACACTCGGCGCGCCAGTCTCCTCCGATAGACTGCGTGCAGCGGGTACCCGTGT  
TCCCAATAAAGCCTCTTGCTGTTTGCATCCGAATCGTGGTCTCGCTGGTCTTGAGAGGGTCTCCTCAGATTGATTGACT  
ACCCACGTGCGGGGTCTTTCA

>Pmv14

TGAAAGACCCCACCATCAGGCTTAGCAAGCTAGCTGCAGTAACGCCATTTTGAAGGCATGAAAAAGTACCAGAGCTGAG  
TTCTCAAAAGTTACAAGAAAGTTTCAAGTTAAAGATTAACAGTTAAAGATTAAGGCTGAATAATACTGGGACAGGGGCCAAA  
TATCGGTGGTCAAGCACCTGGGCCCCGGCTCAGGGCCAAGAACAGATGGCTCTCAGACGTCACTGTTAGCAGAAGTACCT  
TCACTGATTTAAAAAATAGAGGTGCACAGTGTCTGGCCACTCCTTGAACCTGTGTATCTGCCAATGTTCTGACCAGGT  
GTGTGCCCATTGTTAAACCTTCATTAGACCCCTTTCCTCGTACCCCTCCCATACCCATTTCTTAAAAATAGACATTGTTTA  
AACTAAAAAGTCCCACCTCAGTTTCCCCAAATGACCGAGAAATACCCCAAGCCTTATTGAACTAACCAACCAGCTCGC  
TTCTCGCTTCTGTAACCGCGCTTTTTGCTCCCCAGCCCCAGCCCTATAAAAAGGGTAAAACTCCACACTCGGCGCGCCA  
GTCCTCCGATAGACTGCGTGCAGCGGGTACCCGTGTTCCCAATAAAGCCTCTTGCTGTTTGCATCCGAATCGTGGTCTCG  
CTGGTCTTTGAGAGGGTCTCCTCAGATTGATTGACTACCCACGTGCGGGGTCTTTCATTTGGAGGTTCCACCGAGATTG  
GAGACCCCTGCCCAGGGACACCGACCCCCCGCGGGAGGTAAGCTGGCCAGCGGTGTTTTGCTGTCTGTCTCTGTCTT  
CGTGCGTGTGTTGTGCGGCATCCAATGTTTGCAGCTGCGTCTGTACTAGTTAGCTAACTAGATCTGTATCTGGCGGTTCC  
GCGGAAGAAGTACAGAGTTTGTATTTCCGGCCGACGCCCTGGGAGACGTCCAGCGGCCTCGGGGGCCGTTTTGTGGC  
CCATTCTGTATCAGTTAACCTACCCGAGTCGGACTTTTTGGAGCTCCGCCACTGTACGTGGCTTTGTTGGGGGACGAGAG  
ACAGAGACACTTCCCGCCCCCGTCTGAATTTTTGCTTTTGGGTTTTACGCCGAAGCCGCGCGCGCTGTGACTTGTGTTGT  
TGTTCTTTTTGTTCTTCGTTAGTTTTCTTCTGTCTTTAAGTGTTTTGAGATCATGGGACAGACCGTAACCTACCCCTCTGA  
GTTTAACTTGCAGCACTGGGGAGATGTCCAGCGCATTGCATCCAACCAGTCTGTGGATGTGAGGAAGAGGCGCTGGATT  
ACCTTCTGTTCCGCTGAATGGCCAACCTTCAATGTGGGATGGCCTCAGGATGGTACTTTCAATTTAAGTATTATCTCTCA  
GGTTAAGTCTAGAGTGTGTTTGTCTGGTCCCCACGGACACCCAGATCAGGTCCCATATATCGTCACCTGGGAGGCACTTG  
CCTATGACCCCCCTCCGTGGGTCAAACCGTTTGTGTCTCCTAAACTTCTCCTTGGCGACAGCTCCCGTCTCCCGCCC  
GGTCTTCTGCGCAACCTCCGTCCCGATCTGCCCTTTACCCTGCCCTTACCCCTCTATAAAGTCCAAACCTCCTAAGCC  
CCAGGTTCTCCCTGATAGCGGCGGACCCCTCATTGACCTTCTCACAGAGGACCCCCCGCGGTACAGAGCACAAACCTCCT  
CCTCTGCCAGGGAGAACGACGAAGAAGAGGCGGCCACCACCTCCGAGGTTTTCCCCCTTCTCCCATGGTGTCTCGACTG  
CGGGGAAGGAGAGACCTCCCGCAGTGGACTCCACCACCTCCAGGCATTTCCACTCCGCATGGGGGGAGATGGCCAGCT

TCAGTATTGGCCGTTTTCTCTTCGGATTTATACAATTGGAAAAATAATAACCCTTCCTTTTCTGAAGATCCAGGTAAAT  
TGACGGCCTTGATTGAGTCCGTCTCATCACCCACCAGCCCACCTGGGACGACTGTCAGCAGTTGTTGGGGACCCTGCTG  
ACCGGAGAAGAAAAGCAGCGGGTGCTCCTAGAGGCTAGAAAGGCAGTCCGGGGCAATGATGGACGCCCCACTCAGTTGCC  
TAATGAAGTCAATGCTGCTTTTTCCCCTTGAACGCCCCGGTTGGGATTACACCCTACAGAAGGTAGGAACCACCTAGTCC  
TCTATCGCCAGTTGCTCTTAGCGGGTCTCCAGAACGCGGGCAGAAGTCCCACCAATTTGGCCAAGGTAAAAGGGATAACC  
CAGGGACCTAATGAGTCTCCCTCAGCCTTTTTAGAGAGACTCAAAGAGGCCTATCGCAGGTACACTCCTTATGACCCTGA  
GGACCCAGGGCAAGAAACCAATGTGTCTATGTCAATTCATCTGGCAGTCTGCCCCGATATCGGGCGAAAGTTAGAGCGGT  
TAGAAGATTTAAAGAGCAAGACCTTAGGAGACTTAGTGAGGGAAGCTGAAAAGATCTTTAATAAGCGAGAAAACCCCGAA  
GAAAGAGAGGAACGTATCAAGAGAGAAAACAGAGGAAAAAGAAGAACGCCGTAGGGCAGAGGATGAGCAGAGAGAGAAAGA  
AAGGGACCGCAGAAGACATAGAGAGATGAGCAAGCTCTTGGCCACTGTAGTTATTGGTCAGAGACAGGATAGACAGGGGG  
GAGAGCGGAGGAGGCCCCAATTGATAAGGACCAATGCGCCTACTGCAAAGAAAAGGGACACTGGGCTAAGGACTGCCCA  
AAGAAGCCACGAGGGCCCCGAGGACTGAGGCCCCAGACCTCCCTCCTAACCTTAGGTGACTAGGGAGGTCAGGGTCAGGA  
GCCCCCCCCCTGAACCCAGGATAACCCTCAAAGTCGGGGGGCAACCCGTCACCTTCCTGGTAGATACTGGGGCCCCAACCT  
CCGTGCTGACCCAAAATCCTGGACCCCTAAGTGACAAGGCTGCCTGGGTCCAAGGGGCTACTGGAGGAAAGCGGTATCGC  
TGGACCACGGATCGCAAAGTACATCTAGCTACCGGTAAGGTCACCCACTCTTTCCTCCATGTACCAGACTGCCCCATCC  
TCTGCTAGGAAGAGACTTGCTGACTAAACTAAAAGCCCAAATCCACTTCGAGGGATCAGGAGCTCAGGTTATGGGACCAA  
TGGGACTGCCCCCTGCAAGTGCTGACCCTAAACATAGAAGATGAGTATCAGCTACATGAGACCTCAAAGAGCCGGATGTT  
TCTCTAGGGTCCACCTGGCTTTCTGATTTTCCCCAGGTCTGGGCGGAAACCGGGGGCATGGGACTGGCAGTTTCGCCAAGC  
TCCTCTGATCATACCTCTGAAGGCAACCTCTACCCCCGTGTCCATAAAACAATACCCCATGTCCACAAGAAGCCAGACTGG  
GGATCAAGCCCCACATACAGAGACTGTTGGACCAGGGAATACTGGTACCCTGCCAGTCCCCCTGGAACACGCCCCCTGCTA  
CCCGTTAAGAAACCAGGGACTAATGATTATAGGCCTGTCCAGGATCTGAGAGAAAGTCAACAAGCGGGTGGAAGACATCCA  
CCCCACCGTGCCCCAACCTTACAACCTCTTGAGCGGGCTCCCACCGTCCCACCAGTGGTACACTGTGCTTGATTTAAAGG  
ATGCCTTTTTCTGCCTGAGACTCCACCCCACCAGTCAGCCTCTCTTCGCCTTTGAGTGGAGAGATCCAGAGATGGGAATC  
TCAGGACAATTGACCTGGACCAGACTCCCACAGGGTTTCAAAAACAGTCCCACCCTGTTTGATGAGGCACCTGCACAGAGA  
CCTAGCAGACTTCCGGATCCAGCACCCAGACTTGATCCTGCTACAGTACGTGGATGACTTACTGCTGGCCGCCACTTCTG  
AGCTAGACTGCCAACAAGGTACTCGGGCCCTGTTACAAACCTTAGGGAACCTCGGGTATCGGGCCTCGGCCAAGAAAGCC  
CAAATTTGCCAGAAACAGGTCAAGTATCTGGGGTATCTTCTAAAAGAGGGTCAGAGATGGCTGACTGAGGCCAGAAAAGA  
GACTGTGATGGGGCAGCCTACTCCGAAGACCCCTCGACAATAAGGGAGTTTCTAGGGACGGCAGGCTTCTGTGCGCTCT  
GGATCCCTGGGTTTGAGAAATGGCAGCCCCCTTGTAACCTCTCACAAAACGGGGACTCTGTTTAATTGGGGCCAGAC  
CAGCAAAAGGCCTATCAAGAAATCAAACAGGCTCTTCTAACTGCCCCAGCCCTGGGATTGCCAGATTTGACTAAGCCCTT  
TGAACCTTTTGTGACGAGAAGCAGGGCTACGCCAAAGGCGTCCTAACGCAAAAACCTGGGACCTTGGCGTCGGTGGTGG  
CCTACCTGTCCAAAAGCTAGACCCAGTGGCAGCTGGGTGGCCCCCTTGCTACGGATGGTAGCAGCCATTGCCGTTCTG  
ACAAAAGATGCAGGCAAGCTAACCATGGGACAGCCGCTAGTCATCCTGGCCCCCATGCAGTAGAGGCCTAGTCAAGCA  
ACCCCTGACCGCTGGCTATCCAACGCCCGCATGACCCACTATCAGGCGATGCTCCTAGATACGGACCGGGTCCAGTTTCG  
GACCGGTGGTAGCCCTAAACCCGGCTACGTTGCTCCCCCTACCGGGGAAAGAGCCTCACCATGACTGCCTCGAGATCTTG  
GCCGAGACACACGGAACCAGACCAGACCTCACGGACCAGCCCCCTCCAGACGCCGACCACACCTGGTATACAGATGGAAG  
CAGCTTCCTGCAAGAGGGACAACGTAGGGCTGGAGCAGCGGTGACCACCGAGACCGAGGTAATCTGGGCCAAGGCGTTGC  
CAGCCGGGACATCCGCCAGCGAGCTGAACTAATAGCACTCACCCAGGCCCTAAAGATGGCAGAAGGTAAGAAGCTAAAT  
GTTTATACTGATAGCCGCTATGCCTTTGCTACCGCCCATGTCCATAAAAAAATATATAGGAGACGTGGGTTACTCACCTC  
AGAAGGCAAAGAGATCAAGAACAAGGGCGAAATCTTGGCCTTACTGAAAGCTCTCTTTCTGCCCCAAAAGACTCAGTATAA  
TTCCTGCCCAGGACATCAGAAAGGCAATAGTGCTGAAGCTAAAGGCAACCGAATGGCGGACCAGGCAGCCCGGAAGCA  
GCCATGGGGACTGACACAAAGACCTCCTCACTTCTCATAGAGACCTCAACCCCGTACACTCCAGACTTCTTCCATTATAC  
TGAGACAGATATAAAGAACCTACAAGAGTTGGGAGCCACATATGATAGAGAGAAAAAATATTGGGTCTGCAAGGTAAAC  
CTGTGATGCCTGACCAGTTCACCTTTAAATTATTAGACTTCCTTACCAGCTCACCCACCTTAGCTATCAGAAGATGAGG  
GCACTTCTAGACAGAAAAGAAAGCCCCATTATACATGCTAAATAAAGATAAGATCCTCCACGAGGTGGCGGAATCATGCCA  
AGCCTGTGTCCAAGTAAATGCCAGTAAGACTAAGATCAGGGCCGGAACACGAGTAAGAGGACATCGACCAGGCACCCATT  
GGGAAATTGACTTTACTAAAGTGAAGCCCGGACTGTATGGGTACAAGTATCTCCTGGTATTCGTGGACACGTTCTCTGGC  
TGGGTTGAAGCCTTCCCAACCAAACATGAGACTGCCAAAATAGTGACCAAGAAACTTCTGGAAAAAATATTTCCAAGGTT  
TGGAATGCCCCAAGTGTTGGGGACTGATAATGGGCCTGCCTTCGTCTCCAGGTAAGTCAGTCGGTGGCCAAGCTACTGG  
GGATTGATTGAAAACCTACATTGTGCTTACAGACCCAGAGTTCAGGTCAGGTAGAAAGAATGAATAGGACAATCAAGGAG  
ACTTTGACCAAATTAACGCTTGCAACTGGCACTAGAGACTGGGTACTCCTACTTCCCTTAGCCCTCTACCGAGCCCGCAA  
CACTCCAGGCCCCCATGGACTCACTCCGTATGAAATCCTGTATGGGGCGCCCCCGCCCCCTTGTTAATTTCCATGATCCTG  
AAATGTCAAAGTTTACTAATAGCCCCCTCTCTCCAAGCTCACTTACAGGCCCTCCAAGCAGTACAACGAGAGGTCTGGAAG  
CCACTGGCCGCTGCCTATCAGGACCAGCTAGACCAGCCAGTGATACCACACCCCTTCCGTGTGCGCGACACCGTGTGGGT  
ACGCCGGCACCAGACTAAAACTTGGAACCTCGCTGGAAAGGACCCTACACCGTCTGCTGACCACCCCCACCGCTCTCA  
AAGTAGACGGCATCGCTGCGTGGATCCACGCCGCTCACATAAAGCGGCGACAACCCCTCCGGCCGGAACAGCATCAGGA  
CCGACATGGAAGGTCCAGCGTTCTCAAACCCCTTAAAGATAAGATTAACCCGTGGGGCCCCCTAATAGTCCTGGGGATC

TTAATAAGGGCAGGAGTATCAGTACAACATGACAGCCCTCATCAGGTCTTCAATGTTACTTAGAGAGTTACCAACTTAAT  
GACAGGACAAACAGCTAATGCTACCTCCCTCCTGGGGACAATGACCGATGCCTTTCCTAAACTGTACTTTGACTTGTGCG  
ATTTAATAGGGGACGACTGGGATGAGACTGGACTCGGGTGTGCGACTCCCGGGGAAGAAAAAGGGCAAGAACATTTGAC  
TTCTATGTTTGGCCCGGGCATACTGTACCAACAGGGTGTGGAGGGCCGAGAGAGGGCTACTGTGGCAAATGGGGCTGTGA  
GACCACTGGACAGGCATACTGGAAGCCATCATCATCATGGGACCTAATTTCCCTTAAGCGAGGAAACACCCCTCGGAATC  
AGGGCCCCCTGTTATGATTCCCTCAGCGGTCTCCAGTGACATCAAGGGCGCCACACCGGGGGGTGCGATGCAATCCCTTAGTC  
CTGGAATTCAGTGACGCGGGCAAAAAGGCCAGCTGGGATGGCCCCAAAGTATGGGGACTAAGACTGTACCGATCCACAGG  
GACCGACCCGGTGACCCGGTTCTCTTTGACCCGCCAGGTCTCAATATAGGGCCCCGCGTCCCCATTGGGCCTAATCCCG  
TGATCACTGACCAAGTTACCCCCCTCCCGACCCGTGCGAGATCATGCTCCCCAGGCCTCCTCAGCCTCCTCCTCCAGGCGCA  
GCCTCTATAGTCCCTGAGACTGCCCCACCTTCTCAACAACCTGGGACGGGAGACAGGCTGTAAACCTGGTAGATGGAGC  
CTACCAAGCTCTCAACCTCACCAGTCTGACAAAACCCAAGAGTGCTGGTTGTGTCTGGTAGCGGGACCCCCCTACTACG  
AAGGGGTTGCCGTCCTAGGTACTTATTCCAACCATACTCTGCCCCAGCTAACTGTTCCGTGGCCTCCCAACACAAGCTG  
ACCCTGTCCAAAGTGACCGGACAGGGACTCTGCGTAGGAGCAGTTCCCAAACCCATCAGGCCCTGTGTAATACCACCCA  
GAAGACGAGCGACGGGTCTACTATCTGGCTGCTCCCGCCGGGACCATTGTTGGGCTTGCAACACCGGGCTCACTCCCTGCC  
TATCTACCACTGTACTCGACCTCACCACCGATTACTGTGTCTGGTTGAGCTCTGGCCAAAGGTGACCTACCACTCCCT  
GGTTATGTTTATGGCCAGTTTGGAGAGAAAAACCAATATAAAAGAGAGCCGGTGTCAATTAAGTCTGGCCCTGCTGTTGGG  
AGGACTTACTATGGGCGGCATAGCTGCAGGAGTAGGAACCGGGACTACAGCCCTAGTGGCCACCAACAATTGAGCAGC  
TCCAGGCAGCCATACATACAGACCTTGGGGCTTTAAAAAAGTCAGTCAGTGCCCTAGAAAAGTCTCTGACCTCGTTGTCT  
GAGGTGGTCTTACAGAACCGGAGGGGATTAGATCTACTGTTCTTAAAGAAGGAGGTTTATGTGCTGCCCTAAAAGAAGA  
ATGCTGTTTCTACGCAGACCACACTGGCGTAGTAAGAGATAACATGGCAAAGCTAAGAGAAAGGTTGAACCAGAGACAAA  
AATTGTTTGAATCAGGACAAGGGTGGTTTGGAGGACTGTTTAAACAGGTCCCATGTTTACGACCTTAATATCCACCATT  
ATGGGCCCCCTTAATAATACTTTTATTAATCCTACTCTTCGGACCTGTATTCTCAACCGCTTGGTCCAGTTTGTAAAAGA  
CAGAATTTCCGTAGTGCAGGCCCTGGTTTGGACCAACAGTATCACCAACTCAAATCAATAGATCCAGAAAAAGTGAAT  
CACGTGAATAAAAGATTTTATTAGTTTCCAGAAAGAGGGGGGAATGAAAGACCCACCATCAGGCTTAGCAAGCTAGCT  
GCAGTAACGCCATTTTGAAGGCATGAAAAAGTACCAGAGCTGAGTTCTCAAAAGTTACAAGAAAGTTAGTTAAAGATT  
AACAGTTAAAGATTAAGGCTGAATAATACTGGGACAGGGGCCAAATATCGGTGGTCAAGCACCTGGGCCCCGGCTCAGGG  
CCAAGAACAGATGGCTCTCAGACGTAGTGTAGCAGAAGTCTGCTGATTAAAAAATAGAGGTGCACAGTGTCT  
TGGCCACTCCTTGAACCTGTGTATCTGCCAATGTTCTGACCAGGTGTGCCCCATTGTTAAACCTTCATTAGACCTTTTC  
CTCGTACCCCTCCCATACCAATTTCTTAAAAATAGACATTGTTTAAAGTAAAAAGTCCACCTCAGTTTCCCCAAATGA  
CCGAGAAATACCCCAAGCCTTATTGCAACTAACCAACCAGCTCGCTTCTCGCTTCTGTAACCGCGCTTTTTGCTCCCCAG  
CCCCAGCCCTATAAAAAGGGTAAAAACTCCACACTCGGCGCGCCAGTCTCCGATAGACTGCGTGCAGCGGGTACCCGTG  
TTCCCAATAAAGCCTCTTGCTGTTTGCATCCGAATCGTGGTCTCGCTGGTCTTGAGAGGGTCTCCTCAGATTGATTGAC  
TACCCACGTGCGGGGTCTTTCA

>Pmv15

TGAAAGACCCACCATCAGGCTTAGCAAGCTAGCTGCAGTAACGCCATTTTGAAGGCATGAAAAAGTACCAGAGCTGAG  
TTCTCAAAAGTTACAAGAAAGTTAGTTAAAGATTAACAGTTAAAGATTAAGGCTGAATAATACTGGGACAGGGGCCAAA  
TATCGGTGGTCAAGCACCTGGGCCCCGGCTCAGGGCCAAGAACAGATGGCTCTCAGACGTGAGTGTAGCAGAAGTACTGCT  
TCACTGATTTAAAAAATAGAGGTGCACAGTGCTCTGGCCACTCCTTGAACCTGTGTGTCTGCCAATGTTCTGACCAGGT  
GTGTGCCCATTGTTGAACCTTCATTAGACCTTTTCTCGTACCCCTCCCATACCCATTTCTTAAAAATAGACATTGTTTA  
GAACTAAAAAGTCCCACCTCAGTTTCCCCAAATGACCGAGAAATACCCCAAGCCTTATTGCAACTAACCAACCAGCTCGC  
TTCTCGCTTCTGTAACCGCGCTTTTTGCTCCCCAGCCCCAGCCCTATAAAAAGGGTAAAAACTCCACACTCGGCGCGCCA  
GTCCTCCGATAGACTGCGTGCAGCGGGTACCCGTGTTCCCAATAAAGCCTCTTGCTGTTTGCATCCGAATCGTGGTCTCG  
CTGGTCTTTGAGAGGGTCTCCTCAGATTGATTGACTACCCACGTGCGGGGTCTTTCAATTTGGAGGTTCCACCGAGATTG  
GAGACCCCTGCCCAGGGACACCGACCCCCCGCCGGGAGGTAAGCTGGCCAGCGGTGTTTTCTGTGTCTGTCTCTGTCTTC  
GTGCGTGTGTTGTGCCGGCATCAATGTTTGCCTGCTGTACTAGTTAGCTAACTAGATCTGTATCTGGCGGTTCCG  
CGGAAGACTGACGAGTTCTGATTTCCCGCCGACCCCTGGGAGACGTCCCAGCGGCCTCGGGGCCCCGTTTTGTGGCC  
CATTCTGTATCAGTTAACTACCCGAGTCGGACTTTTTGGAGCTCCGCCACTGTACGTGGCTTTGTTGGGGGACGAGAGA  
CAGAGACACTTCCCGCCCCCGTCTGAATTTTTGCTTTTCGGTTTTACGCCGAAGCCGCGCCGCGCTGTGACTTGTTTTGTT  
GTTCTTTTGTCTTCTGTTAGTTTTCTTCTGTCTTTAAGTGTTTTTCGAGATCATGGGACAGACCGTAAGTACCCCTCTGAG  
TTTAACCTTGCAGCACTGGGGAGATGTCCAGCGCATTGCATCCAACAGTCTGTGGATGTCAGGAAGAGGCGCTGGATTA  
CCTTCTGTTCCGCTGAATGGCCAACCTTTCAATGTGGGATGGCCTCAGGATGGTACTTTCAATTTAAGTATTATCTCTCAG  
GTTAAGTCTAGAGTGTTTTGTCTGGTCCCCACGGACACCCGGATCAGGTCCCATATATCGTCACCTGGGAGGCACCTTGC  
CTATGACCCCCCTCCGTGGGTCAAACCGTTTTGTGTCTCTTAAACTTCTCCTCCCTTGCCGACAGCTCCCGTCTCCCGCCCC  
GTCCTTCTGCGCAACCTCCGTCCCGATCTGCCCTTTACCCTGCCCTTACCCCTCTATAAAGTCCAAACCTCCTAAGCCC  
CAGGTTCTCCCTGATAGCGGCGGACCCCTCATTGACCTTCTCACAGAGGACCCCCCGCGTACAGAGCACAACCTCCTC  
CTCTGCCAGGGAGAACGACGAAGAAGAGGCGGCCACCACCTCCGAGGTTTTCCCCCTTCTCCCATGGTGTCTCGACTGC  
GGGGAAGGAGAGACCTCCCGCAGTGGACTCCACCACCTCCAGGCATTTCCACTCCGCATGGGGGGAGATGGCCAGCTT

CAGTATTGGCCGTTTTCTCTTCGGATTTATACAATTGGAAAAATAATAACCCCTTCCTTTTTCTGAAGATCCAGGTAAATT  
GACGGCCTTGATTGAGTCCGTCTCATCACCCACCAGCCACCTGGGACGACTGTCAGCAGTTGTTGGGGACCCTGCTGA  
CCGGAGAAGAAAAGCAGCGGGTGCTCCTAGAGGCTAGAAAGGCAGTCCGGGGCAATGATGGACGCCCCACTCAGTTGCCT  
AATAAAGTCAATGCTGCTTTTTCCCTTTGAACGCCCCGGTTGGGATTACACCACTACAGAAGGTAGGAACCACCTAGTCCT  
CTATCGCCAGTTGCTCTTAGCGGGTCTCCAGAACGCGGGCAGAAGTCCCACCAATTTGGCCAAGGTAAAAGGGATAACCC  
AGGGACCTAATGAGTCTCCCTCAGCCTTTTTAGAGAGACTCAAAGAGGCCTATCGCAGGTACACTCCTTATGACCCTGAG  
GACCCAGGGCAAGAAACCAATGTGTCTATGTCAATTCATCTGGCAGTCTGCCCCGATATCGGGCGAAAGTTAGAGCGGTT  
AGAAGATTTAAAGAGCAAGACCTTAGGAGACTTAGTGAGGGAAGCTGAAAAGATCTTTAATAAGCGAGAAACCCCGGAAG  
AAAGAGAGGAACGTATCAAGAGAGAAATAGAGGAAAAAGAAGAACGCCGTAGGGCAGAGGATGAGCAGAGAGAGAAAGAA  
AGGGACCGCAGACATAGAGAGATGAGCAAGCTCTTGCCACTGTAGTTATTGGTCAGAGACAGGATAGACAGGGGGG  
AGAGCGGAGGAGGCCCACTTGATAAGGACCAATGCGCCTACTGCAAAGAAAAGGGACACTGGGCTAAGGACTGCCCAA  
AGAAGCCACGAGGGCCCCGAGGACTGAGGCCCCAGACCTCCCTCCTAACCTTAGGTGACTAGGGAGGTGAGGGTCAGGAG  
CCCCCCCCCTGAACCCAGGATAACCCCTCAAAGTCGGGGGGCAACCCGTACCTTCCTGGTAGATACTGGGGCCCCAACACTC  
CGTGCTGACCCAAAATCCTGGACCCCTAAGTGACAAGGCTGCCTGGGTCCAAGGGGCTACTGGAAGAAAGCGGTATCGCT  
GGACCACGGATCGCAAAGTACATCTAGCTACCGGTAAGGTCACCCACTCTTTCCTCCATGTACCAGACTGCCCCCTATCCT  
CTGCTAGGAAGAGACTTGCTGACTAACTAAAAGCCCCAAATCCACTTCGAGGGATCAGGAGCTCAGGTTATGGGACCAAT  
GGGACTGCCCCTGCAAGTGCTGACCCTAAACATAGAAGATGAGTATCGGCTACATGAGACCTCAAAGAGCCGGATGTTT  
CTCTAGGGTCCACCTGGCTTTCTGATTTTCCCCAGGTCTGGGCGGAAACCGGGGGCATGGGACTGGCAGTTTCGCCAAGCT  
CCTCTGATCATACCTCTGAAGGCAACCTCTACCCCCGTGTCCATAAAACAATACCCCATGTCAACAAGGCCAGACTGGG  
GATCAAGCCCCACATACAGAGACTGTTGGACCAGGGAATACTGGTACCCTGCCAGTCCCCCTGGAACACGCCCCCTGCTAC  
CCGTTAAGAAACCAGGGACTAATGATTATAGGCCTGTCCAGGATCTGAGAGAAGTCAACAAGCGGGTGGAAGACATCCAC  
CCCACCGTGCCCAACCCTTACAACCTCTTGAGCGGGCTCCCACCGTCCCACCAGTGGTACACTGTGCTTGATTTAAAGGA  
TGCCTTTTTCTGCCTGAGACTCCACCCACCAGTCAGCCTCTCTTCGCCTTTGAGTGGAGAGATCCAGAGATGGGAATCT  
CAGGACAATTGACCTGGACCAGACTCCCACAGGGTTTCAAAAACAGTCCCACCCTGTTTGATGAGGCACTGCACAGAGAC  
CTAGCAGACTTCCGGATCCAGCACCCAGACTTGATCCTGCTACAGTACGTGGATGACTTACTGCTGGCCGCCACTTCTGA  
GCTAGACTGCCAACAAAGGTACTCGGGCCCTGTTACAAACCCTAGAGAACCTCGGGTATCGGGCCTCGGCCAAGAAAGCCC  
AAATTGCGCAAGAACAGGTCAAGTATCTGGGGTATCTTTAAAGAGGGTCAGAGATGGCTGACTGAGGCGAGAAAGAG  
ACTGTGATGGGGCAGCCTACTCCGAAGACCCCTCGACAACCTAAGGGAGTTCTTAGGGACCGCAGGCTTCTGTGCGCTCTG  
GATCCCTGGGTTTGCAGAAATGGCAGCCCCCTTGTAACCTCTCACAAAACGGGGACTCTGTTTAATTGGGGCCCCAGACC  
AGCAAAAGGCCTATCAAGAAATCAAACAGGCTCTTCTAACTGCCCCAGCCCTGGGATTGCCAGATTTGACTAAGCCCTTT  
GAACTCTTTGTGCGACGAGAAGCAGGGCTACGCCAAAGGCGTCCTAACGCAAAAACCTGGGACCTTGGCGTCGGCCGGTGGC  
CTACCTGTCCAAAAGCTAGACCCAGTGGCAGCTGGGTGGCCCCCTTGCCCTACGGATGGTAGCAGCCATTGCCGTTCTGA  
CAAAAGATGCAGGCAAGCTAACCATGGGACAGCCGCTAGTCATCCTGGCCCCCATGCAGTAGAGGCACTAGTCAAGCAA  
CCCCCTGACCGCTGGCTATCCAACGCCCCGCATGACCCACTATCAGGCGATGCTCCTAGATACGGACCGGGTCCAGTTCTGG  
ACCGGTGGTAGCCCTAAACCCGGCTACGTTGCTCCCCCTACCGGGGAAAGAGCCTCACCATGACTGCCTCGAGATCTTGG  
CCGAGACACACGGAACCAGACCAGACCTCACGGACCAGCCCCCTCCAGACGCCGACCACACCTGGTATACAGATGAAAGC  
AGCTTCCTGCAAGAGGGACAACGTAGGGCTGGAGCAGCGGTGACCACCGAGACCGAGGTAATCTGGGCCAAGGCGTTGCC  
AGCCGGGACATCCGCCCAGCGAGCTGAACTAATAGCACTCACCCAGGCCCTAAAGATGGCAGAAGGTAAGAAGCTAAATG  
TTTATACTGATAGCCGCTATGCCTTTGCTACCGCCCATGTCCATGGAGAAATATATAGGAGACGTGGGTTGCTCACCTCA  
GAAGGCAAGGAGATCAAGAACAAAGGGCGAAATCTTAGCCTTACTAAAAGCTCTCTTTCTGCCCCAAAGACTCAGTATAAT  
TCACTGCCCAGGACATCAGAAAGGCAATAGTGCTGAAGCTAAAGGCAACCGAATGGCGGACCAGGCAGCCCGGGAAGCAG  
CCATGGGGACTGACACAAAGACCTCCTCACTTCTCATAGAGACCTCAACCCCGTACACTCCAGACTTCTTCCATTATACT  
GAGACAGATATAAAGAACCTACAAGAGTTGGGAGCCACATATGATAGAGAAAAAATATTGGGTCTGCAAGGTAAACC  
TGTGATGCCTGACCAGTTCACCTTTAAATTATTAGACTTCCTTACCAGCTCACCCACCTTAGCTATCAGAAGATGAGGG  
CACTTCTAGACAGGAAAGAAAGCCCTATTACATGCTAAATAAAGATAAGATCCTCCACGAGGTGGCGGAATCATGCCAA  
GCCTGTGTCCAAGTAAATGCCAGTAAGACTAAGATCAGGGCCGGAACACAGAGTAAGAGGACATCGACCAGGCACCCATTG  
GGAAATTGACTTTACTGAAGTGAAGCCCGGACTGTATGGGTACAAGTATCTCCTGGTATTCTGTTGACACGTTCTCTGGCT  
GGGTTGAAGCCTTCCCAACCAAACATGAGACTGCCAAAATAGTGACCAAGAAACTTCTGGAAGAAATATTTCCAAGGTTT  
GGAATGCCCCAAGTGTTGGGGACTGATAATGGGCCTGCCTTCGTCTCCCAGGTAAGTCAGTCGGTGGCCAAGCTACTGGG  
GATTGATTGGAACTACATTGTGCTTACAGACCCCAGAGTTCAGGTGAGGTAGAAAGAATGAATAGGACAATCAAGGAGA  
CTTTGACCAAATTAACGCTTGCAACTGGCACTAGAGACTGGGTACTCCTACTTCCCTTAGCCCTCTACCGAGCCCCGCAAC  
ACTCCGGGCCCCCATGGACTCACTCCGTATGAAATCCTGTATGGGGCGCCCCCGCCCCCTTGTTAATTTCCATGATCCTGA  
AATGTCAAAGTTTACTAATAGCCCTCTCTCCAAGCTCACTTACAGGCCCTCCAAGCAGTACAACGAGAGGTCTGGAAGC  
CACTGGCCGCTGCCTATCAGGACCAGCTGGACCAGCCAGTGATAACACACCCCTTCCGTGTGCGGACACCGTGTGGGT  
CGCCGGCACCAGACTAAGAATTGGAACCTCGCTGGAAAGGACCCTACACCGTCTGCTGACCACCCCCACCGCTCTCAA  
AGTAGACGGCATCGCTGCGTGGATCCACGCCGCTCACGTAAAAGCGGCGACAACCCCTCCGGCCGGAACAGCATCAGGAC  
CGACATAGAAGGTCCAGCGTTCTCAAACCCCTTAAAGATAAGATTAACCCGTGGGGCCCCCTAATAGTCCTGGGGATCT

TAATAAGGGCAGGAGTATCAGTACAACATGACAGCCCTCATCAGGTCTTCAATGTTACTTGGAGAGTTACCAACTTAATG  
ACAGGACAAACAGCTAATGCTACCTCCCTCCTGGGGACAATGACCGATGCCTTTCTTAACTGTACTTTGACTTGTGCGA  
TTTAATAGGGGACGACTGGGATGAGACTGGACTCGGGTGTGCGACTCCCGGGGAAGAAAAAGGGCAAGAACATTTGACT  
TCTATGTTTTGCCCCGGGCATACTGTACCAACAGGGTGTGGAGGGCCGAGAGAGGGCTACTGTGGCAAATGGGGCTGTGAG  
ACCACTGGACAGGCATACTGGAAGCCATCATCATCATGGGACCTAATTTCCCTTAAGCGAGGAAACACCCCTCGGAATCA  
GGGCCCCCTGTTATGATTCTCAGCGGTCTCCAGTGACATCAAGGGCGCCACACCGGGGGTTCGATGCAATCCCCTAGTCC  
TGGAATTCAGTGACGCGGGCAAAAAGGCCAGCTGGGATGGCCCCAAAGTATGGGGACTAAGACTGTACCGATCCACAGGG  
ACCGACCCGGTGACCCGGTTCTCTTTGACCCGCCAGGTCTCAATATAGGGCCCCGCGTCCCCATTGGGCCTAATCCCGT  
GATCACTGACCAGTTACCCCCCTCCCGACCCGTGCAGATCATGCTCCCCAGGCCTCCTCAGCCTCCTCCTCCAGGCGCAG  
CCTCTATAGTCCCTGAGACTGCCACCTTCTCAACAACCTGGGACGGGAGACAGGCTGCTAAACCTGGTAGATGGAGCC  
TACCAAGCTCTCAACCTCACCAGTCTTGACAAAACCAAGAGTGTGGTTGTGTCTGGTAGCGGGACCCCCCTACTACGA  
AGGGGTTGCCGTCTAGGTACTTATTCCAACCATACCTCTGCCCCAGCTAACTGCTCCGTGGCCTCCCAACACAAGCTGA  
CCCTGTCCGAAGTGACCGGACAGGGACTCTGCGTAGGAGCAGTTCCCAAAACCCATCAGGCCCTGTGTAATACCACCCAG  
AAGACGAGCAACGGGTCTACTATCTGGCTGCTCCCGCCGGGACCATTTGGGCTTGCAACACCGGGCTCACTCCCTGCCT  
ATCTACCACTGTACTCGACCTCACCACCGATTACTGTGTCTGGTTGAGCTCTGGCCAAAGGTGACCTACCACTCCCCTG  
GTTATGTTTTATGGCCAGTTTGAGAGAAAAACCAGATATAAAAGAGAGCCGGTGTCAATTAACCTCTGGCCCTGCTGTTGGGA  
GGACTTACTATGGGCGGCATAGCTGCAGGAGTAGGAACCGGGACTACAGCCCTAGTGGCCACCAACAATTCGAGCAGCT  
CCAGGCAGCCATACATACAGACCTTGGGGCTTTAAAAAAGTCAGTCAGTGCCCTAAAAAAGTCTCTGACCTCGTTGTCTG  
AGGTGGTCTTACAGAACCGGAGGGGATTAGATCTACTGTTCTTAAAGAAGGAGGATTATGTGCTGCCCTAAAAGAAGAA  
TGCTGTTTTCTACGCGGACCACACTGGCGTAGTAAGAGATAGCATGGCAAAGCTAAGAGAAAGGTTGAACCAGAGACAAAA  
ATTGTTCAAATCAGGACAAGGGTGGTTTGAGGGACTGTTTAACAGGTCCCATGGTTCACGACCTTAATATCCACCATTA  
TGGGCCCCCTTGATAATACTTTTATTAATCCTACTCTTCGGACCCCTGTATTCTCAACCGCTTGGTCCAGTTTGTAAAAGAC  
AGAATTTCCGGTAGTGCAGGCCCTAGTTTGTACCCAACAGTATCACCAACTCAAATCAATAGATCCAGAAGAAGTGGAATC  
ACGTGAATAAAAGATTTTATTTCAGTTTCCAGAAAGAGGGGGGAATGAAAGACCCCACCATCAGGCTTAGCAAGCTAGCTG  
CAGTAACGCCATTTTGAAGGCATGAAAAAGTACCAGAGCTGAGTTCTCAAAAGTTACAAGAAAGTTTCAAGTTAAAGATTA  
ACAGTTAAAGATTAAAGGCTGAATAATACTGGGACAGGGGCCAAATATCGGTGGTCAAGCACCTGGGCCCCGGCTCAGGGC  
CAAGAACAGATGGCTCTCAGACGTCACTGTAGCAGAACTAGCTTCACTGATTTAAAAAATAGAGGTGCACAGTGTCT  
GGCCACTCCTTGAACCTGTGTGTCTGCCAATGTTCTGACCAGGTGTGTGCCCATTTGTTGAACCTTCATTAGACCCCTTCC  
TCGTACCCCTCCCATACCCATTTTCTTAAAAATAGACATTGTTTGAAGTAAAAAGTCCACCTCAGTTTCCCCAAATGAC  
CGAGAAATACCCCAAGCCTTATTGAACTAACCAACCAGCTCGCTTCTCGCTTCTGTAACCGCGCTTTTTGCTCCCCAGC  
CCCAGCCCTATAAAAAGGGTAAAAACTCCACACTCGGCGCGCCAGTCTCCGATAGACTGCGTGCAGCGGGTACCCGTGT  
TCCCAATAAAGCCTCTTGCTGTTTGCATCCGAATCGTGGTCTCGCTGGTCTTGAGAGGGTCTCCTCAGATTGATTGACT  
ACCCACGTGCGGGGTCTTTCA

>Pmv16

TGAAAGACCCCACCATCAGGCTTAGCAAGCTAGCTGCAGTAACGCCATTTTGAAGGCATGAAAAAGTACCAGAGCTGAG  
TTCTCAAAAGTTACAAGAAAGTTTCAAGTTAAAGATTAACAGTTAAAGATTAAGGCTGAATAATACTGGGACAGGGGCCAAA  
TATCGGTGGTCAAGCACCTGGGCCCCGGCTCAGGGCCAAGAACAGATGGCTCTCAGACGTCACTGTTAGCAGAACTAGCT  
TCACTGATTTAGAAAAATAGAGGTGCACAGTGTCTGGCCACTCCTTGAACCTGTGTGTCTGCCAATGTTCTGACCAGGT  
GTGTGCCCATTGTTGAACCTTCATTAGACCCCTTTCCTCGTACCCCTCCCATACCCATTTCTTGAATAAGACATTGTTTA  
GAACTAAAAAGTCCCACCTCAGTTTCCCCAAATGACCGAGAAATACCCCAAGCCTTATTGAACTAACCAACCAGCTCGC  
TTCTCGCTTCTGTAACCGCGCTTTTTGCTCCCCAGCCCCAGCCCTATAAAAAGGGTAAAAACTCCACACTCGGCGCGCCA  
GTCCTCCGATAGACTGCGTGCAGCGGGTACCCGTGTTCTCAATAAAGCCTCTTGCTGTTTGCATCCGAATCGTGGTCTCG  
CTGGTCTTTGAGAGGGTCTCCTCAGATTGATTGACTACCCACGTGCGGGGTCTTTCATTTGGAGGTCCCACCGAGATTG  
GAGACCCCTGCCAGGGACACCGACCCCCCGCGGGAGGTAAGCTGGCCAGCGGTGTTTTCTGTGTCTGTCTCTGTCTTC  
GTGCGTGTGTTGTGCCGGCATCAATGTTTGCCTGTGTCTGTACTAGTTAGCTAACTAGATCTGTATCTGGCGGTTCCG  
CGAAGAAGTACGAGTTTCTGATTTCCCGGCCGAGCCCTGGGAGACGTCCCAGCGGCCTCGGGGCCCGTTTTGTGGCC  
CATTCTGTATCAGTTAACCTACCCGAGTCGGACTTTTTGGAGCTCCGCCACTGTACGTGGCTTTGTTGGGGACGAGAGA  
CAGAGACACTTCCCGCCCCCGTCTGAATTTTTGCTTTTCGGTTTTACGCCGAAGCCGCGCGCGTCTGATTTGTTTGT  
GTTCTTTTGTCTTCTGTTAGTTTTCTTCTGTCTTTAAGTGTTTTTCGAGATCATGGGACAGACCGTAACCTACCCCTCTGAG  
TTTAACCTTGCAGCACTGGGGAGATGTCCAGCGCATTGCATCCAACAGTCTGTGGATGTCAAGAAGAGGCGCTAGATTA  
CCTTCTGTTCCGCTGAATGGCCAACCTTTCAATGTGGGATGGCCTCAGGATGGTACTTTCAATTTAAGTATTATCTCTCAG  
GTTAAGTCTAGAGTGTGTTTGTCTGGTCCCCACGGACACCCGGATCAGGTCCCATATATCGTCACCTGGGAGGCACCTTGC  
CTATGACCCCCCTCCGTGGGTCAAACCGTTTTGTGTCTCTTAACTTCTCCTCCCTTGCCGACAGCTCCCGTCTCCCGCCCC  
GTCCTTCTGCGCAACCTCCGTCCCGATCTGCCCTTTACCCTGCCCTTACCCCTCTATAAAGTCCAAACCTCCTAAGCCC  
CAGGTTCTCCCTGATAGCGGCGGACCCCTCATTGACCTTCTCACAGAGGACCCCCCGCGTACAGAGCACAACCTCCTC  
CTCTGCCAGGGAGAACGACGAAGAAGAGGCGGCCACCACCTCCGAGGTTTTCCCCCTTCTCCCATGGTGTCTCGACTGC  
GGGGAAGGAGAGACCCCTCCCGCAGTGGACTCCACCACCTCCAGGCATTTCCACTCCGCATGGGGGGAGATGGCCAGCTT

CAGTATTGGCCGTTTTCTCTTCGGATTTATACAATTGGAAAAATAATAACCCCTTCCTTTTTCTGAAGATCCAGGTAAATT  
GACGGCCTTGATTGAGTCCGTCTCATCACCCACCAGCCACCTGGGACGACTGTCAGCAGTTGTTGGGGACCCTGCTGA  
CCGGAGAAGAAAAGCAGCGGGTGCTCCTAGAGGCTAGAAAGGCAGTCCGGGGCAATGATGGACGCCCCACTCAGTTGCCT  
AATGAAGTCAATGCTGCTTTTTCCCTTTGAACGCCCCGGTTGGGATTACACCACTACAGAAGGTAGGAACCACCTAGTCCT  
CTATCGCCAGTTGCTCTTAGCGGGTCTCCAGAACGCGGGCAGAAGTCCCACCAATTTGGCCAAGGTAAAAGGGATAACCC  
AGGGACCTAATGAGTCTCCCTCAGCCTTTTTAGAGAGACTCAAAGAGGCCTATCGCAGGTACACTCCTTATGACCCTGAG  
GACCCAGGGCAAGAAACCAATGTGTCTATGTCAATTCATCTGGCAGTCTGCCCCGATATCGGGCGAAAGTTAGAGCGGTT  
AGAAGATTTAAAGAGCAAGACCTTAGGAGACTTAGTGAGGGAAGCTGAAAAGATCTTTAATAAGCGAGAAACCCCGGAAG  
AAAGAGAGGAACGTATCAAGAGAGAAACAGAGGAAAAAGAAGAACGCCGTAGGGCAGAGGATGAGCAGAGAGAGAAAGAA  
AGGGACCGCAGAACATAGAGAGATGAGCAAGCTCTTGCCACTGTAGTTATTGGTCAGAGACAGGATAGACAGGGGGG  
AGAGCGGAGGAGGCCCACTTGATAAGGACCAATGCGCCTACTGCAAAAAAAGGGACACTGGGCTAAGGACTGCCCAA  
AGAAGCCACGAGGGCCCCGAGGACTGAGGCCCCAGACCTCCCTCCTAACCTTAGGTGACTAGGGAGGTGAGGGTCAGGAG  
CCCCCCCCCTGAACCCAGGATAACCCCTCAAAGTCGGGGGGCAACCCGTACCTTCTGGTAGATACTGGGGCCCCAACACTC  
CGTGCTGACCCAAAATCCTGGACCCCTAAGTGACAAGGCTGCCTGGGTCCAAGGGGCTACTGGAGGAAAGCGGTATCGCT  
GGACCACGGATCGCAAAGTACATCTAGCTACCGGTAAGGTCACCCACTCTTTCCTCCATGTACCAGACTGCCCCCTATCCT  
CTGCTAGGAAGAGACTTGCTGACTAACTAAAAGCCCCAAATCCACTTCGAGGGATCAGGAGCTCAGGTTATGGGACCAAT  
GGGACTGCCCCTGCAAGTGCTGACCCTAAACATAGAAGATGAGTATCGGCTACATGAGACCTCAAAGAGCCGGATGTTT  
CTCTAGGGTCCACCTGGCTTTCTGATTTTCCCCAGGTCTGGGCGGAAACCGGGGGCATGGGACTGGCAGTTTCGCCAAGCT  
CCTCTGATCATACCTCTGAAGGCAACCTCTACCCCCGTGTCCATAAAACAATACCCCATGTACAAGAAGCCAGACTGGG  
GATCAAGCCCCACATACAGAGACTGTTGGACCAGGGAATACTGGTACCCTGCCAGTCCCCCTGGAACACGCCCCCTGCTAC  
CCGTTAAGAAACCAGGGACTAATGATTATAGGCCTGTCCAGGATCTGAGAGAAGTCAACAAGCGGGTGGAAGACATCCAC  
CCCACCGTGCCCAACCCTTACAACCTCTTGAGCGGGCTCCCACCGTCCCACCAGTGGTACACTGTGCTTGATTTAAAGGA  
TGCCTTTTTCTGCCTGAGACTCCACCCACCAGCCAGCCTCTCTTCGCCTTTGAGTGGAGAGATCCAGAGATGGGAATCT  
CAGGACAATTGACCTGGACCAGACTCCCACAGGGTTTCAAAAACAGTCCCACCCTGTTTGATGAGGCACTGCACAGAGAC  
CTAGCAGACTTCCGGATCCAGCACCCAGACTTGATCCTGCTACAGTACGTGGATGACTTACTGCTGGCCGCCACTTCTGA  
GCTCGACTGCCAACAAAGGTACTCGGGCCCTGTTACAAACCCTAGGGAACCTCGGGTATCGGGCCTCAGCCAAGAAAGCCC  
AAATTGCGCAAGAACAGGTCAAGTATCTGGGGTATCTTTAAAGAGGGTCAGAGATGGCTGACTGAGGCCAGAAAGAG  
ACTGTGATGGGGCAGCCTACTCCGAAGACCCCTCGACAACCTAAGGGAGTTCTCAGGGACCGCAGGCTTCTGTGCCTCTG  
GATCCCTGGGTTTGCAGAAATGGCAGCCCCCTTGTAACCTCTCACAAAACGGGGACTCTGTTTAATTGGGGCCCAGACC  
AGCAAAAGGCCTATCAAGAAATCAAACAGGCTCTTCTAACTGCCCCAGCCCTGGGATTGCCAGATTTGACTAAGCCCTTT  
GAACTCTTTGTTGACGAGAAGCAGGGCTACGCCAAAGGCGTCTTAACGCAAAAACCTGGGACCTTGGCGTCGGCCGGTGGC  
CTACCTGTCCAAAAGCTAGACCCAGTGGCAGCTGGGTGGCCCCCTTGCTTACGGATGGTAGCAGCCATTGCCGTTCTGA  
CAAAAGATGCAGGCAAGCTAACCATGGGACAGCCGCTAGTCATCCTGGCCCCCATGCAGTAGAGGCACTAGTCAAGCAA  
CCCCCTGACCGCTGGCTATCCAACGCCCCGCATGACCCACTATCAGGCGATGCTCCTAGATACGGACCGGGTCCAGTTCTGG  
ACCGGTGGTAGCCCTAAACCCGGCTACGTTGCTCCCCCTACCGGGGAAAGAGCCTCACCATGACTGCCTCGAGATCTTGG  
CCGAGACACACGGAACCAGACCAGACCTCACGGACCAGCCCCCTCCAGACGCCGACCACACCTGGTATACAGATGGAAGC  
AGCTTCTGCAAGAGGGACAACGTAGGGCTGGAGCAGCGGTGACCACCGAGACCGAGGTAATCTGGGCCAAGGCGTTGCC  
AGCCGGGACATCCGCCCAGCGAGCTGAACCTAATAGCACTCACCCAGGCCCTAAAGATGGCAGAAGGTAAGAAGCTAAATG  
TTTATACTGATAGCCGCTATGCCTTTGCTACCGCCCATATCCATGGAGAAATATATAGGAGACGTGGGTTGCTCACCTCA  
GAAGGCAAGGAGATCAAGAACAAGGGCGAAATCTTGGCCTTACTGAAAGCTCTCTTTCTGCCCCAAAGACTCAGTATAAT  
TCACTGCCCAGGACATCAGAAAGGCAATAGTGCTGAAGCTAAAGGCAACCGAATGGCGGACCAGGCAGCCCGGGAAGCGG  
CCATGGGGACTGACACAAAGGCCTCCTCACTTCTCATAGAGACCTCAACCCCGTACACTCCAGACTTCTTCCATTATACT  
GAGACAGATATAAAGAACCTACAAGAGTTGGGAGCCACATATGATAGAGAGAAAAAATATTGGGTCTGCAAGGTAAACC  
TGTGATGCCTGACCAGTTCACCTTTAAATTATTAGACTTCCTTACCAGCTCACCCACCTTAGCTATCAGAAGATGAGGG  
CACTTCTAGACAGGAAAGAAAGCCCCCTATTACATGCTAAATAAAGATAAGATCCTCCACGAGGTGGCGGAATCATGCCAA  
GCCTGTGTCCAAGTAAATGCCAGTAAGACTAAGATCAGGGCCGGAACACAGAGTAAGAGGACATCGACCAGGCACCCATTG  
GGAAATTGACTTTTACTGAAGTGAAGCCCGGACTGTATGGGTACAAGTATCTCCTGGTATTCTGTTGACACGTTCTCTGGCT  
GGGTTGAAGCCTTCCCAACCAACATGAGACTGCCAAAATAGTGACCAAGAAACTTCTGGAAGAAATATTTCCAAGGTTT  
GGAATGCCCCAAGTGTTGGGGACTGATAATGGGCCTGCCTTCGTCTCCCAGGTAAGTCAGTCGGTGGCCAAGCTACTGGG  
GATTGATTGGAACTACATTGTGCTTACAGACCCCAGAGTTCAGGTGAGGTAGAAAGAATGAATAGGACAATCAAGGAGA  
CTTTGACCAAATTAACGCTTGCAACTGGCACTAGAGACTGGGTACTCCTACTTCCCTTAGCCCTCTACCGAGCCCCGCAAC  
ACTCCGGGCCCCCATGGACTCACTCCGTATGAAATCCTGTATGGGGCGCCCCCGCCCCCTTGTTAATTTCCATGATCCTGA  
AATGTCAAAGTTTACTAATAGCCCCCTCTCTCCAAGCTCACTTACAGGCCCTCCAAGCAGTACAACGAGAGGTCTGGAAGC  
CACTGGCCGCTGCCTATCAGGACCAGCTGGACCAGCCAGTGATAACACACCCCTTCCGTGTGCGGACACCGTGTGGGTA  
CGCCGGCACCAGACTAAGAATTGGAACCTCGCTGGAAAGGACCCTACACCGTCTGCTGACCACCCCCACCGCTCTCAA  
AGTAGACGGCATCGCTGCGTGGATCCACGCCGCTCACGTAAAAGCGGCGACAACCCCTCCGGCCGGAACAGCATCAGGAC  
CGACATGGAAGGTCCAGCGTTCTCAAACCCCTTAAAGATAAGATTAACCCGTGGGGCCCCCTAATAATCCTGGGGATCT

TAATAAGAGCAGGAGTATCAGTACAACATGACAGCCCTCATCAGGTCTTCAATGTTACTTGGAGAGTTACCAACTTAATG  
ACAGGACAAACAGCTAATGCTACCTCCCTCCTGGGGACAATGACCGATGCCTTTCTTAACTGTACTTTGACTTGTGCGA  
TTTAATAGGGGACGACTGGGATGAGACTGGACTCGGGTGTGCGACTCCCGGGGGAAGAAAAAGGGCAAGAACATTTGACT  
TCTATGTTTTGCCCCGGGCATACTGTACCAACAGGGTGTGGAGGGCCGAGAGAGGGCTACTGTGGCAAATGGGGCTGTGAG  
ACCACTGGACAGGCATACTGGAAGCCATCATCATCATGGGACCTAATTTCCCTTAAGCGAGGAAACACCCCTCGGAATCA  
GGGCCCCCTGTTATGATTCTCAGCGGTCTCCAGTGACATCAAGGGCGCCACACCGGGGGGTGATGCAATCCCCTAGTCC  
TGGAATTCAGTGACGCGGGCAAAAAGGCCAGCTGGGATGGCCCCAAAGTATGGGGACTAAGACTGTACCGATCCACAGGG  
ACCGACCCGGTGACCCGGTTCTCTTTGACCCGCCAGGTCTCAATATAGGGCCCCGCGTCCCCATTGGGCCTAATCCCGT  
GATCACTGACCAGTTACCCCCCTCCCGACCCGTGCAGATCATGCTCCCCAGGCCTCCTCAGCCTCCTCCTCCAGGCGCAG  
CCTCTATAGTCCCTGAGACTGCCACCTTCTCAACAACCTGGGACGGGAGACAGGCTGTCTAAACCTGGTAGATGGAGCC  
TACCAAGCTCTCAACCTCACCAGTCTTGACAAAACCAAGAGTGTGGTTGTGTCTGGTAGCGGGACCCCCCTACTACGA  
AGGGGTTGCCGTCTAGGTACTTATTCCAACCATACTCTGCCCCAGCTAACTGCTCCGTGGCCTCCCAACACAAGCTGA  
CCCTGTCCGAAGTGACCGGACAGGGACTCTGCGTAGGAGCAGTTCCCAAAACCCATCAGGCCCTGTGTAATACCACCCAG  
AAGACGAGCGACGGGTCTACTATCTGGCTGCTCCCGCCGGGACCATTTGGGCTTGCAACACCGGGCTCACTCCCTGCCT  
ATCTACCACTGTACTCGACCTCACCACCGATTACTGTGTCTGGTTGAGCTCTGGCCAAAGGTGACCTACCACTCCCCTG  
GTTATGTTTTATGGCCAGTTTGGAGAAAAAACCAATATAAAAGAGAGCCGGTGTCTATTAACCTCTGGCCCTGCTGTTGGGA  
GGACTTACTATGGGCGGCATAGCTGCAGGAGTAGGAACCGGGACTACAGCCCTAGTGGCCACCAACAATTGAGCAGCT  
CCAGGCAGCCATACATACAGACCTTGGGGCTTTAGAAAAGTCAGTCAGTGCCCTAGAAAAGTCTCTGACCTCGTTGTCTG  
AGGTGGTCTTACAGAACCGGAGGGGATTAGATCTACTGTTCTTAAAGAAGGAGGATTATGTGCTGCCCTAAAAGAAGAA  
TGCTGTTTTCTACGCGGACCACACTGGCGTAGTAAGAGATAGCATGGCAAAGCTAAGAGAAAGGTTGAACCAGAGACAAAA  
ATTGTTTGAATCAGGACAAGGGTGGTTTGGGGACTGTTTAAACAGGTCCCATGGTTTACGACCTTAATATCCACCATT  
TGGGCCCCCTTGATAATACTTTTATTAATCCTACTCTTCGGACCCCTGTATTCTCAACCGCTTGGTCCAGTTTGTAAAAGAC  
AGAATTTGCGTAGTGCAGGCCCTGGTTTGGACCAACAGTATCACCAACTCAAATCAATAGATCCAGAAGAAGTGGAATC  
ACGTGAATAAAAGATTTTATTTCAGTTTCCAGAAAGAGGGGGGAATGAAAGACCCCACCATCAGGCTTAGCAAGCTAGCTG  
CAGTAACGCCATTTTGAAGGCATGAAAAAGTACCAGAGCTGAGTTCTCAAAAGTTACAAGAAAGTTGAGTTAAAGATTA  
ACAGTTAAAGATTAAGGCTGAATAATACTGGGACAGGGGCCAAATATCGGTGGTCAAGCACCTGGGCCCCGGCTCAGGGC  
CAAGAACAGATGGCTCTCAGACGTCACTGTTAGCAGAAGTCTGATGTTTGAAGAAATAGAGGTGCACAGTGTCTCT  
GGCCACTCCTTGAACCTGTGTGTCTGCCAATGTTCTGACCAGGTGTGTGCCCATTTGTTGAACCTTCATTAGACCCCTTCC  
TCGTACCCCTCCCATACCCATTTTCTTGAATAATAGACATTGTTTGAAGTAAAGTCCACCTCAGTTTCCCCAAATGAC  
CGAGAAATACCCCAAGCCTTATTGAACTAACCAACCAGCTCGCTTCTCGCTTCTGTAACCGCGCTTTTTGCTCCCCAGC  
CCCAGCCCTATAAAAAGGGTAAAACTCCACACTCGGCGCGCCAGTCTCCTCCGATAGACTGCGTGCAGCGGGTACCCGTGT  
TCTCAATAAAGCCTCTTGCTGTTTGCATCCGAATCGTGGTCTCGCTGGTCTTGAGAGGGTCTCCTCAGATTGATTGACT  
ACCCACGTGCGGGGTCTTTCA

>Pmv17

TGAAAGACCCCACCATCAGGCTTAGCAAGCTAGCTGCAGTAACGCCATTTTGAAGGCATGAAAAAGTACCAGAGCTGAG  
TTCTCAAAAGTTACAAGAAAGTTGAGTTAAAGATTAACAGTTAAAGATTAAGGCTGAATAATACTGGGACAGGGGCCAAA  
TATCGGTGGTCAAGCACCTGGGCCCCGGCTCAGGGCCAAGAACAGATGGCTCTCAGACGTCACTGTTAGCAGAAGTCTG  
TCACTGATTTAGAAAAATAGAGGTGCACAGTGTCTGGCCACTCCTTGAACCTGTGTGTCTGCCAATGTTCTGACCAGGT  
GTGTGCCCATTGTTGAACCTTCATTAGACCCCTTTCCTCGTACCCCTCCCATACCCATTTCTTGAATAATAGACATTGTTTA  
GAACTAAAAAGTCCCACCTCAGTTTCCCCAAATGACCGAGAAATACCCCAAGCCTTATTGAACTAACCAACCAGCTCGC  
TTCTCGCTTCTGTAACCGCGCTTTTTGCTCCCCAGCCCCAGCCCTATAAAAAGGGTAAAACTCCACACTCGGCGCGCCA  
GTCCTCCGATAGACTGCGTGCAGCGGGTACCCGTGTTCCCAATAAAGCCTCTTGCTGTTTGCATCCGAATCGTGGTCTCG  
CTGGTCTTTGAGAGGGTCTCCTCAGATTGATTGACTACCCACGTGCGGGGTCTTTCATTTGGAGGTTCCACCGAGATTG  
GAGACCCCTGCCCAGGGACACCGACCCCCCGCCGGGAGGTAAGCTGGCCAGCGGTGTTTTGCTGTCTGTCTCTGTCTTC  
GTGCGTGTGTTGTGCCGGCATCAATGTTTGCCTGCTGTCTGTACTAGTTAGCTAACTAGATCTGTATCTGGCGGTTCCG  
CGAAGAAGTACGAGTTTCTGATTTCCCGGCCGACCCCTGGGAGACGTCCCAGCGGCCTCGGGGCCCTTTTGTGGCC  
CATTCTGTATCAGTTAACCTACCCGAGTCGGACTTTTTGGAGCTCCGCCACTGTACGTGGCTTTGTTGGGGACGAGAGA  
CAGAGACACTTCCCGCCCCCGTCTGAATTTTTGCTTTTCGGTTTTACGCCGAAGCCGCGCCGCGCTGTGATTTGTTTGT  
GTTCTTTTGTCTTCTGTTAGTTTTCTTCTGTCTTTAAGTGTTTTGAGATCATGGGACAGACCGTAACCTACCCCTCTGAG  
TTTAACCTTGCAGCACTGGGGAGATGTCCAGCGCATTGCATCCAACAGTCTGTGGATGTCAGGAAGAGGCGCTGGATTA  
CCTTCTGTTCCGCTGAATGGCCAACCTTCAATGTGGGATGGCCTCAGGATGGTACTTTCAATTTAAGTATTATCTCTCAG  
GTTAAGTCTAGAGTGTGTTTGTCTGGTCCCCACGGACACCCGGATCAGGTCCCATATATCGTCACCTGGGAGGCACCTTGC  
CTATGACCCCCCTCCGTGGGTCAAACCGTTTTGTGTCTCTTAACTTCTCCTCCCTTGCCGACAGCTCCCGTCTCCCGCCCC  
GTCCTTCTGCGCAACCTCCGTCCCGATCTGCCCTTTACCCTGCCCTTACCCCTCTATAAAGTCCAAACCTCCTAAGCCC  
CAGGTTCTCCCTGATAGCGGCGGACCCCTCATTGACCTTCTCACAGAGGACCCCCCGCCGTACAGAGCACAAACCTCCT  
CCTCTGCCAGGGAGAACGACGAAGAAGAGGCGGCCACCACCTCCGAGGTTTTCCCCCCCCCTTCTCCCATGGTGTCTCGA  
CTGCGGGGAAGGAGAGACCCCTCCCGCAGTGGACTCCACCACCTCCAGGCATTTCCACTCCGCATGGGGGGAGATGGCCA

GCTTCAGTATTGGCCGTTTTCTCTTCGGATTTATACAATTGAAAAATAATAACCCTTCCTTTTTCTGAAGATCCAGGTA  
AATTGACGGCCTTGATTGAGTCCGTCTCATCCCCACCAGCCACCTGGGACGACTGTCAGCAGTTGTTGGGGACCCTG  
CTGACCGGAGAAGAAAAGCAGCGGGTGCTCCTAGAGGCTAAAAAGGCAGTCCGGGGCAATGATGGACGCCCCACTCAGTT  
GCCTAATGAAGTCAATGCTGCTTTTTCCCTTGAACGCCCCGTTGGGATTACACCACTACAGAAGGTAGGAACCACCTAG  
TCCTCTATCGCCAGTTGCTCTTAGCGGGTCTCCAGAACGCGGGCAGAAGTCCCACCAATTTGGCCAAGGTAAAAGGGATA  
ACCCAGGGACCTAATGAGTCTCCCTCAGCCTTTTTAGAGAGACTCAAAGAGGCCTATCGCAGGTACACTCCTTATGACCC  
TGAGGACCCAGGGCAAGAAACCAATGTGTCTATGTCTATGTCATTCTGGCAGTCTGCCCCGATATCGGGCGAAAGTTAGAGC  
GGTTAGAAGATTTAAAGAGCAAGACCTTAGGAGACTTAGTGAGGGAAGCTGAAAAGATCTTTAATAAGCGAGAAACCCCG  
GAAGAAAGAGAGGAACGTATCAAGAGAAAAACAGAGAAAAAGAAGAACGCCGTAGGGCAGAGGATGAGCAGAGAGAGAA  
AAAAAGGGACCGCAAAAGACATAGAGAGATGAGCAAGCTCTTGCCACTGTAGTTATTGGTCAGAGACAGGATAGACAGG  
GGGAGAGCGGAGGAGGCCCAACTTGATAAGGACCAATGCGCCTACTGCAAAGAAAAGGGACACTGGGCTAAGGACTGC  
CCAAAGAAGCCACGAGGGCCCCGAGGACTGAGGCCCCAGACCTCCCTCCTAACCTTAGGTGACTAGGGAGGTCAGGGTCA  
GGAGCCCCCCCCCTGAACCCAGGATAACCCTCAAAGTCGGGGGGCAACCCGTCACCTTCCTGGTAGATACTGGGGCCCCAAC  
ACTCCGTGCTGACCCAAAATCCTGGACCCCTAAGTGACAAGGCTGCCTGGGTCCAAGGGGCTACTGGAGGAAAGCGGTAT  
CGCTGGACCACGGATCGCAAAGTACATCTGGGCCAAGGCGTTGCCAGCCGGGACATCCGCCCAGCGAGCTGAACTAATAG  
CACTCACCAGGCCCTAAAGATGGCAGAAGGTAAGAAGCTAAACGTTTATACTGATAGCCGCTATGCCTTTTGCTACCGCC  
CATGTCCATGGAGAAATATATAGGAGACGTGGGTGCTCACCTCAGAAGGCAAGGAGATCAAAAACAAGGGCGAAATCTT  
GGCCTTACTGAAAGCTCTCTTTTTGCCCAAAGACTCAGTATAATTCACTGCCAGGACATCAGAAAGGCAATAGTGCTG  
AAGCTAAAGGCAACCAAATGGCGGACCAGGCAGCCCGGAAGCAGCCATGGGGACTGACACAAAGGCCTCCTCACTTCTC  
ATAGAGACCTCAACCCCGTACACTCCAGACTTCTTCCATTATACTGAGACAGATATAAAGAACCTACAAGAGTTGGGAGC  
CACATATGATAGAGAGAAAAAATATTGGGTCTGCAAGGTAAACCTGTGATGCCTGACCAGTTACCTTTGAATTATTAG  
ACTTCCTTACCAGCTCACCACCTTAGCTATCAGAAGATGAGGGCACTTCTAGACAGGAAAGAAAGCCCCCTATTACATG  
CTAAATAAAGATAAGATCCTCCACGAGGTGGCGGAATCATGCCAAGCCTGTGTCCAAGTAAATGCCAGTAAGACTAAGAT  
CAGGGCCGGAACACGAGTAAGAGGACATCGACCAGGCACCCATTGGGAAATTGACTTTACTGAAGTAAAGCCCGGACTGT  
ATGGGTACAAGTATCTCCTGGTATTCTGTGGACACGTTCTCTGGCTGGGTTGAAGCCTTCCCAACCAAACATGAGACTGCC  
AAAATAGTGACCAAGAACTTCTGAAAGAAATATTTCCAAGGTTTGAATGCCCAAGTGTTGGGGACTGATAATGGGCC  
TGCCTTCGTCTCCAGGTAAAGTCAAGTCGGTGGCCAAAGCTACTGGGATTTGATTGAAACTACATTTGTGCTTACGACCCCC  
AGAGTTCAGGTCAAGTAGAAGAATGAATAGGACAATCAAGAGCACTTTGACCAAAATTAACGCTTGCAACTGACGACTAGA  
GACTGGGTACTCCTACTTCCCTTAGCCCTCTACCGAGCCCGCAACACTCCGGGCCCCCATGGACTCACTCCGTATGAAAT  
CCTGTATGGGGCGCCCCCGCCCTTGTTAATTTCCATGATCCTGAAATGTCAAAGTTTACTAATAGCCCCCTCTCTCCAAG  
CTCACTTACAGGCCCTCCAAGCAGTACAACGAGAGGTCTGGAAGCCACTGGCCGCTGCCTATCAGGACCAGCAGGACCAG  
CCAGTGATACCACACCCCTTCCGTGTAGGCGACACCGTGTGGGTACGCCGGCACCAGACTAAGAACCTGGAACCTCGCTG  
GAAAGGACCCTACACCGTCTGTGACCACCCCCACCGCTCTCAAAGTAGACGGCATCGCTGCGTGGATCCACGCCGCTC  
ACGTAAAAGCGGCGACAACCCCTCCGGCCGGAACAGCATCAGGACCGACATGGAAGGTCCAGCGTTCTCAAAACCCCTTA  
AAGATAAGATTAACCCGTGGGGCCCCCTAATAGTCTTGGGGATCTTAATAAGGGCAGGAGTATCAGTACAACATGACAGC  
CCTCATCAGGTCTTCAATGTTACTTGGAGAGTTACCAACTTAATGACAGGACAAACAGCTAATGCTACCTCCCTCCTGGG  
GACAATGACCGATGCCTTTCTAACTGTACTTTGACTTGTGCGATTTAATAGGGGACGATTGGGATGAGACTGGACTCG  
GGTGTGCACTCCCGGGGAAAGAAAAAGGGCAAGAACATTTGACTTCTATGTTTCCCCGGGCATACTGTACCAACAGGG  
TGTGGAGGGCCGAGAGAGGGCTACTGTGGCAAATGGGGCTGTGAGACCCTGGACAGGCATACTGGAAGCCATCATCATC  
ATGGGACCTAATTTCCCTTAAGCGAGAAAACACCCCTCGGAATCAGGGCCCCCTGTTATGATTCCCTCAGCGGTCTCCAGTG  
ACATCAAGGGCGCCACACCGGGGGGTGATGCAATCCCTTAGTCCTGGAATCACTGACGCGGGCAAAAAGGCCAGCTGG  
GATGGCCCCAAAGTATGGGGACTAAGACTGTACCGATCCACAGGGACCGACCCGGTGACCCGGTTCTCTTTGACCCGCCA  
GGTCTCAATATAGGGCCCCCGCTCCCCATTGGGCCTAATCCCGTGATCACTGACCAGTTACCCCCCTCCCGACCCGTGC  
AGATCATGCTCCCCAGGCCTCCTCAGCCTCCTCCTCCAGGCGCAGCCTCTATAGTCCCTGAGACTGCCCCACCTTCTCAA  
CAACCTGGGACGGGAGACAGGCTGCTAAACCTGGTAGATGGAGCCTACCAAGCTCTCAACCTCACCAGTCTTGACAAAAC  
CCAAGAGTGCTGGTTGTGTCTGGTAGCGGACCCCCCTACTACGAAGGGGTTGCCGTCTTAGTACTTATTCCAACCAT  
CCTCTGCCCCAGCTAACTGCTCCGTGGCCTCCCAACACAAGCTGACCCTGTCCGAAGTGACCGGACAGGGACTCTGCGTA  
GGAGCAGTTCCCAAACCCATCAGGCCCTGTGTAATACCACCCAGAAGGCGAGCGACGGGTCTACTATCTGGCTGCTCC  
CGCCGGGACCATTTGGGCTTGCAACACCGGGCTCACTCCCTGCCTATCTACCCTGTACTCGACCTCACCACCGATTACT  
GTGTCTGGTTGAGCTCTGGCCAAAGGTGACCTACCCTCCCTGGTTATGTTTATGGCCAGTTTGAGAGAAAAACCAA  
TATAAAGAGAGCCGGTGTCAATTAATCTGGCCCTGCTGTTGGGAGGACTTACTATGGGCGGCATAGCTGCAGGAGTAGG  
AACCGGGACTACAGCCCTAGTGGCCACCAAACAATTCGAGCAGCTCCAGGCAGCCATACATACAGACCTTGGGGCTTTAG  
AAAAGTCAGTCAGTGCCCTAGAAAAGTCTCTGACCTCGTTGTCTGAGGTGGTCCTACAGAACCGGAGGGGATTAGATCTA  
CTGTTCTTAAAGAAGGAGGATTATGTGCTGCCCTAAAAGAAGAATGCTGTTTCTACGCGGACCACACTGGCGTAGTAAG  
AGATAGCATGGCAAAGCTAAGAGAAAGGTTGAACCAGAGACAAAATTTGTTTGAATCAGGACAAGGGTGGTTTGGGGAC  
TGTTTTAAGAGTCCCATGTTTCAGACCTTAATATCCACCATTATGGGCCCCCTTAATAATACTTTTATTAATCCTACTC  
TTCGGACCTGTATTCTCAACCGCTTGGTCCAGTTTGTAAAAGACAGAATTTCCGTAGTGCAAGCCCTAGTTTTGACCCA

ACAGTATCACCAACTCAAATCAATAGATCCAGAAAAAGTGAATCACGTGAATAAAAGATTTTTATTTCAGTTTCCAGAAAG  
AGGGGGGAATGAAAGACCCACCATCAGGCTTAGCAAGCTAGCTGCAGTAACGCCATTTTGAAGGCATGAAAAAGTACC  
AGAGCTGAGTTCTCAAAAGTTACAAGAAAGTTTCAGTTAAAGATTAACAGTTAAAGATTAAGGCTGAATAATACTGGGACA  
GGGGCCAAATATCGGTGGTCAAGCACCTGGGCCCCGGCTCAGGGCCAAGAACAGATGGCTCTCAGACGTCAGTGTTAGCA  
GAACTAGCTTCACTGATTTAGAAAAATAGAGGTGCACAGTGCTCTGGCCACTCCTTGAACCTGTGTGTCTGCCAATGTTT  
TGACCAGGTGTGTGCCCATTTGTTGAACCTTCATTAGACCCTTTTCTCGTACCCCTCCCATAACCCATTTCTTGAAAATAGA  
CATTGTTTGAAGTAATAAAGTCCCACCTCAGTTTCCCCAAATGACCGAGAAATACCCCAAGCCTTATTGAACTAACCAA  
CCAGCTCGCTTCTCGCTTCTGTAACCGCGCTTTTTGCTCCCCAGCCCCAGCCCTATAAAAAGGGTAAAAACTCCACACTC  
GGCGCGCCAGTCCCTCCGATAGACTGCGTCGCCCCGGGTACCCGTGTTCCCAATAAAGCCTCTTGCTGTTTGCATCCGAATC  
GTGGTCTCGCTGGTCTTGGAGAGGTCTCCTCAGATTGATTGACTACCCACGTTCGGGGGTCTTTCA

>Pmv18

TGAAAGACCCACCATCAGGCTTAGCAAGCTAGCTGCAGTAACGCCATTTTGAAGGCATGAAAAAGTACCAGAGCTGAG  
TTCTCAAAAGTTACAAGAAAGTTTCAGTTAAAGATTAACAGTTAAAGATTAAGGCTGAATAATACTGGGACAGGGGCCAAA  
TATCGGTGGTCAAGCACCTGGGCCCCGGCTCAGGGCCAAGAACAGATGGCTCTCAGACGTCAGTGTTAGCAGAACTAGCT  
TCACTGATTTAGAAAAATAGAGGTGCACAGTGCTCTGGCCACTCCTTGAACCTGTGTGTCTGCCAATGTTTCTGACCAGGT  
GTGTGCCCATTGTTGAACCTTCATTAGACCCTTTTCTCGTACCCCTCCCATAACCCATTTCTTGAAAATAGACATTGTTT  
AACTAAAAAGTCCCACCTCAGTTTCCCCAAATGACCGAGAAATACCCCAAGCCTTATTGAACTAACCAACCAGCTCGC  
TTCTCGCTTCTGTAACCGCGCTTTTTGCTCCCCAGCCCCAGCCCTATAAAAAGGGTAAAAACTCCACACTCGGCGCGCCA  
GTCCTCCAATAGACTGCGTCGCCCCGGGTACCCGTGTTCTCAATAAAGCCTCTTGCTGTTTGCATCCGAATCGTGGTCTCG  
CTGGTCTCTGAGAGGGTCTCCTCAGATTGATTGACTACCCACCTCGGGGGTCTTTCAATTTGGAGGTTCCACCGAGATTTG  
GAGACCCCTGCCAGGGACACCGACCCCCCGCGGGAGGTAAGCTGGCCAGCGGTCTGTTTCGTGTCTGTCTCTGTCTTC  
GTGCGTGTGTTGTGCCGGCATCCAATGTTTGCCTGCGTCTGTACTAGTTAGCTAACTAGATCTGTATCTGGCGGTTCCG  
CGGAAGAACTGACGAGTTTCGTATTCCCGGCCGACGCCCTGGGAGACGTCCAGCGGCCTCGGGGGCCCCGTTTTGTGGCC  
CATTCTGTATCAGTTAACCTACCCGAGTCGGACTTTTTGGAGCTCCGCCACTGTACGTGGCTTTGTTGGGGGACGAGAGA  
CAGAGACACTTCCCGCCCCCGTCTGAATTTTTGCTTTTCGTTTTACGCCGAAGCCGCGCCGCGCTCTGACTTGTTTTGTT  
GTTCTTTTGTCTTCTGTTAGTTTTCTTCTGTCTTTAAGTGTTTTCGAGATCATGGGACAGACCGTAACCTACCCCTCTGAG  
TTTAACCTTGACGACTGGGAGATGTCCAGCGATTGCATCCAACAGCTCTGTGGATGTGAGGAGGCGCTGGATTA  
CCTTCTGTTCCGCTGAATGGCCAACTTTCAATGTGGGATGGCTCAGGATGGTACTTTCAATTTAAGTATTATCTCTCAG  
GTTAAGTCTAGAGTGTTTTGTCTGGTCCCCACGGACACCCGGATCAGGTCCCATATATCGTCACCTGGGAGGCACTTGC  
CTATGACCCCCCTCCGTGGGTCAAACCGTTTTGTGTCTCCTAAACTTCTCCTTCCCTTGGCGACAGCTCCCGTCTCCCGCCG  
GTCCTTCTGCGCAACCTCCGTCCCGATCTGCCCTTTACCCTGCCCTTACCCCTCTATAAAGTCCAAACCTCCTAAGCCC  
CAGGTTCTCCTGATAGCGGCGGACCCCTCATTGACCTTCTCACAGAGGACCCCCCGCCGTACAGAGCACAACCTCCTC  
CTCTGCCAGGGAGAACGACGAAGAAGAGGCGGCCACCACCTCCGAGGTTTTCCCCCTTCTCCCATGGTGTCTCGACTGC  
GGGGAAGGAGAGACCTCCCGCAGTGGACTCCACCACCTCCAGGCATTTCCACTCCGCATGGGGGAGATGGCCAGCTT  
CAGTATTGGCCGTTTTCTCTTTCGATTTTATACAATTGGAATAATAAACCTTCTTTTCTGAAGATCCAGGTAAATT  
GACGGCCTTGATTGAGTCCGTCTCATCCCCACAGCCACCTGGGACGACTGTCAGCAGTTGTTGGGGACCCCTGCTGA  
CCGAGAAGAAAAGCAGCGGGTGCTCCTAGAGGCTAGAAAGGCAGTCCGGGGCAATGATGGACGCCCCACTCAGTTGCCT  
AATGAAGTCAATGCTGCTTTTTCCCTTGAACGCCCCGTTGGGATTACACCACTACAGAAGGTAGGAACCACCTAGTCCT  
CTATCGCCAGTTGCTCTTAGCGGGTCTCCAGAACGCGGGCAGAAGTCCCACCAATTTGGCCAAGGTAAAAGGGATAACCC  
AGGGACCTAATGAGTCTCCCTCAGCCTTTTTAGAGAGACTCAAAGAGGCCTATCGCAGGTACACTCCTTATGACCCTGAG  
GACCCAGGGCAAGAAACCAATGTGTCTATGTCAATTCATCTGGCAGTCTGCCCGGATATCGGGCGAAAGTTAGAGCGGTT  
AGAAGATTTAAAGAGCAAGACCTTAGGAGACTTAGTGAGGGAAGCTGAAAAGATCTTTAATAAGCGAGAAACCCCGGAAG  
AAAGAGAGGAACGTATCAAGAGAGAAACAGAGGAAAAAGAAGAACGCCGTAGGGCAGAGGATGAGCAGAGAGAGAAAGAA  
AGGGACCGCAGAAGACATAGAGAGATGAGCAAGCTCTTGCCACTGTAGTTATTGGTCAGAGACAGGATAGACAGGGGGG  
AGAGCGGAGGAGGCCCCAACTTGATAAGGACCAATGCGCCTACTGCAAAGAAAAGGGACACTGGGCTAAGGACTGCCCAA  
AGAAGCCACGAGGGCCCCGAGGACTGAGGCCCCAGACCTCCCTCCTAACCTTAGGTGACTAGGGAGGTGAGGTGAGGAG  
CCCCCCCCCTGAACCCAGGATAACCCCTCAAAGTCGGGGGGCAACCCGTACCTTCTGGTAGATACTGGGGCCCCAACACTC  
CGTGCTGACCCAAAATCCTGGACCCCTAAGTGACAAGGCTGCCTGGGTCCAAGGGGCTACTGGAGGAAAGCGGTATCGCT  
GGACCACGGATCGCAAAGTACATCTAGCTACCGGTAAGGTACCCACTCTTTTCTCCATGTACCAGACTGCCCCCTATCCT  
CTGCTAGGAAGAGACTTGCTGACTAACTAAAAGCCCCAAATCCACTTCGAGGGATCAGGAGCTCAGGTTATGGGACCAAT  
GGGACTGCCCCCTGCAAGTGCTGACCCTAAACATAGAAGATGAATATCGGCTACATGAGACCTCAAAGAGCCGGATGTTT  
CTCTAGGGTCCACCTGGCTTTCTGATTTTTCCCAGGTCTGGGCGGAAACCGGGGCGATGGGACTGGCAGTTCCGCAAGCT  
CCTCTGATCATACCTCTGAAGGCAACCTCTACCCCCGTGTCCATAAAACAATACCCCATGTACAAGAAGCCAGACTGGG  
GATCAAGCCCCACATACAGAGACTGTTGGACCAGGGAATACTGGTACCCTGCCAGTCCCCCTGGAACACGCCCCCTGCTAC  
CCGTTAAGAAACCAGGACTAATGATTATAGGCCTGTCCAGGATCTGAGAGAAGTCAACAAGCGGGTGGAAGACATCCAC  
CCCACCGTGCCCAACCTTACAACCTCTTGAGCGGGCTCCCACCGTCCCACCAAGTGGTACACTGTGCTTGATTTAAAGGA  
TGCCTTTTTCTGCCTGAGACTCCACCCACCAGTCAGCCTCTCTTACCTTTGAGTGGAGAGATCCAGAGATGAGAATCT

CAGGACAATTGACCTGGACCAGACTCCCACAGGGTTTTCAAAAACAGTCCCACCCTGTTTTGATGAGGCACTGCACAGAGAC  
CTAGCAGACTTCCGGATCCAGCACCCAGACTTGATCCTGCTACAGTACGTGGATGACTTACTGCTGGCCGCCACTTCTGA  
GCTCGACTGCCAACAAGGTACTCGGGCCCTGTTACAAACCCTAGGGAACCTCGGGTATCGGGCCTCGGCCAAGAAAGCCC  
AAATTTGCCAGAAACAGGTCAAGTATCTGGGGTATCTTCTAAAAGAGGGTCAGAGATGGCTGACTGAGGCCAGAAAAGAG  
ACTGTGATGGGGCAGCCTACTCCGAAGACCCCTCGACAACCTAAGGGAGTTCTTAGGGACGGCAGGCTTCTGTGCCTCTG  
GATCCCTGGGTTTTGCAGAAATGGCAGCCCCCTTGTAACCTCTCACAAAACGGGGACTCTGTTTAATTGGGGCCCAGACC  
AGCAAAAGGCCTATCAAGAAATCAAACAGGCTCTTCTAACTGCCCCAGCCCTGGGATTGCCAGATTTGACTAAGCCCTTT  
GAACTCTTTGTTGACGAGAAGCAGGGCTACGCCAAAGGCGTCTAACGCAAAAACCTGGGACCTTGGCGTCGGCCGGTGGC  
CTACCTGTCCAAAAGCTAGACCCAGTGGCAGCTGGGTGGCCCCCTTGCCCTACGGATGGTAGCAGCCATTGCCGTTCTGA  
CAAAAGATGCAGGCAAGCTAACCATGGGACAGCCGCTAGTATCCTGGCCCCCATGCAGTAGAGGCACTAGTCAAGCAA  
CCCCCTGACCGCTGGCTATCCAACGCCCGCATGACCCACTATCAGGCGATGCTCCTAGATACGGACCGGGTCCAGTTCGG  
ACCGGTGGTAGCCCTAAACCCGGCTACGTTGCTCCCCCTACCGGGGAAAGAGCCTCACCATGACTGCCTCGAGATCTTGG  
CCGAGACACACGGAACCAGACCAGACCTCACGGACCAGCCCCCTCCAGACGCCGACCACACCTGGTATACAGATGGAAGC  
AGCTTCTGCAAGAGGGACAACGTAGGGCTGGAGCAGCGGTGACCACCGAGACCGAGGTAATCTGGGCCAAGGCGTTGCC  
AGCCGGGACATCCGCCCAGCGAGCTGAACTAATAGCACTACCCAGGCCCTAAAGATGGCAGAAGGTAAGAAGCTAAATG  
TTTATACTGATAGCCGCTATGCCTTTGCTACCGCCCATGTCCATGGAGAAATATATAGGAGACGTGGGTTGCTCACCTCA  
GAAGGCAAGGAGATCAAGAACAAGGGCGAAATCTTGGCCTTACTGAAAGCTCTCTTTCTGCCAAAAGACTCAGTATAAT  
TCACTGCCCAGGACATCAGAAAGGCAATAGTGCTGAAGCTAAAGGCAACCGAATGGCGGACCAGGCAGCCCGGGAAGCAG  
CCATGGGGACTGACACAAAGGCCTCCTCACTTCTCATAGAGACCTCAACCCGTACACTCCAGACTTCTTCCATTATACT  
GAGACAGATATAAAGAACCTACAAGAGTTGGGAGCCACATATGATAGAGAGAAAAAATATTGGGTCTGCAAGGTAAACC  
TGTGATGCCTGACCAGTTCACCTTTGAATTATTAGACTTCCTTACCAGCTCACCCACCTTAGCTATCAGAAGATGAGGG  
CACTTCTAGACAGGAAAAAAGCCCCCTATTACATGCTAAATAAAGATAAGATCCTCCACGAGGTGGCGGAATCATGCCAA  
GCCTGTGTCCAAGTAAATGCCAGTAAGACTAAGATCAGGGCCGGAACACGAGTAAGAGGACATCGACCAGGCACCCATTG  
GGAAATTGACTTTACTGAAGTGAAGCCCGGACTGTATGGGTACAAGTATCTCCTGGTATTCTGTTGACACGTTCTCTGGCT  
GGGTTGAAGCCTTCCCAACCAAACATGAGACTGCCAAAATAGTGACCAAGAAACTTCTGGAAGAAATATTTCCAAGGTTT  
AGAATGCCCCAAGTGTTGGGGACTGATAATGGGCCTGCCTTCGTCTCCCAGGTAAGTCAGTCGGTGGCCAAGCTACTGGG  
GATTGATTGGAATACTGATTGTGCTTACAGACCCAGAGTTCAAGTCAGTAAAAAGAATGAATAGGACAATCAAGGAGA  
CTTTGACCAAATTAACGTTTGAACCTGGCACTGAGACTGGGTACTCCTACTTCCCTTAGCCCTTACCGAGCCCGCAAC  
ACTCCGGGCCCCCATGGACTCACTCCGTATGAAATCCTGTATGGGGCGCCCCCGCCCCCTTGTTAATTTCCATGATCCTGA  
AATGTCAAAGTTTTACTAATAGCCCCTCTCTCCAAGCTCACTTACAGGCCCTCCAAGCAGTACAACGAGAGGTCTGGAAGC  
CACTGGCCGCTGCCTATCAGGACCAGCTGGACCAGCCAGTGATACCACACCCCTTCCGTGTGCGCGACACCGTGTGGGTA  
CGCCGGCACCAGACTAAGAACCTTGAACCTCGCTGGAAAGGACCCTACACCGTCTCTGCTGACCACCCCCACCGCTCTCAA  
AGTAGACGGCATCGCTGCGTGGATCCACGCCGCTCACGTAAAAGCGGCGACAACCCCTCCGGCCGGAACAGCATCAGGAC  
CGACATGGAAGGTCCAGCGTTCTCAAAACCCCTTAAAGATAAGATTAACCCGTGGGGCCCCCTAATAATCCTGGGGATCT  
TAATAAGGGCAGGAGTATCAGTACAACATGACAGCCCTCATCAGGTCTTCAATGTTACTTGGAGAGTTACCAACTTAATG  
ACAGGACAAACAGCTAATGCTACCTCCCTCCTGGGGACAATGACCGATGCCTTTCTTAACTGTACTTTGACTTGTGCGA  
TTTAATAGGGGACGACTGGGATGAGACTGGACTCGGGTGTGCGACTCCCGGGGGAAGAAAAAGGCCAGCTGGGATGGCC  
CCAAAGTATGGGGACTAAGACTGTACCGATCCACAGGGACCGACCCGGTGACCCGGTTCTCTTTGACCCGCCAGGTCTCT  
AATATAGGGCCCCGCGTCCCCATTGGGCCTAATCCCGTGATCACTGACCAGTTACCCCCCTCCCGACCCGTGCAGATCAT  
GCTCCCCAGGCCTCCTCAGCCTCCTCCTCCAGGCGCAGCCTCTATAGTCCCTGAGACTGCCCCACCTTCTCAACAACCTG  
GGACGGGAGACAGGCTGCTAAACCTGGTAGATGGAGCCTACCAAGCTCTCAACCTCACCAGTCTTGACAAAACCCAAGAG  
TGCTGGTTGTGTCTGGTAGCGGGACCCCCCTACTACGAAGGGGTTGCCGTCTAGGTACTTATTCCAACCATACTCTGC  
CCCAGCTAACTGCTCCGTGGCCTCCCAACACAAGCTGACCCTGTCCGAAGTGACCGGACAGGGACTCTGCGTAAGAGCAG  
TTCCCAAAACCCATCAGGCCCTGTGTAATACCACCCAGAAGACGAGCGACGGGTCTACTATCTGGCTGCTCCCGCCGGG  
ACCATTGGGGCTGCAACACCGGGCTCACTCCCTGCCTATCTACCACTGTACTCGACCTCACCACCGATTACTGTGTCTCT  
GGTTGAGCTCTGGCCAAAGGTGACCTACCACTCCCCTGTTTATGTTTATGGCCAGTTTGAGAGAAAAACCAATATAAAA  
GAGAGCCGGTGTCAATTAACCTGGCCCTGCTGTTGGGAGGACTTACTATGGGCGGCATAGCTGCAGGAGTAGGAACCGGG  
ACTACAGCCCTAGTGGCCACCAACAATTGAGCAGCTCCAGGCAGCCATACATACAGACCTTGGGGCTTTAAAAAAGTC  
AGTCAGTGCCCTAGAAAAGTCTCTGACCTCGTTGTCTGAGGTGGTCTACAGAACCGAGGGGATTAGATCTACTGTTCC  
TAAAGAAGGAGGATTATGTGCTGCCCTAAAAGAAGAATGCTGTTTCTACGCGGACCACACTGGCGTAGTAAGAGATAGC  
ATGGCAAAGCTAAGAGAAAGGTTGAACCAGAGACAAAAATTGTTCAAATCAGGACAAGGGTGGTTTTGAGGGACTGTTTAA  
CAGGTCCCCATGGTTCACGACCTTAATATCCACCATTATGGGCCCTTAATAATACTTTTATTAATCCTACTCTTCGGAC  
CCTGTATTCTCAACCGCTTGGTCCAGTTTGTAAAAGACAGAATTTCCGGTAGTGACGGCCCTGGTTTTGACCCAACAGTAT  
CACCAACTCAAATCAATAGATCCAGAAGAAGTGAATCACGTGAATAAAAGATTTTATTAGTTTTCCAGAAAGAGGGGGG  
AATGAAAGACCCCACCATCAGGCTTAGCAAGCTAGCTGCAGTAACGCCATTTTGAAGGCATGAAAAAGTACCAGAGCTG  
AGTTCTCAAAAGTTACAAGAAAGTTCAGTTAAAGATTAACAGTTAAAGATTAAGGCTGAATAATACTGGGACAGGGGCCA  
AATATCGGTGGTCAAGCACCTGGGCCCGGCTCAGGGCCAAGAACAGATGGCTCTCAGACGTCAGTGTTAGCAGAACTAG

CTTCACTGATTTAGAAAAATAGAGGTGCACAGTGCTCTGGCCACTCCTTGAACCTGTGTGTCTGCCAATGTTCTGACCAG  
GTGTGTGCCATTGTTGAACCTTCATTAGACCCTTTCTCGTACCCCTCCCATACCCATTTCTTGAAAATAGACATTGTT  
TAAAACTAAAAAGTCCCACCTCAGTTTTCCCCAAATGACCGAGAAATACCCCAAGCCTTATTCGAACTAACCAACCAGCTC  
GCTTCTCGCTTCTGTAAACGCGCTTTTTGCTCCCCAGCCCCAGCCCTATAAAAAGGGTAAAACTCCACACTCGGCGCGC  
CAGTCCTCCAATAGACTGCGTCGCCCCGGGTACCCGTGTTCTCAATAAAGCCTCTTGCTGTTTTGCATCCGAATCGTGGTCT  
CGCTGGTCCTTGAGAGGGTCTCCTCAGATTGATTGACTACCCACCTCGGGGGTCTTTCA

>Pmv19

TGAAAGACCCACCATCAGGCTTAGCAAGCTAGCTGCAGTAACGCCATTTTGAAGGCATGAAAAAGTACCAGAGCTGAG  
TTCTCAAAAGTTACAAGAAAGTTCAAGTTAAAGATTAAAGTTAAAGCTGAATAATACTGGGACAGGGGCCAAA  
TATCGGTGGTCAAGCACCTGGGCCCCGGCTCAGGGCCAAGAACAGATGGCTCTCAGACGTCAGTGTTAGCAGAACTAGCT  
TCACTGATTTAGAAAAATAGAGGTGCACAGTGCTCTGGCCACTCCTTGAACCTGTGTGTCTGCCAATGTTCTGACCAGGT  
GTGTGCCATTGTTGAACCTTCATTAGACTCTTTCCTCGTACCCCTCCCATACCCATTTCTTGAAAATAGACATTGTTTA  
GAACTAAAAAGTCCCACCTCAGTTTTCCCCAAATGACCGAGAAATACCCCAAGCCTTATTCGAACTAACCAACCAGCTCG  
CTTCTCGCTTCTGTAAACGCGCTTTTTGCTCCCCAGCCCCAGCCCTATAAAAAGGGTAAAACTCCACACTCGGCGCGCC  
AGTCCTCCGATAGACTGCGTCGCCCCGGGTACCCGTGTTCTCAATAAAGCCTCTTGCTGTTTGCATCCGAATCGTGGTCTC  
GCTGGTCCTTGAGAGGGTCTCCTCAGATTGATTGACTACCCACGTCGGGGGTCTTTTCATTTGGAGGTTCCACCGAGATTT  
GGAGACCCCTGCCCAGGGACCACCGACCCCCCGCGGGAGGTAAGCTGGCCAGCGGTCGTTTCGTGTCTGTCTCTGTCTT  
CGTGCGTGTGTTGTGCCGGCATCCAATGTTTGCGCCTGCGTCTGTACTAGTTAGCTAACTAGATCTGTATCTGGCGGTTCC  
GCGGAAGAACTGACGAGTTCGTATTTCCCGGCCGAGCCCCCTGGGAGACGTCCCAGCGGCCTCGGGGGCCCGTTTTGTGGC  
CCATTCTGTATCAGTTAACCTACCCGAGTCGGACTTTTTGGAGCTCCGCCACTGTACGTGGCTTTGTTGGGGGACGAGAG  
ACAGAGACACTTCCCGCCCCCGTCTGAATTTTTGCTTTTGGTTTTACGCCGAAGCCGCGCCGCGCGTCTGATTTGTTTGT  
TGTTCTTTTTGTTCTTCGTTAGTTTTCTTCTGTCTTTAAGTGTTTTCGAGATCATGGGACAGACCGTAACTACCCCTCTGA  
GTTTAACCTTGACGACTGGGGAGATGTCCAGCGCATTGCATCCAACCAGTCTGTGGATGTCAGGAAGAGGCGCTGGATT  
ACCTTCTGTTCCGCTGAATGGCCAACCTTCAATGTGGGATGGCCTCAGGATGGTACTTTCAATTTAAGTATTATCTCTCA  
GGTTAAGTCTAGAGTGTTTTGTCTGGTCCCCACGGACACCCGGATCAGGTCCCATATATCGTCACCTGGGAGGCACTTG  
CCTATGACCCCCCTCCGTGGGTCAAACCGTTTGTGTCTCCTAAACTTCCTCCCTTGCCGACAGCTCCCGTCTCTCCGCCC  
GGTCCTTCTCGCTAACCTCCGTCCCGATCTGCCCTTTACCTTGCCTTTACCCCTCTATAAAGTCAAACCTCTCAAGCC  
CCAGGTTCTCCCTGATAGCGGCGGACCCCTCATTGACCTTCTCACAGAGGACCCCGCCGTACAGAGCACAAACCTCCT  
CCTGTGCCAGGGAGAACGACGAAGAAGAGGGCGCCACCACCTCCGAGGTTTTCCCCCTTCTCCCATGGTGTCTCGACTG  
CGGGGAAGGAGAGACCCTCCCGCAGTGGAATCCACCACCTCCAGGCATTTCCACTCCGCATGGGGGGAGATGGCCAGCT  
TCAGTATTGGCCGTTTTCTCTTCGGATTTATACAATTGGAAAAATAATAACCTTCTTTTTCTGAAGATCCAGGTAAAT  
TGACGGCCTTGATTGAGTCCGTCTCATACCCACCAGCCCACCTGGGACGACTGTCAGCAGTTGTTGGGGACCCTGCTG  
ACCGGAGAAGAAAAGCAGCGGGTGCTCCTAGAGGCTAGAAAGGCAGTCCGGGGCAATGATGGACGCCCCACTCAGTTGCC  
TAATGAAGTCAATGCTGCTTTTTCCCTTGAACGCCCCGGTTGGGATTACACCCTACAGAAGGTAGGAACCACCTAGTCC  
TCTATCGCCAGTTGCTCTTAGCGGGTCTCCAGAACGCGGGCAGAAGTCCACCAATTTGGCCAAGGTAAAAGGGATAACC  
CAGGGACCTAATGAGTCTCCCTCAGCCTTTTTAGAGAGACTCAAAGAGGCCTATCGCAGGTACACTCCTTATGACCCTGA  
GGACCCAGGGCAAGAAACCAATGTGTCTATGTCAATCATCTGGCAGTCTGCCCCGATATCGGGCGAAAGTTAGAGCGGT  
TAGAAGATTTAAAGAGCAAGACCTTAGGAGACTTAGTGAGGGAAGCTGAAAAGATCTTTAATAAGCGAGAAACCCCGGAA  
GAAAGAGAGGAACGTATCAAGAGAGAAACAGAGGAAAAAGAAGAACGCCGTAGGGCAGAGGATGAGCAGAGAGAGAAAGA  
AAGGGACCGCAGAAGACATAGAGAGATGAGCAAGCTCTTGGCCACTGTAGTTATTGGTCAGAGACAGGATAGACAGGGGG  
GAGAGCGGAGGAGGCCCAACTTGATAAGGACCAATGCGCCTACTGCAAAGAAAAGGGACACTGGGCTAAGGACTGCCCA  
AAGAAGCCACGAGGGCCCCGAGGACTGAGGCCCCAGACCTCCCTCCTAACCTTAGGTGACTAGGGAGGTGAGGTCAGGA  
GCCCCCCCCCTGAACCCAGGATAACCTCAAAGTCGGGGGGCAACCCGTCACCTTCTGGTAGATACTGGGGCCCAACT  
CCGTGCTGACCCAAAATCCTGGACCCCTAAGTGACAAGGCTGCCTGGGTCCAAGGGGCTACTGGAGGAAAGCGGTATCGC  
TGGACCACGGATCGCAAAGTACATCTAGCTACCGGTAAGGTACCCACTCTTCTCCTCATGTACCAGACTGCCCTATCC  
TCTGCTAGGAAGAGACTTGCTGACTAACTAAAAGCCCAATCCACTTCGAGGGATCAGGAGCTCAGGTTATGGGACCAA  
TGGGACTGCCCTGCAAGTGCTGACCCTAAACATAGAAGATGAGTATCGGCTACATGAGACCTCAAAGAGCCGGATGTT  
TCTCTAGGGTCCACCTGGCTTTCTGATTTTTCCCCAGGTCTGGGCGGAAACCGGGGGCATGGGACTGGCAGTTCGCCAAGC  
TCCTCTGATCATACCTCTGAAGGCAACCTCTACCCCGTGTCCATAAAACAATACCCCATGTACACAAGAAGCCAGACTGG  
GGATCAAGCCCCACATACAGAGACTGTTGGACCAGGGAATACTGGTACCCTGCCAGTCCCCCTGGAACACGCCCCCTGCTA  
CCCGTTAAGAAACCAGGGACTAATGATTATAGGCCTGTCCAGGATCTGAGAGAAGTCAACAAGCGGGTGGAAGACATCCA  
CCCCACCGTGCCCAACCTTACAACCTCTTGAGCGGGCTCCACCGTCCACCAGTGGTACACTGTGCTTGATTTAAAGG  
ATGCCTTTTTCTGCCTGAGACTCCACCCACCAGTCAGCCTCTCTTGCCTTTGAGTGGAGAGATCCAGAGATGGGAATC  
TCAGGACAATTGACCTGGACCAGACTCCCACAGGGTTTCAAAAACAGTCCCACCCTGTTTGATGAGGCACTGCACAGAGA  
CCTAGCAGACTTCCGGATCCAGCACCCAGACTTGATCCTGCTACAGTACGTGGATGACTTACTGCTGGCCGCCACTTCTG  
AGCTCGACTGCCAACAAGGTACTCGGGCCCTGTTACAAACCTAGGGAACCTCGGGTATCGGGCCTCGGCCAAGAAAGCC  
CAAATTTGCCAGAAACAGGTCAAGTATCTGGGGTATCTTCTAAAAGAGGGTCAGAGATGGCTGACTGAGGCCAGAAAAGA

GACTGTGATGGGGCAGCCTACTCCGAAGACCCCTCGACAACCTAAGGGAGTTCTTAGGGACGGCAGGCTTCTGTGCGCTCT  
GGATCCCTGGGTTTGCAGAAATGGCAGCCCCCTTGTACCCTCTCACAAAACGGGGACTCTGTTTAAATTGGGGCCAGAC  
CAGCAAAAGGCCTATCAAGAAATCAAACAGGCTCTTCTAACTGCCCCAGCCCTGGGATTGCCAGATTTGACTAAGCCCTT  
TGAACCTCTTTGTTGACGAGAAGCAGGGCTACGCCAAAGGCGTCCTAACGCAAAAACCTGGGACCTTGGCGTCGGCCGGTGG  
CCTACCTGTCCAAAAGCTAGACCCAGTGGCAGCTGGGTGGCCCCCTTGCCCTACGGATGGTAGCAGCCATTGCCGTTCTG  
ACAAAAGATGCAGGCAAGCTAACCATGGGACAGCCGCTAGTCATCCTGGCCCCCATGCAGTAGAGGCACCTAGTCAAGCA  
ACCCCTGACCGCTGGCTATCCAACGCCCGCATGACCCACTATCAGGCGATGCTCCTAGATACGGACCGGTCCAGTTCTG  
GACCGGTGGTAGCCCTAAACCCGGCTACGTTGCTCCCCCTACCGGGGAAAGAGCCTCACCATGACTGCCTCGAGATCTTG  
GCCGAGACACACGGAACCAGACCAGACCTCACGGACCAGCCCCCTCCAGACGCCGACCACACCTGGTATACAGATGGAAG  
CAGCTTCTGCAAGAGGGCAACGTAGGGCTGGAGCAGCGGTGACCACCGAGACCGAGGTAATCTGGGCCAAGGCGTTGC  
CAGCCGGGACATCCGCCCAGCGAGCTGAACTAATAGCACTCACCAGGCCCTAAAGATGGCAGAAGGTAAGAAGCTAAAT  
GTTTATACTGATAGCCGCTATGCCTTTGCTACCGCCCATGTCCATGGAGAAATATATAGGAGACGTGGGTTGCTCACCTC  
AGAAGGCAAGGAGATCAAGAACAAGGGCGAAATCTTGGCCTTACTGAAAGCTCTCTTTCTGCCAAAAGACTCAGTATAA  
TTCCTGCCCAGGACATCAGAAAGGCAATAGTGCTGAAGCTAAAGGCAACCGAATGGCGGACCAGGCAGCCCGGAAGCA  
GCCATGGGGACTGACACAAAGGCCTCCTCACTTCTCATAGAGACCTCAACCCCGTACACTCCAGACTTCTTCCATTATAC  
TGAGACAGATATAAAGAACCTACAAGAGTTGGGAGCCACATATGATAGAGAGAAAAAATATTGGGTCTGCAAGGTAAAC  
CTGTGATGCCTGACCACTTACCTTTGAATTATTAGACTTCTTACCAGCTCACCACCTTAGCTATCAGAAGATGAGG  
GCCTTCTAGACAGGAAAGAAAGCCCTATTACATGCTAAATAAAGATAAGATCCTCCACGAGGTGGCGGAATCATGCCA  
AGCCTGTGTCCAAGTAAATGCCAGTAAGACTAAGATCAGGGCCGGAACACGAGTAAGAGGACATCGACCAGGCACCCATT  
GGGAAATTGACTTTACTGAAGTGAAGCCCGGACTGTATGGGTACAAGTATCTCCTGGTATTCTGTTGACACGTTCTCTGGC  
TGGGTTGAAGCCTTCCCAACCAACATGAGACTGCCAAAATAGTGACCAAGAACTTCTGGAAGAAATATTTCCAAGGTT  
TGGAATGCCCCAAGTGTTGGGGACTGATAATGGGCCTGCCTTCGTCTCCAGGTAAGTCAGTCGGTGGCCAAGCTACTGG  
GGATTGATTGGAACCTACATTGTGCTTACAGACCCAGAGTTCAGGTCAGGTAGAAAGAATGAATAGGACAATCAAGGAG  
ACTTTGACCAAATTAACGCTTGCAACTGGCACTAGAGACTGGGTACTCCTACTTCCCTTAGCCCTCTACCGAGCCCGCAA  
CACTCCGGGCCCCCATGGACTCACTCCGTATGAAATCCTGTATGGGGCGCCCCGCCCCCTTGTTAATTTCCATGATCCTG  
AAATGTCAAAGTTTACTAATAGCCCCCTCTCTCCAAGCTCACTTACAGGCCCTCCAAGCAGTACAACGAGAGGTCCTGGAAG  
CCACTGGCCGCTGCCTATCAGGACCAGCTGGACAGCCAGTGATACCAACCCCTTCCGTGTGCGGACACCGTGTGGGT  
ACGCCGGCACCGACTAAGAACTTGAACCTCGCTGGAAAGGACCCCTACACCGTCTGCTGACACCCCCACCGCTCTCA  
AAGTAGACGGCATCGTGCCTGGATCCACGCCGCTCACGTAAAAGCGGCGACAACCCCTCCGGCCGGAACAGCATCAGGA  
CCGACATGGAAGGTCCAGCGTTCTCAAAACCCCTTAAAGATAAGATTAACCCGTGGGGCCCCCTAATAATCCTGGGGATC  
TTAATAAGGGCAGGAGTATCAGTACAACATGACAGCCCTCATCAGGTCTTCAATGTTACTTGGAGAGTTACCAACTTAAT  
GACAGGACAAACAGCTAATGCTACCTCCCTCCTGGGGACAATGACCGATGCCTTTCCTAAACTGTACTTTGACTTGTGCG  
ATTTAATAGGGGACGACTGGGATGAGACTGGACTCGGGTGTGCGACTCCCGGGGGAAGAAAAAGGGCAAGAACATTTGAC  
TTCTATGTTTGGCCCGGCATACTGTACCAACAGGGTGTGGAGGGCCGAGAGAGGGCTACTGTGGCAAATGGGGCTGTGA  
GACCACTGGACAGGCATACTGGAAGCCATCATCATCATGGGACCTAATTTCCCTTAAGCGAGGAAACACCCCTCGGAATC  
AGGGCCCCCTGTTATGATTCTCAGCGGTCTCCAGTGACATCAAGGGCGCCACACCGGGGGGTGATGCAATCCCTAGTC  
CTGGAATTCCTGACGCGGGCAAAAAGGCCAGCTGGGATGGCCCCAAAGTATGGGGACTAAGACTGTACCGATCCACAGG  
GACCGACCCGGTGACCCGTTCTCTTTGACCCGCCAGGTCTCAATATAGGGCCCCGCGTCCCCATTGGGCCTAATCCCG  
TGATCACTGACCAGTTACCCCCCTCCCGACCCGTGCAGATCATGCTCCCCAGGCCTCCTCAGCCTCCTCCTCCAGGCGCA  
GCCTCTATAGTCCCTGAGACTGCCCCACCTTCTCAACAACCTGGGACGGGAGACAGGCTGCTAAACCTGGTAGATGGAGC  
CTACCAAGCTCTCAACCTCACCAGTCTTGACAAAACCCAAGAGTGCTGGTTGTGTCTGGTAGCGGGACCCCCCTACTACG  
AAGGGGTTGCCGTCTTAGGTACTTATTCCAACCATACCTCTGCCCCAGCTAACTGCTCCGTGGCCTCCCAACACAAGCTG  
ACCCTGTCCGAAGTGACCGGACAGGGACTCTGCGTAGGAGCAGTTCCTCAAAAACCCATCAGGCCCTGTGTAATACCACCCA  
GAAGACGAGCGACGGTCTACTATCTGGCTGCTCCCGCCGGGACCATTGTTGGCTTGCAACACCGGGCTCACTCCCTGCC  
TATCTACCACTGTACTCGACCTCACCACCGATTACTGTGTCTGTTGAGCTCTGGCCAAAGGTGACCTACCACTCCCT  
GGTTATGTTTATGGCCAGTTTGAGAGAAAAACCAATATAAAAAGAGAGCCGGTGTCAATTAACCTCTGGCCCTGCTGTTGGG  
AGGACTTACTATGGGCGGCATAGCTGCAGGAGTAGGAACCGGGACTACAGCCCTAGTGGCCACCAACAATTCGAGCAGC  
TCCAGGCAGCCATACATACAGACCTTGGGGCTTTAGAAAAGTCAGTCAGTGCCCTAGAAAAGTCTCTGACCTCGTTGTCT  
GAGGTGGTCCTACAGAACCGGAGGGGATTAGATCTACTGTTCTTAAAGAAGGAGGATTATGTGCTGCCCTAAAAGAAGA  
ATGCTGTTTCTACGCGGACCACACTGGCGTAGTAAGAGATAGCATGGCAAAGCTAAGAGAAAGGTTGAACCAGAGACAAA  
AATTGTTTGAATCAGGACAAGGTGGTTTGGAGGACTGTTTAAACAGGTCCCCATGGTTTACGACCTTAATATCCACCATT  
ATGGGCCCCCTTGATAATACTTTTATTAATCCTACTCTTCGACCCCTGTATTCTCAACCGCTTGGTCCAGTTTGTAAAAGA  
CAGAATTTCCGTAGTGCAGGCCCTGGTTTTGACCCAACAGTATCACCAACTCAAATCAATAGATCCAGAAGAAGTGGAAT  
CACGTGAATAAAAGATTTTATTAGTTTCCAGAAAGAGGGGGGAATGAAAGACCCACCATCAGGCTTAGCAAGCTAGCT  
GCAGTAACGCCATTTTGAAGGCATGAAAAAGTACCAGAGCTGAGTTCTCAAAGTTACAAGAAAGTTAGTTAAAGATT  
AACAGTTAAAGATTAAGGCTGAATAATACTGGGACAGGGGCCAAATATCGGTGGTCAAGCACCTGGGCCCCGGCTCAGGG  
CCAAGAACAGATGGCTCTCAGACGTGAGTGTTAGCAGAACTAGCTTCACTGATTTAGAAAAATAGAGGTGCACAGTGCTC

TGGCCACTCCTTGAACCTGTGTGTCTGCCAATGTTCTGACCAGGTGTGTGCCCATTTGTTGAACCTTCATTAGACCCCTTTC  
CTCGTACCCCTCCCATACCCATTTCTTGAAAATAGACATTGTTTAGAACTAAAAAGTCCCACCTCAGTTTCCCCAAATGA  
CCGAGAAAATACCCCAAGCCTTATTTCGAACTAACCAACCAGCTCGCTTCTCGCTTCTGTAACCGCGCTTTTTTGCTCCCCA  
GCCCCAGCCCTATAAAAAGGGTAAAACTCCACACTCGGCGCGCCAGTCTCCGATAGACTGCGTTCGCCCCGGGTACCCGT  
GTTCTCAATAAAGCCTCTTGCTGTTTGCATCCGAATCGTGGTCTCGCTGGTCTTGAGAGGGTCTCCTCAGATTGATTGA  
CTACCCACGTGCGGGGTCTTTCA

>Pmv2

TGAAAGACCCACCATCAGGCTTAGCAAGCTAGCTGCAGTAACGCCATTTTGAAGGCATGAAAAAGTACCAGAGCTGAG  
TTCTCAAAAGTTACAAGAAAGTTCAGTTAAAGATTAAAGTTAAAGATTAAAGCTGAATAATACTGGGACAGGGGCCAAA  
TATCGGTGGTCAAGCACCTGGGCCCCGGCTCAGGGCCAAGAACAGATGGCTCTCAGACGTCAGTGTTAGCAGAACTAGCT  
TCACTGATTTAGAAAAATAGAGGTGCACAGTGCTCTGGCCACTCCTTAAACCTGTGTGTCTGCCAATGTTCTGACCAGGT  
GTGTGCCCATTTGTTGAACCTTCATTAGACCCCTTTCCTCGTACCCCTCCCATACCCATTTCTTGAAAATAGACATTGTTTA  
GAACTAAAAAGTCCCACCTCAGTTTCCCCAAATGACCGAGAAATACCCCAAGCCTTATTTCGAACTAACCAACCAGCTCGC  
TTCTCGCTTCTGTAACCGCGCTTTTTTGCTCCCCAGCCCCAGCCCTATAAAAAGGGTAAAACTCCACACTCGGCGCGCCA  
GTCCTCCGATAGACTGCGTTCGCCCCGGGTACCCGTGTTCTCAATAAAGCCTCTTGCTGTTTGCATCCGAATCGTGGTCTCG  
CTGGTCTCTTGAGAGGGTCTCCTCAGATTGATTGACTACCCACGTCGGGGGTCTTTTCAATTTGGAGGTTCCACCGAGATTTG  
GAGACCCCTGCCCAGGGACCAACGACCCCCCGCCGGGAGGTAAGCTGGCCAGCGGTCTGTTTCGTGTCTGTCTCTGTCTTC  
GTGCGTGTGTTGTGCCGGCATCCAATGTTTGCGCCTGCGTCTGTACTAGTTAGCTAACTAGATCTGTATCTGGCGGTTCCG  
CGGAAGAACTGACGAGTTTCGTATTCCCGGCCGCGAGCCCTGGGAGACGTCCAGCGGCCTCGGGGGCCCCGTTTTGTGGCC  
CATTCTGTATCAGTTAACCTACCCGAGTCGGACTTTTTTGAGCTCCGCCACTGTACGTGGCTTTGTTGGGGGACGAGAGA  
CAGAGACACTTCCCGCCCCCGTCTGAATTTTTGCTTTTCGGTTTTACGCCGAAGCCGCGCCGCGCGTCTGATTTGTTTGT  
GTTCTTTTGTCTTTCGTTAGTTTTCTTCTGTCTTTAAGTGTTTTTCGAGATCATGGGACAGACCGTAACCTACCCCTCTGAG  
TTTAACCTTGCAGCACTGGGGAGATGTCCAGCGCATTGCATCCAACCAGTCTGTGGATGTCAGGAAGAGGCGCTGGATTA  
CCTTCTGTTCCGCTGAATGGCCAACCTTTCAATGTGGGATGGCCTCAGGATGGTACTTTCAATTTAAGTATTATCTCTCAG  
GTTAAGTCTAGAGTGTTTTGTCTGGTCCCCACGGACACCCGGATCAGGTCCCATATATCGTCACCTGGGAGGCACCTTGC  
CTATGACCCCCCTCCGTGGGTCAAACCGTTTTGTGTCTCTCTAAACTTCCCTCCCTTGCCGACAGCTCCCGTCTCTCCGCCCCG  
GTCCTTCTGCGCAACTCCGTCCCGATCTGCCCTTTTACCCTGCCCTTACCCCTCTATAAAGTCCAACACTCTTAAGCCC  
CAGGTTTCTCCCTAATAGCGGCGGACCCCTCATTGACCTTCTCAGAGAGACCCCCCGCCGTACAGAGCACAACTCCTCCTC  
CTCTGCCAGGGAGAACGACGAAGAAGAGGCGCCACCACTCCGAGGTTTTCCCCCCTTCTCCCATGGTGTCTCGACTGC  
GGGGAAGGAGAGACCCTCCCGCAGTGGACTCCACCACCTCCAGGCATTTCCACTCCGCATGGGGGGAGATGGCCAGCTT  
CAGTATTGGCCGTTTTTCTCTCGGATTTATACAATTGGAATAATAAACCTTCTTTTTCTGAAGATCCAGGTAAATT  
GACGGCCTTGATTGAGTCCGTCTCATCACCCACCAGCCACCTGGGACGACTGTCAGCAGTTGTTGGGGACCCCTGCTGA  
CCGGAAGAAGAAAGCAGCGGGTGCTCCTAGAGGCTAGAAAGGCAGTCCGGGGCAATGATGGACGCCCCACTCAGTTGCCT  
AATGAAGTCAATGCTGCTTTTTCCCTTGAACGCCCCGTTGGGATTACACCACTACAGAAGGTAGGAACCACCTAGTCTCT  
CTATCGCCAGTTGCTCTTAGCGGGTCTCCAGAACGCGGGCAGAAGTCCCACCAATTTGGCCAAGGTAAAAGGGATAACCC  
AGGGACCTAATGAGTCTCCCTCAGCCTTTTTAGAGAGACTCAAAGAGGCCTATCGCAGGTACACTCCTTATGACCCTGAG  
GACCCAGGGCAAGAAACCAATGTGTCTATGTCAATCATCTGGCAGTCTGCCCGGATATCGGGCGAAAGTTAGAGCGGTT  
AGAAGATTTAAAGAGCAAGACCTTAGGAGACTTAGTGAGGGAAGCTGAAAAGATCTTTAATAAGCGAGAAACCCCGGAAG  
AAAGAGAGGAACGTATCAAGAGAGAAACAGAGGAAAAAGAAGAACGCCGTAGGGCAGAGGATGAGCAGAGAGAAAAAGAA  
AGGGACCGCAGAAGACATAGAGAGATGAGCAAGCTCTTGGCCACTGTAGTTATTGGTCAGAGACAGGATAGACAGGGGGG  
AGAGCGGAGGAGGCCCAACTTGATAAGGACCAATGCGCCTACTGCAAAGAAAAGGGACACTGGGCTAAGGACTGCCCAA  
AGAAGCCACGAGGGCCCCGAGGACTGAGGCCCCAGACCTCCCTCCTAACCTTAGGTGACTAGGGAGGTGAGGTGAGGAG  
CCCCCCCCCTGAACCCAGGATAACCTCAAAGTCGGGGGGCAACCCGTACCTTCTTGGTAGATACTGGGGCCCCAACACTC  
CGTGCTGACCCAAAATCCTGGACCCCTAAGTGACAAGGCTGCCTGGGTCCAAGGGGCTACTGGAGAAAAGCGGTATCGCT  
GGACCACGGATCGCAAAGTACATCTAGCTACCGGTAAGGTACCCACTCTTCTCCTCATGTACCAGACTGCCCTATCCT  
CTGCTAGGAAGAGACTTGCTGACTAACTAAAAGCCCAATCCACTTCGAGGGATCAGGAGCTCAGGTTATGGGACCAAT  
GGGACTGCCCCTGCAAGTGCTGACCCTAAACATAGAAGATGAGTATCGGCTACATGAGACCTCAAAGAGCCGGATGTTT  
CTCTAGGGTCCACCTGGCTTTCTGATTTTTCCCAGGTCTGGGCGGAAACCGGGGGCATGGGACTGGCAGTTTCGCCAAGCT  
CCTCTGATCATACCTCTGAAGGCAACCTCTACCCCCGTGTCCATAAAACAATACCCCATGTCAACAAGAAGCCAGACTGGG  
GATCAAGCCCCACATACAGAGACTGTTGGACCAGGGAATACTGGTACCCTGCCAGTCCCCCTGGAACACGCCCCCTGCTAC  
CCGTTAAGAAACCAGGGACTAATGATTATAGGCCTGTCCAGGATCTGAGAGAAGTCAACAAGCGGGTGAAGACATCCAC  
CCCACCGTGCCCAACCTTACAACCTCTTGAGCGGGCTCCCACCGTCCCACCAAGTGGTACACTGTGCTTGATTTAAAGGA  
TGCCTTTTTCTGCCTGAGACTCCACCCACCAGTCAGCCTCTCTTCGCCTTTGAGTAGAGAGATCCAGAGATGGGAATCT  
CAGGACAATTGACCTGGACCAGACTCCACAGGGTTTTCAAAAACAGTCCCACCCTGTTTGTATGAGGCACTGCACAGAGAC  
CTAGCAGACTTCCGGATCCAGCACCCAGACTTGATCCTGCTACAGTACGTGGATGACTTACTGCTGGCCGCCACTTCTGA  
GCTCGACTGCCAACAAGGTACTCGGGCCCTGTTACAAACCTAGGGAACCTCGGGTATCGGGCCTCGGCCAAGAAAGCCC  
AAATTTGCCAGAAACAGGTCAAGTATCTGGGGTATCTTCTAAAAGAGGGTCAGAGATGGCTGACTGAGGCCAGAAAAGAG

ACTGTGATGGGGCAGCCTACTCCGAAGACCCCTCGACAACCTAAGGGAGTTCTAGGGACGGCAGGCTTCTGTGCGCTCTG  
GATCCCAGGGTTTTGCAGAAATGGCAGCCCCCTTGTACCCTCTCACCAAAACGGGGACTCTGTTTAATTGGGGCCCAGACC  
AGCAAAAGGCCTATCAAGAAATCAAACAGGCTCTTCTAACTGCCCCAGCCCTGGGATTGCCAGATTTGACTAAGCCTTTT  
GAACTCTTTGTTGACGAGAAGCAGGGCTACGCCAAAGGCGTCTTAACGCAAAAACCTGGGACCTTGGCGTCGGCCGGTGGC  
CTACCTGTCCAAAAGCTAGACCCAGTGGCAGCTGGGTGGCCCCCTTGCCTACGGATGGTAGCAGCCATTGCCGTTCTGA  
CAAAAGATGCAGGCAAGCTAACCATGGGACAGCCGCTAGTCATCTGGCCCCCATGCAGTAGAGGCACTAGTCAAGCAA  
CCCCCTGACCGCTGGCTATCCAACGCCCCGATGACCCACTATCAGGCGATGCTCCTAGATACGGACCGGGTCCAGTTCGG  
ACCGGTGGTAGCCCTAAACCCGGCTACGTTGCTCCCCCTACCGGGGAAAGAGCCTCATCATGACTGCCTCGAGATCTTGG  
CCGAGACACACGGAACAGACCAGACCTCACGGACCAGCCCCCTCCAGACGCCGACCACACCTGGTATACAGATGGAAGC  
AGCTTCTCTGCAAGAGGGACAACGTAGGGCTGGAGCAGCGGTGACCACCGAGACCGAGGTAATCTGGGCCAAGGCGTTGCC  
AGCCGGGACATCCGCCAGCGAGCTGAACTAATAGCACTCACCAGGCCCTAAAGATGGCAGAAGGTAAGAAGCTAAATG  
TTTATACTGATAGCCGCTATGCCTTTGCTACCGCCCATGTCCATGGAGAAATATATAGGAGACGTGGGTTGCTCACCTCA  
GAAGGCAAGGAGATCAAGAACAAGGGCGAAATCTTGGCCTTACTGAAAGCTCTCTTTCTGCCCAAAAGACTCAGTATAAT  
TCACTGCCCAGGACATCAGAAAGGCAATAGTGCTGAAGCTAAAGGCAACCGAATGGCGGACCAGGCAGCCCGGGAAGCAG  
CCATGGGGACTGACACAAAGGCCTCCTCACTTCTCATAGAGACCTCAACCCGTACACTCCAGACTTCTTCCATTATACT  
GAGACAGATATAAAGAACCTACAAGAGTTGGGAGCCACATATGATAGAGAGAAAAAATATTGGGTCTGCAAGGTAAACC  
TGTGATGCCTGACCACTTACCTTTAAATTATTAGACTTCTTACCAGCTCACCACCTTAGCTATCAGAAGATGAGGG  
CACTTCTAGACAGGAAAGAAAGCCCCCTATTACATGCTAAATAAAGATAAGATCCTCCACGAGGTGGCGGAATCATGCCAA  
GCCTGTGTCCAAGTAAATGCCAGTAAGACTAAGATCAGGGCCGGAACACGAGTAAGAGGACATCGACCAGGCACCCATTG  
GGAAATTGACTTTACTGAAGTGAAGCCCGGACTGTATGGGTACAAGTATCTCCTGGTATTCTGTTGACACGTTCTCTGGCT  
GGGTTGAAGCCTTCCCAACCAACATGAGACTGCCAAAATAGTGACCAAGAACTTCTGGAAGAAATATTTCCAAGGTTT  
GGAATGCCCCAAGTGTGGGGACTGATAATGGGCCTGCCTTCGTCTCCCAGGTAAGTCAGTCGGTGGCCAAGCTACTGGG  
GATTGATTGGAACTACAGACCCAGAGTTCAGGTCAGGTAGAAAGAATGAATAGGACAATCAAGGAGACTTTGACCAAA  
TTAACGCTTGCAACTGGCACTAGAGACTGGGTACTCCTACTTCCCTTAGCCCTCTACCGAGCCCGCAACACTCCGGGCCC  
CCATGGACTCACTCCGTATGAAATCCTGTATGGGGCGCCCCGCCCCCTTGTTAATTTCCATGATCCTGAAATGTCAAAGT  
TTACTAATAGCCCCCTCTCTCCAAGCTCACTTACAGGCCCTCCAAGCAGTACAACGAGAGGTCTGGAAGCCACTGGCCGCT  
GCCTATCAGGACCAGCTGGACCCAGCTGATACCAACCCCTTCCGTGTGCGCGACACCGTGTGGGTACGCCGGCACC  
GACTAAGAAGCTTGAACCTCGCTGGAAAGGACCTACACCCGTCTGCTGACCAACCCCAACCGCTCTCAAAGTAGACAGCCA  
TCGCTGCGTGGATCCACGCCGCTCACGTAAAAGCGCGACAACCCCTCCGGCCGGAACAGCATCAGGACCGCATGGAAG  
GTCCAGCGTTCTCAAAACCCCTTAAAGATAAGATTAACCCGTGGGGCCCCCTAATAATCCTGGGGATCTTAATAAGGGCA  
GGAGTATCAGTACAACATGACAGCCCTCATCAGGTCTTCAATGTTACTTGGAGAGTTACCAACTTAATGACAGGACAAAC  
AGCTAATGCTACCTCCCTCCTGGGGACAATGACCGATGCCTTTCCTAACTGTACTTTGACTTGTGCGATTTAATAGGGG  
ACGACTGGGATGAGACTGGACTCGGGTGTGCACTCCCGGGGGAAGAAAAAGGGCAAGAACATTTGACTTCTATGTTTGC  
CCCGGGCATACTGTACCAACAGGGTGTGGAGGGCCGAGAGAGGGCTACTGTGGCAAATGGGGCTGTGAGACCACTGGACA  
GGCATACTGGAAGCCATCATCATCATGGGACCTAATTTCCCTTAAGCGAGGAAACACCCCTCAGAATCAGGGCCCCCTGTT  
ATGATTCTCAGCGGTCTCCAGTGACATCAAGGGCGCCACACCGGGGGGTGATGCAATCCCTAGTCTCTGGAATTCCT  
GACGCGGGCAAAAAGGCCAGCTGGGATGGCCCCAAAGTATGGGGACTAAGACTGTACCGATCCACAGGGACCGACCCGGT  
GACCCGGTTCTCTTTGACCCGCCAGGTCTCAATATAGGGCCCCGCGTCCCCATTGGGCCTAATCCCGTGATCACTGACC  
AGTTACCCCCCTCCCGACCCGTGCAGATCATGCTCCCCAGGCCTCCTCAGCCTCCTCCTCCAGGCGCAGCCTCTATAGTC  
CCTGAGACTGCCCCACCTTCTCAACAACCTGGGACGGGAGACAGGCTGCTAAACCTGGTAGATGGAGCCTACCAAGCTCT  
CAACCTCACCAGTCCCGACAAAACCCAAGAGTGCTGGTTGTGTCTGGTAGCGGGACCCCCCTACTACGAAGGGGTTGCCG  
TCCTAGGTACTTATTCCAACCATACCTCTGCCCCAGCTAACTGCTCCGTGGCCTCCCAACACAAGCTGACCCTGTCCGAA  
GTGACCGGACAGGGACTCTGCGTAGGAGCAGTTCCCAAAACCCATCAGGCCCTGTGTAATACCACCCAGAAGACGAGCGA  
CGGGTCTACTATCTGGCTGCTCCCGCCGGGACCATTTGGGCTTGCAACACCGGGCTCACTCCCTGCCTATCTACCACTG  
TACTCGACCTCACCACCGATTACTGTGTCTGGTTGAGCTCTGGCCAAAGGTGACCTACCACTCCCCTGGTTATGTTTAT  
GGCCAGTTTGGAGAAAAAACCAATATAAAAGAGAGCCGGTGTCAATTAACCTCTGGCCCTGCTGTTGGGAGGACTTACTAT  
GGGCGGCATAGCTGCAGGAGTAGGAACCGGGACTACAGCCCTAGTGGCCACCAACAATTGAGCAGCTCCAGGCAGCCA  
TACATACAGACCTTGGGGCTTTAGAAAAGTCAGTCAGTGCCCTAGAAAAGTCTCTGACCTCGTTGTCTGAGGTGGTCCTA  
CAGAACCAGGAGGGGATTAGATCTACTGTTCTAAAGAAGGAGGATTATGTGCTGCCCTAAAGAAGAATGCTGTTTCTA  
CGCGGACCACACTGGCGTAGTAAGAGATAGCATGGCAAAGCTAAGAGAAAGGTTGAACCAGAGACAAAAATTGTTTCAAT  
CAGGACAAGGGTGGTTTTGAGGGACTGTTTAAACAGGTCCCCATGGTTTACGACCTTAATATCCACCATTATGGGCCCCCTTG  
ATAATACTTTTTATTAATCCTACTCTTCGACCCCTGTATTCTCAACCGCTTGGTCCAGTTTGTAAAAGACAGAATTTCCGT  
AGTGCAGGCCCTGGTTTTGACCCAACAGTATCACCAACTCAAATCAATAGATCCAGAAGAAGTGAATCACGTGAATAAA  
AGATTTTATTAGTTTCCAGAAAGAGGGGGGAATGAAAGACCCACCATCAGGCTTAGCAAGCTAGCTGCAGTAACGCCA  
TTTTGCAAGGCATGAAAAAGTACCAGAGCTGAGTTCTCAAAGTTACAAGAAAGTTAGTTAAAGATTAACAGTTAAAGA  
TTAAGGCTGAATAATACTGGGACAGGGGCCAAATATCGGTGGTCAAGCACCTGGGCCCCGGCTCAGGGCCAAGAACAGAT  
GGCTCTCAGACGTGAGTGTAGCAGAACTAGCTTCACTGATTTAGAAAAATAGAGGTGCACAGTGCTCTGGCCACTCCTT

AAACCTGTGTGTCTGCCAATGTTCTGACCAGGTGTGTGCCCATTTGTTGAACCTTCATTAGACCCTTTCTCTCGTACCCCTC  
CCATACCCATTTCTTGAAAATAGACATTGTTTAGAACTAAAAAGTCCCACCTCAGTTTCCCCAAATGACCGAGAAATACC  
CCAAGCCTTATTTCGAACTAACCAACCAGCTCGCTTCTCGCTTCTGTAACCGCGCTTTTTGCTCCCCAGCCCCAGCCCTAT  
AAAAAGGGTAAAAACTCCACACTCGGCGCGCCAGTCTCCGATAGACTGCGTGCCTCGGGTACCCGTGTTCTCAATAAAG  
CCTCTTGCTGTTTGCATCCGAATCGTGGTCTCGCTGGTCTTGAGAGGGTCTCCTCAGATTGATTGACTACCCACGTGCG  
GGGTCTTTCA

>Pmv20

TGAAAGACCCCACCATCAGGCTTAGCAAGCTAGCTGCAGTAACGCCATTTTGCAGGCATGAAAAAGTACCAGAGCTGAG  
TTCTCAAAAGTTACAAGAAAGTTCAAGTTAAAGATTAAAGTTAAAGATTAAAGCTGAATAATACTGGGACAGGGGCCAAA  
TATCGGTGGTCAAGCACCTGGGCCCCGGCTCAGGGCCAAGAACAGATGGCTCTCAGACGTCAGTGTTAGCAGAACTAGCT  
TCACTGATTTAGAAAAATAGAGGTGCACAGTGCTCTGGCCACTCCTTAAACCTGTGTGTCTGCCAATGTTCTGACCAGGT  
GTGTGCCCATTTGTTGAACCTTCATTAGACCCTTTCTCTCGTACCCCTCCCATACCCATTTCTTGAAAATAGACATTGTTTA  
GAACTAAAAAGTCCCACCTCAGTTTCCCCAAATGACCGAGAAATACCCCAAGCCTTATTTCGAACTAACCAACCAGCTCGC  
TTCTCGCTTCTGTAACCGCGCTTTTTGCTCCCCAGCCCCAGCCCTATAAAAAGGGTAAAAACTCCACACTCGGCGCGCCA  
GTCCTCCGATAGACTGCGTGCCTCGGGTACCCGTGTTCCCAATAAAGCCTCTTGCTGTTTGCATCCGAATCGTGGTCTCG  
CTGGTCTCTTGAGAGGGTCTCCTCAGATTGATTGACTACCCACGTGCGGGGTCTTTTCAATTTGGAGGTCCCACCGAGATTTG  
GAGACCCCTGCCCAGGGACCAACCGATCCCCCGCCGGGAGGTAAGCTGGCCAGCGGTCTGTTTCTGTCTGTCTCTGTCTTC  
GTGCGTGTGTTGTGCCGGCATCCAATGTTTGCCTGCTGCTGTACTAGTTAGCTAACTAGATCTGTATCTGGCGGTTCCG  
CGGAAGAACTGACGAGTTCTGATTCCCGGCCGCGAGCCCTGGGAGACGTCCAGCGGCCTCGGGGGCCCCGTTTTGTGGCC  
CATTCTGTATCAGTTAACCTACCCGAGTCGGACTTTTTGGAGCTCCGCCACTGTACGTGGCTTTGTTGGGGGACGAGAGA  
CAGAGACACTTCCCGCCCCCGTCTGAATTTTTGCTTTTGGTTTTACGCCGAAGCCGCGCCGCGCGTCTGATTTGTTTGT  
GTTCTTTTGTCTTCTGTTAGTTTTCTTCTGTCTTTAAGTGTTTTTCGAGATCATGGGACAGACCGTAACCTACCCCTCTGAG  
TTTAACCTTGACAGCACTGGGGGGATGTCCAGCGCATTGCATCCAACAGTCTGTGGATGTCAGGAAGAGGCGCTGGATTA  
CCTTCTGTTCCGCTGAATGGCCAACCTTTCAATGTGGGATGGCCTCAGGATGGTACTTTCAATTTAAGTATTATCTCTCAG  
GTTAAGTCTAGAGTGTTTTGTCTGGTCCCCACGGACACCCGGATCAGGTCCCATATATCGTCACCTGGGAGGCACCTGCG  
CTATGACCCCCCTCCGTGGGTCAAACCGTTTTGTGTCTCTCTAAACTTCTCCTTCCCTTGGCGACAGCTCCCGTCTCTCCGCCCCG  
GTCCTTCTGCGCAACCTCCGTCCCGATCTGCCCTTTACCTTACCCTTACCCCTCTATAAAGTCCAAACCTCTTAAGCCC  
CAGGTTCTCCCTGATAGCGGCGGACCCCTCATTGACCTTCTCAGAGGAGACCCCGCCGTCACAGACACAACCTCCCG  
CAGTGGACTCCACCCTCCAGGCATTTCCACTCCGATGGGGGAGATGGCCAGCTTCAGTATTGGCCGTTTTCTCT  
TCGGATTTATACAATTGAAAAATAATAACCTTCTTTTTCTGAAGATCCAGGTAAATTGACGGCCTTGATTGAGTCCGT  
CCTCATCACCCACCAGCCCACCTGGGACGACTGTGACGAGTTGTTGGGGACCCTGCTGACCGGAGAAGAAAAGCAGCGGG  
TGCTCCTAGAGGCTAGAAAGGCAGTCCGGGGCAATGATGGACGCCCCACTCAGTTACCTAATGAAGTCAATGCTGCTTTT  
CCCCTTGAACGCCCCGGTTGGGATTACACCACTACAGAAGGTAGGAACCACCTAGTCTCTATCGCCAGTTGCTCTTAGC  
GGGTCTCCAGAACGCGGGCAGAAGTCCACCAATTTGGCCAAGGTAAAAGGGATAACCCAGGGACCTAATGAGTCTCCCT  
CAGCCTTTTTTAGAGAGACTCAAAGAGGCCTATCGCAGGTACACTCCTTATGACCCTGAGGACCCAGGGCAAGAAACCAAT  
GTGTCTATGTCAATCATCTGGCAGTCTGCCCCGATATCGGGCGAAAGTTAGAGCGGTTAGAAGATTTAAAGAGCAAGAC  
CTTAGGAGACTTAGTGAGGGAAGCTGAAAAGATCTTTAATAAGCGAGAAACCCCGGAAGAAAGAGAGGAACGTATCAAGA  
GAGAAACAGAGGAAAAAGAAGACGCCGTAGGGCAGAGGATGAGCAGAGAGAGAAAGAAAGGGACCGCAGAAGACATAGA  
GAGATGAGCAAGCTCTTGGCCACTGTAGTTATTGGTCAGAGACAGGATAGACAGGGGGGAGAGCGGAGGAGGCCCAACT  
TGATAAGGACCAATGCGCCTACTGCAAAGAAAAGGGACACTGGGCTAAGGACTGCCCAAAGAAGCCACGAGGGCCCCGAG  
GACTGAGGCCCCAGACCTCCCTCCTAACCTTAGGTGACTAGGGAGGTGAGGTGAGGAGCCCCCCCCCTGAACCCAGGATA  
ACCCTCAAAGTCGGGGGGCAACCCGTCACCTTCTGGTAGATACTGGGGCCCAACACTCCGTGCTGACCCAAAATCCTGG  
ACCCCTAAGTGACAAGGCTGCCTGGGTCCAAGGGGCTACTGGAGGAAAGCGGTATCGCTGGACCACGGATCGCAAAGTAC  
ATCTAGCTACCGGTAAGGTACCCACTCTTCTCTCATGTACCAGACTGCCCCCTATCCTCTGCTAGGAAGAGACTTGCTG  
ACTAAACTAAAAGCCCCAAATCCACTTCGAGGGATCAGGAGCTCAGGTTATGGGACCAATGGGACTGCCCTGCAAGTGCT  
GACCCATAACATAGAAGATGAGTATCGGCTACATGAGACCTCAAAGAGCCGGATGTTTCTCTAGGGTCCACCTGGCTTT  
CTGATTTTTCCCGAGGTCTGGGCGGAAACCGGGGCGATGGGACTGGCAGTTTCGCCAAGCTCCTCTGATCATACCTCTGAAG  
GCAACCTCTACCCCGTGTCCATAAAACAATACCCCATGTACACAAGAAGCCAGACTGGGGATCAAGCCCCACATACAGAG  
ACTGTTGGACCAGGGAATACTGGTACCCTGCCAGTCCCCCTGGAACACGCCCCCTGCTACCCGTTAAGAAACCAGGGACTA  
ATGATTATAGGCCTGTCCAGGATCTGAGAGAAGTCAACAAGCGGGTGAAGACATCCACCCACCGTGGCCAACCTTAC  
AACCTCTTGAGCGGGCTCCACCGTCCACCACTGGTACACTGTGCTTGATTTAAAGGATGCCTTTTTCTGCCTGAGACT  
CCACCCACCAAGTCAGCCTCTCTTCGCCTTTGAGTGGAGAGATCCAGAGATGGGAATCTCAGGACAATTGACCTGGACCA  
GACTCCCACAGGGTTTTCAAAAACAGTCCCACCCTGTTTGATGAGGCACTGCACAGAGACCTAGCAGACTTCCGGATCCAG  
CACCCAGACTTGATCCTGCTACAGTACGTGGATGACTTACTGCTGGCCGCCACTTCTGAGCTCGACTGCCAACAAGGTAC  
TCGGGCCCCTGTTACAAACCTAGGGAACCTCGGGTATCGGGCCTCGGCCAAGAAAGCCCAAATTTGCCAGAAACAGGTCA  
AGTATCTGGGGTATCTTCTAAAAGAGGGTCAGAGATGGCTGACTGGGGCCAGAAAAGAGACTGTGATGGGGCAGCCTACT  
CCGAAGACCCCTCGACAACCTAAGGGAGTTCCTAGGGACGGCAGGCTTCTGTGCGCTCTGGATCCCTGGGTTTGAGAAAT

GGCAGCCCCCTTGTACCCTCTCACCAAACGGGGACTCTGTTTAAATTGGGGCCAGACCAGCAAAAGGCCTATCAAGAAA  
TTAAACAGGCTCTTCTAACTGCCCCAGCCCTGGGATTGCCAGATTTGACTAAGCCCTTTGAACTCTTTGTTGACGAGAAG  
CAGGGCTACGCCAAAGGCGTCCTAACGCAAAAAGCTGGGACCTTGGCGTCGGCCGGTGGCCTACCTGTCCAAAAGCTAGA  
CCCAGTGGCAGCTGGGTGGCCCCCTTGCCCTACGGATGGTAGCAGCCATTGCCGTTCTGACAAAAGATGCAGGCAAGCTAA  
CCATGGGACAGCCGCTAGTCATCCTGGCCCCCATGCAGTAGAGGCACCTAGTCAAGCAACCCCCCTGACCGCTGGCTATCC  
AACGCCCGCATGACCCACTATCAGGCGATGCTCCTAGATACGGACCGGTCCAGTTCCGACCGGTGGTAGCCCTAAACCC  
GGCTACGTTGCTCCCCCTACCGGGGAAAGAGCCTCACCATGACTGCCTCGAGATCTTGGCCGAGACACACGGAACCAGAC  
CAGACCTCACGGACCAGCCCCCTCCAGACGCCGACCACACCTGGTATACAGATGGAAGCAGCTTCCTGCAAGAGGGACAA  
CGTAGGGCTGGAGCAGCGTGACCACCGAGACCGAGGTAATCTGGGCCAAGGCGTTGCCAGCCGGGACATCCGCCACGC  
AGCTGAACCTAATAGCACTACCCAGGCCCTAAAGATGGCAGAAGGTAAGAAGCTAAATGTTTATACTGATAGCCGCTATG  
CCTTTGCTACCGCCCATGTCCATGGAGAAATATATAGGAGACGTGGGTGCTCACCTCAGAAGGCAAAGAGATCAAGAAC  
AAGGGCGAAATCTTGGCCTTACTGAAAGCTCTCTTTCTGCCAAAAGACTCAGTATAATTCAGTCCCAGGACATCAGAA  
AGGCAATAGTGCTGAAGCTAAAGGCAACCGAATGGCGGACCAGGCAGCCCGAGAAGCAGCCATGGGGACTGACACAAAGG  
CCTCCTCACTTCTCATAGAGACCTCAACCCCGTACACTCCAGACTTCTTCCATTACACTGAGACAGATATAAAGAACCTA  
CAAGAGTTGGGAGCCACATATGATAGAGAGAAAAAATATTGGGTCTGCAAGGTAAACCTGTGATGCCTGACCAGTTCAC  
CTTTGAATTATTAGACTTTCCTTACCAGCTCACCACCTTAGCTATCAGAAGATGAGGGCACTTCTAGACAGGAAAGAAA  
GCCCCATTATTACATGCTAAATAAAGATAAGATCCTCCACGAGGTGGCGGAATCATGCCAAGCCTGTGTCCAAGTAAATGCC  
AGTAAGACTAAGATCAGGGCCGGAACACGAGTAAGAGGACATCGACCAGGCACCCATTGGGAAATTGACTTTACTAAAGT  
GAAGCCCGGACTGTATGGGTACAAGTATCTCCTGGTATTCTGTGGACACGTTCTCTGGCTGGGTTGAAGCCTTCCCAACCA  
AACATGAGACTGCCAAAATAGTGACCAAGAACTTCTGGAAGAAATATTTCCAAGGTTTGAATGCCCAAGTGTTGGGG  
ACTGATAATGGGCCTGCCTTCGTCTCCAGGTAAGTCAGTCGGTGGCCAAGCTACTGGGGATTGATTGGAAACTACATTG  
TGCTTACAGACCCAGAGTTTCCAGGTAGGTAAGAAATGAATAGGACAATCAAGGAGACTTTGACCAAATTAACGCTTG  
CAACTGGCACTAGAGACTGGGTACTCCTACTTCCCTTAGCCCTCTACCGAGCCCGCAACACTCCGGGCCCCCATGGACTC  
ACTCCGTATGAAATCCTGTATGGGGCGCCCCCGCCCCCTTGTTAATTTCCATGATCCTGAAATGTCAAAGTTTACTAATAG  
CCCCTCTCTCCAAGCTCACTTACAGGCCCTCCAAGCAGTACAACGAGAGGTCTGGAAGCCACTGGCCGCTGCCTATCAGG  
ACCAGCTGGAGCCAGTCAGTGATACCACACCCCTTCCGTGTGGCGACACCGTGTGGGTACGCCGGCACCAGACTAAGAAC  
TTGGAACCTCGCTGGAAGGACCCCTACACCGTCTCTGCTGACCAACCCACCGCTCTCAAAGTAGACGGCATCGTGCCTG  
GATCCACGCGCTCAGTAAAGCGGCGACACCCCTCCGGCCGGAACAGCATCAGGACCGAGTGAAGGTCAGGCTT  
CTCAAAACCCCTTAAAGATAAGATTAACCCGTGGGGCCCCCTAATAATCCTGGGGATCTTAATAAGGGCAGGAGTATCAG  
TACAACATGACAGCCCTCATCAGGTCTTCAATGTTACTTGGAGAGTTACCAACTTAATGACAGGACAAAACAGCTAATGCT  
ACCTCCCTCCTGGGGACAATGACCGATGCCTTTCTTAACTGTACTTTGACTTGTGCGATTTAATAGGGGACGACTGGGA  
TGAGACTGGACTCGGGTGTGCACTCCCGGGGGAAGAAAAAGGGCAAGAACATTTGACTTCTATGTTTGGCCCGGGCATA  
CTGTACCAACAGGGTGTGGAGGGCCGAGAGAGGGCTACTGTGGCAAATGGGGCTGTGAGACCACTGGACAGGCATACTGG  
AAGCCATCATCATCATGGGACCTAATTTCCCTTAAAGCGAGGAAACACCCCTCGGAATCAGGGCCCCCTGTTATGATTCTC  
AGCGGTCTCCAGTGACATCAAGGGCGCCACACCGGGGGGTGATGCAATCCCTAGTCTGGAATTCAGTGACGCGGGCA  
AAAAGGCCAGCTGGGATGGCCCCAAAGTATGGGGACTAAGACTGTACCGATCCACAGGGACCGACCCGGTGACCCGGTTC  
TCTTTGACCCGCCAGGTCTCAATATAGGGCCCCGCGTCCCCATTGGGCCTAATCCCGTGATCACTGACCAGTTACCCCC  
CTCCCGACCCGTGCAGATCATGCTCCCCAGGCCTCCTCAGCCTCCTCCTCCAGGCGCAGCCTCTATAGTCCCTGAGACTG  
CCCCACCTTCTCAACAACCTGGGACGGGAGACAGGCTGCTAAACCTGGTAGATGGAGCCTACCAAGCTCTCAACCTCACC  
AGTCCCGACAAAACCCAAGAGTGCTGGTTGTGTCTGGTAGCGGGACCCCCCTACTACGAAGGGGTTGCCGCTCCTAGGTAC  
TTATTCCAACCATACCTCTGCCCCAGCTAACTGCTCCGTGGCCTCCCAACACAAGCTGACCCCTGTCCGAAGTGACCGGAC  
AGGGACTCTGCGTAGGAGCAGTTCCCAAACCCATCAGGCCCTGTGTAATACCACCCAAAAGACGAGCGACGGGTCTAC  
TATCTGGCTGCTCCCGCCGGGACCATTGGGGCTTGCAACACCGGGCTCACTCCCTGCCTATCTACCACTGTACTCGACCT  
CACCACCGATTACTGTGTCTGGTTGAGCTCTGGCCAAAGGTGACCTACCACTCCCTGGTTATGTTTATGGCCAGTTTG  
AGAGAAAAACCAATATAAAAGAGAGCCGGTGTCAATTAACCTTGCCCTGCTGTTGGGAGGACTTACTATGGGCGGCATA  
GCTGCAGGAGTAGGAACCGGGACTACAGCCCTAGTGCCCAACAAATTCGAGCAGCTCCAGGCAGCCATACATACAGA  
CCTTGGGGCTTTAGAAAAGTCAGTCAGTGCCCTAGAAAAGTCTCTGACCTCGTTGTCTGAGGTGGTCTACAGAACCGGA  
GGAGATTAGATCTACTGTTCTTAAAGAAGGAAGATTATGTGCTGCCCTAAAAAAGAATGCTGTTTCTACGCGGACCAC  
ACTGGCGTAGTAAGAGATAGCATGGCAAAGCTAAGAGAAAGGTTGAACCAGAGACAAAAATTGTTTCAATCAGGACAAGG  
GTGGTTTGGAGGACTGTTTAAACAGGTCCCCATGGTTTACGACCTTAATATCCACCATTATGGGCCCCCTTGATAATACTTT  
TATTAATCCTACTCTTCGACCCCTGTATTCTCAACCGCTTGGTCCAGTTTGTAAAAGACAGAATTTCCGTAGTGCAGGCC  
CTGGTTTTGACCCAACAGTATCACCAACTCAAATCAATAGATCCAGAAGAAGTGAATCACGTGAATAAAAGATTTTATT  
CAGTTTCCAGAAAGAGGGGGGAATGAAAGACCCACCATCAGGCTTAGCAAGCTAGCTGCAGTAACGCCATTTTGAAGG  
CATGAAAAAGTACCAGAGCTGAGTTCTCAAAGTTACAAGAAAGTTTCAAGTTAAAGATTAACAGTTAAAGATTAAGGCTGA  
ATAATACTGGGACAGGGGCCAAATATCGGTGGTCAAGCACCTGGGCCCCGGCTCAGGGCCAAGAACAGATGGCTCTCAGA  
CGTCAGTGTTAGCAGAACTAGCTTCACTGATTTAGAAAAATAGAGGTGCACAGTGCTCTGGCCACTCCTTAAACCTGTGT  
GTCTGCCAATGTTCTGACCAGGTGTGTGCCCATTTGTTGAACCTTCATTAGACCCTTTCCTCGTACCCCTCCCATACCCAT

TTCTTGAAAATAGACATTGTTTGAAGTAAAAAGTCCCACCTCAGTTTCCCCAAATGACCGAGAAATACCCCAAGCCTTA  
TTCGAACTAACCAACCAGCTCGCTTCTCGCTTCTGTAAACCGCGCTTTTTGCTCCCCAGCCCCAGCCCTATAAAAAGGGTA  
AAAACCTCCACACTCGGCGCGCCAGTCTCCGATAGACTGCGTGCAGCCGGGTACCCGTGTTCCCAATAAAGCCTCTTGCTG  
TTTGCATCCGAATCGTGGTCTCGCTGGTCTTGAGAGGGTCTCCTCAGATTGATTGACTACCCACGTGCGGGGTCTTTCA  
>Pmv21

TGAAAGACCCCACCATCAGGCTTAGCAAGCTAGCTGCAGTAACGCCATTTTGCAAGGCATGAAAAAGTACCAGAGCTGAG  
TTCTCAAAAGTTACAAGAAAGTTCAGTTAAAGATTAACAGTTAAAGATTAAGGCTGAATAATACTGAGACAGGGGCCAAA  
TATCGGTGGTCAAGCACCTGGGCCCCGGCTCAGGGCCAAGAACAGATGGCTCTCAGACGTCAGTGTTAGCAGAACTAGCT  
TCACTGATTTAGAAAAATAGAGGTGCACAGTGTCTTGCCCACTCCTTAAACCTGTGTGTCTGCCAATGTTCTGACCAGGT  
GTGTGCCCATTGTTGAACCTTCATTAGACCTTTCTCGTACCCCTCCCATACCCATTTCTTGAAAAATAGACATTGTTTA  
GAACTAAAAAGTCCCACCTCAGTTTCCCCAAATGACCGAGAAATACCCCAAGCCTTATTGAACTAACCAACCAGCTCGC  
TTCTCGCTTCTGTAAACCGCGCTTTTTGCTCCCCAGCCCCAGCCCTATAAAAAGGGTAAAAACTCCACACTCGGCGCGCCA  
GTCCTCCGATAGACTGCGTGCAGCCGGGTACCCGTGTTCCCAATAAAGCCTCTTGCTGTTTGCATCCGAATCGTGGTCTCG  
CTGGTCTTTGAGAGGGTCTCCTCAGATTGATTGACTACCCACGTGCGGGGTCTTTCATTTGGAGGTCCCACCGAGATTTG  
GAGACCCCTGCCAGGGACCAACGACCCCCCGCGGGAGGTAAGCTGGCCAGCGGTGCTTTCGTGTCTGTCTCTGTCTTC  
GTGCGTGTGTTGTGCCGCGCATCCAATGTTTGCCTGCGTCTGTACTAGTTAGCTAACTAGATCTGTATCTGGCGGTTCCG  
CGGAAGAACTGACGAGTTCGTATTCCCGGCCGCGAGCCCTGGGAGACGTCCAGCGGCCTCGGGGGCCCCGTTTTGTGGCC  
CATTCTGTATCAGTTAACTACCCGAGTCGACTTTTTGGAGCTCCGCCACTGTACGTGGCTTTGTTGGGGGACGAGAGA  
CAGAGACACTTCCCGCCCCCGTCTGAATTTTTGCTTTTCGTTTTACGCCGAAGCCGCGCCGCGCTCTGATTTGTTTGT  
GTTCTTTTGTCTTTCGTTAGTTTTCTTCTGTCTTTAAGTGTTTTCGAGATCATGGGACAGACCGTAACCTACCCCTCTGAG  
TTTAACCTTGACAGCTGGGGCGCTGTCCAGCGCATTGCATCCAACAGTCTGTGGATGTCAGGAAGAGGCGCTGGATTA  
CCTTCTGTTCCGCTGAATGGCCAACCTTTCAATGTGGGATGGCCTCAGGATGGTACTTTCAATTTAAGTATTATCTCTCAG  
GTTAAGTCTAGAGTGTTTTGTCTGGTCCCCACGGACACCCGGATCAGGTCCCATATATCGTCACCTGGGAGGCATTGC  
CTATGACCCCCCTCCGTGGGTCAAACCGTTTTGTGTCTCCTAAACTTCCTCCCTTGCCGACAGCTCCCGTCTCCCGCCCCG  
GTCCTTCTGCGCAACCTCCGTCCCGATCTGCCCTTTACCCTGCCCTTACCCCTCTATAAAGTCCAAACCTCCTAAGCCC  
CAGGTTCTCCCTGATAGCGGGGACCCCTCATTGACCTTCTCACAGAGGACCCCCCGCGTACAGAGCACAAACCTCCTC  
CTTGCCAGGAAAAACGACGAAGAAGAGGCGGCCACCACTCCGAGGTTTTCCCCCTTCTCCCATGGTGTCTCGACTGC  
GGGAAGGAGAGACCTTCCCGCAGTGGACTCCACCACCTCCGAGGATTTCCACTCCGATGGGGGAGATGGCCAGCTT  
CAGTATTGGCCGTTTTCTCTTCGATTTATACAATTGAAAAATAATAACCTTCTTTTTCTGAAGATCCAGGTAAATT  
GACGGCCTTGATTGAGTCCGTCTCATCACCCACCAGCCACCTGGGACGACTGTGAGCAGTTGTTGGGGACCTGCTGA  
CCGGAGAAGAAAAGCAGCGGGTGCTCCTAGAGGCTAGAAAGGCAGTCCGGGGCAATGATGGACGCCCCACTCAGTTGCCT  
AATGAAGTCAATGCTGCTTTTTCCCTTGAACGCCCCGTTGGGATTACACCCTACAGAAGGTAGGAACCACCTAGTCCT  
CTATCGCCAGTTGCTCTTAGCGGGTCTCCAGAACGCGGGCAGAAGTCCCACCAATTTGGCCAAGGTAAAAGGGATAACCC  
AGGGACCTAATGAGTCTCCCTCAGCCTTTTTAGAGAGACTCAAAGAGGCCTATCGCAGGTACACTCCTTATGACCCTGAG  
GACCCAGGGCAAGAAACCAATGTGTCTATGTCAATCATCTGGCAGTCTGCCCGGATATCGGGCGAAAGTTAGAGCGGTT  
AGAAGGTTTAAAGAGCAAGACCTTAGGAGACTTAGTAAGGGAAGCTGAAAAGATCTTTAATAAGCGAGAAACCCCGGAAG  
AAAGAAAGGAACGTATCAAGAGAGAAACAGAGGAAAAAGAAGAACGCCGTAGGGCAGAGGATGAGCAGAGAGAGAAAGAA  
AGGGACCGCAGAAGACATAGAGAGATGAGCAAGCTCTTGCCACTGTAGTTATTGGTCAGAGACAGGATAGACAGGGGGG  
AGAGCGGAGGAGGCCCAACTTGATAAGGACCAATGCGCCTACTGCAAAGAAAAGGGACACTGGGCTAAGGACTGCCCAA  
AGAAGCCACGAGGGCCCCGAGGACTGAGGCCCCAGACCTCCCTCCTAACCTTAGGTGACTAGGGAGGTGAGGGTACAGGAG  
CCCCCCCCCTGAACCCAGGATAACCTCAAAGTCGGGGGGCAACCCGTACCTTCTTGGTAGATACTGGGGCCCCAACACTC  
CGTGCTGACCCAAAATCCTGGACCCCTAAGTGACAAGGCTGCCTGGGTCCAAGGGGCTACTGGAGGAAAGCGGTATCGCT  
GGACCACGGATCGCAAAGTACATCTAGCTACCGGTAAGGTCACCCACTCTTCTCCTCATGTACCAGACTGCCCCCTATCCT  
CTGCTAGGAAGAGACTTGCTGACTAACTAAAAGCCCCAAATCCACTTCGAGGGATCAGGAGCTCAGGTTATGGGACCAAT  
GGGACTGCCCCTGCAAGTGCTGACCTAAACATAGAAGATGAGTATCGGTACATGAGACCTCAAAGAGCCGGATGTTT  
CTCTAGGGTCCACCTGGCTTTCTGATTTTTCCCAAGTCTGGGCGGAAACCGGGGGCATGGGACTGGCAGTTCCGCCAAGCT  
CCTCTGATCATACCTCTGAAGGCAACCTCTACCCCCGTGTCCATAAAACAATACCCCATGTACAAGAAGCCAGACTGGG  
GATCAAGCCCCACATACAGAGACTGTTGGACCAGGGAATACTGGTACCCTGCCAGTCCCCCTGGAACACGCCCCCTGCTAC  
CCGTTAAGAAACCAGGGACTAATGATTATAGGCCTGTCCAGGATCTGAGAGAAGTCAACAAGCGGGTGGAAGACATCCAC  
CCCACCGTGCCCAACCTTACAACCTCTTGAGCGGGCTCCCACCGTCCCACCAAGTGGTACACTGTGCTTGATTTAAAGGA  
TGCCTTTTTCTGCCTGAGACTCCACCCACCAGTCAGCCTCTCTTCGCTTTGAGTGGAGAGATCCAGAGATGGGAATCT  
CAGGACAATTGACCTGGACCAGACTCCACAGGGTTTTCAAAAACAGTCCCACCTGTTTTGATGAGGCACTGCACAGAGAC  
CTAGCAGACTTCCGGATCCAGCACCCAGACTTGATCCTGCTACAGTACGTGGATGACTTACTGCTGGCCGCCACTTCTGA  
GCTCGACTGCCAACAAGTACTCGGGCCCTGTTACAAACCTAGGGAACCTCGGGTATCGGGCCTCGGCCAAGAAAGCCC  
AAATTTGCCAGAAACAGGTCAAGTATCTGGGGTATCTTCTAAAAGAGGGTCAGAGATGGCTGACTGAGGCCAGAAAAGAG  
ACTGTGATGGGACAGCCTACTCCGAAGACCCCTCGACAATAAGAGAGTTCTAGGGACGGCAGGCTTCTGTGCGCTCTG  
GATCCCTGGGTTTTGCAGAAATGGCAGCCCCCTTGTAACCTCTCACAAAACGGGGACTCTGTTTAATTGGGGCCCAGACC

AGCAAAAGGCCTATCAAGAAATCAAACAGGCTCTTCTAACTGCCCCAGCCCTGGGATTGCCAGATTTGACTAAGCCCTTT  
GAACTCTTTGTTGACGAGAAGCAGGGCTACGCCAAAGGCGTCCTAACGCAAAAAGCTGGGACCTTGGCGTCGGCCGGTGGC  
CTACCTGTCCAAAAGCTAGACCCAGTGGCAGCTGGGTGGCCCCCTTGCCCTACGGATGGTAGCAGCCATTGCCGTTCTGA  
CAAAAGATGCAGGCAAGCTAACCATGGGACAGCCGCTAGTCATCCTGGCCCCCATGCAGTAGAGGCACTAGTCAAGCAA  
CCCCCTGACCGCTGGCTATCCAACGCCCCGATGACCCACTATCAGGCGATGCTCCTAGATACGGACCGGGTCCAGTTCGG  
ACCGGTGGTAGCCCTAAACCCGGCTACGTTGCTCCCCCTACCGGGGAAAGAGCCTCACCATGACTGCCTCGAGATCTTGG  
CCGAGACACACGGAACCAGACCAGACCTCACGGACCAGCCCCCTCCAGACGCCGACCACACCTGGTATACAGATGGAAGC  
AGCTTCTTGCAAGAGGGACAACGTAGGGCTGGAGCAGCGGTGACCACCGAGACCGAGGTAATCTGGGCCAAGGCGTTGCC  
AGCCGGGACATCCGCCCAGCGAGCTGAACTAATAGCACTACCCAGGCCCTAAAGATGGCAGAAGGTAAGAAGCTAAATG  
TTTATACTGATAGCCGCTATGCCTTTTGCTACCGCCCATGTCCATGAAAAATATATAGGAGACGTGGGTTGCTCACCTCA  
GAAGGCAAGGAGATCAAGAACAAGGGCGAAATCTTGGCCTTACTGAAAGCTCTCTTTCTGCCCAAAAGACTCAGTATAAT  
TCACTGCCCAGGACATCAGAAAGGCAATAGTGCTGAAGCTAAAGGCAACCAATGGCGGACCAGGCAGCCCCGGAAGCAG  
CCATGGGGACTGACACAAAGGCCTCCTCACTTCTCATAGAGACCTCAACCCCGTACACTCCAGACTTCTTCCATTATACT  
GAGACAGATATAAAGAACCTACAAGAGTTGGGAGCCACATATGATAGAGAGAAAAATATTGGGTCTTGCAAGGTAAACC  
TGTGATGCCTGACCAGTTCACCTTTAAATTATTAGACTTCCTTACCAGCTCACCCACCTTAGCTATCAGAAGATGAGGG  
CACTTCTAGACAGGAAAGAAAGCCCCCTATTACATGCTAAATAAAGATAAGATCCTCCACGAGGTGGCGGAATCATGCCAA  
GCCTGTGTCCAAGTAAATGCCAGTAAGACTAAGATCAGGGCCGGAACACGAGTAAGAGGACATCGACCAGGCACCCATTG  
GAAAATTGACTTTACTGAAGTGAAGCCCGGACTGTATGGGTACAAGTATCTCCTGGTATTCTGTGGACACGTTCTCTGGCT  
GGGTAAAGCCTTCCCAACCAACATGAGACTGCCAAAATAGTGACCAAGAACTTCTGGAAGAAATATTTCCAAGGTTT  
GGAATGCCCCAAGTGTTGGGGACTGATAATGGGCCTGCCTTCGTCTCCAGGTAAGTCAGTCGGTGGCCAAGCTACTGGG  
GATTGATTGGAACTACATTGTGCTTACAGACCCCAGAGTTCAGGTGAGGTAGAAAGAATAAATAGGACAATCAAGGAGA  
CTTTGACCAATTAACGCTTGCAACTGGCACTAGAGACTGGGTACTCCTACTTCCCTTAGCCCTCTACCGAGCCCCGCAAC  
ACTCCGGGCCCCCATGGACTCACTCCGTATGAAATCCTGTATGGGGCGCCCCCGCCCCCTTGTTAATTTCCATGATCCTGA  
AATGTCAAAGTTTACTAATAGCCCCCTCTCTCCAAGCTCACTTACAGGCCCTCCAAGCAGTACAACGAGAGGTCTGGAAGC  
CACTGGCCGCTGCCTATCAGGACCAGCTGGACCAGCCAGTGATACCACACCCCTTCCGTGTGCGGACACCGTGTGGGT  
CGCCGGCACCAGACTAAGAACTTGGAACCTCGCTAGAAAGGACCCTACACCGTCTGTGACACCCCCACCGCTCTCAA  
AGTAGACGGCATCGCTGCGTGGATCCACGCGCTCACGTAAAAGCGGCGACAACCCCTCCGGCCGGAACAGCATCAGGAC  
CGACATGAAGGTCCAGCGCTCTCAAAACCCCTTAAAGATAAGATTAAACCCGTGGGGCCCCCTAATAGTCTCTGGGACTCT  
TAATAAGGGCAGGAGTATCAGTACAACATGACAGCCCTCATCAGGTCTTCAATGTTACTTGGAGAGTTACCAACTTAATG  
ACAGGACAAACAGCTAATGCTACCTCCCTCCTGGGGACAATGACCGATGCCTTTCTTAACTGTACTTTGACTTGTGCGA  
TTTAATAGGGGACGACTGGGATGAGACTGGACTCGGGTGTGCGACTCCCGGGGGAAGAAAAAGGGCAAGAACATTTGACT  
TCTATGTTTGGCCCCGGGCATACTGTACCAACAGGGTGTAGAGGGCCGAGAGAGGGCTACTGTGGCAAATGGGGCTGTGAG  
ACCACTGGACAGGCATACTGGAAGCCATCATCATCATGGGACCTAATTTCCCTTAAGCGAGGAAACACCCCTCGGAATCA  
GGGCCCCGTGTTATGATTCTCAGCGGTCTCCAGTGACATCAAGGGCGCCACACCGGGGGTTCGATGCAATCCCCTAGTCC  
TGAAATTCAGTGACGCGGGCAAAAAGGCCAGCTGAGATGGCCCCAAAGTATGGGGACTAAGACTGTACCGATCCACAGGG  
ACCGACCCGGTGACCCGTTCTCTTTGACCCGCCAGGTCTCAATATAGGGCCCCGCGTCCCCATTGGGCCTAATCCCGT  
GATCACTGACCAGTTACCCCCCTCCCGACCCGTGCAGATCATGCTCCCCAGGCCTCCTCAGCCTCCTCCTCCAGGCGCAG  
CCTCTATAGTCCCTGAGACTGCCCCACCTTCTCAACAACCTGGGACGGGAGACAGGCTGCTAAACCTGGTAAATAGAGCC  
TACCAAGCTCTCAACCTCACCAGTCCTGACAAAACCAAGAGTGCTGGTTGTGTCTGGTAGCGGGACCCCCCTACTACGA  
AGGGGTTGCCGTCTAGGTACTTATTCCAACCATACTCTGCCCCAGCTAACTGCTCCGTGGCCTCCCAACACAAGCTGA  
CCCTGTCCGAAGTGACCGGACAGGGACTCTGCGTAGGAGCAGTTCCCAAAACCCATCAGGCCCTGTGTAATACCACCCAG  
AAGACGAGCGACGGGTCTACTATCTGGCTGCTCCCGCCGGGACCATTTGGGCTTGCAACACCGGGCTCACTCCCTGCCT  
ATCTACCACTGTACTCGACCTCACCACCGATTACTGTGTCTCTGGTTGAGCTCTGGCCAAAGGTGACCTACCACTCCCCTG  
GTTATGTTTATGGCCAGTTTGAGAAAAAACC AAATATAAAAAGAGAGCCGGTGTCAATTAATCTGGCCCTGCTGTTGGGA  
GGACTTACTATGGCGGCATAGCTGCAGGAGTAGGAACCGGGACTACAGCCCTAGTGGCCACCAACAATTCGAGCAGCT  
CCAGGCAGCCATACATACAGACCTTGGGGCTTTAAAAAAGTCAGTCAGTGCCCTAGAAAAGTCTCTGACCTCGTTGTCTG  
AGGTGGTCTACAGAACCGGAGGGGATTAGATCTACTGTTCTTAAAGAAGGAGGATTATGTGCTGCCCTAAAAGAAGAA  
TGCTGTTTCTACGCGGACCACACTGGCGTAGTAAGAGATAGCATGGCAAAGCTAAGAAAAAGGTTGAACCAGAGACAAAA  
ATTGTTTGAATCAGGACAAGGGTGGTTTGAAGGACTGTTTAAACAGGTCCCCATGGTTACGACCTTAATATCCACCATTA  
TGGGCCCCCTTGATAATACTTTTATTAATCCTACTCTTCGGACCCCTGTATTCTCAACCGCTTGGTCCAGTTTGTAAAAGAC  
AGAATTTGCGTAGTGACGGCCCTGGTTTGGACCAACAGTATACCAACTCAAATCAATAGATCCAGAAAAAGTGAATC  
ACGTGAATAAAAAGATTTTATTAGTTTCCAGAAAGAGGGGGGAATGAAAGACCCACCATCAGGCTTAGCAAGCTAGCTG  
CAGTAACGCCATTTTGAAGGCATGAAAAAGTACCAGAGCTGAGTTCTCAAAAGTTACAAGAAAGTTAGTTAAAGATTA  
ACAGTTAAAGATTAAGGCTGAATAATACTGAGACAGGGGCCAAATATCGGTGGTCAAGCACCTGGGCCCCGGCTCAGGGC  
CAAGAACAGATGGCTCTCAGACGTGAGTGTAGCAGAACTAGCTTCACTGATTTAGAAAAATAGAGGTGCACAGTGCTCT  
GGCCACTCCTTAAACCTGTGTGTCTGCCAATGTTCTGACCAGGTGTGTGCCATTGTTGAACCTTCATTAGACCTTTCC  
TCGTACCCCTCCCATACCCATTTCTTGAAAATAGACATTGTTTAGAACTAAAAAGTCCCACCTCAGTTTCCCCAAATGAC

CGAGAAATACCCCAAGCCTTATTTCGAACTAACCAACCAGCTCGCTTCTCGCTTCTGTAACCGCGCTTTTTTGCTCCCCAGC  
CCCAGCCCTATAAAAAGGGTAAAACTCCACACTCGGCGCGCCAGTCTCTCCGATAGACTGCGTCGCCCCGGGTACCCGTGT  
TCCCAATAAAGCCTCTTGCTGTTTGCATCCGAATCGTGGTCTCGCTGGTCTCTTGAAGGGTCTCCTCAGATTGATTGACT  
ACCCACGTGGGGGTCTTTCA

>Pmv22

TGAAAGACCCCACCATCAGGCTTAGCAAGCTAGCTGCAGTAACGCCATTTTGCAAGGCATGAAAAAGTACCAGAGCTGAG  
TTCTCAAAAGTTACAAGAAAGTTCAAGTTAAAGATTAAACAGTTAAAGATTAAAGGCTGAATAATACTGGGACAGGGGCCAAA  
TATCGGTGGTCAAGCACCTGGGCCCCGGCTCAGGGCCAAGAACAGATGGCTCTCAGACGTCAGTGTTAGCAGAACTAGCT  
TCACTGATTTAGAAAAATAGAGGTGCACAGTGTCTTGCCCACTCCTTGAACCTGTGTGTCCGCCAATGTTCTGACCAGGT  
GTGTGCCCATTGTTGAACCTTCATTAGACCTTTTCTCGTACCCTCCCATACCCATTTCTTGAAAATAGACATTGTTTGA  
GAACTAAAAAGTCCCACCTCAGTTTCCCCAAATGACCGAGAAATACCCCAAGCCTTATTTCGAACTAACCAACCAGCTCGC  
TTCTCGCTTCTGTAACCGCGCTTTTTTGCTCCCCAGCCCCAGCCCTATAAAAAGGGTAAAACTCCACACTCGGCGCGCCA  
GTCCTCCGATAGACTGCGTCGCCCCGGGTACCCGTGTTCTCAATAAAGCCTCTTGCTGTTTGCATCCGAATCGTGGTCTCG  
CTGGTCTCTTGAAGGGTCTCCTCAGATTGATTGACTACCCACCTCGGGGGTCTTTTCATTGAGAGTTCCACCGAGATTG  
GAGACCCCTGCCCAGGGACCAACGACCCCCCGCCGGGAGGTAAGCTGGCCAGCGGTGCTTTCTGTGTCTGTCTCTGTCTTC  
GTGCGTGTGTTGTGCCGGCATCCAATGTTTGCCTGTGCTGTACTAGTTAGCTAACTAGATCTGTATCTGGCGGTTCCG  
CGGAAGAACTGACGAGTTCGTATTCCCGGCCGCGAGCCCTGGGAGACGTCCAGCGGCCCTCGGGGGCCCCGTTTTGTGGCC  
CATTCTGTATCAGTTAACCTACCCGAGTCGGACTTTTTGGAGCTCCGCCACTGTACGTGGCTTTGTTGGGGGACGAGAGA  
CAGAGACACTTCCCGCCCCCGTCTGAATTTTTGCTTTTCGGTTTTACGCCGAAGCCGCGCCGCGCTCTGATTTGTTTGT  
GTTCTTTTGTCTTCTGTTAGTTTTCTTCTGTCTTTAAGTGTTTTCGAGATCATGGGACAGACCGTAACCTACCCCTCTGAG  
TTTAACCTTGACAGCTGGGGAGATGTCCAGCGCATTGCATCCAACAGTCTGTGGATGTGAGGAAGAGGCGCTGGATTA  
CCTTCTGTTCCGCTGAATGGCCAACCTTTCAATGTGGGATGGCCTCAGGATGGTACTTTCAATTTAAGTATTATCTCTCAG  
GTTAAGTCTAGAGTGTTTTGTCTGGTCCCCACGGACACCCGGATCAGGTCCCATATATCGTCACCTGGGAGGCATTGCT  
CTATGACCCCCCTCCGTGGGTCAAACCGTTTTGTGTCTCCTAAACTTCCTCCCTTGCCGACAGCTCCCGTCTCTCCGCCCCG  
GTCCTTCTGCGCAACCTCCGTCCCGATCTGCCCTTTACCCTGCCCTTACCCCTCTATAAAGTCCAAACCTCCTAAGCCC  
CAGGTTCTCCCTGATAGCGGGGACCCCTCATTGACCTTCTCACAGAGGACCCCCCGCGTACAGAGCACAAACCTCCTC  
CTCTGCCAGGAGAACGACGAGAGAGGCGGCCACCACTCCGAGGTTTTCCCCCTTCTCCATGGTGTCTCGACTGC  
GGGAAGGAGAGACCTCCCGCAGTGGACTCCACCACCTCCGAGGATTTCCACTCCGATGGGGGAGATGGCCAGCTT  
CAGTATTGGCCGTTTTCTCTCGGATTTATACAATTGAAAAATAATAACCTTCTTTTTCTGAAGATCCAGGTAAATT  
GACGGCCTTGATTGAGTCCGTCTCATCACCCACCAGCCACCTGGGACGACTGTGAGCAGTTGTTGGGGACCTGCTGA  
CCGGAGAAGAAAAGCAGCGGGTGCTCCTAGAGGCTAGAAAGGCAGTCCGGGGCAATGATGGACGCCCCACTCAGTTGCCT  
AATGAAGTCAATGCTGCTTTTTCCCTTGAACGCCCCGGTTGGGATTACACCCTACAGAAGGTAGGAACCACCTAGTCT  
CTATCGCCAGTTGCTCTTAGCGGGTCTCCAGAACGCGGGCAGAAGTCCCACCAATTTGGCCAAGGTAAAAGGGATAACCC  
AGGGACCTAATGAGTCTCCCTCAGCCTTTTTAGAGAGACTCAAAGAGGCCTATCGCAGGTACACTCCTTATGACCCTGAG  
GACCCAGGGCAAGAAACCAATGTGTCTATGTCAATCATCTGGCAGTCTGCCCGGATATCGGGCGAAAGTTAGAGCGGTT  
AGAAGATTTAAAGAGCAAGACCTTAGGAGACTTAGTGAGGGAAGCTGAAAAGATCTTTAATAAGCGAGAAACCCCGGAAG  
AAAGAGAGGAACGTATCAAGAGAGAAACAGAGGAAAAAGAAGAACGCCGTAGGGCAGAGGATGAGCAGAGAGAGAAAGAA  
AGGGACCGCAGAAAGACATAGAGAGATGAGCAAGCTCTTGCCACTGTAGTTATTGGTCAGAGACAGGATAGACAGGGGGG  
AGAGCGGAGGAGGCCCCAAGTTGATAAGGACCAATGCGCCTACTGCAAAGAAAAGGGACACTGGGCTAAGGACTGCCCAA  
AGAAGCCACGAGGGCCCCGAGGACTGAGGCCCCAGACCTCCCTCCTAACCTTAGGTGACTAGGGAGGTGAGGGTACAGGAG  
CCCCCCCCGAACCCAGGATAACCTCAAAGTCGGGGGGCAACCCGTACCTTCTGGTAGATACTGGGGCCCAACACTCC  
GTGCTGACCCAAAATCCTGGACCCCTAAGTGACAAGGCTGCCTGGGTCCAAGGGGCTACTGGAGGAAAGCGGTATCGCTG  
GACCACGGATCGCAAAGTACATCTAGCTACCGGTAAGGTACCCACTCTTCTCCTCATGTACCAGACTGCCCCCTATCCTC  
TGCTAGGAAGAGACTTGCTGACTAACTAAAAGCCCAAATCCACTTCGAGGGATCAGGAGCTCAGGTTATGGGACCAATG  
GGACTGCCCCTGCAAGTGCTGACCCTAAACATAGAAGATGAGTATCGGTACATGAGACCTCAAAGAGCCGGATGTTTC  
TCTAGGGTCCACCTGGCTTTCTGATTTTTCCCGAGGTCTGGGCGGAAACCGGAGGCATGGGACTGGCAGTTTCGCCAAGCTC  
CTCTGATCATACCTCTGAAGGCAACCTCTACCCCGTGTCCATAAAACAATACCCCATGTGACAAGAAGCCAGACTGGGG  
ATCAAGCCCCACATACAGAGACTGTTGGACCAGGGAATACTGGTACCCTGCCAGTCCCCCTGGAACACGCCCCCTGCTACC  
CGTTAAGAAACCAGGGACTAATGATTATAGGCCTGTCCAGGATCTGAGAGAAGTCAACAAGCGGGTGGAAGACATCCACC  
CCACCGTGCCCCAACCTTACAACCTCTTGAGCGGGCTCCACCGTCCACCAAGTGGTACACTGTGCTTGATTTAAAGGAT  
GCCTTTTTCTGCCTGAGACTCCACCCACCAGTCAGCCTCTCTTCGCCTTTGAGTGGAGAGATCCAGAGATGGGAATCTC  
AGGACAATTGACCTGGACCAGACTCCACAGGGTTTCAAAAACAGTCCCACCCTGTTTGATGAGGCACTGCACAGAGACC  
TAGCAGACTTCCGGATCCAGCACCCAGACTTGATCCTGCTACAGTACGTGGATGACTTACTGCTGGCCGCCACTTCTGAG  
CTCGACTGCCAACAAGGTACTCGGGCCCTGTTACAAACCTAGGGAACCTCGGGTATCGGGCCTCGGCCAAGAAAGCCCA  
AATTTGCCAGAAACAGGTCAAGTATCTGGGGTATCTTCTAAAAGAGGGTCAGAGATGGCTGACTGAGGCCAGAAAAGAGA  
CTGTGATGGGGCAGCCTACTCCGAAGACCCCTCGACAATAAGGGAGTTCTAGGGACGGCAGGCTTCTGTGCGCTCTGG  
ATCCCTGGGTTTGCAGAAATGGCAGCCCCCTTGTAACCTCTCACAAAACGGGGACTCTGTTTAATTGGGGCCAGACCA

GCAAAAGGCCTATCAAGAAATCAAACAGGCTCTTCTAACTGCCCCAGCCCTGGGATTGCCAGATTTGACTAAGCCCTTTG  
AACTCTTTGTTGACGAGAAGCAGGGCTACGCCAAAGGCGTCCTAACGCAAAAAGCTGGGACCTTGGCGTCGGCCGGTGGCC  
TACCTGTCCAAAAGCTAGACCCAGTGGCAGCTGGGTGGCCCCCTTGCCCTACGGATGGTAGCAGCCATTGCCGTTCTGAC  
AAAAGATGCAGGCAAGCTAACCATGGGACAGCCGCTAGTCATCCTGGCCCCCATGCAGTAGAGGCCTAGTCAAGCAAC  
CCCCTGACCGCTGGCTATCCAACGCCCGCATGACCCACTATCAGGCGATGCTCCTAGATACGGACCGGGTCCAGTTCGGA  
CCGGTGGTAGCCCTAAACCCGGCTACGTTGCTCCCCCTACCGGGGAAAGAGCCTCACCATGACTGCCTCGAGATCTTGGC  
CGAGACACACGGAACCAGACCAGACCTCACGGACCAGCCCCCTCCCAGACGCCGACCACACCTGGTATACAGATGGAAGCA  
GCTTCCTGCAAGAGGGACAACGTAGGGCTGGAGCAGCGGTGACCACCGAGACCGAGGTAATCTGGGCCAAGGCGTTGCCA  
GCCGGACATCCGCCAGCGAGCTGAACCTAATAGCACTACCCAGGCCCTAAAGATGGCAGAAGGTAAGAAGCTAAATGT  
TTATACTGATAGCCGCTATGCCTTTGCTACCGCCCATGTCCATGGAGAAATATATAGGAGACGTGGGTTGCTCACCTCAG  
AAGGCAAGGAGATCAAGAACAAGGGCGAAATCTTGGCCTTACTGAAAGCTCTCTTTCTGCCAAAAGACTCAGTATAATT  
CACTGCCCAGGACATCAGAAAGGCAATAGTGCTGAAGCTAAAGGCAACCGAATGGCGGACCAGGCAGCCCGGAAGCAGC  
CATGGGGACTGACACAAAGGCCTCCTCACTTCTCATAGAGACCTCAACCCCGTACACTCCAGACTTCTTCCATTATACTG  
AGACAGATATAAAGAACCTACAAGAGTTGGGAGCCACATATGATAGAGAGAAAAAATATTGGGTCTTGCAAGGTAAACCT  
GTGATGCCTGACCAGTTCACCTTTGAATTATTAGACTTCCTTACCAGCTCACCACCTTAGCTATCAGAAGATGAGGGC  
ACTTCTAGACAGGAAAGAAAGCCCTATTACATGCTAAATAAAGATAAGATCCTCCACGAGGTGGCGGAATCATGCCAAG  
CCTGTGTCCAAGTAAATGCCAGTAAGACTAAGATCAGGGCCGGAACACGAGTAAGAGGACATCGACCAGGCACCCATTGG  
GAAATTGACTTTACTGAAGTGAAGCCCGGACTGTATGGGTACAAGTATCTCCTGGTATTCTGTGGACACGTTCTCTGGCTG  
GGTTGAAGCCTTCCCAACCAACATGAGACTGCCAAAATAGTGACCAAGAACTTCTGGAAGAAATATTTCCAAGGTTTG  
GAATGCCCCAAGTGTTGGGGACTGATAATGGGCCTGCCTTCGTCTCCAGGTAAGTCAGTCGGTGGCCAAGCTACTGGGG  
ATTGATTGGAACTACATTGTGCTTACAGACCCAGAGTTTCAGGTCAGGTAGAAAGAATGAATAGGACAATCAAGGAGAC  
TTTGACCAAATTAACGCTTGCAACTGGCACTAGAGACTGGGTACTCCTACTTCCCTTAGCCCTCTACCGAGCCCGCAACA  
CTCCGGGCCCCCATGGACTCACTCCGTATGAAATCCTGTATGGGGCGCCCCCGCCCCCTTGTTAATTTCCATGATCCTGAA  
ATGTCAAAGTTTACTAATAGCCCCCTCTCTCCAAGCTCACTTACAGGCCCTCCAAGCAGTACAACGAGAGGCCTGGAAGCC  
ACTGGCCGCTGCCTATCAGGACCAGCTGGACCAGCCAGTGATACCACACCCCTTCCGTGTGGCGACACCGTGTGGGTAC  
GCCGGCACCAGACTAAGAACTTGGAACCTCGCTGGAAGGACCCTACACCGTCTGTGACCACCCCCACCGCTCTCAAA  
GTAGACGGCATCGCTGCGTGGATCCACGCCCTTAAAGTAAAGTCAAGTAAACCCCTCCGGCCGGAACAGCATCAGGACC  
GACATGGAAGGTCCAGCGTTCTCAAAATCCCTTAAAGTAAAGTCAAGTAAACCCGTGGGGCCCCCTGATAATCTGGGGACTCTT  
AATAAGGGCAGGAGTATCAGTACAACATGACAGCCCTCATCAGGTCTTCAATGTTACTTGGAGAGTTACCAACTTAATGA  
CAGGACAAACAGCTAATGCTACCTCCCTCCTGGGGACAATGACCGATGCCTTTTCTAAACTGTACTTTGACTTGTGCGAT  
TTAATAGGGGACGACTGGGATGAGACTGGACTCGGGTGTGCACTCCCGGGGAAGAAAAAGGGCAAGAACATTTGACTT  
CTATGTTTGGCCCGGCATACTGTACCAACAGGGTGTGGAGGGCCGAGAGAGGGCTACTGTGGCAAATGGGGCTGTGAGA  
CCACTGGACAGGCATACTGGAAGCCATCATCATCATGGGACCTAATTTCCCTTAAAGCGAGGAAACACCCCTCGGAATCAG  
GGCCCTGTTATGATTCTCAGCGGTCTCCAGTGACATCAAGGGCGCCACACCGGGGGGTGATGCAATCCCTTAGTCCT  
GGAATTCAGTGACGCGGGCAAAAAGGCCAGCTGGGATGGCCCCAAAGTATGGGGACTAAGACTGTACCGATCCACAGGGA  
CCGACCCGGTGACCCGGTTCTCTTTGACCCGCCAGGTCTCAATATAGGGCCCCGCGTCCCCATTGGGCCTAATCCCGTG  
ATCACTGACCAGTTACCCCCCTCCCGACCCGTGCAGATCATGCTCCCCAGGCCTCCTCAGCCTCCTCCTCCAGGCGCAGC  
CTCTATAGTCCCTGAGACTGCCCCACCTTCTCAACAACCTGGGACGGGAGACAGGCTGCTAAACCTGGTAGATGGAGCCT  
ACCAAGCTCTCAACCTCACCAGTCCTGACAAAACCCAAGAGTGCTGGTTGTGTCTGGTAGCGGGACCCCCCTACTACGAA  
GGGGTTGCCGTCTAGGTACTTATTCCAACCATACCTCTGCCCCAGCTAACTGCTCCGTGGCCTCCCAACACAAGCTGAC  
CCTGTCCGAAGTGACCGGACAGGGACTCTGCGTAGGAGCAGTTCCCAAAACCCATCAGGCCCTGTGTAATACCACCCAGA  
AGACGAGCGACGGTCTACTATCTGGCTGCTCCCGCCGGGACCATTTGGGCTTGCAACACCGGGCTCACTCCCTGCCTA  
TCTACCACTGTACTCGACCTCACCACCGATTACTGTGTCTGGTTGAGCTCTGGCCAAAGGTGACCTACCACTCCCTGG  
TTATGTTTATGGCCAGTTTGAGAGAAAAACCAATATAAAAGAGAGCCGGTGTCAATTAATCTGGCCCTGCTGTTGGGAG  
GACTTACTATGGGCGGCATAGCTGCAGGAGTAGGAACCGGACTACAGCCCTAGTGGCCACCAACAATTCGAGCAGCTC  
CAGGCAGCCATACATACAGACCTTGGGGCTTTAGAAAAGTCAGTCAGTGCCCTAGAAAAGTCTCTGACCTCGTTGTCTGA  
GGTGGTCTTACAGAACCGGAGGGGATTAGATCTACTGTTCTTAAAGAAGGAGGATTATGTGCTGCCCTAAAAGAAGAAT  
GCTGTTTTCTACGCGGACCACACTGGCGTAGTAAGAGATAGCATGGCAAAGCTAAGAGAAAAGGTTGAACCAGAGACAAAA  
TTGTTCAAATCAGGACAAGGGTGGTTTTGAGGGACTGTTTAAAGGTCCCCATGGTTTACGACCTTAATATCCACCATTAT  
GGGCCCCCTTGATAATACTTTTTATTAATCCTACTCTTCGGACCCTGTATTCTCAACCGCTTGGTCCAGTTTGTAAAAGACA  
GAATTTCCGTAGTGCAGGCCCTGGTTTTGACCCAACAGTATCACCAACTCAAATCAATAGATCCAGAAGAAGTGGAATCA  
CGTGAATAAAAGATTTTTATTAGTTTTCCAGAAAGAGGGGGGAATGAAAGACCCACCATCAGGCTTAGCAAGCTAGCTGC  
AGTAACGCCATTTTGCAAGGCATGAAAAAGTACCAGAGCTGAGTTCTCAAAGTTACAAGAAAGTTAGTTAAAGATTAA  
CAGTTAAAGATTAAAGGCTGAATAATACTGGGACAGGGGCCAAATATCGGTGGTCAAGCACCTGGGCCCCGGCTCAGGGCC  
AAGAACAGATGGCTCTCAGACGTGAGTGTAGCAGAACTAGCTTCACTGATTTAGAAAAATAGAGGTGCACAGTGCTCTG  
GCCACTCCTTGAACCTGTGTGTCGCAATGTTCTGACCAGGTGTGTGCCATTGTTGAACCTTCATTAGACCCCTTCTCT  
CGTACCCCTCCCATACCCATTTCTTGAAAATAGACATTGTTTAGAACTAAAAAGTCCCACCTCAGTTTCCCCAAATGACC

GAGAAATACCCCAAGCCTTATTGAACTAACCAACCAGCTCGCTTCTCGCTTCTGTAACCGCGCTTTTTGCTCCCCAGCC  
CCAGCCCTATAAAAAGGGTAAAACTCCACACTCGGCGCGCCAGTCTCCGATAGACTGCGTCGCCCCGGGTACCCGTGTT  
CTCAATAAAGCCTCTTGCTGTTTGCATCCGAATCGTGGTCTCGCTGGTCCTTGAGAGGGTCTCCTCAGATTGATTGACTA  
CCCACCTCGGGGGTCTTTCA

>Pmv23

TGAAAGACCCCACCATCAGGCTTAGCAAGCTAGCTGCAGTAACGCCATTTTGCAAGGCATAAAAAAGTACCAGAGCTGAG  
TTCTCAAAAGTTACAAGAAAGTTCAAGTTAAAGATTAAACAGTTAAAAATTAAGGCTGAATAATACTGGGACAGGGGCCAAA  
TATCGGTGGTCAAGCACCTGGGCCCCGGCTCAGGGCCAAGAACAGATGGCTCTCAGACGTCAGTGTTAGCAGAACTAGCT  
TCACTGATTTAGAAAAATAGAGGTGCACAGAGCTCTGGCCACTCCTTGAACCTGTGTGTCTGCCAATGTTCTGACCAGGT  
GTGTGCCCATTGTTGAACCTTCATTAGACCTCTCCTCGTACCCTCCCATACCCATTTCTTAAAAATAGACATTGTTTAA  
GAACTAAAAAGTCCCACCTCAGTTTCCCCAAATGACCGAGAAATACCCCAAGCCTTATTGAACTAACCAACCAGCTCGC  
TTCTCGCTTCTGTAACCGCGCTTTTTGCTCCCCAGCCCCAGCCCTATAAAAAAGATAAAAACTCCACACTCGGCGCGCCA  
GTCCTCCGATAGACTGCGTCGCCCCGGGTACCCGTGTTCCCAATAAAGCCTCTTGCTGTTTGCATCCGAATCGTGGTCTCG  
CTGGTCCTTGAGAGGGTCTCCTCAGATTGATTGACTACCCACGTCGGGGGTCTTTCATTTGGAGGTCCCACCGAGATTTG  
GAGACCCCTGCCCAGGGACACCGACCCCCCGCGGGAGGTAAGCTGGCCAGCGGTCTGTTTCGTGTCTGTCTCTGTCTT  
CGTGCGTGTTTTGTGCCGGCATCCAATGTTTGCGCCTGCGTCTGTACTAGTTAGCTAACTAGATCTGTATCTGGCGGTTCC  
GCGGAAGAACTGACGAGTTTCGTATTCCCGGCCGACGCCCTGGGAGACGTCACGCGGCTCGGGGGCCCGTTTTGTGGC  
CCATTCTGTATCAGTTAACCTACCCGAGTCGGACTTTTTGGAGCTCCGCCACTGTACGTGGCTTTGTTGGGGGACGAGAA  
ACAGAGACACTTCCCGCCCCCGTCTGAATTTTTGCTTTTCGGTTTTACGCCGAAGCCGCGCCGCGCTCTGATTTGTTTGT  
TGTTCTTTTTGTTCTTCGTTAGTTTTCTTCTGTCTTTAAGTGTTTTCGAGATCATGGGACAGACCGTAACTACCCCTCTGA  
GTTTAAACCTTGACGACTGGGGAGATGTCCAGCGCATTGCATCCAACAGTCTGTGGATGTGAGGAAGAGGCGCTGGATT  
ACCTTCTGTTCCGCTGAATGGCCAACTTTCAATGTGGGATGGCCTCAGGATGGTACTTTCAATTTAAGTATTATCTCTCA  
GGTTAAGTCTAGAGTGTTTTGTCTGGTCCCCACGGACACCCGGATCAGGTCCCATATATCGTCACCTGGGAGGCACTTG  
CCTATGACCCCCCTCCGTGGGTCAAACCGTTTGTGTCTCCTAAACTCCCTCCCTTGCCGACAGCTCCCGTCTCCCGCCC  
GGTCCTTCTGCGCAACCTCCGTCCCGATCTGCCCTTTACCCTGCCCTTACCCCTCTATAAAGTCCAAACCTCCTAAGCC  
CCAGGTTCTCCCTGATAGCGGCGGACCCCTCATTGACCTTCTCACAGAGGACCCCCCGCCGTACAGAGCACAAACCTCCT  
CCTCTGACAGGAGAGAACGACGAAGAAGAGCGGCCACCACTCCGAGGTTTTCCCCCTTCTCCCATGGTGTCTCGACTG  
CGGGGAAGGAGAGACCTCCCGCAGTGGACTCCACCACTCCGAGGATTTCCACTCCGCATGGGGGGAGATGGCCAGCT  
TCAGTATTGGCCGTTTTCTCTTCGATTATACAATTGAAAAATAATAACCCTTCTTTTTCTGAAGATCCAGGTAAAT  
TGACGGCCTTGATTGAGTCCGTCTCATACCCACCAGCCACCTGGGACGACTGTGAGCAGTTGTTGGGGACCTGCTG  
ACCGGAGAAGAAAAGCAGCGGGTGCTCCTAGAGGCTAGAAAGGCAGTCCGGGGCGATGATGGACGCCCCACTCAGTTGCC  
TAATGAAGTCAATGCTGCTTTTTCCCCCTGAACGCCCCGGTTGGGATTACACCCTACAGAAGGTAGGAACCACTAGTCC  
TCTATCGCCAGTTGCTCTTAGCGGGTCTCCAGAACGCGGGCAGAAGTCCCACCAATTTGGCCAAGGTAAAAGGGATAACC  
CAGGGACCTAATGAGTCTCCCTCAGCCTTTTTAGAGAGACTCAAAGAGGCCTATCGCAGGTACACTCCTTATGACCCTGA  
GGACCCAGGGCAAGAAACCAATGTGTCTATGTCAATCATCTGGCAGTCTGCCCCGGATATCGGGCGAAAGTTAGAGCGGT  
TAGAAGATTTAAAGAGCAAGACCTTAGGAGACTTAGTGAGGGAAGCTGAAAAGATCTTTAATAAGCGAGAAACCCCGGAA  
GAAAGAGAGGAACGTATCAAGAGAGAAACAGAGGAAAAAGAAGAACGCCGTAGGGCAGAGGATGAGCAGAGAGAGAAAGA  
AAGGGACCGCAGAAGACATAGAGAGATGAGCAAGCTCTTGCCACTGTAGTTATTGGTCAGAGACAGGATAGACAGGGGG  
GAGAGCGGAGGAGGCCCAACTTGATAAGGACCAATGCGCCTACTGCAAAGAAAAGGGACACTGGGCTAAGGACTGCCCA  
AAAAAGCCACGAGGGCCCCGAGGACTGAGGCCCCAGACCTCCCTCCTAACCTTAGGTGACTAGGGAGGTGAGGGTCAGGA  
GCCCCCCCCCTGAACCCAGGATAACCTCAAAGTCGGGGGGCAACCCGTCACCTTCTTGGTAGATACTGGGGCCCAACACT  
CCGTGCTGACCCAAAATCCTGGACCCCTAAGTGATAAGGCTGCCTGGGTCCAAGGGGCTACTGGAGGAAAGCGGTATCGC  
TGGACCACGGATCGCAAAGTACATCTAGCTACCGGTAAGGTACCCACTCTTCTCCTCATGTACCAGACTGCCCCATCC  
TCTGCTAGGAAGAGACTTGCTGACTAACTAAAAGCTCAAATCCACTTCGAGGGATCAGGAGCTCAGGTTATGGGACCAA  
TGGGACTGCCCCTGCAAGTGCTGACCCTAAACATAGAAGATGAGTATCGGTACATGAGACCTCAAAGAGCCGGATGTT  
TCTCTAGGGCCCACCTGGCTTTCTGATTTTTCCCGAGGTCTGGGCGGAAACCGGGGGCATGGGACTGGCAGTTTCGCCAAGC  
TCCTCTGATCATACCTCTGAAGGCAACCTCTACCCCCGTGTCCATAAAACAATACCCCATGTACAAGAAGCCAGACTGG  
GGATCAAGCCCCACATACAGAGACTGTTGGACCAGGGAATACTGGTACCCTGCCAGTCCCCCTGGAACACGCCCCCTGCTA  
CCCGTTAAGAAACCAGGGACTAATGATTATAGGCCTGTCCAGGATCTGAGAGAAGTCAACAAGCGGGTGGAAGACATCCA  
CCCCACCGTGCCCCAACCTTACAACCTCTTGAGCGGGCTCCCACCGTCCCACCACTGGTACACTGTGCTTGATTTAAAGG  
ATGCCTTTTTCTGCCTGAGACTCCACCCACCAGTCAGCCTCTCTTCGCCTTTGAGTGGAGAGATCCAGAGATGGGAATC  
TCAGGACAATTGACCTGGACCAGACTCCCACAGGGTTTCAAAAACAGTCCCACCCTGTTTGATGAGGCACTGCACAGAGA  
CCTAGCAGACTTCAGATCCAGCACCCAGACTTGATCCTGCTACAGTACGTGGATGACTTACTGCTGGCCGCCACTTCTG  
AGCTAGACTGCCAACAAGGTAAGTCTCGGGCCCTGTTACAAACCTAGGGAACCTCGGGTATCGGGCCTCGGCCAAGAAAGCC  
CAAATTTGCCAGAAACAGGTCAAGTATCTGGGGTATCTTCTAAAAGAGGGTCAGAGATGGCTGACTGAGGCCAGAAAAGA  
GACTGTGATGGGGCAGCCTACTCCGAAGACCCCTCGACAATAAGGGAGTTCTAGGGACGGCAGGCTTCTGTGCGCTCT  
GGATCCCTGGGTTTGCAGAAATGGCAGCCCCCTTGTAACCTCTCACAAAACGGGGACTCTGTTTAATTGGGGCCAGAC

CAGCAAAAGGCCTATCAAGAAATCAAACAGGCTCTTCTAACTGCCCCAGCCCTGAGATTGCCAGATTTGACTAAGCCCTT  
TGAACCTCTTTGTGCGACGAGAAGCAGGGCTACGCCAAAGGCGTCCTAACGCAAAAAGCTGGGACCTTGGCGTCGGCCGGTGG  
TCTACCTGTCCAAAAGCTAGACCCAGTGGCAGCTGGGTGGCCCCCTTGCCCTACGGATGGTAGCAGCCATTGCCGTTCTG  
ACAAAAGATGCAGGCAAGCTAACCATGGGACAGCCGCTAGTCATCCTGGCCCCCATGCAGTAGAGGCACCTAGTCAAGCA  
ACCCCTGACCGCTGGCTATCCAACGCCCGCATGACCCACTATCAGGCGATGCTCCTAGATACGGACCGGGTCCAGTTTCG  
GACCGGTGGTAGCCCTAAACCCGGCTACGTTGCTCCCCCTACCGGGGAAAGAGCCTCACCATGACTGCCTCGAGATCTTG  
GCCGAGACACACGGAACCAGACCAGACCTCACGGACCAGCCCCCTCCAGACGCCGACCACACCTGGTATACAGATGGAAG  
CAGCTTCCTGCAAGAGGGACAACGTAGGGCTGGAGCAGCGGTGACCACCGAGACCGAGGTAATCTGGGCCAAGGCGTTGC  
CAGCCGGGACATCCGCCAGCGAGCTGAACCTAATAGCACTACCCAGGCCCTAAAGATGGCAGAAGGTAAGAAGCTAAAT  
GTTTATACTGATAGCCGCTATGCCTTTGCTACCGCCCATGTCCATGGAAAAATATATAGGAGACGTGGGTTGCTCACCTC  
AGAAGGCAAGGAGATCAAGAACAAGGGCGAAATCTTGGCCTTACTGAAAGCTCTCTTTCTGCCAAAAGACTCAGTATAA  
TTCCTGCCCAGGACATCAGAAAGGCAATAGTGCTGAAGCTAAAGGCAACCGAATGGCGGACCAGGCAGCCCGGAAGCA  
GCCATGGGGACTGACACAAAGGCCTCCTCACTTCTCATAGAGACCTCAACCCCGTACACTCCAGACTTCTTCCATTATAC  
TGAGACAGATATAAAGAACCTACAAGAGTTGGGAGCCACATATGATAGAGAGAAAAAATATTGGGTCTGCAAGGTAAAC  
CTGTGATGCCTGACCAGTTCACCTTTGAATTATTAGACTTCCTTACCAGCTCACCACCTTAGCTATCAGAAGATGAGG  
GCACCTTCTAGACAGGAAAGAAAGCCCTATTACATGCTAAATAAAGATAAGATCCTCCACGAGGTGGCGGAATCATGCCA  
AGCCTGTGTCCAAGTAAATGCCAGTAAGACTAAGATCAGGGCCGGAACACGAGTAAGAGGACATCGACCAGGCACCCATT  
GGAAAATTGACTTTACTGAAGTAAAGCCCGGACTGTATGGGTACAAGTATCTCCTGGTATTCTGTGGACACGTTCTCTGGC  
TGGGTTGAAGCCTTCCCAACCAACATGAACTGCCAAAATAGTGACCAAGAACTTCTGGAAAAAATATTTCCAAGGTT  
TAGAATGCCCCAAGTGTTGGGGACTGATAATGGGCCTGCCTTCGTCTCCAGGTAAGTCAGTCGGTGGCCAAGCTACTGG  
GGATTGATTGAAAACCTACATTGTGCTTACAGACCCAGAGTTTCAAGTCAGGTAAAAAATGAATAGGACAATCAAGGAG  
ACTTTGACCAAATTAACGCTTGCAACTGGCACTAGAGACTGGGTACTCCTACTTCCCTTAGCCCTCTACCGAGCCCGCAA  
CACTCCGGGCCCCCATGGACTCACTCCGTATGAAATCCTGTATGGGGCGCCCCCGCCCCCTTGTTAATTTCCATGATCCTG  
AAATGTCAAAGTTTACTAATAGCCCCCTCTCTCCAAGCTCACTTACAGGCCCTCCAAGCAGTACAACGAGAGGTCTGGAAG  
CCACTGGCCGCTGCCTATCAGGACCAGCTGGACCAGCCAGTGATACCACACCCCTTCCGTGTGGCGACACCGTGTGGGT  
ACGCCGGCACCAGACTAAGAACTTGGAACCTCGCTGGAAAGGACCCTACACCGTCTGTGACCACCCCAACCGCTCTCA  
AAGTAGACGGCATCGCTGCGTGGATCCACGCCCTCAAGTAAAGCGGCGACAACCCCTCCGGCCGGAACAGCATCAGGA  
CCGAGTGAAGGTCCAGCGTTCTCAAAACCCCTTAAAGATAAGATTAAACCCGTGGGGCCCCCTAGATGCTCTGGGAATC  
TTAATAAGGGCAGGAGTACGTACAACATGACAGCCCTCATCAGGTCTTCAATGTTACTTGGAGAGTTACCAACTTAAT  
GACAGGACAAACAGCTAATGCTACCTCCCTCCTGGGGACAATGACCGATGCCTTTTCTAAACTGTACTTTGACTTGTGCG  
ATTTAATAGGGGACGACTGGGATGAGACTGGACTCGGGTGTGCGACTCCCGGGGGAAGAAAAAGGGCAAAAAACATTTGAC  
TTCTATGTTTGGCCCGGCATACTGTACCAACAGGGTGTGGAGGGCCGAGAGAGGGCTACTGTGGCAAATGGGGCTGTGA  
GACCACTGGACAGGCATACTGGAAGCCATCATCATCATGGGACCTAATTTCCCTTAAGCGAAGAAACACCCCTCAGAATC  
AGGGCCCCCTGTTATGATTCTCAGCGGTCTCCAGTGACATCAAGGGCGCCACACCGGGGGGTGATGCAATCCCTTAGTC  
CTGGAATTACTGACGCGGGCAAAAAGGCCAGCTGGGATGGCCCCAAAGTATGGGGACTAAGACTGTACCGATCCACAGG  
GACCGACCCGGTGACCCGGTTCTCTTTGACCCGCCAGGTCTCAATATAGGGCCCCGCGTCCCCATTGGGCCTAATCCCG  
TGATCACTGACCAGTTACCCCCCTCCCGACCCGTGCAGATCATGCTCCCCAGGCCTCCTCAGCCTCCTCCTCCAGGCGCA  
GCCTCTATAGTCCCTGAGACTGCCCCACCTTCTCAACAACCTGGGACGGGAGACAGGCTGCTAAACCTGGTAGATGGAGC  
CTACCAAGCTCTCAACCTCACCAGTCCTGACAAAACCCAAGAGTGCTGGTTGTGTCTGGTAGCGGGACCCCCCTACTACG  
AAGGGGTTGCCGTCTAGGTACTTATTCCAACCATACCTCTGCCCCAGCTAACTGCTCCGTGGCCTCCCAACACAAGCTG  
ACCCTGTCCGAAGTGACCGGACAGGGACTCTGCGTAGGAGCAGTTCCCAAAACCCATCAGGCCCTGTGTAATACCACCCA  
GAAGACGAGCGACGGTCTACTATCTGGCTGCTCCCGCCGGGACCATTTGGGCTTGCAACACCGGGCTCACTCCCTGCC  
TATCTACCACTGTGCTCGACCTCACCACCGATTACTGTGTCTGGTTGAGCTCTGGCCAAAGGTGACCTACCACTCCCT  
GGTTATGTTTATGGCCAGTTTGAGAGAAAAACCAATATAAAAGAGAGCCGGTGTCAATTAACCTCTGGCCCTGCTGTTGGG  
AGGACTTACTATGGGCGGCATAGCTGCAGGAGTAGGAACCGGACTACAGCCCTAGTGGCCACCAACAATTCGAGCAGC  
TCCAGGCAGCCATACATACAGACCTTGGGGCTTTAGAAAAGTCAGTCAGTGCCCTAAAAAAGTCTCTGACCTCGTTGTCT  
GAGGTGGTCTTACAGAACCGGAGGAGATTAGATCTACTGTTTCTAAAAAAGGAGGATTATGTGCTGCCCTAAAAAGAAGA  
ATGCTGTTTTCTACGCGGACCACACTGGCGTAGTAAGAGATAGCATGGCAAAGCTAAAAAAGGTTGAACCAGAGACAAA  
AATTGTTTCAATCAGGACAAGGGTGGTTTTGAGGGACTGTTTAAACAGGTCCCCATGGTTTACGACCTTAATATCCACCATT  
ATGGGCCCCCTTGATAATACTTTTTATTAATCCTACTCTTCGGACCCTGTATTCTCAACCGCTTGGTCCAGTTTGTAAAAGA  
CAGAATTTCCGTAGTGCAGGCCCTGGTTTTGACCCAACAGTATCACCAACTCAAATCAATAGATCCAGAAGAAGTGAAT  
CACGTGAATAAAAGATTTTTATTAGTTTTCCAGAAAGAGGGGGGAATGAAAGACCCACCATCAGGCTTAGCAAGCTAGCT  
GCAGTAACGCCATTTTGCAAGGCATAAAAAAGTACCAGAGCTGAGTTCTCAAAAGTTACAAGAAAGTTTCAAGTTAAAGATT  
AACAGTTAAAAATTAAGGCTGAATAATACTGGGACAGGGGCCAAATATCGGTGGTCAAGCACCTGGGCCCCGGCTCAGGG  
CCAAGAACAGATGGCTCTCAGACGTGAGTGTAGCAGAACTAGCTTCACTAATTTAGAAAAATAGAGGTGCACAGAGCTC  
TGGCCACTCCTTGAACCTGTGTGTCTGCCAATGTTCTGACCAGGTGTGTGCCATTGTTGAACCTTCATTAGACCCTCTC  
CTCGTACCCCTCCCATACCCATTTCTTAAAAATAGACATTGTTTAGAACTAAAAAGTCCACCTCAGTTTCCCCAAATGA

CCGAGAAATACCCCAAGCCTTATTGAACTAACCAACCAGCTCGCTTCTCGCTTCTGTAACCGCGCTTTTTGCTCCCCAG  
CCCCAGCCCTATAAAAAAGATAAAAACTCCACACTCGGCGCGCCAGTCTCCGATAGACTGCGTCGCCCCGGGTACCCGTG  
TTCCCAATAAAGCCTCTTGCTGTTTGCATCCGAATCGTGGTCTCGCTGGTCCTTGAGAGGGTCTCCTCAGATTGATTGAC  
TACCCACGTGCGGGGTCTTTCA

>Pmv24

TGAAAGACCCCACCATCAGGCTTAGCAAGCTAGCTGCAGTAACGCCATTTTGCAAGGCATGAAAAAGTACCAGAGCTGAG  
TTCTCAAAAGTTACAAGAAAGTTCAGTTAAAGATTAACAGTTAAAGATTAAGGCTGAATAATACTGGGACAGGGGCCAAA  
TATCGGTGGTCAAGCACCTGGGCCCCGGCTCAGGGCCAAGAACAGATGGCTCTCAGACGTCAGTGTTAGCAGAACTAGCT  
TCACTGATTTAGAAAAATAGAGGTGCACAGTGTCTTGCCCACTCCTTAAACCTGTGTGTCTGCCAATGTTCTGACCAGGT  
GTGTGCCCATTGTTGAACCTTCATTAGACCTTTTCTCGTACCCTCCCATACCCATTTCTTGAAAATAGACATTGTTTA  
GAACTAAAAAGTCCCACCTCAGTTTCCCCAAATGACCGAGAAATACCCCAAGCCTTATTGAACTAACCAACCAGCTCGC  
TTCTCGCTTCTGTAACCGCGCTTTTTGCTCCCCAGCCCCAGCCCTATAAAAAAGGGTAAAACTCCACACTCGGCGCGCCA  
GTCCTCCGATAGACTGCGTCGCCCCGGGTACCCGTGTTCCCAATAAAGCCTCTTGCTGTTTGCATCCGAATCGTGGTCTCG  
CTGGTCCTTGAGAGGGTCTCCTCAGATTGATTGACTACCCACGTGCGGGGTCTTTTCAATTTGGAGGTCCCACCGAGATTTG  
GAGACCCCTGCCCAGGGACCAACCGATCCCCCGCCGGGAGGTAAGCTGGCCAGCGGTGCTTTCTGTGTCTGTCTCTGTCTTC  
GTGCGTGTGTTGTGCCGGCATCCAATGTTTGCCTGCGTCTGTACTAGTTAGCTAACTAGATCTGTATCTGGCGGTTCCG  
CGGAAGAACTGACGAGTTCGTATTCCCGGCCGCGAGCCCTGGGAGACGTCCAGCGGCCTCGGGGGCCCCGTTTTGTGGCC  
CATTCTGTATCAGTTAACTACCCGAGTCGGACTTTTTGGAGCTCCGCCACTGTACGTGGCTTTGTTGGGGGACGAGAGA  
CAGAGACACTTCCCGCCCCCGTCTGAATTTTTGCTTTTGGTTTTATGCCGAAGCCGCGCCGCGCGTCTGATTTGTTTGT  
GTTCTTTTGTCTTCTGTTAGTTTTCTTCTGTCTTTAAGTGTTTTCGAGATCATGGGACAGACCGTAACCTACCCCTCTGAG  
TTTAACCTTGACAGCTGGGGGGATGTCCAGCGCATTGCATCCAACAGTCTGTGGATGTGAGGAAGAGGCGCTGGATTA  
CCTTCTGTTCCGCTGAATGGCCAACCTTTCAATGTGGGATGGCCTCAGGATGGTACTTTCAATTTAAGTATTATCTCTCAG  
GTTAAGTCTAGAGTGTTTTGTCTGGTCCCCACGGACACCCGGATCAGGTCCCATATATCGTCACCTGGGAGGCATTGC  
CTATGACCCCCCTCCGTGGGTCAAACCGTTTCGTGTCTCCTAAACTTCCTCCCTTGCCGACAGCTCCCGTCTCTCCCGCCCG  
GTCCTTCTGCGCAACCTCCGTCCCGATCTGCCCTTTACCCTGCCCTTACCCCTCTATAAAGTCCAAACCTCCTAAGCCC  
CAGGTTCTCCCTGATAGCGGGGACCCCTCATTGACCTTCTCACAGAGGACCCCCCGCGTACAGAGCACAAACCTCCTC  
CTCTGCCAGGAGAACGACGAGAAGAGGCGGCCACCACTCCGAGGTTTTCCCCCTTCTCCCATGGTGTCTCGACTGC  
GGGAAGGAGAGACCTTCCCGCAGTGGACTCCACCACCTCCGAGGATTTCCACTCCGATGGGGGGAGATGGCCAGCTT  
CAGTATTGGCCGTTTTCTCTCGGATTTATACAATTGAAAAATAATAACCTTCTTTTTCTGAAGATCCAGGTAAATT  
GACGGCCTTGATTGAGTCCGTCTCATCACCCACCAGCCACCTGGGACGACTGTGAGCAGTTGTTGGGGACCTGCTGA  
CCGGAGAAGAAAAGCAGCGGGTGCTCCTAGAGGCTAGAAAGGCAGTCCGGGGCAATGATGGACGCCCCACTCAGTTGCCT  
AATGAAGTCAATGCTGCTTTTTCCCTTGAACGCCCCGTTGGGATTACACCCTACAGAAGGTAGGAACCACCTAGTCCT  
CTATCGCCAGTTGCTCTTAGCGGGTCTCCAGAACGCGGGCAGAAGTCCCACCAATTTGGCCAAGGTAAAAGGGATAACCC  
AGGGACCTAATGAGTCTCCCTCAGCCTTTTTAGAGAGACTCAAAGAGGCCTATCGCAGGTACACTCCTTATGACCCTGAG  
GACCCAGGGCAAGAAACCAATGTGTCTATGTCAATCATCTGGCAGTCTGCCCGGATATCGGGCGAAAGTTAGAGCGGTT  
AGAAGATTTAAAGAGCAAGACCTTAGGAGACTTAGTGAGGGAAGCTGAAAAGATCTTTAATAAGCGAGAAACCCCGGAAG  
AAAGAGAGGAACGTATCAAGAGAGAAACAGAGGAAAAAGAAGAACGCCGTAGGGCAGAGGATGAGCAGAGAGAGAAAGAA  
AGGGACCGCAGAAGATATAGAGAGATGAGCAAGCTCTTGCCACTGTAGTTATTGGTCAGAGACAGGATAGACAGGGGGG  
AGAGCGGAGGAGGCCCAACTTGATAAGGACCAATGCGCCTACTGCAAAGAAAAGGGACACTGGGCTAAGGACTGCCCAA  
AGAAGCCACGAGGGCCCCGAGGACTGAGGCCCCAGACCTCCCTCCTAACCTTAGGTGACTAGGGAGGTGAGGGTCAGGAG  
CCCCCCCCCTGAACCCAGGATAACCTCAAAGTCGGGGGGCAACCCGTACCTTCTTGGTAGATACTGGGGCCCCAACACTC  
CGTGCTGACCCAAAATCCTGGACCCCTAAGTGACAAGGCTGCCTGGGTCCAAGGGGCTACTGGAGGAAAGCGGTATCGCT  
GGACCACGGATCGCAAAGTACATCTAGCTACCGGTAAGGTCACCCACTCTTCTCCTCATGTACCAGACTGCCCCCTATCCT  
CTGCTAGGAAGAGACTTGCTGACTAACTAAAAGCCCCAAATCCACTTCGAGGGATCAGGAGCTCAGGTTATGGGACCAAT  
GGGACTGCCCCTGCAAGTGCTGACCTAAACATAGAAGATGAGTATCGGTACATGAGACCTCAAAGAGCCGGATGTTT  
CTCTAGGGTCCACCTGGCTTTCTGATTTTTCCCAAGTCTGGGCGGAAACCGGGGGCATGGGACTGGCAGTTCCGCCAAGCT  
CCTCTGATCATACCTCTGAAGGCAACCTCTACCCCGTGTCCATAAAACAATACCCCATGTACAAGAAGCCAGACTGGG  
GATCAAGCCCCACATACAGAGACTGTTGGACCAGGGAATACTGGTACCCTGCCAGTCCCCCTGGAACACGCCCCCTGCTAC  
CCGTTAAGAAACCAGGGACTAATGATTATAGGCCTGTCCAGGATCTGAGAGAAGTCAACAAGCGGGTGGAAGACATCCAC  
CCCACCGTGCCCAACCTTACAACCTCTTGAGCGGGCTCCCACCGTCCCACCAGTGGTACACTGTGCTTGATTTAAAGGA  
TGCCTTTTTCTGCCTGAGACTCCACCCACCAGTCAGCCTCTCTTCGCTTTGAGTGAGAGATCCAGAGATGGGAATCT  
CAGGACAATTGACCTGGACCAGACTCCACAGGGTTTTCAAAAACAGTCCCACCCTGTTTGATGAGGCACTGCACAGAGAC  
CTAGCAGACTTCCGGATCCAGCACCCAGACTTGATCCTGCTACAGTACGTGGATGACTTACTGCTGGCCGCCACTTCTGA  
GCTCGACTGCCAACAAGTACTCGGGCCCTGTTACAAACCTAGGGAACCTCGGGTATCGGGCCTCGGCCAAGAAAGCCC  
AAATTTGCCAGAAACAGGTCAAGTATCTGGGGTATCTTCTAAAAGAGGGTCAGAGATGGCTGACTGAGGCCAGAAAAGAG  
ACTGTGATGGGGCAGCCTACTCCGAAGACCCCTCGACAATAAGGGAGTTCTAGGGACGGCAGGCTTCTGTGCGCTCTG  
GATCCCTGGGTTTTGCAGAAATGGCAGCCCCCTTGTAACCTCTCACCAAAACGGGGACTCTGTTTAATTGGGGCCCAGACC

AGCAAAAGGCCTATCAAGAAATTAACAGGCTCTTCTAACTGCCCCAGCCCTGGGATTGCCAGATTTGACTAAGCCCTTT  
GAACTCTTTGTTGACGAGAAGCAGGGCTACGCCAAAGGCGTCTTAACGCAAAAAGCTGGGACCTTGGCGTCGGCCGGTGGC  
CTACCTGTCCAAAAAGCTAGACCCAGTGGCAGCTGGGTGGCCCCCTTGCCCTACGGATGGTAGCAGCCATTGCCGTTCTGA  
CAAAAGATGCAGGCAAGCTAACCATGGGACAGCCGCTAGTCATCTGGCCCCCATGCAGTAGAGGCACTAGTCAAGCAA  
CCCCCTGACCGCTGGCTATCCAACGCCCCGATGACCCACTATCAGGCGATGCTCCTAGATACGGACCGGGTCCAGTTCGG  
ACCGGTGGTAGCCCTAAACCCGGCTACGTTGCTCCCCCTACCGGGGAAAGAGCCTCACCATGACTGCCTCGAGATCTTGG  
CCGAGACACACGGAACCAGACCAGACCTCACGGACCAGCCCCCTCCAGACGCCGACCACACCTGGTATACAGATGGAAGC  
AGCTTCTTGCAAGAGGGACAACGTAGGGCTGGAGCAGCGGTGACCACCGAGACCGAGGTAATCTGGGCCAAGGCGTTGCC  
AGCCGGGACATCCGCCCAGCGAGCTGAACTAATAGCACTACCCAGGCCCTAAAGATGGCAGAAGGTAAGAAGCTAAATG  
TTTATACTGATAGCCGCTATGCCTTTGCTACCGCCCATGTCCATGGAGAAATATATAGGAGACGTGGGTTGCTCACCTCA  
GAAGGCAAAGAGATCAAGAACAAGGGCGAAATCTTGGCCTTACTGAAAGCTCTCTTTCTGCCCAAAAGACTCAGTATAAT  
TCACTGCCCAGGACATCAGAAAGGCAATAGTGCTGAAGCTAAAGGCAACCGAATGGCGGACCAGGCAGCCCCGGAAGCAG  
CCATGGGGACTGACACAAAGGCCTCCTCACTTCTCATAGAGACCTCAACCCCGTACACTCCAGACTTCTTCCATTACACT  
GAGACAGATATAAAGAACCTACAAGAGTTGGGAGCCACATATGATAGAGAGAAAAAATATTGGGTCTTGCAAGGTAAACC  
TGTGATGCCTGACCAGTTCACCTTTGAATTATTAGACTTCCTTACCAGCTCACCCACCTTAGCTATCAGAAGATGAGGG  
CACTTCTAGACAGGAAAGAAAGCCCCCTATTACATGCTAAATAAAGATAAGATCCTCCACGAGGTGGCGGAATCATGCCAA  
GCCTGTGTCCAAGTAAATGCCAGTAAGACTAAGATCAGGGCCGGAACACGAGTAAGAGGACATCGACCAGGCACCCATTG  
GAAAATTGACTTTACTGAAGTGAAGCCCGGACTGTATGGGTACAAGTATCTCCTGGTATTCTGTGGACACGTTCTCTGGCT  
GGGTTGAAGCCTTCCCAACCAACATGAGACTGCCAAAATAGTGACCAAGAACTTCTGGAAAAAATATTTCCAAGGTTT  
GGAATGCCCCAAGTGTTGGGGACTGATAATGGGCCTGCCTTCGTCTCCAGGTAAGTCAGTCGGTGGCCAAGCTACTGGG  
GATTGATTGGAACTACATTGTGCTTACAGACCCCAGAGTTCAGGTGAGGTAAAAAGAATGAATAGGACAATCAAGGAGA  
CTTTGACCAATTAACGCTTGCAACTGGCACTAGAGACTGGGTACTCCTACTTCCCTTAGCCCTCTACCGAGCCCCGCAAC  
ACTCCGGGCCCCCATGGACTCACTCCGTATGAAATCCTGTATGGGGCGCCCCCGCCCCCTTGTTAATTTCCATGATCCTGA  
AATGTCAAAGTTTACTAATAGCCCCCTCTCTCCAAGCTCACTTACAGGCCCTCCAAGCAGTACAACGAGAGGTCTGGAAGC  
CACTGGCCGCTGCCTATCAGGACCAGCTGGACCAGCCAGTGATACCACACCCCTTCCGTGTGCGGACACCGTGTGGGT  
CGCCGGCACCAGACTAAGAACTTGGAACCTCGCTGGAAAGGACCCTACACCGTCTGTGACACCCCCACCGCTCTCAA  
AGTAGACGGCATCGCTGCGTGGATCCACGCCCTCACGTAAAAGCGGCACAAACCCCTCCGGCCGGAACAGCATCAGGAC  
CGACATGAAAGGTCAGCGTTTCTCAAAACCCCTTAAAGATAAGATTAAACCCGTGGGGCCCCCTAATAATCTGGGGACTCT  
TAATAAGGGCAGGAGTATCAGTACAACATGACAGCCCTCATCAGGTCTTCAATGTTACTTGGAGAGTTACCAACTTAATG  
ACAGGACAAACAGCTAATGCTACCTCCCTCCTGGGGACAATGACCGATGCCTTTTCTAAACTGTACTTTGACTTGTGCGA  
TTTAATAGGGGACGACTGGGATGAGACTGGACTCGGGTGTGCACTCCCGGGGGAAGAAAAAGGGCAAGAACATTTGACT  
TCTATGTTTGGCCCCGGGCATACTGTACCAACAGGGTGTGGAGGGCCGAGAGAGGGCTACTGTGGCAAATGGGGCTGTGAG  
ACCACTGGACAGGCATACTGGAAGCCATCATCATGAGGACCTAATTTCCCTTAAGCGAGGAAACACCCCTCGGAATCA  
GGGCCCCGTGTTATGATTCTCAGCGGTCTCCAGTGACATCAAGGGCGCCACACCGGGGGTTCGATGCAATCCCCTAGTCC  
TGGAATTCAGTGACACGGGCAAAAAGGCCAGCTGGGATGGCCCCAAAGTATGGGGACTAAGACTGTACCGATCCACAGGG  
ACCGACCCGGTGACCCGTTTCTCTTTGACCCGCCAGGTCTCAATATAGGGCCCCGCGTCCCCATTGGGCCTAATCCCGT  
GATCACTGACCAGTTACCCCCCTCCCGACCCGTGCAGATCATGCTCCCCAGGCCTCCTCAGCCTCCTCCTCCAGGCGCAG  
CCTCTATAGTCCCTGAGACTGCCCCACCTTCTCAACAACCTGGGACGGGAGACAGGCTGCTAAACCTGGTAGATGGAGCC  
TACCAAGCTCTCAACCTCACCAGTCCCAGACAAAACCAAGAGTGCTGGTTGTGTCTGGTAGCGGGACCCCCCTACTACGA  
AGGGGTTGCCGTCTAGGTACTTATTCCAACCATACTCTGCCCCAGCTAACTGCTCCGTGGCCTCCCAACACAAGCTGA  
CCCTGTCCGAAGTGACCGGACAGGGACTCTGCGTAGGAGCAGTTCCCAAAACCCATCAGGCCCTGTGTAATACCACCCAG  
AAGACGAGCGACGGGTCTACTATCTGGCTGCTCCCGCCGGGACCATTGGGGCTTGCAACACCGGGCTCACTCCCTGCCT  
ATCTACCACTGTACTCGACCTCACCACCGATTACTGTGTCTTGGTTGAGCTCTGGCCAAAGGTGACCTACCACTCCCCTG  
GTTATGTTTATGGCCAGTTTGAGAGAAAAACCAATATAAAAGAGAGCCGGTGTCACTAACTCTGGCCCTGCTGTTGGGA  
GGACTTACTATGGCGGCATAGCTGCAGGAGTAGGAACGGGACTACAGCCCTAGTGGCCACCAACAATTCGAGCAGCT  
CCAGGCAGCCATACATACAGACCTTGGGGCTTTAGAAAAGTCAGTCAGTGCCCTAGAAAAGTCTCTGACCTCGTTGTCTG  
AGGTGGTCTACAGAACCGGAGGGGATTAGATCTACTGTTTCTAAAAGAAGGAGGATTATGTGCTGCCCTAAAAGAAGAA  
TGCTGTTTCTACGCGGACCACACTGGCGTAGTAAGAGATAGCATGGCAAAGCTAAGAGAAAGGTTGAACCAGAGACAAAA  
ATTGTTTGAATCAGGACAAGGGTGGTTTGGAGGACTGTTTAAACAGGTCCCCATGGTTACGACCTTAATATCCACCATTA  
TGGGCCCCCTTGATAATACTTTTATTAACTCTACTCTTCGACCCCTGTATTCTCAACCGCTTGGTCCAGTTTGTAAAAGAC  
AGAATTTGCGTAGTGACGGCCCTGGTTTTGACCCAACAGTATACCAACTCAAATCAATAGATCCAGAAGAAGTGAATC  
ACGTGAATAAAAGATTTTATTAGTTTTCCAGAAAGAGGGGGGAATGAAAGACCCACCATCAGGCTTAGCAAGCTAGCTG  
CAGTAACGCCATTTTGAAGGCATGAAAAAGTACCAGAGCTGAGTTCTCAAAAGTTACAAGAAAGTTAGTTAAAGATTA  
ACAGTTAAAGATTAAGGCTGAATAATACTGGGACAGGGGCCAAATATCGGTGGTCAAGCACCTGGGCCCCGGCTCAGGGC  
CAAGAACAGATGGCTCTCAGACGTGAGTGTAGCAGAACTAGCTTCACTGATTTAGAAAAATAGAGGTGCACAGTGCTCT  
GGCCACTCCTTAAACCTGTGTGTCTGCCAATGTTCTGACCAGGTGTGTGCCATTGTTGAACCTTCATTAGACCCCTTCC  
TCGTACCCCTCCCATACCCATTTCTTGAAAATAGACATTGTTTAGAATAAAAAGTCCCACCTCAGTTTCCCCAAATGAC

CGAGAAATACCCCAAGCCTTATTTCGAACTAACCAACCAGCTCGCTTCTCGCTTCTGTAACCGCGCTTTTTTGCTCCCCAGC  
CCCAGCCCTATAAAAAGGGTAAAACTCCACACTCGGCGCGCCAGTCTCCGATAGACTGCGTCGCCCCGGGTACCCGTGT  
TCCCAATAAAGCCTCTTGCTGTTTGCATCCGAATCGTGGTCTCGCTGGTCTCTGAGAGGGTCTCCTCAGATTGATTGACT  
ACCCACGTGGGGGTCTTTCA

>Pmv4

TGAAAGACCCCACCATCAGGCTTAGCAAGCTAGCTGCAGTAACGCCATTTTGCAAGGCATGAAAAAGTACCAGAGCTGAG  
TTCTCAAAAGTTACAAGAAAGTTCAGTTAAAGATTAAACAGTTAAAGATTAAAGGCTGAATAATACTGGGACAGGGGCCAAA  
TATCGGTGGTCAAGCACCTGGGCCCCGGCTCAGGGCCAAGAACAGATGGCTCTCAGACGTCAGTGTTAGCAGAACTAGCT  
TCACTGATTTAAAAAATAGAGGTGCACAGTGTCTTGGCCACTCTTTAAACCTGTGTGTCTGCCAATGTTCTGACCAGGT  
GTGTGCCCATTGTTGAACCTTCATTAGACCTTTTCTCGTACCCTCCCATACCCATTTCTTGAAAATAGACATTGTTTAA  
GAACTAAAAAGTCCCACCTCAGTTTCCCCAAATGACCGAGAAATACCCCAAGCCTTATTTAACTAACCAACCAGCTCGC  
TTCTCGCTTCTGTAACCGCGCTTTTTTGCTCCCCAGCCCCAGCCCTATAAAAAGGGTAAAACTCCACACTCGGCGGCCA  
GTCCTCCGATAGACTGCGTCGCCCCGGGTACCCGTGTTCCCAATAAAGCCTCTTGCTGTTTACATCCGAATCGTGGTCTCG  
CTGGTCTCTGAGAGGGTCTCCTCAGATTGATTGACTACCCACGTGGGGGTCTTTTCAATTTGGAGGTCCCACCGAGATTTA  
GAGACCCCTGCCCAGGGACACCGACCCCCCGCGGGAGGTAAGCTGGCCAGCGGTGCTTTCTGTGTCTGTCTCTGTCTTC  
GTGCGTGTGTTGTGCCGGCATCCAATGTTTGCCTGTGCTGTACTAGTTAGCTAACTAGATCTGTATCTGGCGGTTCCG  
CGGAAGAACTGACGAGTTCGTATTCCCGGCCGCGAGCCCTGGGAGACGTCCAGCGGCCCTCGGGGGCCCCGTTTTGTGGCC  
CATTCTGTATCAGTTAACTACCCGAGTCGGACTTTTTGGAGCTCCGCCACTGTACGTGGCTTTGTTGGGGGACGAGAGA  
CAGAGACACTTCCCGCCCCCGTCTGAATTTTTGCTTTTCGGTTTTACGCCGAAGCCGCGCCGCGCTCTGATTTGTTTGT  
GTTCTTTTGTCTTCTGTTAGTTTTCTTCTGTCTTTAAGTGTTTTCGAGATCATGGGACAGACCGTAACCTACCCCTCTGAG  
TTTAACCTTGACAGCTGGGGAGATGTCCAGCGCATTGCATCCAACAGTCTGTGGATGTGAGGAAGAGGCGCTGGATTA  
CCTTCTGTTCCGCTGAATGGCCAATTTTCAATGTGGGATGGCCTCAGGATGGTACTTTCAATTTAAGTATTATCTCTCAG  
GTTAAGTCTAGAGTGTTTTGTCTGGTCCCCACGGACACCCGGATCAGGTCCCATATATCGTCACCTGGGAGGCATTGC  
CTATGACCCCCCTCCGTGGGTCAAACCGTTTTGTGTCTCCTAACTTCCTCCCTTGCCGACAGCTCCCGTCTCTCCGCCCCG  
GTCCTTCTGCGCAACCTCCGTCCCGATCTGCCCTTTACCCTGCCCTTACCCCTCTATAAAGTCCAAACCTCCTAAGCCC  
CAGGTTCTCCCTGATAGCGGGGACCCCTCATTGACCTTCTCACAGAGGACCCCCGCGGTACAGAGCACAAACCTCCTC  
CTCTGCCAGGAGAACGACGAGAAGAGGCGGCCACCACTCCGAGGTTTTCCCCCTTCTCCATGGTGTCTCGACTGC  
GGGAAGGAGAGACCTTCCCGCAGTGGACTCCACCACCTCCGAGCTTTCCACTCCGATGGGGGGAGATGGCCAGCTT  
CAGTATTGGCCGTTTTCTCTCGGATTTATACAATTGGAATAAATAACCTTCTTTTTCTGAAGATCCAGGTAAATT  
GACGGCCTTAATTGAGTCCGTCTCATCACCCACCAGCCACCTGGGACGACTGTGAGCAGTTGTTGGGGACCTGCTGA  
CCGGAAGAAAAGCAGCGGGTGCTCCTAGAGGCTAGAAAGGCAGTCCGGGACAATGATGGACGCCCCACTCAGTTGCCT  
AATGAAGTCAATGCTGCTTTTTCCCTTAAACGCCCCGTTGGGATTACACCCTACAGAAGGTAGGAACCACCTAGTCCT  
CTATCGCCAGTTGCTCTTAGCGGGTCTCCAGAACGCGGGCAGAAGTCCCACCAATTTGGCCAAGGTAAAAGGGATAACCC  
AGGGACCTAATGAGTCTCCCTCAGCCTTTTTAGAGAGACTCAAAGAGGCCTATCGCAGGTACACTCCTTATGACCCTGAG  
GACCCAGGGCAAGAAACCAATGTGTCTATGTCAATCATCTGGCAGTCTGCCCGGATATCGGGCAAAAGTTAGAGCGGTT  
AAAAGATTTAAAGAGCAAGACCTTAGGAGACTTAGTGAGGAAAGCTGAAAAGATCTTTAATAAGCGAAAAACCCCGGAAG  
AAAGAGAGGAACGTATCAAGAGAAAAACAGAGGAAAAAGAAGAACGCCGTAGGGCAGAGGATGAGCAGAGAAAAA  
AAGGGACCGCAGAAGACATAGAGAAATGAGCAAGCTCTTGCCACTGTAGTTATTGGTCAGAGACAGGATAGACAGGGGG  
GAGAGCGGAGGAGGCCCAACTTGATAAGGACCAATGCGCCTACTGCAAAGAAAAGGGACACTGGGCTAAGGACTGCCCA  
AAGAAGCCACGAGGGCCCCGAGGACTGAGGCCCCAGACCTCCCTCCTAACCTTAGGTGACTAGGAAGGTGAGGGTCAGGA  
GCCCCCCCCCTGAACCCAGGATAACCTCAAAGTCGGGGGGCAACCCGTCACCTTCTTGGTAGATACTGGGGCCCAACACT  
CCGTGCTGACCCAAAATCCTGGACCCCTAAGTGACAAGGCTGCCTGGGTCCAAGGGGCTACTGGAAGAAAGCGGTATCGC  
TGGACCACGGATCGCAAAGTACATCTAGCTACCGGTAAGGTACCCACTCTTCTCCTCATGTACCAGACTGCCCCATCC  
TCTGTCTAAAAAGAGACTTGCTGACTAACTAAAAGCCCAATCCACTTCGAGGGATCAGGAGCTCAGGTTATGGGACCA  
TGAGACTGCCCCTGCAAGTGCTGACCCTAAACATAGAAGTAGTATCGGCTACATGAGACCTCAAAGAGCCGGATGTT  
TCTCTAGGGTCCACCTGGCTTTCTGATTTTCCCCAGGTCTGGGCAAAAACCGGGGGCATGGGACTGGCAGTTCCGCAAGC  
TCCTCTGATCATACCTCTAAAGGCAACCTCTACCCCGTGTCCATAAAACAATACCCCATGTGACAAGAAGCCAGACTGG  
GGATCAAGCCCCACATACAGAGACTGTTGGACCAGGGAATACTGGTACCCTGCCAGTCCCCCTGAAACACGCCCCCTGCTA  
CCCGTTAAAAAACCAGGGACTAATGATTATAGGCCTGTCCAGGATCTGAGAAAAGTCAACAAGCGGGTAAAAGACATCCA  
CCCCACCGTGCCCAACCTTACAACCTCTTGAGCGGGCTCCACCGTCCACAGTAGTACACTGTGCTTAATTTAAAGG  
ATGCCTTTTTTCTGCCTGAGACTCCACCCACCAGTCAGCCTCTCTTGCCTTTGAGTGGAGAGATCCAGAGATGGGAATC  
TCAGGACAATTGACCTGGACCAGACTCCCACAGGGTTTCAAAAACAGTCCCACCCTGTTTGATGAGGCACTGCACAGAGA  
CCTAGCAGACTTCCGGATCCAGCACCCAGACTTGATCCTGCTACAGTACGTGGATGACTTACTGCTGGCCGCCACTTCTG  
AGCTAGACTGCCAACAAGGTAAGTCTGGGCCCTGTTGCAAACCTAGAGAACCTCGGGTATCGGGCTCGGCCAAGAAAGCC  
CAAATTTGCCAGAAACAGGTCAAGTATCTGGGGTATCTTCTAAAAGAGGGTCAGAGATGGCTGACTGAGGCCAGAAAAGA  
GACTGTGATGGGGCAGCCTACTCCGAAGACCCCTCGACAATAAGGGAGTTCTAGGGACGGCAGGCTTCTGTGCGCTCT  
GGATCCCTGGGTTTGAGAAATGGCAGCCCCCTTGTAACCTCTCACAAAACGGGGACTCTGTTTAATTGGGGCCAGAC

CAGCAAAAGGCCTATCAAAAAATCAAACAGGCTCTTCTAACTGCCCCAGCCCTGAGATTGCCAGATTTGACTAAGCCCTT  
TAAACTCTTTGTGCGACGAGAAGCAGGGCTACGCCAAAGGCGTCCTAACGCAAAAACTGGGACCTTGGCGTCGGCCGGTGG  
CCTACCTGTCCAAAAGCTAGACCCAGTGGCAGCTGGGTGGCCCCCTTGCCCTACGGATGGTAGCAGCCATTGCCGTTCTG  
ACAAAAGATGCAGGCAAGCTAACCATGGGACAGCCGCTAGTCATCCTGGCCCCCATGCAGTAGAGGCACCTAGTCAAGCA  
ACCCCCGGATCGCTGGCTATCCAACGCCCGCATGACCCACTATCAGGCGATGCTCCTAGATACGGACCGGGTCCAGTTTCG  
GACCGGTGGTAGCCCTAAACCCGGCTACGTTGCTCCCCCTACCGGGAAAAGAGCCTCACCATGACTGCCTCGAGATCTTG  
GCCGAGACACACGGAACCAGACCAGACCTCACGGACCAGCCCCCTCCAGACGCCGACCACACCTGGTATACAGATAAAAG  
CAGCTTCCTGCAAGAGGGACAACGTAGGGCTAGAGCAGCGGTGACCACCGAGACCGAGGTAATCTGGGCCAAGGCATTGC  
CAGCCGGGACATCCGCCAGCGAGCTGAACCTAATAGCACTACCCAGGCCCTAAAGATGGCAGAAGGTAAGGTAAGGTAAGG  
GTTTTATACTGATAGCCGCTATGCTTTTGTCTACCGCCCATGTCCATGGAGAAATATATAAGAGACGTGGGTTGCTCACCTC  
AGAAGGCAAGGAGATCAAGAACAAGGGCGAAATCTTGGCCTTACTGAAAGCTCTCTTTCTGCCAAAAGACTCAGTATAA  
TTCCTGCCCAGGACATCAGAAAGGCAATAGTGCTGAAGCTAAAGGCAACCGAATGGCGGACCAGGCAGCCCGGAAGCA  
GCCATGGGGACTAACACAAAGGCCTCCTCACTTCTCATAGAGACCTCAACCCCGTACACTCCAGACTTCTTCCATTATAC  
TGAGACAGATATAAAGAACCTACAGGAGTTGGGAGCCACATATGATAGAGAAAAAATATTGGGTCTTGCAAAGTAAAC  
CTGTGATGCCTGACCAGTTCACCTTTAAATTATTAGACTTCCTTCACCAGCTCACCACCTTAGCTATCAGAAGATAAGG  
GCACCTTCTAGACAAGAAAGAAAGCCCTATTACATGCTAAATAAAGATAAGATCCTCCACGAAGTGGCAGAATCATGCCA  
AGCCTGTGTCCAAGTAAATGCCAGTAAGACTAAGATCAGGGCCGGAACACGAATAAGAGGACATCGACCAGGCACCCATT  
AAAAAATTGACTTTACTGAAGTAAAGCCCGGACTGTATGGGTACAAGTATCTCCTGGTATTCTGTAACACGTTCTCTGGC  
TGGGTTAAAGCCTTCCCAACCAACATGAGACTGCCAAAATAGTGACCAAGAACTTCTGAAAAAATATTTCCAAAGTT  
TAAATGCCCCAAGTGTTGGGGACTGATAATGGGCCTGCCTTCGTCTCCAGGTAAGTCAGTCGGTGGCCAAGCTACTGG  
GGATTGATTAAGAACTACATTGTGCTTACAGACCCAGAGTTTCAAGTCAGGTAAAAAATAAATAAGACAATCAAGGAG  
ACTTTGACCAAATTAACGCTTGCAACTGGCACTAGAGACTGGGTACTCCTACTTCCCTTAGCCCTCTACCGAGCCCGCAA  
CACTCCGGGCCCCCATAGACTCACTCCGTATAAAATCCTGTATGGGGCGCCCCCGCCCCCTTGTTAATTTCCATGATCCTG  
AAATGTCAAAGTTTACTAATAGCCCCCTCTCTCCAAGCTCACTTACAGGCCCTCCAAGCAGTACAACGAGAGGTCTAGAAG  
CCACTGGCCGCTGCCTATCAGGACCAGCTGGACCAGCCAGTAATACCACACCCCTTCCGTGTGGCGACACCGTGTGGGT  
ACGCCGGCACCAGACTAAGAACTTAGAACCTCGCTAAAAAGGACCCTACACCGTCTGTGACCACCCCAACCGCTCTCA  
AAGTAGACGGCATCGCTGCGTGGATCCACGCCCTCAAGTAAAGCGGCGACAACCCCTCCGGCCGAACAGCATCAGGA  
CCGACATAAAAAAGTCCAGCGTTCTCAAAACCCCTTAAAGATAAGATTAAACCCGTGGGGCCCCCTAATAGTCTCTGGGATC  
TTAATAAGGGCAGGAGTACGTACAACATGACAGCCCTCATCAGGTCTTCAATGTTACTTAAAAAGTTACCAACTTAAT  
GACAGGACAAACAGCTAATGCTACCTCCCTCCTGGGGACAATGACCGATGCCTTTTCTAACTGTACTTTGACTTGTGCG  
ATTTAATAGGGGACGACTGAGATGAGACTGGACTCGGGTGTGCGACTCCCGGGGAAAAAAGGGCAAGAACATTTGAC  
TTCTATGTTTGGCCCGGCATACTGTACCAACAGGGTGTAGAGGGCCGAAAAAGGGCTACTGTGGCAAATGGGGCTGTGA  
GACCACTGGACAGGCATACTGAAAGCCATCATCATCATGGGACCTAATTTCCCTTAAAGCGAAGAAACACCCCTCAGAATC  
AGGGCCCCCTGTTATGATTCTCAGCGGTCTCCAGTGACATCAAGGGCGCCACACCGGGGGGTGATGCAATCCCTAGTC  
CTAAAATTCACTGACGCGGGCAAAAAGGCCAGCTGGGATGGCCCCAAAGTATAGAGACTAAGACTGTACCGATCCACAGG  
GACCGACCCGGTGACCCGGTTCTCTTTGACCCGCCAGGTCTCAATATAGGGCCCCGCGTCCCCATTGGGCCTAATCCCG  
TGATCACTGACCAGTTACCCCCCTCCCGACCCGTGCAGATCATGCTCCCCAGGCCTCCTCAGCCTCCTCCTCCAGGCGCA  
GCCTCTATAGTCCCTGAGACTGCCCCACCTTCTCAACAACCTGGGACGAGAGACAGGCTGCTAAACCTGGTAAATAGAGC  
CTACCAAGCTCTCAACCTCACCAGTCCTGACAAAACCCAAGAGTGCTGGTTGTGTCTGGTAGCGGGACCCCCCTACTACG  
AAGGGGTTGCCGTCTAGGTACTTATTCCAACCATACCTCTGCCCCAGCTAACTGCTCCGTGGCCTCCCAACACAAGCTG  
ACCCTGTCCAAAGTGACCGGACAGGGACTCTGCGTAAGAGCAGTTCCCAAAACCCATCAGGCCCTGTGTAATACCACCCA  
AAAGACGAGCGACGGTCTACTATCTGGCTGCTCCCGCCGAGACCATTTAGGCTTGCAACACCGGGCTCACTCCCTGCC  
TATCTACCACTGTACTCGACCTCACCACCGATTACTGTGTCTGGTTGAGCTCTGGCCAAAGGTGACCTACCACTCCCT  
AGTTATGTTTATGGCCAGTTTGAAAAAACCACAAATATAAAGAGAGCCGGTGTCAATTAATCTGGCCCTGCTGTAAAG  
AAGACTTACTATGGGCGGCATAGCTGCAGGAGTAAAAACCGGACTACAGCCCTAGTGGCCACCAACAATTCGAGCAGC  
TCCAGGCAGCCATACATACAGACCTTGGGGCTTTAAAAAAGTCAGTCAGTGCCCTAAAAAAGTCTCTGACCTCGTTGTCT  
GAGGTGGTCTTACAGAACCGGAGGGGATTAGATCTACTGTTCTAAAAAAGGAAGATTATGTGCTGCCCTAAAAA  
ATGCTGTTTCTACGCGGACCACACTGGCGTAGTAAGAGATAGCATGGCAAAGCTAAAAAAGGTTAAACCAGAGACAAA  
AATTGTTTCAATCAGGACAAGGGTGGTTTAAAGGACTGTTTAAACAGGTCCCCATGGTTTACGACCTTAATATCCACCATT  
ATGGGCCCCCTTGATAATACTTTTATTAATCCTACTCTTCGGACCCTGTATTCTCAACCGCTTGGTCCAGTTTGTAAAGA  
CAAAATTTCCGTAGTGCAGGCCCTGGTTTTGACCCAACAGTATCACCACCTCAAATCAATAGATCCAGAAAAAGTAAAT  
CACGTAAATAAAAGATTTTATTAGTTTCCAGAAAGAGGGGGGAATGAAAGACCCACCATCAGGCTTAGCAAGCTAGCT  
GCAGTAACGCCATTTTGCAAGGCATGAAAAAGTACCAGAGCTGAGTTCTCAAAAGTTACAAGAAAGTTTCAAGTTAAAGATT  
AACAGTTAAAGATTAAGGCTGAATAATACTGGGACAGGGGCCAAATATCGGTGGTCAAGCACCTGGGCCCCGGCTCAGGG  
CCAAGAACAGATGGCTCTCAGACGTGAGTGTAGCAGAACTAGCTTCACTGATTTAAAAAATAGAGGTGCACAGTGCTC  
TGGCCACTCCTTAAACCTGTGTGTCTGCCAATGTTCTGACCAGGTGTGTGCCATTGTTGAACCTTCATTAGACCCCTTC  
CTCGTACCCCTCCCATACCCATTTCTTGAAAATAGACATTGTTTAGAACTAAAAAGTCCACCTCAGTTTCCCCAAATGA

CCGAGAAATACCCCAAGCCTTATTCAAACCTAACCAACCAGCTCGCTTCTCGCTTCTGTAACCGCGCTTTTTGCTCCCCAG  
CCCCAGCCCTATAAAAAGGGTAAAACTCCACACTCGGCGCGCCAGTCTCTCGATAGACTGCGTCGCCCCGGGTACCCGTG  
TTCCCAATAAAGCCTCTTGCTGTTTACATCCGAATCGTGGTCTCGCTGGTCCTTGAGAGGGTCTCCTCAGATTGATTGAC  
TACCCACGTGCGGGGTCTTTCA

>Pmv5

TGAAAGACCCCACCATCAGGCTTAGCAAGCTAGCTGCAGTAACGCCATTTTGCAAGGCATGAAAAAGTACCAGAGCTGAG  
TTCTCAAAAGTTACAAGAAAGTTCAAGTTAAAGATTAACAGTTAAAGATTAAGGCTGAATAATACTGGGACAGGGGCCAAA  
TATCGGTGGTCAAGCACCTGGGCCCCGGCTCAGGGCCAAGAACAGATGGCTCTCAGACGTCAGTGTTAGCAGAACTAGCT  
TCACTGATTTAGAAAAATAGAGGTGCACAGTGTCTGCGCCACTCCTTGAACCTGTGTGTCTGCCAATGTTCTGACCAGGT  
GTGTGCCCATTGTTGAACCTTCATTAGACCTTTCTCGTACCCCTCCCATACCCATTTCTTGAAAATAGACATTGTTTA  
GAACTAAAAAGTCCCACCTCAGTTTCCCCAAATGACCGAGAAATACCCCAAGCCTTATTGAACTAACCAACCAGCTCGC  
TTCTCGCTTCTGTAACCGCGCTTTTTGCTCCCCAGCCCCAGCCCTATAAAAAGGGTAAAACTCCACACTCGGCGCGCCA  
GTCCTCCGATAGACTGCGTCGCCCCGGGTACCCGTGCTCCCAATAAAGCCTCTTGCTGTTTGCATCCGAATCGTGGTCTCG  
CTGGTCCTTGAGAGGGTCTCCTCAGATTGATTGACTACCCACGTGCGGGGTCTTTTCAATTTGGAGGTCCCACCGAGATTTG  
GAGACCCCTGCCCAGGGACCAACGACCCCCCGCGGGAGGTAAGCTGGCCAGCGGTGCTTTCTGTGTCTGTCTCTGTCTTC  
GTGCGTGTGTTGTGCCGGCATCCAATGTTTGGCCTGCGTCTGTACTAGTTAGCTAACTAGATCTGTATCTGGCGGTTCCG  
CGGAAGAACTGACGAGTTCGTATTCCCGGCCGCGAGCCCTGGGAGACGTCCAGCGGCCTCGGGGGCCCCGTTTTGTGGCC  
CATTCTGTATCAGTTAACTACCCGAGTCGGACTTTTTGGAGCTCCGCCACTGTACGTGGCTTTGTTGGGGGACGAGAGA  
CAGAGACACTTCCCGCCCCCGTCTGAATTTTTGCTTTTCGGTTTTACGCCGAAGCCGCGCCGCGCGTCTGATTTGTTTGT  
GTTCTTTTGTCTTCTGTTAGTTTTCTTCTGTCTTTAAGTGTTTTCGAGATCATGGGACAGACCGTAACCTACCCCTCTGAG  
TTTAACCTTGACGACTGGGGAGATGTCCAGCGCATTGCATCCAACAGTCTGTGGATGTCAGGAAGAGGCGCTGGATTA  
CCTTCTGTTCCGCTGAATGGCCAACCTTTCAATGTGGGATGGCCTCAGGATGGTACTTTCAATTTAAGTATTATCTCTCAG  
GTTAAGTCTAGAGTGTTTTGTCTGGTCCCCACGGACACCCGGATCAGGTCCCATATATCGTCACCTGGGAGGCATTGC  
CTATGACCCCCCTCCGTGGGTCAAACCGTTTTGTGTCTCCTAAACTTCCTCCCTTGCCGACAGCTCCCGTCTCTCCCGCCCG  
GTCCTTCTGCGCAACCTCCGTCCCGATCTGCCCTTTACCCTGCCCTTACCCCTCTATAAAGTCCAAACCTCCTAAGCCC  
CAGGTTCTCCCTGATAGCGGCGGACCCCTCATTGACCTTCTCACAGAGGACCCCCCGCGGTACAGAGCACAAACCTCCTC  
CTCTGACAGGAGAGACGACGAAGAAGAGGCGGCCACCACTCCGAGGTTTTCCCCCTTCTCCTCATTGGTGTCTCGACTG  
CGGGGAGGAGAGACCCCTCCCGCAGTGGACTCCACCCTCCAGGCAATTTCCACTCCGCATGGGGGAGATGGCCAGCT  
TCAGTATTGGCCGTTTTCTCTTCGATTTATACAATTGAAAAATAATAACCCTTCCTTTTCTGAAGATCCAGGTAAAT  
TGACGGCCTTGATTGAGTCCGTCTCATACCCACCAGCCACCTGGGACGACTGTGAGCAGTTGTTGGGGACCTGCTG  
ACCGGAGAAGAAAAGCAGCGGGTGTCTCTAGAGGCTAGAAAGGCAGTCCGGGGCAATGATGGACGCCCCACTCAGTTGCC  
TAATGAAGTCAATGCTGCTTTTTCCCCCTGAACGCCCCGGTTGGGATTACACCCTACAGAAGGTAGGAACCACCTAGTCC  
TCTATCGCCAGTTGCTCTTAGCGGGTCTCCAGAACGCGGGCAGAAGTCCCACCAATTTGGCCAAGGTAAAAGGGATAACC  
CAGGGACCTAATGAGTCTCCCTCAGCCTTTTTAGAGAGACTCAAAGAGGCCTATCGCAGGTACACTCCTTATGACCCTGA  
GGACCCAGGGCAAGAAACCAATGTGTCTATGTCAATCATCTGGCAGTCTGCCCCGATATCGGGCGAAAGTTAGAGCGGT  
TAGAAGATTTAAAGAGCAAGACCTTAGGAGACTTAGTGAGGGAAGCTGAAAAGATCTTTAATAAGCGAGAAACCCCGGAA  
GAAAGAGAGGAACGTATCAAGAGAGAAACAGAGGAAAAAGAAGAACGCCGTAGGGCAGAGGATGAGCAGAGAGAGAAAGA  
AAGGGACCGCAGAAGACATAGAGAGATGAGCAAGCTCTTGCCACTGTAGTTATTGGTCAGAGACAGGATAGACAGGGGG  
GAGAGCGGAGGAGGCCCAACTTGATAAGGACCAATGCGCCTACTGCAAAGAAAAGGGACACTGGGCTAAGGACTGCCCA  
AAGAAGCCACGAGGGCCCCGAGGACTGAGGCCCCAGACCTCCCTCCTAACCTTAGGTGACTAGGGAGGTGAGGGTCAGGA  
GCCCCCCCCCTGAACCCAGGATAACCTCAAAGTCGGGGGGCAACCCGTCACCTTCCTGGTAGATACTGGGGCCCAACACT  
CCGTGCTGACCCAAAATCCTGGACCCCTAAGTGACAAGGCTGCCTGGGTCCAAGGGGCTACTGGAGGAAAGCGGTATCGC  
TGGACCACGGATCGCAAAGTACATCTAGCTACCGGTAAGGTACCCACTCTTTCCTCCATGTACCAGACTGCCCCATCC  
TCTGCTAGGAAGAGACTTGCTGACTAACTAAAAGCCCAAATCCACTTCGAGGGATCAGGAGCTCAGGTTATGGGACCA  
TGGGACTGCCCCTGCAAGTGCTGACCCTAAACATAGAAGATGAGTATCGGTACATGAGACCTCAAAGAGCCGGATGTT  
TCTCTAGGGTCCACCTGGCTTTCTGATTTTTCCCGAGGTCTGGGCGGAAACCGGGGGCATGGGACTGGCAGTTTCGCCAAGC  
TCCTCTGATCATACCTCTGAAGGCAACCTCTACCCCGTGTCCATAAAACAATACCCCATGTACAAGAAGCCAGACTGG  
GGATCAAGCCCCACATACAGAGACTGTTGGACCAGGGAATACTGGTACCCTGCCAGTCCCCCTGGAACACGCCCCCTGCTA  
CCCGTTAAGAAACCAGGGACTAATGATTATAGGCCTGTCCAGGATCTGAGAGAAGTCAACAAGCGGGTGGAAGACATCCA  
CCCCACCGTGCCCCAACCTTACAACCTCTTGAGCGGGCTCCACCGTCCACCAAGTGGTACACTGTGCTTGATTTAAAGG  
ATGCCTTTTTCTGCCTGAGACTCCACCCACCAGTCAGCCTCTCTTCGCCTTTGAGTGGAGAGATCCAGAGATGGGAATC  
TCAGGACAATTGACCTGGACCAGACTCCCACAGGGTTTCAAAAACAGTCCCACCCTGTTTGATGAGGCACTGCACAGAGA  
CCTAGCAGACTTCCGGATCCAGCACCCAGACTTGATCCTGCTACAGTACGTGGATGACTTACTGCTGGCCGCCACTTCTG  
AGCTCGACTGCCAACAAGGTAAGTCTCGGGCCCTGTTACAAACCTAGGGGACCTCGGGTATCGGGCCTCGGCCAAGAAAGCC  
CAAATTTGCCAGAAACAGGTCAAGTATCTGGGGTATCTTCTAAAAGAGGGTCAGAGATGGCTGACTGAGGCCAGAAAAGA  
GACTGTGATGGGGCAGCCTACTCCGAAGACCCCTCGACAATAAGGGAGTTCTAGGGACGGCAGGCTTCTGTGCGCTCT  
GGATCCCTGGGTTTGAGAAATGGCAGCCCCCTTGTAACCTCTCACAAAACGGGGACTCTGTTTAATTGGGGCCAGAC

CAGCAAAAGGCCTATCAAGAAATCAAACAGGCTCTTCTAACTGCCCCAGCCCTGGGATTGCCAGATTTGACTAAGCCCTT  
TGA ACTCTTTGTTGACGAGAAGCAGGGCTACGCCAAAGGCGTCCTAACGCAAAAAGCTGGGACCTTGGCGTCGGCCGGTGG  
CCTACCTGTCCAAAAGCTAGACCCAGTGGCAGCTGGGTGGCCCCCTTGCCCTACGGATGGTAGCAGCCATTGCCGTTCTG  
ACAAAAGATGCAGGCAAGCTAACCATGGGACAGCCGCTAGTCATCCTGGCCCCCATGCAGTAGAGGCACCTAGTCAAGCA  
ACCCCTGACCGCTGGCTATCCAACGCCCGCATGACCCACTATCAGGCGATGCTCCTAGATACGGACCGGGTCCAGTTTCG  
GACCGGTGGTAGCCCTAAACCCGGCTACGTTGCTCCCCCTACCGGGGAAAGAGCCTCACCATGACTGCCTCGAGATCTTG  
GCCGAGACACACGGAACCAGACCAGACCTCACGGACCAGCCCCCTCCAGACGCCGACCACACCTGGTATACAGATGGAAG  
CAGCTTCCTGCAAGAGGGACAACGTAGGGCTGGAGCAGCGGTGACCACCGAGACCGAGGTAATCTGGGCCAAGGCGTTGC  
CAGCCGGGACATCCGCCAGCGAGCTGAACCTAATAGCACTACCCAGGCCCTAAAGATGGCAGAAGGTAAGAAGCTAAAT  
GTTTATACTGATAGCCGCTATGCCTTTGCTACCGCCCATATCCATGGAGAAATATATAGGAGCTGGGTTGCTCACCTC  
AGAAGGCAAGGAGATCAAGAACAAGGGCGAAATCTTGGCCTTACTGAAAGCTCTCTTTCTGCCAAAAGACTCAGTATAA  
TTCCTGCCCAGGACATCAGAAAGGCAATAGTGCTGAAGCTAAAGGCAACCGAATGGCGGACCAGGCAGCCCGGAAGCG  
GCCATGGGGACTGACACAAAGGCCTCCTCACTTCTCATAGAGACCTCAACCCCGTACACTCCAGACTTCTTCCATTATAC  
TGAGACAGATATAAAGAACCTACAAGAGTTGGGAGCCACATATGATAGAGAGAAAAAATATTGGGTCTTGCAAGGTAAAC  
CTGTGATGCCTGACCACTTACCTTTGAATTATTAGACTTCCTTACCAGCTCACCACCTTAGCTATCAGAAGATGAGG  
GCACTTCTAGACAGGAAAGAAAGCCCTATTACATGCTAAATAAAGATAAGATCCTCCACGAGGTGGCGGAATCATGCCA  
AGCCTGTGTCCAAGTAAATGCCAGTAAGACTAAGATCAGGGCCGGAACACGAGTAAGAGGACATCGACCAGGCACCCATT  
GGGAAATTGACTTTACTGAAGTGAAGCCCGGACTGTATGGGTACAAGTATCTCCTGGTATTCTGTGGACACGTTCTCTGGC  
TGGGTTGAAGCCTTCCCAACCAACATGAGACTGCCAAAATAGTGACCAAGAACTTCTGGAAGAAATATTTCCAAGGTT  
TGGAATGCCCCAAGTGTTGGGGACTGATAATGGGCCTGCCTTCGTCTCCAGGTAAGTCAGTCGGTGGCCAAGCTACTGG  
GGATTGATTGGAAGTACATTGTGCTTACAGACCCAGAGTTTCAAGTCAGGTAGAAAGAATGAATAGGACAATCAAGGAG  
ACTTTGACCAAATTAACGCTTGCAACTGGCACTAGAGACTGGGTACTCCTACTTCCCTTAGCCCTCTACCGAGCCCGCAA  
CACTCCGGGCCCCCATGGACTCACTCCGTATGAAATCCTGTATGGGGCGCCCCCGCCCCCTTGTTAATTTCCATGATCCTG  
AAATGTCAAAGTTTACTAATAGCCCCCTCTCTCCAAGCTCACTTACAGGCCCTCCAAGCAGTACAACGAGAGGTCTGGAAG  
CCACTGGCCGCTGCCTATCAGGACCAGCTGGACCAGCCAGTGATACCACACCCCTTCCGTGTGGCGACACCGTGTGGGT  
ACGCCGGCACCAGACTAAGAACTTGAACCTCGCTGGAAAGGACCCTACACCGTCTGTGACCACCCCAACCGCTCTCA  
AAGTAGACGGCATCGCTGCGTGGATCCACGCCGTCAAGTAAAGCGGGCAGACAACCCCTCCGCCCGGAACAGCATCAGGA  
CCGAGTGAAGGTCCAGCGTTCTCAAAACCCCTTAAAGATAAGATTAAACCCGTGGGGCCCCCTAATAATCTGGGGATC  
TTAATAAGAGCAGGAGTACGTACAACATGACAGCCCTCATCAGGTCTTCAATGTTACTTGGAGAGTTACCAACTTAAT  
GACAGGACAAACAGCTAATGCTACCTCCCTCCTGGGGACAATGACCGATGCCTTTCTAACTGTACTTTGACTTGTGCG  
ATTTAATAGGGGACGACTGGGATGAGACTGGACTCGGGTGTGCACTCCCGGGGAAGAAAAAGGGCAAGAACATTTGAC  
TTCTATGTTTGGCCCGGCATACTGTACCAACAGGGTGTGGAGGGCCGAGAGAGGGCTACTGTGGCAAATGGGGCTGTGA  
GACCACTGGACAGGCATACTGGAAGCCATCATCATCATGGGACCTAATTTCCCTTAAGCGAGGAAACACCCCTCGGAATC  
AGGGCCCCCTGTTATGATTCTCAGCGGTCTCCAGTGACATCAAGGGCGCCACACCGGGGGGTGATGCAATCCCTAGTC  
CTGGAATTACTGACGCGGGCAAAAAGGCCAGCTGGGATGGCCCCAAAGTATGGGGACTAAGACTGTACCGATCCACAGG  
GACCGACCCGGTGACCCGGTTCTCTTTGACCCGCCAGGTCTCAATATAGGGCCCCGCGTCCCCATTGGGCCTAATCCCG  
TGATCACTGACCAGTTACCCCCCTCCCGACCCGTGCAGATCATGCTCCCCAGGCCTCCTCAGCCTCCTCCTCCAGGCGCA  
GCCTCTATAGTCCCTGAGACTGCCCCACCTTCTCAACAACCTGGGACGGGAGACAGGCTGCTAAACCTGGTAGATGGAGC  
CTACCAAGCTCTCAACCTCACCAGTCCTGACAAAACCCAAGAGTGCTGGTTGTGTCTGGTAGCGGGACCCCCCTACTACG  
AAGGGGTTGCCGTCCTAGGTACTTATTCCAATATACCTCTGCCCCAGCTAACTGCTCCGTGGCCTCCCAACACAAGCTG  
ACCCTGTCCGAAGTGACCGGACAGGGACTCTGCGTAGGAGCAGTTCCCAAAACCCATCAGGCCCTGTGTAATACCACCCA  
GAAGACGAGCGACGGTCTACTATCTGGCTGCTCCCGCCGGGACCATTTGGGCTTGCAACACCGGGCTCACTCCCTGCC  
TATCTACCACTGTACTCGACCTCACCACCGATTACTGTGTCTGGTTGAGCTCTGGCCAAAGGTGACCTACCACTCCCT  
GGTTATGTTTATGGCCAGTTTGAGAAAAAAACCAAATATAAAAGAGAGCCGGTGTCAATTAATCTGGCCCTGCTGTTGGG  
AGGACTTACTATGGGCGGCATAGCTGCAGGAGTAGGAACCGGACTACAGCCCTAGTGGCCACCAACAATTCGAGCAGC  
TCCAGGCAGCCATACATACAGACCTTGGGGCTTTAGAAAAGTCAGTCAGTGCCCTAGAAAAGTCTCTGACCTCGTTGTCT  
GAGGTGGTCCTACAGAACCGGAGGGGATTAGATCTACTGTTCTAAAAGAAGGAGGATTATGTGCTGCCCTAAAAGAAGA  
ATGCTGTTTTCTACGCGGACCACACTGGCGTAGTAAGAGATAGCATGGCAAAGCTAAGAGAAAGGTTGAACCAGAGACAAA  
AATTGTTTCAATCAGGACAAGGGTGGTTTTGAGGGACTGTTTAAACAGGTCCCCATGGTTTACGACCTTAATATCTACCATT  
ATGGGCCCCCTTGATAATACTTTTTATTAATCCTACTCTTCGGACCCTGTATTCTCAACCGCTTGGTCCAGTTTGTAAAAGA  
CAGAATTTCCGTAGTGCAGGCCCTGGTTTTGACCCAACAGTATCACCAACTCAAATCAATAGATCCAGAAGAAGTGAAT  
CACGTGAATAAAAGATTTTTATTAGTTTTCCAGAAAGAGGGGGGAATGAAAGACCCACCATCAGGCTTAGCAAGCTAGCT  
GCAGTAACGCCATTTTGCAAGGCATGAAAAAGTACCAGAGCTGAGTTCTCAAAAGTTACAAGAAAGTTAGTTAAAGATT  
AACAGTTAAAGATTAAGGCTGAATAATACTGGGACAGGGGCCAAATATCGGTGGTCAAGCACCTGGGCCCCGGCTCAGGG  
CCAAGAACAGATGGCTCTCAGACGTGAGTGTAGCAGAACTAGCTTCACTGATTTAGAAAAATAGAGGTGCACAGTGCTC  
TGGCCACTCCTTGAACCTGTGTGTCTGCCAATGTTCTGACCAGGTGTGTGCCATTGTTGAACCTTCATTAGACCCTTTC  
CTCGTACCCCTCCCATACCCATTTCTTGAAAATAGACATTGTTTAGAACTAAAAAGTCCACCTCAGTTTCCCCAAATGA

CCGAGAAATACCCCAAGCCTTATTCGAACTAACCAACCAGCTCGCTTCTCGCTTCTGTAACCGCGCTTTTTGCTCCCCAG  
CCCCAGCCCTATAAAAAGGGTAAAACTCCACACTCGGCGCGCCAGTCTCCGATAGACTGCGTCGCCCCGGGTACCCGTG  
CTCCCAATAAAGCCTCTTGCTGTTTGCATCCGAATCGTGGTCTCGCTGGTCTTGGAGAGGTCTCCTCAGATTGATTGAC  
TACCCACGTGCGGGGTCTTTCA

>Pmv6

TGAAAGACCCCACCATCAGGCTTAGCAAGCTAGCTGCAGTAACGCCATTTTGCAAGGCATGAAAAAGTACCAGAGCTGAG  
TTCTCAAAAGTTACAAGAAAGTTCAGTTAAAGATTAACAGTTAAAGATTAAGGCTGAATAATACTGGGACAGGGGCCAAA  
TATCGGTGGTCAAGCACCTGGGCCCCGGCTCAGGGCCAAGAACAGATGGCTCTCAGACGTCAGTGTTAGCAGAACTAGCT  
TCACTGATTTAGAAAAATAGAGGTGCACAGAGCTCTGGCCACTCCTTGAACCTGTGTGTCTGCCAATGTTCTGACCAGGT  
GTGTGCCCATTGTTGAACCTTCATTAGACCTCTCCTCGTACCCCTCCCATACCCATTTCTTGAAAAATAGACATTGTTTA  
GAACTAAAAAGTCCCACCTCAGTTTCCCCAAATGACCGAGAAATACCCCAAGCCTTATTCGAACTAACCAACCAGCTCGC  
TTCTCGCTTCTGTAACCGCGCTTTTTGCTCCCCAGCCCCAGCCCTATAAAAAGGGTAAAACTCCACACTCGGCGCGCCA  
GTCCTCCGATAGACTGCGTCGCCCCGGGTACCCGTGTTCTCAATAAAGCCTCTTGCTGTTTGCATCCGAATCGTGGTCTCG  
CTGGTCTTGGAGAGGTCTCCTCAGATTGATTGACTACCCACCTCGGGGGTCTTTTCATTGGAGGTCCCACCGAGATTG  
GAGACCCCTGCCCAGGGACACCGACCCCCCGCGGGAGGTAAGCTGGCCAGCGGTGCTTTCGTGTCTGTCTCTGTCTTC  
GTGCGTGTGTTGTGCCGGCATCCAATGTTTGCCTGCGTCTGTACTAGTTAGCTAACTAGATCTGTATCTGGCGGTTCCG  
CGGAAGAACTGACGAGTTCGTATTCCCGGCCGCGAGCCCTGGGAGACGTCCAGCGGCCTCGGGGGCCCGTTTTGTGGCC  
CATTCTGTATCAGTTAACCTACCCGAGTCGGACTTTTTGGAGCTCCGCCACTGTACGTGGCTTTGTTGGGGGACGAGAGA  
CAGAGACACTTCCCGCCCCCGTCTGAATTTTTGCTTTTCGGTTTTACGCCGAAGCCGCGCCGCGCTCTGATTTGTTTGT  
GTTCTTTTGTCTTTCGTTAGTTTTCTTCTGTCTTTAAGTGTTTTCGAGATCATGGGACAGACCGTAACCTACCCCTCTGAG  
TTTAACCTTGACAGCTGGGGAGATGTCCAGCGCATTGCATCCAACAGTCTGTGGATGTCAGGAAGAGGCGCTGGATTA  
CCTTCTGTTCCGCTGAATGGCCAACCTTTCAATGTGGGATGGCCTCAGGATGGTACTTTCAATTTAAGTATTATCTCTCAG  
GTTAAGTCTAGAGTGTTTTGTCTGGTCCCCACGGACACCCGGATCAGGTCCCATATATCGTCACCTGGGAGGCATTGC  
CTATGACCCCCCTCCGTGGGTCAAACCGTTTTGTGTCTCCTAAACTTCCTCCCTTGCCGACAGCTCCCGTCTCCCGCCCCG  
GTCCTTCTGCGCAACCTCCGTCCCGATCTGCCCTTTACCCTGCCCTTACCCCTCTATAAAGTCCAAACCTCCTAAGCCC  
CAGGTTCTCCCTGATAGCGGGGACCCCTCATTGACCTTCTCACAGAGGACCCCCGCGGTACAGAGCACAACCCCTCCTC  
CTCTGCCAGGAGAGACGACGAGAAGAGGCGGCCACCACTCCGAGGTTTTCCCCCTTCTCCCATGGTGTCTCGACTGC  
GGGGAAGGAGAGACCTTCCCGCAGTGGACTCCACCACCTCCGAGGATTTCCACTCCGATGGGGGGAGATGGCCAGCTT  
CAGTATTGGCCGTTTTCTCTCGGATTTATACAATTGAAAAATAATAACCTTCTTTTTCTGAAGATCCAGGTAAATT  
GATGGCCTTGATTGAGTCCGTCTCATCACCACAGCCACCTGGGACGACTGTCAGCAGTTGTTGGGGACCTGCTGA  
CCGGAGAAGAAAAGCAGCGGGTGCTCCTAGAGGCTAGAAAGGCAGTCCGGGGCAATGATGGACGCCCCACTCAGTTGCCT  
AATGAAGTCAATGCTGCTTTTTCCCTTGAACGCCCCGTTGGGATTACACCCTACAGAAGGTAGGAACCACCTAGTCCT  
CTATCGCCAGTTGCTCTTAGCGGGTCTCCAGAACGCGGGCAGAAGTCCCACCAATTTGGCCAAGGTAAAAGGGATAACCC  
AGGGACCTAATGAGTCTCCCTCAGCCTTTTTAGAGAGACTCAAAGAGGCCTATCGCAGGTACACTCCTTATGACCCTGAG  
GACCCAGGGCAAGAAACCAATGTGTCTATGTCAATTCATCTGGCAGTCTGCCCGGATATCGGGCGAAAGTTAGAGCGGTT  
AGAAGATTTAAAGAGCAAGACCTTAGGAGACTTAGTGAGGGAAGCTGAAAAGATCTTTAATAAGCGAGAAACCCCGGAAG  
AAAGAGAGGAACGTATCAAGAGAGAAACAGAGGAAAAAGAAGAACGCCGTAGGGCAGAGGATGAGCAGAGAGAGAAAGAA  
AGGGACCGCAGAAGACATAGAGAGATGAGCAAGCTCTTGCCACTGTAGTTATTGGTCAGAGACAGGATAGACAGGGGGG  
AGAGCGGAGGAGGCCCAACTTGATAAGGACCAATGCGCCTACTGCAAAGAAAAGGGACACTGGGCTAAGGACTGCCCAA  
AGAAGCCACGAGGGCCCCGAGGACTGAGGCCCCAGACCTCCCTCCTAACCTTAGGTGACTAGGGAGGTGAGGGTACAGGAG  
CCCCCCCCCTGAACCCAGGATAACCTCAAAGTCGGGGGGCAACCCGTACCTTCTTGGTAGATACTGGGGCCCCAACACTC  
CGTGCTGACCCAAAATCCTGGACCCCTAAGTGACAAGGCTGCCTGGGTCCAAGGGGCTACTGGAGGAAAGCGGTATCGCT  
GGACCACGGATCGCAAAGTACATCTAGCTACCGGTAAGGTCACCCACTCTTTCCTCCATGTACCAGACTGCCCCCTATCCT  
CTGCTAGGAAGAGACTTGCTGACTAAACTAAAAGCCCCAAATCCACTTCGAGGGATCAGGAGCTCAGGTTATGGGACCAAT  
GGGACTGCCCCTGCAAGTGCTGACCTAAACATAGAAGATGAATATCGGTACATGAGACCTCAAAGAGACCGGATGTTT  
CTCTAGGGTCCACCTGGCTTTCTGATTTTTCCCGAGGTCTGGGCGGAAACCGGGGGCATGGGACTGGCAGTTCCGCCAAGCT  
CCTCTGATCATACCTCTGAAGGCAACCTCTACCCCGTGTCCATAAAACAATACCCCATGTACAAGAAGCCAGACTGGG  
GATCAAGCCCCACATACAGAGACTGTTGGACCAGGGAATACTGGTACCCTGCCAGTCCCCCTGGAACACGCCCCCTGCTAC  
CCGTTAAGAAACCAGGGACTAATGATTATAGGCCTGTCCAGGATCTGAGAGAAGTCAACAAGCGGGTGGAAGACATCCAC  
CCCACCGTGCCCAACCTTACAACCTCTTGAGCGGGCTCCCACCGTCCCACCGAGGTGATACACTGTGCTTGATTTAAAGGA  
TGCCTTTTTCTGCCTGAGACTCCACCCACAGTCAGCCTCTCTTCGCTTTGAGTGGAGAGATCCAGAGATGGGAATCT  
CAGGACAATTGACCTGGACCAGACTCCACAGGGTTTTCAAAAACAGTCCCACCTGTTTGATGAGGCACTGCACAGAGAC  
CTAGCAGACTTCCGGATCCAGCACCCAGACTTGATCCTGCTACAGTACGTGGATGACTTACTGCTGGCCGCCACTTCTGA  
GCTCGACTGCCAACAAGGTAAGTCTGGGCCCTGTTACAAACCTAGGGAACCTCGGGTATCGGGCCTCGGCCAAGAAAGCCC  
AAATTTGCCAGAAACAGGTCAAGTATCTGGGGTATCTTCTAAAAGAGGGTCAGAGATGGCTGACTGAGGCCAGAAAAGAG  
ACTGTGATGGGGCAGCCTACTCCGAAGACCCCTCGACAATAAGGGAGTTCTAGGGACGGCAGGCTTCTGTGCGCTCTG  
GATCCCTGGGTTTTGCAGAAATGGCAGCCCCCTTGATACCCTCTACCAAAACGGGGACTCTGTTTAATTGGGGCCCAGACC

AGCAAAAGGCCTATCAAGAAATCAAACAGGCTCTTCTAACTGCCCCAGCCCTGGGATTGCCAGATTTGACTAAGCCCTTT  
GAACTCTTTGTTGACGAGAAGCAGGGCTACGCCAAAGGCGTCTTAACGCAAAAAGCTGGGACCTTGGCGTCGGCCGGTGGC  
CTACCTGTCCAAAAGCTAGACCCAGTGGCAGCTGGGTGGCCCCCTTGCCCTACGGATGGTAGCAGCCATTGCCGTTCTGA  
CAAAAGATGCAGGCAAGCTAACCATGGGACAGCCGCTAGTCATCTGGCCCCCATGCAGTAGAGGCACTAGTCAAGCAA  
CCCCCTGACCGCTGGCTATCCAACGCCCCGATGACCCACTATCAGGCGATGCTCCTAGATACGGACCGGGTCCAGTTCGG  
ACCGGTGGTAGCCCTAAACCCGGCTACGTTGCTCCCCCTACCGGGGAAAGAGCCTCACCATGACTGCCTCGAGATCTTGG  
CCGAGACACACGGAACCAGACCAGACCTCACGGACCAGCCCCCTCCAGACGCCGACCACACCTGGTATACAGATGGAAGC  
AGCTTCTTGCAAGAGGGACAACGTAGGGCTGGAGCAGCGGTGACCACCGAGACCGAGGTAATCTGGGCCAAGGCGTTGCC  
AGCCGGGACATCCGCCCAGCGAGCTGAACTAATAGCACTACCCAGGCCCTAAAGATGGCAGAAGGTAAGAAGCTAAATG  
TTTATACTGATAGCCGCTATGCCTTTTGCTACCGCCCATGTCCATGGAGAAATATATAGGAGACGTGGGTTGCTCACCTCA  
GAAGGCAAGGAGATCAAGAACAAGGGCGAAATCTTGGCCTTACTGAAAGCTCTCTTTCTGCCCAAAAGACTCAGTATAAT  
TCACTGCCCAGGACATCAGAAAGGCAATAGTGCTGAAGCTAAAGGCAACCGAATGGCGGACCAGGCAGCCCCGGAAGCAG  
CCATGGGGACTGACACAAAGGCCTCCTCACTTCTCATAGAGACCTCAACCCCGTACACTCCAGACTTCTTCCATTATACT  
GAGACAGATATAAAGAACCTACAAGAGTTGGGAGCCACATATGATAGAGAGAAAAAATATTGGGTCTTGCAAGGTAAACC  
TGTGATGCCTGACCAGTTCACCTTTGAATTATTAGACTTCCTTACCAGCTCACCCACCTTAGCTATCAGAAGATGAGGG  
CACTTCTAGACAGGAAAGAAAGCCCCCTATTACATGCTAAATAAAGATAAGATCCTCCACGAGGTGGCGGAATCATGCCAA  
GCCTGTGTCCAAGTAAATGCCAGTAAGACTAAGATCAGGGCCGGAACACGAGTAAGAGGACATCGACCAGGCACCCATTG  
GGAAATTGACTTTACTGAAGTGAAGCCCGGACTGTATGGGTACAAGTATCTCCTGGTATTCTGTGGACACGTTCTCTGGCT  
GGGTTGAAGCCTTCCCAACCAACATGAAACTGCCAAAATAGTGACCAAGAAACTTCTGGAAGAAATATTTCCAAGGTTT  
GGAATGCCCCAAGTGTTGGGGACTGATAATGGGCCTGCCTTCGTCTCCAGGTAAGTCAGTCGGTGGCCAAGCTACTGGG  
GATTGATTGGAACTACATTGTGCTTACAGACCCCAGAGTTCAGGTGAGGTAGAAAAGTGAATAGGACAATCAAGGAGA  
CTTTGACCAATTAACGCTTGCAACTGGCACTAGAGACTGGGTACTCCTACTTCCCTTAGCCCTCTACCGAGCCCCGCAAC  
ACTCCGGGCCCCCATGGACTCACTCCGTATGAAATCCTGTATGGGGCGCCCCCGCCCCCTTGTTAATTTCCATGATCCTGA  
AATGTCAAAGTTTACTAATAGCCCCCTCTCTCCAAGCTCACTTACAGGCCCTCCAAGCAGTACAACGAGAGGTCTGGAAGC  
CACTGGCCGCTGCCTATCAGGACCAGCTGGACCAGCCAGTGATACCACACCCCTTCCGTGTGCGGACACCGTGTGGGT  
CGCCGGCACCAGACTAAGAACTTGGAACCTCGCTGGAAAGGACCCTACACCGTCTGTGACACCCCCACCGCTCTCAA  
AGTAGACGGCATCGCTGCGTGGATCCACGCCCTCACGTAAAAGCGGCACAACCCCTCCGGCCGGAACAGCATCAGGAC  
CGACTAGGAAGGTCCAGCTTCTCAAACCCCTTAAAGATAAGATTAAACCCGTGGGGCCCCCTAATAGTCTCTGGGAATCT  
TAATAAGGGCAGGAGTATCAGTACAACATGACAGCCCTCATCAGGTCTTCAATGTTACTTGGAGAGTTACCAACTTAATG  
ACAGGACAAACAGCTAATGCTACCTCCCTCCTGGGGACAATGACCGATGCCTTTTCTAAACTGTACTTTGACTTGTGCGA  
TTTAATAGGGGACGACTGGGATGAGACTGGACTCGGGTGTGCGACTCCCGGGGGAAGAAAAAGGGCAAGAACATTTGACT  
TCTATGTTTGGCCCCGGGCATACTGTACCAACAGGGTGTGGAGGGCCGAGAGAGGGCTACTGTGGCAAATGGGGCTGTGAG  
ACCACTGGACAGGCATACTGGAAGCCATCATCATGAGGACCTAATTTCCCTTAAGCGAGGAAACACCCCTCGGAATCA  
GGGCCCCGTGTTATGATTCTCAGCGGTCTCCAGTGACATCAAGGGCGCCACACCGGGGGTTCGATGCAATCCCCTAGTCC  
TGGAATTCATAACGCGGGCAAAAAGGCCAGCTGGGATGGCCCCAAAGTATGGGGACTAAGACTGTACCGATCCACAGGG  
ACCGACCCGGTGACCCGTTCTCTTTGACCCGCCAGGTCTCAATATAGGGCCCCGCGTCCCCATTGGGCCTAATCCCGT  
GATCACTGACCAGTTACCCCCCTCCCGACCCGTGCAGATCATGCTCCCCAGGCCTCCTCAGCCTCCTCCTCCAGGCGCAG  
CCTCTATAGTCCCTGAGACTGCCCCACCTTCTCAACAACCTGGGACGGGAGACAGGCTGCTAAACCTGGTAGATGGAGCC  
TACCAAGCTCTCAACCTCACCAGTCCTGACAAAACCAAGAGTGCTGGTTGTGTCTGGTAGCGGGACCCCCCTACTACGA  
AGGGGTTGCCGTCTAGGTACTTATTCCAACCATACTCTGCCCCAGCTAACTGCTCCGTGGCCTCCCAACACAAGCTGA  
CCCTGTCCGAAGTGACCGGACAGGGACTCTGCGTAGGAGCAGTTCCCAAAACCCATCAGGCCCTGTGTAATACCACCCAG  
AAGACGAGCGACGGGTCCTACTATCTGGCTGCTCCCGCCGGGACCATTTGGGCCTGCAACACCGGGGCTCACTCCCTGCCT  
ATCTACCACTGTACTCGACCTCACCACCGATTACTGTGTCTTGGTTGAGCTCTGGCCAAAGGTGACCTACCACTCCCCTG  
GTTATGTTTATGGCCAGTTTGAGAGAAAAACCAATATAAAAGAGAGCCGGTGTCAATTAACCTCTGGCCCTGCTGTTGGGA  
GGACTTACTATGGCGGCATAGCTGCAGGAGTAGGAACGGGACTACAGCCCTAGTGGCCACCAACAATTCGAGCAGCT  
CCAGGCAGCCATACATACAGACCTTGGGGCTTTAGAAAAGTCAGTCAGTGCCCTAGAAAAGTCTCTGACCTCGTTGTCTG  
AGGTGGTCTACAGAACCGGAGGGGATTAGATCTACTGTTTCTAAAAGAAGGAGGATTATGTGCTGCCCTAAAAGAAGAA  
TGCTGTTTCTACGCGGACCACACTGGCGTAGTAAGAGATAGCATGGCAAAGCTAAGAGAAAGGTTGAACCAGAGACAAAA  
ATTGTTTGAATCAGGACAAGGGTGGTTTGGAGGACTGTTTAAACAGGTCCCCATGGTTTACGACCTTAATATCCACCATTA  
TGGGCCCCCTTGATAATACTTTTATTAACTCTACTCTTCGGACCCCTGTATTCTCAACCGCTTGGTCCAGTTTGTAAAAGAC  
AGAATTTGCGTAGTGACGGCCCTGGTTTGGACCAACAGTATACCAACTCAAATCAATAGATCCAGAAGAAGTGAATC  
ACGTGAATAAAAGATTTTATTAGTTTCCAGAAAGAGGGGGGAATGAAAGACCCACCATCAGGCTTAGCAAGCTAGCTG  
CAGTAACGCCATTTTGAAGGCATGAAAAAGTACCAGAGCTGAGTTCTCAAAAGTTACAAGAAAGTTAGTTAAAGATTA  
ACAGTTAAAGATTAAGGCTGAATAATACTGGGACAGGGGCCAAATATCGGTGGTCAAGCACCTGGGCCCCGGCTCAGGGC  
CAAGAACAGATGGCTCTCAGACGTGAGTGTAGCAGAACTAGCTTCACTGATTTAGAAAAATAGAGGTGCACAGAGCTCT  
GGCCACTCCTTGAACCTGTGTGTCTGCCAATGTTCTGACCAGGTGTGTGCCATTGTTGAACCTTCATTAGACCCTCTCC  
TCGTACCCCTCCCATACCCATTTCTTGAAAATAGACATTGTTTAGAATAAAAAGTCCCACCTCAGTTTCCCCAAATGAC

CGAGAAATACCCCAAGCCTTATTTCGAACTAACCAACCAGCTCGCTTCTCGCTTCTGTAACCGCGCTTTTTGCTCCCCAGC  
CCCAGCCCTATAAAAAGGGTAAAACTCCACACTCGGCGCGCCAGTCTCCGATAGACTGCGTCGCCCCGGGTACCCGTGT  
TCTCAATAAAGCCTCTTGCTGTTTGCATCCGAATCGTGGTCTCGCTGGTCCTTGAGAGGGTCTCCTCAGATTGATTGACT  
ACCCACCTCGGGGGTCTTTCA

>Pmv7

TGAAAGACCCCACCATCAGGCTTAGCAAGCTAGCTGCAGTAACGCCATTTTGCAAGGCATGAAAAAGTACCAGAGCTGAG  
TTCTCAAAAGTTACAAGAAAGTTCAGTTAAAGATTAACAGTTAAAGATTAAGGCTGAATAATACTGGGACAGGGGCCAAA  
TATCGGTGGTCAAACACCTGGGCCCCGGCTCAGGGCCAAGAACAGATGGCTCTCAGACGTCAGTGTTAGCAGAACTAGCT  
TCACTGATTTAAAAAATAGAGGTGCACAGTGTCTTGCCCACTCCTTAAACCTGTGTGTCTGCCAATGTTCTGACCAGGT  
GTGTGCCCATTGTTGAACCTTCATTAGACCTTTTCTCGTACCCTCCCATACCCATTTCTTGAAAATAGACATTGTTTA  
GAACTAAAAAGTCCCACCTCAGTTTCCCCAAATGACCGAGAAATACCCCAAGCCTTATTTCGAACTAACCAACCAGCTCGC  
TTCTCGCTTCTGTAACCGCGCTTTTTGCTCCCCAGCCCCAGCCCTATAAAAAGGGTAAAACTCCACACTCGGCGCGCCA  
GTCCTCCGATAGACTGCGTCGCCCCGGGTACCCGTGTTCTCAATAAAGCCTCTTGCTGTTTGCATCCGAATCGTGGTCTCG  
CTGGTCCTTGAGAGGGTCTCCTCAGATTGATTGACTACCCACGTCGGGGGTCTTTCATTTGGAGGTTCCACCGAGATTTG  
GAGACCCCTGCCCAGGGACCAACGACCCCCCGCCGGGAGGTAAGCTGGCCAGCGGTGCTTTCGTGTCTGTCTCTGTCTTC  
GTGCGTGTGTTGTGCCGGCATCCAATGTTTGGCCTGCGTCTGTACTAGTTAGCTAACTAGATCTGTATCTGGCGGTTCCG  
CGGAAGAACTGACGAGTTCGTATTCCCGGCCGCGAGCCCTGGGAGACGTCCAGCGGCCTCGGGGGCCCCGTTTTGTGGCC  
CATTCTGTATCAGTTAACCTACCCGAGTCGGACTTTTTGGAGCTCCGCCACTGTACGTGGCTTTGTTGGGGGACGAGAGA  
CAGAGACACTTCCCGCCCCCGTCTGAATTTTTGCTTTTCGGTTTTACGCCGAAGCCGCGCCGCGCTCTGATTTGTTTGT  
GTTCTTTTGTCTTTCGTTAGTTTTCTTCTGTCTTTAAGTGTTTTCGAGATCATGGGACAGACCGTAACCTACCCCTCTGAG  
TTTAACCTTGACAGCTGGGGAGATGTCCAGCGCATTGCATCCAACAGTCTGTGGATGTGAGGAAGAGGCGCTGGATTA  
CCTTCTGTTCCGCTGAATGGCCAACCTTTCAATGTGGGATGGCCTCAGGATGGTACTTTCAATTTAAGTATTATCTCTCAG  
GTTAAGTCTAGAGTGTTTTGTCTGGTCCCCACGGACACCCGGATCAGGTCCCATATATCGTCACCTGGGAGGCATTGC  
CTATGACCCCCCTCCGTGGGTCAAACCGTTTTGTGTCTCCTAAACTTCCTCCCTTGCCGACAGCTCCCGTCTCTCCGCCCCG  
GTCCTTCTGCGCAACCTCCGTCCCGATCTGCCCTTTACCCTGCCCTTACCCCTCTATAAAGTCCAAACCTCCTAAGCCC  
CAGGTTCTCCCTGATAGCGGGGACCCCTCATTGACCTTCTCACAGAGGACCCCCCGCGGTACAGAGCACAAACCTCTCTC  
CTCTGCCAGGAGAACGACGACGAAGAAGAGGCGGCCACCACTCCGAGGTTTTCCCCCTTCTCCCATGGTGTCTCGACTGC  
GGGAAGGAGAGACCTTCCCGCAGTGGACTCCACCACCTCCGAGGATTTCCACTCCGATGGGGGGAGATGGCCAGCTT  
CAGTATTGGCCGTTTTCTCTTCGATTTATACAATTGGAATAATAAACCTTCTTTTTCTGAAGATCCAGGTAAATT  
GACGGCCTTGATTGAGTCCGTCTCATCACCACAGCCACCTGGGACGACTGTGAGCAGTTGTTGGGGACCTGCTGA  
CCGGAGAAGAAAAGCAGCGGGTGCTCCTAGAGGCTAGAAAGGCAGTCCGGGGCAATGATGGACGCCCCACTCAGTTGCCT  
AATGAAGTCAATGCTGCTTTTTCCCTTGAACGCCCCGTTGGGATTACACCCTACAGAAGGTAGGAACCACCTAGTCCT  
CTATCGCCAGTTGCTCTTAGCGGGTCTCCAGAACGCGGGCAGAAGTCCCACCAATTTGGCCAAGGTAAAAGGGATAACCC  
AGGGACCTAATGAGTCTCCCTCAGCCTTTTTAGAGAGACTCAAAGAGGCCTATCGCAGGTACACTCCTTATGACCCTGAG  
GACCCAGGGCAAGAAACCAATGTGTCTATGTCAATCATCTGGCAGTCTGCCCGGATATCGGGCGAAAGTTAGAGCGGTT  
AGAAGATTTAAAGAGCAAGACCTTAGGAGACTTAGTGAGGGAAGCTGAAAAGATCTTTAATAAGCGAGAAACCCCGGAAG  
AAAGAGAGGAACGTATCAAGAGAGAAACAGAGGAAAAGAAGAACGCCGTAGGGCAGAGGATGAGCAGAGAGAGAAAGAA  
AGGGACCGCAGGAGACATAGAGAGATGAGCAAGCTCTTGCCACTGTAGTTATTGGTCAGAGACAGGATAGACAGGGGGG  
AGAGCGGAGGAGGCCCAACTTGATAAGGACCAATGCGCCTACTGCAAAGAAAAGGGACACTGGGCTAAGGACTGCCCAA  
AGAAGCCACGAGGGCCCCGAGGACTGAGGCCCCAGACCTCCCTCCTAACCTTAGGTGACTAGGGAGGTGAGGGTACAGGAG  
CCCCCCCCCTGAACCCAGGATAACCTCAAAGTCGGGGGGCAACCCGTACCTTCTTGGTAGATACTGGGGCCCCAACACTC  
CGTGCTGACCCAAAATCCTGGACCCCTAAGTGACAAGGCTGCCTGGGTCCAAGGGGCTACTGGAGGAAAGCGGTATCGCT  
GGACCACGGATCGCAAAGTACATCTAGCTACCGGTAAGGTCACCCACTCTTTCCTCCATGTACCAGACTGCCCCCTATCCT  
CTGCTAGGAAGAGACTTGCTGACTAAACTAAAAGCCCCAAATCCACTTCGAGGGATCAGGAGCTCAGGTTATGGGACCAAT  
GGGACTGCCCCCTGCAAGTGCTGACCTAAACATAGAAGATGAGTATCGGTACATGAGACCTCAAAGAGACCGGATGTTT  
CTCTAGGGTCCACCTGGCTTTCTGATTTTTCCCAAGGTCTGGGCGGAAACCGGGGGCATGGGACTGGCAGTTCCGCCAAGCT  
CCTCTGATCATACCTCTGAAGGCAACCTCTACCCCCGTGTCCATAAAACAATACCCCATGTACAAGAAGCCAGACTGGG  
GATCAAGCCCCACATACAGAGACTGTTGGACCAGGGAATACTGGTACCCTGCCAGTCCCCCTGGAACACGCCCCCTGCTAC  
CCGTTAAGAAACCAGGGACTAATGATTATAGGCCTGTCCAGGATCTGAGAGAAGTCAACAAGCGGGTGGAAGACATCCAC  
CCCACCGTGCCCAACCTTACAACCTCTTGAGCGGGCTCCCACCGTCCCACCAGTGGTACACTGTGCTTGATTTAAAGGA  
TGCCTTTTTCTGCCTGAGACTCCACCCACCAGTCAGCCTCTCTTCGCCTTTGAGTGGAGAGATCCAGAGATGGGAATCT  
CAGGACAATTGACCTGGACCAGACTCCACAGGGTTTTCAAAAACAGTCCCACCCTGTTTGATGAGGCACTGCACAGAGAC  
CTAGCAGACTTCCGGATCCAGCACCCAGACTTGATCCTGCTACAGTACGTGGATGACTTACTGCTGGCCGCCACTTCTGA  
GCTCGACTGCCAACAAGTACTCGGGCCCTGTTACAAACCTAGGGAACCTCGGGTATCGGGCCTCGGCCAAGAAAGCCC  
AAATTTGCCAGAAACAGGTCAAGTATCTGGGGTATCTTCTAAAAGAGGGTCAGAGATGGCTGACTGAGGCCAGAAAAGAG  
ACTGTGATGGGGCAGCCTACTCCGAAGACCCCTCGACAATAAGGGAGTTCTTAGGGACGGCAGGCTTCTGTGCGCTCTG  
GATCCCTGGGTTTTGCAGAAATGGCAGCCCCCTTGTAACCTCTCACAAAACGGGGACTCTGTTTAATTGGGGCCCAGACC

AGCAAAAGGCCTATCAAGAAATCAAACAGGCTCTTCTAACTGCCCCAGCCCTGGGATTGCCAGATTTGACTAAGCCTTTT  
GAACTCTTTGTTGACGAGAAGCAGGGCTACGCCAAAGGCGTCTTAACGCAAAAAGCTGGGACCTTGGCGTCGGCCGGTGGC  
CTACCTGTCCAAAAAGCTAGACCCAGTGGCAGCTGGGTGGCCCCCTTGCCCTACGGATGGTAGCAGCCATTGCCGTTCTGA  
CAAAAGATGCAGGCAAGCTAACCATGGGACAGCCGCTAGTCATCCTGGCCCCCATGCAGTAGAGGCACTAGTCAAGCAA  
CCCCCTGACCGCTGGCTATCCAACGCCCCGATGACCCACTATCAGGCGATGCTCCTAGATACGGACCGGGTCCAGTTCGG  
ACCGGTGGTAGCCCTAAACCCGGCTACGTTGCTCCCCCTACCGGGGAAAGAGCCTCACCATGACTGCCTCGAGATCTTGG  
CCGAGACACACGGAACCAGACCAGACCTCACGGACCAGCCCCCTCCAGACGCCGACCACACCTGGTATACAGATGGAAGC  
AGCTTCTTGCAAGAGGGACAACGTAGGGCTGGAGCAGCGGTGACCACCGAGACCGAGGTAATCTGGGCCAAGGCGTTGCC  
AGCCGGGACATCCGCCCAGCGAGCTGAACTAATAGCACTACCCAGGCCCTAAAGATGGCAGAAGGTAAGAAGCTAAATG  
TTTATACTGATAGCCGCTATGCCTTTTGCTACCGCCCATGTCCATGGAAAAATATATAGGAGACGTGGGTTGCTCACCTCA  
GAAGGCAAGGAGATCAAGAACAAGGGCGAAATCTTGGCCTTACTGAAAGCTCTCTTTCTGCCCAAAAGACTCAGTATAAT  
TCACTGCCCAGGACATCAGAAAGGCAATAGTGCTGAAGCTAAAGGCAACCGAATGGCGGACCAGGCAGCCCCGGAAGCAG  
CCATGGGGACTGACACAAAGGCCTCCTCACTTCTCATAGAGACCTCAACCCCGTACACTCCAGACTTCTTCCATTATACT  
GAGACAGATATAAAGAACCTACAAGAGTTGGGAGCCACATATGATAGAGAGAAAAAATATTGGGTCTTGCAAGGTAAACC  
TGTGATGCCTGACCAGTTCACCTTTGAATTATTAGACTTCCTTACCAGCTCACCCACCTTAGCTATCAGAAGATGAGGG  
CACTTCTAGACAGGAAAGAAAGCCCCCTATTACATGCTAAATAAAGATAAGATCCTCCACGAGGTGGCGGAATCATGCCAA  
GCCTGTGTCCAAGTAAATGCCAGTAAGACTAAGATCAGGGCCGGAACACGAGTAAGAGGACATCGACCAGGCACCCATTG  
GGAAATTGACTTTACTGAAGTGAAGCCCGGACTGTATGGGTACAAGTATCTCCTGGTATTCTGTGGACACGTTCTCTGGCT  
GGGTTGAAGCCTTCCCAACCAACATGAGACTGCCAAAATAGTGACCAAGAACTTCTGGAAGAAATATTTCCAAGGTTT  
GGAATGCCCCAAGTGTTGGGGACTGATAATGGGCCTGCCTTCGTCTCCAGGTAAGTCAGTCGGTGGCCAAGCTACTGGG  
GATTGATTGGAACTACATTGTGCTTACAGACCCCAGAGTTCAGGTGAGGTAGAAAGAATGAATAGGACAATCAAGGAGA  
CTTTGACCAATTAACGCTTGCAACTGGCACTAGAGACTGGGTACTCCTACTTCCCTTAGCCCTCTACCGAGCCCCGCAAC  
ACTCCGGGCCCCCATGGACTCACTCCGTATGAAATCCTGTATGGGGCGCCCCCGCCCCCTTGTTAATTTCCATGATCCTGA  
AATGTCAAAGTTTACTAATAGCCCCCTCTCTCCAAGCTCACTTACAGGCCCTCCAAGCAGTACAACGAGAGGTCTGGAAGC  
CACTGGCCGCTGCCTATCAGGACCAGCTGGACCAGCCAGTGATACCACACCCCTTCCGTGTGCGGACACCGTGTGGGT  
CGCCGGCACCAGACTAAGAACTTGGAACCTCGCTGGAAAGGACCCTACACCGTCTGTGACACCCCCACCGCTCTCAA  
AGTAGACGGCATCGCTCGTGGATCCACGCCCTCACGTAAAAGCGGCACAAACCCCTCCGGCCGGAACAGCATCAGGAC  
CGACTAGGAAGGTCCAGCGTTCTCAAACCCCTTAAAGATAAGATTAAACCCGTGGGGCCCCCTAATAATCTGGGGACTCT  
TAATAAGGGCAGGAGTATCAGTACAACATGACAGCCCTCATCAGGTCTTCAATGTTACTTGGAGAGTTACCAACTTAATG  
ACAGGACAAACAGCTAATGCTACCTCCCTCCTGGGGACAATGACCGATGCCTTTTCTAAACTGTACTTTGACTTGTGCGA  
TTTAATAGGGGACGACTGGGATGAGACTGGACTCGGGTGTGCGACTCCCGGGGAAAGAAAAAGGGCAAGAACATTTGACT  
TCTATGTTTGGCCCCGGGCATACTGTACCAACAGGGTGTGGAGGGCCGAGAGAGGGCTACTGTGGCAAATGGGGCTGTGAG  
ACCACTGGACAGGCATACTGGAAGCCATCATCATCATGGGACCTAATTTCCCTTAAGCGAGGAAACACCCCTCGGAATCA  
GGGCCCCGTGTTATGATTCTCAGCGGTCTCCAGTGACATCAAGGGCGCCACACCGGGGGTTCGATGCAATCCCCTAGTCC  
TGGAATTCAGTGACGCGGGCAAAAAGGCCAGCTGGGATGGCCCCAAAGTATGGGGACTAAGACTGTACCGATCCACAGGG  
ACCGACCCGGTGACCTGTTCTCTTTGACCCGCCAGGTCTCAATATAGGGCCCCGCGTCCCCATTGGGCCTAATCCCGT  
GATCACTGACCAGTTACCCCCCTCCCGACCCGTGCAGATCATGCTCCCCAGGCCTCCTCAGCCTCCTCCTCCAGGCGCAG  
CCTCTATAGTCCCTGAGACTGCCCCACCTTCTCAACAACCTGGGACGGGAGACAGGCTGCTAAACCTGGTAGATGGAGCC  
TACCAAGCTCTCAACCTCACCAGTCCCAGACAAAACCAAGAGTGCTGGTTGTGTCTGGTAGCGGGACCCCCCTACTACGA  
AGGGGTTGCCGTCTAGGTACTTATTCCAACCATACTCTGCCCCAGCTAACTGCTCCGTGGCCTCCCAACACAAGCTGA  
CCCTGTCCGAAGTGACCGGACAGGGACTCTGCGTAGGAGCAGTTCCCAAAACCCATCAGGCCCTGTGTAATACCACCCAG  
AAGACGAGCGACGGGTCTACTATCTGGCTGCTCCCGCCGGGACCATTTGGGCTTGCAACACCGGGCTCACTCCCTGCCT  
ATCTACCACTGTACTCGACCTCACCACCGATTACTGTGTCTTGGTTGAGCTCTGGCCAAAGGTGACCTACCACTCCCCTG  
GTTATGTTTATGGCCAGTTTGAGAAAAAACC AAATATAAAAAGAGAGCCGGTGTCAATTAACCTCTGGCCCTGCTGTTGGGA  
GGACTTACTATGGCGGCATAGCTGCAGGAGTAGGAACGGGACTACAGCCCTAGTGCCACCAACAATTCGAGCAGCT  
CCAGGCAGCCATACATACAGACCTTGGGGCTTTAAAAAAGTCAGTCAGTGCCCTAAAAAAGTCTCTGACCTCGTTGTCTG  
AGGTGGTCTACAGAACCGGAGGGGATTAGATCTACTGTTTCTAAAAAGAAGGAGGATTATGTGCTGCCCTAAAAAGAAGAA  
TGCTGTTTCTACGCGGACCACACTGGCGTAGTAAGAGATAGCATGGCAAAGCTAAGAGAAAGGTTGAACCAGAGACAAAA  
ATTGTTTGAATCAGGACAAGGGTGGTTTGGAGGACTGTTTAAACAGGTCCCCATGGTTTACGACCTTAATATCCACCATTA  
TGGGCCCCCTTGATAATACTTTTATTAATCCTACTCTTCGGACCCCTGTATTCTCAACCGCTTGGTCCAGTTTGTAAAAGAC  
AGAATTTGCGTAGTGACGGCCCTGGTTTTGACCCAACAGTATACCAACTCAAATCAATAGATCCAGAAGAAGTGGAATC  
ACGTGAATAAAAAGATTTTATTAGTTTTCCAGAAAGAGGGGGGAATGAAAGACCCACCATCAGGCTTAGCAAGCTAGCTG  
CAGTAACGCCATTTTGAAGGCATGAAAAAGTACCAGAGCTGAGTTCTCAAAAGTTACAAGAAAGTTGAGTTAAAGATTA  
ACAGTTAAAGATTAAGGCTGAATAATACTGGGACAGGGGCCAAATATCGGTGGTCAAACACCTGGGCCCCGGCTCAGGGC  
CAAGAACAGATGGCTCTCAGACGTGAGTGTAGCAGAACTAGCTTCACTGATTTAAAAAATAGAGGTGCACAGTGCTCT  
GGCCACTCCTTAAACCTGTGTGTCTGCCAATGTTCTGACCAGGTGTGTGCCATTGTTGAACCTTCATTAGACCTTTTCC  
TCGTACCCCTCCCATACCCATTTCTTGAAATAGACATTGTTTAGAACTAAAAAGTCCCACCTCAGTTTCCCCAAATGAC

CGAGAAATACCCCAAGCCTTATTTCGAACTAACCAACCAGCTCGCTTCTCGCTTCTGTAACCGCGCTTTTTTGCTCCCCAGC  
CCCAGCCCTATAAAAAGGGTAAAACTCCACACTCGGCGCGCCAGTCCTCCGATAGACTGCGTCGCCCCGGGTACCCGTGT  
TCTCAATAAAGCCTCTTGCTGTTTGCATCCGAATCGTGGTCTCGCTGGTCCTTGAGAGGGTCTCCTCAGATTGATTGACT  
ACCCACGTGGGGGTCTTTCA

>Pmv8

TGAAAGACCCCACCATCAGGCTTAGCAAGCTAGCTGCAGTAACGCCATTTTGCAAGGCATGAAAAAGTACCAGAGCTGAG  
TTCTCAAAAGTTACAAGAAAGTTCAAGTTAAAGATTAAGGCTGAATAATACTGGGACAGGGGCCAAATATCGGTGGTCAAG  
CACCTGGGCCCCGGCTCAGGGCCAAGAACAGATGGCTCTCAGACGTCAGTGTTAGCAGAACTAGCTTCACTGATTTAGAA  
AAATAGAGGTGCACAGTGTCTGGCCACTCCTTGAACCTGTGTGTCTGCCAATGTTCTGACCAGGTGTGTGCCATTGTT  
GAACCTTCATTAGACCTTTTCTCGTACCCCTCCACACCCATTTCTTGAAAATAGACATTGTTTAGAACTAAAAAGTCC  
CACCTCAGTTTTCCCAAATGACCGAGAAATACCCCAAGCCTTATTTCGAACTAACCAACCAGCTCGCTTCTCGCTTCTGTA  
ACCGCGCTTTTTTGCTCCCCAGCCCCAGCCCTATAAAAAGGGTAAAACTCCACACTCGGCGCGCCAGTCCTCCGATAGAC  
TGCGTCGCCCCGGGTACCCGTGTTCTCAATAAAGCCTCTTGCTGTTTGCATCCGAATCGTGGTCTCGCTGGTCCTTGAGAG  
GGTCTCCTCAGATTGATTGACTACCCACGTGGGGGTCTTTCAATTTGGAGGTTCCACCGAGATTTGGAGACCCCTGCCCA  
GGGACCACCGACCCCCCGCCGGGAGGTAAGCTGGCCAGCGGTGCTTTCTGTGTCTGTCTCTGTCTTCTGTGCTGTTTGTGC  
CGGCATCCAATGTTTGGCCTGCGTCTGTACTAGTTAGCTAACTAGATCTGTATCTGGCGGTTCCGCGGAAGAACTGACG  
AGTTCGTATTCCCGGCCGCGAGCCCTGGGAGACGTCCAGCGGCCCTCGGGGGCCCGTTTTGTGGCCCATTTCTGTATCAGT  
TAACCTACCCGAGTCGGAATTTTTGGAGCTCCGCCACTGTACGTGGCTTTGTTGGGGGACGAGAGACAGAGACACTTCCC  
GCCCCGTCTGAATTTTTGCTTTTCGGTTTTACGCCGAAGCCGCGCCGCGCTCTGATTTGTTTGTGTTCTTTTGTTCCTT  
CGTTAGTTTTCTTCTGTCTTTAAGTGTTCGAGATCATGGGACAGACCGTAACCTACCCCTCTGAGTTTAACTTGCAGC  
ACTGGGGAGATGTCCAGCGCATTGCATCCAACAGTCTGTGGATGTCAAGAAGAGGCGCTGGATTACCTTCTGTTCCGCT  
GAATGGCCAACTTTCAATGTGGGATGGCCTCAGGATGGTACTTTCAATTTAAGTATTATCTCTCAGGTTAAGTCTAGAGT  
GTTTTGTCTGGTCCCCACGGACACCCGGATCAGGTCCCATATATCGTCACCTGGGAGGCATTGCCTATGACCCCCCTC  
CGTGGGTCAAACCGTTTTGTGTCTCCTAAACTTCCTCCCTTGCCGACAGCTCCCGTCTCTCCCGCCCGGTCTTCTGCGCAA  
CCTCCGTCCCGATCTGCCCTTTACCCTGCCCTTACCCCTCTATAAAGTCCAAACCTCCTAAGCCCCAGGTTCTCCCTGA  
TAGCGGGGACCCCTCATTGACCTTCTCACAGAGGACCCCCGCGGTACAGAGCACAAACCTCCTCCTCTGCCAGGGAGA  
ACGACGAAGAAGAGGCGGCCACCACTCCGAGGTTTTCCCCCTTCTCCCATGGTGTCTCGACTGCGGGGAAAGAGAGAC  
CCTCCCGCAGCTGAGACTCCACCACCTCCAGGCAATTTCCACTCCGCATGGGGGGAGATGGCCAGCTTCAGTATTGGCGGTT  
TTCCTCTTCGATTTTATACAATTGGAATAATAAACCTTCTCTTTCTGAAGATCCAGGTAAATTGACGGCCTTGATTG  
AGTCCGTCTCATCACCCACCAGCCACCTGGGACGACTGTGAGCAGTTGTTGGGGACCCTGCTGACCGGAGAAGAAAAG  
CAGCGGGTGCTCCTAGAGGCTAGAAAGGCAGTCCGGGGCAATGATGGACGCCCCACTCAGTTGCCTAATGAAGTCAATGC  
TGCTTTTTCCCTTGAACGCCCCGGTTGGGATTACACCACTACAGAAGGTAGGAACCACCTAGTCCTCTATCGCCAGTTGC  
TCTTAGCGGGTCTCCAGAACGCGGGCAGAAGTCCCACCAATTTGGCCAAGGTAAAAGGGATAACCCAGGGACCTAATGAG  
TCTCCCTCAGCCTTTTTAGAGAGACTCAAAGAGGCCTATCGCAGGTACACTCCTTATGACCCTGAGGACCCAGGGCAAGA  
AACCAATGTGTCTATGTCAATTCATCTGGCAGTCTGCCCGGATATCGGGCGAAAGTTAGAGCGGTTAGAAGATTTAAAGA  
GCAAGACCTTAGGAGACTTAGTGAGGGAAGCTGAAAAGATCTTTAATAAGCGAGAAACCCCGGAAGAAAGAGAGGAACGT  
ATCAAGAGAGAAACAGAGGAAAAGAAGAACGCCGTAGGGCAGAGGATGAGCAGAGAGAGAAAGAAAGGGACCGCAGAAG  
ACATAGAGAGATGAGCAAGCTCTTGCCACTGTAGTTATTGGTCAGAGACAGGATAGACAGGGGGGAGAGCGGAGGAGGC  
CCCAACTTGATAAGGACCAATGCGCCTACTGCAAAGAAAAGGGACACTGGGCTAAGGACTGCCCAAAGAACCCAGAGGG  
CCCCGAGGACTGAGGCCCCAGACCTCCCTCCTAACCTTAGGTGACTAGGGAGGTGAGGGTCAGGAGCCCCCCCCCTGAACC  
CAGGATAACCCCTCAAAGTCGGGGGGCAACCCGTACCTTCTTGGTAGATACTGGGGCCCAACACTCCGTGCTGACCCAAA  
ATCCTGGACCCCTAAGTGACAAGGCTGCCTGGGTCCAAGGGGCTACTGGAGGAAAGCGGTATCGCTGGACCACGGATCGC  
AAAGTACATCTAGCTACCGGTAAGGTCACCCACTCTTCTCCTCATGTACCAGACTGCCCCCTATCCTCTGCTAGGAAGAGA  
CTTGCTGACTAACTAAAAGCCCCAAATCCACTTCGAGGGATCAGGAGCTCAGGTTATGGGACCAATGGGACTGCCCCCTGC  
AAGTGTGACCTAAACATAGAAGATGAGTATCGGTACATGAGACCTCAAAGAGCCGGATGTTTCTCTAGGGTCCACC  
TGGCTTTCTGATTTTTCCCAGGTCTGGGCGGAAACCGGGGCGATGGGACTGGCAGTTGCGCAAGCTCCTCTGATCATACC  
TCTGAAGGCAACCTCTACCCCGTGTCCATAAAACAATACCCCATGTACAAGAAGCCAGACTGGGGATCAAGCCCCACA  
TACAGAGACTGTTGGACCAGGGAATACTGGTACCCTGCCAGTCCCCCTGGAACACGCCCCCTGCTACCCGTTAAGAAACCA  
GGGACTAATGATTATAGGCCTGTCCAGGATCTGAGAGAAGTCAACAAGCGGGTGGAAGACATCCACCCACCCGTGCCCAA  
CCCTTACAACCTCTTGAGCGGGCTCCCACCGTCCCACCACTGGTACACTGTGCTTGATTTAAAGGATGCCTTTTTCTGCC  
TGAGACTCCACCCACCAGCCAGCCTCTCTTCGCCTTTGAGTGGAGAGATCCAGAGATGGGAATCTCAGGACAATTGACC  
TGGACCAGACTCCACAGGGTTTTCAAAAACAGTCCCACCTGTTTTGATGAGGCACTGCACAGAGACCTAGCAGACTTCCG  
GATCCAGCACCCAGACTTGATCCTGCTACAGTACGTGGATGACTTACTGCTGGCCGCCACTTCTGAGCTCGACTGCCAAC  
AAGGTACTCGGGCCCTGTTACAAACCTAGGGAACCTCGGTATCGGGCCTCGGCAAGAAAGCCCAAATTTGCCAGAAA  
CAGGTCAAGTATCTGGGGTATCTTCTAAAAGAGGGTCAGAGATGGCTGACTGAGGCCAGAAAAGAGACTGTGATGGGGCA  
GCCTACTCCGAAGACCCCTCGACAATAAGGGAGTTCTAGGGACGGCAGGCTTCTGTGCGCTCTGGATCCCTGGGTTTG  
CAGAAATGGCAGCCCCCTTGTAACCTCTCACAAAACGGGGACTCTGTTTAATTGGGGCCCAGACCAGCAAAAGGCCTAT

CAAGAAATCAAACAGGCTCTTCTAACTGCCCCAGCCCTGGGATTGCCAGATTTGACTAAGCCCTTTGAACTCTTTGTTGA  
CGAGAAGCAGGGCTACGCCAAAGGCGTCCTAACGCAAAAAGTGGGACCTTGGCGTCGGCCGGTGGCCTACCTGTCCAAAA  
AGCTAGACCCAGTGGCAGCTGGGTGGCCCCCTTGCCTACGGATGGTAGCAGCCATTGCCGTTCTGACAAAAGATGCAGGC  
AAGCTAACCATGGGACAGCCGCTAGTCATCTGGCCCCCATGCAGTAGAGGCACTAGTCAAGCAACCCCTGACCGCTG  
GCTATCCAACGCCCCGATGACCCACTATCAGGCGATGCTCCTAGATACGGACCGGGTCCAGTTCGGACCGGTGGTAGCCC  
TAAACCCGGCTACGTTGCTCCCCCTACCGGGGAAAGAGCCTCACCATGACTGCCTCGAGATCTTGGCCGAGACACACGGA  
ACCAGACCAGACCTCACGGACCAGCCCCCTCCAGACGCCGACCACACCTGGTATACAGATGGAAGCAGCTTCCTGCAAGA  
GGGACAACGTAGGGCTGGAGCAGCGGTGACCACCGAGACCGAGGTAATCTGGGCCTGCCTTCGTCTCCCAGGTAAGTCAG  
TCGGTGGCCAAGCTACTGGGGATTGATTGAAAACCTACATTGTGCTTACAGACCCAGAGTTCAGGTCAAGGTAGAAAGAAT  
GAATAGGACAATCAAGGAGACTTTTGACCAAACTAACGCTTGCAACTGGCACTAGAGACTGGGTACTCCTACTTCCCTTAG  
CCCTCTACCGAGCCCCGAACTCCGGGCCCCCATGGACTCACTCCGTATGAAATCCTGTATGGGGCGCCCCCGCCCCCTT  
GTTAATTTCCATGATCCTGAAATGTCAAAGTTTACTAATAGCCCCTCTCTCCAAGCTCACTTACAGGCCCTCCAAGCAGT  
ACAACGAGAGGTCTGGAAGCCACTGGCCGCTGCCTATCAGGACCAGCTGGACCAGCCAGTGATACCACACCCCTTCCGTG  
TCGGCGACACCGTGTGGGTACGCCGGCACCAGACTAAAACTTGAACCTCGCTGGAAGGACCCTACACCGTCTGTCTG  
ACCACCCCAACCGCTCTCAAAGTAGACGGCATCGCTGCGTGGATCCACGCCGCTCACGTAAAAGCGGCGACAACCCCTCC  
GGCCGGAACAGCATCAGGACCAGCATGAAAGGTCCAGCGTTCTCAAACCCCTTAAAGATAAGATTAACCCGTGGGGCCC  
CCTAATAATCCTGGGGATCTTAATAAGAGCAGGAGTATCAGTACAACATGACAGCCCTCATCAGGTCTTCAATGTTACTT  
AGAGAGTTACCAACTTAATGACAGGACAAACAGCTAATGCTACCTCCCTCCTGGGGACAATGACCGATGCCTTTCTTAA  
CTGTACTTTGACTTGTGCGATTTAATAGGGGACGACTGGGATGAGACTGGACTCGGGTGTGCGACTCCCGGGGGAAGAAA  
AAGGGCAAGAACATTTGACTTCTATGTTTGGCCCGGCATACTGTACCAACAGGGTGTGGAGGGCCGAGAGAGGGGCTACT  
GTGGCAAATGGGGCTGTGAGACCACTGGACAGGCATACTGGAAGCCATCATCATCATGGGACCTAATTTCCCTTAAGCGA  
GGAAACACCCCTCGGAATCAGGGCCCCCTGTTATGATTCTCAGCGGTCTCCAGTGACATCAAGGGCGCCACACCGGGGG  
TCGGTGAATCCCCTAGTCCTGGAATTCAGTGACGCGGGCAAAAAGGCCAGCTGGGATGGCCCCAAAGTATGGGGACTAA  
GACTGTACCGATCCACAGGGACCGACCCGGTGACCCGGTTCTCTTTGACCCGCCAGGTCTCAATATAGGGCCCCCGCTC  
CCCATTGGGCCTAATCCCGTGATCACTGACCAGTTACCCCCCTCCCGACCCGTGCAGATCATGCTCCCCAGGCCTCCTCA  
GCCTCCTCCTCCAGGCGCAGCCTCTATAGTCCCTGAGACTGCCCCACCTTCTCAACAACCTGGGACGGGAGACAGGCTGC  
TAAACCTGGTAGGAGCCTACCAAGCTCTCAACCTCACCAGTCTTGACAAAACCAAGAGTCTGGTTGTGTCTGGTA  
GCGGAGCCCCCTACTACGAAGGGGTTGCCGTCTAGGTACTTATTCACCAACCATACCTCTGCCACCATACCTGCTCCGT  
GGCCTCCCAACACAAGCTGACCCTGTCCAAGTGACCGGACAGGGACTCTGCGTAGGAGCAGTTCCCAAAACCCATCAGG  
CCCTGTGTAATACCACCCAGAAGACGAGCGACGGGTCTACTATCTGGCTGCTCCCGCCGGGACCATTTGGGCTTGCAAC  
ACCGGGCTCACTCCCTGCCTATCTACCCTGTACTCGACCTCACCACCGATTACTGTGTCTCTGGTTGAGCTCTGGCCAAA  
GGTGACCTACCCTCCCTGGTTATGTTTATGGCCAGTTTGAGAGAAAAACCAATATAAAAAGAGAGCCGGTGTCAATTA  
CTCTGGCCCTGCTGTTGGGAGGACTTACTATGGGCGGCATAGCTGCAGGAGTAGGAACCGGGACTACAGCCCTAGTGGCC  
ACCAAACAATTCGAGCAGCTCCAGGCAGCCATACATACAGACCTTGGGGCTTTAGAAAAGTCAGTCAGTGCCCTAGAAAA  
GTCTCTGACCTCGTTGTCTGAGGTGGTCTACAGAACCGAGGGGATTAGATCTACTGTTCTTAAAGAAGGAGGATTAT  
GTGCTGCCCTAAAAGAAGAATGCTGTTTCTACGCGGACCACACTGGCGTAGTAAGAGATAGCATGGCAAAGCTAAGAGAA  
AGGTTGAACCAGAGACAAAAATTGTTTGAATCAGGACAAGGGTGGTTTGGGGACTGTTTAAACAGGTCCCATGGTTTAC  
GACCTTAATATCCACCATTATGGGCCCCCTTGATAATACTTTTATTAAACCTACTCTTCGACCCCTGTATTCTCAACCGCT  
TGGTCCAGTTTGTAAAAGACAGAATTTCCGGTAGTGACGGCCCTGGTTTTGACCCAACAGTATACCAACTCAAATCAATA  
GATCCAGAAGAAGTGAATCACGTGAATAAAAGATTTTATTAGTTTTCCAGAAAAGAGGGGGGAATGAAAGACCCCAACAT  
CAGGCTTAGCAAGCTAGCTGCAGTAACGCCATTTTGCAAGGCATGAAAAAGTACCAGAGCTGAGTTCTCAAAAGTTACAA  
GAAAGTTCAGTTAAAGATTAAGGCTGAATAATACTGGGACAGGGGCCAAATATCGGTGGTCAAGCACCTGGGCCCCGGCT  
CAGGGCCAAGAACAGATGGCTCTCAGACGTCAGTGTTAGCAGAACTAGCTTCACTGATTTAGAAAAATAGAGGTGCACAG  
TGCTCTGGCCACTCCTTGAACCTGTGTGTCTGCCAATGTTCTGACCAGGTGTGTGCCATTGTTGAACCTTCATTAGACC  
CTTTCTCGTACCCCTCCACACCCATTTCTTGAATAAGACATTGTTTAGAACTAAAAAGTCCCACCTCAGTTTCCCCA  
AATGACCCGAGAAATACCCCAAGCCTTATTGAACTAACCAACCAGCTCGCTTCTCGCTTCTGTAACCGCGCTTTTGTCTC  
CCAGCCCCAGCCCTATAAAAAGGGTAAAAACTCCACACTCGGCGCGCCAGTCTCCGATAGACTGCGTCGCCCCGGGTAC  
CCGTGTTCTCAATAAAGCCTCTTGCTGTTTGCATCCGAATCGTGGTCTCGCTGGTCTTGAGAGGGTCTCCTCAGATTGA  
TTGACTACCCACGTCGGGGGTCTTTCA

>Pmv9

TGAAAGACCCCAACCATCAGGCTTAGCAAGCTAGCTGCAGTAACGCCATTTTGCAAGGCATGAAAAAGTACCAGAGCTGAG  
TTCTCAAAAGTTACAAGAAAGTTCAAGTTAAAGATTAACAGTTAAAGATTAAGGCTGAATAATACTGGGACAGGGGGCCAAA  
TATCGGTGGTCAAGCACCTGGGCCCCGGCTCAGGGCCAAGAACAGATGGCTCTCAGACGTCAGTGTTAGCAGAACTAGCT  
TCACTGATTTAGAAAAATAGAGGTGCACAGTGCTCTGGCCACTCCTTGAACCTGTGTGTCTGCCAATGTTCTGACCAGGT  
GTGTGCCATTGTTGAACCTTCATTAGACCCTTTCTCGTACCCCTCCCATACCCATTTCTTGAATAAGACATTGTTTGA  
GAACTAAAAAGTCCCACCTCAGTTTCCCCAAATGACCGAGAAATACCCCAAGCCTTATTCAAATAACCAACCAGCTCGC  
TTCTCGCTTCTGTAACCGCGCTTTTTGCTCCCCAGCCCCAGCCCTATAAAAAGGGTAAAAACTCCACACTCGGCGCGCCA

GTCCTCCGATAGACTGCGTCGCCCCGGGTACCCGTGTTCCCAATAAAGCCTCTTGCTGTTTTGCATCCGAATCGTGGTCTCG  
CTGGTCTCTTGAGAGGGTCTCCTCAGATTGATTGACTACCCACGTGCGGGGTCTTTCATTTGGAGGTCCCACCGAGATTTG  
GAGACCCCTGCCAGGGACCACCGACCCCCCGCGGGAGGTAAGCTGGCCAGCGGTCTGTTTCGTGTCTGTCTCTGTCTCC  
GTGCGTGTGTTGTGCCGGCCTCTAATGTTTGGCCTGCGTCTGTACTAGTTGGCTAACTAGATCTGTATCTGGCGGTTCCG  
CGGAAGAACTGACGAGTTCGTATTCCCGGCCGACGCCCTGGGAGACGTCCAGCGGCCTCGGGGGCCCCGTTTTGTGGCC  
CATTCTGTATCAGTTAACCTACCCGAGTCGGACTTTTTGGAGCTCCGCCACTGTACGTGGCTTTGTTGGGGGACGAGAGA  
CAGAGACACTTCCCGCCCCCGTCTAAATTTTTGCTTTTCGGTTTTACGCCGAAGCCGCGCCGCGCTGTGATTTGTTTGT  
GTTCTTTTGTCTTTCGTTAGTTTTCTTCTGTCTTTAAGTGTTTTCGAGATCATGGGACAGACCGTAACCTACCCCTCTGAG  
TTTAACCTTGACGACTGGGGAGATGTCCAGCGCATTGCATCCAACAGTCTGTGGATGTGAGGAAGAGGCGCTGGATTA  
CCTTCTGTTCCGCTGAATGGCCAACTTTCAATGTGGGATGGCCTCAGGATGGTACTTTCAATTTAAGTATTATCTCTCAG  
GTTAAGTCTAGAGTGTTTTGTCTGGTCCCCACGGACACCCGGATCAGGTCCCATATATCGTCACCTGGGAGGCACTTGC  
CTATGACCCCCCTCCGTGGGTCAAACCGTTTTGTGTCTCTAAACTTCCTCCCTTGCCGACAGCTCCCGTCTCCCGCCCG  
GTCCTTCTGCGCAACCTCCGTCCCGATCTGCCCTTTACCCTGCCCTTACCCCTCTATAAAGTCCAAACCTCCTAAGCCC  
CAGGTTCTCCCTGATAGCGGCGGACCCCTCATTGACCTTCTCACAGAGGACCCCCCGCCGTACAGAGCACAACCTCCTC  
CTCTGCCAGGGAGAACGACGAAGAAGAGGCGGCCACCACCTCCGAGGTTTCCCCCTTCTCCCATGGTGTCTCGACTGC  
GGGGAAGGAGAGACCTTCCCGCAGTGGACTCCACCACCTCCAGGCATTTCCACTCCGCATGGGGGAGATGGCCAGCTT  
CAGTATTGGCCGTTTTCTCTTTCGGATTTATACAATTGGAATAATAACCTTCTCTTTCTGAAGATCCAGGTAAATT  
GACGGCCTTGATTGAGTCCGTCTCATCCCCACCAGCCACCTGGGACGACTGTCAGCAGTTGTTGGGGACCCCTGCTGA  
CCGGAGAAGAAAAGCAGCGGGTGCTCCTAGAGGCTAGAAAGGCAGTCCGGGGCAATGATGGACGCCCCACTCAGTTGCCT  
AATGAAGTCAATGCTGCTTTTTCCCTTAAACGCCCCGTTGGGATTACACCACTACAGAAGGTAGGAACCACTAGTCCT  
CTATCGCCAGTTGCTCTTAGCGGGTCTCCAGAACGCGGGCAAAAGTCCCACCAATTTGGCCAAGGTAAAAGGGATAACCC  
AGGGACCTAATGAGTCTCCCTCAGCCTTTTTAGAGAGACTCAAAGAGGCCTATCGCAGGTACACTCCTTATGACCCTGAG  
GACCCAGGGCAAGAAACCAATGTGTCTATGTCAATTCATCTGGCAGTCTGCCCCGGATATCGGGCGAAAGTTAGAGCGGTT  
AGAAGATTTAAAGAGCAAGACCTTAGGAGACTTAGTGAGGGAAGCTGAAAAGATCTTTAATAAGCGAGAAACCCCGGAAG  
AAAGAGAGGAACGTATCAAGAGAGAAACAGAGGAAAAAGAAGAACGCCGTAGGGCAGAGGATGAGCAGAGAGAGAAAGAA  
AGGGACCGCAGAAAGACATAGAGAGATGAGCAAGCTCTTGGCCACTGTAGTTATTGGTCAGAGACAGGATAGACAGGGGG  
AGAGCGGAGGAGGCCCCAATTGATAAGGACCAATGCGCCTACTGCAAAGAAAAGGGACACTGGGCTAAGGACTGCCAA  
AGAAGCCAGGAGGGCCCCGAGGACTGAGGCCCCAGACCTCCCTCCTAACCTTAGGTGACTAGGGAGGTAGGGTCCAGGAG  
CCCCCCCCCTGAACCCAGGATAAACCTCAAAGTCGGGGGGCAACCCGTACCTTCTGGTAGATACTGGGGCCCCAACACTC  
CGTGCTGACCCAAAATCCTGGACCCCTAAGTGACAAGTCTGCTGGGTCCAAGGGGCTACTGGAGGAAAGCGGTATCGCT  
GGACCACGGATCGCAAAGTGCATCTAGCTACCGGTAAGGTACCCACTCTTTCTCCATGTACCAGACTGCCCTATCCT  
CTGCTAGGAAGAGATTTGCTGACTAACTAAAAGCCCCAAATCCACTTTGAGGGATCAGGAGCTCAGGTTGTGGGACCAAT  
GGGACAGCCCCCTGCAAGTGCTGACCCTAAACATAGAAGATGAGTATCGGCTACATGAGACCTCAAAGAGCCGGATGTTT  
CTCTAGGGTCCACATGGCTTTCTGATTTTTCCCAGGCCTGGGCGGAAACCGGGGCGATGGGACTGGCAGTTCCGCAAGCT  
CCTCTGATCATACCTCTGAAGGCAACCTCTACCCCCGTGTCCATAAAACAATACCCCATGTCAAGAAGCCAGACTGGG  
GATCAAGCCCCACATACAGAGACTGTTGGACCAGGGAATACTGGTACCCTGCCAGTCCCCCTGGAACACGCCCCCTGCTAC  
CCGTTAAGAAACCAGGACTAATGATTATAGGCCTGTCCAGGATCTGAGAGAAGTCAACAAGCGGGTGGAAGACATCCAC  
CCCACCGTGCCCAACCTTACAACCTCTTGAGCGGGCTCCCACCGTCCCACCAGTGGTACACTGTGCTTGACTTAAAGGA  
TGCCTTTTTCTGCCTGAGACTCCACCCACCAGTCAGCCTCTCTTCGCCTTTGAGTGGAGAGACCCAGAGATGGGAATCT  
CAGGACAATTAACCTGGACCAGACTCCCACAGGGTTTTCAAAAACAGTCCCACCCTGTTTGATGAGGCACTGCACAGAGAC  
CTAGCAGGCTTCCGGATCCAGCACCCAGACTTGATCCTGCTACAGTACGTGGATGACTTACTGTCTGGCCGCCACTTCTGA  
GCTCGACTGCCAACAAGTACTCGGGCCCTGTTACAAACCTAGGGGACCTCGGGTATCGGGCCTCGGCCAAGAAGGCC  
AAATTTGCCAGAAACAGGTCAAGTATCTGGGGTATCTTCTAAAAGAGGGTCAGAGATGGCTGACTGAGGCCAGAAAAGAG  
ACTGTGATGGGGCAGCCTACTCCGAAGACCCCTCGACAATAAGGGAGTTTCTAGGGACGGCAGGCTTCTGTGCTCTG  
GATCCCTGGGTTTGCAGAAATGGCAGCCCCCTTGTACCCTCTCACCAAAACGGGGACTCTGTTTAATTGGGGCCCAGACC  
AGCAAAAGGCCATCAAGAAATCAAACAGGCTCTTCTAACTGCCCCAGCCCTGGGATTGCCAGATTTGACTAAGCCCTTT  
GAACTCTTTGTGACGAGAGAAGCAGGGCTACGCCAAAGGCGTCTAACGCAAAAACCTGGGACCTTGGCGTCGGCCGGTG  
CTACCTGTCCAAAAGCTAGACCCAGTGGCAGCTGGGTGGCCCCCTTGCTACGGATGGTAGCAGCCATTGCCGTTCTGA  
CAAAAGATGCAGGCAAGCTAACCATGGGACAGCCGCTAGTCATCCTGGCCCCCATGCAGTAGAGGCACTAGTCAAGCAA  
CCCCCGGATCGCTGGCTATCCAACGCCCCGATGACCCACTATCAGGCGATGCTCCTAGATACGGACCGGGTCCAGTTCCG  
ACCGGTGGTAGCCCTAAACCCGGCTACGTTGCTCCCCCTACCGGGGAAAGAGCCTCACCATGACTGCCTCGAGATCTTGG  
CCGAGACACACGGAACCAGACCAGACCTCACGGACCAGCCCCCTCCAGACGCCGACCACACCTGGTATACAGATGGAAGC  
AGCTTCTGCAAGAGGGACAACGTAGGGCTGGAGCAGCGGTGACCACCGAGACCGAGGTAATCTGGGCCAAGGCATTGCC  
AGCCGGGACATCCGCCAGCGAGCTGAACTAATAGCACTACCCAGGCCCTAAAGATGGCAGAAGGTAAGAAGCTAAATG  
TTTATACTGATAGCCGCTATGCCTTTGCTACCGCCCATGTCCATGAAAAATATATAGGAGACGTGGGTTGCTCACCTCA  
GAAGGCAAGGAGATCAAGAACAAGGGCGAAATCTTGGCCTTACTGAAAGCTCTCTTTCTGCCAAAAGACTCAGTATAAT  
TCACTGCCCAGGACATCAGAAAGGCAATAGTGCTGAAGCTAAAGGCAACCGAATGGCGGACCAGGCAGCCCGGGAAGCAG

CCATGGGGACTGACACAAAGGCCTCCTCACTTCTCATAGAGACCTCAACCCCGTACACTCCAGACTTCTTCCATTATACT  
GAGACAGATATAAAGAACCTACAAGAGTTGGGAGCCACATATGATAGAGAGAAAAAATATTGGGTCTGCAAGGTAAACC  
TGTGATGCCTGACCAGTTCACCTTTGAATTATTAGACTTCCTTACCAGCTCACCCACCTTAGCTATCAGAAGATGAGGG  
CACTTCTAGACAGGAAAGAAAGCCCCCTATTACATGCTAAATAAAGATAAGATCCTCCACGAGGTGGCGGAATCATGCCAA  
GCCTGTGTCCAAGTAAATGCCAGTAAGACTAAGATCAGGGCCGGAACACGAGTAAGAGGACATCGACCAGGCACCCATTG  
GGAAATTGACTTTACTGAAGTGAAGCCCGGACTGTATGGGTACAAGTATCTCCTGGTATTTCGTGGACACGTTCTCTGGCT  
GGGTGAAGCCTTCCCAACCAAACATGAGACTGCCAAAATAGTGACCAAGAACTTCTGGAAAAAATATTTCCAAGGTTT  
GGAATGCCCCAAGTGTGGGGACTGATAATGGGCCTGCCTTCGTCTCCAGGTAAGTCAGTCGGTGGCCAAGCTACTGGG  
GATTGATTGAAACTACATTGTGCTTACAGACCCAGAGTTCAGGTCAGGTAGAAAGAATGAATAGGACAATCAAGGAGA  
CTTTGACCAAAATTAACGCTTGCACACTGGCACTAGAGACTGGGTACTCCTACTTCCCTTAGCCCTCTACCGAGCCCGCAAC  
ACTCCGGGCCCCCATGGACTCACTCCGTATGAAATCCTGTATGGGGCGCCCCGCCCCCTTGTTAATTTCCATGATCCTGA  
AATGTCAAAGTTTTACTAATAGCCCCTCTCTCCAAGCTCACTTACAGGCCCTCCAAGCAGTACAACGAGAGGTCTGGAAGC  
CACTGGCCGCTGCCTATCAGGACCAGCTGGACCAGCCAGTGATACCACACCCCTTCCGTGTGCGCGACACCGTGTGGGT  
CGCCGGCACCAGACTAAGAACTTGGAACCTCGCTGGAAAGGACCCTACACCGTCTGTGACCACCCCCACCGCTCTCAA  
AGTAGACGGCATCGCTGCGTGGATCCACGCCGCTCACGTAAAAGCGGCGACAACCCCTCCGGCCGGAACAGCATCAGGAC  
CGACATGAAAGGTCCAGCGTTCTCAAAACCCCTTAAAGATAAGATTAACCCGTGGGGCCCCCTAATAGTCTGGGGATCT  
TAATAAGGGCAGGAGTATCAGTACAACATGACAGCCCTCATCAGGTCTTCAATGTTACTTGGAGAGTTACCAACTTAATG  
ACAGGACAAACAGCTAATGCTACCTCCCTCCTGGGGACAATGACCGATGCCTTTCTTAACTGTACTTTGACTTGTGCGA  
TTTAATAGGGGACGACTGGGATGAGACTGGACTCGGGTGTGCGACTCCCGGGGGAAGAAAAGGGCAAGAACATTTGACT  
TCTATGTTTTGCCCCGGGCATACTGTACCAACAGGGTGTGGAGGGCCGAGAGAGGGCTACTGTGGCAAATGGGGCTGTGAG  
ACCACTGGACAGGCATACTGGAAGCCATCATCATGAGGACCTAATTTCCCTTAAGCGAGGAAACACCCCTCGGAATCA  
GGGCCCCCTGTTATGATTCTCAGCGGTCTCCAGTGACATCAAGGGCGCCACACCGGGGGGTGATGCAATCCCCTAGTCC  
TGGAATTCACTGACGCGGGCAAAAAGGCCAGCTGGGATGGCCCCAAAGTATGGGGACTAAGACTGTACCGATCCACAGGG  
ACCGACCCGGTGACCCGGTTCTCTTTGACCCGCCAGGTCTCAATATAGGGCCCCGCGTCCCCATTGGGCCTAATCCCGT  
GATCACTGACCAGTTACCCCCCTCCCGACCCGTGCAGATCATGCTCCCCAGGCCTCCTCAGCCTCCTCCTCCAGGCGCAG  
CCTCTATAGTCCCTGAGACTGCCCCACCTTCTCAACAACCTGGGACGGGAGACAGGCTGCTAAACCTGGTAGATGGAGCC  
TACCAAGCTCTCAACCTCACCAGTCTTGACAAAACCCAAGAGTCTGGTTGTGTCTGGTAGCGGGACCCCCCTACTACGA  
AGGGTTGCGCTCCTAGGTACTTATTCCAACATACTCTGCCAGCTAAGTCTCGTGGCCTCCCCACACAAGTCTGTA  
CCCTGTCCGAAGTACCGGACAGGGACTCTGCGTAGGAGCAGTTCCCAAAACCCATCAGGCCCTGTGTAATACCACCCAG  
AAGACGAGCGACGGGTCTACTATCTGGCTGCTCCCGCCGGGACCATTTGGGCTTGCAACACCGGGGTCACTCCCTGCCT  
ATCTACCACTGTACTCGACCTCACCACCGATTACTGTGTCTCTGGTTGAGCTCTGGCCAAAGGTGACCTACCACTCCCCTG  
GTTATGTTTATGGCCAGTTTGAGAGAAAAACCAATATAAAAGAGAGCCGGTGTCAATTAACCTCTGGCCCTGCTGTTGGGA  
GGACTTACTATGGGCGGCATAGCTGCAGGAGTAGAAACCGGGACTACAGCCCTAGTGGCCACCAACAATTCGAGCAGCT  
CCAGGCAGCCATACATACAGACCTTGGGGCTTTAGAAAAGTCAGTCAGTGCCCTAGAAAAGTCTCTGACCTCGTTGTCTG  
AGGTGGTCTTACAGAACCGGAGGGGATTAGATCTACTGTTCTTAAAGAAGGAGGATTATGTGCTGCCCTAAAAGAAAA  
TGCTGTTTTCTACGCGGACCACACTGGCGTAGTAAGAGATAGCATGGCAAAGCTAAGAGAAAGGTTAAACCAGAGACAAAA  
ATTGTTTGAATCAGGACAAGGGTGGTTTGAGGGACTGTTTAACAGGTCCCCTATGGTTACGACCTTAATATCCACCATT  
TGGGCCCCCTTGATAATACTTTTATTAATCCTACTCTTCGACCCCTGTATTCTCAACCGCTTGGTCCAGTTTGTAAAAGAC  
AGAATTTGCGTAGTGACGGCCCTGGTTTTGACCCAACAGTATACCAACTCAAATCAATAGATCCAGAAGAAGTGAATC  
ACGTGAATAAAAGATTTTATTAGTTTCCAGAAAGAGGGGGGAATGAAAGACCCCAACCATCAGGCTTAGCAAGCTAGCTG  
CAGTAACGCCATTTTGCAAGGCATGAAAAAGTACCAGAGCTGAGTTCTCAAAAGTTACAAGAAAGTTAGTTAAAGATTA  
ACAGTTAAAGATTAAGGCTGAATAATACTGGGACAGGGGCCAAATATCGGTGGTCAAGCACCTGGGCCCCGGCTCAGGGC  
CAAGAACAGATGGCTCTCAGACGTCAGTGTTAGCAGAACTAGCTTCACTGATTTAGAAAAATAGAGGTGCACAGTGCTCT  
GGCCACTCCTTGAACCTGTGTGTCTGCCAATGTTCTGACCAGGTGTGTGCCATTGTTGAACCTTCATTAGACCCCTTCC  
TCGTACCCCTCCCATACCCATTTCTTGAATAATAGACATTGTTTAGAATAAAAAGTCCCACCTCAGTTTCCCCAAATGAC  
CGAGAAATACCCCAAGCCTTATTCAAATAACCAACCAGCTCGCTTCTCGCTTCTGTAACCGCGCTTTTTGCTCCCCAGC  
CCCAGCCCTATAAAAAGGGTAAAAACTCCACACTCGGCGCGCCAGTCTCCGATAGACTGCGTCGCCCCGGGTACCCGTGT  
TCCCAATAAAGCCTCTTGCTGTTTGCATCCGAATCGTGGTCTCGCTGGTCTTGAGAGGGTCTCCTCAGATTGATTGACT  
ACCCACGTCGGGGGTCTTTCA

>Xmv10

TGAAAGACCCCAACATAAGGCTTAGCAAGCTAGCTGCAGTAACGCCATTTTGCAAGGCATGAAAAAGTACCAGAGCTGAG  
TTCTCAAAAGTTACAAGGAAGTTAGTTAAAGATTAACAGTTACAAATCAAGGCTGAATAATACTAGGACAAGGGCCAAG  
AACCGATGGTACCCAGATAAAGCGGAACCAGCAACAGTTTCTGAAAAAGTCCCACCTCAGTTTTCAGGTTCCCCAAATGAC  
CAGGAAATACCCCAAGCCTTGATTTGAACTAACCCTCAGCTCGCTTCTCGCTTCTGTACCCGCGCTTTTTGCTCCCCAG  
CCCCAGCCCTATAAAAAGGGTAAGAATCCACACTCGGCGCGCCAGTCTCCGACAGACTGAGTCGCCCCGGGTACCCGTG  
TTCCCAATAAAGCCTCTTGCTGATTACATCCGAATCGTGGTCTCGCTGATCCTGGGAGGGTCTCCTCAGATTGATTGAC  
CACCCACCTCGGGGGTCTTTCA

GAGGTAAGCTGGCCAGCGGTCTGTTTCGTGTCTGTCTCTGTCTCCGTGCGTGTTCTGTGCCGGCATCTAATGTTTTGCGCCTG  
CGTCTGTACTAGTTGGCTAACTAGATCTGAATCTGGCGGTTCCGTGGAAGAACTGACGAGTTCATATTCCCGGCCGACG  
CCTGGGAGACGTCTCAGAGGCATCGGGGGCCATCTTTGTGGCCCAATCTGTATCTGAGAACCCGACCCGTCTCGGACTCT  
TTGGAGCCTCTCCTTTGACCGAGGGATACGTGGTTCTGTTGGGCGGCGAGGGGGCCGAAACGCTCCTCTCCCCCATCTGAA  
TTTTTGCTTTTCGGTTTTCCGCCGAAACCGCGCCGCGCGTCTTGTCTGTCTCTGTGTTGTTTTGTCAATTTGTTCGGTTTCGTT  
ATTGTTTTGGACCGTTTTCTAAAAATATGGGACAGACCGTAACCACTCCTTTGAGTCTGACCCTAGAACACTGGGGAGACG  
TCCAGCGCATTGCGTCCAACCACTCCGTGGACGTCAAGAAGAGACGTTGGGTACCTTCTGCTCTGCCGAGTGGCCAACT  
TTCGATGTGGGGTGGCCGCAAGATGGTACTTTTAATTTGGACATTATTTTACAGGTTAAATCTAAGGTGTTCTCTCCCG  
TCCCCACGGACACCCGGATCAGGTCCCATACATTGTACCTGGGAGGCACTTGCCTATGACCCCCCTCCGTGGGTCAAAC  
CGTTTGTCTCTCCAAAACCCCCCTCTTTACCGACAGCTCCCGTCTCCCGCCCGGTCTTCTGCGCAACCTCCGTCCCGA  
TCTGCCCTTTACCTTGCCCTTACCCCTCTATAAAGACCAAACCTCCTAAGCCCCAGGTTCTCCCTGATAACGGCGGACC  
GCTCATTGACCTTCTCACAGAGGACCCCCGCGGTACGGAGCACAACTTCTCCTCTGCCAGAGGGAACGATGAAGAAG  
AGGCGGCCGCCACCTCCGAGGTTTTCCCCCTTCTCCCATGGTGTCTCGACTGCGGGGAAGGAGGGACCTCCCGCAGCG  
GACTCCACCTCCTCCAGGCATTCCCACTCCGCATGGGGGGAGATGGCCAGCTTCAGTATTGGCCGTTTTCTCCTCGGA  
CTTATACAATTGGAATAATAACCTTCTTTTTCTGAAGACCCAGGTAAATTGACGGCCTTGATTGAGTCCGTCTCA  
TCACCCACCAGCCACCTGGGACGACTGTGACGAGTTGTTGGGGACCTGCTGACCGGAGAAGAAAAGCAGCGGGTGCTC  
CTAGAGGCTAGAAAGGCAGTCCGGGGCAATGATGGACGCCCCACTCAGTTGCCTAATGAAGTCAATGCTGCTTTTCCCT  
TGAACGCCCCGATTGGGATTACACCACTACAGAAGGTAGGAACCACTAGTCTCTATCGCCAGTTGCTCTTAGCGGGTC  
TCCAAAACGCGGGCAGAAGCCCCACCAATTTGGCCAAGGTAAAAGGGATAACCCAGGGACCTAATGAGTCTCCCTCAGCC  
TTTTTAGAGAGACTCAAGGAGGCCTATCGCAGGTACACTCCTTATGACCCTGAGGACCCAGGGCAAGAAACCAATGTGTC  
TATGTCAATTCATCTGGCAGTCTGCCCCGATATCGGGCGAAAGTTAGAGCGGTTAGAAGATTTAAAGAGCAAGACCTTAG  
GAGACTTAGTGAGGGAAGCTGAAAGGATCTTTAATAAGCGAGAAACCCCGGAAGAAAGAGAGGAACGTATCAGGAGAGAA  
ACAGAGGAAAAAGAAGAACGCCGTAGGGCAGAGGATGAGCAGAGAGAGAAAGAAAGGGACCGCAGAAGACATAGAGAGAT  
GAGCAAGCTCTTGGCCACTGTAGTTATTGGTCAGAGACAGGATAGACAGGGGGAGAGCGGAGGAGGCCCACTTGATA  
AGGACCAATGCGCCTACTGCAAAGAAAAGGGACACTGGGCTAAGGACTGCCCAAAGAAGCCACGAGGGCCCCGAGGACCG  
AGGCCCCAGACCTCCCTCCTGACCTTAGGTGACTAGGGAGGTGAGGTCAGGAGCCCCCCCCCTGAACCCAGGATAACCT  
CAAAGTCGGGGGCAACCCGTACCTTCTGTAGATACTGGGGCCCAACACTCCGTGCTGACCCAAAATCTTGGCCCTCC  
CATGTCAGTAGGGCACTGTTCAAGCAACCCCTGACCCTGGCTATCCAATGCCCGCATGACCCACTACAGGCAATGCT  
CCTAGACACTGACCGAGTTTCAGTTTCGACCACTGGTGGCCCTCAATCCTGCCACCTTGCTCCCTCTACCGAGAAAGGAG  
CCCCCATGATTGCCTCGAGATCTTGGCTGAAACGCATGGAACAGACCGGACCTCACCGACCAGCCCATCCAGACGCC  
GACCACACCTGGTATACCGATGGGAGCAGCTTTTTGCAAGAAGGACAGCGAAAGGCTGGGGCAGCAGTGACGACTGAGAC  
CGAGGTAATCTGGGCGAGGGCCCTGCCAGCTGGAACGTACAGCCAGCGAGCCGAACCTGATCGCACTCACCCAAGCCCTGA  
AAATGGCAGAAGGTAAGAAGCTAAATGTTTATACTGACAGCCGATATGCTTTTCGCCACGGCCCATGTCCATGGAGAAATC  
TATAGGAGGCGAGGGTTGCTGACCTCAGAGGGCAGAGAAATCAAAAACAAGAGCGAGATCCTGGCTTTACTGAAAGCTCT  
TTTCTGCTTAAAGACTCAGTATAATTCAGTCCCCGGGCATCAAAGGGAAACAGTGCTGAAGCCAGGGGCAACCGTA  
TGGCAGACCAAGCGGCCCCGAGAGGCAGCCATAAGGACATCTCCAGAACTTCCACCCTCCTCATAGAGGACTCGACCCCG  
TATACGCCCTCCCATTTCCACTACACTGAAACAGATCTAAAGAGATTACGAGAAGTGGGAGCCACCTATAATCAGATAAA  
AGGATATTGGGTCTTACAAGGCAAGCCGGTAATGCCCGATCAGTTTGTGTTGAACTATTAGACTCCTTACACAGGCTCA  
CTCACCTCAGCCCTCAAAAGATGAAGGCACCTCCTTGACAGAGAAGAAAGCCCTACTACATGTTAAACAGAGACAGAACT  
CTCCAGTATGTGGCAGAATCATGCACAGCTTGTGCTCAAGTGAATGCTAGTAAAGCCAAGATCGGGGCAGGGGTACGAGT  
ACGCGGACATCGACCAGGTACCCATTGGGAAATTGACTTTACTGAAGTTAAGCCAGGACTGTACGGGTACAAGTACCTCC  
TAGTGTTCGTGGACACCTTCTCTGGCTGGGTAGAAGCCTTCCCACTAAACGTGAAACCGCCAAGGTGGTAACCAAGAAG  
CTATTAGAAGAAATATTCCCAAGATTGGGATGCCACAGGTACTGGGTTCTGACAATGGGCCTGCCTTCGTCTCCAGGT  
AAGTCATTCCGTGGCCGATTTACTGGGGATTGATTGGAAGTTACATTGTGCTTATAGACCCAGAGTTTCCAGTCCAGGTAG  
AGAGAATGAATAGAACCATCAAGGAGACTTTAACCAAATTAACGCTGGCAGCTGGCACTAGAGACTGGGTACTCTACTC  
CCCCTGGCCCTCTACCGAGCCCGGAATACTCCGGGCCCCATGGACTTACTCCGTATGAAATCCTGTATGGGGCACCCCC  
GCCCCCTCGTCAATTTTCATGATCCTGAAATGTCAAAGTTAACTAATAGTCCCTCTCTCCAAGCTCACTTACAGGCCCTCC  
AAGCAGTACAACGAGAGGTCTGGAAGCCACTGGCCGCTGCTTATCAGGACCAGCTGGATCAGCCAGTGATACCACACCCC  
TTCCGTGTTCGGTGACGCCGTGTGGGTACGCCGGCACAGACTAAGAACCTTAGAACCCCGCTGGAAAGGACCTACACCGT  
CCTGCTGACCACCCCCACCGCTCTCAAAGTAGACGGCATCTCTGCGTGGATACACGCCGCTCACGTAAAGGCGGCGACAA  
CTCCTCCAGCCGGAACAGCATGAAAGGTCCAGCGTTCTCAAACCCCTTAAAGATAAGATTAAACCGTGGGGCCCCCTAA  
TAGTTATGGGGATCTTGGTGAGGGCAGGAGCCTCGGTACAACGTGACAGCCCTCACCAGATCTTCAATGTTACTTGGAGA  
GTTACCAACCTAATGACAGGACAAACAGCTAACGCCACCTCCCTCCTGGGGACGATGACTGACACCTTCCCTAACTATA  
TTTTGACCTGTGTGATTTAGTAGGAGACTACTGGGATGACCCAGAACCCGATATTGGGGATGGTTGCCGCACTCCCGGGG  
GAAGAAGAAGGACAAGACTGTATGACTTCTATGTTTGGCCCGGTCTACTGTACCAATAGGGTGTGGAGGGCCGGGAGAG  
GGCTACTGTGGCAAATGGGGATGTGAAACCACTGGACAGGCATACTGGAAGCCATCATCATCATGGGACCTAATTTCCCT  
TAAGCGAGGAAACACTCCTAAGGATCAGGGCCCCCTGTTATGATTTCCTCGGTCTCCAGTGGCGTCCAGGGTGCCACACCGG

GGGGTCGATGCAACCCCCCTGGTCTTAGAATTCACTGACGCGGGTAGAAAGGCCAGCTGGGATGCCCCAAAGTTTGGGGA  
CTAAGACTCTATCGATCCACAGGGGCCGACCCGGTGACCCGGTTCTCTTTGACCCGCCAGGTCTCAATGTAGGACCCCCG  
CGTCCCCATTGGGCCTAATCCCGTGATCACTGACCAGCTACCCCATCCCAACCCGTGCAGATCATGCTCCCCAGGCCTC  
CTCATCTCTCTCTTCAGGCACGGTCTCTATGGTACCTGGGGCTCCCCCGCCTTCTCAACAACCTGGGACGGGAGACAGG  
CTGCTAAATCTGGTAGAAGGAGCCTACCAAGCACTCAACCTCACCAGTCTTGACAAAACCCAAGAGTGCTGGTTGTGTCT  
GGTATCGGGACCCCCCTACTACGAAGGGGTTGCCGTCTTAGGTACCTACTCCAACCATACTCTGCCCCAGCTAACTGCT  
CCGTGGCCTCCCAACACAAGCTGACCCTGTCCGAAGTGACCGGACAGGGACTCTGCGTAGGAGCAGTTCCCAAAACCCAT  
CAGGCCCTGTGTAATACCACCCAGAAGACGAGCGACGGGTCTACTATCTGGCTGCTCCCGCCGGGACCATCTGGGCTTG  
CAACACCGGGCTCACTCCCTGCCTATCTACTACTGTACTCAACCTCACCACCGATTACTGTGTCTCTGGTTGAGCTCTGGC  
CAAAGGTGACCTACCCTCCCTGGTTATGTTTTATGGCCAGTTTGAGAAAAAACCAATATAAAAGGGAGCCGGTGTCA  
TTAACTCTGGCCCTGCTGTTGGGAGGACTTACTATGGGCGCATAGCTGCAGGAGTAGGAACAGGGACTACAGCCCTAGT  
GGCCACCAACAATTGAGCAGCTCCAGGCAGCCATACATACAGACCTTGGGGCCTTAGAAAAATCAGTCAGTGCCCTAG  
AAAAGTCTCTGACCTCGTTGTCTGAGGTGGTCTACAGAACCGGAGAGGATTAGATCTGCTGTTCTTAAAGAGGGAGGA  
TTATGTGCTGCCCTAAAAGAAGAATGCTGTTTCTACGCGGACCACACTGGCGTAGTAAGGGATAGCATGGCTAAGCTAAG  
AGAGAGACTAAACCAGAGACAAAAATTGTTTGAATCAGGACAAGGGTGGTTTGAAGGACTGTTTAAACAGGTCCCCATGGT  
TCACGACCCTGATATCCACCATTATGGGCCCTCTGATAGTACTTTTTATTAATCCTACTCTTCGGACCCTGTATTCTCAAC  
CGCTTGGTCCAGTTTGTAAAAGACAGAATTTCCGGTGGTGCAGGCCCTGGTTCTGACTCAACAGTATCACCAACTCAAATC  
AATAGATCCAGAAGCAGTGGAATCACGTGAATAAAAGATTTTATTAGTTTCCAGAAAGAGGGGGGAATGAAAGACCCCCA  
CCATAAGGCTTAGCAAGCTAGCTGCAGTAACGCCATTTTGAAGGCATGAAAAAGTACCAGAGCTGAGTTCTCAAAGTT  
ACAAGGAAGTTGATTAAAGATTAACAGTTACAAATCAAGGCTGAATAATACTAGGACAAGGGCCAAGAACCGATGGTAC  
CCAGATAAAGCGGAACAGCAACAGTTTCTGAAAAAGTCCACCTCAGTTTTCAGGTTCCCAAAATGACCAGGAAATACCC  
CAAGCCTTGATTTGAACTAACCCTCAGCTCGCTTCTCGCTTCTGTACCCGCGCTTTTTGCTCCCCAGCCCCAGCCCTAT  
AAAAGGGTAAGAACTCCACACTCGGCGCGCCAGTCTCCGACAGACTGAGTCGCCCCGGGTACCCGTGTTCCCAATAAAG  
CCTCTTGCTGATTACATCCGAATCGTGGTCTCGCTGATCCTTGGGAGGGTCTCCTCAGATTGATTGACCACCCACCTCGG  
GGGTCTTTCA

>Xmv12

TGAAAGACCCACCCATAAGGCTTAGCAAGCTAGCTGCAGTAACGCCATTTTGAAGGCATGAAAAAGTACCAGAGCTGAG  
TTCTCAAAGTTACAAGAAAGTTGATTAAAGATTAACAGTTAAAATCAAGGCTGAATAATACTAGGACAAGGGCCAAGA  
ACCGATGGTACCCACCGGGGCCCGGCTCAAGGCCAAGAACCGATGGTACCCACCTGGGCCCCGGCTCAGGGCCAAGAAC  
AGATGATACCCAGATAAGGCGGAACAGCAACAGTTTCTGAAAAAGTCCACCTCAGTTTTCAGGTTCCCAAAATGACCAG  
GAAATACCCCAAGCCTTGATTTGAACTAACCCTCAGCTCGCTTCTCGCTTCTGTACCCGCGCTTTTTGCTCCCCAGCCC  
TATAAAAAGGGTAAAAACCCACACTCGGCGCGCCAGTCTCCGAAAGACTGAGTCGCCCCGGGTACCCGTGTTCCCAATA  
AAGCCTCTTGCTGATTACATCCGAATCGTGGTCTCGCTGATCCTTGGGAGGGTCTCCTCAGATTGATTGACTACCCACCT  
CGGGGGTCTTTTCAATTTGGAGGTTCCACCGAGATTAGGAGACCCCTGCCAGGGACCACCGACCCCGCGGGAGGTAAGC  
TGGCCAGCGGTCTTTTCTGTCTGTCTCTGTCTCCGTGCGTGTTTTGTGCCGGCATCTAATGTTTGCGCCTGCGTCTGTAC  
TAGTTGGCTAACTAGATCTGTATCTGGCGGTTCCGCGGAAGAAGTACAGAGTTCTGATTCCCGGCCGAGCCCTGGGAGA  
CGTCCCAGCGGCCTCGGGGGCCCGTTTTGTGGCCATTCTGTATCAGTTAACCTGCCCGAGTCGGACTTTTTGGAGCTCC  
TCCACTGTCCGAGGGGTACGTGGCTTTGTGCGGGGACGAGAGGCAGAGACACTTCCCTCCCCCGTCTGAATTTTTGCTTT  
CGGTTTTACGCCGAAACCGCGCCGCGCTCTGATTTGTTTGTGTTCTTTTTGTTCTTCGTTAGTTTTCTCCTGTCTTTAA  
GTGTTTTTGAAGATCATGGGACAGACCGTAACCTACCCCTCTGAGTCTAACCTTGACGACTGGGGAGATGTCCAGCGCATT  
GCATCCAATCAGTCTGTGGATGTCAGGAAGAGGCGCTGGGTTACCTTCTGTTCCGCCGAATGGCCAACCTTCAATGTGGG  
ATGGCCTCAGGATGGTACTTTTAATTTAGGTATTATCTCTCAGGTCAAGTCTAGAGTGTTTTGTCTGGTCCCCACGGAC  
ACCCGGATCAGGTCCCATATATCGTCACCTGGGAGGCACTTGCCTATGACCCCCCTCCGTGGGTCAAACCGTTTGTCTCC  
CCAAAACCCCTCCTTTACCGACAGCTCCCGTCTCTCCCGCCCGTCTTCTGCGCAACCTCCGTCCCGATCTGCCCTTTA  
CCCTGCCCTTACCCCTCTATAAAGCCCAACCTCCTAAGCCCCAGGTTCTCCCTGATAACGGCGGACCTCTCATTGACC  
TTCTCAGAGAGACCCCCCGCCGTACGGAGCACAACTTCTCCTCTGCCAGAGGGAACGATAAAGAAGAGGCGGCCACC  
ACCTCCGAGGTTTTCCCCCCTTCTCCCATGGTGTCTCGACTGCGGGGAAGGAGAGACCCTCCCGCAGCGGACTCCACCTC  
CTCCCAGGCATTCCCACTCCGCATGGGGGGAGATGGCCAGCTTCAGTACTGGCCGTTTTCTCCTCAGACTTATATAATT  
GGAAAAATAATAACCTTCTTTTTCTGAAGACCCAGGTAAATTGACGGCCTTGATTGAGTCCGTCTCATACCCACCAG  
CCCACCTGGGACGACTGTCAGCAGTTGTTGGGGACCTGCTGACCGGAGAAGAAAAGCAGCGGGTGCTCCTAGAGGCTAG  
AAAGGCAGTCCGGGGCAATGATGGACGCCCCACTCAGTTGCCTAATGAAGTCAATGCTGCTTTTTCCCTTGAACGCCCCG  
ATTGGGATTACACCACTACAGAAGGTAGGAACCACCTAGTCCTCTATCGCCAGTTGCTCTTAGCGGGTCTCCAAAACGCG  
GGCAGGAGCCCCACCAATTTGGCCAAGGTAAAAGGGATAACCCAGGGACCTAATGAGTCTCCCTCAGCCTTTTTAGAGAG  
ACTCAAGGAGGCCTATCGCAGGTACACTCCTTATGACCCTGAGGACCCAGGGCAAGAAACCAATGTGTCTATGTCAATCA  
TCTGGCAGTCTGCCCCGATATCGGGCGAAAGTTAGAGCGGTTAGAAGACTTAAAGAGCAAGACCTTAGGAGACTTAGTG  
AGGGAAGCTGAAAGGATCTTTAATAAGCGAGAAACCCCGGAAGAAAGAGAGGAACGTATCAGGAGAGAAACAGAGGAAAA  
AGAAGAACCGCGTAGGGCAGAGGATGAGCAGAGAGAGAAAGAAAGGGACCGCAGAAGACATAGAGAGATGAGCAAGCTCT

TGGCCACTGTAGTTATTGGTCAGAGACAGGATAGACAGGGGGGAGAGCGGAGGAGGCCCCAACTTGATAAGGACCAATGC  
GCCTACTGCAAAGAAAAGGGACACTGGGCTAAGGACTGCCCAAAGAAGCCACGAGGGCCCCGAGGACCGAGGCCCCAGAC  
CTCCCTCCTGACCTTAGGTGACTAGGGAGGTGAGGGTCAGGAGCCCCCCCCCTGAACCCAGGATAACCCCTCAAAGTCGGGG  
GGCAACCCGTCACCTTCCTGGTAGATACTGGGGCCCAACACTCCGTGCTGACCCAAAATCCTGGACCCCTAAGTGACAAG  
TCTGCCTGGGTCCAAGGGGCTACTGGAGGAAAGCGGTATCGCTGGACCACGGATCGCAAAGTACATCTAGCTACCGGTAA  
GGTCACCCACTCTTTCCTCCATGTACCAGACTGCCCCATCCTCTGCTAGGAAGAGACTTGCTGACTAAACTAAAAGCCC  
AGATCCACTTCGAGGGATCAGGAGCTCAGGTTGTGGGACCAATGGGACAGCCCCCTGCAAGTGCTGACCCTAAACATAGAA  
GATGAGTATCGGCTACATGAGACCTCAAAGAGCCGGATGTTTCTCTAGGGTCCACATGGCTTTCTGATTTTCCCCAGGC  
CTGGGCAGAAAACCGGGGCTATGGGACTGGCAGTTCGCCAAGCGCCTCTGATTATACCTCTAAAGGCAACCTCTACCCCCG  
TGTCCATAAAACAATAACCCCATGTACAGGAAGCCAGACTGGGGATCAAGCCCCACATACAGAGGCTGTTGGACAGGGGA  
ATACTGGTACCCTGCCAGTCCCCCTGGAACACGCCCCCTGCTACCCGTTAAGAAACCAGGGACTAATGATTACAGGCCTGT  
CCAGGATCTGAGAGAAGTCAACAAGCGGGTGGAAGACATCCACCCACCGTGCCCAACCCTTACAACCTCTTGAGCGGGC  
TCCCACCGTCCCACAGTGGTACACTGTGCTTGATTTAAAGGATGCCTTTTTCTGCCTGAGACTCCACCCCCACAGTCAG  
CCTCTCTTCGCCTTTGAGTGAGAGATCCAGGGATGGGAATCTCAGGACAATTGACCTGGACCAGACTCCCACAGGGTTT  
CAAAAACAGTCCCACCCTGTTTGATGAGGCACTGCACAGAGACCTAGCAGACTTCCGGATCCAGCACCCAGACTTGATCC  
TGCTACAGTACGTGGATGACATACTACTGGCCGCCACTTCTGAGCTCGACTGCCAACAAGGTAAGTCTCGGGCCCTGTTACAA  
ACCCTAGGAAACCTCGGGTATCGGGCCTCGGCCAAGAAAGCCCAACTTTGCCAGAAACAGGTCAAGTATCTGGGGTATCT  
TCTAAAAGAGGGTCAGAGATGGCTGACTGAGGCCAGAAAAGAGACTGTGATGGGGCAGCCTACTCCGAAGACCCCTCGAC  
AACTAAGGGAGTTCTAGGGACGGCAGGCTTCTGTGCCTCTGGATCCCTGGGTTTGCGGAAATGGCAGCCCCCTTGTAT  
CCTCTTACCAAAACGGGGACTCTGTTTAATTGGGGCCAGACCAGCAAAAGGCCTATCAAGAAATCAAACAGGCCCTTCT  
AACTGCCCCCGCCCTGGGATTGCCAGATTTGACTAAGCCCTTTGAACTCTTTGTGACGAGAAGCAGGGCTACGCCAAAG  
GCGTCCTAACGCAAAAACCTGGGACCTTGGCGTCGGCCTGTGGCCTACCTGTCCAAAAGCTAGACCCAGTGGCAGCTGGG  
TGGCCCCCTTGCCCTACGGATGGTAGCAGCCATTGCCGTTCTGACAAAAGATGCAGGCAAGCTAACTATGGGACAGCCGCT  
AGTCATCCTGGCCCCCATGCAGTAGAGGCACTGGTCAAGCAACCCCCCTGACCGCTGGCTATCCAACGCCCGCATGACCC  
ACTACCAGGCAATGCTCCTAGACACTGACCGAGTTCAAGTTCGGACCAAGTGGTGGCCCTCAATCCTGCCACCTTGCTCCCT  
CTACCGGAAAAAGGAGCCCCCATGATTGCCTCGAGATCTTGGCTGAAACGCATGGAACCAGACCGGATCTCACCAGCCA  
GCCCATCCAGACGCCGACCACACCTGGTATACCGATGGGAGCAGCTTTTGAAGAAGGACAGCGAAAGGCTGGGGCAG  
CAGTAGCAGTGAACCGAGGTAATCTGGCGAGGGCCCTGCCAGCTGGAACGTCAGCCAGCGAGCCGAACTGGTCGCA  
CTCACCAAGCCCTGAAAAGTGCAGAAGGTGAAGAAGCTAAATGTTTACACTGATAGCCGCTATGCCTTCGCTACGGCCCA  
TGTTTCATGGGGAAATATATAGGAGACGGGGGTTGCTGACCTCAGAAGGCAAGGAAATCAAGAACAAAAGCGAGATCCTAG  
CCTTGCTGAAAGCCCTCTTTTTTGCCAAAGAGGCTCAGTATTATCCATTGCCCGGGACACCAAAAAGGGAACAGTGCTGAA  
GCCAGGGGCAACCGAATGGCGGATCAAGCAGCCAGGGAGGCAGCCATGAGAGAGATCACAGAAACTTCCACGCTCTTAAT  
AGAGGATTTCGTCCCGTATACTCCCAGTTACTTCCACTACACAGAGACTGACAGAAAAGACCTTCTGAGACTGGGAGCCG  
TATACGATGAGGACAAAAGGTATTGGGTCCTGCAGGGAAAACCTGTAATGCCTGACCAATTCACCTTTAAGCTCTTAGAC  
TCCCTACACCGGCTCACCCACCTCAACTATCAGAAGATGAAGGCACTCCTTGACCGGGAAGAGAGCCCTACTACATGTT  
AAATCGGGATAAAACTCTCCAGCACGTAACAGAATCCTGTACAGCTTGTGCTCAAGTAAATGCTAGTAAAGCCAAAATCG  
GAGCAAGGGTGCGAGCGCGGGGACACCGACCCGGCACCATTGGGAAATCGATTTTACCGAAGTTAAGCCAGGGCTGTAT  
GGACATAAGTATCTCCTGGTGTGTTGTGGACACATTCTCTGGCTGGGTAGAAGCATTTCACCAAGCGTGAAACTGCCAG  
GGTTGTGACCAAGAAGCTGCTTGAAGAAATTTTTCCAAGATTGGGGATGCCCCAGGTATTGGGAACAGATAATGGGCCTG  
CCTTCATCTCCCAGGTAAGTCAGTCGGTGGCCAAGTTGCTGGGGATTGATTGGAACCTGCATTGTGCTTACAGACCCAG  
AGTTCAGGTGAGGTAGAAAGAATGAACAGGACAATCAAGGAGACTTTAAACCAAATTAACGCTTGCAGCTGGCACTAGAGA  
CTGGGTACTCCTACTCCCCCTGGCCCTCTACCGAGCCCGGAATACTCCGGGCCCCCATGGACTTACTCCGTATGAAATTC  
TGATATGGGGCACCCCCGCCCCCTTGTCATTTTTCATGATCCTGAAATGTCAAAGTTAACTAATAGTCCCTCTCTCCAAGCT  
CACTTACAGGCCCTCCAAGCAGTACAACGAGAGGTCTGGAAGCCACTGGCCGCTGCTTATCAGGACCAGCTGGATCAGCC  
AGTGATACCACACCCCTTCCGCGTCGGTGACGCCGTGTGGGTACGCCGGCACCAGACTAAGAACCTTAGAACCCCGCTGGA  
AAGGACCTACACCGTCTGCTGACCACCCCCACCGCTCTCAAAGTAGACGGCATCTCTGCGTGGATACACGCCGCTCAC  
GTAAAGGCGGCGACAACCTCCTCCGGCCGGAACAGCATGGAAGGTCCAGCGTTCTCAAAATCCCTTAAAGATAAGATTAAAC  
CCGTGGGGCCCCCTGATAGTTATGGGGATCTTAGTGAGGGCAGGAGCCTCGGTACAACGTGACAGCCCTCACCAGGTCTT  
CAATGTTACTTGGAGAGTTACCAACCTAATGACAGGACAAACAGCTAACGCCACCTCCCTCCTGGGGACGATGACAGACA  
CCTTCCCTAAACTATATTTTTGACCTGTGTGATTTAGTAGGAGACTACTGGGATTGGGATGACCCAGATGGAGATGGTTGC  
CGCTCTCCCGGGGGAAGAAAAGGACAAGACTGTATGACTTCTATGTTTTGCCCCGGTCATACTGTACCAATAGGGTGTGG  
AGGACCGGGAGAGGGCTACTGTGGCAAATGGGGATGTGAGACCACTGGACAGGCATACTGGAAGCCATCATCATCATGGG  
ACCTAATTTCCCTTAAGCGAGGAAACACTCCTAAGGATCAGGGCCCCCTGTTATGATTCTCGGTCTCCAGTGGCGTCCAG  
GGTGCCACACCGGGGGGTGATGCAACCCCTAGTCTTAGAATTAAGTACGCGGGTAAAAGGCCAGCTGGGATGCCCC  
CAAAGTTTGGGGACTAAGACTCTACCGATCCACAGGGGCCGACCCGGTGACCCGGTTCTCTTTGACCCGCCAGGTCTCA  
ATGTAGGACCCCGCTCCCCATTGGGCCTAATCCCGTGATCACTGACCAGCTACCCCATCCCAACCCGTGCAGATCATG  
CTCCCCAGGCCTCCTCATCCTCCTCCTCAGGCACGGTCTCTATGGTACCTGGGGCTCCCCCGCCTTCTCAACAGCCTGG

GACGGGAGACAGGCTGCTAAATCTGGTAGACGGAGCCTACCAAGCACTCAACCTCACCAGTCCTGACAAAACCCAAGAGT  
GCTGGTTGTGTCTGGTATCGGGACCCCCCTACTACGAAGGGGTTGCCGTCTAGGTACCTACTCCAACCATACCTCTGCC  
CCAGCTAACTGCTCCGTGGCCTCCCAACACAAGCTGACCCTGTCCGAAGTGACCGGACAGGGACTCTGCGTAGGAGCAGT  
TCCCAAAACCCATCAGGCCCTGTGTAATACCACCCAGAAGACGAGCGACGGGTCTACTATCTGGCTGCTCCCGCCGGGA  
CCATCTGGGCTTGCAACACCGGGCTCACTCCCTGCCTATCTACTACTGTACTCAACCTCACCACCGATTACTGTGTCCTG  
GTTGAGCTCTGGCCAAAGGTGACCTACCACTCCCCTGGTTATGTTTATGGCCAGTTTGAGAGAAAAACCAATATAAAAG  
AGAGCCGGTGTCACTAACTCTGGCCCTGCTGTTGGGAGGACTTACTATGGGCGGCATAGCTGCAGGAGTAGGAACAGGGA  
CTACAGCCCTAGTGGCCACCAACAATTCGAGCAGCTCCAGGCAGCCATACATACAGACCTTGGGGCCTTAGAAAAATCA  
GTCAGTGCCCTAGAAAAGTCTCTGACCTCGTTGTCTGAGGTGGTCCTACAGAACCGGAGAGGATTAGATCTGCTGTTCTCT  
AAAAGAAGGAGGATTATGTGCTGCCCTAAAAGAAGAATGCTGTTTTCTACGCGGACCACACTGGCGTAGTGAGATAGCA  
TGGCAAAGCTAAGAGAAAGGTTAAACCAGAGACAAAAATTGTTTCAATCAGGACAAGGGTGGTTTTGAGGGACTGTTTAAAC  
AGGTCCCCATGGTTTACGACCTTGATATCCACCATTATGGGCCCTTGATAATACTTTTATTAATCCTACTCCTCGGACC  
CTGTATTCTCAACCGCTTGGTCCAGTTTGTAAAAGACAGAATTTCCGTGGTGCAGGCCCTGGTTCTGACCCAACAGTATC  
ACCAACTCAAATCAATAGATCCAGAAGAAGTGAATCACGTGAATAAAAGATTTTATTTCAGTTTCCAGAAAGAGGGGGGA  
ATGAAAGACCCACCATAAGGCTTAGCAAGCTAGCTGCAGTAACGCCATTTTGCAAGGCATGAAAAAGTACCAGAGCTGA  
GTTCTCAAAAGTTACAAGGAAGTTTCAAGTTAAAGATTAACAGTTAAAAATCAAGGCTGAATAATACTAGGACAAGGGCCAAG  
AACCGATGGTACCCACCGGGGCCCCGGCTCAAGGCCAAGAACCGATGGTACCCACCTGGGCCCCGGCTCAGGGCCAAGAA  
CAGATGATACCCAGATAAGGCGGAACAGCAACAGTTTCTGAAAAAGTCCCACCTCAGTTTTCAGGTTCCCCAAATGACCA  
GGAAATACCCCAAGCCTTGATTTGAACTAACCCTCAGCTCGCTTCTCGCTTCTGTACCCGCGCTTTTTGCTCCCCAGCC  
CTATAAAAGGGTAAAAACCCACACTCGGCGCGCCAGTCTCCGAAAGACTGAGTCGCCCCGGGTACCCGTGTTCCCAAT  
AAAGCCTCTTGCTGATTACATCCGAATCGTGGTCTCGCTGATCCTTGGGAGGGTCTCCTCAGATTGATTGACTACCCACC  
TCGGGGGTCTTTCA

>Xmv13

TGAAAGACCCACCATAAGGCTTAGCAAGCTAGCTGCAGTAACGCCATTTTGCAAGGCATGAAAAAGTACCAGAGCTGAG  
TTCTCAAAAGTTACAAGGAAGTTCAAGTTAAAGATTAACAGTTAAAAATCAAGGCTGAATAATACTAGGACAAGGGCCAAA  
CAGAATATCGGTGGTCAAGCGCCTGGGCCCCGGCTCAGGGCCAAGAACAGATGGTACCCAGATAAAGCGGAACAGCAAC  
AGTTTCTGAAAAAGTCCACCTCAGTTTTCAGTTTCCCCAAATGACAGGAAATACCCCAAGCCTTGATTTGAACTAACCA  
CTCAGTCTCGTTCTCGCTTCTGTATCCACGCTTTTTGCTCCCCAGCCACGCCCTATAAAAAGGGTAAAGAACTCCACACT  
CGGCGCGCAGTCTCCGATAGACTGAGTCGCCCCGGGTACCCGTGTTCCCAATAAAGCCTCTTGCTGATTACATCCGAAT  
CGTGGTCTCGCTGATCCTTGGGAGGGTCTCCTCAGATTGATTGACCACCCACCTCGGGGGTCTTTTCATTTGGAGGTCCCA  
CCGAGATTAGGAGACCCCTGCCAGGGACCACCGACCCCCCGCGGGAGGTAAGCTGGCCAGCGGTCTTTTCGTGTCTGTCT  
TCTGTCTCCGTGCGTGTCTGTGCCGGCATCTAATGTTTGCCTGCGTCTGTACTAGTTGGCTAACTAGATCTGAATCTG  
GCGGTTCCGTGGAAGAACTGACGAGTTCATATTCGCGCCGCGAGCCCTGGGAGACGTCTCAGAGGCATCGGGGGCCATCT  
TTGTGGCCCAATCTGTATCTGAGAACCCGACCCGTCTCGGACTCTTTGGAGCCTCTCCTTTGACCGAGGGATACGTGGTT  
CTGTTGGGCGGCGAGGGGCCGAAACGCTCCCCTCCCCATCTGAATTTTTGCTTTTCGGTTTTCCGCCGAAACCGCGCCGC  
GCGTCTTGTCTGTCTCTGTGTTGTTTTGTCAATTTGTGCGTTCGTTATTGTTTTGGACCGTTTCTAAAAATATGGGACAGA  
CCGTAACCACTCCTTTGAGTCTGACCCTAGAACACTGGGAGACGTCCAGCGCATTGCGTCCAACCAAGTCCGTGGACGTC  
AAGAAGAGACGTTGGGTACCTTCTGCTCTGCCGAATGGCCAACTTTCAATGTGGGATGGCCTCAGGATGGTACTTTTAA  
TTTGGACATTATTTTACAGGTTAAATCTAAGGTGTTCTCTCCCGGTCCCCACGGACACCCGGATCAGGTCCCATACATTG  
TCACCTGGGAGGCACTTGCCCTATGACCCCCCTCCGTGGGTCAAACCGTTTGTCTCTCCAAAACCCCTCCCTTACCGACA  
GCTCCCGTCTCTCCCGCCCGGTCTTCTGCGCAACCTCCGTCCCGATCTGCCCTTTACCCTGCCCTTACCCCTCTATAAA  
GTCCAAACCTCCTAAGCCCCAGGTTCTCCCTGATAGCGGCGGACCTCTCATTGACCTTCTCACAGAGGACCCCCCGCCGT  
ACGGAGCACAACTTCTCTCTCTGCCAGAGAAAACAATGAAGAAGAGGCGGCCGCCACCTCCGAGGTTTCCCCCTTCT  
CCCATGGTGTCTCGACTGCGGGGAAGGAGGGACCTCCCGCAGCGGACTCCACCTCCTCCAGGCATTCCCACTCCGCAT  
GGGGGAGATGGCCAGCTTCAGTATTGGCCGTTTTCTCTCGGACTTATACAATTGAAAAATAATAACCTTCTCTTTT  
CTGAAGACCCAGGTAATTGACGGCCTTGATTGAGTCCGTCTCATCACCCACAGCCACCTGGGACGACTGTCCAGCAG  
TTGTTAGGGACCTGCTGACCGGAGAAGAAAAGCAGCGGGTGTCTCCTAGAGGCTAGAAAGGCAGTCCGGGGCAATGATGG  
ACGCCCCACTCAGTTGCCTAATGAAGTCAATGCTGCTTTTTCCCTTGAACGCCCCGATTGGGATTACACCACTACAGAAG  
GTAGGAACCACCTAGTCCTCTATCGCCAGTTGCTCTTAGCGGGTCTCCAAAACGCGGGCAGAAGCCCCACCAATTTGGCC  
AAGGTAAAAGGGATAACCCAGGGACCTAATGAGTCTCCCTCAGCCTTTTTAGAGAGACTCAAGGAGGCCTATCGCAGGTA  
CACTCCTTATGACCCTGAGGACCCAGGGCAAGAAACCAATGTGTCTATGTCAATCATCTGGCAGTCTGCCCCGATATCG  
GGCGAAAGTTAGAGCGGTTAGAAGATTTAAAGAGCAAGACCTTAGGAGATTTAGTGAGGGAAGCTGAAAAGATCTTTAAT  
AAGCGAGAAACCCGGAAGAAAGAGAGGAACGTATCAGGAGAGAAACAGAGGAAAAAGAAGAACGCCGTAGGGCAGAGGA  
TGAGCAGAGAGAGAAAGAAAGGGACCGCAGGAGACATAGAGAGATGAGCAAGCTCTTGGCCACTGTAGTTAGTGAGCAGA  
GACAGGATAGACAGGGGGGAGAGCGAAGGAGGCCCAACTTGATAAGGACCAATGCGCCTACTGCAAAGAAAAGGGACAC  
TGGGCTAAGGACTGCCCAAAGAAGCCACGAGGGCCCCGAGGACCGAGGCCCCAGACCTCCCTCCTGACCTTAGGTGACTA  
GGGAGGTCAAGGTCAAGGAGCCCCCCCCCTGAACCCAGGATAACCTCAAAGTCGGGGGGCAACCCGTACCTTCTGGTAG

ATACTGGGGCCCAACACTCCGTGCTGACCCAAAATCCTGGACCCCTAAGTGACAAGTCTGCCTGGGTCCAAGGGGCTACT  
GGAGGAAAGCGGTATCGCTGGACCACGGATCGCAAAGTACATCTAGCTACCGGTAAGGTCACCCACTCTTTCCTCCATGT  
ACCAGACTGCCCCATCCTCTGCTAGGAAGAGACTTGCTGACTAAACTCAAAGCCAGATCCACTTCGAGGGATCAGGAG  
CTCAGGTTGTGGGACCAATGGGACAGCCCCCTGCAAGTGCTGACCCTAAACATAGAGGATGAGTATCGGCTACATGAGACC  
TCAACAGAGCCGGATGTTTCTCTAGGGTCCACCTGGCTTTCTGATTTTCCCCAGGCCTGGGCGGAAACCGGGGGCATGGG  
ACTGGCAGTTCGCCAAGCGCCTCTGATTATACCTCTAAAGGCAACCTCCACCCCTGTGTCCATAAAACAATACCCCATGT  
CGAAGAAGCCAGACTGGGGATCAAGCCCCACATACAGAGGCTGTTGGACCAGGGAATATTGGTACCCTGCCAGTCCCCC  
TGGAATACACCCCTGCTACCCGTTAAGAAACCAGGGACTAATGATTACAGGCCTGTCCAGGATCTGAGAGAAGTTAACAA  
GCGGGTAGAAGACATCCACCCACCGTGCCCAACCCTTACAACCTCTTAAGTGGGCTCCCACCGTCCCACCACTGGGTACA  
CTGTGCTTGATTTAAAGGATGCCTTTTTCTGCTGAGACTCCACCCACCAAGTCCAGCCTCTCTTCGCCTTTGAGTGGAGA  
GATCCAGGGATGGGAATCTCAGGACAATTGACCTGGACCAGACTCCCAAGGGTTTCAAAAACAGTCCCACCCCTGTTTGA  
TGAGGCACTGCACAGAGACCTAGCAGACTTCCGGATCCAGCACCCAGACTTGATCCTGCTACAGTACGTGGATGACATAC  
TACTGGCCGCCACTTCTGAGCTCGACTGCCAACAAGGTAAGTCTGGGCCCTGTTACTAACCCTAGGAAACCTCGGGTATCGG  
GCCTCGGCCAAGAAAGCCCAACTTTGCCAGAAGCAGGTCAAGTATCTGGGGTATCTTCTAAAAGAGGGTCAGAGATGGCT  
GACTGAGGCCAGAAAAGAGACTGTGATGGGGCAGCCTACTCCGAAGACCCCTCGACAACCTAAGGGAGTTCCTAGGGACGG  
CAGGCTTCTGTGCGCTCTGGATCCCTGGGTTTTCGGAAATGGCAGCCCCCTTGTATCCTCTTACCAAAACGGGGACTCTG  
TTTAATTGGGGCCAGACCAGCAAAAGGCCTATCAAGAAATCAAACAGGCCCTTCTAACTGCCCCCGCCCTGGGATTGCC  
AGATTTGACTAAGCCCTTTGAACTCTTTGTGACGAGAAGCAGGGCTACGCCAAAGGCGTCTTAACGCAAAAACCTGGGAC  
CTTGGCGTGGCCCTGTGGCCTACCTGTCCAAAAGCTAGACCCAGTGGCAGCTGGGTGGCCCCCTTGCCCTACGGATGGTA  
GCAGCCATTGCCATTCTGACAAAAGATGCAGGCAAGCTAACTATGGGACAGCCGCTAGTCATCCTGGCCCCCATGCAGT  
AGAGGCACTGGTCAAGCAACCCCTGACCGCTGGCTATCCAATGCCCGCATGACCCACTACCAGGCAATGCTCCTAGACA  
CTGACCGAGTTCAGTTCCGACCAAGTGGTGGCCCTCAATCCTGCCACCTTGCTCCCTCTACCGGAGAAAGGAGCCCCCAT  
GATTGCCTCGAGATCTTGGCTGAAACGCATGGAACCAGACCGGACCTCACCGACCAGCCCATCCCAGACGCCGACCACAC  
CTGGTATACCGATGGGAGCAGCTTTTTGCAAGAAGGACAGCGAAAAGCTGGGGCAGCAGTGACGACAGAGACCGAGGTAA  
TCTGGGCGAGGGCCCTGCCAGCTGGAACGTGAGCCAGCGAGCCGAACCTGATCGCACTCACCCAAGCCCTGAAAATGGCA  
GAAGGTAAGAAGCTAAATGTTTATACTGACAGCCGATATGCTTTTCGCCACGGCCCATGTCCATGGAGAAATCTATAGGAG  
GCGAGGTTGTGACCTCAGAGGCGAGAGAAATCAAAAACAGAGCGAGATCCTGGCTTTACTGAAAGCTCTTTTCTCTGC  
CTAAAAGACTCAGTATAATTCAGTCCCCGGGCATCAAAAGGGAACAGTGCTGAAGCCAGGGGCAACCGTATGCGAGAC  
CAAGCGGCCCCGAGAGGACGCCATAAGGACATCTCCAGAACTTCCACCCTCCTCATAGAGGACTCGACCCCGTATACGCC  
CTCCCATTTCCACTACACTGAAACAGATCTAAAGAGATTACGAGAAGTGGGAGCCACCTATAATCAGATAAAAGGATATT  
GGGTCTTACAAGGCAAGCCGGTAATGCCCGATCAGTTTGTGTTTGAACCTATTAGACTCCTTACACAGGCTCACTCACCTC  
AGCCCTCAAAAGATGAAGGCACTCCTTGACAGAGAAGAAAGCCCTACTACATGTTAAACAGAGACAGAAGTCTCCAGTA  
TGTGGCAGAATCATGCACAGCTTGTGCTCAAGTGAATGCTAGTAAAGCCAAGATCGGGGCAGGGGTACGAGTACGCGGAC  
ATCGACCAGGTACCCATTGGGAAATTGACTTTACTGAAGTTAAGCCAGGACTGTACGGGTACAAGTACCTCCTAGTGTTT  
GTGGACACCTTCTCTGGCTGGGTAGAAGCCTTCCCACTAAACGTGAAACCGCCAAAGTGGTAACCAAGAAGCTATTAGA  
AGAAATATTCCCAAGATTCCGGATGCCACAGGTACTGGGTTCTGACAATGGGCCTGCCTTCGTCTCCAGGTAAGTCATT  
CGGTGGCCGATTTACTGGGGATTGATTGGAAGTTACATTGCGCTTATAGACCCAGAGTTTCAGGTACGGTAGAGAGAATG  
AATAGAACCATCAAGGAGACTTTAACCAAATTAACGCTTGCAGCTGGCACTAGAGACTGGGTACTCCTACTCCCCCTTGGC  
CCTCTACCGAGCCCGGAATACTCCGGGCCACATGGACTTACTCCGTATGAAATTCTGTATGGGGCACCCCCGCCCCCTTG  
TCAATTTTCATGATCCTGAAATGTCAAAGTTAACTAATAGTCCCTCTCTCCAAGCTCACTTACAGGCCCTCCAAGCAGTA  
CAACGAGAGGTCTGGAAGCCACTGGCCGCTGCTTATCAGGACCAGCTGGATCAGCCAGTGATACCACACCCCTTCCGTGT  
CGGTGACGCCGTGTGGGTACGCCGGCACCAGACTAAGAACTTAGAACCCCGCTGGAAAGGACCCTACACCGTCTGTGTA  
CCACCCCCACCGCTCTCAAAGTAGACGGCATCTCTGCGTGGATACACGCCGCTCACGTAAAGGCGGCGACAACCTCTCCA  
GCCGGAACAGCATGGAAGGTCCAGCGTTCTCAAAACCCCTTAAAGATAAGATTAACCCGTGGGGCCCCCTAATAGTTATG  
GGGATCTTGGTGAGGGCAGGAGCCTCGGTACAACGTGACAGCCCTCACCAGATCTTCAATGTTACTTTGGAGAGTTACCAA  
CCTAATGACAGGACAAACAGCTAACGCCACCTCCCTCCTGGGGACGATGACAGACACCTTCCCTAAACTATATTTTGACC  
TGTGTGATTTAGTAGGAGACTACTGGGATGACCCAGAACCCGATATTGGGGATGGTTGCCGCACTCCCGGGGGAAGAAGA  
AGGACAAGACTGTATGACTTCTATGTTTGGCCCGGTACATACTGTACCAATAGGGTGTGGAGGGCCGGGAGAGGGCTACTG  
TGGCAAATGGGGATGTGAGACCCTGGACAGGCATACTGGAAGCCATCATCATCATGGGACCTAATTTCCCTTAAGCGAG  
GAAACACTCCTAAGGATCAGGGCCCCCTGTTATGATTCTCGGTCTCCAGTGGCGTCCAGGGTGCCACACCGGGGGGTGGA  
TGCAACCCCTGGTCTTAGAATTCAGTGACGCGGGTAGAAAGGCCAGCTGGGATGCCCCCAAAGTTTGGGGACTAAGACT  
CTATCGATCCACAGGGGCCGACCCGGTGACCCGGTTCTCTTTGACCCGCCAGGTCTCAATGTAGGACCCCGCGTCCCCA  
TTGGGCCTAATCCCGTGATCACTGACCAGCTACCCCATCCCAACCCGTGCAGATCATGCTCCCCAGGCCTCCTCATCCT  
CCTCCTTCAGGCACGGTCTCTATGTTACCTGGGGCTCCCCCGCCTTCTCAACAACCTGGGACGGGAGACAGGCTGCTAAA  
TCTGGTAGAAGGAGCCTACCAAGCACTCAACCTCACCAGTCTGTACAAAACCCAAGAGTGCTGGTTGTGTCTGGTATCGG  
GACCCCTACTACGAAGGGGTTGCCGTCTAGGCACCTACTCCAACCATACCTCTGCCCCAGCTAACTGCTCCGTGGCC  
TCCCAACACAAGCTGACCCTGTCCGAAGTAACCGGACAGGGACTCTGCGTAGGAGCAGTTCCCAAAACCCATCAGGCCCT

GTGTAATACCACCCAAAAGACGAGCGACGGGTCTCTACTATCTGGCTGCTCCCGCCGGGACCATCTGGGCTTGCAACACCG  
GGCTCACTCCCTGCCTATCTACTACTGTACTCAACCTCACCACCGATTACTGTGTCTCTGGTTGAGCTCTGGCCAAAGGTG  
ACCTACCACTCCCCTGGTTATGTTTATGGCCAGTTTGAGAGAAAAACCAATATAAAAGAGAGCCGGTGTCTTAATCTCT  
GGCCCTGCTGTTAGGAGGACTTACTATGGGCGGCATAGCTGCAGGAGTAGGAACAGGGACTACAGCCCTAGTGGCCACCA  
AACAATTCGAGCAACTCCAGGCAGCCATACATACAGACCTTGGGGCCTTAGAAAAATCAGTCAGTGCCCTAGAAAAGTCT  
CTGACCTCGTTGTCTGAGGTGGTCCTACAGAACCGGAGAGGATTAGATCTGCTGTTTCTTAAAGAAGGAGGATTATGTGC  
TGCCCTAAAAGAAGAATGCTGTTTCTACGCGGACCACACTGGCGTAGTAAGGGATAGCATGGCTAAGCTAAGAGAGAGAC  
TAAACCAGAGACAAAAATTGTTTCAATCAGGACAAGGGTGGTTTGAGGGACTGTTTAAACAGGTCCCATGGTTCACGACC  
CTGACATCCACATTATGGGCCCTCTGATAGTACTTTTATTAATCCTACTCTTCGGACCCTGTATTCTCAACCGCTTGGT  
CCAGTTTGTAAAAGACAGAATTTTCGGTGGTGCAGGCCCTGGTCCTGACCCAACAGTATCACCAACTCAAATCAATAGATC  
CAGAAGCAGTGGAACACGTGAATAAAAGATTTTATTAGTTTCCAGAAAGAGGGGGAATGAAAGACCCACCATAAGG  
CTTAGCAAGCTAGCTGCAGTAACGCCATTTTGAAGGCATGAAAAAGTACCAGAGCTGAGTTCTCAAAAGTTACAAGGAA  
GTTTCAGTTAAAGATTAAACAGTTAAAAATCAAGGCTGAATAATACTAGGACAAGGGCCAAACAGAATATCGGTGGTCAAGC  
GCCTGGGCCCCGGCTCAGGGCCAAGAACAGATGGTACCCAGATAAAGCGGAACCAGCAACAGTTTCTGAAAAAGTCCAC  
CTCAGTTTCAGGTTCCCCAAATGACCAGGAAATACCCCAAGCCTTGATTTGAACTAACCCTCAGCTCGCTTCTCGCTTC  
TGTACCCACGCTTTTTTGTCTCCCCAGCCCCAGCCCTATAAAAAGGGTAAGAACTCCACACTCGGCGCGCCAGTCTCTCGAT  
AGACTGAGTCGCCCCGGGTACCCGTGTTCCCAATAAAGCCTCTTGCTGATTACATCCGAATCGTGGTCTCGCTGATCCTTG  
GGAGGGTCTCTCTCAGATTGATTGACCACCCACCTCGGGGGTCTTTCA

>Xmv15

TGAAAGACCCCACCATAAGGCTTAGCAAGCTAGCTGCAGTAACGCCATTTTGAAGGCATGAAAAAGTACCAGAGCTGAG  
TTCTCAAAAGTTACAAGGAAGTTCAAGTTAAAGATTAAACAGTTAAAAATCAAGGCTGAATAATACTAGGACAAGGGCCAAG  
AACCGATGGTACCCACCTGGGCCCCGGCTCAAGGCCAAGAACCGATGGTACCCACCTGGGCCCCGGCTCAGGGCCAAGAA  
CAGATGGTACCCAGATAAGGCGGAACCAGCAACAGTTTCTGAAAAAGTCCCACCTCAGTTTCAGGTTCCCCAAATGACCA  
GGAAATACCCCAAGCCTTGATTTGAACTAACCCTCAGCTCGCTTCTCGCTTCTGTACCCGCGCTTTTTGTCTCCCCAGCC  
CTATAAAAAGGGTAAAAACCCACACTCGGCGCGCCAGTCTCTCCGATAGACTGAGTCGCCCGGGTACCCGTGTTCCCAAT  
AAAGCCTCTTGCTGATTACATCCGAATCGTGGTCTCGCTGATCCTTGGGAGGGTCTCCTCAGATTGATTGACTACCCACC  
TCGGGGGTCTTTTCAATTTGGAGGTCCCACCGAGATTAGGAGACCCCTGCCAGGGACCACCCCGGGGAGGTAAG  
CTGGCCAGCGGTGCTTTCGTGTCTGTCTGTCTCGTCTCGTGTGTTTGTGCCGCGCATCTAATGTTTGGCCTCGCTGTGTA  
CTAGTTGGCTAACTAGATCTGTATCTGGCGGTTCCGCGGAAGAAGTACGAGTTTCGTATTCCCGGCCGCGAGCCCTGGGAG  
ACGTCCCAGCGGCCTCGGGGGCCCGTTTTGTGGCCATTCTGTATCAGTTAACCTACCCGAGTCGGACTTTTTGGAGCTC  
CTCCACTGTACGTGGCTTTGTCTGGGGGACGAGAGGCAGAGACACTTCCCTCCCCCGTCTGAATTTTTGTCTTTCGGTTTTTA  
CGCCGAAACCGCGCCGCGCTGATTTGTTTGTGTTCTTTTGTCTTCTCGTTAGTTTTCTCTGTCTTTAAGTGTTTTT  
GAGATCATGGGACAGACCGTAACCTACCCCTCTGAGTCTAACCTTGACGACTGGGGAGATGTCCAGCGCATTGCATCCAA  
TCAGTCTGTGGATGTGAGGAAGAGGCGCTGGGTTACCTTCTGTTCCGCCGAATGGCCAACTTTCAATGTGGGATGGCCTC  
AGGATGGTACTTTTAATTTAGGTATTATCTCTCAGGTCAAGTCTAGAGTGTTTTGTCTGGTCCCCACGGACACCCGGAT  
CAGGTCCCATATATCGTCACCTGGGAGGCACTTGCCCTATGACCCCCCTCCGTGGGTCAAACCGTTTGTCTCTCCAAAACC  
CCCTCCTTTACCGACAGCTCCCGTCTCTCCGCCCCGTCTTCTGCGCAACCTCCGTCCCGATCTGCCCTTTACCCCTGCC  
TTACCCCTCTATAAAGCCCAAACCTCCTAAGCCCCAGGTTCTCCCTGATAACGGCGGACCTCTCATTGACCTTCTCACA  
GAGGACCCCCCGCCGTACGGAGCACAACTTCTCTCTGCCAGAGGGAACGATGAAGAAGAGGGCGGCCACCACCTCCGA  
GGTTTTCCCCCCTTCTCCCATGGTGTCTCGACTGCGGGGAAGGAGAGACCCTCCCGCAGCGGACTCCACCTCCTCCCAGG  
CATTCCCCTCCGATGGGGGGAGATGGCCAGCTTCAGTACTGGCCGTTTTCTCTCTGACTTATATAATTGGAAAAAT  
AATAACCTTCTCTTTCTGAAGATCCAGGTAAATTGACGGCCTTGATTGAGTCCGTCTCATACCCACCAGCCCACCTG  
GGACGACTGTGAGCAGTTGTTGGGGACCCTGCTGACCGGAGAAGAAAAGCAGCGGGTGCTCCTAGAGGCTAGAAAGGCAG  
TCCGGGGCAATGATGGACGCCCCACTCAGTTGCCTAATGAAGTCAATGCTGCTTTTCCCTTGAACGCCCCGATTGGGAT  
TACACCACTACAGAAGGTAGGAACACCTAGTCTCTATCGCCAGTTGCTCTTAGCGGGTCTCCAAAACGCGGGCAGGAG  
CCCCACCAATTTGGCCAAGGTAAAAGGGATAACCCAGGGACCTAATGAGTCTCCCTCAGCCTTTTTAGAGAGACTCAAGG  
AGGCCTATCGCAGGTACACTCCTTATGACCTGAGGACCCAGGGCAAGAAAACCAATGTGTCTATGTCAATCATCTGGCAG  
TCTGCCCCGATATCGGGCGAAAGTTAGAGCGGTTAGAAGATTTAAAGAGCAAGACCTTAGGAGACTTAGTGAGGGAAGC  
TGAAAGGATCTTTAATAAGCGAGAAACCCCGGAAGAAAGAGAGGAACGTATCAGGAGAGAAACAGAGGAAAAAGAAGAAC  
GCCGTAGGGCAGAGGATGAGCAGAGAGAGAAAGAAAGGGACCGCAGAAGACATAGAGAGATGAGCAAGCTCTTGGCCACT  
GTAGTTATTGGTCAGAGACAGGATAGACAGGGGGGAGAGCGAAGGAGGCCCAACTTGATAAGGACCAATGCGCCTACTG  
CAAAGAAAAGGGACACTGGGCTAAGGACTGCCCAAAGAAGCCACGAGGGCCCCGAGGACCGAGGCCCCAGACCTCCCTCC  
TGACCTTAGGTGACTAGGGAGGTGAGGGTCAGGAGCCCCCTGAACCCAGGATAACCTCAAAGTCGGGGGGCAACCCG  
TCACCTTCTGTTAGATACTGGGGCCCAACACTCCGTGCTGACCCAAAATCCTGGACCCCTAAGTGACAAGTCTGCCTGG  
GTCCAAGGGGCTACTGGAGGAAAGCGGTATCGCTGGACCACGGATCGCAAAGTACATCTAGCTACCGGTAAGGTACCCCA  
CTCTTTCTCCATGTACCAGACTGCCCTATCCTCTGCTAGGAAGAGACTTGCTGACTAACTAAAAGCCCAGATCCACT  
TCGAGGGATCAGGAGCTCAGGTTGTGGGACCAATGGGACAGCCCCCTGCAAGTGCTGACCCTAAACATAGAAGATGAGTAT

CGGCTACATGAGACCTCAAAGAGCCGGATGTTTCTCTAGGGTCCACATGGCTTTCTGATTTTCCCCAGGCCTGGGCAGA  
AACCGGGGGCATGGGACTGGCAGTTTCGCCAAGCGCCTCTGATTATACCTCTAAAGGCAACCTCTACCCCCGTGTCCATAA  
AACAAATACCCCATGTACAGGAAGCCAGACTGGGGATCAAGCCCCACATACAGAGGCTGTTGGACCAGGGAATACTGGTA  
CCCTGCCAGTCCCCCTGGAACACGCCCCCTGCTACCCGTTAAGAAACCAGGGACTAATGATTACAGGCCTGTCCAGGATCT  
GAGAGAAGTCAACAAGCGGGTGAAGACATCCACCCCACCGTGCCCAACCCTTACAACCTCTTGAGCGGGCTCCCACCGT  
CCCACCAGTGGTACACTGTGCTTGATTTAAAGGATGCCTTTTTCTGCCTGAGACTCCACCCCACAGTCAGCCTCTCTTC  
GCCTTTGAGTGGAGAGATCCAGGGATGGGAATCTCAGGACAATTGACCTGGACCAGACTCCCACAGGGTTTCAAAAACAG  
TCCCACCCTGTTTGATGAGGCACTACACAGAGACCTAGCAGACTTCGGATCCAGCACCCAGACTTGATCCTGCTACAGT  
ACGTGGATGACATACTACTGGCCGCCACTTCTGAGCTCGACTGCCAACAAGGTACTCGGGCCCTGTTACAAACCCCTAGGA  
AACCTCGGGTATCGGGCCTCGGCCAAGAAAGCCCAACTTTGCCAGAAACAGGTCAAGTATCTGGGGTATCTTCTAAAAGA  
GGGTGAGAGATGGCTGACTGAGGCCAGAAAAGAGACTGTGATGGGGCAGCCTACTCCGAAGACCCCTCGACAACCTAAGGG  
AGTTCCTAGGGACGGCAGGCTTCTGTGCGCTCTGGATCCCTGGGTTTGCGGAAATGGCAGCCCCCTTGATCCTCTTACC  
AAAACGGGGACTCTGTTTAATTGGGGCCCAGACCAGCAAAAGGCCTATCAAGAAATCAAACAGGCCCTTCTAACTGCCCC  
CGCCCTGGGATTGCCAGATTTGACTAAGCCCTTTGAACTCTTTGTGACGAGAGAAGCAGGGCTACGCCAAAGGCGTCTTAA  
CGCAAAAACCTGGGACCTTGGCGTTCGGCCTGTGGCCTACCTGTCCAAAAGCTAGACCCAGTGGCAGCTGGGTGGCCCCCT  
TGCCTACGGATGGTAGCAGCCATTGCCGTTCTGACAAAAGATGCAGGCAAGCTAACTATGGGACAGCCGCTAGTCATCCT  
GGCCCCCATGCGTAGAGGCACTGGTCAAGCAACCCCTGACCGCTGGCTATCCAACGCCCCGATGACCCACTACCAGG  
CAATGCTCCTAGACACTGACCGAGTTTCAGTTTCGGACCACTGGTGGCCCTCAATCCTGCCACCTTGCTCCCTCTACCGGAA  
AAAGGAGCCCCCATGATTGCCTCGAGATCTTGCTGAAACGCATGGAACCAGACCGGATCTCACCGACCAGCCCATCCC  
AGACGCCGACCACACCTGGTATACCGATGGGAGCAGCTTTTTGCAAGAAGGACAGCGAAAGGCTGGGGCAGCAGTGACGA  
CTGAAACCGAGGTAATCTGGGCGAGGGCCCTGCCAGCTGGAACGTGAGCCAGCGAGCCGAAGTATCGCACTCACCCAA  
GCCCTGAAAATGGCAGAAGGTAAGAAGCTAAATGTTTACACTGATAGCCGCTATGCCTTCGCTACGGCCCATGTTTCATGG  
GGAAATATATAGGAGACGGGGGTTGCTGACCTCAGAAGGCAAGGAAATCAAGAACAAAAGCGAGATCCTAGCCTTGCTGA  
AAGCCCTCTTTTTGCCAAAGAGGCTCAGTATTATCCATTGCCCGGGACACCAAAAAGGGAACAGTGCTGAAGCCAGGGGC  
AACCGAATGGCGGATCAAGCAGCCAGGGAGGCAGCCATGAGAGAGATCACAGAAACTTCCACGCTCTTAATAGAGGATTC  
GTCCCCGTATACTCCCAGTTACTTCCACTACACAGAGACTGACAGAAAAGACCTTCTGAGACTGGGAGCCGTATACGATG  
AGGACAAAAGGTATTGGTCTCTGCAGGGAAGCACTGTAATGCTGACCAATTACCTTTGAGCTCTTAGACTCCCTACAC  
CGGCTACCCACCTCAGGCTATCAGAAGATGAAGGCATCCTTGACCGGGAAGAGAGCCCCCTACTACATGTTAAATCGGGG  
TAGAACTCTCCAGCACGTAAACAGAATCCTGTACAGCTTGCTCAAGTAAATGCTAGTAAAGCCAAAATCGGAGCAAGGG  
TGCGAGCGCGGGGACACCGACCCGGCACCCATTGGGAAATCGATTTTACCAGGTTAAGCCAGGGCTGTATGGACATAAG  
TACCTCCTGGTGTTTTGTGGACACATTCTCTGGCTGGGTAGAAGCATTTCCAACCAAGCGTGAAACTGCCAGGGTTGTGAC  
CAAGAAGCTGCTTGAAGAAATTTTTCCAAGATTGCGGATGCCCCAGGTATTGGGGACAGATAATGGGCCTGCCTTCATCT  
CCCAGGTAAGTCAGTCGGTGGCCAAGTTGCTGGGGATTGATTGGAACTGCATTGTGCTTACAGACCCCAGAGTTCAGGT  
CAGGTAGAAAGAATGAACAGGACAATCAAGGAGACTTTAACCATAATTAACGCTTGACGCTGGCACTAGAGACTGGGTACT  
CCTACTCCCCCTGGCCCTCTACCGAGCCCGGAATACTCCGGGCCCCCATGGACTTACTCCGTATGAAATTCTGTATGGGG  
CACCCCCGCCCCCTTGTCATTTTTCATGATCCTGAAATGTCAAAGTTAACTAATAGTCCCTCTCTCCAAGCTCACTTACAG  
GCCCTCCAAGCAGTACAACGAGAGGTCTGGAAGCCACTGGCCGCTGCTTATCAGGACCAGCTGGATCAGCCAGTGATACC  
ACACCCCTTCCGCGTCGGTGACGCCGTGTGGGTACGCCGGCACCCAGACTAAGAAGTTAGAACCCCGCTGGAAAGGACCCCT  
ACACCGTCTCTGCTGACCACCCCCACCGCTCTCAAAGTAGACGGCATCTCTGCGTGGATACACGCCGCTCACGTAAAGGCG  
GCGACAACCTCCTCCGGCCGGAACAGCATGGAAGGTCCAGCGTTCTCAAAATCCCTTAAAGATAAGATTAACCCGTGGGGC  
CCCCTGATAGTTATGGGGATCTTAGTGAGGGCAGGAGCCTCGGTACAACGTGACAGCCCTCACCAGGTCTTCAATGTTAC  
TTGGAGAGTTACCAACCTAATGACAGGACAAACAGCTAACGCCACCTCCCTCCTGGGGACGATGACAGACACCTTCCCTA  
AACTATATTTTGACCTGTGTGATTTAGTAGGAGACTACTGGGATGACCCAGATGGAGATGGTTGCCGCTCTCCCGGGGA  
AGAAAAAGGACAAGACTGTATGACTTCTATGTTTGGCCCGGTCATACTGTACCAATAGGGTGTGGAGGGCCGGGAGAGGG  
CTACTGTGGCAAATGGGGATGTGAGACCACTGGACAGGCATCTGGAAGCCATCATCATCATGGGACCTAATTTCCCTTA  
AGCGAGGAAACACTCCTAAGGATCAGGGCCCCCTGTTATGATTCTCGGTCTCCAGTGCGCTCCAGGGTGCCACACCGGGG  
GGTCGATGCAACCCCTAGTCTTAGAATTCACTGACGCGGGTAAAAAGGCCAGCTGGGATGCCCCCAAAGTTTGGGGACT  
AAGACTCTACCGATCCACAGGGGCGGACCCGGTGACCCGGTTCTCTTTGACCCGCGGGTCTCAATGTAGGACCCCGCG  
TCCCCATTGGGCCTAATCCCGTGATCACTGACCAGCTACCCCATCCCAACCCGTGACAGATCATGCTCCCCAGGCCTCCT  
CATCCTCCTCCTTCAGGCACGGTCTCTATGGTACCTGGGGCTCCCCCGCCTTCTCAACAGCCTGGGACGGGAGACAGGCT  
GCTAAATCTGGTAGACGGAGCCTACCAAGCACTCAACCTCACCAGTCTGACAAAACCAAGAGTGCTGGTTGTGTCTGG  
TATCGGGACCCCCCTACTACGAAGGGGTTGCCGTCTAGGTACCTACTCCAACCATACTCTGCCCCAGCTAACTGCTCC  
GTGGCCTCCCAACACAAGCTGACCCTGTCCGAAGTGACCGGACAGGGACTCTGCGTAGGAGCAGTTCCCAAAACCCATCA  
GGCCCTGTGTAATACCACCCAGAAGACGAGCGACGGGTCTACTATCTGGCTGCTCCCGCCGGGACCATCTGGGCTTGCA  
ACACCGGGCTCACTCCCTGCCTATCTACTACTGTACTCAACCTCACCACCGATTACTGTGTCCTGGTTGAGCTCTGGCCA  
AAGGTGACCTACCACTCCCCTGGTTATGTTTATGGCCAGTTTGAGAGAAAAACCAATATAAAAGAGAGCCGGTGTCAAT  
AACTCTGGCCCTGCTGTTGGGAGGACTTACTATGGGCGGCATAGCTGCAGGAGTAGGAACAGGGACTACAGCCCTAGTGG

CCACCAAACAATTTCGAGCAGCTCCAGGCAGCCATACATACAGACCTTGGGGCCCTTAGAAAAATCAGTCAGTGCCCTAGAA  
AAGTCTCTGACCTCGTTGTCTGAGGTGGTCTACAGAACCGGAGAGGATTAGATCTGCTGTTCCCTAAAAGAAGGAGGATT  
ATGTGCTGCCCTAAAAGAAGAATGCTGTTTCTACGCGGACCACACTGGCGTAGTGAGAGATAGCATGGCAAAGCTAAGAG  
AAAGGTTAAACCAGAGACAAAAATTGTTTCAATCAGGACAAGGGTGGTTTGGAGGACTGTTTAAACAGGTCCCCATGGTTC  
ACGACCTTGATATCCACCATTATGGGCCCTTGATAATACTTTTATTAATCCTACTCCTCGGACCCTGTATTCTCAACCG  
CTTGGTCCAGTTTGTAAAAGACAGAATTCGGTGGTGCAGGCCCTGGTTCAGACCAACAGTATCACCAACTCAAATCAA  
TAGATCCAGAAGAAGTGAATCACGTGAATAAAAGATTTTATTAGTTTCCAGAAAGAGGGGGGAATGAAAGACCCCACC  
ATAAGGCTTAGCAAGCTAGCTGCAGTAACGCCATTTTGCAAGGCATGAAAAAGTACCAGAGCTGAGTTCTCAAAAGTTAC  
AAGGAAGTTTCAAGTTAAAGATTAACAGTTAAAAATCAAGGCTGAATAATACTAGGACAAGGGCCAAGAACCGATGGTACCC  
ACCTGGGCCCCGGCTCAAGGCCAAGAACCGATGGTACCCACCTGGGCCCCGGCTCAAGGCCAAGAACCGATGGTACCCAC  
CTGGGCCCCGGCTCAGGGCCAAGAACAGATGGTACCCAGATAAGGCGGAACCAGCAACAGTTTCTGAAAAAGTCCACCT  
CAGTTTTCAGGTTCCCAAATGACCAGGAAATACCCCAAGCCTTGATTTGAACTAACCCTCAGCTCGCTTCTCGCTTCTG  
TACCCGCGCTTTTTGCTCCCCAGCCCTATAAAAAGGGTAAAAACCCACACTCGGCGCGCCAGTCTCCTCCGATAGACTGAG  
TCGCCCCGGGTACCCGTGTTCCCAATAAAGCCTCTTGCTGATTACATCCGAATCGTGGTCTCGCTGATCCTTGGGAGGGTC  
TCCTCAGATTGATTGACTACCCACCTCGGGGGTCTTTCA

>Xmv16

TGAAAGACCCCACCATAAGGCTTAGCAAGCTAGCTGCAGTAACGCCATTTTGCAAGGCATGAAAAAGTACCAGAGCTGAG  
TTCTCAAAAGTTACAAGGAAGTTCAAGTTAAAGATTAACAGTTAAAAATCAAGGCTGAATAATACTAGGACAAGGGCCAAG  
AACCGATGGTGCCACCTGGGCCCCGGCTCAAGGCCAAGAACCGGTGGTACCCACCTGGGCCCCGGCTCAGGGCCAAGAA  
CAGATGGTACCCAGATAAGGCGGAACCAGCAACAGTTTCTGAAAAAGTCCACCTCAGTTTTCAGGTTCCCAAATGACCA  
GGAAATACCCCCAGCCTTGATTTGAACTAACCCTCAGCTCGCTTCTCGCTTCTGTACCCGCGCTTTTTGCTCCCCAGCC  
CTATAAAAAGGGTAAGAAGTCCACACTCGGCGCGCCAGTCTCCTCCGACAGACTGAGTCGCCCCGGGTACCCGTGTTCCCAAT  
AAAGCCTCATGCTGATTACATCCGAATCGTGGTCTCGCTGATCCTTGGGAGGGTCTCCTCAGATTGATTGACCACCCACC  
TCGGAGGTCTTTCATTTGGAGGCCCCAGCGAGATAAGGACCAATGCGCCTACTGCAAAGAAAAGGGACACTGGGCTAAGG  
ACTGCCCAAAGAAGCCACGAGGGCCCCGAGGACCGAGGCCCCAGACCTCCCTCCTGACCTTAGGTGACTAGGGAGGTGAG  
GGTCAGGAGCCCCCCCCCTGAACCCAGGATAACCCCTCAAAGTCGGGGGGCAACCCGTCACCTTCTGGTAGATACTGGGGC  
CCAACACTCCGTGCTGACCCAAAATCCTGGACCCCTAAGTGACAAGTCTGCCTGGGTCCAAGGGGTACTGGAGGAAAGC  
GGTATCGCTGGACCAAGGATCGCAAAGTACATCTAGTACCCGTAAGGTACCCACTCTTTTCTCCATGACCAGACTGCTG  
CCCTATCCTCTGCTAGGAAGAGACTTGCTGACTAAACTCAAAGCCAGATCCACTTCGAGGGATCAGGAGCTCAGGTTGT  
GGGACCAATGGGACAGCCCCCTGCAAGTGCTGACCCTAAACATAGAGGATGAGTATCGGCTACATGAGACCTCAACAGAGC  
CGGATGTTTTCTCTAGGGTCCACCTGGCTTTCTGATTTTTCCCCAGGCCTGGGCGGAAACCGGGGGCATGGGACTGGCAGTT  
CGCCAAGCGCCTCTGATTATACCTCTAAAGGCAACCTCCACCCCTGTGTCCATAAAACAATACCCCATGTGCGAAGAAGC  
CAGACTGGGGATCAAGCCCCACATACAGAGGCTGTTGGACCAGGGAATATTGGTACCCTGCCAGTCCCCCTGGAATACAC  
CCCTGCTACCCGTTAAGAAACCAGGGACTAATGATTACAGGCCTGTCCAGGATCTGAGAGAAGTTAAACAAGCGGGTAGAA  
GACATCCACCCACCGTGCCCAACCCCTTACAACCTCTTAAGTGGGCTCCACCGTCCACCAAGTGGTACACTGTGCTTGA  
TTTAAAGGATGCCTTTTTCTGCCTGAGACTCCACCCACCAAGTCAAGCCTCTCTTCGCCTTTGAGTGGAGAGATCCAGGGA  
TGGAATCTCAGGACAATTGACCTGGACCAGACTCCACAGGGTTTCAAAAACAGTCCACCCCTGTTTGATGAGGCACTG  
CACAGAGACCTAGCAGACTTCCGGATCCAGCACCCAGACTTGATCCTGCTACAGTACGTGGATGACATACTACTGGCCGC  
CACTTCTGAGCTCGACTGCCAACAAGGTACTCGGGCCCTGTTACTAACCCTAGGAAACCTCGGGGTATCGGGCCTCGGCCA  
AGAAAGCCCAACTTTGCCAGAAGCAGGTCAAGTATCTGGGGTATCTTCTAAAAGAGGGTCAGAGATGGCTGACTGAGGCC  
AGAAAAGAGACTGTGATGGGGCAGCCTACTCCGAAGACCCCTCGACAACCTAAGGGAGTTCTTAGGGACGGCAGGCTTCTG  
TCGCCTCTGGATCCCTGGGTTTGCAGAAATGGCAGCCCCCTTGATCCTCTTACCAAAACGGGGACTCTGTTTAAATTGGG  
GCCCAGACCAGCAAAAGGCCTATCAAGAAATCAAACAGGCCCTTCTAACTGCCCCCGCCCTGGGATTGCCAGATTTGACT  
AAGCCCTTTGAACTCTTTGTGACGAGAAGCAGGGCTACGCCAAAGGCGTCTTAACGCAAAAACCTGGGACCTTGGCGTCTG  
GCCTGTGGCCTACCTGTCCAAAAGCTAGACCCAGTGGCAGCTGGGTGGCCCCCTTGCCTACGGATGGTAGCAGCCATTG  
CCATTTGACAAAAGATGCAGGCAAGCTAATATGGGACAGCCGCTAGTCATCCTGGCCCCCATGCAGTAGAGGCACTG  
GTCAAGCAACCCCTGACCGCTGGCTATCCAATGCCCCGATGACCCACTACCAGGCAATGCTCCTAGACACTGACCGAGT  
TCAGTTTCGACCAAGTGGTGGCCCTCAATCCTGCCACCTTGCTCCCTCTACCGGAGAAAGGAGCCCCCATGATTGCCTCG  
AGATCTTGGCTGAAACGCATGGAACCAGACCGGACCTCACCGACCAGCCCATCCCAGACGCCGACCACACCTGGTATACC  
GATGGGAGCAGCTTTTTGCAAGAAGGACAGCGAAAAGCTGGGGCAGCAGTGACGACAGAGACCGAGGTAATCTGGGCGAG  
GGCCCTGCCAGCTGGAACGTGAGCCAGCGAGCCGAAGTATCGCACTCACCCAAGCCCTGAAAATGGCAGAAGGTAAAGA  
AGCTAAATGTTTATACTGACAGCCGATATGCTTTGCCACAGGCCCATGTCCATGGAGAAATCTATAGGAGGCGAGGGTTG  
CTGACCTCAGAGGGCAGAGAAATCAAAAACAAGAGCGAGATCCTGGCTTTACTGAAAGCTCTTTTTCTGCCTAAAAGACT  
CAGTATAATTCACTGCCCCGGGCATCAAAGGGAAACAGTGCTGAAGCCAGGGGCAACCGTATGGCAGACCAAGCGGCC  
GAGAGGCAGCCATAAGGACATCTCCAGAACTTCCACCCCTCCTCATAGAGGACTCGACCCCGTATACGCCCTCCCATTTC  
CACTACACTGAAACAGATCTAAAGAGATTACGAGAAGTGGGAGCCACCTATAATCAGATAAAAGGATATTGGGTCTTACA  
AGGCAAGCCGGTAATGCCCGATCAGTTTGTGTTTGAAGTATTAGACTCCTTACACAGGCTCACTCACCTCAGCCCTCAA

AGATGAAGGCACTCCTTGACAGAGAAGAAAGCCCCCTACTACATGTTAAACAGAGACAGAACTCTCCAGTATGTGGCAGAA  
TCATGCACAGCTTGTGCTCAAGTGAATGCTAGTAAAGCCAAGATCGGGGCAGGGGTACGAGTACGCGGACATCGACCAGG  
TACCCATTGGGAAATTGACTTTACTGAAGTTAAGCCAGGACTGTACGGGTACAAATACCTCCTAGTGTTCGTGGACACCT  
TCTCTGGCTGGGTAGAAGCCTTCCCACTAAACGTGAAACCGCCAAGGTGGTAACCAAGAAGCTATTAGAAGAAATATTC  
CCAAGATTGGGGATGCCACAGGTAAGTCTGCAATGGGCCTGCCTTCGTCTCCAGGTAAGTCAATTCGGTGGCCGA  
TTTACTGGGGATTGATTGGAAGTTACATTGTGCTTATAGACCCAGAGTTCAGGTACAGGTAGAGAGAATGAATAGAACCA  
TCAAGGAGACTTTAACCATAAATACGCTTGCAGCTGGCACTAGAGACTGGGTACTCCTACTCCCCCTGGCCCTCTACCGA  
GCCCCGAATACTCCGGGCCCCCATGGACTTACTCCGTATGAAATCCTGTATGGGGCACCCCCGCCCCCTCGTCAATTTTCA  
TGAGCCTGAAATGTCAAAGTTAACTAATAGTCCCTCTCTCCAAGCTCACTTACAGGCCCTCCAAGCAGTACAACGAGAGG  
TCTGGAAGCCACTGGCCGCTGCTTATCAGGACCAGCTGGATCAGCCAGTGATACACACCCCTTCCGTGTCCGTGACGCC  
GTGTGGGTACGCCGGCACCAGACTAAGAATTAGAACCCCGCTGGAAAGGACCCTACACCGTCTGTGACCAACCCAC  
CGCTCTCAAAGTAGACGGCATCTCCGCGTGGATACACGCGCTCACGTAAAGGCGGCGACAACCTCCTCAGCCGGAACAG  
CATGGAAGGTCCAGCGTTCTCAAACCCCTTAAAGATAAGATTAACCCGTGGGGCCCCCTAATAGTTATGGGGATCTTGG  
TGAGGGCAGGAGCCTCGGTACAACGTGACAGCCCTCACCAGATCTTCAATGTTACTTGGAGAGTTACCAACCTAATGACA  
GGACAAACAGCTAACGCCACCTCCCTCCTGGGGACGATGACAGACACCTTCCCTAAACTATATTTTGACCTGTGTGATTT  
AGTAGGAGACTACTGGGATGACCCAGAACCCGATATTGGGGATGGTTGCCGCACTCCCGGGGAAGAAGAAGGACAAGAC  
TGTATGACTTCTATGTTTGGCCCGGTCATACTGTACCAATAGGGTGTGGAGGGCCGGGAGAGGGCTACTGTGGCAATGG  
GGATGTGAGACCACTGGACAGGCATACTGGAAGCCATCATCATCATGGGACCTAATTTCCCTTAAAGCGAGGAAACACTCC  
TAAGGATCAGGGCCCCCTGTTATGATTCCCTCGGTCTCCAGTGGCGTCCAGGGTGCCACACCGGGGGGTGATGCAACCCCC  
TGGTCTTAGAATTCAGTGACGCGGGTAAAAGGCCAGCTGGGATGCCCCAAAGTTTGGGGACTGAGACTCTATCGATCC  
ACAGGGGGCCGACCCGGTGACCCGGTTCTCTTTGACCCGCCAGGTCTCAATGTAGGACCCCGCGTCCCCATTGGGCCTAA  
TCCCGTGATCACTGACCAGCTACCCCCATCCCAACCCGTGCAGATCATGCTCCCCAGGCCTCCTCATCTCTCTCTTCAG  
GCACGGTCTCTATGGTACCTGGGGCTCCCCCGCCTTCTCAACAACCTGGGACGGGAGACAGGCTGCTAAATCTGGTAGAA  
GGAGCCTACCAAGCACTCAACCTCACCAGTCCTGACAAAACCCAAGAGTGCTGGTTGTGTCTGGTATCGGGACCCCCCTA  
CTACGAAGGGGTTGCCGTCCTAGGTACCTACTCCAACCATACTCTGCCCCAGCTAACTGCTCCGTGGCCTCCCAACACA  
AGCTGACCCTGTCCGAAGTGACCGGACAGGGACTCTGCGTAGGAGCAGTTCCCAAAACCCATCAGGCCCTGTGTAATACC  
ACCCAGAAGCAGAGCAGCGGTCTTACTATCTGGCTGCTCCGCGGGACCATCTGGGCTTGCAACACCGGGCTCACTCC  
CTGCCTATCTACTACTGTACTCAACCTCACCACCGATTACTGTGTCTGGTTGAGCTCTGGCCAAAGGCTGACCTACCCT  
CCCCTGGTTATGTTTATGGCCAGTTTGAGAGAAAAACCAATATAGAAGGGAGCCGGTGTCACTAACTCTGGCCCTGCTG  
TTGGGAGGACTTACTATGGGCGGCATAGCTGCAGGAGTAGGAACAGGGACTACAGCCCTAGTGCCACCAAAACAATTCGA  
GCAGCTCCAGGCAGCCATACATACAGACCTTGGGGCCTTAGAAAAATCAGTCAGTGCCCTAGAAAAGTCTCTGACCTCGT  
TGTCTGAGGTGGTCTACAGAACCGGAGAGGATTAGATCTGCTGTTTCTTAAAGAAGGAGGATTATGTGCTGCCCTAAAA  
GAAGAATGCTGTTTCTACGCGGACCACACTGGCGTAGTAAGGGATAGCATGGCTAAGCTAAGAGAGAGACTAAACCAGAG  
ACAAAAATTGTTTGAATCAGGACAAGGGTGGTTTGGAGGACTGTTTAAACAGGTCCCATGGTTACAGACCTGATATCCA  
CCATTATGGGCCCTCTGATAGTACTTTTATTAATCCTACTCTTCGGACCCCTGTATTCTCAACCGCTTGGTCCAGTTTGT  
AAAGACAGAATTTTCGGTGGTGCAGGCCCTGGTTCTGACTCAACAGTATCACCAACTCAAATCAATAGATCCAGAAGCAGT  
GGAATCACGTGAATAAAAGATTTTATTAGTTTCCAGAAAGAGGGGGGAATGAAAGACCCACCATAGGCTTAGCAAGC  
TAGCTGCAGTAACGCCATTTTGAAGGCATGAAAAAGTACCAGAGCTGAGTTCTCAAAGTTACAAGGAAGTTAGTTAA  
AGATTAACAGTTAAAAATCAAGGCTGAATAATACTAGGACAAGGGCCAAGAACCGATGGTGCCACCTGGGCCCCGGCTC  
AAGGCCAAGAACCGGTGGTACCCACCTGGGCCCCGGCTCAGGGCCAAGAACAGATGGTACCCAGATAAGGCGGAACACAGC  
AACAGTTTCTGAAAAAGTCCCACCTCAGTTTTCAGGTTCCCAAAATGACCAGGAAATACCCCCAGCCTTGATTTGAACTAA  
CCACTCAGCTCGCTTCTCGCTTCTGTACCCGCGCTTTTGTCTCCCAGCCCTATAAAAAGGGTAAGAAGTCCACACTCGG  
CGCGCCAGTCCTCCGACAGACTGAGTCGCCCGGGTACCCGTGTTCCCAATAAAGCCTCATGCTGATTACATCCGAATCGT  
GGTCTCGCTGATCCTTGGGAGGGTCTCCTCAGATTGATTGACCACCCACCTCGGAGGTCTTTCA

>Xmv17

TGAAAGACCCACCATAGGCTTAGCAAGCTAGCTGCAGTAACGCCATTTTGAAGGCATGAAAAAGTACCAGAGCTGAG  
TTCTCAAAGTTACAAGGAAGTTAGTTAAAGATTAAACAGTTAAAAATCAAGGCTGAATAATACTAGGACAAGGGCCAAG  
AACCGATGGTACCCACCTGGGCCCCGGCTCAGGGCCAAGAACAGATGGTACCCAGATAAGGCGGAACAGCAACAGTTTC  
TGAAAAAGTCCCACCTCAGTTTTCAGGTTCCCCAAATGACCAGGAAATACCCCAAGCCTTGATTTGAACTAACCACTCAGC  
TCGCTTCTCGCTTCTGTACCCGCGCTTTTGTCTCCCAGCCCTATAAAAAGGGTAAAAACCCACACTCGGCGCGCCAGT  
CCTCCGATAGACTGAGTCGCCCCGGGTACCCGTGTTCCCAATAAAGCCTCTTGCTGATTACATCCGAATCGTGGTCTCGCT  
GATCCTTGGGAGGGTCTCCTCAGATTGATTGACTACCCACCTCGGGGGTCTTTTCAATTTGGAGGTTCCACCGAGATTAGGA  
GACCCCTGCCCAGGGACCAACGACCCCGCGGGAGGTAAGCTGGCCAGCGGTGTTTTCGTGTCTGTCTCTGTCTCCGTG  
CGTGTGTTGTGCCGGCATCTAATGTTTGCCTGCGTCTGTACTAGTTGGCTAACTAGATCTGTATCTGGCGGTTCCGTGG  
AAGAAGTACAGAGTTGTTATTTCCCGGCCGAGCCCTGGGAGACGTCCAGCGGCCTCGGGGGCCCGTTTTGTGGCCCAT  
CTGTATCAGTTAACTGCCCAGTTCGACTTTTTTGGAGCTCCTCCACTGTCCGAGGGGTACGTGGCTTTGTGGGGGAC  
GAGAGGCAGAGACACTTCCCTCCCCCGTCTGAATTTTTGCTTTTCGGTTTTACGCCGAAACCGCGCCGCGCTGTGATTTG

TTTGTGTGTTCTTTTGTTCCTCGTTAGTTTTCTCCTGTCTTTAAGTGTTTTTGAGATCATGGGACAGACCGTAACCTACCCC  
TCTGAGTCTAACCTTGCAGCACTGGGGAGATGTCCAGCGCATTGCATCCAATCAGTCTGTGGATGTCAGGAAGAGGCGCT  
GGGTTACCTTCTGTTCCGCCGAATGGCCAACCTTTCAATGTGGGATGGCCTCAGGATGGTACTTTTTAATTTAGGTATTATC  
TCTCAGGTCAAGTCTAGAGTGTTTTGTCTGGTCCCCACGGACACCCGGATCAGGTCCCATATATCGTCACCTGGGAGGC  
ACTTGCCTATGACCCCCCTCCGTGGGTCAAACCGTTTTGTCTCTCCAAAACCCCCCTCCTTTACCGACAGCTCCCGTCTCTC  
CGCCCCGTCTTCTGCGCAACCTCCGTCCCGATCTGCCCTTTACCCTGCCCTTACCCCCCTCTATAAAGCCCCAAACCTCCT  
AAGCCCCAGGTTCTCCCTGATAACGGCGGACCTCTCATTGACCTTCTCACAGAGGACCCCCCGCCGTACGGAGCACAACC  
TTCCTCCTCTGCCAGAGGGAACGATAAAGAAGAGGCGGCCACCACCTCCGAGGTTTTCCCCCCTTCTCCCATGGTGTCTC  
GACTGCGGGGAAGGAGAGACCCCTCCCGCAGCGGACTCCACCTCCTCCAGGCATTCCCACTCCGCATGGGGGGAGATGGC  
CAGCTTTCAGTACTGGCCGTTTTTCTCCTCGGACTTATATAATTGGAAAAATAATAACCCCTTCTTTTCTGAAGATCCAGG  
TAAATTGACGGCCTTGATTGAGTCCGTCTCATCACCACAGCCCACCTGGGACGACTGTGAGCAGTTGTTGGGGACCC  
TGCTGACCGGAGAAGAAAAGCAGCGGGTGCTCCTAGAGGCTAGAAAGGCAGTCCGGGGCAATGATGGACGCCCCACTCAG  
TTGCCTAATGAAGTCAATGCTGCTTTTTCCCTTGAACGCCCCGATTGGGATTACACCACTACAGAAGGTAGGAACCACCT  
AGTCTCTATCGCCAGTTGCTCTTAGCGGGTCTCCAAAACGCGGGCAGGAGCCCCACCAATTTGGCCAAGGTAAAAGGGA  
TAACCCAGGGACCTAATAAGTCTCCCTCAGCCTTTTTAGAGAGACTCAAGAAGGCCTATCGCAGGTACACTCCTTATGAC  
CCTGAGGACCCAGGGCAAGAAACCAATGTGTCTATGTCTATTGAGTCTGAGGAGTCTGCCCCGGATATCGGGCGAAAGTTAGA  
GCGGTTAAAAGATTTAAAGAGCAAGACCTTAGGAGACTTAGTGAGGGAAGCTGAAAGGATCTTTAATAAGCGAGAAACCC  
CGGAAGAAAGAGAGGAACGTATCAGGAGAGAAACAGAGGAAAAAGAAGAACGCCGTAGGGCAGAGGATGAGCAGAGAGAG  
AAAGAAAGGGACCGCAGAAGACATAGAGAGATGAGCAAGCTCTTGCCACTGTAGTTAATGGTCAGAGACAGGATAGACA  
GGGGGGAGAGCGGAGGAGGCCCACTTGATAAGGACCAATGCGCCTACTGCAAAGAAAAGGGACACTGGGCTAAGGACT  
GCCCCAAGAAGCCACGAGGGCCCCGAGGACCGAGGCCCCAGACCTCCTCCTGACCTTAGGTGACTAGGGAGGTGAGGGT  
CAGGAGCCCCCATGATTGCCTCGAGATCTTGGCTGAAACGCATGGAACCAGACCGGATCTCACCGACAGCCCATCCCA  
GACGCCGACCACACCCGGTATACCGATGGGAGCAGCTTTTTGCAAGAAGGACAGCGAAAGGCTGGGGCAGCAGTGACGAC  
TGAAACCGAGGTAATCTGGGCGAGGGCCCTGCCAGCTGGAACGTGAGCCAGCGAGCCGAACCTGATCGCACTCACCCAAG  
CCCTGAAAATGGCAGAAGGTAAGAAGCTAAATGTTTACACTGATAGCCGCTATGCCTTCGCTACGGCCCATGTTTCATGGG  
AAAATATATAGGAGACGGGGGTGCTGACCTCAGAAGGCAAGGAAATCAAGAACAAAAGCGAGATCCTAGCCTTGCTGAA  
AGCCCTCTTTTTGCCAAAGAGGCTCAGTATTATCCATTGCCCGGACACCAAAAAGGGAACAGTGTGAAGCCAGGGGCA  
ACCCATGGCCGATCAAGCGAGGACCCAGCCATGAGAGAGATCACAGAAACTTCCACGCTCTTAATAGAGGATTG  
TCCCCGTATACTCCCGATTACTTCCACTACACAGAGACTGACAGAAAAGACCTTCTGAGACTGGGAGCCGTATACGATGA  
GGACAAAAGGTATTGGGTCTGACGGGAAAACCTGTAATGCCTGACCAATTCACCTTTGAGCTCTTAGACTCCCTACACC  
GGCTCACCCACCTCAGCTATCAGAGGATGAAGGCACTCCTTGACCGGGAAGAGAGCCCCCTACTACATGTTAAATCGGGAT  
AGAACTCTCCAGCACGTAACAGAATCCTGTACAGCTTGTGCTCAAGTAAATGCTAGTAAAGCCAAAATCGGAGCAAGGGT  
GCGAGCGCGGGGACACCGACCCGGCACCCATTGAGAAATCGATTTTACCGAAGTTAAGCCAGGGCTGTATGGACATAAGT  
ATCTCCTGGTGTGTTGTGGACACATTCTCTGGCTGGGTAGAAGCATTTCACCAACGCGTAAACTGCCAGGGTTGTGACC  
AAGAAGCTGCTTGAAGAAATTTTTCCAAGATTGGGATGCCCCAGGTATTGGGGACAGATAATGGGCCTGCCTTCATCTC  
CCAGGTAAGTCAGTCGGTGGCCAAGTTGCTGGGGATTGATTGGAACCTGCATTGTGCTTACAGACCCAGAGTTTCAGGTC  
AGGTAAAAAAATGAACAGGACAATCAAGGAGACTTTAACCAAATTAACGCTTGCAGCTGGCACTAGAGACTGGGTACTC  
CTACTCCCCCTGGCCCTCTACCGAGCCCGGAATACTCCGGGCCCCCATGGAATTACTCCGTATGAAATTCTGTATGGGGC  
ACCCCCGCCCCCTTGTCATTTTTCATGATCCTGAAATGTCAAAGTTAACTAATAGTCCCTCTCTCCAAGCTCACTTACAGG  
CCCTCCAAGCAGTACAACGAGAGGTCTGGAAGCCACTGGCCGCTGCTTATCAGGACCAGCTGGATCAGCCAGTGATACCA  
CACCCCTTCCGCGTGGTGACGCCGTGTGGGTACGCCGGCACCAAGACTAAGAACTTAGAACCCCGCTGAAAAGGACCCCTA  
CACCGTCTGTGACACCCCCACCGCTCTCAAAGTAGACGGCATCTCTGCGTGGATACACGCCGCTCACGTAAAGGCGG  
CGACAACTCCTCCGGCCGGAACAGCATGGAAGGTCCAGCGTTCTCAAATCCCTTAAAGATAAGATTAACCCGTGGGGCC  
CCCTGATAGTTATGGGGATCTTAGTGAGGGCAGGAGCCTCGGTACAACGTGACAGCCCTCACCAGGTCTTCAATGTTACT  
TGGAGAGTTACCAACCTAATGACAGGACAAACAGCTAACGCCACCTCCCTCCTGGGGACGATGACAGACACCTTCCCTAA  
ACTATATTTTGACCTGTGTGATTTAGTAGGAACTACTGGGATTGGGATGACCCAGATGGAGATGGTTGCCGCTCTCCCG  
GGGGAAGAAAAAGGACAAGACTGTATGACTTCTATGTTTGCCCCGGTCATACTGTACCAATAGGGTGTGGAGGGCCGGGA  
GAGGGCTACTGTGGCAAATGGGGATGTGAGACCACTGGACAGGCATACTGGAAGCCATCATCATCATGGGACCTAATTTT  
CCTTAAGCGAGGAAACACTCCTAAGGATCAGGGCCCCCTGTTATGATTCTCGGTCTCCAGTGGCGTCCAGGGTGCCACAC  
CGGGGGGTGCGATGCAACCCCTAGTCTTAGAATTAAGTACGCGGGTAAAAAGGCCAGCTGGGATGCCCCCAAAGTTTGG  
GGACTAAGACTCTACCGATCCACAGGGGCCGACCCGGTGACCCGGTTCTCTTTGACCCGCCAGGTCTCAATGTAGGACC  
CCGCGTCCCCATTGGGCCTAATCCCGTGATCACTGACCAGCTACCCCCATCCCAACCCGTGCAGATCATGCTCCCCAGGC  
CTCCTCATCCTCCTCCTTCAGGCACGGTCTCTATGGTACCTGGGGCTCCCCCGCTTCTCAACAGCCTGGGACGGGAGAC  
AGGCTGCTAAATCTGGTAGACGGAGCCTACCAAGCACTCAACCTCACCAGTCTGACAAAACCCAAGAGTGCTGGTTGTG  
TCTGGTATCGGGACCCCCCTACTACGAAGGGGTTGCCGTCTAGGTACCTACTCCAACCATACTCTGCCCCAGCTAACT  
GCTCCGTGGCTTCCAAACACAAGCTGACCCTGTCCGAAGTGACCGGACAGGGACTCTGCGTAGGAGCAGTTCCCAAACCC  
CATCAGGCCCTGTGTAATACCACCCAGAAGACGAGCGACGGGTCTACTATCTGGCTGCTCCCGCCGGGACCATCTGGGC

TTGCAACACCGGGCTCACTCCCTGCTTATCTACTACTGTACTCAACCTCACCACCGATTACTGTGTCCTGGTTGAGCTCT  
GGCCAAAGGTGACCTACCACTCCCCTGGTTATGTTTATGGCCAGTTTGTAGAGAAAAACCAAATATATAAGAGAGCCGGTG  
TCATTAACCTCTGGCCCTGCTGTTGGGAGGACTTACTATGGGCGGCATAGCTGCAGGAGTAGGAACAGGGACTACAGCCCT  
AGTGGCCACCAAACAATTTCGAGCAGCTCCAGGCAGCCATACATACAGACCTTGGGGCCTTAGAAAAATCAGTCAGTGCCC  
TAGAAAAGTCTCTGACCTCGTTGTCTGAGGTGGTCTACAGAACC GGAGAGGATTAGATCTGCTGTTCTTAAAGAAGGA  
GGATTATGTGCTGCCCTAAAAGAAGAATGCTGTTTCTACGCGGACCACACTGGCGTAGTAAGAGATAGCATGGCAAAGCT  
AAGAGAAAGGTTAAACCAGAGACAAAAATTGTTTCAATCAGGACAAGGGTGGTTTGTAGGGACTGTTTAAACAGGTCCCAT  
GGTTCACGACCTTAATATCCACCATTATGGGCCCCCTTGATAATACTTTTATTAATCCTACTCCTCGGACCCTGTATTCTC  
AACCGCTTGGTCCAGTTTGTAAAAGACAGAATTTTCGGTGGTGCAGGCCCTGGTTCTGACCCAACAGTATCACCAACTCAA  
ATCAATAGATCCAGAAGAAGTGGAATCACGTGAATAAAAGATTTTATTTCAGTTTCCAGAAAGAGGGGGAATGAAAGACC  
CCACCATAAGGCTTAGCAAGCTAGCTGCAGTAACGCCATTTTGCAAGGCATGAAAAAGTACCAGAGCTGAGTTCTCAAAA  
GTTACAAGGAAGTTTCAGTTAAAGATTAACAGTTAAAAATCAAGGCTGAATAATACTAGGACAAGGGCCAAGAACCGATGG  
TACCCACCTGGGCCCCGGCTCAGGGCCAAGAACAGATGGTACCCAGATAAGGCGGAACCAGCAACAGTTTCTGAAAAAGT  
CCCACCTCAGTTTTCAGGTTCCCCAAATGACCAGGAAATACCCCAAGCCTTGATTGAACTAACCACCTCAGCTCGCTTCTC  
GCTTCTGTACCCGCGCTTTTTGTCTCCCCAGCCCTATAAAAAGGGTAAAAACCCACACTCGGCGCGCCAGTCTCCGATA  
GACTGAGTCGCCCCGGGTACCCGTGTTCCCAATAAAGCCTCTTGCTGATTACATCCGAATCGTGGTCTCGCTGATCCTTGG  
GAGGGTCTCCTCAGATTGATTGACTACCCACCTCGGGGTCTTTCA

>Xmv18

TGAAAGACCCCCACCATAAGGCTTAGCAAGCTAGCTGCAGTAACGCCATTTTGTCAAGGCATGAAAAAGTACCAGAGCTGAG  
TTCTCAAAAGTTACAAGGAAGTTTCAGTTAAAGATTAACAGTTAAAAATCAAGGCTGAATAATACTAGGACAAGGGCCAAG  
AACCGATGGTACCCACCGGGGGCCCCGGCTCAGGGCCAAGAACCGATGGTACCCACCTGGGCCCCGGCTCAGGGCCAAGAA  
CAGATGATACCCAGATAAGGCGGAACCAGCAACAGTTTCTGAAAAAGTCCCACCTCAGTTTTCAGGTTCCCCAAATGACCA  
GGAAATACCCCAAGCCTTGATTGAACTAACCACCTCAGCTCGCTTCTCGCTTCTGTACCCGCGCTTTTTGTCTCCCCAGCC  
CTATAAAAAGGGTAAAAACCCACACTCGGCGCGCCAGTCTCCGATAGACTGAGTCGCCCCGGGTACCCGTGTTCCCAAT  
AAAGCCTCTTGCTGATTACATCCGAATCGTGGTCTCGCTGATCCTTGGGAGGGTCTCCTCAGATTGATTGACTACCCACC  
TCGGGGGTCTTTCATTTGGAGGTTCCACCGAGATTAGGAGACCCCTGCCAGGGACCACCGACCCCGCGGGAGGTAAG  
CTGGCCAGCGGTGTTTTCGTGTCTGTCTCTGTCTCCGTGCGTGTTTTGTGCCGCGCATCTAATGTTTTGCGCCTGCGTCTGTA  
CTAGTTGGCTAAGTATCTGTATCTGGCGTTCCGTGGAAGAACTGACGAGTTCTGATTTCCGGCCGACGCCCTGGGAG  
ACGTCCCAGCGGCCTCGGGGGCCCCGTTTTGTGGCCCATCTGTATCAGTTAACCTGCCCGAGTCGGAATTTTTGGAGCTC  
CTCCACTGTCCGAGGGGTACGTGGCTTTGTGCGGGGACGAGAGGCAGAGACACTTCCCTCCCCCGTCTGAATTTTTGCTT  
TCGGTTTTTACGCCGAAACCGCGCGCGCGTCTGATTTGTTTGTGTTCTTTTTGTTCTTTCGTTAGTTTTCTCCTGTCTTTA  
AGTGTTTTTTGTAGATCATGGGACAGACCGTAACCTACCCCTCTGAGTCTAACCTTGCAGCACTGGGGAGATGTCCAGCGCAT  
TGCATCCAATCAGTCTGTGGATGTCAGGAAGAGGCGCTGGGTACCTTCTGTTCCGCCGAATGGCCAACCTTTCAATGTGG  
GATGGCCTCAGGATGGTACTTTTTAATTTAGGTATTATCTCTCAGGTCAAGTCTAGAGTGTTTTTGTCTGGTCCCCACGGA  
CACCCGGATCAGGTCCCATATATCGTCACCTGGGAGGCACCTTGCTATGACCCCCCTCCGTGGGTGAGACCGTTTTGTCTC  
TCCAAAACCCCCCTCTTTTACCAGACAGCTCCCGTCTCCCGCCCCGGTCTTCTGCGCAACCTCCGTCCCGATCTGCCCTTT  
ACCCTGCCCTTACCCCTCTATAAAGCCCCAACCTCCTAAGCCCCAGGTTCTCCCTGATAACGGCGGACCTCTCATTGAC  
CTTCTCACAGAGGACCCCCCGCCATACGGAGCACAACCTTCTCCTCTGCCAGAGGGAACGATGAAGAAGAGGCGGCCAC  
CACCCCGGAGGTTTTCCCCCCTTCTCCCATGGTGTCTCGACTGCGGGGAAGGAGAGACCTCCCCGAGCGGACTCCACCT  
CCTCCCAGGCATTCCCACTCCGCATGGGGGGAGATGGCCAGCTTTCAGTACTGGCCGTTTTTCTCCTCTGACTTATATAAT  
TGGAATAATAAACCTTCTTTTTCTGAAGACCCAGGTAAATTGACGGCCTTGATTGAGTCCGTCTCATCACCCACCA  
GCCACCTGGGACGACTGTGAGCAGTTGTTGGGGACCCTGCTGACCGGAGAAGAAAAGCAGCGGGTGCTCCTAGAGGCTA  
GAAAGGCAGTCCGGGGCAATGATGGACGCCCCACTCAGTTGCCTAATGAAGTCAATGCTGCTTTTCCCTTGAACGCCCC  
GATTGGGATTACACCACTACAGAAGGTAGGAACCACCTAGTCTCTATCGCCAGTTGCTCTTAGCGGGTCTCCAAAACGC  
GGCAGGAGCCCCACCAATTTGGCCAAGGTAAAAGGGATAAACCAGGGACCTAATGAGTCTCCCTCAGCCTTTTTAGAGA  
GACTCAAGGAGGCCTATCGCAGGTACACTCCTTATGACCCCTGAGGACCCAGGGCAAGAAACCAATGTGTCTATGTCAATC  
ATCTGGCAGTCTGCCCCGATATCGGGCGAAAGTTAGAGCGGTTAGAAGACTTAAAGAGCAAGACCTTAGGAGACTTAGT  
GAGGGAAGCTGAAAGGATCTTTAATAAGCGAGAAACCCCGGAAGAAAGAGAGGAACGTATCAGGAGAGAAACAGAGGAAA  
AAGAAGAACGCCGTAGGGCAGAGGATGAGCAGAGAGAGAAAGAAAGGGACCGCAGAAGACATAGAGAGATGAGCAAGCTC  
TTGGCCACTGTAGTTATTGGTCAGAGACAGGATAGACAGGGGGGAGAGCGGAGGAGGCCCAACTTGATAAGGACCAATG  
CGCCTACTGCAAAGAAAAGGGACACTGGGCTAAGGACTGCCCAAAGAAGCCACGAGGGCCCCGAGGACCGAGGCCCCAGA  
CCTCCCTCTGACCTTAGGTGACTAGGGAGGTGAGGGTACAGGAGCCCCCCCCCTGAACCCAGGATAACCTCAAAGTCGGG  
GGGCAACCCGTACCTTCTGGTAGATACTGGGGCCCAACACTCCGTGCTGACCCAAAATCCTGGACCCCTAAGTGACCA  
GTCTGCCTGGGTCCAAGGGGCTACTGGAGGAAAGCGGTATCGCTGGACCACGGATCGCAAAGTACATCTAGCTACCGGTA  
AGGTACCCACTCTTTCTCCATGTACCAGACTGCCCTATCCTCTGCTAGGAAGAGACTTGCTGACTAACTAAAAGCC  
CAGATCCACTTCGAGGGATCAGGAGCTCAGGTTGTGGGACCAATGGGACGGCCCCCTGCAAGTGCTGACCTAAACATAGA  
AGATGAGTATCGGCTACATGAGACCTCAAAGAGCCGGATGTTTCTCTAGGGTCCACATGGCTTTCTGATTTTCCCCAGG

CCTGGGCAGAAACCGGGGGCATGGGACTGGCAGTTTCGCCAAGCGCCTCTGATTATACCTCTAAAGGCAACCTCTACCCCC  
GTGTCCATAAAACAATACCCCATGTACAGGAAGCCAGACTGGGGATCAAGCCCCACATACAGAGGCTGTTGGACCAGGG  
AATACTGGTACCCTGCCAGTCCCCCTGGAACACGCCCCCTGCTACCCGTTAAGAAACCAGGGACTAATGATTACAGGCCTG  
TCCAGGATCTGAGAGAAGTCAACAAGCGGGTGAAGACATCCACCCCACCGTGCCCAACCTTTACAACCTCTTGAGCGGG  
CTCCCACCGTCCCACCAGTGGTACACTGTGCTTGATTTAAAGGATGCCTTTTTCTGCCTGAGACTCCACCCCACCAGTCA  
GCCTCTCTTCGCCTTTGAGTGGAGAGATCCAGGGATGGGAATCTCAGGACAATTGACCTGGACCAGACTCCCACAGGGTT  
TCAAAAACAGTCCCACCCTGTTTTGATGAGGCACTGCACAGAGACCTAGCAGACTTCCGGATCCAGCACCCAGACTTGATC  
CTGCTACAGTACGTGGATGACATACTACTGGCCGCCACTTCTGAGCTCGACTGCCAACAAGGTACTCGGGCCCTGTTACA  
AACCTTAGGAAACCTCGGGTATCGGGCCTCGGCCAAGAAAGCCCAACTTTGCCAGAAACAGGTCAAGTATCTGGGGTATC  
TTCTAAAAGAGGGTCAGAGATGGCTGACTGAGGCCAGAAAGAGACTGTGATGGGGCAGCCTACTCCGAAGACCCCTCGA  
CAACTAAGGGAGTTTCTAGGGACGGCAGGCTTCTGTGCCTCTGGATCCCTGGGTTTTCGGGAAATGGCAGCCCCCTTGTA  
TCCTCTTACCAAAACGGGGACTCTGTTTAATTGGGGCCCAGACCAGCAAAAGGCCTATCAAGAAATCAAACAGGCCCTTC  
TAACTGCCCCCGCCCTGGGATTGCCAGATTTGACTAAGCCCTTTGAACTCTTTGTGACGAGAGAAGCAGGGCTACGCCAAA  
GGCGTCTTAACGCAAAAACCTGGGACCTTGGCGTCGGCCTGTGGCCTACCTGTCCAAAAGCTAGACCCAGTGGCAGCTGG  
GTGGCCCCCTTGCCTACGGATGGTAGCAGCCATTGCCGTTCTGACAAAAGATGCAGGCAAGCTAACTATGGGACAGCCGC  
TAGTCATCCTGGCCCCCATGCAGTAGAGGCACTGGTCAAGCAACCCCTGACCGCTGGCTATCCAACGCCCGCATGACC  
CACTACCAGGCAATGCTCCTAGACACTGACCGAGTTTCACTTCGGACCACTGGTGGCCCTCAATCCTGCCACCTTGCTCCC  
TCTACCGGAAAAAGGAGCCCCCATGATTGCCTCGAGATCTTGCTGAAACGCATGGAACCAGACCGGATCTCACCAGACC  
AGCCCATCCCAGACGCCGACCACACCTGGTATACCGATGGGAGCAGCTTTTTGCAAGAAGGACAGCGAAAGGCTGGGGCA  
GCAGTGACGACTGAAACCGAGGTAATCTGGGCGAGGGCCCTGCCAGCTGGAACGTGAGCCAGCGAGCCGAAGTATCGC  
ACTCACCAAGCCCTGAAAATGGCAGAAGGTAAGAAGCTAAATGTTTACACTGATAGCCGCTATGCCTTCGCTACGGCCC  
ATGTTTCATGGGGAAATATATAGGAGACGGGGGTTGCTGACCTCAGAAGGCAAGGAAATCAAGAACAAAAGCGAGATCCTA  
GCCTTGCTGAAAGCCCTCTTTTTGCCAAAGAGGCTCAGTATTATCCATTGCCCGGGACACCAAAAAGGGAACAGTGCTGA  
AGCCAGGGGCAACCGAATGGCGGATCAAGCAGCCAGGGAGGCAGCCATGAGAGAGATCACAGAAACTTCCACGCTCTTAA  
TAGAGGATTTCGTCTCCGTATACTCCCAGTTACTTCCACTACACAGAGACTGACAGAAAAGACCTTCTGAGACTGGGAGCC  
GTATACGATGAGGACAAAAGGTATTGGGTCTGCAGGGAAAACCTGTAATGCCCTGACCAATTACCTTTGAGCTCTTAGA  
CTCCCTACACCGGCTCACCCACTCAGCTATCAGAAGATGAAGGCACTCCTTGACCGGGAAGAGAGCCCCCTACTACATGT  
TAAATCGGGATGAAACTCTCCAGCACGTAACAGAATCCTGTACAGCTTGTGCTCAAGTAAATGCTAGTAAGACCAAAATC  
GGAGCAAGGGTGCGAGCGCGGGGACACCGACCCGGCACCCATTGGGAAATCGATTTTACCGAAGTTAAGCCAGGGCTGTA  
TGGACATAAGTATCTCCTGGTGTTTTGTGGACACATTCTCTGGCTGGGTAGAAGCATTTCGAACCAAGCGTGAAACTGCCA  
GGGTTGTGACCAAGAAGCTGCTTGAAGAAATTTTTTCCAAGATTTCGGGATGCCCCAGGTATTGGGGACAGATAATGGGCCT  
GCCTTCATCTCCCAGGTAAGTCAGTCGGTGGCCAAGTTGCTGGGGATTGATTGGAAACTGCATTGTGCTTACAGACCCCCA  
GAGTTTCAGGTGAGGTAGAAAGAATGAACAGGACAATCAAGGAGACTTTAACCATAATTAACGCTTGACAGCTGGCACTAGAG  
ACTGGGTACTCCTACTCCCCCTGGCCCTCTACCGAGCCCGGAATACTCCGGGCCCCCATGGACTTACTCCGTATGAAATT  
CTGTATGGGGCACCCCCGCCCTTGTCAATTTTTCATGATCCTGAAATGTCAAAGTTAACTAATAGTCCCTCTCTCCAAGC  
TCACTTACAGGCCCTCCAAGCAGTACAACGAGAGGTCTGGAAGCCACTGGCCGCTGCTTATCAGGACCAGCTGGATCAGC  
CAGTGATACCACACCCCTTCCGCGTCGGTGACGCCGTGTGGGTACGCCGGCACCCAGACTAAGAAGTTAGAACCCCGCTGG  
AAAGGACCCTACACCGTCCTGCTGACCACCCCCACCGCTCTCAAAGTAGACGGCATCTCTGCGTGGATACACGCCGCTCA  
CGTAAAGGCGGCGACAACCTCCTCCGGCCGGAACAGCATGGAAGGTCCAGCGTTCTCAAATCCCTTAAAGATAAGATTAA  
CCCGTGGGGCCCCCTGATAGTTATGGGGATCTTAGTGAGGGCAGGAGCCTCGGTACAACGTGACAGCCCTCACCAGGTCT  
TCAATGTTACTTGGAGAGTTACCAACCTAATGACAGGACAAACAGCTAACGCCACCTCCCTCCTGGGGACGATGACAGAC  
ACCTTCCCTAAACTATATTTTGATCTGTGTGATTTAGTAGGAGACTACTGGGATGACCCAGATGGAGATGGTTGCCGCTC  
TCCCGGGGGAAGAAAAAGGACAAGACTGTATGACTTCTATGTTTGGCCCGGTCATACTGTACCAATAGGGTGTGGAGGGC  
CGGGAGAGGGCTACTGTGGCAAATGGGGATGTGAGACCACTGGACAGGCATACTGGAAGCCATCATCATCATGGGACCTA  
ATTTCCCTTAAGCGAGGAAACACTCCTAAGGATCAGGGCCCCCTGTTATGATTCTCGGTCTCCAGTGGCGTCCAGGGTGC  
CACACCGGGGGTTCGATGCAACCCCTAGTCTTAGAATTCACTGACGCGGGTAAAAAGGCCAGCTGGGATGCCCCCAAAG  
TTTGGGGACTAAGACTCTACCGATCCACAGGGGCCGACCCGGTGACCCGGTTCTCTTTGACCCGCCAGGTCTCTCAATGTA  
GGACCCCGCGTCCCCATTGGGCCTAATCCCGTGATCACTGACCAGCTACCCCCATCCCAACCCGTGCAGATCATGCTCCC  
CAGGCCTCCTCATCTCCTTCAGGCACGGTCTCTATGGTACCTGGGGCTCCCCCGCCTTCTCAACAGCCTGGGACGGGAG  
ACAGGCTGCTAAATCTAGTAGACGGAGCCTACCAAGCACTCAACCTCACCAGTCTTGACAAAACCCAAGAGTGCTGGTTG  
TGTCTGGTATCGGGACCCCCCTACTACGAAGGGGTTGCCGTCCTAGGTACCTACTCCAACCATACTCTGCCCCAGCTAA  
CTGCTCCGTGGCCTCCCAACACAAGCTGACCCTGTCCGAAGTGACCGGACAGGGACTCTGCGTAGGAGCAGTTCCCAAAA  
CCCATCAGGCCCTGTGTAATACCACCCAGAAGACGAGCGACGGGTCTACTATCTGGCTGCTCCCGCCGGGACCATCTGG  
GCTTGCAACACCGGGCTCACTCCCTGCCTATCTACTACTGTACTCAACCTCACCACCGATTACTGTGTCTCTGGTTGAGCT  
CTGGCCAAAGGTGACCTACCACTCCCCTGGTTATGTTTATGGCCAGTTTGAGAGAAAAACCAATATATAAGAGAGCCGG  
TGTCATTAACTCTGGCCCTGCTGTTGGGAGGACTTACTATGGGCGGCATAGCTGCAGGAGTAGGAACAGGGACTACAGCC  
CTAGTGGCCACCAACAATTTCGAGCAGCTCCAGGCAGCCATACATACAGACCTTGGGGCCTTAGAAAAATCAGTCAGTGC

CCTAGAAAAGTCTCTGACCTCGTTGTCTGAGGTGGTCCTACAGAACCGGAGAGGATTAGATCTGCTGTTCTCTAAAAGAAG  
GAGGATTATGTGCTGCCCTAAAAGAAGAATGCTGTTTTCTACGCGGACCACACTGGCGTAGTGAGAGATAGCATGGCAAAG  
CTAAGAGAAAAGGTTAAACCAGAGACAAAATTGTTTGAATCAGGACAAGGGTGGTTTTGAGGGACTGTTTAAACAGGTCCCC  
ATGGTTTACGACCTTGATATCCACCATTATGGGCCCCCTTGATAATACTTTTTATTAATCCTACTCCTCGGACCCTGTATTC  
TCAACCGCTTGGTCCAGTTTGTAAAAGACAGAATTTCCGTGGTGCAGGCCCTGGTTCTGACCCAACAGTATCACCAACTC  
AAATCAATAGATCCAGAAGAAGTGAATCACGTGAATAAAAGATTTTTATTTCAGTTTCCAGAAAGAGGGGGGAATGAAAGA  
CCCCACCATAAGGCTTAGCAAGCTAGCTGCAGTAACGCCATTTTGCAAGGCATGAAAAAGTACCAGAGCTGAGTTCTCAA  
AAGTTACAAGGAAGTTCAGTTAAAGATTAACAGTTAAAAATCAAGGCTGAATAATACTAGGACAAGGGCCAAGAACCGAT  
GGTACCCACCGGGCCCCGGCTCAGGGCCAAGAACCGATGGTACCCACCTGGGCCCCGGCTCAGGGCCAAGAACAGATGA  
TACCCAGATAAAGCGGAACCCAGCAACAGTTTCTGAAAAAGTCCCACCTCAGTTTTCAGGTTCCCCAAATGACCAAGAAATA  
CCCCAAGCCTTGATTTGAACTAACCACTCAGCTCGTTTCTCGCTTCTGTACCCGCGCTTTTTGTCTCCCCAGCCCTATAAA  
AAGGGTAAAAACCCACACTCGGCGCGCCAGTCTCCGATAGACTGAGTCGCCCCGGGTACCCGTGTTCCCAATAAAGCCT  
CTTGCTGATTACATCCGAATCGTGGTCTCGCTGATCCTTGGGAGGGTCTCCTCAGATTGATTGACTACCCACCTCGGGGG  
TCTTTCA

>Xmv19

TTGAAAGACCCACCATAAGGCTTAGCAAGCTAGCTGCAGTAACGCCATTTTGCAAGGCATGAAAAAGTACCAGAGCTGA  
GTTCTCAAAGTTACAAGGAAGTTCAGTTAAAGATTAACAGTTAAAAATCAAGGCTGAATAATACTAGGACAAGGGCCAA  
GAACCGATGGTGCCACCTGGGCCCCGGCTCAAGGCCAAGAACCGATGGTACCCACCTGGGCCCCGGCTCAGGGCCAAGA  
ACAGATGGTACCCAGATAAGGCGGAACCCAGCAACAGTTTCTGAAAAAGTCCCACCTCAGTTTTCAGGTTCCCCAAATGACC  
AGGAAATACCCCAAGCCTTGATTTGAACTAACCACTCAGCTCGTTTCTCGCTTCTGTACCCGCGCTTTTTGTCTCCCCAGC  
CCTATAAAAAGGGTAAAAACCCACACTCGGCGCGCCAGTCTCCGATAGACTGAGTCGCCCCGGGTACCCGTGTTCCCAA  
TAAAGCCTCTTGCTGATTACATCCGAATCGTGGTCTCGCTGATCCTTGGGAGGGTCTCCTCAGATTGATTGACTACCCAC  
CTCGGGGGTCTTTTCATTTGGAGGTTCCACCGAGATTAGGAGACCCCTGCCAGGGACCACCGACCCCCCGCGTACGGAGC  
ACAACCTTCTCCTCTGCCAGAGGGAACGATGAAGAAGAGGCGGCCACCACCTCCGAGGTTTCCCCCCTTCTCCCATGG  
TGTCTCGACTGCGGGGAAGGAGAGACCCTCCCGCAGCGGACTCCACCTCCTCCCAGGCATTCCCACTCCGCATGGGGGA  
GATGGCCAGCTTCAGTATTGGCCGTTTTCTCCTCAGACTTATATAATTGAAAAATAATAACCTTCTCTTTTCTGAAGA  
CCCAGGTAAATTGACGGCCTTGATTGAGTCCGTCTCATCACCCACGAGCCACCTGGGACGACTGTGACAGATTGTTGG  
GGACCTGCTGACCGGAGAAGAACGAGCGGGTGCTCTTAGAGGCTAGAAAGGCGAGTCGCGGGGCAATGATGGAGCCCC  
ACTCAGTTGCCTAATGAAGTCAATGCTGCCTTTCCCTTGAAGCCCCGATTGGGATTACACCACTACAGAAGGTAGGAA  
CCACCTAGTCCTCTATCGCCAGTTGCTCTTAGCGGGTCTCCAAAACGCGGGCAGGAGCCCCACCAATTTGGCCAAGGTAA  
AAGGGATAACCCAGGGACCTAATGAGTCTCCCTCAGCCTTTTTAGAGAGACTCAAGGAGGCCTATCGCAGGTACACTCCT  
TATGACCCTGAGGACCCAGGGCAAGAAACCAATGTGTCTATGTCAATTCATCTGGCAGTCTGCCCGGATATCGGGCGAAA  
GTTAGAGCGGTTAGAAGATTTAAAGAGCAAGACCTTAGGAGACTTAGTGAGGGAAGCTGAAAGGATCTTTAATAAGCGAG  
AAACCCCGGAAGAGAGAGAGGAACGTATCAGGAGAGAAACAGAGGAAAAAGAAGAACGCCGTAGGGCAGAGGATGAGCAG  
AGAGAGAAAGAAAGGGACCGCAGAAGACATAGAGAGATGAGCAAGCTCTTGCCACTGTAGTTATTGGTCAGAGGCAGGA  
TAGACAGGGGGGAGAGCGGAGGAGGCCCAACTTGATAAGGACCAATGCGCCTACTGCAAAGAAAAGGGACACTGGGCTA  
AGGACTGCCCAAAGAAGCCACGAGGGCCCCGAGGACCGAGGCCCCAGACCTCCCTCCTGACCTTAGGTGACTAGGGAGGT  
CAGGGTCAGGAGCCCCCCCCCTGAACCCAGGATAACCTCAAAGTCGGGGGGCAACCCGTACCTTCTGGTAGATACTGG  
GGCCCAACACTCCGTGCTGACCCAAAATCCTGGACCCCTAAGTGACAAGTCTGCCTGGGTCCAAGGGGCTACTGGAGGAA  
AGCGGTACCGCTGGACCACGGATCGCAAAGTACATCTAGCTACCGGTAAGGTACCCACTCTTTCTCCATGTACCAGAC  
TGCCCCCTATCCTCTGCTAGGAAGAGACTTGCTGACTAAACTAAAAGCCCAGATCCACTTCGAGGGATCAGGAGCTCAGGT  
TGTGGGACCAATGGGGCAGCCCCCTGCACGTGCTGACCCTAAACATAGAAGATGAGTATCGGCTACATGAGACCTCAAAG  
AGCCGGATGTTTCTCTAGGGTCAACATGGCTTTCTGATTTTCCCCAGGCCTGGGCAGAAACCGGGGCATGGGACTGGCA  
GTTTCGCCAAGCGCCTCTGATTATACCTCTAAAGGCAACCTCTACCCCCGTGTCCATAAAACAATACCCCATGTACAGGA  
AGCCAGACTGGGGATCAAGCCCCACATACAGAGGCTGTTGGACCAGGGAATACTGATACCCTGCCAGTCCCCCTGGAACA  
CGCCCCCTGTACCCGTTAAGAAACCAGGGACTAATGATTACAGGCCTGTCCAGGATCTGAGAGAAGTCAACAAGCGGGTG  
GAAGACATCCACCCACCGTGCCCAACCTTACAACCTCTTGAGCGGGCTCCACCGTCCCACCAAGTGGTACACTGTGCT  
TGATTTAAAGGATGCCTTTTTCTGCCTGAGACTCCACCCACCAGTCAGCCTCTCTTCGCCTTTGAGTGGAGAGATCCAG  
AGATGGGAATCTCAGGACAATTGACCTGGACCAGACTCCACAGGGTTTTCAAAAACAGTCCCACCCTGTTTGATGAGGCA  
CTACACAGAGACCTAGCAGACTTCCGGATCCAGCACCCAGACTTGATCCTGCTACAGTACGTGGATGACATACTACTGGC  
CGCCACTTCTGAGCTCAACTGCCAACAAGGTAAGTCTCGGGCCCTGTTACAAACCTTAGGAAACCTCGGGTATCGGGCCTCGG  
CCAAGAAAGCCCAACTTTGCCAGAAACAGGTCAAGTATCTGGGGTATCTTCTGAAAGAGGGTCAGAGATGGCTGACTGAG  
GCCAGAAAAGAGACTGTGATGGGGCAGCCTACTCCGAAGACCCCTCGACAACCTAAGGGAGTTCTTAGGGACGGCAGGCTT  
CTGTGCCTCTGGATCCCTGGGTTTTCGGGAAATGGCAGCCCCCTTGATCCTCTTACCAAACGGGGACTCTGTTTAATT  
GGGGCCCAGACCAGCAAAAGGCCTATCAAGAAATCAAACAGGCCCTTCTAACTGCCCCCGCCCTGGGATTGCCAGATTTG  
ACTAAGCCCTTTGAACTCTTTGTGACGAGAAGCAGGGCTACGCCAAAGGCGTCCTAACGCAAAAACCTGGGACCTTGGCG  
TCGGCCTGTGGCCTACCTGTCCAAAAGCTAGACCCAGTGGCAGCTGGGTGGCCCCCTTGCTACGGATGGTAGCAGCCA

TTGCCGTTCTGACAAAAGATGCAGGCAAGCTAACTATGGGACAGCCGCTAGTCATCCTGGCCCCCATGCAGTAGAGGCA  
CTGGTCAAGCAACCCCTGACCGCTGGCTATCCAACGCCCCGATGACCCACTACCAGGCAATGCTCCTAGACACTGACCG  
AGTTTCAGTTTCGGACCAGTGGTGGCCCTCAATCCTGCCACCTTGCTCCCTCTACCGGAAAAAGGAGCCCCCATGATTGCC  
TCGAGATCTTGGCTGAAACGCATGGAACAGACCGGATCTCACCAGCAGCCCATCCCAGACGCCGACCACACCTGGTAT  
ACCGATGGGAGCAGCTTTTTGCAAGAAGGACAGCGAAAGGCTGGGGCAGCAGTGACGACTGAAACCGAGGTAATCTGGGC  
GAGGGCCCTGCCAGCTGGAACGTGAGCCAGCGAGCCGAAGTATCGCACTCACCCAAGCCCTGAAAATGGCAGAAGGTA  
AGAAGCTAAATGTTTACACTGATAGCCGCTATGCCTTCGCTACGGCCCATGTTTCATGGGGAAATATATAGGAGACGGGG  
TTGCTGACCTCAGAAGGCAAGGAAATCAAGAACAAAAGCGAGATCCTAGCCTTGCTGAAAGCCCTCTTTTTGCCAAAGAG  
GCTCAGTATTATCCATTGCCCGGGACACCAAAAAGGGAACAGTGCTGAAGCCAGGGGCAACCGAATGGCGGATCAAGCAG  
CCAGGGAGGCAGCCATGAGAGGGATCACAGAAACTTCCACGCTCTTAATAGAGGATTTCGTCCCGTATACTCCCAGTTAC  
TTCCACTACACAGAGACTGACAGAAAAGACCTTCTGAGACTGGGAGCCGTATACGATGAGGACAAAAGGTATTGGGTCT  
GCAGGGAAAACCTGTAATGCCTGACCAATTCACCTTTGAGCTCTTAGACTCCCTACACCGGCTCACCCACCTCAGCTATC  
AGAAGATGAAGGCACTCCTTGACCGGAAGAGAGCCCTACTACATGTTAAATCGGGATAGAACTCTCCAGCACGTAACA  
GAATCCTGTACAGCTTGTGCTCAAGTAAATGCTAGTAAAGCCAAAATCGGAGCAAGGGTGCGAGCGCGGGGACACCGACC  
CGGCACCCATTGGGAAATCGATTTTACCAGAGTTAAGCCAGGGCTGTATGGACATAAGTATCTCCTGGTGTGTGTGGACA  
CATTCTCTGGCTGGGTAGAAGCATTTCCAACCAAGCGTGAAACTGCCAGGGTTGTGACCAAGAAGCTGCTTGAAGAAATT  
TTTCCAAGATTTCGGGATGCCCCAGGTATTGGGGACAGATAATGGGCCTGCCTTCATCTCCCAGGTAAGTCAGTCGGTGGC  
CAAGTTGCTGGGGATTGATTGGAAACTGCATTGTGCTTACAGACCCCAGAGTTTCAGGTCAGGTAGAAAGAATGAACAGGA  
CAATCAAGGAGACTTTAACCAAATTAACGCTTGCGACTGAGACTGGGTACTCCTACTCCCCCTGGCCCTCTAC  
CGAGCCCGGAATACTCCGGGCCCCCATGGACTTACTCCGTATGAAATTCTGTATGGGGCACCCCGCCCCCTTGTCAATTT  
TCATGATCCTGAAATGTCAAAGTTAACTAATAGTCCCTCTCTCCAAGCTCACTTACAGGCCCTCCAAGCAGTACAACGAG  
AGGTCTGGAAGCCACTGGCCGCTGCTTATCAGGACCAGCTGGATCAGCCAGTGATACCACACCCCTTCCGCGTCGGTGAC  
GCCGTGTGGGTACGCCGACACCAGACTAAGAACTTAGAACCCCGCTGGAAAGGACCCTACACCGTCTCTGCTGACCACCC  
CACCGCTCTCAAAGTAGACGGCATCTCTGCGTGGATACACGCCGCTCACGTAAAGGCGGCGACAACCTCCTCCGGCCGGAA  
CAGCATGGAAGGTCCAGCGTTCTCAAAATCCCTTAAAGATAAGATTAAACCCGTGGGGCCCCCTGATAGTTATGGGGATCT  
TAGTGAGGGCAGGAGCCTCGGTACAACGTGACAGCCCTCACCAGGTCTTCAATGTTACTTGGAGAGTTACCAACCTAATG  
ACAGGACAAAACACTAACGCCACCTCCCTCCTGGGACAGTACAGACACCTTCCCTAAACTATATTTTGACCTGTGTGA  
TTTAGTAGAGACTACTGGGATTGGGATGACCCAGATGGAGATGGTTGCCGCTCTCCCGGGGGAAGAAAAGGACAAGAG  
TGTATGACTTCTATGTTTGGCCCGGTACATACTGTACCAATAGGGTGTGGAGGGCCGGGAGAGGGCTACTGTGGCAAATGG  
GGATGTGAGACCCTGGACAGGCATACTGGAAGCCATCATCATCATGGGACCTAATTTCCCTTAAAGCGAGGAAACACTCC  
TAAGGATCAGGGCCCCCTGTTATGATTCTCGGTCTCCAGTGCGCTCCAGGGTGCCACACCGGGGGGTGATGCAACCCCC  
TAGTCTTAGAATTCAGTGACGCGGGTAAAAAGGCCAGCTGGGATGCCCCCAAAGTTTGGGGACTAAGACTCTACCGATCC  
ACAGGGGCGGACCCGGTGACCCGGTTCTCTTTGACCCGCCAGGTCTCAATGTAGGACCCCGCGTCCCCATTGGGCCTAA  
TCCCGTGATCACTGACCAGCTACCCCCATCCCAACCCGTGCAGATCATGCTCCCCAGGCCTCCTCATCTCTCTCTTCAG  
GCACGGTCTCTATGGTACCTGGGGCTCCCCCGCCTTCTCAACAGCCTGGGACGGGAGACAGGCTGCTAAATCTGGTAGAC  
GGAGCCTACCAAGCACTCAACCTCACCAGTCTTGACAAAACCAAGAGTGCTGGTTGTGTCTGGTATCGGGACCCCCCTA  
CTACGAAGGGGTTGCCGTCTAGGTACCTACTCCAACCATACTCTGCCCCAGCTAACTGCTCCGTGGCCTCCCAACACA  
AGCTGACCCTGTCCGAAGTGACCGGACAGGGACTCTGCGTAGGAGCAGTTCCCAAAACCCATCAGGCCCTGTGTAATACC  
ACCCAGAAGACGAGCGACGGGTCTACTATCTGGCTGCTCCCGCCGGGACCATCTGGGCTTGCAACACCGGGCTCACTCC  
CTGCCTATCTACTACTGTACTCAACCTCACCACCGATTACTGTGTCTCTGGTTGAGCTCTGGCCAAAGGTGACCTACCACT  
CCCCTGGTTATGTTTATGGCCAGTTTGAGAGAAAAACCAATATAAAAGAGAGCCGGTGTCAATTAACCTCTGGCCCTGCTG  
TTGGGAGGACTTACTATGGGCGGCATAGCTGCAGGAGTAGGAACAGGGACTACAGCCCTAGTGGCCACCAACAATTCGA  
GCAGCTCCAGGCAGCCATACATACAGACCTTGGGGCCTTAGAAAAATCAGTCAGTGCCCTAGAAAAGTCTCTGACCTCGT  
TGTCTGAGGTGGTCTACAGAACCGGAGAGGATTAGATCTGCTGTTCTTAAAGAAGGAGGATTATGTGCTGCCCTAAAA  
GAAGAATGCTGTTTCTACGCGGACCACACTGGCGTAGTGAGAGATAGCATGGCAAAGCTAAGAGAAAGGTTAAACCAGAG  
ACAAAAATTGTTTGAATCAGGACAAGGGTGGTTTGAGGGACTGTTTAAACAGGTCCCCATGGTTTACGACCTTGATATCCA  
CCATTATGGGCCCCCTTGATAATACTTTTATTAATCCTACTCCTCGGACCCTGTATTCTCAACCGCTTGGTCCAGTTTGTA  
AAAGACAGAATTTCCGGTGGTGCAGGCCCTGGTTCTGACCCAACAGTATCACCAACTCAAATCAATAGATCCAGAAGAAGT  
GGAGTCACGTGAATAAAAGATTTTATTTCAGTTTCCAGAAAGAGGGGGGAATGAAAGACCCCAACATAAGGCTTAGCAAGC  
TAGCTGCAGTAACGCCATTTTGCAAGGCATGAAAAAGTACCAGAGCTGAGTTCTCAAAAGTTACAAGGAAGTTTCAGTTAA  
AGATTAACAGTTAAAAATCAAGGCTGAGTAATACTAGGACAAGGGCCAAGAACCGATGGTGCCACCTGGGCCCCGGCTC  
AAGGCCAAGAACCGATGGTACCCACCTGGGCCCCGGCTCAGGGCCAAGAACAGATGGTACCCAGATAAGGCGGAACACAGC  
AACAGTTTCTGAAAAAGTCCCACCTCAGTTTTCAGGTTCCCAAAATGACCAGGAAATACCCCAAGCCTTGATTTGAACTAA  
CCACTCAGCTCGCTTCTCGCTTCTGTACCCGCGCTTTTTGCTCCCCAGCCCTATAAAAAGGGTAAAAACCCCACTCGG  
CGCGCCAGTCTCCGATAGACTGAGTCGCCCCGGGTACCCGTGTTCCCAATAAAGCCTCTTGCTGATTACATCCGAATCGT  
GGTCTCGCTGATCCTTGGGAGGGTCTCCTCAGATTGATTGACTACCCACCTCGGGGTCTTTCA

>Xmv41

TGAAAGACCCCACCATAAGGCTTAGCAAGCTAGCTGCAGTAACGCCATTTTTGCAAGGCATGAAAAAGTACCAGAGCTGAG  
TTCTCAAAAGCCACAAGAAAGTTTAGTTAAAAAATAAGGCTGAACAAAAGTACGAGAGGGGCCAAACAGGATATCTGTGG  
TCGAGCACCTGGGCCCCGGCTCAGGGCCAAAAACAGATGGTACTCAGATAAAGCGAAAGTACGAAACAGTTTCTGGAAAGT  
CCCACCTCAGTTTCAAGTTCCCCAAAAGACCGAGAAAAACCCCAAGCCTTATTTAAACTAACCAATCAGCTCGCTTCTCG  
CTTCTGTAACCGCGCTTTTTGCCCCCAGCCCAAGCCCTATAAAAAGGGTAAAAACTCCACACTCGGCGCGCCAGTCATC  
CGATAGACTGAGTCGCCCCGGGTACCCGTGTTCCCAATAAAGCCTTTTGCCGTTTGTCATCCGAGTCGTGGTCTCGCTGTTT  
CTTGGGAGGGTCTCCTCAGAGTAATTGACTACCCAGCTCGGGGGTCTTTTCAATTTGGGGGCTCGTCCGGGATCCGGAGACC  
CCCGCCCAGGGACCACCGACCCACCGTCGGGAGGTAAGCTGGCCAGCGATCGTTTTGTCTCCGTCTCTGTCTTTGTGCGT  
GTGTGTGTGCCGGCATCTAATCTTTGCGCCTGCGTCTGTATCTGTACTAGTTAGCTAACTAGATCTGTATCTGGCGGTTT  
CGTGGGAAGAACTGATGAGTTCGTATTCCCGACCGCAGCCCTGGGAGACGTCTCAGAGGCATCAGGGGCCCGCTGGGTGGC  
CCAATCAGTAAGTCCGAGTCTGATCGATTTCGGGCTATTTGGAGCCCCCTCCTTTGTCTCGGAGGGGTACGTGGTTCTTTT  
GAGACGAGAGGTCCAAGCCCTCGCCGCTCCATCTGAATTTTTGCTTTTGGTTTTTTCGCCGAAACCGCGCCGCGCTCTT  
GTCTGTCTCAGTGTTGTTCTGTCTATTGTTGTTGTTTTGGACCGTTTTCTAAAAATATGGGACAGACTGTAAC  
CACTCCTTTGAGCCTGACCTTGAACACTGGGGAGACGTCCAGCGCATTGCGTCCAACCAAGTCCGTGGACGTCAAGAAGA  
GACGCTGGGTACCTTCTGCTCTGCCGAGTGGCCAACCTTTCGATGTGGGGTGGCCACAAGATGGTACTTTTAATTTAGAC  
ATCATTTTACAGGTTAAATCTAAGGTGTTCTCTCCCGTCCCCACGGACACCCGGATCAGGTCCCATACATTGTCACCTG  
GGAGGCTATTGCCTATGACCCCCCTCCGTGGGTCAAACCTTTTGTCTCTCCCAAACCTCTCTCTCTCTCCAAACCGCTCCCA  
TCCTCCCATCCGGCCCTTCGACCCAACTCCGCCCGATCTGCCCTTTACCCTGCTCTTACCCCTCTATAAAACCCAGA  
CCTTCTAAACCTCAGGTTCTCTCCGATAACGGCGGACCTCTCATTGACCTTCTCACAGAAGACCCTCCGCCGTACGGAGA  
ACAGGGACCGTCTCTCTGACGGAGATGGCGACAGAGAAGAGGCCACCTCCACTTCTGAGATTCTGCCCCCTCTCCCA  
TGGTGTCTCGCCTGCGGGGCAAAAGAGACCCCCCGCGGCAGATTCCACCACCTCTCGGGCTTTCCCACTCCGTTTGGGG  
GGTAATGGTCAGTTGCAGTACTGGCCGTTTTCTCCTCTGATCTATATAACTGGAAAAATAATAATCCTTCTCTTTCTGA  
AGATCCAGGTAAATTGACTGCCTTAATCGAGTCTGTTCTCATCACCCATCAGCCTACCTGGGATGACTGTCAGCAGTTGC  
TGGGGACTCTGCTGACAGGAGAGGAGAAGCAGCGGGTGTCTTGGAGGCTAGAAAGGCAGTCCGGGGCGACGACGGGCGC  
CCCACCCAGTTGCCCAACGAGATCGAGGCGCCTTTCCCCTCGAACGTCCGACTGGGACTATACCACCCCTGGAGGTAG  
GAACCACCTAGTTCTCTATCGCCAGCTGCTCTTAGCGGGTCTCCAGAATGCGGGCCGGAGCCCCACCAATTTGGCCAAGG  
TAAAAGGGATAACTCAGGAGCCCAATGAGTCTCCCTCGGCCTTTTATAGAGAGACTCAAAGAGGCCCTATCGCAGGTACACT  
CCTTATGACCCTGAGGACCTGGGCAAGAAACCAATGATATCCATGTCTGTTTATCTGGCAGTCCGCTCCGACATTGACTCG  
GAAGTTAGAGCGGTTAGAAGACTTAAAAAGCAAAACCTTAGGGGACTTAGTGAGAGAAGCCGAGAGGATCTTTAATAAAC  
GAGAAACCCCGAAGAAAGAGAAGAACGTATCAGGAGAGAAACAGAGGAAAAAGAGCGCCGTAGGGCAGAGGATGAG  
CAGAGAGAAAAAGAAAGGGACCGCAGAAGACAAAGAAAAATGAGCAAGCTATTGGCCACTGTAGTTACTGGTCAGAGACA  
GGATAGACAGGGGGGAGAGCGAAGGAGGCCCCAACTCGATAAGGACCAATGCGCCTACTGCAAAGAAAAGGGACACTGGG  
CTAAGGATTGCCCAAGAAGCCACGGGGGCCCCGAGGACCGAGGCCCCAGACCTCCCTCCTGACCCTAGATGACTAGGGA  
GGTCAGGGTCAGGAGCCCCCCCCCTGAACCCAGGATAACCTCTACTGTGCGGGGGCAACCAGTCACCTTCTGGTGGATAC  
TGGGGCCCAACACTCCGTGCTGACCCAAAATCCTGGACCCCTAAGTGACAGGTCTGCCTGGGTCCAAGGGGCTACTGGAG  
GAAAGCGGTATCGCTGGACCACAGATCGCAAGGTACACCTGGCTACCGGTAAGGTCACTCACTCTTCTCCATGTGCCA  
GACTGCCCCCTATCCTTTGCTAGGAAGAGACTTGTGACTAACTAAAGGCCCAGATCCACTTCGAGGGATCGGGAGCTCA  
GGTTGTGGGACCAAAGGACAGCCCCCTACAGGTACTGACCCTAAGCATAGAGGATGAGTATCGGCTACATGAGACCTCAA  
CAGAGCCGGATGTTTTCTTAGGGTCCACCTGGCTTTCTGACTTTCCCCAGGCCTGGGCAGAAACCGGGGGCATGAGACTG  
GCAGTTGCGCAAGCGCCCCCTGATTATACCTCTAAAGGCAACCTCCACCCCTGTGTCCATCAAACAATACCCCATGTCACA  
CGAAGCCAGACTGGGGATCAAGCCCCACATACAGAGACTGTTGGACCAGGGAATATTGGTACCTTGCCAGTCCCCCTGGA  
ACACACCCCTGCTGCCCCGTTAAGAAACCAGGGACTAATGATTACAGGCCTGTCCAGGATCTGAGAGAAGTCAACAAGCGG  
GTGGAAGATATCCACCCACCGTGCCCAATCCTTACAACCTCTTAAGTGGACTCCCTCCGTCCCACCAAGTGGTACACTGT  
GCTCGATTTAAAGATGCCTTTTTCTGCCTGAGACTCCACCCACCAGTCAGCCTCTCTTCGCCTTTGAGTGGAGAGATC  
CAGAAATGGGAATCTCTGGGCAATTGACCTAGACAGACTCCACAGGGTTTCAAAAACAGTCCCACCCTGTTTAAATGAG  
GCACTGCACAGAGACCTAGCAGACTTCCGGATCCAGCACCCAGACTTGATCCTGTCTACGTACGTGGATGACTTACTGCT  
GGCCGCTACTTCCGAAGTACTGACCAACAAGGTACTCGGGCCCTACTACAAACCCTAGGGGACCTCGGATACCGGGCCT  
CGGCCAAGAAAGCCCAAATCTGCCAGAAACAGGTTAAATACCTGGGGTACCTTCTGAGGGAGGGTCAGAGATGGCTGACT  
GAGGCTAGAAAAGAGACTGTGATGGGGCAACCCGTTTCAAAGACTCCTCGACAACCTTAGGGAGTTCTTAGGGACGGCAGG  
CTTCTGCGCCTCTGGATCCCTGGGTTTGCAGAAATGGCGGCCCTTATACCCCTCTCACCAAACTGGGACTCTGTTTA  
ATTGGGGCCAGATCAGCAGAGGGCCTATCAAGAAATCAAACAGGCCCTCCTGACGGCCCCCTGCCCTGGGATTGCCAGAC  
TTGACCAAGCCCTTTGAACTCTTTGTGATGAAAAGCAGGGCTACGCCAAAGGGGTCTTAACGCAGAACTGGGACCTTG  
GCGCCGGCCTGTGGCCTACCTGTCCAAAAGCTGGACCCAGTGGCAGCCGGGTGGCCCCCTGCTTACGGATGGTAGCAG  
CCATTGCCATTCTGACAAAGGATGCAGGCAAACTAACGATGGGACAGCCGCTAGTCATTCTGGCCCCCATGCGGTAGAA  
GCACTGGTCAAACAACCCCTGACCGTTGGCTATCCAATGCCCGCATGACCCACTATCAGGCCATGCTCCTGGATACGGA  
ACGGGTTTCAAGTTCGACCGGTGGTGACCCTCAACCCGGCCACCTTGCTCCCCCTACCGGAAAAAGGAGCCCCCATGACT  
GCCTCGAGATCTTGGCTGAGACACATGGAACCAGACCGGACCTCACGGACCAGCCCATCCCAGACGCCGACCACACCTGG

TATACAGATGGAAGCAGCTTCCTACAAGAAGGACAGCGGAGAGCTGGAGCCGCGGTGACCACTGAGACCGAGGTAATCTG  
GGCAAGGGCACTGCCGGCTGGAACATCCGCCCAGCGAGCCAAACTGATAGCACTCACCCAAGCCTTAAAAATGGCAGAAG  
GTAAGAAGCTAAACGTTTACACTGATAGCCGCTATGCCTTCGCCACGGCCCATGTCCATGGAAAAATATATAGGAGGCGA  
GGGTTGCTGACCTCAGAAGGCAGAGAAATTAAAAACAAAAGCGAGATCTTGGCCTTGCTAAAAGCTCTCTTTCTGCCCAA  
AAGACTTAGTATAATTCAATTGTCCAGGACATCAGAAAAGAGACAGTGCCGAAGCCAGAGGCAACCGTATGGCAGACCAGG  
CGGCCCCGAGAGGCAGCCACAAAGACAGTTCAGAAAGCCTCTACACTCCTTATAGAGGACTCGACCCCGTACACGCCTGCC  
TATTTCCATTACACCGAAACAGATCTAAAAAGATTACGAGAACTGGGAGCCACCTATAACCAGATAAAAGGATATTGGGT  
CCTACAAGGCAAGCCGGTGATGCCCGATCAGTTTGTGTTTGAACATTAGACTCCCTTCACAGACTCACCCATCTCAGCC  
CTCAAAAGATGAAGGCACTCCTTGACAGAGAAGAAAGCCCCCTACTACATGTTAAACCGAGACAGAACTCTTCAGTATGTG  
GCGGAATCCTGCACAACCTTGTGCTCAAGTGAATGCTAGTAAAGCCAAAATCGGGGCAGGGGTACGAGTACGCGGACATCG  
ACCAGGTACCCATTGGGAAATTGACTTCACTGAAGTTAAACCAGGGCTGTACGGGTACAAGTACCTCCTGGTGTTCGTAG  
ACACCTTCTCTGGCTGGGTGAAAGCCTTCCCACTAAACGTGAAACTGCCAAGGTTGTAACCAAGAAGCTATTAGAAGAA  
ATATTTCCCAAGATTGGGGATGCCACAGGTATTGGGTTCCGATAATGGGCCTGCCTTCGTCTCCAGGTAAGTCAGTCGGT  
GGCCGATTTACTGGGGATCGATTAGAAATTACATTGTGCTTATAGACCCAGAGTTCAGGTCAAGTAAAAAGAATAAATA  
GAACCATCAAGGAGACTCTAACTAAATTAACGCTTGCAGCTGGCACTAGAGACTGGGTACTCCTACTCCCTTAGCCCTC  
TACCGAGCCCGGAACACTCCGGGCCCCCATGGACTGACCCCGTATGAAATTCTGTATGGGGCACCCCGCCCTTGTCAA  
TTTTTCATGATCCTGAAATGTCAAAGTTAACTAATAGTCCCTCTCTCCAAGCTCACTTACAGGCCCTCCAAGCAGTACAAC  
GAGAGGTCTGGAAGCCGCTGGCCGCTGCTTATCGGGACCAGCTAGATCAGCCAGTGATACCACACCCCTTCCGTGTGCGT  
GACGCCGTGTGGGTACGCCGGCACCAGACTAAGAACTTGAACCTCGCTGGAAGGACCCCTACACCGTCTGTGACCAC  
CCCCACCGCTCTCAAAGTTGACGGCATCTCTGCGTGGATACACGCCGCTCACGTAAAGGCGGCGACAACCTCCTCCGGCCG  
GAGCAGCATGGAAGGTCCAGCGTTCTCAAAACCCCTTAAAGATAAGATTAACCCGTGGGGCCCCCTAATAGTTATGGGGA  
TCTTGGTGAGGGCAGGAGCCTCGGTACAACGTGACAGCCCTCACCAGGTCTTCAATGTCACTTGGAGAGTTACCAACCTA  
ATGACAGGACAAACAGCTAACGCTACCTCCCTCCTGGGGACGATGACAGACACCTTCCCTAAACTATATTTTGAATTGTG  
TGATTTAGTTGGAGACAACTGGGATGACCCGGAACCCGATATTGGAGATGGTTGCCGCTCTCCGGGGGAAGAAAAAGGA  
CAAGACTATATGATTTCTATGTTTGCCCCGGCCATACTGTGCTAACAGGGTGTGGAGGGCCGAGAGAGGGCTACTGCGGC  
AAATGGGGATGTGAGACCACTGGACAGGCATACTGGAAGCCATCATCATGAGGACCTAATTTCCCTTAAGCGAGGAAA  
CACTCCTAAGGGTCAGGGCCCCCTGTTATGATTCTCTAGTGGTCTCCAGTAGCGTCCAGGGGGCCACACCGGGGGTGCAT  
GCAACCCCTAGTCTAGATTCACTGACGCAAGCTTAAAGAGCCAGCTGGGATGCCCCCAAAGTTTGGGAGCTAAGACTC  
TACCGATCCACAGGGGGCCGACCCGGTGACCCGGTTCTCTTTGACCCGCCAGGTCTCAATGTAGAGACCCCGCTCCCAT  
TGGGCCTAATCCCGTGATCACTGACCAGCTACCCCATCCCAACCCGTGCAGATCATGCTCCCCAGGCCTCCTCATCCTC  
CTCCTTCAGGCACGGTCTCTATGGTGCCTGGGGCTCCCCCGCTTCTCAACAACCTGGGACGGGGGACAGGCTGCTAAAC  
CTAGTAGAAGGAGCCTACCAAGCACTCAACCTCACCAGTCCCGACAGAACCCAAGAGTGCTGGCTGTGTCTGGTATCGGG  
ACCCCTTACTACGAAGGGGTTGCCGTCTAGGTACCTACTCCAACCATACCTCTGCCCCAGCTAACTGCTCCGTGGCCT  
CCCAACACAAGCTGACCCTGTCCGAAGTGACCGGACAGGGACTCTGCGTAGGAGCAGTTCCCAAAACCCATCAGGCCCTG  
TGTAATACCACCCAAAAGACGAGCGACGGGTCTACTATCTGGCTGCTCCCGCCGGGACCATCTGGGCTTGCAACACCGG  
GCTCACTCCCTGCCTATCTACCACTGTACTCAACCTCACCACCGATTACTGTGTCTGGTTGAGCTCTGGCCAAAGGTGA  
CCTACCACTCCCCTGTTTATGTTTATGGCCAGTTTGGAGAGAAAACCAAATATAAAAGAGAGCCGGTGTCTTAATCTG  
GCCCTGCTGTTGGGAGGACTTACTATGGGCGGCATAGCTGCAGGAGTAGAAACAGGGACTACAGCCCTAGTGGCCACCAA  
ACAATTGAGCAGCTCCAGGCAGCCATACATACAGACCTTGGGGCCTTAGAAAAATCAGTCAGTGCCCTAGAAAAGTCTC  
TGACCTCGTTGTCTGAAGTGGTCTACAGAACCGGAGAGGATTAGATCTGCTGTTCTTAAAGAAGGAGGATTATGTGCT  
GCTCTAAAGAAGAATGCTGTTTCTATGCAGACCACACTGGCGTAGTAAGGGATAGCATGGCTAAGCTGAGAGAAAGGCT  
AAACCAGAGACAAAATTTGTTGCAATCAGGACAAGGTGGTTTGGAGGACTGTTTAAACAGGTCCCCATGGTTCACGACCC  
TGATATCCACCATTATGGGCCCTCTGATAGTACTTTTATTAATCCTACTCCTCGGACCCTGCATTCTCAACCGCTTGGTC  
CAGTTTGTAAAAGACAGAATTTCCGTGGTGCAGGCCCTGGTTCTGACCCAACAGTATCACCAACTCAAATCAATAGATCC  
AGAAGAAGTGAAATCACGTGAATAAAAGATTTTATTAGTTTCCAGAAAGAGGGGGAATGAAAGACCCACCATAAGGC  
TTAGCAAGCTAGCTGCAGTAACGCCATTTTGAAGGCATGAAAAAGTACCAGAGCTGAGTTCTCAAAGCCACAAGAAAG  
TTTAGTTAAAAAATAAGGCTGAACAAAACCTAGGACAGGGGCCAAAACAGGATATCTGTGGTTCGAGCACCTGGGCCCCGGCT  
CAGGGCCAAAACAGATGGTACTCAGATAAAGCGAAACTAGCAACAGTTTCTGGAAAGTCCCACCTCAGTTTCAAGTTCC  
CCAAAAGACCGAGAAAAACCCCAAGCCTTATTTAACTAACCAATCAGCTCGCTTCTCGCTTCTGTAACCGCGCTTTTTG  
CCCCCAGCCCAAGCCCTATAAAAAGGGTAAAACTCCACACTCGGCGCGCCAGTCATCCGATAGACTGAGTCGCCCGGG  
TACCCGTGTTCCCAATAAAGCCTTTTGCCGTTTGCATCCGAGTCGTGGTCTCGCTGTTTCTTGGGAGGGTCTCCTCAGAG  
TAATTGACTACCCAGCTCGGGGGTCTTTCA

>Xmv42

TGAAAGACCCCATCATAAGGCTTAGCAAGCTAGCTGCAGTAACGCCATTTTGAAGGCATGAAAAAGTACCAGAGCTGAG  
TTCTCAAAAGCTACAAGAAAGTTAGTAAAAGATTAACAGTTAAAGATTAAGGCTGAATAATACTGGGACAGGGGCCAAA  
TATCGGTGGTCAAGCACCTGGGCCCCGGCTCAGGGCCAAGAACAGATGGCTCTCAGACGTCAAGTTAGCAGAACTAGCT  
TCACTGATTTAGAAAAATAGAGGTGCACAGTGCTCTGGCCACTCCTTGAACCTGTGTGTCTGTCAACGTTCTGACCAGGT

GTGTGCCCATTGTTGAACCTTCATTAGACCCTTTCTCGTACCCCTCCCATACCCATTTCTTGAGAATAGACATTGTTTGA  
GAACTAAAAAGTCCCACCTCAGTTTTCCCAAATGACCGGGAAATACCCCAAGCCTTATTCGAACTAACCAACCAGCTCGC  
TTCTCGCTTCTGTAAACGCGCTTTTTGCTCCCCAGCCCCAGCCCTATAAAAAGGGTAAAACTCCACACTCGGCGCGCCA  
GTCCTCCGATAGACTGAGTCGCCCCGGGTACCCGTATTCCCAATAAAGCCTCTTGCTGCTTGCCATCCGAATCGTGGTCTCG  
CTGGTCCTTGAGAGGGTCTCCTCAAATTGATTGACTTCCCACGTGCGGGGTCTTTCATTTGGAGGTCCCACCGAGATTTG  
GAGACCCCTGCCCAGGGACCACCGACCCCCCGCCGGGAGGTAAGCTGGCCAGCGGTGCTTCCGTGTCTGTCTCTGTCTTC  
GTGCGTGTGTTGTGCCGGCATCCAATGTTTGCGCCTGCGTCTGTACTAGTTAGCTAACTAGATCTGTATCTGGCGGTTCCG  
CGGAAGAACTGACGAGTTCGTATTCCCGGCCGAGCCCTGGGAGACGTCCCAGCGGCCTCGGGGGCCCGTTTTGTGGCCC  
ATTCTGTATCAGTTAACCTACCCGAGTCGGACTTTTTGGAGCTCCGCCACTGTACGTGGCTTTGTTGGGGGACGAGAGAC  
AGAGACACTTCCCGCCCCCGTCTGAATTTTTGCTTTTCGGTTTTACGCCGAAGCCGCGCGCGCTGATTTGTTTGTG  
TTCTTTTTGTTCTTCGTTAGTCTTCTTCTGTCTTTAAGTGTTTTCGAGATCATGGGACAGACCGTAACCTACCCCTCTGAGT  
CTAACCTTGACGACTGGGGAGATGTCCAGCGCATTGCATCCAATCAGTCTGTGGATGTCAGGAAGAGGCGCTGGGTTAC  
CTTCTGTTCCGCCGAATGGCCAACCTTTCAATGTGGGATGGCCTCAGGATGGTACTTTTAATTTAGGTATTATCTCTCAGG  
TCAAGTCTAGAGTGTTTTGTCTGGTCCCCACGGACACCCGGATCAGGTCCCATATATCGTCACCTGGGAGGCACTTGCC  
TATGACCCCCCTCCGTGGGTCAAACCGTTTGTCTCTCCAAAACCCCTCCTTCACCGACAGCTCCCGTCTCCCGCCCGA  
TCCTTCTGCGCAACCTCCGTCCCGATCTGCCCTTTACCCTGCCCTTACCCCTCTATAAAGTCCAAACCTCCTAAGCCCC  
AGGTTCTCCCTGATAGCGGCGGACCCCTCATTGACCTTCTCACAGAGGACCCCCCGCCGTACAGAGCACAAACCTCCTCC  
TCTGCCAGGGAGAACGACGAAGAAGAGGCGGCCACCTCCGAGGTTTTCCCCCTTCTCCCATGGTGTCTCGACTGCGGGG  
AAGGAGAGACCTCCCGCAGTGGACTCCACCACCTCCCAGGCATTTCCACTCCGCATGGGGGGAGATGGCCAGCTTCAGT  
ATTGGCCGTTTTCTCTTCGATTTATACAATTGGAATAAATAACCTTCTTTTTCTGAAGATCCAGGTAAATTGACG  
GCCTTGATTGAGTCCGTCTCATCACCCACCAGCCACCTGGGACGACTGTCAGCAGTTGCTGGGGACCTGCTGACCGG  
AGAAGAAAAGCAGCGGGTGCTCCTAGAGGCTAGAAAGGCAGTCCGGGGCAATGATGGACGCCCCACTCAGTTGCCTAATG  
AAGTCAATGCTGCTTTTCCCTTGAACGCCCCGATTGGGATTACACCACTACAGAAGGTAGGAACCACCTAGTCTCTAT  
CGCCAGTTGCTCTTAGCGGGTCTCCAAAACGCGGGCAGAAGCCCCACCAATTTGGCCAAGGTAAAAGGAATAACCCAGGG  
ACCTAATGAGTCTCCCTCAGCCTTTTTAGAGAGACTCAAGGAGGCCTATCGCAGGTACACTCCTTATGACCCTGAGGACC  
CAGGGCAAGAAACCAATGTGTCTATGTCAATCATCTGGCAGTCTGCCCCGGATATCGGGCGAAAGTTAGAGCGGTTAGAA  
GATTTAAAGAGCAAGACTTTAGGAGACTTAGTGAGGAAGCTGAAAAGATCTTTAATAAGCGAGAAACCCCGGAAGAAAG  
AGAGGAACGTATCAGGAGAGAAACCGAGGAAGAAGAACGCCGTAGGGCAGAAGATGAGCAGAGAGAGAAGAAAGAGG  
ACCGCAGAAGACATAGAGAGATGAGCAAGCTCTTGCCACTGTAGTTATTGGTCAGAGACAGGATAGACAGGGGGGAGAG  
CGGAGGAGGCCCCAATTGATAAGGACCAATGCGCCTACTGCAAAGAAAAGGGACACTGGGCTAAGGACTGCCCAAAGAA  
GCCACGAGGGCCCCGAGGACCGAGGCCCCAGACCTCCCTCCTGACCTTAGGTGACTAGGGAGGTGAGGGTACAGGAGCCCC  
CCCCTGAACCCAGGATAACCTTAAAGTCGGGGGGCAACCCGTACCTTCTTGGTAGATACTGGGGCCCCAACACTCCGTG  
CTGACCCAAAATCCTGGACCCCTAAGTGACAAGGCTGCCTGGGTCCAAGGGGCTACTGGAGGAAAGCGGTATCGCTGGAC  
CACGGATCGCAAAGTACATCTAGCTACCGGTAAGGTACCCACTCTTTCTCCATGTACCAGACTGCCCCCTATCCTCTGC  
TAGGAAGAGACTTGCTGACTAACTAAAAGCCCAGATCCACTTCGAGGGATCAGGAGCTCAGGTTGTGGGACCAATGGGA  
CAGCCCCTGCAAGTGCTGACCCTAAACATAGAAGATGAGTATCGGCTACATGAGACCTCAAAGAGCCGGATGTTTCTCT  
AGGGTCCACATGGCTTTCTGATTTTTCCCAGGCCTGGGCAGAAACCGGGGCATGGGACTGGCAGTTCCGCAAGCTCCTC  
TGATCATACCTCTGAAGGCAACCTCTACCCCCGTGTCCATAAAACAATACCCCATGTACAGGAAGCCAGACTGGGGATC  
AAGCCCCACATACAGAGGCTGTTGGACAGGGAATACTGGTACCCTGCCAGTCCCCCTGGAACACGCCCCCTGCTACCCGT  
TAAGAAACCAGGGACTAATGATTACAGGCCTGTCCAGGATCTGAGAGAAGTCAACAAGCGGGTGGAAGACATCCACCCCA  
CCGTGCCCAACCTTACAACCTCTTGAGCGGGCTCCCACCGTCCCACCAGTGGTACACTGTGCTTGATTTAAAGGATGCC  
TTTTTCTGCCTGAGACTCCACCCACCAGTCAGCCTCTCTTCGCCTTTGAGTGGAGAGATCCAGGGATGGGAATCTCAGG  
ACAATTGACCTGGACAGACTCCACAGGGTTTCAAAAACAGTCCCACCCTGTTTGATGAGGCACTGCACAGAGACCTAG  
CAGACTTCCGGATCCAGCACCCAGACTTGATCCTGCTACAGTACGTGGATGACATACTGCTGGCCGCCACTTCTGAGCTC  
GACTGCCAACAAGCTCACTTACAGGCCCTCCAAGCAGTACAACGAGAGGTCTGGAGGCCACTGGCTGCTGCTTATCAGGA  
CCAGCTGGATCAGCCAGTGATACACACCCCTTCCGTGTGGTGACGCCGTGTGGGTACGCCGCACCCAGACTAAGAAT  
TAGAACCCCGCTGGAAGGACCCTACACCGTCTGCTGACCTCCCCACCGCTCTCAAAGTAGACGGCATCTCTGCGTGG  
ATACACGCCGCTCACGTAAAGGCGGCGACAACCTCCTCCGGCCGGAACAGCATGGAAGGTCCAGCGTTCTCAAATCCCTT  
AAAGATAAGATTAACCCGTGGGGCCCCCTGATAGTTATGGGGATCTTAGTGAGGGCAGGAGCCTCGGTACAACGTGACAG  
CCCTCACCAGGTCTTCAATGTTACTTGAGAGGTTACCAACCTAATGACAGGACAAACAGCTAACGCCACCTCCCTCCTGG  
GGACGATGACAGACACCTTCCCTAACTATATTTTGACCTGTGTGATTTAGTAGGAGATTACTGGGATGACCCAGATGGA  
GATGGTTGCCGCTCTCCCGGGAGAAGAAAAAGGACAAGACTGTATGACTTCTATGTTTGCCCCGGTCATACTGTACCAGT  
AGGGTGTGGAGGGCCGAGAGAGGGCTACTGTGGCAAATGGGGATGTGAGACCACTGGACAGGCATACTGGAAGCCATCAT  
CATCATGGGACCTAATTTCCCTTAAGCGAGGAAACACTCCTAAGGATCAGGGCCCCCTGTTATGATTCTCGGTCTCCAGT  
GACGTCCAGGGTGCCACACCGGGGGGTGATGCAACCCCTAGTCTTAGAATTCAGTGACGCGGGTAAAAGGCCAGCTG  
GGATGCCCCCAAAGTTTGGGGACTAAGACTCTATCGATCCACAGGGGGCCGACCCGGTGACCCGTTCTCTTTGACCCGCC  
AGGTCTCAATGTAGGACCCCGCGCCCCCATTGGGCCTAATCCCGTGATCGCTGACCAGCTACCCCATCCCAACCCGTG

CAGATCATGCTCCCCAGGCCTCCTCATCCTCCTCCTTCAGGCACGGTCTCTATAGTACCTGGGGCTCCCCCGCCTTCTCA  
ACAACCTGGGACGGGAGACAGGCTGCTAAATCTGGTAAAAGGAGCCTACCAAGCACTCAACCTCACCAGTCCTGACAAAA  
CCCAAGAGTGCTGGTTATGTCTGGTATCGGGACCCCCCTACTACGAAGGGGTTGCCGTCTAGGTACCTACTCCAACCAT  
ACCTCTGCCCCAGCTAACTGCTCCGTGGCCTCCCAACACAAGCTGACCCTGTCCGAAGTGACCGGACAGGGACTCTGCGT  
AGGAGCAGTTCCCAAAACCCATCAGGCCCTGTGTAATACCACCCAGAAGACAAGCGACGGGTCTACTATCTGGCTGCTC  
CCGCCGGGACCATCTGGGCTTGCAACACCGGGCTCACTCCCTGCCTATCTACTACTGTACTCAACCTCACCACCGATTAC  
TGTGTCTCTGGTTGAACTCTGGCCAAGGGTGACCTACCCTCCCTGGTTATGTTTATGGCCAGTTTGAGAGAAAAACCAA  
ATATAAAAGAGAGCCGGTGTCACTAACTCTGGCCCTGCTGTTGGGAGGACTTACTATGGGCGGCATAGCTGCAGGAGTAG  
GAACAGGGACTACAGCCCTGGTGGCCACCAACAATTGAGCAGCTCCAGGCAGCCATACATACAGACCTTGGGGCCTTA  
GAAAAATCAGTCAGTGCCCTAGAAAAGTCTCTGACCTCGTTGTCTGAGGTGGTCCTACAGAACCGGAGAGGATTAGATCT  
GCTGTTCTCTAAAAGAAGGAGGATTATGTGCTGCCCTAAAAGAAGAATGCTGTTTCTACGCGGACCACACTGGCGTAGTGA  
GAGATAGCATGGCAAAGCTGAGAGAAAGGTTAAACCAGAGACAAAAATTGTTTCAATCAGGACAAGGGTGGTTTCGAGGGA  
CTGTTTAAACAGGTCCCCATGGTTACGACCTTGATATCCACCATTATGGGCCCTTGATAATACTTTTATTAATCCTACT  
CTTCGGACCCCTGTATTCTCAACCGCTTGGTCCAGTTTGTAAAAGACAGAATTTTCGGTGGTGCAGGCCCTGGTTCTGACCC  
AACAGTATCACCAACTCAAATCAATAGATCCAGAAGAAGTGAATCACGTGAATAAAAGATTTTATTTCAGTTTCCAGAAA  
GAGGGGGGAATGAAAGACCCCATCATAAGGCTTAGCAAGCTAGCTGCAGTAACGCCATTTTGAAGGCATGAAAAAGTAC  
CAGAGCTGAGTTCTCAAAAGCTACAAGAAAGTTAGTAAAAGATTAACAGTTAAAGATTAAGGCTGAATAATACTGGGAC  
AGGGGCCAAATATCGGTGGTCAAGCACCTGGGCCCGGCTCAGGGCCAAGAACAGATGGCTCTCAGACGTCAGTGTTAGC  
AGAACTAGCTTCACTGATTTAGAAAAATAGAGGTGCACAGTGCTCTGGCCACTCCTTGAACCTGTGTGTCTGTCAACGTT  
CTGACCAGGTGTGTGCCATTGTTGAACCTTCATTAGACCTTTTCTCGTACCCCTCCCATACCCATTTCTTGAGAATAG  
ACATTGTTTAGAATAAAAAGTCCACCTCAGTTTCCCCAAATGACCGGGAAATACCCCAAGCCTTATTTCGAACATAACCA  
ACCAGCTCGCTTCTCGCTTCTGTAACCGCGCTTTTTGCTCCCCAGCCCCAGCCCTATAAAAAGGGTAAAACTCCACACT  
CGGCGCGCCAGTCCTCCGATAGACTGAGTCGCGCGGGTACCCGTATTCCCAATAAAGCCTCTTGCTGCTTGCATCCGAAT  
CGTGGTCTCGCTGGTCTTTCGAGAGGGTCTCCTCAAATTGATTGACTTCCCACGTCGGGGGTCTTTCA

>Xmv43

TGAAAGACCCCACCATAAGGCTTAGCAAGCTAGCTGCAGTAACGCCATTTTGAAGGCATGAAAAAGTACCAGAGCTGAG  
TTCTCAAAAGTCACAAGGAAGTTTAGTTAAAGAATAAGGCTGAACAAAACCTGGGACAGGGGCCAAACAGGATATCTGTGG  
TCGAGCACTGGGGCCCGGCTCAGGGCCAAGAACAGATGGTACTCAGATAAAGCGAAACTAGCAACAGTTTCTGGAAAGT  
CCACCTCAGTTTCAAGTTCCCCAAAAGACCGGGAAAAACCCCAAGCCTTATTTAAACTAACCAATCAGCTCGCTTCTCG  
CTTCTGTAACCGCGCTTTTTGCTCCCCAGCCCTATAAAAAGGGTAAAAACCCACACTCGGTGCGCCAGTCATCCGATAG  
ACTGAGTCGCGCGGGTACCCGTGTTCCCAATAAAGCCTTTTGTGTTTGCATCCGAAACGTGGCCTCGCTGTTCTTTGGG  
AGGGTCTCCTCAGAGTGATTGACTACCCAGCTCGGGGGTCTTTTCAATTTGGGGGCTCGTCCGGGATTTGGAGACCCCGCC  
CAGGGACCACCGACCCACCGTCGGGAGGTAAGCTGGCCAGCGATCGTTTTGTCTCCGTCTCTGTCTTTGTGCGTGTGTGT  
GTGTGCCGGCATCTACTTTTTTGCCTGCGTCTGAATCTGTACTAGTTAGCTAACTAGATCTGTATCTGGCGGTTCCGTG  
GAAGAACTGACGAGTTCGTATTCCCGACCGCAGCCCTGGGAGACGTCTCAGAGGCATCAGGGGCGCGCTGGGTGGCCAA  
TCAGTAAGTCCGAGTCCTGACCGATTTCGACTATTTGGAGCCCTCCTTTGTGCGAGGGGTACGTGGTTCTTTTAGGAGA  
CGAGAGGTCCAAGCCCTCGCCGCTCCATCTGAATTTTTGCTTTTCGGTTTTTCGCCGAAACCGCGCCGCGCTCTTGCT  
GTCTCAGTGTTGTTTTGTCAATTTGTCTGTTTCTGTTATTGTTTTGGACCGTTTTCTAAAAATATGGGACAGACCGTAACCACC  
CCTCTGAGTCTGACCCTAGAACACTGGGGAGACGTCCAGCGCATCGCGTCCAACAGTCCGTGGACGTCAAGAAGAGACG  
CTGGGTACCTTCTGCTCTGCCGAGTGGCCAACCTTTTCGGTGTAGGGTGGCCGCAAGATGGTACTTTTAATTTGGACATTA  
TTTTACAGGTAAATCTAAGGTGTTCTCTCCCGGTCCCCACGGACACCCGGATCAGGTCCCATACATTGTACCTGGGAG  
GCTATTGCCTATGAACCCCTCCGTGGGTCAAACCTTTTGTCTCTCCCAACTCTCCCTCTCTCCAACCGCTCCCATCCT  
CCCATCCGGTCTTCGACCCAACCTCCGCCCGATCTGCCCTTTACCCTGCTCTTACCCCTCTATAAAAACCCAGACCTT  
CTAAACCTCAGGTTCTCTCCGATAATGGCGGACCTCTCATTGACCTTCTCACAGAAGACCCCTCCGCCGTACGGAGAACAG  
GGACCGTCTCTCTGACGGAGATGGCGACAGAGAAGAGGCCACCTCCACTCCTGAGATTCTGCCCCCTCTCCCATGGT  
GTCTCGCTTGGGGGCAAAAGAGACCCCCCGCGGAGTTTCCACCACCTCTCGGGCTTTCCCACTCCGTTTGGGGGGTA  
ATGGTCAGTTGCGAGTACTGGCCGTTTTCTCCTCGGATCTATATAACTGAAAAATAATAACCCTTCTTCTCTGAAGAT  
CCAGGTAAATTGACTGCCTTAATCGAGTCTGTCTCACCACCCACCAGCCTACTTGGGATGACTGTCAACAGTTGCTGGG  
GACTCTGCTGACAGGAGAAGAAAAGCAGCGGGTGTCTTGGAAAGCCAGAAAGGCAGTCCGGGGCGACGATGGCCGCCCCA  
CCCAATTGCCCAATGAGATCGAGGCTGCCTTTCCCTCGAACGTCCCGACTGGGACTACACCACCTTAGAGGTAGGAAC  
CACCTAGTTCTCTATCGCCAGCTGCTCTTGGCGGGTCTCCAAAATGCGGGCAGGAGCCCCACCAATTTGGCTAAGGTAAA  
AGGAATAACCCAGGGGTCCAACGAGTCGCCCTCGGCCCTTTCTAGAGAGACTCAAAGAGGCCTATCGCAGATACACTCCTT  
ATGACCCTGAGGACCCTGGGCAAGAAACCAATGTATCCATGTCTGTTTCTGTCAGTCTGCTCCAGACATTGGTCGAAAG  
TTAGAGCGGTTAGAAGACTTAAAAAATAAGACCTTAGGGGACTTAGTGAGAGAAGCAGAAAGGATCTTTAATAAGAGAGA  
GACCCCAAGAGAGAGAAGAACGTATTAAGAGAGAAACAGAGGAAAAAGAGGAGCGCCGTAGGGCAGAGGATGAGCAGA  
AAGAGAAAGAGAGGGACCGCAGAAAGACAGAGAGAAATGAGCAAACCTTTGGCCACCGTAGTTACAGGTGAGAGACAGGAT  
AGACAGGGGGGAGAGCGAAGGAGGCCCAACTCGATAAGGACCAATGCGCCTACTGCAAAGAAAAGGGACACTGGGCTAG

GGATTGCCCCAAGAAGCCACGGGGGCCCCGAGGACCGAGGCCCCAGACCTCCCTCCTGACCCTAGATGACTAGGGAGGTC  
AGGGTCAGGAGCCCCCCCCCTGAACCCAGGATAACCCCTTACTGTGCGGGGGCAACCAGTCACCTTCCTGGTGGATACTGGG  
GCCCCAACTCCGTGCTGACCCAGAACCCTGGACCCCTAAGTGACAGGTCTGCCTGGGTCCAAGGGGCTACTGGAGGAAA  
GCGGTATCACTGGACCACAGATCGCAAGGTGCACCTGGCTACCGGTAAGGTCACTCACTCTTTCTCCATGTGCCGGACT  
GCCCTTATCCTTTGCTAGGAAGGGACTTGTGACTAAGTTAAAGGCCAGATCCACTTCGAGGGATCGGGAGCTCAGGTT  
GTGGGACCAAAAGGACAGCCCCCTGCAGGTGTTGACCCTTGGCATAGAGGATGAGTATCGGCTACATGAGACCTCAACAGA  
GCCGGATGTTTTCTCTAGGGTCCACCTGGCTTTCTGACTTTCCCCAGGCCTGGGCAGAAACCGGGGGCATGGGACTGGCAG  
TTCGCCAAGCGCCTCTGATTATACCTCTAAAGGCAACCTCCACCCCTGTGTCCATCAAACAGTACCCCATGTACACGAA  
GCCAGACTGGGGATCAAGCCCCACATACAGAGACTGTTGGACCAGGGAATATTGGTACCTTGCCAGTCCCCCTGGAACAC  
ACCCCTGTGCCCCGTTAAGAAACAGGGACTAATGATTACAGGCCCTGTCCAGGATCTGAGAGAAGTCAACAAGCGGGTGG  
AAGATATCCACCCACCGTGCCCAATCCTTACAACCTCTTAAGTGGACTCCCTCCGTCCCACCAGTGGTACACTGTGCTT  
GATTTAAAGATGCCTTTTTCTGCCTGAGACTCCACCCACCAGTCAGCCTCTCTTTGCCTTTGAGTGGAGAGATCCAGA  
AATGGGAATCTCTGGACAATTGACCTGGACCAGACTCCCACAGGGTTTCAAAAACAGTCCCACCCTGTTTGATGAGGCAT  
TGCACAGAGACCTAGCAGACTTCCGGATCCAGCACCCAGACTTGATCCTGCTACAGTACGTGGATGACTTACTGCTGGCC  
GCTACTTCCGAAGTAGACTGCCAACAAGGTACTCGGGCCCTTCTACAAACCCTAGGGGACCTCGGATACCGGGCCTCGGC  
CAAGAAAGCCCCAATCTGCCAGAAACAGGTAAATACCTGGGGTACCTTCTGAGGGAGGGTCAGAGATGGCTGACTGAGG  
CTAGAAAAGAGACTGTGATGGGGCAACCCGTTCCAAAGACTCCTCGACAACCTAAGGGAGTTCCTAGGGACGGCAGGCTTC  
TGCCGCTCTGGATCCCTGGGTTTGCAGAAATGGCGGCCCTTGTATCCTCTTACCAAAACGGGGACTCTGTTTAATTG  
GGGCCCAGACCAGCAAAAGGCCTATCAAGAAATCAAACAGGCCCTTCTAACTGCCCCCGCCCTGGGATTGCCAGATTTGA  
CTAAGCCCTTTGAACTCTTTGTGACGAGAAGCAGGGCTACGCCAAAGGCGTCCTAACGCAAAAACCTGGGACCTTGGCGT  
CGGCCTGTGGCCTACCTGTCCAAAAGCTAGACCCAGTGGCAGCCGGGTGGCCCCCTTGCCCTACGGATGGTAGCAGCCAT  
TGCCGTTCTGACAAAAGATGCAGGCAAGCTAACTATGGGACAGCCGCTAGTCATCCTGGCCCCCATGCAGTAGAGGCAC  
TGGTCAAGCAACCCCTGACCGCTGGCTATCCAACGCCCGCATGACCCACTACCAGGCAATGCTCCTAGACACTGACCGA  
GTTTCAGTTCGGACCAGTGGTGGCCCTCAATCCTGCCACCTTGCTCCCTCTACCGGAAAAAGGAGCCCCCATGATTGCCT  
CGAGATCTTGGCTGAAACGCATGGAACCAGACCGGATCTCACCGACCAGCCCATCCCAGACGCCGACCACACCTGGTATA  
CCGATGGGAGCAGCTTTCTGCAAGAAGGACAGCGAAAGGCTGGGGCAGCAGTGACGACTGAAACCGAGGTAATCTGGGCG  
AGGGCCCTGCCAGTTCGAAAGCTCAGCCAGCGAGCCGAAGCTGATGCACTACCCGAGCCCTGAAAAGCTGAAAATGGCAGAGGTAA  
GAAGCTAAATTTTACACTGATAGCCGCTATGCCTTCGCTACGGCCCATGTTTCATGGGGAATATATAGAGAGCGGGGT  
TGCTGACCTCAGAAGGCAAGGAAATCAAGAACAAGCGAGATCCTAGCCTTGCTGAAAGCCCTCTTTTTGCCAAAGAGA  
CTCAGTATTATCCATTGCCAGGACATCAGAAAGGAGACAGTGCCGAAGCCAGAGGCAACCGTATGGCAGACCAGGCGGC  
CCGAGAGGCAGCCACAAAACAGTTCCAGAAGCCTCTACACTCCTTATAGAGGACTCGACCCCGTACACGCCTGCCTATC  
TCCATTACACCGAAACAGATCTAAAAAGATTGCGAGAAGTGGGGGCCACCTATAATCAGATAAAAGGATATTGGGTCTTA  
CAAGGCAAGCCGGTGATGCCCCGATCAGTTTGTGTTTGAATTATTAGACTCCCTTCATAGACTCACCCATCTCAGCCCTCA  
AAAGATGAAGGCGCTCCTTGACAGAGAAGAAAGCCCTACTACATGTTAAACAGGGACAGAACTCTTCAGTATGTGGCAG  
AATCCTGCACAGTCTGTGCTCAAGTAAATGCTAGTAAAGCCAAAATCGGGGCAGGGGTACGAGTACGCGGACATCGACCA  
GGTACCCATTGGGAAATTGACTTCACTGAAGTTAAACCAGGGCTGTACGGGTACAAGTACCTCCTGGTGTTCGTAGACAC  
CTTCTCTGGCTGGGTGGAAGCCTTCCCACTAAACGTGAAACTGCCAAGGTTGTGACCAAGAAGCTATTAGAAGAAATAT  
TCCCAAGATTCCGGATGCCACAGGTATTGGGTTCCGATAATGGGCCTGCCTTCGTCTCCAGGTAAGTCAGTCGGTGGCC  
GATTTACTGGGGATCGATTGGAATTAACATTGTGCTTATAGACCCAGAGTTCAGGTACAGGTAGAAAGAATGAATAGAAC  
CATCAAGGAGACTCTAACTAAATTAACGCTTGACAGCTGGCACTAGAGACTGGGTACTCCTACTCCCCCTTAGCCCTCTACC  
GAGCCCGGAACACTCCGGGCCCCCATGGACTGACTCCGTATGAAATTCGTATGGGGCACCCCCGCCCTTGTCATTTT  
CATGATCCTGAAATGTCAAAGTTAACTAATAGTCCCTCTCTCCAAGCTCACTTACAGGCCCTCCAAGCAGTACAACGAGA  
GGTCTGGAAGCCGCTGGCCGCTGCTTATCAGGACCAGCTAGATCAGCCAGTGATACCACACCCCTTCCGTGTGGTGACG  
CCGTGTGGGTACGCCGGCACCAAGACTAAGAACTTGGAACCTCGCTGGAAAGGACCCTACACCGTCTGCTGACCACCCCC  
ACCGCTCTCAAAGTTGACGGCATCTCTGCGTGGATACACGCCGCTCAGCTAAAGGCGGCGACAACCTCCTCCGGCCGGAGC  
AGCATGGAAGGTCCAGCGTTCTCAAAACCCCTTAAAGATAAGATTAAACCGTGGGGCCCCCTAATAGTTATAGGGATCTT  
GGTGAGGGCAGGAGCCTCGGTACAACGTGACAGCCCTCACCAGGTCTTCAATGTCACTTGAGAGATTACCAACCTAATGA  
CAGGACAAACAGCTAACGCTACCTCCCTCCTGGGGACGATGACAGACACCTTCCCTAACTATATTTTACTTGTGTGAT  
TTAGTTGGAGACCATTGGGATGACCCAGAACCCGATATTGGAGATGGTTGCCGCTCTCCGGGGGAAGAAAAAGGACAAG  
ACTGTATGACTTCTATGTTTGGCCCGGTCATACTGTACCAATAGGGTGTGGAGGGCCGGGAGAGGGCTACTGTGGCAAT  
GGGGATGTGAGACCACTGGACAGGCATACTGGAAGCCATCATCATCATGGGACCTAATTTCCCTTAAAGCGAGGAAACACT  
CCTAAGGATCAGGGCCCCCTGTTATGATTCTCGGTCTCCAGTGGCGTCCAGGGTGCCACACCGGGGGGTGATGCAACCC  
CCTAGTCTTAGAATTCAGTACGCGGGTAAAAAGGCCAGCTGGGATGCCCCCAAAGTTTGGGGACTAAGACTCTACCGAT  
CCACGGGGGGCCGACCCGGTGACCCGGTTCTCTTTGACCCGCCAGGTCTCAATGTAGGACCCCGCGTCCCCATTGGGCCT  
AATCCCGTGATCACTGAACAGCTACCCCCCTCCCAACCCGTGCAGATCATGCTCCCAGGCCTCCTCATCCTCCTCCTTC  
AGGCGCGCCTCTATGGTGCCTGGGGCTCCCCCGCCTTCTCAACAACCTGGGACGGGGGACAGGCTGCTAAACCTAGTAA  
AAGGAGCCTATCAAGCACTCAACCTCACCAGTCCCAGACAGAACCCAAGAGTGCTGGCTGTGTCTGGTATCGGGACCCCC

TACTACGAAGGGGTTGCCGTCCTAGGTACCTACTCCAACCATACCTCTGCCCCAGCTAACTGCTCCGTGGCCTCCCAACA  
CAAGCTGACCCTGTCCGAAGTGACCGGGCAGGGACTCTGCGTAGGAGCAGTTCCCAAAACCCATCAGGCCCTGTGTAATA  
CCACCCAGAAGGCGAGCGACGGGTCTACTATCTGGCTGCTCCCGCCGGGACCATCTGGGCTTGCAACACCGGGGCTCACT  
CCCTGCCTATCTACCACTGTACTCAACCTCACCACCGATTACTGTGTCTCTGGTTGAGCTCTGGCCAAAGGTGACCTACCA  
CTCCCCCTGGTTATGTTTATGACCAGTTTGAGAGAAAAACCAATATAAAAGAGAGCCGGTGTCAATTAACCTCTGGCCCTGC  
TGTTGGGAGGACTTACTATGGGCGGCATAGCTGCAGGAGTAGGAACAGGGACTACAGCCCTAGTGGCCACCAACAATTC  
GAGCAGCTCCAGGCAGCCATACATACAGACCTTGGGGCCTTAGAAAAATCAGTCAGTGCCCTAGAAAAGTCTCTGACCTC  
GTTGTCTGAGGTGGTCTTACAGAACCGGAGAGGATTAGATCTGCTGTTCTCTAAAAGAAGGAGGATTATGTGCTGCCCTAA  
AAGAAGAATGCTGTTTCTATGCAGACCACACTGGCGTAGTAAGGGATAGCATGGCTAAGCTAAGAGAAAAGGCTAAACCAG  
AGGCAAAAATTGTTTCAATCAGGACAAGGGTGGTTTGAGGGACTGTTTAAACAGGTCCCCATGGTTTACGACCCCTGATATC  
CACCATTATGGGCCCTCTGATAGTACTTTTATTAATCCTACTCCTCGGACCCTGCATTCTCAACCGCTTGGTCCAGTTTG  
TAAAAGACAGAATTTTCGGTGGTGCAGGCCCTGGTTCTGACCCAACAGTATCACCAACTCAAATCAATAGATCCAGAAGAA  
GTAGAATCGCGTGAATAAAAGATTTTATTAGTTTCCAGAAAGAGGGGGGAATGAAAGACCCCCACCATAAGGCTTAGCAA  
GCTAGCTGCAGTAACGCCATTTTGCAAGGCATGAAAAAGTACCAGAGCTGAGTTCTCAAAAGTCACAAGGAAGTTTAGTT  
AAAGAATAAGGCTGAACAAAACCTGGGACAGGGGCCAAACAGGATATCTGTGGTCGAGCACCTGGGCCCCGGCTCAGGGCC  
AAGAACAGATGGTACTCAGATAAAGCGAAACTAGCAACAGTTTCTGGAAAGTCCCACCTCAGTTTCAAGTTCCCCAAAAG  
ACCGGGAAAAACCCCAAGCCTTATTTAAACTAACCAATCAGCTCGCTTCTCGCTTCTGTAACCGCGCTTTTTGCTCCCCA  
GCCCTATAAAAAGGGTAAAAACCCACACTCGGTGCGCCAGTCATCCGATAGACTGAGTCGCCCCGGGTACCCGTGTTCCC  
AATAAAGCCTTTTGTCTGTTTGCATCCGAAACGTGGCCTCGCTGTTCTCTGGGAGGGTCTCCTCAGAGTGATTGACTACCC  
AGCTCGGGGGTCTTTCA

>Xmv8

TGAAAGACCCCCACCATAAGGCTTAGCAAGCTAGCTGCAGTAACGCCATTTTGAAGGCATGAAAAAGTACCAGAGCTGAG  
TTCTCAAAAGTTACAAGGAAGTTCAAGTTAAAGATTAACAGTTAAAAATCAAGGCTGAATAATACTAGGACAAGGGCCAAA  
AAGGGTATATCGGTGGTCAAGCGCCTGGGCCCCGGCTCAGGGCCAAGAACCAGTGGTACCCACCTGGGCCCCGGCTCAGG  
GCCAAGAACAGATGGTACCCAGATAAAGCGGAACCAGCAACAGTTTCTGAAAAAGTCCCACCTCAGTTTCAAGTTCCCCA  
AATGACCAGGAAATACCCCAAGCCTTGATTTAACTAACCACTCAGCTCGCTTCTCGCTTCTGTACCCACGCTTTTTGTCT  
CCCCAGCCCCAGCCTTATAAAAAGGGTAAAAACCCACACTCGGCGCGCCAGTCCTCCGATAGACTGAGTCGCCCGGGTA  
CCCGTGTTCCTCAATAAAGCCTCTTGCTGATTACATCCGAATCGTGGTCTCGCTGATCCTTGGGAGGGTCTCCTCAGATTG  
ATTGACCACCCACCTCGGGGTCTTTTCAATTTGGAGGTTCCACCGAGATTAGGAGACCCCTGCCAGGGACCACCGACCCC  
CGCCGGGAGGTAAGCTGGCCAGCGGTCTGTTTCTGTCTGTCTCTGTCTCCGTGCGTGTGTTGTGCCGGCATCTAATGTTTG  
CGCCTGCGTCTGTACTAGTTGGCTAACTAGATCTGAATCTGGCGGTTCCGTGGAAGAACTGACGAGTTTCAATTTCCCGGC  
CGCAGCCCTGGGAGACGTCTCAGAGGCATCGGGGGCCATCTTTGTGGCCCAATCTGTATCTGAGAACCCGACCCGTCTCG  
GACTCCTTGGAGCCTCTCCTTTGACCGAGGGATACGTGGTCTGTTGGGCGGCGAGGGGCCGAAACGCTCCTCTCCCCCA  
TCTGAATTTTTGTCTTTTCGGTTTTTCCGCCGAAACCGCGCCGCGCTTGTCTGTCTCTGTGTTGTTTTGTCAATTTGTCTCG  
TTCGTTATTGTTTTGGACCGTTTTCTAAAAATATGGGACAGACCGTAACCACTCCTTTGAGTCTGACCCTAGAACACTGGG  
GAGACGTCCAGCGCATTGCGTCCAACAGTCCGTGGACGTCAAGAAGAGACGTTGGGTACCTTCTGCTCTGCCGAGTGG  
CCAATTTCAATGTGGGGTGGCCGCAAGATGGTACTTTTAATTTGGACATTATTTTACAGGTTAAATCTAAGGTATTCTC  
TCCCGGTCCCCACGACACCCGGATCAGGTCCCATACATTGTACCTGGGAGGCACTTGCCATGACCCCCCTCCGTGGG  
TCAAACCGTTTTGTCTCTCCAAAACCCCCCTCCTTTACCGACAGCTCCCGTCTCTCCCGCCCGGTCTTTCTGCGCAACCTCCG  
TCCCGATCTGCCCTTTACCCTGCCCTTACCCCTCTATAAAGCCCCAAACCTCCTAAGCCCCAGGTTCTCCCTGATAGCGG  
CGGACCTCTCATTGACCTTCTCAGAGGACCCCCCGCCGTACGGAGCACAACTTCTCTCTGCCAGAGAAAACAATG  
AAGAAGAGGCGGCCGCCACCTCCGAGGTTTCCCCCCTTCTCCCATGGTGTCTCGACTGCGGGGAAGGAGGGACCTCCC  
GCAGCGGACTCCACCTCCTCCAGGCATTCCCACTCCGCATGGGGGGAGATGGCCAGCTTCAGTATTGGCCGTTTTCTCT  
CTCGGACTTATACAATTGAAAAATAATAACCTTCTCTTTCTGAAGATCCAGGTAAATTGACGGCTTTGATTGAGTCCG  
TCCTCATCACCCACCAGCCACCTGGGACGACTGTGACAGTTGTTAGGGACCTGCTGACCGGAGAAGAAAAGCAGCGG  
GTGCTCTAGAGGCTAGAAAGGCAGTCCGGGGCAATGATGGACGCCCACTCAGTTGCCTAATGAAGTCAATGCTGCTTT  
TCCCCTTGAACGCCCCGATTGGGATTACACCACTACAGAAGGTAGGAACCACTAGTCCTCTATCGCCAGTTGCTCTTAG  
CGGGTCTCCAAAACGCGGGCAGAAGCCCCACCAATTTGGCCAAGGTAAAAGGGATAACCCAGGGACCTAATGAGTCTCCC  
TCAGCCTTTTTAGAGAGACTCAAGGAGGCCTATCGCAGGTACACTCCTTATGACCCTGAGGACCCAGGGCAAGAAACCAA  
TGTGTCTATGTCATTCTGTCAGTCTGCCCCGATATCGGGCGAAAGTTAGAGCGGTTAGAAGATTTAAAGAGCAAGA  
CCTTAGGAGATTTAGTGAGGGAAGCTGAAAAGATCTTTAATAAGCGAGAAACCCCGGAAGAAAGAGAGGAACGTATCAGG  
AGAGAAACAGAGGAAAAAGAAGAACGCCGTAGGGCAGAGGATGAGCAGAGAGAGAAAGAAAGGGACCGCAGGAGACATAG  
AGAAATGAGCAAGCTCTTGGCCACTGTAGTTAGTGACAGAGACAGGATAGACAGGGGGGAGAGCGAAGGAGGCCCCAAC  
TTGATAAGGACCAATGCGCCTACTGCAAGGAAAAGGGACACTGGGCTAAGGACTGCCCAAGAAGCCACGAGGGCCCCGA  
GGACCGAGGCCCCAGACCTCCCTCCTGACCTTAGGTGACTAGGGAGGTGAGGGTCAAGGAGCCCCCCCCGAACCCAGGATA  
ACCCTCAAAGTCGGGGGGCAACCCGTACCTTCTGGTAGATACTGGGGCCCAACACTCCGTGCTGACCCAAAATCCTGG  
ACCCCTAAGTGACAAGTCTGCCTGGGTCCAAGGGGCTACTGGAGGGAAGCGGTATCGCTGGACCACGGATCGCAAAGTAC

ATCTAGCTACCGGTAAGGTCACCCACTCTTTCTCCATGTACCAGACTGCCCCATCCTCTGCTAGGAAGAGACTTGCTG  
ACTAAACTCAAAGCCCAGATCCACTTCGAGGGATCAGGAGCTCAGGTTGTGGGACCGATGGGACAGCCCCCTGCAAGTGCT  
GACCCTAAACATAGAGGATGAGTATCGGCTACATGAGACCTCAACAGAGCCGGATGTTTCTCTAGGGTCCACCTGGCTTT  
CTGATTTTCCCCAGGCCTGGGCGGAACTGGGGGCATGGGACTGGCAGTTTCGCCAAGCGCCTCTGATTATACCTCTGAAG  
GCAACCTCCACCCCTGTGTCCATAAAACAATACCCCATGTACAGGAAGCCAGACTGGGGATCAAGCCCCACATACAGAG  
GCTGTTGGACCAGGGAATACTGGTACCCTGCCAGTCCCCCTGGAACACGCCCCCTGCTACCCGTTAAGAAACCAGGGACTA  
ATGATTACAGGCCTGTCCAGGATCTGAGAGAAGTCAACAAGCAGGTGGAAGACATCCACCCACCGTGCCCAACCCTTAC  
AACCTCTTGAGCGGGCTCCCACCGTCCCACCAGTGGTACACTGTGCTTGATTAAAGGATGCCTTTTTCTGCCTGAGACT  
CCACCCACCAGTCAGCCTCTCTTCGCCTTTGAGTGGAGAGATCCAGGGATGGGAATCTCAGGACAATTGACCTGGACCA  
GACTCCCACAGGTTTTCAAAAACAGTCCCACCCTGTTTGACGAGGCTCTGCACAGAGACCTAGCCGACTTCCGAGTCCAG  
CACCAGACTTGATCCTGTGTCAGTACGTAGATGACTTACTGCTGGCCGCGACTTCCGAGCCTGACTGCCAACAAGGTAC  
TCGAGCCCTATTACAAACCTTAGGGGACCTCGGATACCGGGCCTCGGCCAAGAAAGCCCAACTTTGCCAGAAACAGGTCA  
AGTATCTGGGGTATCTTCTAAAGAGGGTCAGAGATGGCTGACTGAGGCCAGAAAAGAGACTGTGATGGGGCAGCCTACT  
CCGAAGACCCCTCGACAACTAAGGGAGTTCCTAGGGACGGCAGGCTTCTGTGCGCTCTGGATCCCTGGGTTTGCGGAAAT  
GGCAGCCCCCTTGTATCCTCTTACCAAAACGGGGACTCTGTTTAATTGGGGCCAGACCAGCAAAAGGCCTATCAAGAAA  
TCAAACAGGCCCCTTCTAACTGCCCCGCCCCTGGGATTGCCAGATTTGACTAAACCCTTTGAACTCTTTGTGACGAGAAG  
CAGGGCTACGCCAAAGGCGTCTTAACGCAAAAACCTGGGACCTTGGCGTCGGCCTGTGGCCTACCTGTCCAAAAGCTAGA  
CCCAGTGGCAGCTGGGTGGCCCCCTTGCCCTACGGATGGTAGCAGCCATTGCCGTTTTGATAAAAGATGCAGGCAAACTAA  
CTATGGGACAGCCGCTAGTCATCCTGGCCCCCATGCAGTAGAGGCAGTGGTCAAGCAACCCCTGACCGCTGGCTATCC  
AATGCCCCCATGACCCACTACCAGACAATGCTCCTAGACACTGACCGAGTTCAGTTCGGACCAGTGGTGGCCCTCAATCC  
TGCCACCTTGCTCCCTCTACCGGAGAAAGGAGCCCCCATGATTGCCTCGAGATCTTGGCTGAAACGCATGGAACCAGAC  
CGGACCTCACCGACCAGCCCATCCCAGACGCCGACCACACCTGGTATACCGATGGGAGCAGCTTTTTGCAAGAAGGACAG  
CGAAAAGCTGGGGCAGCAGTGACGACAGAGACCGAGGTAATCTGGGCGAGGGCCCTGCCAGCTGGAACGTCAGCCCAGCG  
AGCCGAACCTGATCGCACTCACCCAAGCCCTGAAAATGGCAGAAGGTAAGAAGCTAAATGTTTACACTGACAGCCGATATG  
CTTTCGCCACGGCCCCTGTCCATGGAGAAATCTATAGGAGGCGAGGGTTGCTGACCTCAGAGGGCAGAGAAATCAAAAAC  
AAGAGCGAGATCCTGGCTTTACTGAAAGCTCTTTTCTGCCTAAAAGACTCAGTATAATTCACTGCCCCGGGCATCAAAA  
GGGAACAGTGTGAAGCAGGGGCAACCGTATGCGACAGCAAGCGGCCGAGAGGCAGCCATAAGGACATCTCCAGAAA  
CTTCCACCCTCCTCATAGAGACTCGACCCCGTATGACGCCCTCCCATTTCCTACTACACTGAAACAGATCTAAAGAGATTA  
CGAGAAGTGGGAGCCACCTATAATCAGATAAAAGGATATTGGGTTCTACAAGGCAAGCCGGTAATGCCCGATCAGTTTGT  
GTTTGAACCTATTAGACTCCTTACACAGGCTCACTCACCTCAGCCCTCAAAAAGATGAAGGCACTCCTTGACAGAGAAGAAA  
GCCCCTACTACATGTTAAACAGAGACAGAACTCTCCAGTATGTGGCAGAATCATGCACAGCTTGTGCTCAAGTGAATGCT  
AGTAAAGCCAAGATCGGGGCAGGGGTACGAGTACGCGGACATCGACCAGGTACCCATTGGGAAATTGACTTTACTGAAGT  
TAAGCCAGGACTGTACGGGTACAAGTACCTCCTAGTGTTCGTGGACACCTTCTCTGGCTGGGTAGAAGCCTTCCCAACTA  
AACGTGAAACCGCCAAGGTGGTAACCAAGAAGCTATTAGAAGAAATATTCCCAAGATTGGGGATGCCACAGGTACTGGGT  
TCTGACAATGGGCCTGCCTTCGTCTCCCAAGTAAGTCATTCCGTGGCCGATTTACTGGGGATTGATTGGAAGTTACATTG  
TGCTTATAGACCCAGAGTTTCAGGTGAGGTAGAGAGAATGAATAGAACCATCAAGGAGACTTTAACCAAATTAACGCTTG  
CAGCTGGCACTAGAGACTGGGTACTCCTACTCCCCCTGGCCCTCTACCGAGCCCGGAATACTCCGGGCCCCCATGGACTT  
ACTCCGTATGAAATCCTGTATGGGGCACCCCCGCCCCCTCGTCAATTTTCATGATCCTGAAATGTCAAAGTTAACTAATAG  
TCCCTCTCTCCAAGCTCACTTACAGGCCCTCCAAGCAGTACAACGAGAGGTCTGGAAGCCACTGGCCGCTGCTTATCAGG  
ACCAGCTGGATCAGCCAGTGATACCACACCCCTTCCGTGTGCGGTGACGCCGTGTGGGTACGCCGGCACCAGACTAAGAAC  
CTAGAACCTCGCTGGAAGGACCCCTACACCGTCTTACTGACCACCCCCACCGCTCTCAAAGTAGACGGCATCTCTGCGTG  
GATACACGCCGCTCACGTAAAGGCGGCGACAACCTCCTCCGGCCGGAACAGCATGGAAGGTCCAGCGTTCTCAAAATCCCT  
TAAAGATAAGATTAAACCCGTGGGGCCCCCTGATAGTTATGGGGATCTTAGTGGGGCAGGAGCCTCGGGACAACGTGACA  
GCCCTCACAGGTCTTCAATGTTACTTGGAGAGTTACCAACCTAATGACAGGACAAACAGCTAACGCCACCTCCCTCCTG  
GGGACGATGACAGACACCTTCCCTAAACTATATTTGACCTGTGTGATTTAGTAGGAGACTACTGGGACGACCCAGATGG  
AGATGGTTGCCGCTCTCCCGGAAGAAGAAAAGGACAAGACTGTATGACTTCTATGTTTGTCTCCGGTCATACTGTACCAA  
TAGGGTGTGGAGGGCCGGGAGAGGGCTACTGTGGCAAATGGGGATGTGAGACCACTGGACAGGCATACTGGAAGCCCTCA  
TCATCATGGGACCTAATTTCCCTTAAGCGAGGAAACACTCCTAAGGATCAGGGCCCCCTGTTATGATTCTCGGTCTCCAG  
TGGCGTCCAGGGTGCTACACCGGGGGGTGCGATGCAACCCCTAGTCTTAGAATTCAGTGACGCGGGTAAAAAGGCCAGCT  
GGGATGCCCCCAAAGTTTGGGGACTAAGACTCTATCGATCCACAAGGGCCGACCCGGTGACCCGGTTCTCTTTGACCCGC  
CAGGTCTCAATGTAGGACCCCGCTCCCCATTGGGCCTAATCCCGTGATCACTGACCAGCTACCCCCATCCCAACCCGT  
GCAGATCATGCTCCCCAGGCCTCCTCATCATCTCCTTCAGGCACGGTCTCTATGGTACCTGGGGCTCCCCCGCTTCTC  
AACAGCCTGGGACAGGAGACAGGCTACTAAATCTGGTAGACGGAGCCTACCAAGCACTCAACCTCACCAGTCTTGACAAA  
ACCCAAGAGTGCTGGTTGTGTCTGGTATCGGGACCCCCCTACTACGAAGGGGTTGCCGTCTTAGGTACCTACTCCAACCA  
TACCTCTGCCCCAGCTAACTGCTCCGTGGCCTCCCAACACAAGCTGACCCTGTCCGAAGTGACCGGACAGGGACTCTGCG  
TAGGAGCAGTTCCAAAACCCATCAGGCCCTGTGTAATACCACCCAGAAGACGAGCGACGGGTCTACTATCTGGCTGCT  
CCCCCGGGACCATCTGGGCTTGCAACACCGGGCTCACTCCCTGCCTATCTACTACTGTACTCAACCTCACCACCGATTA

CTGTGTCCTGGTTGAGCTCTGGCCAAAGGTGACCTACCACTCCCCTGGTTATGTTTATGGCCAGTTTGTAGAGAAAAACCA  
AATATAAAAGGGAGCCGGTGTCTAATACTCTGGCCCTGCTGTTGGGAGGACTTACTATGGGCGGCATAGCTGCAGGAGTA  
GGAACAGGGACTACAGCCCTAGTGGCCACCAACAATTTCGAGCAGCTCCAGGCAGCCATACATACAGACCTTGGGGCCTT  
AGAAAAATCAGTCAGTGCCCTAGAAAAGTCTCTGACCTCGTTGTCTGAGGTGGTCTACAGAACC GGAGAGGATTAGATC  
TGCTGTTCTCTAAAAGAAGGAGGATTATGTGCTGCCCTAAAAGAAGAATGCTGTTTCTACGCGGACCACACTGGCGTAGTA  
AGGGATAGCATGGCTAAGCTAAGAGAGAGACTAAACCAGAGACAAAAATTGTTTCAATCAGGACAAGGTGGTTTGTAGGG  
ACTGTTTAAACAGGTCCCCATGGTTCACGACCCTGATATCCACCATTATGGGCCCTCTGATAGTACTTTTATTAATCCTAC  
TCTTCGGACCCTGTATTCTCAACCGCTTGGTCCAGTTTGTAAAAGACAGAATTTCCGTGGTGCAGGCCCTGGTTCTGACC  
CAACAGTATCACCAACTCAAATCAATAGATCCAGAAGCAGTGGAATCACGTGAATAAAAAGATTTTATTTCAGTTTCCAGAA  
AGAGGGGGGAATGAAAGACCCACCATAAGGCTTAGCAAGCTAGCTGCAGTAACGCCATTTTGTCAAGGCATGAAAAAGTA  
CCAGAGCTGAGTTCTCAAAAGTTACAAGGAAGTTTCAGTTAAAGATTAAACAGTTAAAAATCAAGGCTGAATAATACTAGGA  
CAAGGGCCAAAAAGGGTATATCGGTGGTCAAGCGCCTGGGCCCGGCTCAGGGCCAAGAACCGATGGTACCCACCTGGGC  
CCCGGCTCAGGGCCAAGAACAGATGGTACCCAGATAAAGCGGAACCAGCAACAGTTTCTGAAAAAGTCCCACCTCAGTTT  
CAGGTTCCCCAATGACCAGGAAATACCCCAAGCCTTGATTTAAACTAACCACTCAGCTCGCTTCTCGCTTCTGTACCCA  
CGCTTTTTTGCTCCCCAGCCCCAGCCCTATAAAAAGGGTAAAAACCCACACTCGGCGCGCCAGTCTCTCCGATAGACTGAG  
TCGCCCCGGGTACCCGTGTTCCCAATAAAGCCTCTTGCTGATTACATCCGAATCGTGGTCTCGCTGATCCTTGGGAGGGTC  
TCCTCAGATTGATTGACCACCCACCTCGGGGGTCTTTCA

>Xmv9

TGAAAGACCCCCACCATAAGGCTTAGCAAGCTAGCTGCAGTAACGCCATTTTGTCAAGGCATGAAAAAGTACCAGAGCTGAG  
TTCTCAAAAGTTACAAGGAAGTTTCAGTTAAAGATTAAACAGTTAAAAATCAAGGCTGAATAATACTAGGACAAGGGCCAAA  
CAGGATATCGGTGGTCAAGCGCCTGGGCCCGGCTCAGGGCCAAGAACCGATGGTTCCACCTGGGCCCGGCTCAGGGC  
CAAGAACAGGTGGTACCCAGATGAAGCGGAACCAGCAACAGTTTCTGAAAAAGTCCCAGGTCCCCCAAATGACCAGGAAA  
TATCCCAAGCCTTGATTTGAACTAACCACTCAGCTCGCTTCTCGCTTCTGTGCCACGCTTTTTTGCTCCCCAGCCCCAGC  
CCTATAAAAAGGGTAAAAATTCCACACTCGGCGCGCCAGTCTCTCCGATAGACTGAGTCGCCCCGGGTACCCGTGTTCCCAA  
TAAAAGCCTCTTGCTGATTGCATCCGAATCGTGGACTCGCTGATTCTTGGGAGGGTCTCCTCAGATTGATTGACTACCCA  
CCTCGGGAGTCTTTCATTTGGAGGTCCCACCGAGATTAGGAGACCCCTGCCCAAGGACCACCGACCCCCGCGGGAGGTA  
AGCTGGCCAGCAGTCGTTTTCGTGTCTGTCTCCGTTTCCGTGCGTGTTTGTGCGGCACCTAATGTTTGCCTGCTGCTCTG  
TACTAGTTGGCTAAGTATCTGTATCTGCGAGTCGCGGAAGAAGTACGAGTTTCGTATTTCCGCGCGCAGCCCTGAG  
AGACGTCTCAGAGGCATCGGGGGCCATCTCTGTGGCCCAATCTGTATCTGAGAACCCGGCTCTTTGACCAAGGGATACGT  
GGTTCTGTTGGGCGGCGAGGGGCCGAAACGCTCCCCTCCCCATCTGAATTTTTGCTTTTCGGTTTTCCGCCGAAACCGCG  
CCGCGCGTCTTGTCTGTCTCTGTGTTGTTTTGTCAATTGTTTTGTCAATTGTCGTTTCGTTATTGTTTTAGACCGTTTTCTA  
AAAATATGGGGCAGACCGTAACCACTCCTTTGAGCCTGACCCTAGAACACTGGGGAGACGTCCAGCGCATTGCGTCCAAC  
CAGTCCGTGGACGTCAAGAAGAGACATTGGGTACCTTCTGCTCTGCCGAGTGGCCAACCTTTCGATGTGGGGTGGCCGCA  
AGATGGTACTTTTAATTTGGACATTATTTTACAGGTTAAATCTAAGGTGTTCTCTCCCGGTCCCCACGGACACCCGGATC  
AGGTCCCATACATTGTACCTGGGAGGCACCTTGCTATGACCCCCCTCCGTGGGTCAAACCGTTTTGTCTCTCCAAAACCC  
CCTCCTTTACCGACAGCTCCCGTCTCTCCGCGCGGTCTTCTGCGCAACCTCCGTCCCGATCTGCCCTTTACCTGCCCT  
TACCCCTCTATAAAGCCCCAACCTCCTAAGCCCCAGGTTCTCCCTGATGGCGGCGGACCTCTCATTGACCTTCTCACAG  
AGGACCCCCCGCCGTACGGAGCACAACCTTCTCTCTGCCAGAGGGAACGATGAAAAAGAGGCGGCCGCCACCTCCGAG  
GCTTCCCCCCCCCTCTCCCATGGTGTCTCGACTGCGGGGAAGGAGGGACCTCCCCGAGCGGACTCCACCTCCTCCCAGGC  
ATTCCCACTCCGCATGGGGGGAGATGGCCAGCTTCAGTATTGGCCGTTTTTCTCTTCGACTTATACAATTGAAAAATA  
ATAACCTTCTCTTTCTGAAGACCCAGGTAAATTGACGGCTTTGATTGAGTCCGTCTCATCAACCACAGCCACCTGG  
GACGACTGTCTAGCAGTTGTTGGGGACCCTGCTGACCGGAGAAGAAAAGCAGCGGTGCTCCTAGAGGCTAGAAAGGCAGT  
CCGGGGCAATGATGGACGCCCCACTCAGTTGCCTAATGAAGTCAATGCTGCTTTTCCCTTGAACGCCCCGATTGGGATC  
ACACCACTACAGAAGGTAGGAACCACCTAGTCTCTATCGCCAGTTGCTCTTAGCGGGTCTCCAAAACGCGGGCAGAAGC  
CCCACCAATTTGGCCAAGGTAAAAGGGATAAACCAGGGACCTAATGAGTCTCCCTCAGCCTTTTTAGAGAGACTCAAGGA  
GGCATATTGCAAGTACACTCCTTATGACCCTGAGGACCCAGGGCAAGAAACCAATGTGTCTATGTCAATTCATCTGGCAGT  
CTGCCCCAGATATCGGGCGAAAGTTAGAGCGGTTAGAAGATTTAAAGAGCAAGACATTAGGAGATTTAGTGAGGGAAGCT  
GAAAAGATCTTTAATAAGCGAGAAACCCCGGAAGAAAGAGAGGAACGTATCAGGAGAGAAACAGAGGAAAAGGAAGAAGC  
CCGTAGGGCAGAGGATGAGCAGAGAGAGAAAGAAAGGGACCGCAGGAGACATAGAGAGATGAGCAAGCTCTTGGCCACTG  
TGGTTAGTGAGACAGAGACAGGATAGACAGGGGGGAGAGCGAAGGAGGCCCAACTTGATAAGGACCAATGCGCCTACTGC  
AAAGAAAAGGGACACTGGGCTAAGGACTGCCCAAAGAAGCCACGAGGGCCCCGAGGACCGAGGCCCCAGACCTCCCTCCT  
GACCTTAGGTGACTAGGGAGGTGAGGTGACGAGCCCCCCCCCTGAACCCAGGATAACCTCAAAGTCGGGGGGCAACCCG  
TCACCTTCTGTTAGATACTGGGGCCCAACACTCCGTGCTGACCCAAAATCCTGGACCCCTAAGTGACAAGTCTGCCTGG  
GTCCAAGGGGCTACTGGAGGAAAGCGGTATCGCTGGACCACGGATCGCAAAGTACACCTAGCCACCGGTAAGGTACCCCA  
CTCTTTCTCCATGTACCAGACTGCCCCCTATCCTCTGCTAGGAAGAGACTTGCTGACTAAACTCAAAGCCCAGATCCACT  
TCGAGGGATCAGGAGCTCAGGTTGTGGGACCAATGGGACAGCCCCCTGCAAGTGCTGACCCTAAACATAGAGGATGAGTAT  
CGGCTACATGAGACCTCAACAGAGCCGGATGTTTCTCTAGGGTCCACCTGGCTTTCTGATTTTCCCAGGCCTGGGCGGA

AACTGGGGGCATGGGACTGGCAGTTTCGCCAAGCGCCTCTGATTATACCTCTGAAGGCAACCTCCACCCCGGTGTCCATAA  
AACAAATACCCCATGTACAGGAAGCCAGACTGGGGATCAAGCCCCACATACAGAGGCTGTTGGACCAGGGAATACTGGTA  
CCCTGCCAGTCCCCCTGGAATACACCCCTGCTACCCGTTAAGAAACCAGGGACTAACGATTATAGGCCTGTCCAGGATCT  
GAGAGAAGTCAACAAGCGGGTGGAAGACATCCACCCACCCGTGCCCAATCCTTACAACCTCTTAAGTGGGCTCCCACCAT  
CCCACCAGTGGTATACTGTGCTTGATTAAAGGATGCCTTTTTCTGCCTGAGACTCCACCCACCAGTCAGCCTCTCTTC  
GCCTTTGAGTGGAGAGATCCAGAAATGGGAATCTCAGGACAATTGACCTGGACCAGACTCCCACAGGGTTTCAAAAACAG  
TCCCACCCTGTTTGACGAGGCTCTGCACAGAGACCTAGCCGACTTCCGGATCCAGCACCCAGACTTGATCCTGTTGCAGT  
ACGTAGATGACTTACTACTGGCCGCGACTTCCGAGCCTGACTGCCAACAAGGTACTCGAGCCCTATTACAAACCTTAGGG  
GACCTCGGATACCGGGCCTCGGCCAAGAAAGCCCAACTTTGCCAGAAACAGGTCAAGTATCTGGGGTATCTTCTAAAAGA  
GGGTACAGAGATGGCTGACTGAGGCCAGAAAGAGACTGTGATGGGGCAGCCTACTCCGAAGACCCCTCGACAACCTAAGGG  
AGTTCCTAGGGACGGCAGGCTTCTGTGCCTCTGGATCCCTGGGTTTGCAGAAATGGCAGCCCCCTTGTATCCTCTTACC  
AAAACGGGGACTCTGTTTAATTGGGGCCAGACCAGCAAAAGGCCTATCAAGAAATCAAACAGGCCCTTCTAACTGCCCC  
CGCCCTGGGATTGCCAGATTTGACTAAACCCTTTGAACTCTTTGTGACGAGAGAAGCAGGGCTACGCCAAAGGCGTCTTAA  
CGCAAAAACCTGGGACCTTGGCGTCGGCCTGTGGCCTACCTGTCCAAAAGCTAGACCCAGTGGCAGCTGGGTGGCCCCCT  
TGCCTACGGATGGTAGCAGCCATTGCCGTTCTGATAAAAGATGCAGGCAAGCTAACTATGGGACAGCCGCTAGTCATCCT  
GGCCCCCATGCAGTAGAGGCACTGGTCAAGCAACCCCTGACCGCTGGCTATCCAATGCCCGCATGACCCACTACCAGG  
CAATGCTCCTAGACACTGACCGAGTTTCACTTCGGACCACTGGTGGCCCTCAATCCTGCCACCTTGCTCCCTCTACCGGAG  
AAAGGAGCCCCCATGATTGCCTCGAGGTCTTGGCTGAAACGCATGGAACCAGACCGGACCTCACCAGCCAGCCCATCCC  
AGACGCCGACCACACCTGGTATACCGATGGGAGCAGCTTTTTGCAAGAAGGACAGCGAAAAGCTGGGGCAGCAGTGACGA  
CAGAGACCGAGGTAATCTGGGCGAGGGCCCTGCCAGCTGGAACGTGAGCCAGCGAGCCGAAGTATCGCACTCACCCAA  
GCCCTGAAAATGGCAGAAGGTAAGAAGCTAAATGTTTATACTGATAGCCGCTATGCCTTCGCTACGGCCCATGTTTATGG  
GGAAATATATAGGAGACGGGGGTTGCTGACCTCAGAAGGCAAGGAAATCAAGAACAAAAGCGAGATCCTAGCCTTGCTGA  
AAGCCCTCTTTTTGCCAAAGAGGCTCAGTATTATCCATTGCCCGGGACACCAAAAAGGGAACAGTGCTGAAGCCAGGGGC  
AACCGAATGGCGGATCAAGCAGCCAGGGAGGCAGCCATGAGAGAGAGCGCAGAAACGTCCACGCTCTTAATAGAGGATTC  
GTCCCCGTATACTCCCAGCTACTTCCACTACACAGAGACTGACAGAAAAGACCTTCTGAGACTGGGAGCCGTATACGATG  
AGGACAAAAAGTATTGGGTCTTGCAGGGAAAACCTGTGATGCCTGACCAATTACCTTTGAGCTCTTAGATTCCCTACAC  
CGGCTCACCCTCAGCTCAGTATCAGAAGATGAAGGCACTCCTTGACCGGGAAGAGAGCCCCCTACTACATGTTAAATCGGGA  
TAAACTCTCCAGCAGCTAACGAATCCTGTACAGCTTGTGCTCAAGTAAATGCTAGTAAAGCCAAAATCGGAGCAAGGG  
TGCGAGCGCGGGGACACCGACCCGGCACCCATTGGGAAATCGATTTTACCAGGTTAAGCCAGGGCTGTATGGATATAAG  
TATCTCCTGGTGTTTTGTGGACACATTCTCTGGCTGGGTAGAAGCATTTCCAACCAAGCGTGAAACTGCCAGGGTTGTGAC  
CAAGAAGCTGCTTGAAGAAATTTTTCCAAGATTGCGGATGCCCCAGGTATTGGGGACAGATAATGGGCCTGCCTTCATCT  
CCCAGGTAAGTCAGACAGTGGCCGATTGTTGGGGATCGATTGGAAACTGCATTGTGCTTATAGACCCCAGAGTTCAGGT  
CAGGTAGAAAGAATGAATAGAACAAATCAAGGAGACTTTGACCAATTAACGCTTGCAGCTGGCACTAGAGACTGGGTACT  
CCTACTCCCCCTGGCCCTCTACCGAGCCCGGAATACTCCGGGCCACATGGACTCACTCCGTATGAAATTCTGTATGGGG  
CACCCACGCCCTTGTCAATTTTCTATGATCCTGAAATGTCAAAGTTAACTAATAGTCCCTCTCTCCAAGCTCACTTACAG  
GCCCTCCAAGCAGTACAACGAGAGGTCTGGAAGCCGCTGGCCGCTGCTTATCAGGACCAGCTGGATCAGCCAGTGATACC  
ACACCCCTTCCGTGTGCGTGACGCCGTGTGGGTGCGCCGGCATCAGACTAAGAACCTAGAACCTCGCTGGAAAGGACCCT  
ACACCGTCTCTACTAACACCCCCACCGCTCTCAAAGTAGACGGCATCTCTGCGTGGATACACGCCGCTCACGTAAAGGCG  
GCGACAACCTCCTCCGGCCGGAACAGCATGGAAGGTCCAGCGTTCTCAAATCCCTTAAAGATAAGACTAACCCGTGGGGC  
CCCCTGATAGTCATGGGGATCTTAGTGGGGGCAGGAGCCTCGGGACAACGTGACAGCCCTCACCAGGTCTTCAATGTTAC  
TTGGAAAGTTACCAACCTAATGACAGGACAAACAGCTAACGCCACCTCCCTTCTGGGGACGGTGACAGACACCTTCCCTA  
AACTATATTTTGACCTGTGTGATTTAGTAGGAGACTACTGGGACGACCCAGATGGAGTTGGTTGCCGCTCTCCCGGAAGA  
AGAAAAAGGACAAGACTGTATGACTTCTATGTTTGCCCGGTACACTGTACCAATAGGGTGTGGAGGGCCGGGAGAGGG  
CTACTGTGGCAAATGGGGATGTGAGACCACTGGACAGGCATACTGGAAGCCCTCATCATCATGGGACCTAATTTCCCTTA  
AGCGAGGAAACACTCCTAAGGATCAGGGCCCCCTGTTACGATTCTCGGTCTCCAGTGGCGTCCAGGGTGCTACACCGGG  
GGTCGATGCAACCCCTAGTCTTAGAATTCACTGACGCGGGTAAAAAGGCCAGCTGGGATGCCCCCAAAGTTTGGGGACT  
AAGACTCTATCGATCCACAAGGGCCGACCCGGTGACCCGGTTCTCTTTGACCCGCCAGGTCTCAATGTAGGACCCCGCG  
TCCCCATTGGGCCTAATCCCGTGATCACTGACCAGCTACCCCATCCCAACCCGTGCAGATCATGCTCCCCAGGCCTCCT  
CATCATCCTCCTCCAGGCACGGTCTCTATGGTACCTGGGGCTCCCCCGCCTTCTCAACAGCCTGGGACAGGAGACAGGCT  
ACTAAGTCTGGTAGACGGAGCCTACCAAGCACTCAACCTCACCAGTCTTGACAAAACCTCAAGAGTGCTGGTTGTGTCTGG  
TATCGGGACCCCCCTACTACGAAGGGGTTGCCGTCTTAGGTACCTACTCCAACCATACTCTGCCCCAGCTAACTGCTCC  
GTGGCCTCCCAACACAAGCTGACCCTGTCCGAAGTGACCGGACAGGGACTCTGCGTAGGAGCAGTTCCCAAAACCCATCA  
GGCCCTGTGTAATACCAACCAGAAGACGAACGACGGGTCTACTATCTGGCTGCTCCCGCCGGGACCATCTGGGCTTGCA  
ACACCGGGCTCACTCCCTGCCTATCTACTACTGTACTTAACCTCACCACCGATTACTGTGTCTCTGGTTGAGCTCTGGCCA  
AAGGTGACCTACCACTCCCCTGGTTATGTGTATGGCCAGTTTGAGAGAAAAACCAAGTATCAAAGAGAGCCGGTGTCTATT  
AACTCTGGCCCTACTGTTGGGAGGACTTACTATGGGCGGCATAGCTGCAGGAGTAGGAACAGGGACTACAGCCCTAGTGG  
CCACCAACAATTCGAGCAGCTCCAGGCAGCCATACATACAGACCTTGGGGCCTTAGAAAAATCAGTCAGTGCCCTAGAA

AAGTCTCTGACCTCGTTGTCTGAAGTGGTCCTACAGAACCGGAGAGGATTAGATCTGCTGTTCCCTAAAAGAAGGAGGATT  
ATGTGCTGCCCTAAAAGAAGAATGCTGTTTCTACGCGGACCACACTGGCGTAGTAAGGGATAGCATGGCTAAGCTAAGAG  
AGAGACTAAACCAGAGACAAAAATTGTTCTGAATCAGGACAAGGGTGGTTTGAGGGACTGTTTAACAGGTCCCCATGGTTC  
ACGACCTTGATATCCACCATTATGGGCCCCCTTGATAATACTTTTATTAATCCTACTCCTCGGACCCTGTATTCTCAACCG  
ATTGGTCCAGTTTGTAAGACAGAATTCGGTGGTGCAGGCCCTGGTTCAGACCAACAGTATCACCAACTCAAATCAA  
TAGAGCCAGAAGCAGTGGAATCAGTGAATAAAAGATTTTATTCAGTTTCCAGAAAGAGGGGGGAATGAAAGACCCACC  
ATAAGGCTTAGCAAGCTAGCTGCAGTAACGCCATTTTGCAAGGCATGAAAAAGTACCAGAGCTGAGTTCTCAAAGTTAC  
AAGGAAGTTCAGTTAAAGATTAACAGTTAAAAATCAAGGCTGAATAATACTAGGACAAGGGCCAAACAGGATATCGGTGG  
TCAAGCGCTGGGCCCCGGCTCAGGGCCAAGAACCGATGGTTCACCTGGGCCCCGGCTCAGGGCCAAGAACAGGTGGT  
ACCCAGATGAAGCGGAACCAGCAACAGTTTCTGAAAAAGTCCCAGGTCCCCCAAATGACCAGGAAATATCCCAAGCCTTG  
ATTTGAACTAACCCTCAGCTCGCTTCTCGCTTCTGTGCCACGCTTTTGTCTCCCAGCCCCAGCCCTATAAAAAGGGT  
AAAAATTCCACACTCGGCGCGCCAGTCCTCCGATAGACTGAGTCGCCCCGGGTACCCGTGTTCCCAATAAAAGCCTCTTGC  
TGATTGCATCCGAATCGTGGACTCGCTGATTCTTGGGAGGGTCTCCTCAGATTGATTGACTACCCACCTCGGGAGTCTTT  
CA
