# Supplementary material for: Role of APOBEC3 in Genetic Diversity among Endogenous Murine Leukemia Viruses
Source: PLoS Genet. 2007 Oct 26;3(10):e183. doi: 10.1371/journal.pgen.0030183 (PMC2041998; doi:10.1371/journal.pgen.0030183)
Supplement: Figure S3 — (142 KB PDF) [file pgen.0030183.sg003.pdf]

## Pmv (concatenated *gag*, *pol* and *env*)

|          |                                                                                     |
|----------|-------------------------------------------------------------------------------------|
| PMV_CONS | ATGGGACAGACCGTAACCTACCCCTCTGAGTTTAACTTGCAGCACTGGGGAGATGTCCAGCGCATTGCATCCAACCACTGTC  |
| Pmv1     | atgggacagaccgtaactacccctctgagtttaaccttgcagcactggggagatgtccagcgcatcattgcatccaaccagtc |
| Pmv10    | atgggacagaccgtaactacccctctgagtttaaccttgcagcactggggagatgtccagcgcatcattgcatccaaccagtc |
| Pmv11    | atgggacagaccgtaactacccctctgagtttaaccttgcagcactggggagatgtccagcgcatcattgcatccaaccagtc |
| Pmv12    | atgggacagaccgtaactacccctctgagtttaaccttgcagcactggggagatgtccagcgcatcattgcatccaaccagtc |
| Pmv13    | atgggacagaccgtaactacccctctgagtttaaccttgcagcactggggagatgtccagcgcatcattgcatccaaccagtc |
| Pmv14    | atgggacagaccgtaactacccctctgagtttaaccttgcagcactggggagatgtccagcgcatcattgcatccaaccagtc |
| Pmv15    | atgggacagaccgtaactacccctctgagtttaaccttgcagcactggggagatgtccagcgcatcattgcatccaaccagtc |
| Pmv16    | atgggacagaccgtaactacccctctgagtttaaccttgcagcactggggagatgtccagcgcatcattgcatccaaccagtc |
| Pmv17    | atgggacagaccgtaactacccctctgagtttaaccttgcagcactggggagatgtccagcgcatcattgcatccaaccagtc |
| Pmv18    | atgggacagaccgtaactacccctctgagtttaaccttgcagcactggggagatgtccagcgcatcattgcatccaaccagtc |
| Pmv19    | atgggacagaccgtaactacccctctgagtttaaccttgcagcactggggagatgtccagcgcatcattgcatccaaccagtc |
| Pmv2     | atgggacagaccgtaactacccctctgagtttaaccttgcagcactggggagatgtccagcgcatcattgcatccaaccagtc |
| Pmv20    | atgggacagaccgtaactacccctctgagtttaaccttgcagcactggggGgatgtccagcgcatcattgcatccaaccagtc |
| Pmv21    | atgggacagaccgtaactacccctctgagtttaaccttgcagcactggggGgCtgtccagcgcatcattgcatccaaccagtc |
| Pmv22    | atgggacagaccgtaactacccctctgagtttaaccttgcagcactggggagatgtccagcgcatcattgcatccaaccagtc |
| Pmv23    | atgggacagaccgtaactacccctctgagtttaaccttgcagcactggggagatgtccagcgcatcattgcatccaaccagtc |
| Pmv24    | atgggacagaccgtaactacccctctgagtttaaccttgcagcactggggGgatgtccagcgcatcattgcatccaaccagtc |
| Pmv4     | atgggacagaccgtaactacccctctgagtttaaccttgcagcactggggagatgtccagcgcatcattgcatccaaccagtc |
| Pmv5     | atgggacagaccgtaactacccctctgagtttaaccttgcagcactggggagatgtccagcgcatcattgcatccaaccagtc |
| Pmv6     | atgggacagaccgtaactacccctctgagtttaaccttgcagcactggggagatgtccagcgcatcattgcatccaaccagtc |
| Pmv7     | atgggacagaccgtaactacccctctgagtttaaccttgcagcactggggagatgtccagcgcatcattgcatccaaccagtc |
| Pmv8     | atgggacagaccgtaactacccctctgagtttaaccttgcagcactggggagatgtccagcgcatcattgcatccaaccagtc |
| Pmv9     | atgggacagaccgtaactacccctctgagtttaaccttgcagcactggggagatgtccagcgcatcattgcatccaaccagtc |

|          |                                                                                  |
|----------|----------------------------------------------------------------------------------|
| PMV_CONS | TGTGGATGTTCAGGAAGAGGCGCTGGATTACCTTCTGTTCGCTGAATGGCCAACCTTCAATGTGGGATGGCCTCAGGATG |
| Pmv1     | tgtggatgtcAgaagaggcgctggattaccttctgttccgctgaatggccaactttcaatgtgggatggcctcaggatg  |
| Pmv10    | tgtggatgtcaggaagaggcgctggattaccttctgttccgctgaatggccaactttcaatgtgggatggcctcaggatg |
| Pmv11    | tgtggatgtcAgaagaggcgctggattaccttctgttccgctgaatggccaactttcaatgtgggatggcctcaggatg  |
| Pmv12    | tgtggatgtcaggaagaggcgctAgattaccttctgttccgctGaatggccaactttcaatgtgggatggcctcaggatg |
| Pmv13    | tgtggatgtcaggaagaggcgctggattaccttctgttccgctgaatggccaactttcaatgtgggatggcctcaggatg |
| Pmv14    | tgtggatgtcaggaagaggcgctggattaccttctgttccgctgaatggccaactttcaatgtgggatggcctcaggatg |
| Pmv15    | tgtggatgtcaggaagaggcgctggattaccttctgttccgctgaatggccaactttcaatgtgggatggcctcaggatg |
| Pmv16    | tgtggatgtcAgaagaggcgctAgattaccttctgttccgctgaatggccaactttcaatgtgggatggcctcaggatg  |
| Pmv17    | tgtggatgtcaggaagaggcgctggattaccttctgttccgctgaatggccaactttcaatgtgggatggcctcaggatg |
| Pmv18    | tgtggatgtcaggaagaggcgctggattaccttctgttccgctgaatggccaactttcaatgtgggatggcctcaggatg |
| Pmv19    | tgtggatgtcaggaagaggcgctggattaccttctgttccgctgaatggccaactttcaatgtgggatggcctcaggatg |
| Pmv2     | tgtggatgtcaggaagaggcgctggattaccttctgttccgctgaatggccaactttcaatgtgggatggcctcaggatg |
| Pmv20    | tgtggatgtcaggaagaggcgctggattaccttctgttccgctgaatggccaactttcaatgtgggatggcctcaggatg |
| Pmv21    | tgtggatgtcaggaagaggcgctggattaccttctgttccgctgaatggccaactttcaatgtgggatggcctcaggatg |
| Pmv22    | tgtggatgtcaggaagaggcgctggattaccttctgttccgctgaatggccaactttcaatgtgggatggcctcaggatg |
| Pmv23    | tgtggatgtcaggaagaggcgctggattaccttctgttccgctgaatggccaactttcaatgtgggatggcctcaggatg |
| Pmv24    | tgtggatgtcaggaagaggcgctggattaccttctgttccgctgaatggccaactttcaatgtgggatggcctcaggatg |
| Pmv4     | tgtggatgtcaggaagaggcgctggattaccttctgttccgctgaatggccaaTtttcaatgtgggatggcctcaggatg |
| Pmv5     | tgtggatgtcaggaagaggcgctggattaccttctgttccgctgaatggccaactttcaatgtgggatggcctcaggatg |
| Pmv6     | tgtggatgtcaggaagaggcgctggattaccttctgttccgctgaatggccaactttcaatgtgggatggcctcaggatg |
| Pmv7     | tgtggatgtcaggaagaggcgctggattaccttctgttccgctgaatggccaactttcaatgtgggatggcctcaggatg |
| Pmv8     | tgtggatgtcAgaagaggcgctggattaccttctgttccgctgaatggccaactttcaatgtgggatggcctcaggatg  |
| Pmv9     | tgtggatgtcaggaagaggcgctggattaccttctgttccgctgaatggccaactttcaatgtgggatggcctcaggatg |







| PMV_CONS | TTCCTACTCCGATGGGGGGAGATGGCCAGCTTCAGTATTGGCCGTTTTCTCTTCGGATTTATACAATGGAAAAATAAT  |
|----------|---------------------------------------------------------------------------------|
| Pmv1     | tccactccgcatggggggagatggccagcttcagtat tggccggttttctcttcggatttatacaatggaaaaataat |
| Pmv10    | tccactccgcatggggggagatggccagcttcagtat tggccggttttctcttcggatttatacaatggaaaaataat |
| Pmv11    | tccactccgcatggggggagatggccagcttcagtat tggccggttttctcttcggatttatacaatggaaaaataat |
| Pmv12    | tccactccgcatggggggagatggccagcttcagtat tggccggttttctcttcggatttatacaatggaaaaataat |
| Pmv13    | tccactccgcatggggggagatggccagcttcagtat tggccggttttctcttcggatttatacaatggaaaaataat |
| Pmv14    | tccactccgcatggggggagatggccagcttcagtat tggccggttttctcttcggatttatacaatggaaaaataat |
| Pmv15    | tccactccgcatggggggagatggccagcttcagtat tggccggttttctcttcggatttatacaatggaaaaataat |
| Pmv16    | tccactccgcatggggggagatggccagcttcagtat tggccggttttctcttcggatttatacaatggaaaaataat |
| Pmv17    | tccactccgcatggggggagatggccagcttcagtat tggccggttttctcttcggatttatacaatggaaaaataat |
| Pmv18    | tccactccgcatggggggagatggccagcttcagtat tggccggttttctcttcggatttatacaatggaaaaataat |
| Pmv19    | tccactccgcatggggggagatggccagcttcagtat tggccggttttctcttcggatttatacaatggaaaaataat |
| Pmv2     | tccactccgcatggggggagatggccagcttcagtat tggccggttttctcttcggatttatacaatggaaaaataat |
| Pmv20    | tccactccgcatggggggagatggccagcttcagtat tggccggttttctcttcggatttatacaatggaaaaataat |
| Pmv21    | tccactccgcatggggggagatggccagcttcagtat tggccggttttctcttcggatttatacaatggaaaaataat |
| Pmv22    | tccactccgcatggggggagatggccagcttcagtat tggccggttttctcttcggatttatacaatggaaaaataat |
| Pmv23    | tccactccgcatggggggagatggccagcttcagtat tggccggttttctcttcggatttatacaatggaaaaataat |
| Pmv24    | tccactccgcatggggggagatggccagcttcagtat tggccggttttctcttcggatttatacaatggaaaaataat |
| Pmv4     | tccactccgcatggggggagatggccagcttcagtat tggccggttttctcttcggatttatacaatggaaaaataat |
| Pmv5     | tccactccgcatggggggagatggccagcttcagtat tggccggttttctcttcggatttatacaatggaaaaataat |
| Pmv6     | tccactccgcatggggggagatggccagcttcagtat tggccggttttctcttcggatttatacaatggaaaaataat |
| Pmv7     | tccactccgcatggggggagatggccagcttcagtat tggccggttttctcttcggatttatacaatggaaaaataat |
| Pmv8     | tccactccgcatggggggagatggccagcttcagtat tggccggttttctcttcggatttatacaatggaaaaataat |
| Pmv9     | tccactccgcatggggggagatggccagcttcagtat tggccggttttctcttcggatttatacaatggaaaaataat |











|          |                                                                                    |
|----------|------------------------------------------------------------------------------------|
| PMV_CONS | CCTTAGGTGACGCTCAGGTTATGGGACCAATGGGACTGCCCCTGCAAGTGCTGACCCTAAACATAGAAGATGAGTATCGG   |
| Pmv1     | ccttaggtgacgctcagggttatgggaccaatgggactgcccctgcaagtgctgaccctaaacatagaagatgagtatcgg  |
| Pmv10    | ccttaggtgacgctcagggttatgggaccaatgggactgcccctgcaagtgctgaccctaaacatagaagatgagtatcgg  |
| Pmv11    | ccttaggtgacgctcagggttatgggaccaatgggactgcccctgcaagtgctgaccctaaacatagaagatgagtatcgg  |
| Pmv12    | ccttaggtgacgctcagggttatgggaccaatgggactgcccctgcaagtgctgaccctaaacatagaagatgagtatcgg  |
| Pmv13    | ccttaggtgacgctcagggttatgggaccaatgggactgcccctgcaagtgctgaccctaaacatagaagatgagtatcgg  |
| Pmv14    | ccttaggtgacgctcagggttatgggaccaatgggactgcccctgcaagtgctgaccctaaacatagaagatgagtatcgg  |
| Pmv15    | ccttaggtgacgctcagggttatgggaccaatgggactgcccctgcaagtgctgaccctaaacatagaagatgagtatcgg  |
| Pmv16    | ccttaggtgacgctcagggttatgggaccaatgggactgcccctgcaagtgctgaccctaaacatagaagatgagtatcgg  |
| Pmv17    | ccttaggtgac-----                                                                   |
| Pmv18    | ccttaggtgacgctcagggttatgggaccaatgggactgcccctgcaagtgctgaccctaaacatagaagatgagtatcgg  |
| Pmv19    | ccttaggtgacgctcagggttatgggaccaatgggactgcccctgcaagtgctgaccctaaacatagaagatgagtatcgg  |
| Pmv2     | ccttaggtgacgctcagggttatgggaccaatgggactgcccctgcaagtgctgaccctaaacatagaagatgagtatcgg  |
| Pmv20    | ccttaggtgacgctcagggttatgggaccaatgggactgcccctgcaagtgctgaccctaaacatagaagatgagtatcgg  |
| Pmv21    | ccttaggtgacgctcagggttatgggaccaatgggactgcccctgcaagtgctgaccctaaacatagaagatgagtatcgg  |
| Pmv22    | ccttaggtgacgctcagggttatgggaccaatgggactgcccctgcaagtgctgaccctaaacatagaagatgagtatcgg  |
| Pmv23    | ccttaggtgacgctcagggttatgggaccaatgggactgcccctgcaagtgctgaccctaaacatagaagatgagtatcgg  |
| Pmv24    | ccttaggtgacgctcagggttatgggaccaatgggactgcccctgcaagtgctgaccctaaacatagaagatgagtatcgg  |
| Pmv4     | ccttaggtgacgctcagggttatgggaccaatgaggactgcccctgcaagtgctgaccctaaacatagaagatgagtatcgg |
| Pmv5     | ccttaggtgacgctcagggttatgggaccaatgggactgcccctgcaagtgctgaccctaaacatagaagatgagtatcgg  |
| Pmv6     | ccttaggtgacgctcagggttatgggaccaatgggactgcccctgcaagtgctgaccctaaacatagaagatgagtatcgg  |
| Pmv7     | ccttaggtgacgctcagggttatgggaccaatgggactgcccctgcaagtgctgaccctaaacatagaagatgagtatcgg  |
| Pmv8     | ccttaggtgacgctcagggttatgggaccaatgggactgcccctgcaagtgctgaccctaaacatagaagatgagtatcgg  |
| Pmv9     | ccttaggtgacgctcagggtgtgggaccaatgggacagcccctgcaagtgctgaccctaaacatagaagatgagtatcgg   |

| PMV_CONS | CTACATGAGACCTCAAAGAGCCGGATGTTTCTCTAGGGTCCACCTGGCTTTCTGATTTTCCCAGGCTGGGCGGAAAC     |
|----------|-----------------------------------------------------------------------------------|
| Pmv1     | ctacatgagacctcaaagagccggatgtttctctaggggtccacctggctttctgattttccccaggctctgggcggaaac |
| Pmv10    | ctacatgagacctcaaagagccggatgtttctctaggggtccacctggctttctgattttccccaggctctgggcggaaac |
| Pmv11    | ctacatgagacctcaaagagccggatgtttctctaggggtccacctggctttctgattttccccaggctctgggcggaaac |
| Pmv12    | ctacatgagacctcaaagagccggatgtttctctaggggtccacctggctttctgattttccccaggctctgggcggaaac |
| Pmv13    | ctacatgagacctcaaagagccggatgtttctctaggggtccacctggctttctgattttccccaggctctgggcggaaac |
| Pmv14    | ctacatgagacctcaaagagccggatgtttctctaggggtccacctggctttctgattttccccaggctctgggcggaaac |
| Pmv15    | ctacatgagacctcaaagagccggatgtttctctaggggtccacctggctttctgattttccccaggctctgggcggaaac |
| Pmv16    | ctacatgagacctcaaagagccggatgtttctctaggggtccacctggctttctgattttccccaggctctgggcggaaac |
| Pmv17    | -----                                                                             |
| Pmv18    | ctacatgagacctcaaagagccggatgtttctctaggggtccacctggctttctgattttccccaggctctgggcggaaac |
| Pmv19    | ctacatgagacctcaaagagccggatgtttctctaggggtccacctggctttctgattttccccaggctctgggcggaaac |
| Pmv2     | ctacatgagacctcaaagagccggatgtttctctaggggtccacctggctttctgattttccccaggctctgggcggaaac |
| Pmv20    | ctacatgagacctcaaagagccggatgtttctctaggggtccacctggctttctgattttccccaggctctgggcggaaac |
| Pmv21    | ctacatgagacctcaaagagccggatgtttctctaggggtccacctggctttctgattttccccaggctctgggcggaaac |
| Pmv22    | ctacatgagacctcaaagagccggatgtttctctaggggtccacctggctttctgattttccccaggctctgggcggaaac |
| Pmv23    | ctacatgagacctcaaagagccggatgtttctctaggggtccacctggctttctgattttccccaggctctgggcggaaac |
| Pmv24    | ctacatgagacctcaaagagccggatgtttctctaggggtccacctggctttctgattttccccaggctctgggcggaaac |
| Pmv4     | ctacatgagacctcaaagagccggatgtttctctaggggtccacctggctttctgattttccccaggctctgggcggaaac |
| Pmv5     | ctacatgagacctcaaagagccggatgtttctctaggggtccacctggctttctgattttccccaggctctgggcggaaac |
| Pmv6     | ctacatgagacctcaaagagccggatgtttctctaggggtccacctggctttctgattttccccaggctctgggcggaaac |
| Pmv7     | ctacatgagacctcaaagagccggatgtttctctaggggtccacctggctttctgattttccccaggctctgggcggaaac |
| Pmv8     | ctacatgagacctcaaagagccggatgtttctctaggggtccacctggctttctgattttccccaggctctgggcggaaac |
| Pmv9     | ctacatgagacctcaaagagccggatgtttctctaggggtccacctggctttctgattttccccaggctctgggcggaaac |



|          |                                                                                     |
|----------|-------------------------------------------------------------------------------------|
| PMV_CONS | AGAAGTCAACAAGCGGGTGGGAAGACATCCACCCACCGTGCCCAACCCCTTACAACCTCTTGAGCGGGCTCCACCGTCCC    |
| Pmv1     | agaagtcaacaagcgggtggaagacatccaccccacggtgcccaccccttacaacctcttgagcgggctcccaccgtccc    |
| Pmv10    | agaagtcaacaagcgggtggaagacatccaccccacggtgcccaccccttacaacctcttgagcgggctcccaccgtccc    |
| Pmv11    | agaagtcaacaagcgggtggaagacatccaccccacggtgcccaccccttacaacctcttgagcgggctcccaccgtccc    |
| Pmv12    | agaagtcaacaagcgggtggaagacatccaccccacggtgcccaccccttacaacctcttgagcgggctcccaccgtccc    |
| Pmv13    | agaagtcaacaagcgggtggaagacatccaccccacggtgcccaccccttacaacctcttgagcgggctcccaccgtccc    |
| Pmv14    | agaagtcaacaagcgggtggaagacatccaccccacggtgcccaccccttacaacctcttgagcgggctcccaccgtccc    |
| Pmv15    | agaagtcaacaagcgggtggaagacatccaccccacggtgcccaccccttacaacctcttgagcgggctcccaccgtccc    |
| Pmv16    | agaagtcaacaagcgggtggaagacatccaccccacggtgcccaccccttacaacctcttgagcgggctcccaccgtccc    |
| Pmv17    | -----                                                                               |
| Pmv18    | agaagtcaacaagcgggtggaagacatccaccccacggtgcccaccccttacaacctcttgagcgggctcccaccgtccc    |
| Pmv19    | agaagtcaacaagcgggtggaagacatccaccccacggtgcccaccccttacaacctcttgagcgggctcccaccgtccc    |
| Pmv2     | agaagtcaacaagcgggtggaagacatccaccccacggtgcccaccccttacaacctcttgagcgggctcccaccgtccc    |
| Pmv20    | agaagtcaacaagcgggtggaagacatccaccccacggtgcccaccccttacaacctcttgagcgggctcccaccgtccc    |
| Pmv21    | agaagtcaacaagcgggtggaagacatccaccccacggtgcccaccccttacaacctcttgagcgggctcccaccgtccc    |
| Pmv22    | agaagtcaacaagcgggtggaagacatccaccccacggtgcccaccccttacaacctcttgagcgggctcccaccgtccc    |
| Pmv23    | agaagtcaacaagcgggtggaagacatccaccccacggtgcccaccccttacaacctcttgagcgggctcccaccgtccc    |
| Pmv24    | agaagtcaacaagcgggtggaagacatccaccccacggtgcccaccccttacaacctcttgagcgggctcccaccgtccc    |
| Pmv4     | AaagtcaacaagcgggtAAaagacatccaccccacggtgcccaccccttacaacctcttgagcgggctcccaccgtccc     |
| Pmv5     | agaagtcaacaagcgggtggaagacatccaccccacggtgcccaccccttacaacctcttgagcgggctcccaccgtccc    |
| Pmv6     | agaagtcaacaagcgggtggaagacatccaccccacggtgcccaccccttacaacctcttgagcgggctcccaccgtccc    |
| Pmv7     | agaagtcaacaagcgggtggaagacatccaccccacggtgcccaccccttacaacctcttgagcgggctcccaccgtccc    |
| Pmv8     | agaagtcaacaagcgggtggaagacatccaccccacggtgcccaccccttacaacctcttgagcgggctcccaccgtccc    |
| Pmv9     | agaagtcaacaagcgggtggaagacatccaccccacggtgcccaccccttacaacctcttgagcgggctcccaccgtccc    |
| PMV_CONS | ACCAGTGGTACACTGTGCTTGATTTAAAGGATGCCTTTTTCTGCCTGAGACTCCACCCACCAAGTCAGCCTCTCTTCGCC    |
| Pmv1     | accagtgggtacactgtgcttgatttaaaggatgcctttttctgctgagactccaccccaccagtgcgctctcttcgcc     |
| Pmv10    | accagtgggtacactgtgcttgatttaaaggatgcctttttctgctgagactccaccccaccagtgcgctctcttcgcc     |
| Pmv11    | accagtgggtacactgtgcttgatttaaaggatgcctttttctgctgagactccaccccaccagtgcgctctcttcgcc     |
| Pmv12    | accagtgggtacactgtgcttgatttaaaggatgcctttttctgctgagactccaccccaccagtgcgctctcttcgcc     |
| Pmv13    | accagtgggtacactgtgcttgatttaaaggatgcctttttctgctgagactccaccccaccagtgcgctctcttcgcc     |
| Pmv14    | accagtgggtacactgtgcttgatttaaaggatgcctttttctgctgagactccaccccaccagtgcgctctcttcgcc     |
| Pmv15    | accagtgggtacactgtgcttgatttaaaggatgcctttttctgctgagactccaccccaccagtgcgctctcttcgcc     |
| Pmv16    | accagtgggtacactgtgcttgatttaaaggatgcctttttctgctgagactccaccccaccagCagcctctcttcgcc     |
| Pmv17    | -----                                                                               |
| Pmv18    | accagtgggtacactgtgcttgatttaaaggatgcctttttctgctgagactccaccccaccagtgcgctctcttcgccAacc |
| Pmv19    | accagtgggtacactgtgcttgatttaaaggatgcctttttctgctgagactccaccccaccagtgcgctctcttcgcc     |
| Pmv2     | accagtgggtacactgtgcttgatttaaaggatgcctttttctgctgagactccaccccaccagtgcgctctcttcgcc     |
| Pmv20    | accagtgggtacactgtgcttgatttaaaggatgcctttttctgctgagactccaccccaccagtgcgctctcttcgcc     |
| Pmv21    | accagtgggtacactgtgcttgatttaaaggatgcctttttctgctgagactccaccccaccagtgcgctctcttcgcc     |
| Pmv22    | accagtgggtacactgtgcttgatttaaaggatgcctttttctgctgagactccaccccaccagtgcgctctcttcgcc     |
| Pmv23    | accagtgggtacactgtgcttgatttaaaggatgcctttttctgctgagactccaccccaccagtgcgctctcttcgcc     |
| Pmv24    | accagtgggtacactgtgcttgatttaaaggatgcctttttctgctgagactccaccccaccagtgcgctctcttcgcc     |
| Pmv4     | accagtAgtacactgtgcttAatttaaaggatgcctttttctgctgagactccaccccaccagtgcgctctcttcgcc      |
| Pmv5     | accagtgggtacactgtgcttgatttaaaggatgcctttttctgctgagactccaccccaccagtgcgctctcttcgcc     |
| Pmv6     | accagtgggtacactgtgcttgatttaaaggatgcctttttctgctgagactccaccccaccagtgcgctctcttcgcc     |
| Pmv7     | accagtgggtacactgtgcttgatttaaaggatgcctttttctgctgagactccaccccaccagtgcgctctcttcgcc     |
| Pmv8     | accagtgggtacactgtgcttgatttaaaggatgcctttttctgctgagactccaccccaccagCagcctctcttcgcc     |
| Pmv9     | accagtgggtacactgtgcttgatCttaaaggatgcctttttctgctgagactccaccccaccagtgcgctctcttcgcc    |

|          |                                                                                  |
|----------|----------------------------------------------------------------------------------|
| PMV_CONS | TTTGAGTGGAGAGATCCAGAGATGGGAATCTCAGGACAATTGACCTGGACCAGACTCCCACAGGGTTTCAAAAACAGTCC |
| Pmv1     | tttgagtggagagatccagagatgggaatctcaggacaattgacctggaccagactcccacagggtttcaaaaacagtcc |
| Pmv10    | tttgagtggagagatccagagatgggaatctcaggacaattgacctggaccagactcccacagggtttcaaaaacagtcc |
| Pmv11    | tttgagtggagagatccagagatgggaatctcaggacaattgacctggaccagactcccacagggtttcaaaaacagtcc |
| Pmv12    | tttgagtggagagatccagagatgggaatctcaggacaattgacctggaccagactcccacagggtttcaaaaacagtcc |
| Pmv13    | tttgagtggagagatccagagatgggaatctcaggacaattgacctggaccagactcccacagggtttcaaaaacagtcc |
| Pmv14    | tttgagtggagagatccagagatgggaatctcaggacaattgacctggaccagactcccacagggtttcaaaaacagtcc |
| Pmv15    | tttgagtggagagatccagagatgggaatctcaggacaattgacctggaccagactcccacagggtttcaaaaacagtcc |
| Pmv16    | tttgagtggagagatccagagatgggaatctcaggacaattgacctggaccagactcccacagggtttcaaaaacagtcc |
| Pmv17    | -----                                                                            |
| Pmv18    | tttgagtggagagatccagagatgAgaatctcaggacaattgacctggaccagactcccacagggtttcaaaaacagtcc |
| Pmv19    | tttgagtggagagatccagagatgggaatctcaggacaattgacctggaccagactcccacagggtttcaaaaacagtcc |
| Pmv2     | tttgagtAgagagatccagagatgggaatctcaggacaattgacctggaccagactcccacagggtttcaaaaacagtcc |
| Pmv20    | tttgagtggagagatccagagatgggaatctcaggacaattgacctggaccagactcccacagggtttcaaaaacagtcc |
| Pmv21    | tttgagtggagagatccagagatgggaatctcaggacaattgacctggaccagactcccacagggtttcaaaaacagtcc |
| Pmv22    | tttgagtggagagatccagagatgggaatctcaggacaattgacctggaccagactcccacagggtttcaaaaacagtcc |
| Pmv23    | tttgagtggagagatccagagatgggaatctcaggacaattgacctggaccagactcccacagggtttcaaaaacagtcc |
| Pmv24    | tttgagtggagagatccagagatgggaatctcaggacaattgacctggaccagactcccacagggtttcaaaaacagtcc |
| Pmv      | tttgagtggagagatccagagatgggaatctcaggacaattgacctggaccagactcccacagggtttcaaaaacagtcc |
| Pmv5     | tttgagtggagagatccagagatgggaatctcaggacaattgacctggaccagactcccacagggtttcaaaaacagtcc |
| Pmv6     | tttgagtggagagatccagagatgggaatctcaggacaattgacctggaccagactcccacagggtttcaaaaacagtcc |
| Pmv7     | tttgagtggagagatccagagatgggaatctcaggacaattgacctggaccagactcccacagggtttcaaaaacagtcc |
| Pmv8     | tttgagtggagagatccagagatgggaatctcaggacaattgacctggaccagactcccacagggtttcaaaaacagtcc |
| Pmv9     | tttgagtggagagaCccagagatgggaatctcaggacaattAacctggaccagactcccacagggtttcaaaaacagtcc |

  

|          |                                                                                   |
|----------|-----------------------------------------------------------------------------------|
| PMV_CONS | CACCTGTTTGTATGAGGCACCTGCACAGAGACCTAGCAGACTTCCGGATCCAGCACCCAGACTTGATCCTGCTACAGTACG |
| Pmv1     | cacctgtttgatgaggcactgcacagagacctagcagacttccggatccagcaccagacttgatcctgctacagtacg    |
| Pmv10    | cacctgtttgatgaggcactgcacagagacctagcagacttccggatccagcaccagacttgatcctgctacagtacg    |
| Pmv11    | cacctgtttgatgaggcactgcacagagacctagcagacttccggatccagcaccagacttgatcctgctacagtacg    |
| Pmv12    | cacctgtttgatgaggcactgcacagagacctagcagacttccggatccagcaccagacttgatcctgctacagtacg    |
| Pmv13    | cacctgtttgatgaggcactgcacagagacctagcagacttccggatccagcaccagacttgatcctgctacagtacg    |
| Pmv14    | cacctgtttgatgaggcactgcacagagacctagcagacttccggatccagcaccagacttgatcctgctacagtacg    |
| Pmv15    | cacctgtttgatgaggcactgcacagagacctagcagacttccggatccagcaccagacttgatcctgctacagtacg    |
| Pmv16    | cacctgtttgatgaggcactgcacagagacctagcagacttccggatccagcaccagacttgatcctgctacagtacg    |
| Pmv17    | -----                                                                             |
| Pmv18    | cacctgtttgatgaggcactgcacagagacctagcagacttccggatccagcaccagacttgatcctgctacagtacg    |
| Pmv19    | cacctgtttgatgaggcactgcacagagacctagcagacttccggatccagcaccagacttgatcctgctacagtacg    |
| Pmv2     | cacctgtttgatgaggcactgcacagagacctagcagacttccggatccagcaccagacttgatcctgctacagtacg    |
| Pmv20    | cacctgtttgatgaggcactgcacagagacctagcagacttccggatccagcaccagacttgatcctgctacagtacg    |
| Pmv21    | cacctgtttgatgaggcactgcacagagacctagcagacttccggatccagcaccagacttgatcctgctacagtacg    |
| Pmv22    | cacctgtttgatgaggcactgcacagagacctagcagacttccggatccagcaccagacttgatcctgctacagtacg    |
| Pmv23    | cacctgtttgatgaggcactgcacagagacctagcagacttccAgatccagcaccagacttgatcctgctacagtacg    |
| Pmv24    | cacctgtttgatgaggcactgcacagagacctagcagacttccggatccagcaccagacttgatcctgctacagtacg    |
| Pmv4     | cacctgtttgatgaggcactgcacagagacctagcagacttccggatccagcaccagacttgatcctgctacagtacg    |
| Pmv5     | cacctgtttgatgaggcactgcacagagacctagcagacttccggatccagcaccagacttgatcctgctacagtacg    |
| Pmv6     | cacctgtttgatgaggcactgcacagagacctagcagacttccggatccagcaccagacttgatcctgctacagtacg    |
| Pmv7     | cacctgtttgatgaggcactgcacagagacctagcagacttccggatccagcaccagacttgatcctgctacagtacg    |
| Pmv8     | cacctgtttgatgaggcactgcacagagacctagcagacttccggatccagcaccagacttgatcctgctacagtacg    |
| Pmv9     | cacctgtttgatgaggcactgcacagagacctagcagGcttccggatccagcaccagacttgatcctgctacagtacg    |

|          |                                                                                   |
|----------|-----------------------------------------------------------------------------------|
| PMV_CONS | TGGATGACTTACTGCTGGCCGCCACTTCTGAGCTCGACTGCCAACAAAGGTACTCGGGCCCTGTTACAAACCTTAGGGAAC |
| Pmv1     | tggatgacttactgctggccgccacttctgagctcgactgccaacaaggtactcgggccctgttacaaaccctagggGac  |
| Pmv10    | tggatgacttactgctggccgccacttctgagctAgactgccaacaaggtactcgggccctgttacaaaccctagggGac  |
| Pmv11    | tggatgacttactgctggccgccacttctgagctcgactgccaacaaggtactcgggccctgttacaaaccctagggGac  |
| Pmv12    | tggatgacttactgctggccgccacttctgagctcgactgccaacaaggtactcgggccctgttacaaaccctagggGac  |
| Pmv13    | tggatgacttactgctggccgccacttctgagctAgactgccaacaaggtactcgggccctgttacaaaccctagggGac  |
| Pmv14    | tggatgacttactgctggccgccacttctgagctAgactgccaacaaggtactcgggccctgttacaaaccctagggGac  |
| Pmv15    | tggatgacttactgctggccgccacttctgagctAgactgccaacaaggtactcgggccctgttacaaaccctagGaaac  |
| Pmv16    | tggatgacttactgctggccgccacttctgagctcgactgccaacaaggtactcgggccctgttacaaaccctagggGac  |
| Pmv17    | -----                                                                             |
| Pmv18    | tggatgacttactgctggccgccacttctgagctcgactgccaacaaggtactcgggccctgttacaaaccctagggGac  |
| Pmv19    | tggatgacttactgctggccgccacttctgagctcgactgccaacaaggtactcgggccctgttacaaaccctagggGac  |
| Pmv2     | tggatgacttactgctggccgccacttctgagctcgactgccaacaaggtactcgggccctgttacaaaccctagggGac  |
| Pmv20    | tggatgacttactgctggccgccacttctgagctcgactgccaacaaggtactcgggccctgttacaaaccctagggGac  |
| Pmv21    | tggatgacttactgctggccgccacttctgagctcgactgccaacaaggtactcgggccctgttacaaaccctagggGac  |
| Pmv22    | tggatgacttactgctggccgccacttctgagctcgactgccaacaaggtactcgggccctgttacaaaccctagggGac  |
| Pmv23    | tggatgacttactgctggccgccacttctgagctAgactgccaacaaggtactcgggccctgttacaaaccctagggGac  |
| Pmv24    | tggatgacttactgctggccgccacttctgagctcgactgccaacaaggtactcgggccctgttacaaaccctagggGac  |
| Pmv4     | tggatgacttactgctggccgccacttctgagctAgactgccaacaaggtactcgggccctgttGaaacccctagGaaac  |
| Pmv5     | tggatgacttactgctggccgccacttctgagctcgactgccaacaaggtactcgggccctgttacaaaccctagggGac  |
| Pmv6     | tggatgacttactgctggccgccacttctgagctcgactgccaacaaggtactcgggccctgttacaaaccctagggGac  |
| Pmv7     | tggatgacttactgctggccgccacttctgagctcgactgccaacaaggtactcgggccctgttacaaaccctagggGac  |
| Pmv8     | tggatgacttactgctggccgccacttctgagctcgactgccaacaaggtactcgggccctgttacaaaccctagggGac  |
| Pmv9     | tggatgacttactgctggccgccacttctgagctcgactgccaacaaggtactcgggccctgttacaaaccctagggGac  |
| PMV_CONS | CTCGGGTATCGGGCCTCGGCCAAGAAAGCCCAAATTTGCCAGAAACAGGTCAAGTATCTGGGGTATCTTCTAAAAAGAGGG |
| Pmv1     | ctcgggtatcgggcctcggccaagaaagcccaaatttgccagaaacaggtcaagtatctggggatcttctaaaaagaggg  |
| Pmv10    | ctcgggtatcgggcctcggccaagaaagcccaaatttgccagaaacaggtcaagtatctggggatcttctaaaaagaggg  |
| Pmv11    | ctcgggtatcgggcctcggccaagaaagcccaaatttgccagaaacaggtcaagtatctggggatcttctaaaaagaggg  |
| Pmv12    | ctcgggtatcgggcctcggccaagaaagcccaaatttgccagaaacaggtcaagtatctggggatcttctaaaaagaggg  |
| Pmv13    | ctcgggtatcgggcctcggccaagaaagcccaaatttgccagaaacaggtcaagtatctggggatcttctaaaaagaggg  |
| Pmv14    | ctcgggtatcgggcctcggccaagaaagcccaaatttgccagaaacaggtcaagtatctggggatcttctaaaaagaggg  |
| Pmv15    | ctcgggtatcgggcctcggccaagaaagcccaaatttgccagaaacaggtcaagtatctggggatcttctaaaaagaggg  |
| Pmv16    | ctcgggtatcgggcctcAgccaagaaagcccaaatttgccagaaacaggtcaagtatctggggatcttctaaaaagaggg  |
| Pmv17    | -----                                                                             |
| Pmv18    | ctcgggtatcgggcctcggccaagaaagcccaaatttgccagaaacaggtcaagtatctggggatcttctaaaaagaggg  |
| Pmv19    | ctcgggtatcgggcctcggccaagaaagcccaaatttgccagaaacaggtcaagtatctggggatcttctaaaaagaggg  |
| Pmv2     | ctcgggtatcgggcctcggccaagaaagcccaaatttgccagaaacaggtcaagtatctggggatcttctaaaaagaggg  |
| Pmv20    | ctcgggtatcgggcctcggccaagaaagcccaaatttgccagaaacaggtcaagtatctggggatcttctaaaaagaggg  |
| Pmv21    | ctcgggtatcgggcctcggccaagaaagcccaaatttgccagaaacaggtcaagtatctggggatcttctaaaaagaggg  |
| Pmv22    | ctcgggtatcgggcctcggccaagaaagcccaaatttgccagaaacaggtcaagtatctggggatcttctaaaaagaggg  |
| Pmv23    | ctcgggtatcgggcctcggccaagaaagcccaaatttgccagaaacaggtcaagtatctggggatcttctaaaaagaggg  |
| Pmv24    | ctcgggtatcgggcctcggccaagaaagcccaaatttgccagaaacaggtcaagtatctggggatcttctaaaaagaggg  |
| Pmv4     | ctcgggtatcgggcctcggccaagaaagcccaaatttgccagaaacaggtcaagtatctggggatcttctaaaaagaggg  |
| Pmv5     | ctcgggtatcgggcctcggccaagaaagcccaaatttgccagaaacaggtcaagtatctggggatcttctaaaaagaggg  |
| Pmv6     | ctcgggtatcgggcctcggccaagaaagcccaaatttgccagaaacaggtcaagtatctggggatcttctaaaaagaggg  |
| Pmv7     | ctcgggtatcgggcctcggccaagaaagcccaaatttgccagaaacaggtcaagtatctggggatcttctaaaaagaggg  |
| Pmv8     | ctcgggtatcgggcctcggccaagaaagcccaaatttgccagaaacaggtcaagtatctggggatcttctaaaaagaggg  |
| Pmv9     | ctcgggtatcgggcctcggccaagaaGgccccaaatttgccagaaacaggtcaagtatctggggatcttctaaaaagaggg |

|          |                                                                                     |
|----------|-------------------------------------------------------------------------------------|
| PMV_CONS | TCAGAGATGGCTGACTGAGGCCAGAAAAGAGACTGTGATGGGGCAGCCTACTCCGAAGACCCCTCGACAACCTAAGGGAGT   |
| Pmv1     | tcagagatggctgactgagggccagaaaagagactgtgatggggcagcctactccgaagacccctcgacaactaagggagt   |
| Pmv10    | tcagagatggctgactgagggccagaaaagagactgtgatggggcagcctactccgaagacccctcgacaactaagggagt   |
| Pmv11    | tcagagatggctgactgagggccagaaaagagactgtgatggggcagcctactccgaagacccctcgacaactaagggagt   |
| Pmv12    | tcagagatggctgactgagggccagaaaagagactgtgatgggAacagcctactccgaagacccctcgacaactaagAagagt |
| Pmv13    | tcagagatggctgactgagggccagaaaagagactgtgatggggcagcctactccgaagacccctcgacaactaagggagt   |
| Pmv14    | tcagagatggctgactgagggccagaaaagagactgtgatggggcagcctactccgaagacccctcgacaactaagggagt   |
| Pmv15    | tcagagatggctgactgagggccagaaaagagactgtgatggggcagcctactccgaagacccctcgacaactaagggagt   |
| Pmv16    | tcagagatggctgactgagggccagaaaagagactgtgatggggcagcctactccgaagacccctcgacaactaagggagt   |
| Pmv17    | -----                                                                               |
| Pmv18    | tcagagatggctgactgagggccagaaaagagactgtgatggggcagcctactccgaagacccctcgacaactaagggagt   |
| Pmv19    | tcagagatggctgactgagggccagaaaagagactgtgatggggcagcctactccgaagacccctcgacaactaagggagt   |
| Pmv2     | tcagagatggctgactgagggccagaaaagagactgtgatggggcagcctactccgaagacccctcgacaactaagggagt   |
| Pmv20    | tcagagatggctgactgGggccagaaaagagactgtgatggggcagcctactccgaagacccctcgacaactaagggagt    |
| Pmv21    | tcagagatggctgactgagggccagaaaagagactgtgatgggAacagcctactccgaagacccctcgacaactaagAagagt |
| Pmv22    | tcagagatggctgactgagggccagaaaagagactgtgatggggcagcctactccgaagacccctcgacaactaagggagt   |
| Pmv23    | tcagagatggctgactgagggccagaaaagagactgtgatggggcagcctactccgaagacccctcgacaactaagggagt   |
| Pmv24    | tcagagatggctgactgagggccagaaaagagactgtgatggggcagcctactccgaagacccctcgacaactaagggagt   |
| Pmv4     | tcagagatggctgactgagggccagaaaagagactgtgatggggcagcctactccgaagacccctcgacaactaagggagt   |
| Pmv5     | tcagagatggctgactgagggccagaaaagagactgtgatggggcagcctactccgaagacccctcgacaactaagggagt   |
| Pmv6     | tcagagatggctgactgagggccagaaaagagactgtgatggggcagcctactccgaagacccctcgacaactaagggagt   |
| Pmv7     | tcagagatggctgactgagggccagaaaagagactgtgatggggcagcctactccgaagacccctcgacaactaagggagt   |
| Pmv8     | tcagagatggctgactgagggccagaaaagagactgtgatggggcagcctactccgaagacccctcgacaactaagggagt   |
| Pmv9     | tcagagatggctgactgagggccagaaaagagactgtgatggggcagcctactccgaagacccctcgacaactaagggagt   |
| PMV_CONS | TCCTAGGGACGGCAGGCTTCTGTGCGCTCTGGATCCCTGGGTTTGCAGAAATGGCAGCCCCCTTGTACCCCTCTCACCAAA   |
| Pmv1     | tcctagggacggcaggcttctgtcgccctctggatccctgggtttgcagaaatggcagcccccttgtacctctcaccaaaa   |
| Pmv10    | tcctagggacggcaggcttctgtcgccctctggatccctgggtttgcagaaatggcagcccccttgtacctctcaccaaaa   |
| Pmv11    | tcctagggacggcaggcttctgtcgccctctggatccctgggtttgcagaaatggcagcccccttgtacctctcaccaaaa   |
| Pmv12    | tcctagggacggcaggcttctgtcgccctctggatccctgggtttgcagaaatggcagcccccttgtacctctcaccaaaa   |
| Pmv13    | tcctagggacggcaggcttctgtcgccctctggatccctgggtttgcagaaatggcagcccccttgtacctctcaccaaaa   |
| Pmv14    | tcctagggacggcaggcttctgtcgccctctggatccctgggtttgcagaaatggcagcccccttgtacctctcaccaaaa   |
| Pmv15    | tcctagggacggcaggcttctgtcgccctctggatccctgggtttgcagaaatggcagcccccttgtacctctcaccaaaa   |
| Pmv16    | tcctagggacggcaggcttctgtcgccctctggatccctgggtttgcagaaatggcagcccccttgtacctctcaccaaaa   |
| Pmv17    | -----                                                                               |
| Pmv18    | tcctagggacggcaggcttctgtcgccctctggatccctgggtttgcagaaatggcagcccccttgtacctctcaccaaaa   |
| Pmv19    | tcctagggacggcaggcttctgtcgccctctggatccctgggtttgcagaaatggcagcccccttgtacctctcaccaaaa   |
| Pmv2     | tcctagggacggcaggcttctgtcgccctctggatcccAaggtttgcagaaatggcagcccccttgtacctctcaccaaaa   |
| Pmv20    | tcctagggacggcaggcttctgtcgccctctggatccctgggtttgcagaaatggcagcccccttgtacctctcaccaaaa   |
| Pmv21    | tcctagggacggcaggcttctgtcgccctctggatccctgggtttgcagaaatggcagcccccttgtacctctcaccaaaa   |
| Pmv22    | tcctagggacggcaggcttctgtcgccctctggatccctgggtttgcagaaatggcagcccccttgtacctctcaccaaaa   |
| Pmv23    | tcctagggacggcaggcttctgtcgccctctggatccctgggtttgcagaaatggcagcccccttgtacctctcaccaaaa   |
| Pmv24    | tcctagggacggcaggcttctgtcgccctctggatccctgggtttgcagaaatggcagcccccttgtacctctcaccaaaa   |
| Pmv4     | tcctagggacggcaggcttctgtcgccctctggatccctgggtttgcagaaatggcagcccccttgtacctctcaccaaaa   |
| Pmv5     | tcctagggacggcaggcttctgtcgccctctggatccctgggtttgcagaaatggcagcccccttgtacctctcaccaaaa   |
| Pmv6     | tcctagggacggcaggcttctgtcgccctctggatccctgggtttgcagaaatggcagcccccttgtacctctcaccaaaa   |
| Pmv7     | tcctagggacggcaggcttctgtcgccctctggatccctgggtttgcagaaatggcagcccccttgtacctctcaccaaaa   |
| Pmv8     | tcctagggacggcaggcttctgtcgccctctggatccctgggtttgcagaaatggcagcccccttgtacctctcaccaaaa   |
| Pmv9     | tcctagggacggcaggcttctgtcgccctctggatccctgggtttgcagaaatggcagcccccttgtacctctcaccaaaa   |

|          |                                                                                   |
|----------|-----------------------------------------------------------------------------------|
| PMV_CONS | ACGGGGACTCTGTTTAAATTGGGGCCCAGACCAGCAAAAGGCCTATCAAGAAATCAAACAGGCTCTTCTAACTGCCCCAGC |
| Pmv1     | acggggactctgtttaattggggcccagaccagcaaaaggcctatcaagaaatcaaacaggctcttcttaactgccccagc |
| Pmv10    | acggggactctgtttaattggggcccagaccagcaaaaggcctatcaagaaatcaaacaggctcttcttaactgccccagc |
| Pmv11    | acggggactctgtttaattggggcccagaccagcaaaaggcctatcaagaaatcaaacaggctcttcttaactgccccagc |
| Pmv12    | acggggactctgtttaattggggcccagaccagcaaaaggcctatcaagaaatcaaacaggctcttcttaactgccccagc |
| Pmv13    | acggggactctgtttaattggggcccagaccagcaaaaggcctatcaagaaatcaaacaggctcttcttaactgccccagc |
| Pmv14    | acggggactctgtttaattggggcccagaccagcaaaaggcctatcaagaaatcaaacaggctcttcttaactgccccagc |
| Pmv15    | acggggactctgtttaattggggcccagaccagcaaaaggcctatcaagaaatcaaacaggctcttcttaactgccccagc |
| Pmv16    | acggggactctgtttaattggggcccagaccagcaaaaggcctatcaagaaatcaaacaggctcttcttaactgccccagc |
| Pmv17    | -----                                                                             |
| Pmv18    | acggggactctgtttaattggggcccagaccagcaaaaggcctatcaagaaatcaaacaggctcttcttaactgccccagc |
| Pmv19    | acggggactctgtttaattggggcccagaccagcaaaaggcctatcaagaaatcaaacaggctcttcttaactgccccagc |
| Pmv2     | acggggactctgtttaattggggcccagaccagcaaaaggcctatcaagaaatcaaacaggctcttcttaactgccccagc |
| Pmv20    | acggggactctgtttaattggggcccagaccagcaaaaggcctatcaagaaatTaaacaggctcttcttaactgccccagc |
| Pmv21    | acggggactctgtttaattggggcccagaccagcaaaaggcctatcaagaaatcaaacaggctcttcttaactgccccagc |
| Pmv22    | acggggactctgtttaattggggcccagaccagcaaaaggcctatcaagaaatcaaacaggctcttcttaactgccccagc |
| Pmv23    | acggggactctgtttaattggggcccagaccagcaaaaggcctatcaagaaatcaaacaggctcttcttaactgccccagc |
| Pmv24    | acggggactctgtttaattggggcccagaccagcaaaaggcctatcaagaaatTaaacaggctcttcttaactgccccagc |
| Pmv4     | acggggactctgtttaattggggcccagaccagcaaaaggcctatcaaAaaatcaaacaggctcttcttaactgccccagc |
| Pmv5     | acggggactctgtttaattggggcccagaccagcaaaaggcctatcaagaaatcaaacaggctcttcttaactgccccagc |
| Pmv6     | acggggactctgtttaattggggcccagaccagcaaaaggcctatcaagaaatcaaacaggctcttcttaactgccccagc |
| Pmv7     | acggggactctgtttaattggggcccagaccagcaaaaggcctatcaagaaatcaaacaggctcttcttaactgccccagc |
| Pmv8     | acggggactctgtttaattggggcccagaccagcaaaaggcctatcaagaaatcaaacaggctcttcttaactgccccagc |
| Pmv9     | acggggactctgtttaattggggcccagaccagcaaaaggcctatcaagaaatcaaacaggctcttcttaactgccccagc |
| PMV_CONS | CCTGGGATTGCCAGATTGACTAAGCCCTTTGAACCTTTTGTGACGAGAAGCAGGGCTACGCCAAAGGCCTCTTAACGC    |
| Pmv1     | cctgggattgccagatttgactaagccctttgaactctttgttgacgagaagcagggctacgccaaaggcgctcctaacgc |
| Pmv10    | cctgggattgccagatttgactaagccctttgaactctttgtGgacgagaagcagggctacgccaaaggcgctcctaacgc |
| Pmv11    | cctgggattgccagatttgactaagccctttgaactctttgttgacgagaagcagggctacgccaaaggcgctcctaacgc |
| Pmv12    | cctgggattgccagatttgactaagccctttgaactctttgttgacgagaagcagggctacgccaaaggcgctcctaacgc |
| Pmv13    | cctgggattgccagatttgactaagccctttgaactctttgtGgacgagaagcagggctacgccaaaggcgctcctaacgc |
| Pmv14    | cctgggattgccagatttgactaagccctttgaactctttgtGgacgagaagcagggctacgccaaaggcgctcctaacgc |
| Pmv15    | cctgggattgccagatttgactaagccctttgaactctttgtGgacgagaagcagggctacgccaaaggcgctcctaacgc |
| Pmv16    | cctgggattgccagatttgactaagccctttgaactctttgttgacgagaagcagggctacgccaaaggcgctcctaacgc |
| Pmv17    | -----                                                                             |
| Pmv18    | cctgggattgccagatttgactaagccctttgaactctttgttgacgagaagcagggctacgccaaaggcgctcctaacgc |
| Pmv19    | cctgggattgccagatttgactaagccctttgaactctttgttgacgagaagcagggctacgccaaaggcgctcctaacgc |
| Pmv2     | cctgggattgccagatttgactaagccTtttgaactctttgttgacgagaagcagggctacgccaaaggcgctcctaacgc |
| Pmv20    | cctgggattgccagatttgactaagccctttgaactctttgttgacgagaagcagggctacgccaaaggcgctcctaacgc |
| Pmv21    | cctgggattgccagatttgactaagccctttgaactctttgttgacgagaagcagggctacgccaaaggcgctcctaacgc |
| Pmv22    | cctgggattgccagatttgactaagccctttgaactctttgttgacgagaagcagggctacgccaaaggcgctcctaacgc |
| Pmv23    | cctgAgattgccagatttgactaagccctttgaactctttgtGgacgagaagcagggctacgccaaaggcgctcctaacgc |
| Pmv24    | cctgggattgccagatttgactaagccctttgaactctttgttgacgagaagcagggctacgccaaaggcgctcctaacgc |
| Pmv4     | cctgAgattgccagatttgactaagccctttAaactctttgtGgacgagaagcagggctacgccaaaggcgctcctaacgc |
| Pmv5     | cctgggattgccagatttgactaagccctttgaactctttgttgacgagaagcagggctacgccaaaggcgctcctaacgc |
| Pmv6     | cctgggattgccagatttgactaagccctttgaactctttgttgacgagaagcagggctacgccaaaggcgctcctaacgc |
| Pmv7     | cctgggattgccagatttgactaagccTtttgaactctttgttgacgagaagcagggctacgccaaaggcgctcctaacgc |
| Pmv8     | cctgggattgccagatttgactaagccctttgaactctttgttgacgagaagcagggctacgccaaaggcgctcctaacgc |
| Pmv9     | cctgggattgccagatttgactaagccctttgaactctttgtGgacgagaagcagggctacgccaaaggcgctcctaacgc |







|          |                                                                                   |
|----------|-----------------------------------------------------------------------------------|
| PMV_CONS | AGACCGAGGTAATCTGGGCCAAGGCCTTGCCAGCCGGGACATCCGCCCAGCGAGCTGAACTAATAGCACTACCCAGGCC   |
| Pmv1     | agaccgaggtaatctgggccaaaggcgttgccagccgggacatccgccagcgagctgaactaatagcaactacccaggcc  |
| Pmv10    | agaccgaggtaatctgggccaaaggcgttgccagccgggacatccgccagcgagctgaactaatagcaactacccaggcc  |
| Pmv11    | agaccgaggtaatctgggccaaaggcgttgccagccgggacatccgccagcgagctgaactaatagcaactacccaggcc  |
| Pmv12    | agaccgaggtaatctgggccaaaggcgttgccagccgggacatccgccagcgagctgaactaatagcaactacccaggcc  |
| Pmv13    | agaccgaggtaatctgggccaaaggcgttgccagccgggacatccgccagcgagctgaactaatagcaactacccaggcc  |
| Pmv14    | agaccgaggtaatctgggccaaaggcgttgccagccgggacatccgccagcgagctgaactaatagcaactacccaggcc  |
| Pmv15    | agaccgaggtaatctgggccaaaggcgttgccagccgggacatccgccagcgagctgaactaatagcaactacccaggcc  |
| Pmv16    | agaccgaggtaatctgggccaaaggcgttgccagccgggacatccgccagcgagctgaactaatagcaactacccaggcc  |
| Pmv17    | -----atctgggccaaaggcgttgccagccgggacatccgccagcgagctgaactaatagcaactacccaggcc        |
| Pmv18    | agaccgaggtaatctgggccaaaggcgttgccagccgggacatccgccagcgagctgaactaatagcaactacccaggcc  |
| Pmv19    | agaccgaggtaatctgggccaaaggcgttgccagccgggacatccgccagcgagctgaactaatagcaactacccaggcc  |
| Pmv2     | agaccgaggtaatctgggccaaaggcgttgccagccgggacatccgccagcgagctgaactaatagcaactacccaggcc  |
| Pmv20    | agaccgaggtaatctgggccaaaggcgttgccagccgggacatccgccagcgagctgaactaatagcaactacccaggcc  |
| Pmv21    | agaccgaggtaatctgggccaaaggcgttgccagccgggacatccgccagcgagctgaactaatagcaactacccaggcc  |
| Pmv22    | agaccgaggtaatctgggccaaaggcgttgccagccgggacatccgccagcgagctgaactaatagcaactacccaggcc  |
| Pmv23    | agaccgaggtaatctgggccaaaggcgttgccagccgggacatccgccagcgagctgaactaatagcaactacccaggcc  |
| Pmv24    | agaccgaggtaatctgggccaaaggcgttgccagccgggacatccgccagcgagctgaactaatagcaactacccaggcc  |
| Pmv4     | agaccgaggtaatctgggccaaaggcAAtggccagccgggacatccgccagcgagctgaactaatagcaactacccaggcc |
| Pmv5     | agaccgaggtaatctgggccaaaggcgttgccagccgggacatccgccagcgagctgaactaatagcaactacccaggcc  |
| Pmv6     | agaccgaggtaatctgggccaaaggcgttgccagccgggacatccgccagcgagctgaactaatagcaactacccaggcc  |
| Pmv7     | agaccgaggtaatctgggccaaaggcgttgccagccgggacatccgccagcgagctgaactaatagcaactacccaggcc  |
| Pmv8     | agaccgaggtaatctgggcc-----                                                         |
| Pmv9     | agaccgaggtaatctgggccaaaggcAAtggccagccgggacatccgccagcgagctgaactaatagcaactacccaggcc |

  

|          |                                                                                   |
|----------|-----------------------------------------------------------------------------------|
| PMV_CONS | CTAAAGATGGCAGAAGGTAAGAAGCTAAATGTTTATACTGATAGCCGCTATGCCTTTGCTACCGCCCATGTCCATGGAGA  |
| Pmv1     | ctaaagatggcagaaggttaagaagctaaatgtttatactgatagccgctatgcctttgctaccgcccataccatggaga  |
| Pmv10    | ctaaagatggcagaaggttaagaagctaaatgtttatactgatagccgctatgcctttgctaccgcccataccatggaga  |
| Pmv11    | ctaaagatggcagaaggttaagaagctaaatgtttatactgatagccgctatgcctttgctaccgcccataccatggaga  |
| Pmv12    | ctaaagatggcagaaggttaagaagctaaatgtttatactgatagccgctatgcctttgctaccgcccataccatggaga  |
| Pmv13    | ctaaagatggcagaaggttaagaagctaaatgtttatactgatagccgctatgcctttgctaccgcccataccatggaga  |
| Pmv14    | ctaaagatggcagaaggttaagaagctaaatgtttatactgatagccgctatgcctttgctaccgcccataccatggaga  |
| Pmv15    | ctaaagatggcagaaggttaagaagctaaatgtttatactgatagccgctatgcctttgctaccgcccataccatggaga  |
| Pmv16    | ctaaagatggcagaaggttaagaagctaaatgtttatactgatagccgctatgcctttgctaccgcccataccatggaga  |
| Pmv17    | ctaaagatggcagaaggttaagaagctaaatCgtttatactgatagccgctatgcctttgctaccgcccataccatggaga |
| Pmv18    | ctaaagatggcagaaggttaagaagctaaatgtttatactgatagccgctatgcctttgctaccgcccataccatggaga  |
| Pmv19    | ctaaagatggcagaaggttaagaagctaaatgtttatactgatagccgctatgcctttgctaccgcccataccatggaga  |
| Pmv2     | ctaaagatggcagaaggttaagaagctaaatgtttatactgatagccgctatgcctttgctaccgcccataccatggaga  |
| Pmv20    | ctaaagatggcagaaggttaagaagctaaatgtttatactgatagccgctatgcctttgctaccgcccataccatggaga  |
| Pmv21    | ctaaagatggcagaaggttaagaagctaaatgtttatactgatagccgctatgcctttgctaccgcccataccatggaga  |
| Pmv22    | ctaaagatggcagaaggttaagaagctaaatgtttatactgatagccgctatgcctttgctaccgcccataccatggaga  |
| Pmv23    | ctaaagatggcagaaggttaagaagctaaatgtttatactgatagccgctatgcctttgctaccgcccataccatggaga  |
| Pmv24    | ctaaagatggcagaaggttaagaagctaaatgtttatactgatagccgctatgcctttgctaccgcccataccatggaga  |
| Pmv4     | ctaaagatggcagaaggttaaAagctaaatgtttatactgatagccgctatgcctttgctaccgcccataccatggaga   |
| Pmv5     | ctaaagatggcagaaggttaagaagctaaatgtttatactgatagccgctatgcctttgctaccgcccataccatggaga  |
| Pmv6     | ctaaagatggcagaaggttaagaagctaaatgtttatactgatagccgctatgcctttgctaccgcccataccatggaga  |
| Pmv7     | ctaaagatggcagaaggttaagaagctaaatgtttatactgatagccgctatgcctttgctaccgcccataccatggaga  |
| Pmv8     | -----                                                                             |
| Pmv9     | ctaaagatggcagaaggttaagaagctaaatgtttatactgatagccgctatgcctttgctaccgcccataccatggaga  |

|          |                                                                                   |
|----------|-----------------------------------------------------------------------------------|
| PMV_CONS | AATATATAGGAGACGTGGGTTGCTCACCTCAGAAGGCAAGGAGATCAAGAACAAGGGCGAAATCTTGGCCTTACTGAAAG  |
| Pmv1     | aatatataggagacgtgggttgctcacctcagaaggcaaggagatcaagaacaagggcgaaatcttggccttactgaaag  |
| Pmv10    | aatatataggagacgtgggttgctcacctcagaaggcaaggagatcaagaacaagggcgaaatcttggccttactgaaag  |
| Pmv11    | aatatataggagacgtgggttgctcacctcagaaggcaaggagatcaagaacaagggcgaaatcttggccttactgaaag  |
| Pmv12    | aatatataggagacgtgggttgctcacctcagaaggcaaggagatcaagaacaagggcgaaatcttggccttactgaaag  |
| Pmv13    | aatatataggagacgtgggttgctcacctcagaaggcaaggagatcaagaacaagggcgaaatcttggccttactgaaag  |
| Pmv14    | aatatataggagacgtgggttgctcacctcagaaggcaaAagagatcaagaacaagggcgaaatcttggccttactgaaag |
| Pmv15    | aatatataggagacgtgggttgctcacctcagaaggcaaggagatcaagaacaagggcgaaatcttAgccttactAaaag  |
| Pmv16    | aatatataggagacgtgggttgctcacctcagaaggcaaggagatcaagaacaagggcgaaatcttggccttactgaaag  |
| Pmv17    | aatatataggagacgtgggttgctcacctcagaaggcaaggagatcaaAaacaagggcgaaatcttggccttactgaaag  |
| Pmv18    | aatatataggagacgtgggttgctcacctcagaaggcaaggagatcaagaacaagggcgaaatcttggccttactgaaag  |
| Pmv19    | aatatataggagacgtgggttgctcacctcagaaggcaaggagatcaagaacaagggcgaaatcttggccttactgaaag  |
| Pmv2     | aatatataggagacgtgggttgctcacctcagaaggcaaggagatcaagaacaagggcgaaatcttggccttactgaaag  |
| Pmv20    | aatatataggagacgtgggttgctcacctcagaaggcaaAgagatcaagaacaagggcgaaatcttggccttactgaaag  |
| Pmv21    | aatatataggagacgtgggttgctcacctcagaaggcaaggagatcaagaacaagggcgaaatcttggccttactgaaag  |
| Pmv22    | aatatataggagacgtgggttgctcacctcagaaggcaaggagatcaagaacaagggcgaaatcttggccttactgaaag  |
| Pmv23    | aatatataggagacgtgggttgctcacctcagaaggcaaggagatcaagaacaagggcgaaatcttggccttactgaaag  |
| Pmv24    | aatatataggagacgtgggttgctcacctcagaaggcaaAgagatcaagaacaagggcgaaatcttggccttactgaaag  |
| Pmv4     | aatatataAgagacgtgggttgctcacctcagaaggcaaggagatcaagaacaagggcgaaatcttggccttactgaaag  |
| Pmv5     | aatatataggagacgtgggttgctcacctcagaaggcaaggagatcaagaacaagggcgaaatcttggccttactgaaag  |
| Pmv6     | aatatataggagacgtgggttgctcacctcagaaggcaaggagatcaagaacaagggcgaaatcttggccttactgaaag  |
| Pmv7     | aatatataggagacgtgggttgctcacctcagaaggcaaggagatcaagaacaagggcgaaatcttggccttactgaaag  |
| Pmv8     | -----                                                                             |
| Pmv9     | aatatataggagacgtgggttgctcacctcagaaggcaaggagatcaagaacaagggcgaaatcttggccttactgaaag  |

|          |                                                                                |
|----------|--------------------------------------------------------------------------------|
| PMV_CONS | CTCTCTTTCTGCCAAAAGACTCAGTATAATTCACTGCCAGGACATCAGAAAGGCAATAGTGCTGAAGCTAAAGGCAAC |
| Pmv1     | ctctctttctgccccaaagactcagtataattcactgccaggacatcagaaggcaatagtgtgaagctaaaggcaac  |
| Pmv10    | ctctctttctgccccaaagactcagtataattcactgccaggacatcagaaggcaatagtgtgaagctaaaggcaac  |
| Pmv11    | ctctctttctgccccaaagactcagtataattcactgccaggacatcagaaggcaatagtgtgaagctaaaggcaac  |
| Pmv12    | ctctctttctgccccaaagactcagtataattcactgccaggacatcagaaggcaatagtgtgaagctaaaggcaac  |
| Pmv13    | ctctctttctgccccaaagactcagtataattcactgccaggacatcagaaggcaatagtgtgaagctaaaggcaac  |
| Pmv14    | ctctctttctgccccaaagactcagtataattcactgccaggacatcagaaggcaatagtgtgaagctaaaggcaac  |
| Pmv15    | ctctctttctgccccaaagactcagtataattcactgccaggacatcagaaggcaatagtgtgaagctaaaggcaac  |
| Pmv16    | ctctctttctgccccaaagactcagtataattcactgccaggacatcagaaggcaatagtgtgaagctaaaggcaac  |
| Pmv17    | ctctcttttTgccccaaagactcagtataattcactgccaggacatcagaaggcaatagtgtgaagctaaaggcaac  |
| Pmv18    | ctctctttctgccccaaagactcagtataattcactgccaggacatcagaaggcaatagtgtgaagctaaaggcaac  |
| Pmv19    | ctctctttctgccccaaagactcagtataattcactgccaggacatcagaaggcaatagtgtgaagctaaaggcaac  |
| Pmv2     | ctctctttctgccccaaagactcagtataattcactgccaggacatcagaaggcaatagtgtgaagctaaaggcaac  |
| Pmv20    | ctctctttctgccccaaagactcagtataattcactgccaggacatcagaaggcaatagtgtgaagctaaaggcaac  |
| Pmv21    | ctctctttctgccccaaagactcagtataattcactgccaggacatcagaaggcaatagtgtgaagctaaaggcaac  |
| Pmv22    | ctctctttctgccccaaagactcagtataattcactgccaggacatcagaaggcaatagtgtgaagctaaaggcaac  |
| Pmv23    | ctctctttctgccccaaagactcagtataattcactgccaggacatcagaaggcaatagtgtgaagctaaaggcaac  |
| Pmv24    | ctctctttctgccccaaagactcagtataattcactgccaggacatcagaaggcaatagtgtgaagctaaaggcaac  |
| Pmv4     | ctctctttctgccccaaagactcagtataattcactgccaggacatcagaaggcaatagtgtgaagctaaaggcaac  |
| Pmv5     | ctctctttctgccccaaagactcagtataattcactgccaggacatcagaaggcaatagtgtgaagctaaaggcaac  |
| Pmv6     | ctctctttctgccccaaagactcagtataattcactgccaggacatcagaaggcaatagtgtgaagctaaaggcaac  |
| Pmv7     | ctctctttctgccccaaagactcagtataattcactgccaggacatcagaaggcaatagtgtgaagctaaaggcaac  |
| Pmv8     | -----                                                                          |
| Pmv9     | ctctctttctgccccaaagactcagtataattcactgccaggacatcagaaggcaatagtgtgaagctaaaggcaac  |

|          |                                                                                   |
|----------|-----------------------------------------------------------------------------------|
| PMV_CONS | CGAATGGCGGACCAGGCAGCCCGGGAAGCAGCCATGGGGACTGACACAAAGGCCCTCTCACTTCTCATAGAGACCTCAAC  |
| Pmv1     | cgaatggcgggaccaggcagcccggaagcGgccatggggactgacacaaaggcctcctcacttctcatagagacctcaac  |
| Pmv10    | cgaatggcgggaccaggcagcccggaagcagccatggggactgacacaaaggcctcctcacttctcatagagacctcaac  |
| Pmv11    | cgaatggcgggaccaggcagcccggaagcGgccatggggactgacacaaaggcctcctcacttctcatagagacctcaac  |
| Pmv12    | cgaatggcgggaccaggcagcccggaagcagccatggggactgacacaaaggcctcctcacttctcatagagacctcaac  |
| Pmv13    | cgaatggcgggaccaggcagcccggaagcagccatggggactgacacaaaggcctcctcacttctcatagagacctcaac  |
| Pmv14    | cgaatggcgggaccaggcagcccggaagcagccatggggactgacacaaagAcctcctcacttctcatagagacctcaac  |
| Pmv15    | cgaatggcgggaccaggcagcccggaagcagccatggggactgacacaaagAcctcctcacttctcatagagacctcaac  |
| Pmv16    | cgaatggcgggaccaggcagcccggaagcGgccatggggactgacacaaaggcctcctcacttctcatagagacctcaac  |
| Pmv17    | AAatggcgggaccaggcagcccggaagcagccatggggactgacacaaaggcctcctcacttctcatagagacctcaac   |
| Pmv18    | cgaatggcgggaccaggcagcccggaagcagccatggggactgacacaaaggcctcctcacttctcatagagacctcaac  |
| Pmv19    | cgaatggcgggaccaggcagcccggaagcagccatggggactgacacaaaggcctcctcacttctcatagagacctcaac  |
| Pmv2     | cgaatggcgggaccaggcagcccggaagcagccatggggactgacacaaaggcctcctcacttctcatagagacctcaac  |
| Pmv20    | cgaatggcgggaccaggcagcccgAgaagcagccatggggactgacacaaaggcctcctcacttctcatagagacctcaac |
| Pmv21    | AAatggcgggaccaggcagcccggaagcagccatggggactgacacaaaggcctcctcacttctcatagagacctcaac   |
| Pmv22    | cgaatggcgggaccaggcagcccggaagcagccatggggactgacacaaaggcctcctcacttctcatagagacctcaac  |
| Pmv23    | cgaatggcgggaccaggcagcccggaagcagccatggggactgacacaaaggcctcctcacttctcatagagacctcaac  |
| Pmv24    | cgaatggcgggaccaggcagcccggaagcagccatggggactgacacaaaggcctcctcacttctcatagagacctcaac  |
| Pmv4     | cgaatggcgggaccaggcagcccggaagcagccatggggactAcacaaaggcctcctcacttctcatagagacctcaac   |
| Pmv5     | cgaatggcgggaccaggcagcccggaagcGgccatggggactgacacaaaggcctcctcacttctcatagagacctcaac  |
| Pmv6     | cgaatggcgggaccaggcagcccggaagcagccatggggactgacacaaaggcctcctcacttctcatagagacctcaac  |
| Pmv7     | cgaatggcgggaccaggcagcccggaagcagccatggggactgacacaaaggcctcctcacttctcatagagacctcaac  |
| Pmv8     | -----                                                                             |
| Pmv9     | cgaatggcgggaccaggcagcccggaagcagccatggggactgacacaaaggcctcctcacttctcatagagacctcaac  |

|          |                                                                                    |
|----------|------------------------------------------------------------------------------------|
| PMV_CONS | CCCGTACACTCCAGACTTCTTCCATTATACTGAGACAGATATAAAGAACCCTACAAGAGTTGGGAGCCACATATGATAGAG  |
| Pmv1     | cccgtacactccagacttcttccattatactgagacagatataaagaacctacaagagttgggagccacatatgatagag   |
| Pmv10    | cccgtacactccagacttcttccattatactgagacagatataaagaacctacaagagttgggagccacatatgatagag   |
| Pmv11    | cccgtacactccagacttcttccattatactgagacagatataaagaacctacaagagttgggagccacatatgatagag   |
| Pmv12    | cccgtacactccagacttcttccattatactgagacagatataaagaacctacaagagttgggagccacatatgatagag   |
| Pmv13    | cccgtacactccagacttcttccattatactgagacagatataaagaacctacaagagttgggagccacatatgatagag   |
| Pmv14    | cccgtacactccagacttcttccattatactgagacagatataaagaacctacaagagttgggagccacatatgatagag   |
| Pmv15    | cccgtacactccagacttcttccattatactgagacagatataaagaacctacaagagttgggagccacatatgatagag   |
| Pmv16    | cccgtacactccagacttcttccattatactgagacagatataaagaacctacaagagttgggagccacatatgatagag   |
| Pmv17    | cccgtacactccagacttcttccattatactgagacagatataaagaacctacaagagttgggagccacatatgatagag   |
| Pmv18    | cccgtacactccagacttcttccattatactgagacagatataaagaacctacaagagttgggagccacatatgatagag   |
| Pmv19    | cccgtacactccagacttcttccattatactgagacagatataaagaacctacaagagttgggagccacatatgatagag   |
| Pmv2     | cccgtacactccagacttcttccattatactgagacagatataaagaacctacaagagttgggagccacatatgatagag   |
| Pmv20    | cccgtacactccagacttcttccattataCactgagacagatataaagaacctacaagagttgggagccacatatgatagag |
| Pmv21    | cccgtacactccagacttcttccattatactgagacagatataaagaacctacaagagttgggagccacatatgatagag   |
| Pmv22    | cccgtacactccagacttcttccattatactgagacagatataaagaacctacaagagttgggagccacatatgatagag   |
| Pmv23    | cccgtacactccagacttcttccattatactgagacagatataaagaacctacaagagttgggagccacatatgatagag   |
| Pmv24    | cccgtacactccagacttcttccattataCactgagacagatataaagaacctacaagagttgggagccacatatgatagag |
| Pmv4     | cccgtacactccagacttcttccattatactgagacagatataaagaacctacaGgagttgggagccacatatgatagag   |
| Pmv5     | cccgtacactccagacttcttccattatactgagacagatataaagaacctacaagagttgggagccacatatgatagag   |
| Pmv6     | cccgtacactccagacttcttccattatactgagacagatataaagaacctacaagagttgggagccacatatgatagag   |
| Pmv7     | cccgtacactccagacttcttccattatactgagacagatataaagaacctacaagagttgggagccacatatgatagag   |
| Pmv8     | -----                                                                              |
| Pmv9     | cccgtacactccagacttcttccattatactgagacagatataaagaacctacaagagttgggagccacatatgatagag   |

|          |                                                                                    |
|----------|------------------------------------------------------------------------------------|
| PMV_CONS | AGAAAAAATATTGGGTCCTGCAAGGTAAACCTGTGATGCCTGACCAGTTCACCTTTGAATTATTAGACTTCCTTCACCAG   |
| Pmv1     | agaaaaaataattgggtcctgcaaggtaaaccctgtgatgcctgaccagttcacctttgaattattagacttccttcaccag |
| Pmv10    | agaaaaaataattgggtcctgcaaggtaaaccctgtgatgcctgaccagttcacctttgaattattagacttccttcaccag |
| Pmv11    | agaaaaaataattgggtcctgcaaggtaaaccctgtgatgcctgaccagttcacctttgaattattagacttccttcaccag |
| Pmv12    | aAaaaaaataattgggtcctgcaaggtaaaccctgtgatgcctgaccagttcacctttgaattattagacttccttcaccag |
| Pmv13    | agaaaaaataattgggtcctgcaaggtaaaccctgtgatgcctgaccagttcacctttgaattattagacttccttcaccag |
| Pmv14    | agaaaaaataattgggtcctgcaaggtaaaccctgtgatgcctgaccagttcacctttAaattattagacttccttcaccag |
| Pmv15    | aAaaaaaataattgggtcctgcaaggtaaaccctgtgatgcctgaccagttcacctttAaattattagacttccttcaccag |
| Pmv16    | agaaaaaataattgggtcctgcaaggtaaaccctgtgatgcctgaccagttcacctttAaattattagacttccttcaccag |
| Pmv17    | agaaaaaataattgggtcctgcaaggtaaaccctgtgatgcctgaccagttcacctttgaattattagacttccttcaccag |
| Pmv18    | agaaaaaataattgggtcctgcaaggtaaaccctgtgatgcctgaccagttcacctttgaattattagacttccttcaccag |
| Pmv19    | agaaaaaataattgggtcctgcaaggtaaaccctgtgatgcctgaccagttcacctttgaattattagacttccttcaccag |
| Pmv2     | agaaaaaataattgggtcctgcaaggtaaaccctgtgatgcctgaccagttcacctttAaattattagacttccttcaccag |
| Pmv20    | agaaaaaataattgggtcctgcaaggtaaaccctgtgatgcctgaccagttcacctttgaattattagacttccttcaccag |
| Pmv21    | agaaaaaataattgggtcctgcaaggtaaaccctgtgatgcctgaccagttcacctttAaattattagacttccttcaccag |
| Pmv22    | agaaaaaataattgggtcctgcaaggtaaaccctgtgatgcctgaccagttcacctttgaattattagacttccttcaccag |
| Pmv23    | agaaaaaataattgggtcctgcaaggtaaaccctgtgatgcctgaccagttcacctttgaattattagacttccttcaccag |
| Pmv24    | agaaaaaataattgggtcctgcaaggtaaaccctgtgatgcctgaccagttcacctttgaattattagacttccttcaccag |
| Pmv4     | aAaaaaaataattgggtcctgcaaggtaaaccctgtgatgcctgaccagttcacctttAaattattagacttccttcaccag |
| Pmv5     | agaaaaaataattgggtcctgcaaggtaaaccctgtgatgcctgaccagttcacctttgaattattagacttccttcaccag |
| Pmv6     | agaaaaaataattgggtcctgcaaggtaaaccctgtgatgcctgaccagttcacctttgaattattagacttccttcaccag |
| Pmv7     | agaaaaaataattgggtcctgcaaggtaaaccctgtgatgcctgaccagttcacctttgaattattagacttccttcaccag |
| Pmv8     | -----                                                                              |
| Pmv9     | agaaaaaataattgggtcctgcaaggtaaaccctgtgatgcctgaccagttcacctttgaattattagacttccttcaccag |

|          |                                                                                  |
|----------|----------------------------------------------------------------------------------|
| PMV_CONS | CTCACCACCTTAGCTATCAGAAGATGAGGGCACTTCTAGACAGGAAAGAAAGCCCTATTACATGCTAAATAAAGATAA   |
| Pmv1     | ctcaccacaccttagctatcagaagatgagggcacttctagacaggaagaaagccctattacatgctaaataaagataa  |
| Pmv10    | ctcaccacaccttagctatcagaagatgagggcacttctagacaggaagaaagccctattacatgctaaataaagataa  |
| Pmv11    | ctcaccacaccttagctatcagaagatgagggcacttctagacaggaagaaagccctattacatgctaaataaagataa  |
| Pmv12    | ctcaccacaccttagctatcagaagatgagggcacttctagacaggaagaaagccctattacatgctaaataaagataa  |
| Pmv13    | ctcaccacaccttagctatcagaagatgagggcacttctagacaggaagaaagccctattacatgctaaataaagataa  |
| Pmv14    | ctcaccacaccttagctatcagaagatgagggcacttctagacagAaaagaaagccctattacatgctaaataaagataa |
| Pmv15    | ctcaccacaccttagctatcagaagatgagggcacttctagacaggaagaaagccctattacatgctaaataaagataa  |
| Pmv16    | ctcaccacaccttagctatcagaagatgagggcacttctagacaggaagaaagccctattacatgctaaataaagataa  |
| Pmv17    | ctcaccacaccttagctatcagaagatgagggcacttctagacaggaagaaagccctattacatgctaaataaagataa  |
| Pmv18    | ctcaccacaccttagctatcagaagatgagggcacttctagacaggaAaaagccctattacatgctaaataaagataa   |
| Pmv19    | ctcaccacaccttagctatcagaagatgagggcacttctagacaggaagaaagccctattacatgctaaataaagataa  |
| Pmv2     | ctcaccacaccttagctatcagaagatgagggcacttctagacaggaagaaagccctattacatgctaaataaagataa  |
| Pmv20    | ctcaccacaccttagctatcagaagatgagggcacttctagacaggaagaaagccctattacatgctaaataaagataa  |
| Pmv21    | ctcaccacaccttagctatcagaagatgagggcacttctagacaggaagaaagccctattacatgctaaataaagataa  |
| Pmv22    | ctcaccacaccttagctatcagaagatgagggcacttctagacaggaagaaagccctattacatgctaaataaagataa  |
| Pmv23    | ctcaccacaccttagctatcagaagatgagggcacttctagacaggaagaaagccctattacatgctaaataaagataa  |
| Pmv24    | ctcaccacaccttagctatcagaagatgagggcacttctagacaggaagaaagccctattacatgctaaataaagataa  |
| Pmv4     | ctcaccacaccttagctatcagaagatAagggcacttctagacAgaagaaagccctattacatgctaaataaagataa   |
| Pmv5     | ctcaccacaccttagctatcagaagatgagggcacttctagacaggaagaaagccctattacatgctaaataaagataa  |
| Pmv6     | ctcaccacaccttagctatcagaagatgagggcacttctagacaggaagaaagccctattacatgctaaataaagataa  |
| Pmv7     | ctcaccacaccttagctatcagaagatgagggcacttctagacaggaagaaagccctattacatgctaaataaagataa  |
| Pmv8     | -----                                                                            |
| Pmv9     | ctcaccacaccttagctatcagaagatgagggcacttctagacaggaagaaagccctattacatgctaaataaagataa  |



|          |                                                                                     |
|----------|-------------------------------------------------------------------------------------|
| PMV_CONS | CTCCTGGTATTCTGTTGACACGTTCTCTGGCTGGGTTGAAGCCTTCCCAACCAAACATGAGACTGCCAAAAATAGTGACCAA  |
| Pmv1     | ctcctgggtattcgtggacacgttctctggctgggttgaagccttcccaaccaaacaatgagactgccaaaaatagtgaccaa |
| Pmv10    | ctcctgggtattcgtggacacgttctctggctgggttgaagccttcccaaccaaacaatgaAactgccaaaaatagtgaccaa |
| Pmv11    | ctcctgggtattcgtggacacgttctctggctgggttgaagccttcccaaccaaacaatgagactgccaaaaatagtgaccaa |
| Pmv12    | ctcctgggtattcgtggacacgttctctggctgggttgaagccttcccaaccaaacaatgagactgccaaaaatagtgaccaa |
| Pmv13    | ctcctgggtattcgtggacacgttctctggctgggttgaagccttcccaaccaaacaatgaAactgccaaaaatagtgaccaa |
| Pmv14    | ctcctgggtattcgtggacacgttctctggctgggttgaagccttcccaaccaaacaatgagactgccaaaaatagtgaccaa |
| Pmv15    | ctcctgggtattcgtggacacgttctctggctgggttgaagccttcccaaccaaacaatgagactgccaaaaatagtgaccaa |
| Pmv16    | ctcctgggtattcgtggacacgttctctggctgggttgaagccttcccaaccaaacaatgagactgccaaaaatagtgaccaa |
| Pmv17    | ctcctgggtattcgtggacacgttctctggctgggttgaagccttcccaaccaaacaatgagactgccaaaaatagtgaccaa |
| Pmv18    | ctcctgggtattcgtggacacgttctctggctgggttgaagccttcccaaccaaacaatgagactgccaaaaatagtgaccaa |
| Pmv19    | ctcctgggtattcgtggacacgttctctggctgggttgaagccttcccaaccaaacaatgagactgccaaaaatagtgaccaa |
| Pmv2     | ctcctgggtattcgtggacacgttctctggctgggttgaagccttcccaaccaaacaatgagactgccaaaaatagtgaccaa |
| Pmv20    | ctcctgggtattcgtggacacgttctctggctgggttgaagccttcccaaccaaacaatgagactgccaaaaatagtgaccaa |
| Pmv21    | ctcctgggtattcgtggacacgttctctggctgggttAaagccttcccaaccaaacaatgagactgccaaaaatagtgaccaa |
| Pmv22    | ctcctgggtattcgtggacacgttctctggctgggttgaagccttcccaaccaaacaatgagactgccaaaaatagtgaccaa |
| Pmv23    | ctcctgggtattcgtggacacgttctctggctgggttgaagccttcccaaccaaacaatgaAactgccaaaaatagtgaccaa |
| Pmv24    | ctcctgggtattcgtggacacgttctctggctgggttgaagccttcccaaccaaacaatgagactgccaaaaatagtgaccaa |
| Pmv4     | ctcctgggtattcgtgAacacgttctctggctgggttAaagccttcccaaccaaacaatgagactgccaaaaatagtgaccaa |
| Pmv5     | ctcctgggtattcgtggacacgttctctggctgggttgaagccttcccaaccaaacaatgagactgccaaaaatagtgaccaa |
| Pmv6     | ctcctgggtattcgtggacacgttctctggctgggttgaagccttcccaaccaaacaatgaAactgccaaaaatagtgaccaa |
| Pmv7     | ctcctgggtattcgtggacacgttctctggctgggttgaagccttcccaaccaaacaatgagactgccaaaaatagtgaccaa |
| Pmv8     | -----                                                                               |
| Pmv9     | ctcctgggtattcgtggacacgttctctggctgggttgaagccttcccaaccaaacaatgagactgccaaaaatagtgaccaa |

|          |                                                                                    |
|----------|------------------------------------------------------------------------------------|
| PMV_CONS | GAAACTTCTGGAAGAAATATTTCCAAGGTTTGGAAATGCCCAAGTGTGGGGACTGATAATGGGCCTGCCTTCGTCTCCC    |
| Pmv1     | gaaacttctggaagaaatatttccaaggtttggaatgcccccaagtgttggggactgataatgggcctgccttcgtctccc  |
| Pmv10    | gaaacttctggaagaaatatttccaaggtttggaatgcccccaagtgttggggactgataatgggcctgccttcgtctccc  |
| Pmv11    | gaaacttctggaagaaatatttccaaggtttggaatgcccccaagtgttggggactgataatgggcctgccttcgtctccc  |
| Pmv12    | gaaacttctggaagaaatatttccaaggtttggaatgcccccaagtgttggggactgataatgggcctgccttcgtctccc  |
| Pmv13    | gaaacttctggaagaaatatttccaaggtttggaatgcccccaagtgttggggactgataatgggcctgccttcgtctccc  |
| Pmv14    | gaaacttctggaaAaaatatttccaaggtttggaatgcccccaagtgttggggactgataatgggcctgccttcgtctccc  |
| Pmv15    | gaaacttctggaagaaatatttccaaggtttggaatgcccccaagtgttggggactgataatgggcctgccttcgtctccc  |
| Pmv16    | gaaacttctggaagaaatatttccaaggtttggaatgcccccaagtgttggggactgataatgggcctgccttcgtctccc  |
| Pmv17    | gaaacttctgAaagaaatatttccaaggtttggaatgcccccaagtgttggggactgataatgggcctgccttcgtctccc  |
| Pmv18    | gaaacttctggaagaaatatttccaaggtttAgaatgcccccaagtgttggggactgataatgggcctgccttcgtctccc  |
| Pmv19    | gaaacttctggaagaaatatttccaaggtttggaatgcccccaagtgttggggactgataatgggcctgccttcgtctccc  |
| Pmv2     | gaaacttctggaagaaatatttccaaggtttggaatgcccccaagtgttggggactgataatgggcctgccttcgtctccc  |
| Pmv20    | gaaacttctggaagaaatatttccaaggtttggaatgcccccaagtgttggggactgataatgggcctgccttcgtctccc  |
| Pmv21    | gaaacttctggaagaaatatttccaaggtttggaatgcccccaagtgttggggactgataatgggcctgccttcgtctccc  |
| Pmv22    | gaaacttctggaagaaatatttccaaggtttggaatgcccccaagtgttggggactgataatgggcctgccttcgtctccc  |
| Pmv23    | gaaacttctggaaAaaatatttccaaggtttAgaatgcccccaagtgttggggactgataatgggcctgccttcgtctccc  |
| Pmv24    | gaaacttctggaaAaaatatttccaaggtttggaatgcccccaagtgttggggactgataatgggcctgccttcgtctccc  |
| Pmv4     | gaaacttctgAaaAaaatatttccaaAggtttAAaatgcccccaagtgttggggactgataatgggcctgccttcgtctccc |
| Pmv5     | gaaacttctggaagaaatatttccaaggtttggaatgcccccaagtgttggggactgataatgggcctgccttcgtctccc  |
| Pmv6     | gaaacttctggaagaaatatttccaaggtttggaatgcccccaagtgttggggactgataatgggcctgccttcgtctccc  |
| Pmv7     | gaaacttctggaagaaatatttccaaggtttggaatgcccccaagtgttggggactgataatgggcctgccttcgtctccc  |
| Pmv8     | -----tgccttcgtctccc                                                                |
| Pmv9     | gaaacttctggaaAaaatatttccaaggtttggaatgcccccaagtgttggggactgataatgggcctgccttcgtctccc  |





|          |                                                                                    |
|----------|------------------------------------------------------------------------------------|
| PMV_CONS | CTCCAAGCAGTACAACGAGAGGTCCTGGAAGCCACTGGCCGCTGCCTATCAGGACCAGCTGGACCAGCCAGTGATACCACA  |
| Pmv1     | ctccaagcagtacaacgagaggtctggaagccactggccgctgcctatcaggacTtagctggaccagccagtgataaccaca |
| Pmv10    | ctccaagcagtacaacgagaggtctggaagccactggccgctgcctatcaggaccagctggaccagccagtgataaccaca  |
| Pmv11    | ctccaagcagtacaacgagaggtctggaagccactggccgctgcctatcaggaccagctggaccagccagtgataaccaca  |
| Pmv12    | ctccaagcagtacaacgagaggtctggaagccactggccgctgcctatcaggaccagctggaccagccagtgataaccaca  |
| Pmv13    | ctccaagcagtacaacgagaggtctggaagccactggccgctgcctatcaggaccagctggaccagccagtgataaccaca  |
| Pmv14    | ctccaagcagtacaacgagaggtctggaagccactggccgctgcctatcaggaccagctAgaccagccagtgataaccaca  |
| Pmv15    | ctccaagcagtacaacgagaggtctggaagccactggccgctgcctatcaggaccagctggaccagccagtgataaccaca  |
| Pmv16    | ctccaagcagtacaacgagaggtctggaagccactggccgctgcctatcaggaccagctggaccagccagtgataaccaca  |
| Pmv17    | ctccaagcagtacaacgagaggtctggaagccactggccgctgcctatcaggaccagcAggaccagccagtgataaccaca  |
| Pmv18    | ctccaagcagtacaacgagaggtctggaagccactggccgctgcctatcaggaccagctggaccagccagtgataaccaca  |
| Pmv19    | ctccaagcagtacaacgagaggtctggaagccactggccgctgcctatcaggaccagctggaccagccagtgataaccaca  |
| Pmv2     | ctccaagcagtacaacgagaggtctggaagccactggccgctgcctatcaggaccagctggaccagccagtgataaccaca  |
| Pmv20    | ctccaagcagtacaacgagaggtctggaagccactggccgctgcctatcaggaccagctggaccagccagtgataaccaca  |
| Pmv21    | ctccaagcagtacaacgagaggtctggaagccactggccgctgcctatcaggaccagctggaccagccagtgataaccaca  |
| Pmv22    | ctccaagcagtacaacgagaggCctggaagccactggccgctgcctatcaggaccagctggaccagccagtgataaccaca  |
| Pmv23    | ctccaagcagtacaacgagaggtctggaagccactggccgctgcctatcaggaccagctggaccagccagtgataaccaca  |
| Pmv24    | ctccaagcagtacaacgagaggtctggaagccactggccgctgcctatcaggaccagctggaccagccagtgataaccaca  |
| Pmv4     | ctccaagcagtacaacgagaggtctAgaagccactggccgctgcctatcaggaccagctggaccagccagtAataaccaca  |
| Pmv5     | ctccaagcagtacaacgagaggtctggaagccactggccgctgcctatcaggaccagctggaccagccagtgataaccaca  |
| Pmv6     | ctccaagcagtacaacgagaggtctggaagccactggccgctgcctatcaggaccagctggaccagccagtgataaccaca  |
| Pmv7     | ctccaagcagtacaacgagaggtctggaagccactggccgctgcctatcaggaccagctggaccagccagtgataaccaca  |
| Pmv8     | ctccaagcagtacaacgagaggtctggaagccactggccgctgcctatcaggaccagctggaccagccagtgataaccaca  |
| Pmv9     | ctccaagcagtacaacgagaggtctggaagccactggccgctgcctatcaggaccagctggaccagccagtgataaccaca  |

  

|          |                                                                                    |
|----------|------------------------------------------------------------------------------------|
| PMV_CONS | CCCCTTCGGTGTGCGGACACCGTGTGGGTACGCCGGCACCAGACTAAGAACTTGGAACCTCGCTGGAAAGGACCTACA     |
| Pmv1     | ccccttcggtgtcggcgacaccgtgtgggtacgccggcaccagactaagaacttggaaacctcgctggaaaggacacctaca |
| Pmv10    | ccccttcggtgtcggcgacaccgtgtgggtacgccggcaccagactaagaacttggaaacctcgctggaaaggacacctaca |
| Pmv11    | ccccttcggtgtcggcgacaccgtgtgggtacgccggcaccagactaagaacttggaaacctcgctggaaaggacacctaca |
| Pmv12    | ccccttcggtgtcggcgacaccgtgtgggtacgccggcaccagactaagaacttggaaacctcgctggaaaggacacctaca |
| Pmv13    | ccccttcggtgtcggcgacaccgtgtgggtacgccggcaccagactaagaacttggaaacctcgctggaaaggacacctaca |
| Pmv14    | ccccttcggtgtcggcgacaccgtgtgggtacgccggcaccagactaaAaacttggaaacctcgctggaaaggacacctaca |
| Pmv15    | ccccttcggtgtcggcgacaccgtgtgggtacgccggcaccagactaagaacttggaaacctcgctggaaaggacacctaca |
| Pmv16    | ccccttcggtgtcggcgacaccgtgtgggtacgccggcaccagactaagaacttggaaacctcgctggaaaggacacctaca |
| Pmv17    | ccccttcggtgtAggcgacaccgtgtgggtacgccggcaccagactaagaacttggaaacctcgctggaaaggacacctaca |
| Pmv18    | ccccttcggtgtcggcgacaccgtgtgggtacgccggcaccagactaagaacttggaaacctcgctggaaaggacacctaca |
| Pmv19    | ccccttcggtgtcggcgacaccgtgtgggtacgccggcaccagactaagaacttggaaacctcgctggaaaggacacctaca |
| Pmv2     | ccccttcggtgtcggcgacaccgtgtgggtacgccggcaccagactaagaacttggaaacctcgctggaaaggacacctaca |
| Pmv20    | ccccttcggtgtcggcgacaccgtgtgggtacgccggcaccagactaagaacttggaaacctcgctggaaaggacacctaca |
| Pmv21    | ccccttcggtgtcggcgacaccgtgtgggtacgccggcaccagactaagaacttggaaacctcgctAgaaggacacctaca  |
| Pmv22    | ccccttcggtgtcggcgacaccgtgtgggtacgccggcaccagactaagaacttggaaacctcgctggaaaggacacctaca |
| Pmv23    | ccccttcggtgtcggcgacaccgtgtgggtacgccggcaccagactaagaacttggaaacctcgctggaaaggacacctaca |
| Pmv24    | ccccttcggtgtcggcgacaccgtgtgggtacgccggcaccagactaagaacttggaaacctcgctggaaaggacacctaca |
| Pmv4     | ccccttcggtgtcggcgacaccgtgtgggtacgccggcaccagactaagaacttAgaacctcgctAAaaaaggacacctaca |
| Pmv5     | ccccttcggtgtcggcgacaccgtgtgggtacgccggcaccagactaagaacttggaaacctcgctggaaaggacacctaca |
| Pmv6     | ccccttcggtgtcggcgacaccgtgtgggtacgccggcaccagactaagaacttggaaacctcgctggaaaggacacctaca |
| Pmv7     | ccccttcggtgtcggcgacaccgtgtgggtacgccggcaccagactaagaacttggaaacctcgctggaaaggacacctaca |
| Pmv8     | ccccttcggtgtcggcgacaccgtgtgggtacgccggcaccagactaaAaacttggaaacctcgctggaaaggacacctaca |
| Pmv9     | ccccttcggtgtcggcgacaccgtgtgggtacgccggcaccagactaagaacttggaaacctcgctggaaaggacacctaca |







|          |                                                                                     |
|----------|-------------------------------------------------------------------------------------|
| PMV_CONS | CATTTGACTTCTATGTTTGCCCCGGGCATACTGTACCAACAGGGTGTGGAGGGCCGAGAGAGGGCTACTGTGGCAAATGG    |
| Pmv1     | catttgacttctatgtttgccccgggcatactgtaccaacaggggtgtggaggggccgagagaggggctactgtggcaaatgg |
| Pmv10    | catttgacttctatgtttgccccgggcatactgtaccaacaggggtgtggaggggccgagagaggggctactgtggcaaatgg |
| Pmv11    | catttgacttctatgtttgccccgggcatactgtaccaacaggggtgtggaggggccgagagaggggctactgtggcaaatgg |
| Pmv12    | catttgacttctatgtttgccccgggcatactgtaccaacaggggtgtggaggggccgagagaggggctactgtggcaaatgg |
| Pmv13    | catttgacttctatgtttgccccgggcatactgtaccaacaggggtgtggaggggccgagagaggggctactgtggcaaatgg |
| Pmv14    | catttgacttctatgtttgccccgggcatactgtaccaacaggggtgtggaggggccgagagaggggctactgtggcaaatgg |
| Pmv15    | catttgacttctatgtttgccccgggcatactgtaccaacaggggtgtggaggggccgagagaggggctactgtggcaaatgg |
| Pmv16    | catttgacttctatgtttgccccgggcatactgtaccaacaggggtgtggaggggccgagagaggggctactgtggcaaatgg |
| Pmv17    | catttgacttctatgtttgccccgggcatactgtaccaacaggggtgtggaggggccgagagaggggctactgtggcaaatgg |
| Pmv18    | -----                                                                               |
| Pmv19    | catttgacttctatgtttgccccgggcatactgtaccaacaggggtgtggaggggccgagagaggggctactgtggcaaatgg |
| Pmv2     | catttgacttctatgtttgccccgggcatactgtaccaacaggggtgtggaggggccgagagaggggctactgtggcaaatgg |
| Pmv20    | catttgacttctatgtttgccccgggcatactgtaccaacaggggtgtggaggggccgagagaggggctactgtggcaaatgg |
| Pmv21    | catttgacttctatgtttgccccgggcatactgtaccaacaggggtgtAgaggggccgagagaggggctactgtggcaaatgg |
| Pmv22    | catttgacttctatgtttgccccgggcatactgtaccaacaggggtgtggaggggccgagagaggggctactgtggcaaatgg |
| Pmv23    | catttgacttctatgtttgccccgggcatactgtaccaacaggggtgtggaggggccgagagaggggctactgtggcaaatgg |
| Pmv24    | catttgacttctatgtttgccccgggcatactgtaccaacaggggtgtggaggggccgagagaggggctactgtggcaaatgg |
| Pmv4     | catttgacttctatgtttgccccgggcatactgtaccaacaggggtgtAgaggggccgAaAaggggctactgtggcaaatgg  |
| Pmv5     | catttgacttctatgtttgccccgggcatactgtaccaacaggggtgtggaggggccgagagaggggctactgtggcaaatgg |
| Pmv6     | catttgacttctatgtttgccccgggcatactgtaccaacaggggtgtggaggggccgagagaggggctactgtggcaaatgg |
| Pmv7     | catttgacttctatgtttgccccgggcatactgtaccaacaggggtgtggaggggccgagagaggggctactgtggcaaatgg |
| Pmv8     | catttgacttctatgtttgccccgggcatactgtaccaacaggggtgtggaggggccgagagaggggctactgtggcaaatgg |
| Pmv9     | catttgacttctatgtttgccccgggcatactgtaccaacaggggtgtggaggggccgagagaggggctactgtggcaaatgg |
| PMV_CONS | GGCTGTGAGACCACTGGACAGGCATACTGGAAGCCATCATCATCATGGGACCTAATTTCCTTAAGCGAGGAAACACCCC     |
| Pmv1     | ggctgtgagaccactggacaggcatactggaagccatcatcatcatgggacctaatttcccttaagcgaggaaacaccccc   |
| Pmv10    | ggctgtgagaccactggacaggcatactggaagccatcatcatcatgggacctaatttcccttaagcgaAgaacaccccc    |
| Pmv11    | ggctgtgagaccactggacaggcatactggaagccatcatcatcatgggacctaatttcccttaagcgaggaaacaccccc   |
| Pmv12    | ggctgtgagaccactggacaggcatactggaagccatcatcatcatgggacctaatttcccttaagcgaggaaacaccccc   |
| Pmv13    | ggctgtgagaccactggacaggcatactggaagccatcatcatcatgggacctaatttcccttaagcgaAgaacaccccc    |
| Pmv14    | ggctgtgagaccactggacaggcatactggaagccatcatcatcatgggacctaatttcccttaagcgaggaaacaccccc   |
| Pmv15    | ggctgtgagaccactggacaggcatactggaagccatcatcatcatgggacctaatttcccttaagcgaggaaacaccccc   |
| Pmv16    | ggctgtgagaccactggacaggcatactggaagccatcatcatcatgggacctaatttcccttaagcgaggaaacaccccc   |
| Pmv17    | ggctgtgagaccactggacaggcatactggaagccatcatcatcatgggacctaatttcccttaagcgagAgaacaccccc   |
| Pmv18    | -----                                                                               |
| Pmv19    | ggctgtgagaccactggacaggcatactggaagccatcatcatcatgggacctaatttcccttaagcgaggaaacaccccc   |
| Pmv2     | ggctgtgagaccactggacaggcatactggaagccatcatcatcatgggacctaatttcccttaagcgaggaaacaccccc   |
| Pmv20    | ggctgtgagaccactggacaggcatactggaagccatcatcatcatgggacctaatttcccttaagcgaggaaacaccccc   |
| Pmv21    | ggctgtgagaccactggacaggcatactggaagccatcatcatcatgggacctaatttcccttaagcgaggaaacaccccc   |
| Pmv22    | ggctgtgagaccactggacaggcatactggaagccatcatcatcatgggacctaatttcccttaagcgaggaaacaccccc   |
| Pmv23    | ggctgtgagaccactggacaggcatactggaagccatcatcatcatgggacctaatttcccttaagcgaAgaacaccccc    |
| Pmv24    | ggctgtgagaccactggacaggcatactggaagccatcatcatcatgggacctaatttcccttaagcgaggaaacaccccc   |
| Pmv4     | ggctgtgagaccactggacaggcatactggaagccatcatcatcatgggacctaatttcccttaagcgaAgaacaccccc    |
| Pmv5     | ggctgtgagaccactggacaggcatactggaagccatcatcatcatgggacctaatttcccttaagcgaggaaacaccccc   |
| Pmv6     | ggctgtgagaccactggacaggcatactggaagccatcatcatcatgggacctaatttcccttaagcgaggaaacaccccc   |
| Pmv7     | ggctgtgagaccactggacaggcatactggaagccatcatcatcatgggacctaatttcccttaagcgaggaaacaccccc   |
| Pmv8     | ggctgtgagaccactggacaggcatactggaagccatcatcatcatgggacctaatttcccttaagcgaggaaacaccccc   |
| Pmv9     | ggctgtgagaccactggacaggcatactggaagccatcatcatcatgggacctaatttcccttaagcgaggaaacaccccc   |

|          |                                                                                   |
|----------|-----------------------------------------------------------------------------------|
| PMV_CONS | TCGGAATCAGGGCCCCCTGTTATGATTCTCAGCGGTCTCCAGTGACATCAAGGGCGCCACACCGGGGGTTCGATGCAATC  |
| Pmv1     | tcggaatcagggccctgttatgattcctcagcgggtctccagtgacatcaagggcgccacacccggggggtcgatgcaatc |
| Pmv10    | tcAgaatcagggccctgttatgattcctcagcgggtctccagtgacatcaagggcgccacacccggggggtcgatgcaatc |
| Pmv11    | tcggaatcagggccctgttatgattcctcagcgggtctccagtgacatcaagggcgccacacccggggggtcgatgcaatc |
| Pmv12    | tcggaatcagggccctgttatgattcctcagcgggtctccagtgacatcaagggcgccacacccggggggtcgatgcaatc |
| Pmv13    | tcAgaatcagggccctgttatgattcctcagcgggtctccagtgacatcaagggcgccacacccggggggtcgatgcaatc |
| Pmv14    | tcggaatcagggccctgttatgattcctcagcgggtctccagtgacatcaagggcgccacacccggggggtcgatgcaatc |
| Pmv15    | tcggaatcagggccctgttatgattcctcagcgggtctccagtgacatcaagggcgccacacccggggggtcgatgcaatc |
| Pmv16    | tcggaatcagggccctgttatgattcctcagcgggtctccagtgacatcaagggcgccacacccggggggtcgatgcaatc |
| Pmv17    | tcggaatcagggccctgttatgattcctcagcgggtctccagtgacatcaagggcgccacacccggggggtcgatgcaatc |
| Pmv18    | -----                                                                             |
| Pmv19    | tcggaatcagggccctgttatgattcctcagcgggtctccagtgacatcaagggcgccacacccggggggtcgatgcaatc |
| Pmv2     | tcAgaatcagggccctgttatgattcctcagcgggtctccagtgacatcaagggcgccacacccggggggtcgatgcaatc |
| Pmv20    | tcggaatcagggccctgttatgattcctcagcgggtctccagtgacatcaagggcgccacacccggggggtcgatgcaatc |
| Pmv21    | tcggaatcagggccctgttatgattcctcagcgggtctccagtgacatcaagggcgccacacccggggggtcgatgcaatc |
| Pmv22    | tcggaatcagggccctgttatgattcctcagcgggtctccagtgacatcaagggcgccacacccggggggtcgatgcaatc |
| Pmv23    | tcAgaatcagggccctgttatgattcctcagcgggtctccagtgacatcaagggcgccacacccggggggtcgatgcaatc |
| Pmv24    | tcggaatcagggccctgttatgattcctcagcgggtctccagtgacatcaagggcgccacacccggggggtcgatgcaatc |
| Pmv      | tcAgaatcagggccctgttatgattcctcagcgggtctccagtgacatcaagggcgccacacccggggggtcgatgcaatc |
| Pmv5     | tcggaatcagggccctgttatgattcctcagcgggtctccagtgacatcaagggcgccacacccggggggtcgatgcaatc |
| Pmv6     | tcggaatcagggccctgttatgattcctcagcgggtctccagtgacatcaagggcgccacacccggggggtcgatgcaatc |
| Pmv7     | tcggaatcagggccctgttatgattcctcagcgggtctccagtgacatcaagggcgccacacccggggggtcgatgcaatc |
| Pmv8     | tcggaatcagggccctgttatgattcctcagcgggtctccagtgacatcaagggcgccacacccggggggtcgGtgaatc  |
| Pmv9     | tcggaatcagggccctgttatgattcctcagcgggtctccagtgacatcaagggcgccacacccggggggtcgatgcaatc |

  

|          |                                                                                               |
|----------|-----------------------------------------------------------------------------------------------|
| PMV_CONS | CCCTAGTCCTGGAATTCAC TGACGCGGGCAAAAAGGCCAGCTGGGATGGCCCCAAAGTATGGGGACTAAGACTGTACCGA             |
| Pmv1     | ccctagtcttgaattcactgacgcgggcaaaaaggccagctgggatggccccaaagtatggggactaagactgtaccga               |
| Pmv10    | ccctagtcttgaattcactgacgcgggcaaaaaggccagctgggatggccccaaagtatggggactaagactgtaccga               |
| Pmv11    | ccctagtcttgaattcactgacgcgggcaaaaaggccagctgggatggccccaaagtatggggactaagactgtaccga               |
| Pmv12    | ccctagtcttgaattcactgacgcgggcaaaaaggccagctgggatggccccaaagtatggggactaagactgtaccga               |
| Pmv13    | ccctagtcttgaattcactgacgcgggcaaaaaggccagctgggatggccccaaagtatggggactaagactgtaccga               |
| Pmv14    | ccctagtcttgaattcactgacgcgggcaaaaaggccagctgggatggccccaaagtatggggactaagactgtaccga               |
| Pmv15    | ccctagtcttgaattcactgacgcgggcaaaaaggccagctgggatggccccaaagtatggggactaagactgtaccga               |
| Pmv16    | ccctagtcttgaattcactgacgcgggcaaaaaggccagctgggatggccccaaagtatggggactaagactgtaccga               |
| Pmv17    | ccctagtcttgaattcactgacgcgggcaaaaaggccagctgggatggccccaaagtatggggactaagactgtaccga               |
| Pmv18    | -----aaggccagctgggatggccccaaagtatggggactaagactgtaccga                                         |
| Pmv19    | ccctagtcttgaattcactgacgcgggcaaaaaggccagctgggatggccccaaagtatggggactaagactgtaccga               |
| Pmv2     | ccctagtcttgaattcactgacgcgggcaaaaaggccagctgggatggccccaaagtatggggactaagactgtaccga               |
| Pmv20    | ccctagtcttgaattcactgacgcgggcaaaaaggccagctgggatggccccaaagtatggggactaagactgtaccga               |
| Pmv21    | ccctagtcttgaattcactgacgcgggcaaaaaggccagctgAagatggccccaaagtatggggactaagactgtaccga              |
| Pmv22    | ccctagtcttgaattcactgacgcgggcaaaaaggccagctgggatggccccaaagtatggggactaagactgtaccga               |
| Pmv23    | ccctagtcttgaattcactgacgcgggcaaaaaggccagctgggatggccccaaagtatggggactaagactgtaccga               |
| Pmv24    | ccctagtcttgaattcactgacAacgggcaaaaaggccagctgggatggccccaaagtatggggactaagactgtaccga              |
| Pmv      | ccctagtcttgaattcactgacAAaattcactgacgcgggcaaaaaggccagctgggatggccccaaagtatA-Aagactaagactgtaccga |
| Pmv5     | ccctagtcttgaattcactgacgcgggcaaaaaggccagctgggatggccccaaagtatggggactaagactgtaccga               |
| Pmv6     | ccctagtcttgaattcactAacgcgggcaaaaaggccagctgggatggccccaaagtatggggactaagactgtaccga               |
| Pmv7     | ccctagtcttgaattcactgacgcgggcaaaaaggccagctgggatggccccaaagtatggggactaagactgtaccga               |
| Pmv8     | ccctagtcttgaattcactgacgcgggcaaaaaggccagctgggatggccccaaagtatggggactaagactgtaccga               |
| Pmv9     | ccctagtcttgaattcactgacgcgggcaaaaaggccagctgggatggccccaaagtatggggactaagactgtaccga               |

| PMV_CONS | TCCACAGGGACCGACCCGGTGACCCGGTTCTCTTTGACCCGCCAGGTCTCTCAATATAGGGCCCCCGCGTCCCCATTGGGCC |
|----------|------------------------------------------------------------------------------------|
| Pmv1     | tccacagggaccgacccggtgacccggttctctttgacccgccaggtcctcaatatagggcccccggtccccattggggc   |
| Pmv10    | tccacagggaccgacccggtgacccggttctctttgacccgccaggtcctcaatatagggcccccggtccccattggggc   |
| Pmv11    | tccacagggaccgacccggtgacccggttctctttgacccgccaggtcctcaatatagggcccccggtccccattggggc   |
| Pmv12    | tccacagggaccgacccggtgacccggttctctttgacccgccaggtcctcaatatagggcccccggtccccattggggc   |
| Pmv13    | tccacagggaccgacccggtgacccggttctctttgacccgccaggtcctcaatatagggcccccggtccccattggggc   |
| Pmv14    | tccacagggaccgacccggtgacccggttctctttgacccgccaggtcctcaatatagggcccccggtccccattggggc   |
| Pmv15    | tccacagggaccgacccggtgacccggttctctttgacccgccaggtcctcaatatagggcccccggtccccattggggc   |
| Pmv16    | tccacagggaccgacccggtgacccggttctctttgacccgccaggtcctcaatatagggcccccggtccccattggggc   |
| Pmv17    | tccacagggaccgacccggtgacccggttctctttgacccgccaggtcctcaatatagggcccccggtccccattggggc   |
| Pmv18    | tccacagggaccgacccggtgacccggttctctttgacccgccaggtcctcaatatagggcccccggtccccattggggc   |
| Pmv19    | tccacagggaccgacccggtgacccggttctctttgacccgccaggtcctcaatatagggcccccggtccccattggggc   |
| Pmv2     | tccacagggaccgacccggtgacccggttctctttgacccgccaggtcctcaatatagggcccccggtccccattggggc   |
| Pmv20    | tccacagggaccgacccggtgacccggttctctttgacccgccaggtcctcaatatagggcccccggtccccattggggc   |
| Pmv21    | tccacagggaccgacccggtgacccggttctctttgacccgccaggtcctcaatatagggcccccggtccccattggggc   |
| Pmv22    | tccacagggaccgacccggtgacccggttctctttgacccgccaggtcctcaatatagggcccccggtccccattggggc   |
| Pmv23    | tccacagggaccgacccggtgacccggttctctttgacccgccaggtcctcaatatagggcccccggtccccattggggc   |
| Pmv24    | tccacagggaccgacccggtgacccggttctctttgacccgccaggtcctcaatatagggcccccggtccccattggggc   |
| Pmv4     | tccacagggaccgacccggtgacccggttctctttgacccgccaggtcctcaatatagggcccccggtccccattggggc   |
| Pmv5     | tccacagggaccgacccggtgacccggttctctttgacccgccaggtcctcaatatagggcccccggtccccattggggc   |
| Pmv6     | tccacagggaccgacccggtgacccggttctctttgacccgccaggtcctcaatatagggcccccggtccccattggggc   |
| Pmv7     | tccacagggaccgacccggtgacccggttctctttgacccgccaggtcctcaatatagggcccccggtccccattggggc   |
| Pmv8     | tccacagggaccgacccggtgacccggttctctttgacccgccaggtcctcaatatagggcccccggtccccattggggc   |
| Pmv9     | tccacagggaccgacccggtgacccggttctctttgacccgccaggtcctcaatatagggcccccggtccccattggggc   |







|          |                                                                                    |
|----------|------------------------------------------------------------------------------------|
| PMV_CONS | ACTCCCCTGGTTATGTTTATGGCCAGTTTGAGAGAAAAACCAAATATAAAAGAGAGCCGGTGTTCATTAACCTCTGGCCCTG |
| Pmv1     | actccctcggttatgtttatggccagtttgagaAaaaaaccaaataaaaagagagccggtgtcattaactctggccctg    |
| Pmv10    | actccctcggttatgtttatggccagtttgagagaaaaaccaaataaaaagagagccggtgtcattaactctggccctg    |
| Pmv11    | actccctcggttatgtttatggccagtttgagaAaaaaaccaaataaaaagagagccggtgtcattaactctggccctg    |
| Pmv12    | actccctcggttatgtttatggccagtttgagaAaaaaaccaaataaaaagagagccggtgtcattaactctggccctg    |
| Pmv13    | actccctcggttatgtttatggccagtttgagagaaaaaccaaataaaaagagagccggtgtcattaactctggccctg    |
| Pmv14    | actccctcggttatgtttatggccagtttgagagaaaaaccaaataaaaagagagccggtgtcattaactctggccctg    |
| Pmv15    | actccctcggttatgtttatggccagtttgagagaaaaaccaGatataaaaagagagccggtgtcattaactctggccctg  |
| Pmv16    | actccctcggttatgtttatggccagtttgagaAaaaaaccaaataaaaagagagccggtgtcattaactctggccctg    |
| Pmv17    | actccctcggttatgtttatggccagtttgagagaaaaaccaaataaaaagagagccggtgtcattaactctggccctg    |
| Pmv18    | actccctcggttatgtttatggccagtttgagagaaaaaccaaataaaaagagagccggtgtcattaactctggccctg    |
| Pmv19    | actccctcggttatgtttatggccagtttgagagaaaaaccaaataaaaagagagccggtgtcattaactctggccctg    |
| Pmv2     | actccctcggttatgtttatggccagtttgagagaaaaaccaaataaaaagagagccggtgtcattaactctggccctg    |
| Pmv20    | actccctcggttatgtttatggccagtttgagagaaaaaccaaataaaaagagagccggtgtcattaactctggccctg    |
| Pmv21    | actccctcggttatgtttatggccagtttgagaAaaaaaccaaataaaaagagagccggtgtcattaactctggccctg    |
| Pmv22    | actccctcggttatgtttatggccagtttgagagaaaaaccaaataaaaagagagccggtgtcattaactctggccctg    |
| Pmv23    | actccctcggttatgtttatggccagtttgagagaaaaaccaaataaaaagagagccggtgtcattaactctggccctg    |
| Pmv24    | actccctcggttatgtttatggccagtttgagagaaaaaccaaataaaaagagagccggtgtcattaactctggccctg    |
| Pmv4     | actccctcAgttatgtttatggccagtttgaaAaaaaaccaaataaaaagagagccggtgtcattaactctggccctg     |
| Pmv5     | actccctcggttatgtttatggccagtttgagaAaaaaaccaaataaaaagagagccggtgtcattaactctggccctg    |
| Pmv6     | actccctcggttatgtttatggccagtttgagagaaaaaccaaataaaaagagagccggtgtcattaactctggccctg    |
| Pmv7     | actccctcggttatgtttatggccagtttgagaAaaaaaccaaataaaaagagagccggtgtcattaactctggccctg    |
| Pmv8     | actccctcggttatgtttatggccagtttgagagaaaaaccaaataaaaagagagccggtgtcattaactctggccctg    |
| Pmv9     | actccctcggttatgtttatggccagtttgagagaaaaaccaaataaaaagagagccggtgtcattaactctggccctg    |

  

|          |                                                                                     |
|----------|-------------------------------------------------------------------------------------|
| PMV_CONS | CTGTTGGGAGGACTTACTATGGGCGGCATAGCTGCAGGAGTAGGAACCGGGACTACAGCCCTAGTGGCCACCAACAATT     |
| Pmv1     | ctggttgggaggacttactatgggcggcatagtgcaggagtaggaaccgggactacagccctagtggccaccaaacaatt    |
| Pmv10    | ctggttgggaggacttactatgggcggcatagtgcaggagtaggaaccgggactacagccctagtggccaccaaacaatt    |
| Pmv11    | ctggttgggaggacttactatgggcggcatagtgcaggagtaggaaccgggactacagccctagtggccaccaaacaatt    |
| Pmv12    | ctggttgggaggacttactatgggcggcatagtgcaggagtaggaaccgggactacagccctagtggccaccaaacaatt    |
| Pmv13    | ctggttgggaggacttactatgggcggcatagtgcaggagtaggaaccgggactacagccctagtggccaccaaacaatt    |
| Pmv14    | ctggttgggaggacttactatgggcggcatagtgcaggagtaggaaccgggactacagccctagtggccaccaaacaatt    |
| Pmv15    | ctggttgggaggacttactatgggcggcatagtgcaggagtaggaaccgggactacagccctagtggccaccaaacaatt    |
| Pmv16    | ctggttgggaggacttactatgggcggcatagtgcaggagtaggaaccgggactacagccctagtggccaccaaacaatt    |
| Pmv17    | ctggttgggaggacttactatgggcggcatagtgcaggagtaggaaccgggactacagccctagtggccaccaaacaatt    |
| Pmv18    | ctggttgggaggacttactatgggcggcatagtgcaggagtaggaaccgggactacagccctagtggccaccaaacaatt    |
| Pmv19    | ctggttgggaggacttactatgggcggcatagtgcaggagtaggaaccgggactacagccctagtggccaccaaacaatt    |
| Pmv2     | ctggttgggaggacttactatgggcggcatagtgcaggagtaggaaccgggactacagccctagtggccaccaaacaatt    |
| Pmv20    | ctggttgggaggacttactatgggcggcatagtgcaggagtaggaaccgggactacagccctagtggccaccaaacaatt    |
| Pmv21    | ctggttgggaggacttactatgggcggcatagtgcaggagtaggaaccgggactacagccctagtggccaccaaacaatt    |
| Pmv22    | ctggttgggaggacttactatgggcggcatagtgcaggagtaggaaccgggactacagccctagtggccaccaaacaatt    |
| Pmv23    | ctggttgggaggacttactatgggcggcatagtgcaggagtaggaaccgggactacagccctagtggccaccaaacaatt    |
| Pmv24    | ctggttgggaggacttactatgggcggcatagtgcaggagtaggaaccgggactacagccctagtggccaccaaacaatt    |
| Pmv4     | ctggttAAgAgaAgaacttactatgggcggcatagtgcaggagtaggaaccgggactacagccctagtggccaccaaacaatt |
| Pmv5     | ctggttgggaggacttactatgggcggcatagtgcaggagtaggaaccgggactacagccctagtggccaccaaacaatt    |
| Pmv6     | ctggttgggaggacttactatgggcggcatagtgcaggagtaggaaccgggactacagccctagtggccaccaaacaatt    |
| Pmv7     | ctggttgggaggacttactatgggcggcatagtgcaggagtaggaaccgggactacagccctagtggccaccaaacaatt    |
| Pmv8     | ctggttgggaggacttactatgggcggcatagtgcaggagtaggaaccgggactacagccctagtggccaccaaacaatt    |
| Pmv9     | ctggttgggaggacttactatgggcggcatagtgcaggagtagAaaccgggactacagccctagtggccaccaaacaatt    |

|          |                                                                                   |
|----------|-----------------------------------------------------------------------------------|
| PMV_CONS | CGAGCAGCTCCAGGCAGCCATACATACAGACCTTGGGGCTTTAGAAAAGTCAGTCAGTGCCTTAGAAAAGTCTCTGACCT  |
| Pmv1     | cgagcagctccaggcagccatacacagaccttggggcctttagaaaagtcagtcagtcgccttagaaaagtcctctgacct |
| Pmv10    | cgagcagctccaggcagccatacacagaccttggggcctttagaaaagtcagtcagtcgccttagaaaagtcctctgacct |
| Pmv11    | cgagcagctccaggcagccatacacagaccttggggcctttagaaaagtcagtcagtcgccttagaaaagtcctctgacct |
| Pmv12    | cgagcagctccaggcagccatacacagaccttggggcctttagaaaagtcagtcagtcgccttagaaaagtcctctgacct |
| Pmv13    | cgagcagctccaggcagccatacacagaccttggggcctttagaaaagtcagtcagtcgccttagaaaagtcctctgacct |
| Pmv14    | cgagcagctccaggcagccatacacagaccttggggcctttAaaaagtcagtcagtcgccttagaaaagtcctctgacct  |
| Pmv15    | cgagcagctccaggcagccatacacagaccttggggcctttAaaaagtcagtcagtcgcctAaaaagtcctctgacct    |
| Pmv16    | cgagcagctccaggcagccatacacagaccttggggcctttagaaaagtcagtcagtcgccttagaaaagtcctctgacct |
| Pmv17    | cgagcagctccaggcagccatacacagaccttggggcctttagaaaagtcagtcagtcgccttagaaaagtcctctgacct |
| Pmv18    | cgagcagctccaggcagccatacacagaccttggggcctttAaaaagtcagtcagtcgccttagaaaagtcctctgacct  |
| Pmv19    | cgagcagctccaggcagccatacacagaccttggggcctttagaaaagtcagtcagtcgccttagaaaagtcctctgacct |
| Pmv2     | cgagcagctccaggcagccatacacagaccttggggcctttagaaaagtcagtcagtcgccttagaaaagtcctctgacct |
| Pmv20    | cgagcagctccaggcagccatacacagaccttggggcctttagaaaagtcagtcagtcgccttagaaaagtcctctgacct |
| Pmv21    | cgagcagctccaggcagccatacacagaccttggggcctttAaaaagtcagtcagtcgccttagaaaagtcctctgacct  |
| Pmv22    | cgagcagctccaggcagccatacacagaccttggggcctttagaaaagtcagtcagtcgccttagaaaagtcctctgacct |
| Pmv23    | cgagcagctccaggcagccatacacagaccttggggcctttagaaaagtcagtcagtcgcctAaaaagtcctctgacct   |
| Pmv24    | cgagcagctccaggcagccatacacagaccttggggcctttagaaaagtcagtcagtcgccttagaaaagtcctctgacct |
| Pmv5     | cgagcagctccaggcagccatacacagaccttggggcctttAaaaagtcagtcagtcgcctAaaaagtcctctgacct    |
| Pmv6     | cgagcagctccaggcagccatacacagaccttggggcctttagaaaagtcagtcagtcgccttagaaaagtcctctgacct |
| Pmv7     | cgagcagctccaggcagccatacacagaccttggggcctttAaaaagtcagtcagtcgcctAaaaagtcctctgacct    |
| Pmv8     | cgagcagctccaggcagccatacacagaccttggggcctttagaaaagtcagtcagtcgccttagaaaagtcctctgacct |
| Pmv9     | cgagcagctccaggcagccatacacagaccttggggcctttagaaaagtcagtcagtcgccttagaaaagtcctctgacct |

  

|          |                                                                                   |
|----------|-----------------------------------------------------------------------------------|
| PMV_CONS | CGTTGTCTGAGGTGGTCCTACAGAACC GGAGGGGATTAGATCTACTGTTCTTAAAGAAGGAGGATTATGTGCTGCCCTA  |
| Pmv1     | cgttgtctgaggtggtcctacagaaccggaggggattagatctactgttcctaaaagaaggaggattatgtgctgcccta  |
| Pmv10    | cgttgtctgaggtggtcctacagaaccggaggggattagatctactgttcctaaaagaaggaggattatgtgctgcccta  |
| Pmv11    | cgttgtctgaggtggtcctacagaaccggaggggattagatctactgttcctaaaagaaggaggattatgtgctgcccta  |
| Pmv12    | cgttgtctgaggtggtcctacagaaccggaggggattagatctactgttcctaaaagaaggaggattatgtgctgcccta  |
| Pmv13    | cgttgtctgaggtggtcctacagaaccggaggggattagatctactgttcctaaaagaaggaggattatgtgctgcccta  |
| Pmv14    | cgttgtctgaggtggtcctacagaaccggaggggattagatctactgttcctaaaagaaggaggTttatgtgctgcccta  |
| Pmv15    | cgttgtctgaggtggtcctacagaaccggaggggattagatctactgttcctaaaagaaggaggattatgtgctgcccta  |
| Pmv16    | cgttgtctgaggtggtcctacagaaccggaggggattagatctactgttcctaaaagaaggaggattatgtgctgcccta  |
| Pmv17    | cgttgtctgaggtggtcctacagaaccggaggggattagatctactgttcctaaaagaaggaggattatgtgctgcccta  |
| Pmv18    | cgttgtctgaggtggtcctacagaaccggaggggattagatctactgttcctaaaagaaggaggattatgtgctgcccta  |
| Pmv19    | cgttgtctgaggtggtcctacagaaccggaggggattagatctactgttcctaaaagaaggaggattatgtgctgcccta  |
| Pmv2     | cgttgtctgaggtggtcctacagaaccggaggggattagatctactgttcctaaaagaaggaggattatgtgctgcccta  |
| Pmv20    | cgttgtctgaggtggtcctacagaaccggaggAagattagatctactgttcctaaaagaaggAagattatgtgctgcccta |
| Pmv21    | cgttgtctgaggtggtcctacagaaccggaggggattagatctactgttcctaaaagaaggaggattatgtgctgcccta  |
| Pmv22    | cgttgtctgaggtggtcctacagaaccggaggggattagatctactgttcctaaaagaaggaggattatgtgctgcccta  |
| Pmv23    | cgttgtctgaggtggtcctacagaaccggaggAagattagatctactgttcctaaaAaaggaggattatgtgctgcccta  |
| Pmv24    | cgttgtctgaggtggtcctacagaaccggaggggattagatctactgttcctaaaagaaggaggattatgtgctgcccta  |
| Pmv4     | cgttgtctgaggtggtcctacagaaccggaggggattagatctactgttcctaaaAaaggAagattatgtgctgcccta   |
| Pmv5     | cgttgtctgaggtggtcctacagaaccggaggggattagatctactgttcctaaaagaaggaggattatgtgctgcccta  |
| Pmv6     | cgttgtctgaggtggtcctacagaaccggaggggattagatctactgttcctaaaagaaggaggattatgtgctgcccta  |
| Pmv7     | cgttgtctgaggtggtcctacagaaccggaggggattagatctactgttcctaaaagaaggaggattatgtgctgcccta  |
| Pmv8     | cgttgtctgaggtggtcctacagaaccggaggggattagatctactgttcctaaaagaaggaggattatgtgctgcccta  |
| Pmv9     | cgttgtctgaggtggtcctacagaaccggaggggattagatctactgttcctaaaagaaggaggattatgtgctgcccta  |

|          |                                                                                     |
|----------|-------------------------------------------------------------------------------------|
| PMV_CONS | AAAGAAGAATGCTGTTTCTACGCGGACCACACTGGCGTAGTAAGAGATAGCATGGCAAAGCTAAGAGAAAGGTTGAACCA    |
| Pmv1     | aaagaagaatgctggtttctacgcggaaccacactggcgtagtaagagatagcatggcaaagctaagagaaaaggttgaacca |
| Pmv10    | aaaAaagaatgctggtttctacgcggaaccacactggcgtagtaagagatagcatggcaaagctaagagaaaaggttgaacca |
| Pmv11    | aaagaagaatgctggtttctacgcggaaccacactggcgtagtaagagatagcatggcaaagctaagagaaaaggttgaacca |
| Pmv12    | aaagaagaatgctggtttctacgcggaaccacactggcgtagtaagagatagcatggcaaagctaagagaaaaggttgaacca |
| Pmv13    | aaagaagaatgctggtttctacgcggaaccacactggcgtagtaagagatagcatggcaaagctaagagaaaaggttgaacca |
| Pmv14    | aaagaagaatgctggtttctacgAagccacactggcgtagtaagagataAcatggcaaagctaagagaaaaggttgaacca   |
| Pmv15    | aaagaagaatgctggtttctacgcggaaccacactggcgtagtaagagatagcatggcaaagctaagagaaaaggttgaacca |
| Pmv16    | aaagaagaatgctggtttctacgcggaaccacactggcgtagtaagagatagcatggcaaagctaagagaaaaggttgaacca |
| Pmv17    | aaagaagaatgctggtttctacgcggaaccacactggcgtagtaagagatagcatggcaaagctaagagaaaaggttgaacca |
| Pmv18    | aaagaagaatgctggtttctacgcggaaccacactggcgtagtaagagatagcatggcaaagctaagagaaaaggttgaacca |
| Pmv19    | aaagaagaatgctggtttctacgcggaaccacactggcgtagtaagagatagcatggcaaagctaagagaaaaggttgaacca |
| Pmv2     | aaagaagaatgctggtttctacgcggaaccacactggcgtagtaagagatagcatggcaaagctaagagaaaaggttgaacca |
| Pmv20    | aaaAaagaatgctggtttctacgcggaaccacactggcgtagtaagagatagcatggcaaagctaagagaaaaggttgaacca |
| Pmv21    | aaagaagaatgctggtttctacgcggaaccacactggcgtagtaagagatagcatggcaaagctaagaAaaaggttgaacca  |
| Pmv22    | aaagaagaatgctggtttctacgcggaaccacactggcgtagtaagagatagcatggcaaagctaagagaaaaggttgaacca |
| Pmv23    | aaagaagaatgctggtttctacgcggaaccacactggcgtagtaagagatagcatggcaaagctaaAAaaaggttgaacca   |
| Pmv24    | aaagaagaatgctggtttctacgcggaaccacactggcgtagtaagagatagcatggcaaagctaagagaaaaggttgaacca |
| Pmv4     | aaaAAaatgctggtttctacgcggaaccacactggcgtagtaagagatagcatggcaaagctaaAAaaaggttAaacca     |
| Pmv5     | aaagaagaatgctggtttctacgcggaaccacactggcgtagtaagagatagcatggcaaagctaagagaaaaggttgaacca |
| Pmv6     | aaagaagaatgctggtttctacgcggaaccacactggcgtagtaagagatagcatggcaaagctaagagaaaaggttgaacca |
| Pmv7     | aaagaagaatgctggtttctacgcggaaccacactggcgtagtaagagatagcatggcaaagctaagagaaaaggttgaacca |
| Pmv8     | aaagaagaatgctggtttctacgcggaaccacactggcgtagtaagagatagcatggcaaagctaagagaaaaggttgaacca |
| Pmv9     | aaagaaAaatgctggtttctacgcggaaccacactggcgtagtaagagatagcatggcaaagctaagagaaaaggttAaacca |

  

|          |                                                                                   |
|----------|-----------------------------------------------------------------------------------|
| PMV_CONS | GAGACAAAAATTGTTGGAATCAGGACAAGGGTGGTTTGAGGGACTGTTTAACAGGTCCCCATGGTTTACGACCTTAATAT  |
| Pmv1     | gagacaaaaattggttcgaatcaggacaagggtggtttgagggactgtttaacaggtccccatggttcacgaccttaatat |
| Pmv10    | gagacaaaaattggttcgaatcaggacaagggtggtttgagggactgtttaacaggtccccatggttcacgaccttaatat |
| Pmv11    | gagacaaaaattggttcgaatcaggacaagggtggtttgagggactgtttaacaggtccccatggttcacgaccttaatat |
| Pmv12    | gagacaaaaattggttcgaatcaggacaagggtggtttgagggactgtttaacaggtccccatggttcacgaccttaatat |
| Pmv13    | gagacaaaaattggttcgaatcaggacaagggtggtttgagggactgtttaacaggtccccatggttcacgaccttaatat |
| Pmv14    | gagacaaaaattggttcgaatcaggacaagggtggtttgagggactgtttaacaggtccccatggttcacgaccttaatat |
| Pmv15    | gagacaaaaattggttcAaatcaggacaagggtggtttgagggactgtttaacaggtccccatggttcacgaccttaatat |
| Pmv16    | gagacaaaaattggttcgaatcaggacaagggtggtttgagggactgtttaacaggtccccatggttcacgaccttaatat |
| Pmv17    | gagacaaaaattggttcgaatcaggacaagggtggtttgagggactgtttaacaggtccccatggttcacgaccttaatat |
| Pmv18    | gagacaaaaattggttcAaatcaggacaagggtggtttgagggactgtttaacaggtccccatggttcacgaccttaatat |
| Pmv19    | gagacaaaaattggttcgaatcaggacaagggtggtttgagggactgtttaacaggtccccatggttcacgaccttaatat |
| Pmv2     | gagacaaaaattggttcgaatcaggacaagggtggtttgagggactgtttaacaggtccccatggttcacgaccttaatat |
| Pmv20    | gagacaaaaattggttcgaatcaggacaagggtggtttgagggactgtttaacaggtccccatggttcacgaccttaatat |
| Pmv21    | gagacaaaaattggttcgaatcaggacaagggtggtttgaAggactgtttaacaggtccccatggttcacgaccttaatat |
| Pmv22    | gagacaaaaattggttcAaatcaggacaagggtggtttgagggactgtttaacaggtccccatggttcacgaccttaatat |
| Pmv23    | gagacaaaaattggttcgaatcaggacaagggtggtttgagggactgtttaacaggtccccatggttcacgaccttaatat |
| Pmv24    | gagacaaaaattggttcgaatcaggacaagggtggtttgagggactgtttaacaggtccccatggttcacgaccttaatat |
| Pmv4     | gagacaaaaattggttcgaatcaggacaagggtggtttAgggactgtttaacaggtccccatggttcacgaccttaatat  |
| Pmv5     | gagacaaaaattggttcgaatcaggacaagggtggtttgagggactgtttaacaggtccccatggttcacgaccttaatat |
| Pmv6     | gagacaaaaattggttcgaatcaggacaagggtggtttgagggactgtttaacaggtccccatggttcacgaccttaatat |
| Pmv7     | gagacaaaaattggttcgaatcaggacaagggtggtttgagggactgtttaacaggtccccatggttcacgaccttaatat |
| Pmv8     | gagacaaaaattggttcgaatcaggacaagggtggtttgagggactgtttaacaggtccccatggttcacgaccttaatat |
| Pmv9     | gagacaaaaattggttcgaatcaggacaagggtggtttgagggactgtttaacaggtccccatggttcacgaccttaatat |

|          |                                                                                   |
|----------|-----------------------------------------------------------------------------------|
| PMV_CONS | CCACCATTATGGGCCCTTGATAACTTTTATTAATCCTACTCTTCGGACCCCTGTATTCTCAACCGCTTGGTCCAGTTT    |
| Pmv1     | cTaccattatgggccccttgataataacttttattaatcctactcttcggaccctgtattctcaaccgcttgggccagttt |
| Pmv10    | ccaccattatgggccccttgataataacttttattaatcctactcttcggaccctgtattctcaaccgcttgggccagttt |
| Pmv11    | cTaccattatgggccccttgataataacttttattaatcctactcttcggaccctgtattctcaaccgcttgggccagttt |
| Pmv12    | ccaccattatgggccccttAataataacttttattaatcctactcttcggaccctgtattctcaaccgcttgggccagttt |
| Pmv13    | ccaccattatgggccccttgataataacttttattaatcctactcttcggaccctgtattctcaaccgcttgggccagttt |
| Pmv14    | ccaccattatgggccccttAataataacttttattaatcctactcttcggaccctgtattctcaaccgcttgggccagttt |
| Pmv15    | ccaccattatgggccccttgataataacttttattaatcctactcttcggaccctgtattctcaaccgcttgggccagttt |
| Pmv16    | ccaccattatgggccccttgataataacttttattaatcctactcttcggaccctgtattctcaaccgcttgggccagttt |
| Pmv17    | ccaccattatgggccccttAataataacttttattaatcctactcttcggaccctgtattctcaaccgcttgggccagttt |
| Pmv18    | ccaccattatgggccccttAataataacttttattaatcctactcttcggaccctgtattctcaaccgcttgggccagttt |
| Pmv19    | ccaccattatgggccccttgataataacttttattaatcctactcttcggaccctgtattctcaaccgcttgggccagttt |
| Pmv2     | ccaccattatgggccccttgataataacttttattaatcctactcttcggaccctgtattctcaaccgcttgggccagttt |
| Pmv20    | ccaccattatgggccccttgataataacttttattaatcctactcttcggaccctgtattctcaaccgcttgggccagttt |
| Pmv21    | ccaccattatgggccccttgataataacttttattaatcctactcttcggaccctgtattctcaaccgcttgggccagttt |
| Pmv22    | ccaccattatgggccccttgataataacttttattaatcctactcttcggaccctgtattctcaaccgcttgggccagttt |
| Pmv23    | ccaccattatgggccccttgataataacttttattaatcctactcttcggaccctgtattctcaaccgcttgggccagttt |
| Pmv24    | ccaccattatgggccccttgataataacttttattaatcctactcttcggaccctgtattctcaaccgcttgggccagttt |
| Pmv4     | ccaccattatgggccccttgataataacttttattaatcctactcttcggaccctgtattctcaaccgcttgggccagttt |
| Pmv5     | cTaccattatgggccccttgataataacttttattaatcctactcttcggaccctgtattctcaaccgcttgggccagttt |
| Pmv6     | ccaccattatgggccccttgataataacttttattaatcctactcttcggaccctgtattctcaaccgcttgggccagttt |
| Pmv7     | ccaccattatgggccccttgataataacttttattaatcctactcttcggaccctgtattctcaaccgcttgggccagttt |
| Pmv8     | ccaccattatgggccccttgataataacttttattaaAcctactcttcggaccctgtattctcaaccgcttgggccagttt |
| Pmv9     | ccaccattatgggccccttgataataacttttattaatcctactcttcggaccctgtattctcaaccgcttgggccagttt |

  

|          |                          |
|----------|--------------------------|
| PMV_CONS | GTAAGACAGAATTCGGTAGTG    |
| Pmv1     | gtaaaagacagaatttcggtagt  |
| Pmv10    | gtaaaagacagaatttcggtagt  |
| Pmv11    | gtaaaagacagaatttcggtagt  |
| Pmv12    | gtaaaagacagaatttcggtagt  |
| Pmv13    | gtaaaagacagaatttcggtagt  |
| Pmv14    | gtaaaagacagaatttcggtagt  |
| Pmv15    | gtaaaagacagaatttcggtagt  |
| Pmv16    | gtaaaagacagaatttcggtagt  |
| Pmv17    | gtaaaagacagaatttcggtagt  |
| Pmv18    | gtaaaagacagaatttcggtagt  |
| Pmv19    | gtaaaagacagaatttcggtagt  |
| Pmv2     | gtaaaagacagaatttcggtagt  |
| Pmv20    | gtaaaagacagaatttcggtagt  |
| Pmv21    | gtaaaagacagaatttcggtagt  |
| Pmv22    | gtaaaagacagaatttcggtagt  |
| Pmv23    | gtaaaagacagaatttcggtagt  |
| Pmv24    | gtaaaagacagaatttcggtagt  |
| Pmv4     | gtaaaagacagAaatttcggtagt |
| Pmv5     | gtaaaagacagaatttcggtagt  |
| Pmv6     | gtaaaagacagaatttcggtagt  |
| Pmv7     | gtaaaagacagaatttcggtagt  |
| Pmv8     | gtaaaagacagaatttcggtagt  |
| Pmv9     | gtaaaagacagaatttcggtagt  |

## Mpmv (concatenated *gag*, *pol* and *env*)

|           |                                                                                       |
|-----------|---------------------------------------------------------------------------------------|
| MPMV_CONS | ATGGGACAGACCGTAACCTACCCCTCTGAGTCTAACCTTGCGAGCACTGGGGAGATGTCCAGCGCATTGCATCCAACCAAGTC   |
| Mpmv1     | atgggacagaccgtaactacccctctgagctctaacccttgcagcactggggagatgtccagcgcatcgcacccaaccagtc    |
| Mpmv10    | atgggacagaccgtaactacccctctgagctctaacccttgcagcactggggagatgtccagcgcatcgcacccaaccagtc    |
| Mpmv11    | atgggacagaccgtaactacccctctgagctctaacccttgcagcactggggagatgtccagcgcatcgcacccaaccagtc    |
| Mpmv12    | atgggacagaccgtaactacccctctgagctctaacccttgcagcactggggagatgtccagcgcatcgcacccaaccagtc    |
| Mpmv13    | atgggacagaccgtaactacccctctgagctctaacccttgcagcactggggagatgtccagcgcatcgcacccaaccagtc    |
| Mpmv2     | atgggacagaccgtaactacccctctgagctctaacccttgcagcactggggagatgtccagcgcatcgcacccaaccagtc    |
| Mpmv3     | atgggacagaccgtaactacccctctgagctctaacccttgcagcactggggagatgtccagcgcatcgcacccaaccagtc    |
| Mpmv4     | atgggacagaccgtaactacccctctgagctctaacccttgcagcactggggagatgtccagcgcatcgcacccaaccagtc    |
| Mpmv5     | atgggacagaccgtaactacccctctgagctctaacccttgcagcactggggagatgtccagcgcatcgcacccaaccagtc    |
| Mpmv6     | atgggacagaccgtaactacccctctgagctctaacccttgcagcactggggagatgtccagcgcatcgcacccaaccagtc    |
| Mpmv7     | atgggacagaccgtaactacccctctgagctctaacccttgcagcactggggagatgtccagcgcatcgcacccaaccagtc    |
| Mpmv8     | atgggacagaccgtaactacccctctgagctctaacccttgcagcactggggagatgtccagcgcatcgcacccaaccagtc    |
| Mpmv9     | atgggacagaccgtaactacccctctgagctctaacccttgcagcactggggagatgtccagcgcatcgcacccaaccagtc    |
| MPMV_CONS | TGTGGATGTCTAGGAAGAGGCGCTGGATTACCTTCTGTTCGCCGAATGGCCAACCTTCAATGTAGGATGGCTCAGGATG       |
| Mpmv1     | tgtggatgtcaggaagaggcgctggattaccttctgttccgccgaatggccaactttcaatgtaggatggcctcaggatg      |
| Mpmv10    | tgtggatgtcaggaagaggcgctggattaccttctgttccgccgaatggccaactttcaatgtaggatggcctcaggatg      |
| Mpmv11    | tgtggatgtcaggaagaggcgctggattaccttctgttccgccgaatggccaactttcaatgtaggatggcctcaggatg      |
| Mpmv12    | tgtggatgtcaggaagaggcgctggattaccttctgttccgccgaatggccaactttcaatgtaggatggcctcaggatg      |
| Mpmv13    | tgtggatgtcaggaagaggcgctggattaccttctgttccgccgaatggccaactttcaatgtaggatggcctcaggatg      |
| Mpmv2     | tgtggatgtcaggaagaggcgctggattaccttctgttccgccgaatggccaactttcaatgtaggatggcctcaggatg      |
| Mpmv3     | tgtggatgtcaggaagaggcgctggattaccttctgttccgccgaatggccaactttcaatgtaggatggcctcaggatg      |
| Mpmv4     | tgtggatgtcaggaagaggcgctggattaccttctgttccgccgaatggccaactttcaatgtaggatggcctcaggatg      |
| Mpmv5     | tgtggatgtcaggaagaggcgctggattaccttctgttccgccgaatggccaactttcaatgtaggatggcctcaggatg      |
| Mpmv6     | tgtggatgtcaggaagaggcgctggattaccttctgttccgccgaatggccaactttcaatgtaggatggcctcaggatg      |
| Mpmv7     | tgtggatgtcaggaagaggcgctggattaccttctgttccgccgaatggccaactttcaatgtaggatggcctcaggatg      |
| Mpmv8     | tgtggatgtcaggaagaggcgctggattaccttctgttccgccgaatggccaactttcaatgtaggatggcctcaggatg      |
| Mpmv9     | tgtggatgtcaggaagaggcgctggattaccttctgttccgccgaatggccaactttcaatgtaggatggcctcaggatg      |
| MPMV_CONS | GTACTTTCAATTTAAGTATTATCTCTCAGGTTAAGCTAGAGTGTGTTTGTCTGGTCCCCACGGACACCCGGATCAGGTC       |
| Mpmv1     | gtactttcaatttaagtattatctctcagggttaagctagagtgtttgtcctgggtccccacggacacccggatcagggtc     |
| Mpmv10    | gtactttcaatttaagtattatctctcagggttaagctagagtgtttgtcctgggtccccacggacacccggatcagggtc     |
| Mpmv11    | gtactttcaatttaagtattatctctcagggttaagctagagtgtttgtcctgggtccccacggacacccggatcagggtc     |
| Mpmv12    | gtactttcaatttaagtattatctctcagggttaagctagagtgtttgtcctgggtccccacggacacccggatcagggtc     |
| Mpmv13    | gtactttcaatttaagtattatctctcagggttaagctagagtgtttgtcctgggtccccacggacacccggatcagggtc     |
| Mpmv2     | gtactttcaatttaagtattatctctcagggttaagctagagtgtttgtcctgggtccccacggacacccggatcagggtc     |
| Mpmv3     | gtactttcaatttaagtattatctctcagggttaagctagagtgtttgtcctgggtccccacggacacccggatcagggtc     |
| Mpmv4     | gtactttcaatttaagtattatctctcagggttaagctagagtgtttgtcctgggtccccacggacacccggatcagggtc     |
| Mpmv5     | gtactttcaatttaagtattatctctcagggttaagctagagtgtttgtcctgggtccccacggacacccggatcagggtc     |
| Mpmv6     | gtactttcaatttaagtattatctctcagggttaagctagagtgtttgtcctgggtccccacggacacccggatcagggtc     |
| Mpmv7     | gtactttcaatttaagtattatctctcagggttaagctagagtgtttgtcctgggtccccacggacacccggatcagggtc     |
| Mpmv8     | gtactttcaatttaagtattatctctcagggttaagctagagtgtttgtcctgggtccccacggacacccggatcagggtc     |
| Mpmv9     | gtactttcaatttaagtattatctctcagggttaagctagagtgtttgtcctgggtccccacggacacccggatcagggtc     |
| MPMV_CONS | CCATATATCGTTACCTGGGAGGCACCTTGCCTATGACCCCCCTCCGTGGGTCAAACCGTTTGTCTCTCTAAACCTCTCTCC     |
| Mpmv1     | ccatatatcggttacctgggagggcacttgccctatgacccccctccgtgggtcaaaccggtttgtttctcctaaccctcctcc  |
| Mpmv10    | ccatatatcggttacctgggagggcacttgccctatgacccccctccgtgggtcaaaccggtttgtttctcctaaccctcctcc  |
| Mpmv11    | ccatatatcggttacctgggagggcacttgccctatgacccccctccgtgggtcaaaccggtttgtttctcctaaccctcctcc  |
| Mpmv12    | ccatatatcggttacctgggagggcacttgccctatgacccccctccgtgggtcaaaccggtttgtttctcctaaccctcctcc  |
| Mpmv13    | ccatatatcggttacctgggagggcacttgccctatgacccccctccgtgggtcaaaccggtttgtttctcctaaccctcctcc  |
| Mpmv2     | ccatatatcggttacctgggagggcacttgccctatgacccccctccgtgggtcaaaccggtttgtttctcctaaccctcctcc  |
| Mpmv3     | ccatatatcggttacctgggagggcacttgccctatgacccccctccgtgggtcaaaccggtttgtttctcctaaccctcctcc  |
| Mpmv4     | ccatatatcggttacctgggagggcacttgccctatgacccccctccgtgggtcaaaccggtttgtttctcctaaccctcctcc  |
| Mpmv5     | ccatatatcggttacctgggagggcacttgccctatgacccccctccgtgggtcaaaccggtttgtttctcctaaccctcctcc  |
| Mpmv6     | ccatatatcggttacctgaggagggcacttgccctatgacccccctccgtgggtcaaaccggtttgtttctcctaaccctcctcc |
| Mpmv7     | ccatatatcggttacctgggagggcacttgccctatgacccccctccgtgggtcaaaccggtttgtttctcctaaccctcctcc  |
| Mpmv8     | ccatatatcggttacctgggagggcacttgccctatgacccccctccgtgggtcaaaccggtttgtttctcctaaccctcctcc  |
| Mpmv9     | ccatatatcggttacctgggagggcacttgccctatgacccccctccgtgggtcaaaccggtttgtttctcctaaccctcctcc  |

|           |                                                                                     |
|-----------|-------------------------------------------------------------------------------------|
| MPMV_CONS | CTTGCCGACAGCTCCCGTCCCTCCGCCCCGGTCTTCTGCGCAACCTCCGTCCCGATCTGCCCTTTACCCTGCCCTTACCC    |
| Mpmv1     | cttgccgacagctcccgctcctcccgcccgggtccttctgcgcaacctccgtcccgatctgccctttaccctgcccttacc   |
| Mpmv10    | cttgccgacagctcccgctcctcccgcccgggtccttctgcgcaacctccgtcccgatctgccctttaccctgcccttacc   |
| Mpmv11    | cttgccgacagctcccgctcctcccgcccgggtccttctgcgcaacctccgtcccgatctgccctttaccctgcccttacc   |
| Mpmv12    | cttgccgacagctcccgctcctcccgcccgggtccttctgcgcaacctccgtcccgatctgccctttaccctgcccttacc   |
| Mpmv13    | cttgccgacagctcccgctcctcccgcccgggtccttctgcgcaacctccgtcccgatctgccctttaccctgcccttacc   |
| Mpmv2     | cttgccgacagctcccgctcctcccgcccgggtccttctgcgcaacctccgtcccgatctgccctttaccctgcccttacc   |
| Mpmv3     | cttgccgacagctcccgctcctcccgcccgggtccttctgcgcaacctccgtcccgatctgccctttaccctgcccttacc   |
| Mpmv4     | cttgccgacagctcccgctcctcccgcccgggtccttctgcgcaacctccgtcccgatctgccctttaccctgcccttacc   |
| Mpmv5     | cttgccgacagctcccgctcctcccgcccgggtccttctgcgcaacctccgtcccgatctgccctttaccctgcccttacc   |
| Mpmv6     | cttgccgacagctcccgctcctcccgcccgggtccttctgcgcaacctccgtcccgatctgccctttaccctgcccttacc   |
| Mpmv7     | cttgccgacagctcccgctcctcccgcccgggtccttctgcgcaacctccgtcccgatctgccctttaccctgcccttacc   |
| Mpmv8     | cttgccgacagctcccgctcctcccgcccgggtccttctgcgcaacctccgtcccgatctgccctttaccctgcccttacc   |
| Mpmv9     | cttgccgacagctcccgctcctcccgcccgggtccttctgcgcaacctccgtcccgatctgccctttaccctgcccttacc   |
|           |                                                                                     |
| MPMV_CONS | CCTCTATAAAGTCCAAACCTCCTAAGCCCCAGGTTCTCCCTGATAGCGGCGGACCTCTCATTGACCTTCTCACAGAGGAC    |
| Mpmv1     | cctctataaagtccaaacctcctaagccccagggttctccctgatagcgggcggaacctctcattgaccttctcacagaggac |
| Mpmv10    | cctctataaagtccaaacctcctaagccccagggttctccctgatagcgggcggaacctctcattgaccttctcacagaggac |
| Mpmv11    | cctctataaagtccaaacctcctaagccccagggttctccctgatagcgggcggaacctctcattgaccttctcacagaggac |
| Mpmv12    | cctctataaagtccaaacctcctaagccccagggttctccctgatagcgggcggaacctctcattgaccttctcacagaggac |
| Mpmv13    | cctctataaagtccaaacctcctaagccccagggttctccctgatagcgggcggaacctctcattgaccttctcacagaggac |
| Mpmv2     | cctctataaagtccaaacctcctaagccccagggttctccctgatagcgggcggaacctctcattgaccttctcacagaggac |
| Mpmv3     | cctctataaagtccaaacctcctaagccccagggttctccctgatagcgggcggaacctctcattgaccttctcacagaggac |
| Mpmv4     | cctctataaagtccaaacctcctaagccccagggttctccctgatagcgggcggaacctctcattgaccttctcacagaggac |
| Mpmv5     | cctctataaagtccaaacctcctaagccccagggttctccctgatagcgggcggaacctctcattgaccttctcacagaggac |
| Mpmv6     | cctctataaagtccaaacctcctaagccccagggttctccctgatagcgggcggaacctctcattgaccttctcacagaggac |
| Mpmv7     | cctctataaagtccaaacctcctaagccccagggttctccctgatagcgggcggaacctctcattgaccttctcacagaggac |
| Mpmv8     | cctctataaagtccaaacctcctaagccccagggttctccctgatagcgggcggaacctctcattgaccttctcacagaggac |
| Mpmv9     | cctctataaagtccaaacctcctaagccccagggttctccctgatagcgggcggaacctctcattgaccttctcacagaggac |
|           |                                                                                     |
| MPMV_CONS | CCCCCGCGGTACGGAGCACAACTTCTCTCTCTGCCAGAGAGAACGATGAAGAAGAGGGCGGCCACCACCTCCGAGGTTTC    |
| Mpmv1     | cccccgccgtacggagcacaaccttctcctctgcccagagagaacgatgaagaagaggcgccaccacctccgaggtttc     |
| Mpmv10    | cccccgccgtacggagcacaaccttctcctctgcccagagagaacgatgaagaagaggcgccaccacctccgaggtttc     |
| Mpmv11    | cccccgccgtacggagcacaaccttctcctctgcccagagagaacgatgaagaagaggcgccaccacctccgaggtttc     |
| Mpmv12    | cccccgccgtacggagcacaaccttctcctctgcccagagagaacgatgaagaagaggcgccaccacctccgaggtttc     |
| Mpmv13    | cccccgccgtacggagcacaaccttctcctctgcccagagagaacgatgaagaagaggcgccaccacctccgaggtttc     |
| Mpmv2     | cccccgccgtacggagcacaaccttctcctctgcccagagagaacgatgaagaagaggcgccaccacctccgaggtttc     |
| Mpmv3     | cccccgccgtacggagcacaaccttctcctctgcccagagagaacgatgaagaagaggcgccaccacctccgaggtttc     |
| Mpmv4     | cccccgccgtacggagcacaaccttctcctctgcccagagagaacgatgaagaagaggcgccaccacctccgaggtttc     |
| Mpmv5     | cccccgAag-----gcacaaccttctcctctgcccagagagaacAatgaAaagaggcgccaccacctccgaggtttc       |
| Mpmv6     | cccccgccgtacggagcacaaccttctcctctgcccagagagaacgatgaagaagaggcAgccaccacctccgaggtttc    |
| Mpmv7     | cccccgccgtacggagcacaaccttctcctctgcccagagagaacgatgaagaagaggcgccaccacctccgaggtttc     |
| Mpmv8     | cccccgccgtacggagcacaaccttctcctctgcccagagagaacgatgaagaagaggcgccaccacctccgaggtttc     |
| Mpmv9     | cccccgccgtacggagcacaaccttctcctctgcccagagagaacgatgaagaagaggcgccaccacctccgaggtttc     |
|           |                                                                                     |
| MPMV_CONS | CCCCCTTCTCCCATGGCGTCTCGACTGCGGGGAAGGAGAGACCCTCCCGCAGCGGACTCCACCTCTCCAGGCATTCC       |
| Mpmv1     | cccccttctcccatggcgtctcgactgcggggaaggagagaccctcccgacgaggactccacctctccaggcatcc        |
| Mpmv10    | cccccttctcccatggcgtctcgactgcggggaaggagagaccctcccgacgaggactccacctctccaggcatcc        |
| Mpmv11    | cccccttctcccatggcgtctcgactgcggggaaggagagaccctcccgacgaggactccacctctccaggcatcc        |
| Mpmv12    | cccccttctcccatggcgtctcgactgcggggaaggagagaccctcccgacgaggactccacctctccaggcatcc        |
| Mpmv13    | cccccttctcccatggcgtctcgactgcggggaaggagagaccctcccgacgaggactccacctctccaggcatcc        |
| Mpmv2     | cccccttctcccatggcgtctcgactgcggggaaggagagaccctcccgacgaggactccacctctccaggcatcc        |
| Mpmv3     | cccccttctcccatggcgtctcgactgcggggaaggagagaccctcccgacgaggactccacctctccaggcatcc        |
| Mpmv4     | cccccttctcccatggcgtctcgactgcggggaaggagagaccctcccgacgaggactccacctctccaggcatcc        |
| Mpmv5     | cccccttctcccatggcgtctcgactgcggggaaggagagaccctcccgacgaggactccacctctccaggcatcc        |
| Mpmv6     | cccccttctcccatggcgtctcgactgcgggAaaggagagaccctcccgacgaggactccacctctccaggcatcc        |
| Mpmv7     | cccccttctcccatggcgtctcgactgcggggaaggagagaccctcccgacgaggactccacctctccaggcatcc        |
| Mpmv8     | cccccttctcccatggcgtctcgactgcggggaaggagagaccctcccgacgaggactccacctctccaggcatcc        |
| Mpmv9     | cccccttctcccatggcgtctcgactgcggggaaggagagaccctcccgacgaggactccacctctccaggcatcc        |

|           |                                                                                    |
|-----------|------------------------------------------------------------------------------------|
| MPMV_CONS | CACTCCGTATGGGGGAGATGGCCAGCTTCAGTACTGGCCGTTTTCTCCTCTGACTTATATAATTGGAAAAATAATAAC     |
| Mpmv1     | cactccgtatggggggagatggccagcttcagtaactggccggttttctcctctgacttatataaattggaaaaataataac |
| Mpmv10    | cactccgtatggggggagatggccagcttcagtaactggccggttttctcctctgacttatataaattggaaaaataataac |
| Mpmv11    | cactccgtatggggggagatggccagcttcagtaactggccggttttctcctctgacttatataaattgAaaaaataataac |
| Mpmv12    | cactccgtatggggggagatggccagcttcagtaactggccggttttctcctctgacttatataaattggaaaaataataac |
| Mpmv13    | cactccgtatggggggagatggccagcttcagtaactggccggttttctcctctgacttatataaattggaaaaataataac |
| Mpmv2     | cactccgtatggggggagatggccagcttcagtaactggccggttttctcctctgacttatataaattggaaaaataataac |
| Mpmv3     | cactccgtatggggggagatggccagcttcagtaactggccggttttctcctctgacttatataaattggaaaaataataac |
| Mpmv4     | cactccgtatggggggagatggccagcttcagtaactggccggttttctcctctgacttatataaattggaaaaataataac |
| Mpmv5     | cactccgtatggggggagatggccagcttcagtaactggccggttttctcctctgacttatataaattggaaaaataataac |
| Mpmv6     | cactccgtatggggggagatggccagcttcagtaactggccggttttctcctctgacttatataaattggaaaaataataac |
| Mpmv7     | cactccgtatggggggagatggccagcttcagtaactggccggttttctcctctgacttatataaattggaaaaataataac |
| Mpmv8     | cactccgtatggggggagatggccagcttcagtaactggccggttttctcctctgacttatataaattAAaaaaataataac |
| Mpmv9     | cactccgtatggggggagatggccagcttcagtaactggccggttttctcctctgacttatataaattggaaaaataataac |
|           |                                                                                    |
| MPMV_CONS | CCTTCCTTTTCTGAAGATCCAGGTAATTGACGGCCTTGATTGAGTCCGTCCTCATCACCCACCAGCCCACCTGGGACGA    |
| Mpmv1     | ccttccttttctgaagatccaggtaaatgacggccttgattgagtcgcgtcctcatcaccaccagcccacctgggacga    |
| Mpmv10    | ccttccttttctgaagatccaggtaaatgacggccttgattgagtcgcgtcctcatcaccaccagcccacctgggacga    |
| Mpmv11    | ccttccttttctgaagatccaggtaaatgacggccttgattgagtcgcgtcctcatcaccaccagcccacctgggacga    |
| Mpmv12    | ccttccttttctgaagatccaggtaaatgacggccttgattgagtcgcgtcctcatcaccaccagcccacctgggacga    |
| Mpmv13    | ccttccttttctgaagatccaggtaaatgacggccttgattgagtcgcgtcctcatcaccaccagcccacctgggacga    |
| Mpmv2     | ccttccttttctgaagatccaggtaaatgacggccttgattgagtcgcgtcctcatcaccaccagcccacctgggacga    |
| Mpmv3     | cctCcttttctgaagatccaggtaaatgacggccttgattgagtcgcgtcctcatcaccaccagcccacctgggacga     |
| Mpmv4     | ccttccttttctgaagatccaggtaaatgacggccttgattgagtcgcgtcctcatcaccaccagcccacctgggacga    |
| Mpmv5     | ccttccttttctgaagatccaggtaaatgacggccttgattgagtcgcgtcctcatcaccaccagcccacctgggacga    |
| Mpmv6     | ccttccttttctgaagatccaggtaaatgacggccttgattgagtcgcgtcctcatcaccaccagcccacctgggacga    |
| Mpmv7     | ccttccttttctgaagatccaggtaaatgacggccttgattgagtcgcgtcctcatcaccaccagcccacctgggacga    |
| Mpmv8     | ccttccttttctgaagatccaggtaaatgacggccttgattgagtcgcgtcctcatcaccaccagcccacctgggacga    |
| Mpmv9     | ccttccttttctgaagatccaggtaaatgacggccttgattgagtcgcgtcctcatcaccaccagcccacctgggacga    |
|           |                                                                                    |
| MPMV_CONS | CTGTcAGCAGTTGTTGGGGACCTGCTGACCGGAGAGAAAAGCAGCGGGTGCTCCTAGAGGCTAGAAAAGCAGTCCGGG     |
| Mpmv1     | ctgtcagcagttggttggggaccctgctgaccgggagaagaaaagcagcgggtgctcctagaggctagaaaagcagtcggg  |
| Mpmv10    | ctgtcagcagttggttggggaccctgctgaccgggagaagaaaagcagcgggtgctcctagaggctagaaaagcagtcggg  |
| Mpmv11    | ctgtcagcagttggttggggaccctgctgaccgggagaagaaaagcagcgggtgctcctagaggctagaaaagcagtcggg  |
| Mpmv12    | ctgtcagcagttggttggggaccctgctgaccgggagaagaaaagcagcgggtgctcctagaggctagaaaagcagtcggg  |
| Mpmv13    | ctgtcagcagttggttggggaccctgctgaccgggagaagaaaagcagcgggtgctcctagaggctagaaaagcagtcggg  |
| Mpmv2     | ctgtcagcagttggttggggaccctgctgaccgggagaagaaaagcagcgggtgctcctagaggctagaaaagcagtcggg  |
| Mpmv3     | ctgtcagcagttggttggggaccctgctgaccgggagaagaaaagcagcgggtgctcctagaggctagaaaagcagtcggg  |
| Mpmv4     | ctgtcagcagttggttggggaccctgctgaccgggagaagaaaagcagcgggtgctcctagaggctagaaaagcagtcggg  |
| Mpmv5     | ctgtcagcagttggttggggaccctgctgaccggagaaAaaaagcagcgggtgctcctagaggctagaaaagcagtcggg   |
| Mpmv6     | ctgtcagcagttggttggggaccctgctgaccgggagaagaaaagcagcgggtgctcctagaggctagaaaagcagtcggg  |
| Mpmv7     | ctgtcagcagttggttggggaccctgctgaccgggagaagaaaagcagcgggtgctcctagaggctagaaaagcagtcggg  |
| Mpmv8     | ctgtcagcagttggttggggaccctgctgaccgggagaagaaaagcagcgggtgctcctagaggctagaaaagcagtcggg  |
| Mpmv9     | ctgtcagcagttggttggggaccctgctgaccgggagaagaaaagcagcgggtgctcctagaggctagaaaagcagtcggg  |
|           |                                                                                    |
| MPMV_CONS | GCAATGATGGACGCCCCACTCAGTTGCCTAATGAAATCAATGCTGCCTTTCCCTTGAGCGCCCTGATTGGGATTACACC    |
| Mpmv1     | gcaatgatggacgccccactcagttgcctaataatgaaatcaatgctgcctttcccttgagcgccctgattgggattacacc |
| Mpmv10    | gcaatgatggacgccccactcagttgcctaataatgaaatcaatgctgcctttcccttgagcgccctgattgggattacacc |
| Mpmv11    | gcaatgatggacgccccactcagttgcctaataatgaaatcaatgctgcctttccctCgagcgccctgattgggattacacc |
| Mpmv12    | gcaatgatggacgccccactcagttgcctaataatgaaatcaatgctgcctttcccttgagcgccctgattgggattacacc |
| Mpmv13    | gcaatgatggacgccccactcagttgcctaataatgaaatcaatgctgcctttcccttgagcgccctgattgggattacacc |
| Mpmv2     | gcaatgatggacgccccactcagttgcctaataatgaaatcaatgctgcctttcccttgagcgccctgattgggattacacc |
| Mpmv3     | gcaatgatggacgccccactcagttgcctaataatgaaatcaatgctgcctttcccttgagcgccctgattgggattacacc |
| Mpmv4     | gcaatgatggacgccccactcagttgcctaataatgaaatcaatgctgcctttcccttgagcgccctgattgggattacacc |
| Mpmv5     | gcaatgatggacgccccactcagttgcctaataatgaaatcaatgctgcctttcccttgagcgccctgattgggattacacc |
| Mpmv6     | gcaatgatggacgccccactcagttgcctaataatgaaatcaatgctgcctttcccttgagcgccctgattgggattacacc |
| Mpmv7     | gcaatgatggacgccccactcagttgcctaataatgaaatcaatgctgcctttcccttgagcgccctgattgggattacacc |
| Mpmv8     | gcaatgatggacgccccactcagttgcctaataatgaaatcaatgctgcctttcccttgagcgccctgattgggattacacc |
| Mpmv9     | gcaatgatggacgccccactcagttgcctaataatgaaatcaatgctgcctttcccttgagcgccctgattgggattacacc |

|           |                                                                                   |
|-----------|-----------------------------------------------------------------------------------|
| MPMV_CONS | ACTACAGAAGGTAGGAACCACTAGTCCTCTATCGCCAGTTGCTCTTAGCGGGTCTCCAAAACGCGGGCAGAAGCCCCAC   |
| Mpmv1     | actacagaaggttaggaaccacctagtcctctatcgccagttgctcttagcgggtctccaaaacgcgggcagaagccccac |
| Mpmv10    | actacagaaggttaggaaccacctagtcctctatcgccagttgctcttagcgggtctccaaaacgcgggcagaagccccac |
| Mpmv11    | actacagaaggttaggaaccacctagtcctctatcgccagttgctcttagcgggtctccaaaacgcgggcagaagccccac |
| Mpmv12    | actacagaaggttaggaaccacctagtcctctatcgccagttgctcttagcgggtctccaaaacgcgggcagaagccccac |
| Mpmv13    | actacagaaggttaggaaccacctagtcctctatcgccagttgctcttagcgggtctccaaaacgcgggcagaagccccac |
| Mpmv2     | actacagaaggttaggaaccacctagtcctctatcgccagttgctcttagcgggtctccaaaacgcgggcagaagccccac |
| Mpmv3     | actacagaaggttaggaaccacctagtcctctatcgccagttgctcttagcgggtctccaaaacgcgggcagaagccccac |
| Mpmv4     | actacagaaggttaggaaccacctagtcctctatcgccagttgctcttagcgggtctccaaaacgcgggcagaagccccac |
| Mpmv5     | actacagaaggttaggaaccacctagtcctctatcgccagttgctcttagcgggtctccaaaacgcgggcagaagccccac |
| Mpmv6     | actacagaaggttaggaaccacctagtcctctatcgccagttgctcttagcgggtctccaaaacgcgggcagaagccccac |
| Mpmv7     | actacagaaggttaggaaccacctagtcctctatcgccagttgctcttagcgggtctccaaaacgcgggcagaagccccac |
| Mpmv8     | actacagaaggttaggaaccacctagtcctctatcgccagttgctcttagcgggtctccaaaacgcgggcagaagccccac |
| Mpmv9     | actacagaaggttaggaaccacctagtcctctatcgccagttgctcttagcgggtctccaaaacgcgggcagaagccccac |
|           |                                                                                   |
| MPMV_CONS | CAATTTGGCCAAGGTAAAAGGGATAACCCAGGGACCTAATGAGTCTCCCTCAGCCTTTTTAGAGAGACTCAAGGAGGCCT  |
| Mpmv1     | caatttggccaaggttaaaggataaaccaggacctaataagtgctctccctcagccttttagagagactcaaggaggcct  |
| Mpmv10    | caatttggccaaggttaaaggataaaccaggacctaataagtgctctccctcagccttttagagagactcaaggaggcct  |
| Mpmv11    | caatttggccaaggttaaaggataaaccaggacctaataagtgctctccctcagccttttagagagactcaaggaggcct  |
| Mpmv12    | caatttggccaaggttaaaggataaaccaggacctaataagtgctctccctcagccttttagagagactcaaggaggcct  |
| Mpmv13    | caatttggccaaggttaaaggataaaccaggacctaataagtgctctccctcagccttttagagagactcaaggaggcct  |
| Mpmv2     | caatttggccaaggttaaaggataaaccaggacctaataagtgctctccctcagccttttagagagactcaaggaggcct  |
| Mpmv3     | caatttggccaaggttaaaggataaaccaggacctaataagtgctctccctcagccttttagagagactcaaggaggcct  |
| Mpmv4     | caatttggccaaggttaaaggataaaccaggacctaataagtgctctccctcagccttttagagagactcaaggaggcct  |
| Mpmv5     | caatttggccaaggttaaaggataaaccaggacctaataagtgctctccctcagccttttagagagactcaaggaggcct  |
| Mpmv6     | caatttggccaaggttaaaggataaaccaggacctaataagtgctctccctcagccttttagagagactcaaggaggcct  |
| Mpmv7     | caatttggccaaggttaaaggataaaccaggacctaataagtgctctccctcagccttttagagagactcaaggaggcct  |
| Mpmv8     | caatttggccaaggttaaaggataaaccaggacctaataagtgctctccctcagccttttagagagactcaaggaggcct  |
| Mpmv9     | caatttggccaaggttaaaggataaaccaggacctaataagtgctctccctcagccttttagagagactcaaggaggcct  |
|           |                                                                                   |
| MPMV_CONS | ATCGCAGGTACACTCCTTATGACCCTGAGGACCCAGGGCAAGAAACCAATGTGTCTATGTCATTCTGGCAGTCTGCC     |
| Mpmv1     | atcgccaggtacactccttatgacctgaggaccagggaagaaaccaatgtgtctatgtcattcatctggcagctctgcc   |
| Mpmv10    | atcgccaggtacactccttatgacctgaggaccagggaagaaaccaatgtgtctatgtcattcatctggcagctctgcc   |
| Mpmv11    | atcgccaggtacactccttatgacctgaggaccagggaagaaaccaatgtgtctatgtcattcatctggcagctctgcc   |
| Mpmv12    | atcgccaggtacactccttatgacctgaggaccagggaagaaaccaatgtgtctatgtcattcatctggcagctctgcc   |
| Mpmv13    | atcgccaggtacactccttatgacctgaggaccagggaagaaaccaatgtgtctatgtcattcatctggcagctctgcc   |
| Mpmv2     | atcgccaggtacactccttatgacctgaggaccagggaagaaaccaatgtgtctatgtcattcatctggcagctctgcc   |
| Mpmv3     | atcgccaggtacactccttatgacctgaggaccagggaagaaaccaatgtgtctatgtcattcatctggcagctctgcc   |
| Mpmv4     | atcgccaggtacactccttatgacctgaggaccagggaagaaaccaatgtgtctatgtcattcatctggcagctctgcc   |
| Mpmv5     | atcgccaggtacactccttatgacctgaggaccagggaagaaaccaatgtgtctatgtcattcatctggcagctctgcc   |
| Mpmv6     | atcgccaggtacactccttatgacctgaggaccagggaagaaaccaatgtgtctatgtcattcatctggcagctctgcc   |
| Mpmv7     | atcgccaggtacactccttatgacctgaggaccagggaagaaaccaatgtgtctatgtcattcatctggcagctctgcc   |
| Mpmv8     | atcgccaggtacactccttatgacctgaggaccagggaagaaaccaatgtgtctatgtcattcatctggcagctctgcc   |
| Mpmv9     | atcgccaggtacactccttatgacctgaggaccagggaagaaaccaatgtgtctatgtcattcatctggcagctctgcc   |
|           |                                                                                   |
| MPMV_CONS | CCGGATATCGGGCGAAAGTTAGAGCGGTTAGAAGATTAAAGAGCAAGACCTTAGGAGACTTAGTGAGGGAAGCTGAAAA   |
| Mpmv1     | ccggatatcgggcgaaagttagagcggttagaagatttaaagagcaagaccttaggagacttagtgaggggaagctgaaaa |
| Mpmv10    | ccggatatcgggcgaaagttagagcggttagaagatttaaagagcaagaccttaggagacttagtgaggggaagctgaaaa |
| Mpmv11    | ccggatatcgggcgaaagttagagcggttagaagatttaaagagcaagaccttaggagacttagtgaggggaagctgaaaa |
| Mpmv12    | ccggatatcgggcgaaagttagagcggttagaagatttaaagagcaagaccttaggagacttagtgaggggaagctgaaaa |
| Mpmv13    | ccggatatcgggcgaaagttagagcggttagaagatttaaagagcaagaccttaggagacttagtgaggggaagctgaaaa |
| Mpmv2     | ccggatatcgggcgaaagttagagcggttagaagatttaaagagcaagaccttaggagacttagtgaggggaagctgaaaa |
| Mpmv3     | ccggatatcgggcgaaagttagagcggttagaagatttaaagagcaagaccttaggagacttagtgaggggaagctgaaaa |
| Mpmv4     | ccggatatcgggcgaaagttagagcggttagaagatttaaagagcaagaccttaggagacttagtgaggggaagctgaaaa |
| Mpmv5     | ccggatatcgggcgaaagttagagcggttagaagatttaaagagcaagaccttaggagacttagtgaggggaagctgaaaa |
| Mpmv6     | ccggatatcgggcgaaagttagagcggttagaagatttaaagagcaagaccttaggagacttagtgaggggaagctgaaaa |
| Mpmv7     | ccggatatcgggcgaaagttagagcggttagaagatttaaagagcaagaccttaggagacttagtgaggggaagctgaaaa |
| Mpmv8     | ccggatatcgggcgaaagttagagcggttagaagatttaaagagcaagaccttaggagacttagtgaggggaagctgaaaa |
| Mpmv9     | ccggatatcgggcgaaagttagagcggttagaagatttaaagagcaagaccttaggagacttagtgaggggaagctgaaaa |

|           |                                                                                   |
|-----------|-----------------------------------------------------------------------------------|
| MPMV_CONS | GATCTTTAATAAACGAGAAACCCCGAAGAAAGAGAGGAACGTATCAGGAGAGAAACAGAGGAAAAAGAAGAACGCCGTA   |
| Mpmv1     | gatctttaataaacgagaaacccccggaagaaagagaggaacgtatcaggagagaaacagaggaaaaagaagaacgccgta |
| Mpmv10    | gatctttaataaacgagaaacccccggaagaaagagaggaacgtatcaggagagaaacagaggaaaaagaagaacgccgta |
| Mpmv11    | gatctttaataaacgagaaacccccggaagaaagagaggaacgtatcaggagagaaacagaggaaaaagaagaacgccgta |
| Mpmv12    | gatctttaataaacgagaaacccccggaagaaagagaggaacgtatcaggagagaaacagaggaaaaagaagaacgccgta |
| Mpmv13    | gatctttaataaacgagaaacccccggaagaaagagaggaacgtatcaggagagaaacagaggaaaaagaAaacgccgta  |
| Mpmv2     | gatctttaataGacgagaaacccccggaagaaagagaggaacgtatcaggagagaaacagaggaaaaagaagaacgccgta |
| Mpmv3     | gatctttaataaacgagaaacccccggaagaaagagaggaacgtatcaggagagaaacagaggaaaaagaagaacgccgta |
| Mpmv4     | gatctttaataaacgagaaacccccggaagaaagagaggaacgtatcaggagagaaacagaggaaaaagaagaacgccgta |
| Mpmv5     | gatctttaataaacgagaaacccccggaagaaagagaggaacgtatcaggagagaaacagaggaaaaagaagaacgccgta |
| Mpmv6     | gatctttaataaacgagaaacccccggaagaaagagaggaacgtatcaggagagaaacagaggaaaaagaagaacgccgta |
| Mpmv7     | gatctttaataaacgagaaacccccggaagaaagagaggaacgtatcaggagagaaacagaggaaaGagaagaacgccgta |
| Mpmv8     | gatctttaataaacgagaaacccccggaagaaagagaggaacgtatcaggagagaaacagaggaaaaagaagaacgccgta |
| Mpmv9     | gatctttaataaacgagaaacccccggaagaaagagaggaacgtatcaggagagaaacagaggaaaaagaagaacgccgta |

  

|           |                                                                                   |
|-----------|-----------------------------------------------------------------------------------|
| MPMV_CONS | GGGCAGAGGATGAGCAGAAAGAGAAAGAAAGGGACCCGAGAAGACATAGAGAGATGAGCAAGCTCTTGGCCACTGTAGTT  |
| Mpmv1     | gggcagaggatgagcagaaagagaaagaaagggaccgcagaagacatagagagatgagcaagctcttggccactgtagtt  |
| Mpmv10    | gggcagaggatgagcagaaagagaaagaaagggaccgcagaagacatagagagatgagcaagctcttggccactgtagtt  |
| Mpmv11    | gggcagaggatgagcAaaagagaaagaaagggaccgcagaagacatagagagatgagcaagctcttggccactgtagtt   |
| Mpmv12    | gggcagaAagatgagcagaaagagaaagaaagggaccgcagaagacatagagagatgagcaagctcttggccactgtagtt |
| Mpmv13    | gggcagaggatgagcagaaagagaaagaaagggaccgcagaagacatagagagatgagcaagctcttggccactgtagtt  |
| Mpmv2     | gggcagaggatgagcagaaagagaaagaaagggaccgcagaagacatagagagatgagcaagctcttggccactgtagtt  |
| Mpmv3     | gggcagaggatgagcagaaagagaaagaaagggaccgcagaagacatagagagatgagcaagctcttggccactgtagtt  |
| Mpmv4     | gggcagaggatgagcagaaagagaaagaaagggaccgcagaagacatagagagatgagcaagctcttggccactgtagtt  |
| Mpmv5     | gggcagaAagatgagcagaaagagaaagaaagggaccgcagaagacatagagagatgagcaagctcttggccactgtagtt |
| Mpmv6     | gggcagaggatgagcagaaagagaaagaaagggaccgcagaagacatagagagatgagcaagctcttggccactgtagtt  |
| Mpmv7     | gggcagaggatgagcagaaagagaaagaaagggaccgcagaagacatagagagatgagcaagctcttggccactgtagtt  |
| Mpmv8     | gggcagaggatgagcagaaagagaaagaaagggaccgcagaagacatagagagatgagcaagctcttggccactgtagtt  |
| Mpmv9     | gggcagaggatgagcagaaagagaaagaaagggaccgcagaagacatagagagatgagcaagctcttggccactgtagtt  |

  

|           |                                                                                       |
|-----------|---------------------------------------------------------------------------------------|
| MPMV_CONS | ATTGGTCAGAGACAGGATAGACAGGGGGGAGAGCGGAAGAGGCCCAACTTGATAAGGATCAATGCGCCTACTGCAAAGA       |
| Mpmv1     | atttggtcagagacaggatagacaggggggagagcggaagagggccccaacttgataaggatcaatgcgccctactgcaaaga   |
| Mpmv10    | atttggtcagagacaggatagacaggggggagagcggaagagggccccaacttgataaggatcaatgcgccctactgcaaaga   |
| Mpmv11    | atttggtcagagacaggatagacaggggggagagcggaagagggccccaacttgataaAagatcaatgcgccctactgcaaaga  |
| Mpmv12    | atttggtcagagacaggatagacaggggggagagcggaagagggccccaacttgataaggatcaatgcgccctactgcaaaga   |
| Mpmv13    | atttggtcagagacaggatagacaAaggggggagagcggaagagggccccaacttgataaggatcaatgcgccctactgcaaaga |
| Mpmv2     | atttggtcagagacaggatagacaggggggagagcggaagagggccccaacttgataaggatcaatgcgccctactgcaaaga   |
| Mpmv3     | atttggtcagagacaggatagacaggggggagagcggaagagggccccaacttgataaggatcaatgcgccctactgcaaaga   |
| Mpmv4     | atttggtcagagacaggatagacaggggggagagcggaagagggccccaacttgataaggatcaatgcgccctactgcaaaga   |
| Mpmv5     | atttggtcagagacaggatagacaggggggagagcggaagagggccccaacttgataaggatcaatgcgccctactgcaaaga   |
| Mpmv6     | atttggtcagagacaggatagacaggggggagagcggaagagggccccaacttgataaggatcaatgcgccctactgcaaaga   |
| Mpmv7     | atttggtcagagacaggatagacaggggggagagcggaagagggccccaacttgataaggatcaatgcgccctactgcaaaga   |
| Mpmv8     | atttggtcagagacaggatagacaggggggagagcggaagagggccccaacttgataaggatcaatgcgccctactgcaaaga   |
| Mpmv9     | atttggtcagagacaggatagacaggggggagagcggaagagggccccaacttgataaggatcaatgcgccctactgcaaaga   |

  

|           |                                                                                  |
|-----------|----------------------------------------------------------------------------------|
| MPMV_CONS | AAAGGGACACTGGGCTAAAGACTGCCCAAAGAAGCCACGAGGGCCCCGAGGACCGAGGCCCCAGACCTCCCTCCTGACCT |
| Mpmv1     | aaagggacactgggctaagactgcccaaagaagccacgagggccccgaggaccgagggccccagacctccctcctgacct |
| Mpmv10    | aaagggacactgggctaagactgcccaaagaagccacgagggccccgaggaccgagggccccagacctccctcctgacct |
| Mpmv11    | aaagggacactgggctaagactgcccaaagaagccacgagggccccgaggaccgagggccccagacctccctcctgacct |
| Mpmv12    | aaagggacactgggctaagactgcccaaagaagccacgagggccccgaggaccgagggccccagacctccctcctgacct |
| Mpmv13    | aaagggacactgggctaagactgcccaaagaagccacgagggccccgaggaccgagggccccagacctccctcctgacct |
| Mpmv2     | aaagggacactgggctaagactgcccaaagaagccacgagggccccgaggaccgagggccccagacctccctcctgacct |
| Mpmv3     | aaagggacactgggctaagactgcccaaagaagccacgagggccccgaggaccgagggccccagacctccctcctgacct |
| Mpmv4     | aaagggacactgggctaagactgcccaaagaagccacgagggccccgaggaccgagggccccagacctccctcctgacct |
| Mpmv5     | aaagggacactgggctaagactgcccaaagaagccacgagggccccgaggaccgagggccccagacctccctcctgacct |
| Mpmv6     | aaagggacactgggctaagactgcccaaagaagccacgagggccccgaggaccgagggccccagacctccctcctgacct |
| Mpmv7     | aaagggacactgggctaagactgcccaaagaagccacgagggccccgaggaccgagggccccagacctccctcctgacct |
| Mpmv8     | aaagggacactgggctaagactgcccaaagaagccacgagggccccgaggaccgagggccccagacctccctcctgacct |
| Mpmv9     | aaagggacactgggctaagactgcccaaagaagccacgagggccccgaggaccgagggccccagacctccctcctgacct |

|           |                                                                                    |
|-----------|------------------------------------------------------------------------------------|
| MPMV_CONS | TAGGTGACGCTCAGGTTGTGGGACCAATGGGACAGCCCCCTGCAAGTGCTGACCCTAAACATAGAAGATGAGTATCGGCTA  |
| Mpmv1     | taggtgacgctcaggttAgtgggaccaatgggacagcccctgcaagtgctgaccctaatacatagaagatgagtatcggcta |
| Mpmv10    | taggtgac-ctcaggttgtgggaccaatgggacagccTctgcaagtgctgaccctaatacatagaagatgagtatcggcta  |
| Mpmv11    | taggtgacgctcaggttAgtgggaccaatgggacagcccctgcaagtgctgaccctaatacatagaagatgagtatcggcta |
| Mpmv12    | taggtgacgctcaggttgtgggaccaatgggacagcccctgcaagtgctgaccctaatacatagaagatgagtatcggcta  |
| Mpmv13    | taggtgacgctcaggttgtgggaccaatgggacagcccctgcaagtgctgaccctaatacatagaagatgagtatcggcta  |
| Mpmv2     | taggtgacgctcaggttgtgggaccaatgggacagcccctgcaagtgctgaccctaatacataAaagatgagtatcggcta  |
| Mpmv3     | taggtgacgctcaggttgtgggaccaatgggacagcccctgcaagtgctgaccctaatacatagaagatgagtatcggcta  |
| Mpmv4     | taggtgacgctcaggttAgtgggaccaatgggacagcccctgcaagtgctgaccctaatacatagaagatgagtatcggcta |
| Mpmv5     | taggtgacgctcaggttgtgggaccaatgggacagcccctgcaagtgctgaccctaatacatagaagatgagtatcggcta  |
| Mpmv6     | taggtgacgctcaggttgtgggaccaatgggacagcccctgcaagtgctgaccctaatacatagaagatgagtatcggcta  |
| Mpmv7     | taggtgacgctcaggttgtgggaccaatgggacagcccctgcaagtgctgaccctaatacatagaagatgagtatcggcta  |
| Mpmv8     | taggtgacgctcaggttAgtgggaccaatgggacagcccctgcaagtgctgaccctaatacatagaagatgagtatcggcta |
| Mpmv9     | taggtgacgctcaggttgtgggaccaatgggacagcccctgcaagtgctgaccctaatacatagaagatgagtatcggcta  |

  

|           |                                                                                    |
|-----------|------------------------------------------------------------------------------------|
| MPMV_CONS | CATGAGACCTCAAAAGAGCCGGATGTTTCTCTAGGGTCCACATGGCTTTCTGATTTTCCCCAGGCCTGGGCGGAAACCGG   |
| Mpmv1     | catgagaccCaaaagagccggatgtttctctaggggtccacatggcctttctgattttccccaggcctgggcggaaaccgg  |
| Mpmv10    | catgagacctcaaaagagccggatgtttctctaggggtccacatggcctttctgattttccccaggcctgggcggaaaccgg |
| Mpmv11    | catgagacctcaaaagagccggatgtttctctaggggtccacatggcctttctgattttccccaggcctgggcggaaaccgg |
| Mpmv12    | catgagacctcaaaagagccggatgtttctctaggggtccacatggcctttctgattttccccaggcctgggcggaaaccgg |
| Mpmv13    | catgagacctcaaaagagccggatgtttctctaggggtccacatggcctttctgattttccccaggcctgggcggaaaccgg |
| Mpmv2     | catgagacctcaaaagagccggatgtttctctaggggtccacatggcctttctgattttccccaggcctgggcggaaaccgg |
| Mpmv3     | catgagacctcaaaagagccggatgtttctctaggggtccacatggcctttctgattttccccaggcctgggcggaaaccgg |
| Mpmv4     | catgagaccCaaaagagccggatgtttctctaggggtccacatggcctttctgattttccccaggcctgggcggaaaccgg  |
| Mpmv5     | catgagacctcaaaagagccggatgtttctctaggggtccacatggcctttctgattttccccaggcctgggcAAaaaccgg |
| Mpmv6     | catgagacctcaaaagagccggatgtttctctaggggtccacatggcctttctgattttccccaggcctgggcggaaaccgg |
| Mpmv7     | catgagacctcaaaagagccggatgtttctctaggggtccacatggcctttctgattttccccaggcctgggcggaaaccgg |
| Mpmv8     | catgagaccCaaaagagccggatgtttctctaggggtccacatggcctttctgattttccccaggcctgggcggaaaccgg  |
| Mpmv9     | catgagacctcaaaagagccggatgtttctctaggggtccacatggcctttctgattttccccaggcctgggcggaaaccgg |

  

|           |                                                                                    |
|-----------|------------------------------------------------------------------------------------|
| MPMV_CONS | GGGCATGGGACTGGCAGTTCGCCAAGCTCCTCTGATCATACTCTGAAGGCAACCTCTACCCCCGTGTCCATAAAACAAT    |
| Mpmv1     | gggcatgggactggcagttcgccaagctcctctgatcataacctctgaaggcaacctctacccccgtgtccataaaaacaat |
| Mpmv10    | gggcatgggactggcagttcgccaagctcctctgatcataacctctgaaggcaacctctacccccgtgtccataaaa- --- |
| Mpmv11    | gggcatgggactggcagttcgccaagctcctctgatcataacctctgaaggcaacctctacccccgtgtccataaaaacaat |
| Mpmv12    | gggcatgggactggcagttcgccaagctcctctgatcataacctctgaaggcaacctctacccccgtgtccataaaaacaat |
| Mpmv13    | gggcatgggactggcagttcgccaagctcctctgatcataacctctgaaggcaacctctacccccgtgtccataaaaacaat |
| Mpmv2     | gggcatgggactggcagttcgccaagctcctctgatcataacctctgaaggcaacctctacccccgtgtccataaaaacaat |
| Mpmv3     | gggcatgggactggcagttcgccaagctcctctgatcataacctctgaaggcaacctctacccccgtgtccataaaaacaat |
| Mpmv4     | gggcatgggactggcagttcgccaagctcctctgatcataacctctgaaggcaacctctacccccgtgtccataaaaacaat |
| Mpmv5     | gggcatgggactggcagttcgccaagctcctctgatTataacctctgaaggcaacctctacccccgtgtccataaaaacaat |
| Mpmv6     | gggcatgggactggcagttcgccaagctcctctgatcataacctctgaaggcaacctctacccccgtgtccataaaaacaat |
| Mpmv7     | gggcatgggactggcagttcgccaagctcctctgatcataacctctgaaggcaacctctacccccgtgtccataaaaacaat |
| Mpmv8     | gggcatgggactggcagttcgccaagctcctctgatcataacctctgaaggcaacctctacccccgtgtccataaaaacaat |
| Mpmv9     | gggcatgggactggcagttcgccaagctcctctgatcataacctctgaaggcaacctctacccccgtgtccataaaaacaat |

  

|           |                                                                                   |
|-----------|-----------------------------------------------------------------------------------|
| MPMV_CONS | ACCCCATGTCAACAAGAAGCCAGACTGGGGATCAAGCCCCACATACAGAGACTGTTGGACCAGGGAATACTGGTACCTTGC |
| Mpmv1     | accccatgtcacagaagccagactggggatcaagTcccacatacagagactgttggaccaggggaataactggtaccctgc |
| Mpmv10    | -----                                                                             |
| Mpmv11    | accccatgtcacagaagccagactggggatcaagccccacatacagagactgttggaccaggggaataactggtaccctgc |
| Mpmv12    | accccatgtcacagaagccagactggggatcaagccccacatacagagactgttggaccaggggaataactggtaccctgc |
| Mpmv13    | accccatgtcacagaagccagactggggatcaagccccacatacagagactgttggaccaggggaataactggtaccctgc |
| Mpmv2     | accccatgtcacagaagccagactggggatcaagccccacatacagagactgttggaccaggggaataactggtaccctgc |
| Mpmv3     | accccatgtcacagaagccagactggggatcaagccccacatacagagactgttggaccaggggaataactggtaccctgc |
| Mpmv4     | accccatgtcacagaagccagactggggatcaagTcccacatacagagactgttggaccaggggaataactggtaccctgc |
| Mpmv5     | accccatgtcacagaagccagactggggatcaagccccacatacagagactgttggaccaggggaataactggtaccctgc |
| Mpmv6     | accccatgtcacagaagccagactAgggatcaagccccacatacagagactgttggaccaggggaataactggtaccctgc |
| Mpmv7     | accccatgtcacagaagccagactggggatcaagccccacatacagagactgttggaccaggggaataactggtaccctgc |
| Mpmv8     | accccatgtcacagaagccagactggggatcaagTcccacatacagagactgttAgaccaggggaataactggtaccctgc |
| Mpmv9     | accccatgtcacagaagccagactggggatcaagccccacatacagagactgttggaccaggggaataactggtaccctgc |

|           |                                                                                    |
|-----------|------------------------------------------------------------------------------------|
| MPMV_CONS | CAGTCCCCCTGGAACACGCCCTGCTACCCGTTAAGAAACCAGGGACTAATGATTACAGGCCTGTCCAAGATCTGAGAGA    |
| Mpmv1     | cagtccccctggaacacgccccctgctacccggttaagaaaccagggactaatgattacaggcctgtccaagatctgagaga |
| Mpmv10    | -----                                                                              |
| Mpmv11    | cagtccccctggaacacgccccctgctacccggttaagaaaccagggactaatgattacaggcctgtccaagatctgagaga |
| Mpmv12    | cagtccccctggaacacgccccctgctacccggttaagaaaccagggactaatgattacaggcctgtccaagatctgagaga |
| Mpmv13    | cagtccccctggaacacgccccctgctacccggttaagaaaccagggactaatgattacaggcctgtccaagatctgagaga |
| Mpmv2     | cagtccccctggaacacgccccctgctacccggttaagaaaccagggactaatgattacaggcctgtccaagatctgagaga |
| Mpmv3     | cagtccccctggaacacgccccctgctacccggttaagaaaccagggactaatgattacaggcctgtccaagatctgagaga |
| Mpmv4     | cagtccccctggaacacgccccctgctacccggttaagaaaccagggactaatgattacaggcctgtccaagatctgagaga |
| Mpmv5     | cagtccccctggaacacgccccctgctacccggttaagaaaccagggactaatgattacaggcctgtccaagatctgagaga |
| Mpmv6     | cagtccccctggaacacgccccctgctacccggttaagaaaccagggactaatgattacaggcctgtccaagatctgagaga |
| Mpmv7     | cagtccccctggaacacgccccctgctacccggttaagaaaccagggactaatgattacaggcctgtccaagatctgagaga |
| Mpmv8     | cagtccccctggaacacgccccctgctacccggttaagaaaccagggactaatgattacaggcctgtccaagatctgagaga |
| Mpmv9     | cagtccccctggaacacgccccctgctacccggttaagaaaccagggactaatgattacaggcctgtccaagatctgagaga |
| MPMV_CONS | AGTCAACAAGCGGGTGAAGACATCCACCCACCGTGCCCAACCCCTTACAACCTCTTGAGCGGGCTCCCACCGTCCCACC    |
| Mpmv1     | agtcaacaagcgggtggaagacatccacccacccgtgcccaacccttacaacctcttgagcgggctcccaccgtcccacc   |
| Mpmv10    | -----                                                                              |
| Mpmv11    | agtcaacaagcgggtggaagacatccacccacccgtgcccaacccttacaacctcttgagcgggctcccaccgtcccacc   |
| Mpmv12    | agtcaacaagcgggtggaagacatccacccacccgtgcccaacccttacaacctcttgagcgggctcccaccgtcccacc   |
| Mpmv13    | agtcaacaagcgggtggaagacatccacccacccgtgcccaacccttacaacctcttgagcgggctcccaccgtcccacc   |
| Mpmv2     | agtcaacaagcgggtggaagacatccacccacccgtgcccaacccttacaacctcttgagcgggctcccaccgtcccacc   |
| Mpmv3     | agtcaacaagcgggtggaagacatccacccacccgtgcccaacccttacaacctcttgagcgggctcccaccgtcccacc   |
| Mpmv4     | agtcaacaagcgggtggaagacatccacccacccgtgcccaacccttacaacctcttgagcgggctcccaccgtcccacc   |
| Mpmv5     | agtcaacaagcgggtggaagacatccacccacccgtgcccaacccttacaacctcttgagcgggctcccaccgtcccacc   |
| Mpmv6     | agtcaacaagcgggtggaagacatccacccacccgtgcccaacccttacaacctcttgagcgggctcccaccgtcccacc   |
| Mpmv7     | agtcaacaagcgggtggaagacatccacccacccgtgcccaacccttacaacctcttgagcgggctcccaccgtcccacc   |
| Mpmv8     | agtcaacaagcgggtggaagacatccacccacccgtgcccaacccttacaacctcttgagcgggctcccaccgtcccacc   |
| Mpmv9     | agtcaacaagcgggtggaagacatccacccacccgtgcccaacccttacaacctcttgagcgggctcccaccgtcccacc   |
| MPMV_CONS | AGTGGTACACTGTGCTTGACTTAAAGGATGCCTTTTTCTGCCTGAGACTCCACCCACCAGTCAGCCTCTCTTCGCCTTT    |
| Mpmv1     | agtgggtacactgtgcttgacttaaaggatgcctttttctgcctgagactccacccaccagtcagcctctcttcgccttt   |
| Mpmv10    | -----                                                                              |
| Mpmv11    | agtgggtacactgtgcttgacttaaaggatgcctttttctgcctgagactccacccaccagtcagcctctcttcgccttt   |
| Mpmv12    | agtgggtacactgtgcttgacttaaaggatgcctttttctgcctgagactccacccaccagtcagcctctcttcgccttt   |
| Mpmv13    | agtgggtacactgtgcttgacttaaaggatgcctttttctgcctgagactccacccaccagtcagcctctcttcgccttt   |
| Mpmv2     | agtgggtacactgtgcttgacttaaaggatgcctttttctgcctgagactccacccaccagtcagcctctcttcgccttt   |
| Mpmv3     | agtgggtacactgtgcttgacttaaaggatgcctttttctgcctgagactccacccaccagtcagcctctcttcgccttt   |
| Mpmv4     | agtgggtacactgtgcttgacttaaaggatgcctttttctgcctgagactccacccaccagtcagcctctcttcgccttt   |
| Mpmv5     | agtgggtacactgtgcttgacttaaaggatgcctttttctgcctgagactccacccaccagtcagcctctcttcgccttt   |
| Mpmv6     | agtgggtacactgtgcttgacttaaaggatgcctttttctgcctgagactccacccaccagtcagcctctcttcgccttt   |
| Mpmv7     | agtgggtacactgtgcttgacttaaaggatgcctttttctgcctgagactccacccaccagtcagcctctcttcgccttt   |
| Mpmv8     | agtgggtacactgtgcttgacttaaaggatgcctttttctgcctgagactccacccaccagtcagcctctcttcgccttt   |
| Mpmv9     | agtgggtacactgtgcttgacttaaaggatgcctttttctgcctgagactccacccaccagtcagcctctcttcgccttt   |
| MPMV_CONS | GAGTGGAGAGACCCAGAGATGGGAATCTCAGGACAATTAACCTGGACCAGACTCCCACAGGGTTTCAAAAACAGTCCCAC   |
| Mpmv1     | gagtggagagagaccagagatgggaatctcaggacaattaacctggaccagactcccacaggggtttcaaaaacagtcccac |
| Mpmv10    | -----                                                                              |
| Mpmv11    | gagtggagagagaccagagatgggaatctcaggacaattaacctggaccagactcccacaggggtttcaaaaacagtcccac |
| Mpmv12    | gagtggagagagaccagagatgggaatctcaggacaattaacctggaccagactcccacaggggtttcaaaaacagtcccac |
| Mpmv13    | gagtggagagagaccagagatgggaatctcaggacaattaacctggaccagactcccacaggggtttcaaaaacagtcccac |
| Mpmv2     | gagtggagagagaccagagatgggaatctcaggacaattaacctggaccagactcccacaggggtttcaaaaacagtcccac |
| Mpmv3     | gagtggagagagaccagagatgggaatctcaggacaattaacctggaccagactcccacaggggtttcaaaaacagtcccac |
| Mpmv4     | gagtggagagagaccagagatgggaatctcaggacaattaacctggaccagactcccacaggggtttcaaaaacagtcccac |
| Mpmv5     | gagtggagagagaccagagatgggaatctcaggacaattaacctggaccagactcccacaggggtttcaaaaacagtcccac |
| Mpmv6     | gagtggagagagaccagagatgggaatctcaggacaattaacctggaccagactcccacaggggtttcaaaaacagtcccac |
| Mpmv7     | gagtggagagagaccagagatgggaatctcaggacaattaacctggaccagactcccacaggggtttcaaaaacagtcccac |
| Mpmv8     | gagtggagagagaccagagatgggaatctcaggacaattaacctggaccagactcccacaggggtttcaaaaacagtcccac |
| Mpmv9     | gagtggagagagaccagagatgggaatctcaggacaattaacctggaccagactcccacaggggtttcaaaaacagtcccac |

|           |                                                                                    |
|-----------|------------------------------------------------------------------------------------|
| MPMV_CONS | CCTGTTTGATGAGGCACTGCACAGAGACCTAGCAGGCTTCCGGATCCAGCACCCAGACTTGATCCTGCTACAGTACGTGG   |
| Mpmv1     | cctgtttgatgaggcactgcacagagacctagcaggcttccggatccagcaccagacttgatcctgctacagtacgtgg    |
| Mpmv10    | -----                                                                              |
| Mpmv11    | cctgtttgatgaggcactgcacagagacctagcaggcttccggatccagcaccagacttgatcctgctacagtacgtgg    |
| Mpmv12    | cctgtttgatgaggcactgcacagagacctagcaggcttccggatccagcaccagacttgatcctgctacagtacgtgg    |
| Mpmv13    | cctgtttgatgaggcactgcacagagacctagcaggcttccggatccagcaccagacttgatcctgctacagtacgtgg    |
| Mpmv2     | cctgtttgatgaggcactgcacagagacctagcaggcttccggatccagcaccagacttgatcctgctacagtacgtgg    |
| Mpmv3     | cctgtttgatgaggcactgcacagagacctagcaggcttccggatccagcaccagacttgatcctgctacagtacgtgg    |
| Mpmv4     | cctgtttgatgaggcactgcacagagacctagcaggcttccggatccagcaccagacttgatcctgctacagtacgtgg    |
| Mpmv5     | cctgtttAatgaggcactgcacagagacctagcaggcttccggatccagcaccagacttgatcctgctacagtacgtgg    |
| Mpmv6     | cctgtttAatgaggcactgcacagagacctagcaggcttccggatccagcaccagacttgatcctgctacagtacgtgg    |
| Mpmv7     | cctgtttgatgaggcactgcacagagacctagcaggcttccggatccagcaccagacttgatcctgctacagtacgtgg    |
| Mpmv8     | cctgtttgatgaggcactgcacagagacctagcaggcttccggatccagcaccagacttgatcctgctacagtacgtgg    |
| Mpmv9     | cctgtttgatgaggcactgcacagagacctagcaggcttccggatccagcaccagacttgatcctgctacagtacgtgg    |
| MPMV_CONS | ATGACTTACTGCTGGCCGCCACTTCTGAGCTCGACTGCCAACAAGGTACTCGGGCCCTGTTACAAACCTTAGGGGACCTC   |
| Mpmv1     | atgaTtactgctggccgccacttctgagctcgactgccacaaggtactcgggcctgttacaacccctaggggacctc      |
| Mpmv10    | -----                                                                              |
| Mpmv11    | atgacttactgctggccgccacttctgagctcgactgccacaaggtactcgggcctgttacaaccccttaggggacctc    |
| Mpmv12    | atgacttactgctggccgccacttctgagctcgactgccacaaggtactcgggcctgttacaacccctaggggacctc     |
| Mpmv13    | atgacttactgctggccgccacttctgagctcgactgccacaaggtactcgggcctgttacaacccctaggggacctc     |
| Mpmv2     | atgacttactgctggccgccacttctgagctcgactgccacaaggtactcgggcctgttacaacccctaggggacctc     |
| Mpmv3     | atgacttactgctggccgccacttctgagctcgactgccacaaggtactcgggcctgttacaacccctaggggacctc     |
| Mpmv4     | atgaTtactgctggccgccacttctgagctcgactgccacaaggtactcgggcctgttacaacccctaggggacctc      |
| Mpmv5     | atgacttactgctggccgccacttctgagctcgactgccacaaggtactcgggcctgttacaacccctaggggacctc     |
| Mpmv6     | atgacttactgctggccgccacttctgagctcgactgccacaaggtactcgggcctgttacaacccctaggggacctc     |
| Mpmv7     | atgacttactgctggccgccacttctgagctcgactgccacaaggtactcgggcctgttacaacccctaggggacctc     |
| Mpmv8     | atgaTtactgctggccgccacttctgagctcgactgccacaaggtactcgggcctgttacaacccctaggggacctc      |
| Mpmv9     | atgacttactgctggccgccacttctgagctcgactgccacaaggtactcgggcctgttacaacccctaggggacctc     |
| MPMV_CONS | GGGTATCGGGCCTCGGCCAAGAAAGCCCAAATTTGCCAGAAACAGGTCAAGTATCTGGGGTATCTTCTAAAAGAGGGTCA   |
| Mpmv1     | gggtatcgggcctcggccaagaaagcccaaatttgccagaaacaggtcaagtatctggggatctctctaaaagaggggtca  |
| Mpmv10    | -----                                                                              |
| Mpmv11    | gggtatcgggcctcggccaagaaagcccaaatttgccagaaacaggtcaagtatctggggatctctctaaaagaggggtca  |
| Mpmv12    | gggtatcgggcctcggccaagaaagcccaaatttgccagaaacaggtcaagtatctggggatctctctaaaagaggggtca  |
| Mpmv13    | gggtatcgggcctcggccaagaaagcccaaatttgccagaaacaggtcaagtatctggggatctctctaaaagaggggtca  |
| Mpmv2     | gggtatcgggcctcggccaagaaagcccaaatttgccagaaacaggtcaagtatctggggatctctctaaaagaggggtca  |
| Mpmv3     | gggtatcgggcctcggccaagaaagcccaaatttgccagaaacaggtcaagtatctggggatctctctaaaagaggggtca  |
| Mpmv4     | gggtatcgggcctcggccaagaaagcccaaatttgccagaaacaggtcaagtatctggggatctctctaaaagaggggtca  |
| Mpmv5     | gggtatcgggcctcggccaagaaagcccaaatttgccagaaacaggtcaagtatctggggatctctctaaaagaggggtca  |
| Mpmv6     | gggtatcgggcctcggccaagaaagcccaaatttgccagaaacaggtcaagtatctggggatctctCctaaaagaggggtca |
| Mpmv7     | gggtatcgggcctcggccaagaaagcccaaatttgccagaaacaggtcaagtatctggggatctctctaaaagaggggtca  |
| Mpmv8     | gggtatcgggcctcggccaagaaagcccaaatttgccagaaacaggtcaagtatctggggatctctctaaaagaggggtca  |
| Mpmv9     | gggtatcgggcctcggccaagaaagcccaaatttgccagaaacaggtcaagtatctggggatctctctaaaagaggggtca  |
| MPMV_CONS | GAGATGGCTGACTGAGGCCAGAAAAGAGACTGTGATGGGGCAGCCTATTCCGAAGACCCCTCGACAACCTAAGGGAGTTCC  |
| Mpmv1     | gagatggctgactgagggccagaaaagagactgtgatggggcagcctattccgaagacccctcgacaactaagggagtcc   |
| Mpmv10    | -----                                                                              |
| Mpmv11    | gagatggctgactgagggccagaaaagagactgtgatggggcagcctattccgaagacccctcgacaactaagggagtcc   |
| Mpmv12    | gagatggctgactgagggccagaaaagagactgtgatggggcagcctattccgaagacccctcgacaactaagggagtcc   |
| Mpmv13    | gagatggctgactgagggccagaaaagagactgtgatggggcagcctattccgaagacccctcgacaactaagggagtcc   |
| Mpmv2     | gagatggctgactgagggccagaaaagagactgtgatggggcagcctattccgaagacccctcgacaactaagggagtcc   |
| Mpmv3     | gagatggctgactgagggccagaaaagagactgtgatggggcagcctattccgaagacccctcgacaactaagggagtcc   |
| Mpmv4     | gagatggctgactgagggccagaaaagagactgtgatggggcagcctattccgaagacccctcgacaactaagggagtcc   |
| Mpmv5     | gagatggctgactgagggccagaaaagagactgtgatggggcagcctattccgaagacccctcgacaactaagggagtcc   |
| Mpmv6     | gagatggctgactgagggccagaaaagagactgtgatggggcagcctattccgaagacccctcgacaactaagggagtcc   |
| Mpmv7     | gagatggctgactgagggccagaaaagagactgtgatggggcTgcctattccgaagacccctcgacaactaagAaggttcc  |
| Mpmv8     | gagatggctgactgagggccagaaaagagactgtgatggggcagcctattccgaagacccctcgacaactaagggagtcc   |
| Mpmv9     | gagatggctgactgagggccagaaaagagactgtgatggggcagcctattccgaagacccctcgacaactaagggagtcc   |

|           |                                                                                    |
|-----------|------------------------------------------------------------------------------------|
| MPMV_CONS | TAGGGACGGCAGGCTTCTGTGCGCCTCTGGATCCCTGGGTTTGAGAAAATGGCAGCCCCCTTGACCTCTCACCAAAACG    |
| Mpmv1     | tagggacggcaggcttctgtcgccctctggatccctgggtttgcagaaatggcCgcccccttgtacctctcaccaaaacg   |
| Mpmv10    | -----                                                                              |
| Mpmv11    | tagggacggcaggcttctgtcgccctctggatccctgggtttgcagaaatggcagcccccttgtacctctcaccaaaacg   |
| Mpmv12    | tagggacggcaggcttctgtcgccctctggatccctgggtttgcagaaatggcagcccccttgtatTcctctcaccaaaacg |
| Mpmv13    | tagggacggcaggcttctgtcgccctctggatccctgggtttgcagaaatggcagcccccttgtacctctcaccaaaacg   |
| Mpmv2     | tagggacggcaggcttctgtcgccctctggatccctgggtttgcagaaatggcagcccccttgtatTcctctcaccaaaacg |
| Mpmv3     | tagggacggcaggcttctgtcgccctctggatccctgggtttgcagaaatggcagcccccttgtacctctcaccaaaacg   |
| Mpmv4     | tagggacggcaggcttctgtcgccctctggatccctgggtttgcagaaatggcCgcccccttgtacctctcaccaaaacg   |
| Mpmv5     | tagggacggcaggcttctgtcgccctctggatccctgggtttgcagaaatggcagcccccttgtacctctcaccaaaacg   |
| Mpmv6     | tagggacggcaggcttctgtcgccctctggatccctggAatttgcagaaatggcagcccccttgtacctctcaccaaaacg  |
| Mpmv7     | tagggacggcaggcttctgtcgccctctggatccctgggtttgcagaaatggcagcccccttgtacctctcaccaaaacg   |
| Mpmv8     | tagggacggcaggcttctgtcgccctctggatccctgggtttgcagaaatggcCgcccccttgtacctctcaccaaaacg   |
| Mpmv9     | tagggacggcaggcttctgtcgccctctggatccctgggtttgcagaaatggcagcccccttgtatTcctctcaccaaaacg |
| MPMV_CONS | GGGACTCTGTTTAATTGGGGCCCAGACCAGCAAAAGGCCTATCAAGAAATCAAACAGGCTCTTCTAACTGCCCCAGCCCT   |
| Mpmv1     | gggactctgttttaattggggcccagaccagcaaaaggcctatcaagaaatcaaacaggctcttctaaactgccccagccct |
| Mpmv10    | -----                                                                              |
| Mpmv11    | gggactctgttttaattggggcccagaccagcaaaaggcctatcaagaaatcaaacaggctcttctaaactgccccagccct |
| Mpmv12    | gggactctgttttaattggggcccagaccagcaaaaggcctatcaagaaatcaaacaggctcttctaaactgccccagccct |
| Mpmv13    | gggactctgttttaattggggcccagaccagcaaaaggcctatcaagaaatcaaacaggctcttctaaactgccccagccct |
| Mpmv2     | gggactctgttttaattggggcccagaccagcaaaaggcctatcaagaaatcaaacaggctcttctaaactgccccagccct |
| Mpmv3     | gggactctgttttaattggggcccagaccagcaaaaggcctatcaagaaatcaaacaggctcttctaaactgccccagccct |
| Mpmv4     | gggactctgttttaattggggcccagaccagcaaaaggcctatcaagaaatcaaacaggctcttctaaactgccccagccct |
| Mpmv5     | gggactctgttttaattggggcccagaccagcaaaaggcctatcaaAaatcaaacaggctcttctaaactgccccagccct  |
| Mpmv6     | gggactctgttttaattggggcccagaccagcaaaaggcctatcaagaaatcaaacaggctcttctaaactgccccagccct |
| Mpmv7     | gggactctgttttaattggggcccagaccagcaaaaggcctatcaagaaatcaaacaggctcttctaaactgccccagccct |
| Mpmv8     | gggactctgttttaattggggcccagaccagcaaaaggcctatcaagaaatcaaacaggctcttctaaactgccccagccct |
| Mpmv9     | gggactctgttttaattggggcccagaccagcaaaaggcctatcaagaaatcaaacaggctcttctaaactgccccagccct |
| MPMV_CONS | GGGGTTGCCAGATTGACTAAGCCCTTTGAACTCTTTGTCGACGAGAAGCAGGGCTACGCCAAAGGCGTCTTAACGCAAA    |
| Mpmv1     | ggggttgccagatttgactaagccctttgaactctttgtcgacgagaagcaggggtacgccaaggcgctctaacgcaaa    |
| Mpmv10    | -----                                                                              |
| Mpmv11    | ggggttgccagatttgactaagccctttgaactctttgtcgacgagaagcaggggtacgccaaggcgctctaacgcaaa    |
| Mpmv12    | ggggttgccagatttgactaagccctttgaactctttgtcgacgagaagcaggggtacgccaaggcgctctaacgcaaa    |
| Mpmv13    | ggggttgccagatttgactaagccctttgaactctttgtcgacgAaagcaggggtacgccaaggcgctctaacgcaaa     |
| Mpmv2     | ggggttgccagatttgactaagccctttgaactctttgtcgacgagaagcaggggtacgccaaggcgctctaacgcaaa    |
| Mpmv3     | ggggttgccagatttgactaagccctttgaactctttgtcgacgagaagcaggggtacgccaaggcgctctaacgcaaa    |
| Mpmv4     | ggggttgccagatttgactaagccctttgaactctttgtcgacgagaagcaggggtacgccaaggcgctctaacgcaaa    |
| Mpmv5     | gAAAttgccagatttgactaagccctttgaactctttgtcgacgagaagcaggggtacgccaaggcgctctaacgcaaa    |
| Mpmv6     | gggAAttgccagatttgactaagccctttgaactctttgtcgacgagaagcaggggtacgccaaggcgctctaacgcaaa   |
| Mpmv7     | ggggttgccagatttgactaagccctttgaactctttgtcgacgagaagcaggggtacgccaaggcgctctaacgcaaa    |
| Mpmv8     | ggggttgccagatttgactaagccctttgaactctttgtcgacgagaagcaggggtacgccaaggcgctctaacgcaaa    |
| Mpmv9     | ggggttgccagatttgactaagccctttgaactctttgtcgacgagaagcaggggtacgccaaggcgctctaacgcaaa    |
| MPMV_CONS | AACTGGGACCTTGCGCTCGGCCGGTGGCCTACCTGTCCAAAAAGCTAGACCCAGTGGCAGCTGGGTGGCCCCCTTGCCCTA  |
| Mpmv1     | aactgggaccttggcgctcgcccggtggcctacctgtccaaaaagctagaccagtggcagctgggtggcccccttgcccta  |
| Mpmv10    | -----                                                                              |
| Mpmv11    | aactgggaccttggcgctcgcccggtggcctacctgtccaaaaagctagaccagtggcagctgggtggcccccttgcccta  |
| Mpmv12    | aactgggaccttggcgctcgcccggtggcctacctgtccaaaaagctagaccagtggcagctgggtggcccccttgcccta  |
| Mpmv13    | aactgggaccttggcgctcgcccggtggcctacctgtccaaaaagctagaccagtggcagctgggtggcccccttgcccta  |
| Mpmv2     | aactgggaccttggcgctcgcccggtggcctacctgtccaaaaagctagaccagtggcagctgggtggcccccttgcccta  |
| Mpmv3     | aactgggaccttggcgctcgcccggtggcctacctgtccaaaaagctagaccagtggcagctgggtggcccccttgcccta  |
| Mpmv4     | aactgggaccttggcgctcgcccggtggcctacctgtccaaaaagctagaccagtggcagctgggtggcccccttgcccta  |
| Mpmv5     | aactgggaccttggcgctcgcccggtggcctacctgtccaaaaagctagaccagtggcagctgggtggcccccttgcccta  |
| Mpmv6     | aactgggaccttggcgctcgcccggtggcctacctgtccaaaaagctagaccagtggcagctgggtggcccccttgcccta  |
| Mpmv7     | aactgggaccttggcgctcgcccggtggcctacctgtccaaaaagctagaccagtggcagctgggtggcccccttgcccta  |
| Mpmv8     | aactgggaccttggcgctcgcccggtggcctacctgtccaaaaagctagaccagtggcagctgggtggcccccttgcccta  |
| Mpmv9     | aactgggaccttggcgctcgcccggtggcctacctgtccaaaaagctagaccagtggcagctgggtggcccccttgcccta  |

|           |                                                                                    |
|-----------|------------------------------------------------------------------------------------|
| MPMV_CONS | CGGATGGTAGCAGCCATTGCCGTTCTGACAAAGGATGCAGGCAAGCTAACTATGGGACAGCCGCTAGTCATTCTGGCCCC   |
| Mpmv1     | cggatggtagcagccattgccggttctgacaaaggatgcaggcaagctaactatgggacagccgctagtcattctggcccc  |
| Mpmv10    | -----                                                                              |
| Mpmv11    | cgaatggtagcagccattgccggttctgacaaaggatgcaggcaagctaactatgggacagccgctagtcattctggcccc  |
| Mpmv12    | cggatggtagcagccattgccggttctgacaaaggatgcaggcaagctaactatgggacagccgctagtcattctggcccc  |
| Mpmv13    | cggatggtagcagccattgccggttctgacaaaggatgcaggcaagctaactatgggacagccgctagtcattctggcccc  |
| Mpmv2     | cggatggtagcagccattgccggttctgacaaaggatgcaggcaagctaactatgggacagccgctagtcattctggcccc  |
| Mpmv3     | cggatggtagcagccattgccggttctgacaaaggatgcaggcaagctaactatgggacagccgctagtcattctggcccc  |
| Mpmv4     | cggatggtagcagccattgccggttctgacaaaggatgcaggcaagctaactatgggacagccgctagtcattctggcccc  |
| Mpmv5     | cggatggtagcagccattgccggttctgacaaaggatgcaggcaagctaactatgggacagccgctagtcattctggcccc  |
| Mpmv6     | cggatggtagcagccattgccggttctgacaaaggatgcaggcaagctaactatgggacagccgctagtcattctggcccc  |
| Mpmv7     | cggatggtagcagccattgccggttctgacaaaggatgcaggcaagctaactatgggacagccgctagtcattctggcccc  |
| Mpmv8     | cggatggtagcagccattgccggttctgacaaaggatgcaggcaagctaactatgggacagccgctagtcattctggcccc  |
| Mpmv9     | cggatggtagcagccattgccggttctgacaaaggatgcaggcaagctaactatgggacagccgctagtcattctggcccc  |
| MPMV_CONS | CCATGCGGTAGAAGCACTGGTCAAACAACCCCTGACCGCTGGCTATCCAATGCTCGCATGACCCACTATCAGGCAATGC    |
| Mpmv1     | ccatgcggtagaagcactgggtcaaaacaacccctgaccgctggctatccaatgctcgcatgacccactatcaggcaatgc  |
| Mpmv10    | -----                                                                              |
| Mpmv11    | ccatgcggtagaagcactgggtcaaaacaacccctgaccgctggctatccaatgctcgcatgacccactatcaggcaatgc  |
| Mpmv12    | ccatgcggtagaagcactgggtcaaaacaacccctgaccgctggctatccaatgctcgcatgacccactatcaggcaatgc  |
| Mpmv13    | ccatgcggtagaagcactgggtcaaaacaacccctgaccgctggctatccaatgctcgcatgacccactatcaggcaatgc  |
| Mpmv2     | ccatgcggtagaagcactgggtcaaaacaacccctgaccgctggctatccaatgctcgcatgacccactatcaggcaatgc  |
| Mpmv3     | ccatgcggtagaagcactgggtcaaaacaacccctgaccgctggctatccaatgctcgcatgacccactatcaggcaatgc  |
| Mpmv4     | ccatgcggtagaagcactgggtcaaaacaacccctgaccgctggctatccaatgctcgcatgacccactatcaggcaatgc  |
| Mpmv5     | ccatgcggtagaagcactgggtcaaaacaacccctgaccgctggctatccaatgctcgcatgacccactatcaggcaatgc  |
| Mpmv6     | ccatgcggtagaagcactgggtcaaaacaacccctgaccgctggctatccaatgctcgcatgacccactatcaggcaatgc  |
| Mpmv7     | ccatgcggtagaagcactgggtcaaaacaacccctgaccgctggctatccaatgctcgcatgacccactatcaggcaatgc  |
| Mpmv8     | ccatgcggtagaagcactgggtcaaaacaacccctgaccgctggctatccaatgctcgcatgacccactatcaggcaatgc  |
| Mpmv9     | ccatgcggtagaagcactgggtcaaaacaacccctgaccgctggctatccaatgctcgcatgacccactatcaggcaatgc  |
| MPMV_CONS | TCCTAGATACGGACCGAGTTCAAGTTCGGACCGGTGGTAGCCTTAAACCCGGCCACGTTGCTCCCCCTTGCCGGGAAAAGAG |
| Mpmv1     | tcctagatacggaccgagttcagttcggaccggtggttagccttaaacccgccacggtgctcccccttgccgggaaaagag  |
| Mpmv10    | -----                                                                              |
| Mpmv11    | atcggaccgagttcagttcggaccggtggttagccttaaacccgccacggtgctcccccttgccgggaaaagag         |
| Mpmv12    | tcctagatacggaccgagttcagttcggaccggtggttagccttaaacccgccacggtgctcccccttgccgggaaaagag  |
| Mpmv13    | tcctagatacggaccgagttcagttcggaccggtggttagccttaaacccgccacggtgctcccccttgccgggaaaagag  |
| Mpmv2     | tcctagatacggaccgagttcagttcggaccggtggttagccttaaacccgccacggtgctcccccttgccgggaaaagag  |
| Mpmv3     | tcctagatacggaccgagttcagttcggaccggtggttagccttaaacccgccacggtgctcccccttgccgggaaaagag  |
| Mpmv4     | tcctagatacggaccgagttcagttcggaccggtggttagccttaaacccgccacggtgctcccccttgccgggaaaagag  |
| Mpmv5     | tcctagatacggaccgagttcagttcggaccggtggttagccttaaacccgccacggtgctcccccttgccgggaaaagag  |
| Mpmv6     | tcctagatacggaccgagttcagttcggaccggtggttagccttaaacccgccacggtgctcccccttgccgggGaaagag  |
| Mpmv7     | tcctagatacggaccgagttcagttcggaccggtggttagccttaaacccgccacggtgctcccccttgccgggaaaagag  |
| Mpmv8     | tcctagatacggaccgagttcagttcggaccggtggttagccttaaacccgccacggtgctcccccttgccgggaaaagag  |
| Mpmv9     | tcctagatacggaccgagttcagttcggaccggtggttagccttaaacccgccacggtgctcccccttgccgggaaaagag  |
| MPMV_CONS | ACCCCCACGACTGCCTCGAGATCTTGGCTGAGACACACGGCACCAGACCGGACCTCACGGACGAGCCCCCTCCCAATGC    |
| Mpmv1     | acccccacgactgcctcgagatcttggctgagacacacggcaccagaccggacctcacggaccagccccctcccaaatgc   |
| Mpmv10    | acccccacgactgcctcgagatcttggctgagacacacggcaccagaccggacctcacggaccagccccctcccaaatgc   |
| Mpmv11    | acccccacgactgcctcgagatcttggctgagacacacggcaccagaccggacctcacggaccagccccctcccaaatgc   |
| Mpmv12    | acccccacgactgcctcgagatcttggctgagacacacggcaccagaccggacctcacggaccagccccctcccaaatgc   |
| Mpmv13    | acccccacgactgcctcgagatcttggctgagacacacggcaccagaccggacctcacggaccagccccctcccaaatgc   |
| Mpmv2     | acccccacgactgcctcgagatcttggctgagacacacggcaccagaccggacctcacggaccagccccctcccaaatgc   |
| Mpmv3     | acccccacgactgcctcgagatcttggctgagacacacggcaccagaccggacctcacggaccagccccctcccaaatgc   |
| Mpmv4     | acccccacgactgcctcgagatcttggctgagacacacggcaccagaccggacctcacggaccagccccctcccaaatgc   |
| Mpmv5     | acccccacgactgcctcgagatcttggctgagacacacggcaccagaccggacctcacggaccagccccctcccaaatgc   |
| Mpmv6     | acccccacgactgcctcgagatcttggctgagacacacggcaccagaccggacctcacggaccagccccctcccaaatgc   |
| Mpmv7     | acccccacgactgcctcgagatcttggctgagacacacggcaccagaccggacctcacggaccagccccctcccaaatgc   |
| Mpmv8     | acccccacgactgcctcgagatcttggctgagacacacggcaccagaccggacctcacggaccagccccctcccaaatgc   |
| Mpmv9     | acccccacgactgcctcgagatcttggctgagacacacggcaccagaccggacctcacggaccagccccctcccaaatgc   |

|           |                                                                                    |
|-----------|------------------------------------------------------------------------------------|
| MPMV_CONS | CGACCACACCTGGTATACAGATGGAAGCAGCTTCCTGCAGGAGGGGCAACGTAAGGCTGGAGCAGCGGTGACCACCGAGA   |
| Mpmv1     | cgaccacacctgggtatacagatggaagcagcttcctgcaggaggggcaacgtaaggctggagcagcggtgaccaccgaga  |
| Mpmv10    | cgaccacacctgggtatacagatggaagcagcttcctgcaggaggggcaacgtaaggctggagcagcggtgaccaccgaga  |
| Mpmv11    | cgaccacacctgggtatacagatggaagcagcttcctgcaggaggggcaacgtaaggctggagcagcggtgaccaccgaga  |
| Mpmv12    | cgaccacacctgggtatacagatggaagcagcttcctgcaggaggggcaacgtaaggctggagcagcggtgaccaccgaga  |
| Mpmv13    | cgaccacacctgggtatacagatggaagcagcttcctgcaggaggggcaacgtaaggctggagcagcggtgaccaccgaga  |
| Mpmv2     | cgaccacacctgggtatacagatggaagcagcttcctgcaggaggggcaacgtaaggctggagcagcggtgaccaccgaga  |
| Mpmv3     | cgaccacacctgggtatacagatggaagcagcttcctgcaggaggggcaacgtaaggctggagcagcggtgaccaccgaga  |
| Mpmv4     | cgaccacacctgggtatacagatggaagcagcttcctgcaggaggggcaacgtaaggctggagcagcggtgaccaccgaga  |
| Mpmv5     | cgaccacacctgggtatacagatggaagcagcttcctgcaggaggggcaacgtaaggctggagcagcggtgaccaccgaga  |
| Mpmv6     | cgaccacacctgggtatacagatggaagcagcttcctgcaggaggggcaacgtaaggctggagcagcggtgaccaccgaga  |
| Mpmv7     | cgaccacacctgggtatacagatggaagcagcttcctgcaggaggggcaacgtaaggctggagcagcggtgaccaccgaga  |
| Mpmv8     | cgaccacacctgggtatacagatggaagcagcttcctgcaggaggggcaacgtaaggctggagcagcggtgaccaccgaga  |
| Mpmv9     | cgaccacacctgggtatacagatggaagcagcttcctgcaggaggggcaacgtaaggctggagcagcggtgaccaccgaga  |
|           |                                                                                    |
| MPMV_CONS | CCGAGGTAATCTGGGCCAAGGCGTTGCCAGCCGGGACATCCGCCAGCGAGCTGAACTAATAGCACTCACCCAGGCCCTA    |
| Mpmv1     | cagaggtaatctgggccaaggcggttgcagtcgggacatccgccagcgagctgaactaatagcactcaccaggcccta     |
| Mpmv10    | cagaggtaatctgggccaaggcggttgcagtcgggacatccgccagcgagctgaactaatagcactcaccaggcccta     |
| Mpmv11    | cagaggtaatctgggccaaggcggttgcagtcgggacatccgccagcgagctgaactaatagcactcaccaggcccta     |
| Mpmv12    | cagaggtaatctgggccaaggcggttgcagtcgggacatccgccagcgagctgaactaatagcactcaccaggcccta     |
| Mpmv13    | cagaggtaatctgggccaaggcggttgcagtcgggacatccgccagcgagctgaactaatagcactcaccaggcccta     |
| Mpmv2     | cagaggtaatctgggccaaggcggttgcagtcgggacatccgccagcgagctgaactaatagcactcaccaggcccta     |
| Mpmv3     | cagaggtaatctgggccaaggcggttgcagtcgggacatccgccagcgagctgaactaatagcactcaccaggcccta     |
| Mpmv4     | cagaggtaatctgggccaaggcggttgcagtcgggacatccgccagcgagctgaactaatagcactcaccaggcccta     |
| Mpmv5     | cagaggtaatctgggccaaggcggttgcagtcgggacatccgccagcgagctgaactaatagcactcaccaggcccta     |
| Mpmv6     | cagaggtaatctgggccaaggcggttgcagtcgggacatccgccagcgagctgaactaatagcactcaccaggcccta     |
| Mpmv7     | cagaggtaatctgggccaaggcggttgcagtcgggacatccgccagcgagctgaactaatagcactcaccaggcccta     |
| Mpmv8     | cagaggtaatctgggccaaggcggttgcagtcgggacatccgccagcgagctgaactaatagcactcaccaggcccta     |
| Mpmv9     | cagaggtaatctgggccaaggcggttgcagtcgggacatccgccagcgagctgaactaatagcactcaccaggcccta     |
|           |                                                                                    |
| MPMV_CONS | AAGATGGCAGAAGGTAAGAAGCTAAATGTTTATACTGATAGCCGCTATGCCTTTGCTACCGCCCATGTCCATGGAGAAAT   |
| Mpmv1     | aagatggcagaaggttaagaagctaaatgtttatactgatagccgctatgcctttgctaccgcccattgtccatggagaaat |
| Mpmv10    | aagatggcagaaggttaagaagctaaatgtttatactgatagccgctatgcctttgctaccgcccattgtccatggagaaat |
| Mpmv11    | aagatggcagaaggttaagaagctaaatgtttatactgatagccgctatgcctttgctaccgcccattgtccatggagaaat |
| Mpmv12    | aagatggcagaaggttaagaagctaaatgtttatactgatagccgctatgcctttgctaccgcccattgtccatggagaaat |
| Mpmv13    | aagatggcagaaggttaagaagctaaatgtttatactgatagccgctatgcctttgctaccgcccattgtccatggagaaat |
| Mpmv2     | aagatggcagaaggttaaagctaaatgtttatactgatagccgctatgcctttgctaccgcccattgtccatggagaaat   |
| Mpmv3     | aagatggcagaaggttaagaagctaaatgtttatactgatagccgctatgcctttgctaccgcccattgtccatggagaaat |
| Mpmv4     | aagatggcagaaggttaagaagctaaatgtttatactgatagccgctatgcctttgctaccgcccattgtccatggagaaat |
| Mpmv5     | aagatggcagaaggttaagaagctaaatgtttatactgatagccgctatgcctttgctaccgcccattgtccatggagaaat |
| Mpmv6     | aagatggcagaaggttaagaagctaaatgtttatactgatagccgctatgcctttgctaccgcccattgtccatggagaaat |
| Mpmv7     | aagatggcagaaggttaagaagctaaatgtttatactgatagccgctatgcctttgctaccgcccattgtccatggagaaat |
| Mpmv8     | aagatggcagaaggttaagaagctaaatgtttatactgatagccgctatgcctttgctaccgcccattgtccatggagaaat |
| Mpmv9     | aagatggcagaaggttaagaagctaaatgtttatactgatagccgctatgcctttgctaccgcccattgtccatggagaaat |
|           |                                                                                    |
| MPMV_CONS | ATATAGGAGACGTGGGTGCTCACCTCAGAAGGCAAGGAGATCAAGAACAAGGGCGAAATCTTGCCCTTACTGAAAGCTC    |
| Mpmv1     | atataggagacgtgggttgctcacctcagaaggcaaggagatcaagaacaagggcgaaatcttggccttactgaaagctc   |
| Mpmv10    | atataggagacgtgggttgctcacctcagaaggcaaggagatcaagaacaagggcgaaatcttggccttactgaaagctc   |
| Mpmv11    | atataggagacgtgggttgctcacctcagaaggcaaggagatcaagaacaagggcgaaatcttggccttactgaaagctc   |
| Mpmv12    | atataggagacgtgggttgctcacctcagaaggcaaggagatcaagaacaagggcgaaatcttggccttactgaaagctc   |
| Mpmv13    | atataggagacgtgggttgctcacctcagaaggcaaggagatcaagaacaagggcgaaatcttggccttactgaaagctc   |
| Mpmv2     | atataggagacgtgggttgctcacctcagaaggcaaggagatcaagaacaagggcgaaatcttggccttactgaaagctc   |
| Mpmv3     | atataggagacgtgggttgctcacctcagaaggcaaggagatcaagaacaagggcgaaatcttggccttactgaaagctc   |
| Mpmv4     | atataggagacgtgggttgctcacctcagaaggcaaggagatcaagaacaagggcgaaatcttggccttactgaaagctc   |
| Mpmv5     | atataggagacgtgggttgctcacctcagaaggcaaggagatcaagaacaagggcgaaatcttggccttactgaaagctc   |
| Mpmv6     | atataggagacgtgggttgctcacctcagaaggcaaggagatcaagaacaagggcgaaatcttggccttactgaaagctc   |
| Mpmv7     | atataggagacgtgggttgctcacctcagaaggcaaggagatcaagaacaagggcgaaatcttggccttactgaaagctc   |
| Mpmv8     | atataggagacgtgggttgctcacctcagaaggcaaggagatcaagaacaagggcgaaatcttggccttactgaaagctc   |
| Mpmv9     | atataggagacgtgggttgctcacctcagaaggcaaggagatcaagaacaagggcgaaatcttggccttactgaaagctc   |

|           |                                                                                      |
|-----------|--------------------------------------------------------------------------------------|
| MPMV_CONS | TCTTTCTGCCCAAAAGACTCAGTATAATTCAGTCCAGGACATCAGAAAGGCAATAGTGCTGAAGCTAAAGGCAACCGA       |
| Mpmv1     | tctttctgccccaaaagactcagtataatctcactgcccaggacatcagaaaggcaatagtgtgctgaagctaaaggcaaccga |
| Mpmv10    | tctttctgccccaaaagactcagtataatctcactgcccaggacatcagaaaggcaatagtgtgctgaagctaaaggcaaccga |
| Mpmv11    | tctttctgccccaaaagactcagtataatctcactgcccaggacatcagaaaggcaatagtgtgctgaagctaaaggcaaccga |
| Mpmv12    | tctttctgccccaaaagactcagtataatctcactgcccaggacatcagaaaggcaatagtgtgctgaagctaaaggcaaccga |
| Mpmv13    | tctttctgccccaaaagactcagtataatctcactgcccaggacatcagaaaggcaatagtgtgctgaagctaaaggcaaccga |
| Mpmv2     | tctttctgccccaaaagactcagtataatctcactgcccaggacatcagaaaggcaatagtgtgctgaagctaaaggcaaccga |
| Mpmv3     | tctttctgccccaaaagactcagtataatctcactgcccaggacatcagaaaggcaatagtgtgctgaagctaaaggcaaccga |
| Mpmv4     | tctttctgccccaaaagactcagtataatctcactgcccaggacatcagaaaggcaatagtgtgctgaagctaaaggcaaccga |
| Mpmv5     | tctttctgccccaaaagactcagtataatctcactgcccaggacatcagaaaggcaatagtgtgctgaagctaaaggcaaccga |
| Mpmv6     | tctttctgccccaaaagactcagtataatctcactgcccaggacatcagaaaggcaatagtgtgctgaagctaaaggcaaccga |
| Mpmv7     | tctttctgccccaaaagactcagtataatctcactgcccaggacatcagaaaggcaatagtgtgctgaagctaaaggcaaccga |
| Mpmv8     | tctttctgccccaaaagactcagtataatctcactgcccaggacatcagaaaggcaatagtgtgctgaagctaaaggcaaccga |
| Mpmv9     | tctttctgccccaaaagactcagtataatctcactgcccaggacatcagaaaggcaatagtgtgctgaagctaaaggcaaccga |
|           |                                                                                      |
| MPMV_CONS | ATGGCGGACCAGGCAGCCCGGGAAGCAGCCATGGGGACTGACACAAAGGCCTCCTCACTTCTCATAGAGACCTCAACCCC     |
| Mpmv1     | atggcggaccaggcagccccgggaagcagccatggggactgacacaaaggcctcctcacttctcatagagacctcaacccc    |
| Mpmv10    | atggcggaccaggcagccccgggaagcagccatggggactgacacaaaggcctcctcacttctcatagagacctcaacccc    |
| Mpmv11    | atggcggaccaggcagccccgggaagcagccatggggactgacacaaaggcctcctcacttctcatagagacctcaacccc    |
| Mpmv12    | atggcggaccaggcagccccgggaagcagccatggggactgacacaaaggcctcctcacttctcatagagacctcaacccc    |
| Mpmv13    | atggcggaccaggcagccccgggaagcagccatggggactgacacaaaggcctcctcacttctcatagagacctcaacccc    |
| Mpmv2     | atggcggaccaggcagccccgggaagcagccatggggactgacacaaaggcctcctcacttctcatagagacctcaacccc    |
| Mpmv3     | atggcggaccaggcagccccgggaagcagccatggggactgacacaaaggcctcctcacttctcatagagacctcaacccc    |
| Mpmv4     | atggcggaccaggcagccccgggaagcagccatggggactgacacaaaggcctcctcacttctcatagagacctcaacccc    |
| Mpmv5     | atggcggaccaggcagccccgggaagcagccatggggactgacacaaaggcctcctcacttctcatagagacctcaacccc    |
| Mpmv6     | atggcggaccaggcagccccgggaagcagccatggggactgacacaaaggcctcctcacttctcatagagacctcaacccc    |
| Mpmv7     | atggcggaccaggcagccccgggaagcagccatggggactgacacaaaggcctcctcacttctcatagagacctcaacccc    |
| Mpmv8     | atggcggaccaggcagccccgggaagcagccatggggactgacacaaaggcctcctcacttctcatagagacctcaacccc    |
| Mpmv9     | atggcggaccaggcagccccgggaagcagccatggggactgacacaaaggcctcctcacttctcatagagacctcaacccc    |
|           |                                                                                      |
| MPMV_CONS | GTACTCTCCAGACTTCTTCCATTATACTGAAACAGATATAAAGAACCTACGAGAGTTGGGAGCCACATATGATAGAGAGA     |
| Mpmv1     | gtacactccagacttcttccattatactgaaacagatataaagaacctacgagagttgggagccacatatgatagagaga     |
| Mpmv10    | gtacactccagacttcttccattatactgaaacagatataaagaacctacgagagttgggagccacatatgatagagaga     |
| Mpmv11    | gtacactccagacttcttccattatactgaaacagatataaagaacctacgagagttgggagccacatatgatagagaga     |
| Mpmv12    | gtacactccagacttcttccattatactgaaacagatataaagaacctacgagagttgggagccacatatgatagagaga     |
| Mpmv13    | gtacactccagacttcttccattatactgaaacagatataaagaacctacgagagttgggagccacatatgatagagaga     |
| Mpmv2     | gtacactccagacttcttccattatactgaaacagatataaagaacctacgagagttgggagccacatatgatagagaga     |
| Mpmv3     | gtacactccagacttcttccattatactgaaacagatataaagaacctacgagagttgggagccacatatgatagagaga     |
| Mpmv4     | gtacactccagacttcttccattatactgaaacagatataaagaacctacgagagttgggagccacatatgatagagaga     |
| Mpmv5     | gtacactccagacttcttccattatactgaaacagatataaagaacctacgagagttgggagccacatatgatagagaga     |
| Mpmv6     | gtacactccagacttcttccattatactgaaacagatataaagaacctacgagagttgggagccacatatgatagagaga     |
| Mpmv7     | gtacactccagacttcttccattatactgaaacagatataaagaacctacgagagttgggagccacatatgatagagaga     |
| Mpmv8     | gtacactccagacttcttccattatactgaaacagatataaagaacctacgagagttgggagccacatatgatagagaga     |
| Mpmv9     | gtacactccagacttcttccattatactgaaacagatataaagaacctacgagagttgggagccacatatgatagagaga     |
|           |                                                                                      |
| MPMV_CONS | AAAAATATTGGGTCCTGCAAGGTAAACCTGTGATGCCTGACCAGTTACCTTTGAATTATTAGACTTCCTTCACCAGCTC      |
| Mpmv1     | aaaaatattgggtcctgcaaggtaaacctgtgatgcctgaccagttcacctttgaattattagacttccttcaccagctc     |
| Mpmv10    | aaaaatattgggtcctgcaaggCaaacctgtgatgcctgaccagttcacctttgaattattagacttccttcaccagctc     |
| Mpmv11    | aaaaatattgggtcctgcaaggtaaacctgtgatgcctgaccagttcacctttgaattattagacttccttcaccagctc     |
| Mpmv12    | aaaaatattgggtcctgcaaggtaaacctgtgatgcctgaccagttcacctttgaattattagacttccttcaccagctc     |
| Mpmv13    | aaaaatattgggtcctgcaaggtaaacctgtgatgcctgaccagttcacctttgaattattagacttccttcaccagctc     |
| Mpmv2     | aaaaatattgggtcctgcaaggtaaacctgtgatgcctgaccagttcacctttgaattattagacttccttcaccagctc     |
| Mpmv3     | aaaaatattgggtcctgcaaggtaaacctgtgatgcctgaccagttcacctttgaattattagacttccttcaccagctc     |
| Mpmv4     | aaaaatattgggtcctgcaaggtaaacctgtgatgcctgaccagttcacctttgaattattagacttccttcaccagctc     |
| Mpmv5     | aaaaatattgggtcctgcaaggtaaacctgtgatgcctgaccagttcacctttgaattattagacttccttcaccagctc     |
| Mpmv6     | aaaaatattgggtcctgcaaggtaaacctgtgatgcctgaccagttcacctttgaattattagacttccttcaccagctc     |
| Mpmv7     | aaaaatattgggtcctgcaaggtaaacctgtgatgcctgaccagttcacctttgaattattagacttccttcaccagctc     |
| Mpmv8     | aaaaatattgggtcctgcaaggtaaacctgtgatgcctgaccagttcacctttgaattattagacttccttcaccagctc     |
| Mpmv9     | aaaaatattgggtcctgcaaggtaaacctgtgatgcctgaccagttcacctttgaattattagacttccttcaccagctc     |

|           |                                                                                     |
|-----------|-------------------------------------------------------------------------------------|
| MPMV_CONS | ACCCACCTTAGCTATCAGAAGATGAGGGCACTTCTAGACAGAAAAGAAAGCCCCCTATTACATGCTAAATAAAGATAAGAT   |
| Mpmv1     | accacaccttagctatcagaagatgaggggcacttctagacagaaaaagaaagcccTtattacatgctaaataaagataagat |
| Mpmv10    | accacaccttagctatcagaagatgaggggcacttctagacAaaaaagaaagcccctattacatgctaaataaaAataagat  |
| Mpmv11    | accacaccttagctatcagaagatgaggggcacttctagacagaaaaagaaagcccTtattacatgctaaataaagataagat |
| Mpmv12    | accacaccttagctatcagaagatgaggggcacttctagacagaaaaagaaagcccctattacatgctaaataaagataagat |
| Mpmv13    | accacaccttagctatcagaagatgaggggcacttctagacagaaaaagaaagcccctattacatgctaaataaagataagat |
| Mpmv2     | accacaccttagctatcagaagatgaggggcacttctagacagaaaaagaaagcccctattacatgctaaataaagataagat |
| Mpmv3     | accacaccttagctatcagaagatgaggggcacttctagacagaaaaagaaagcccctattacatgctaaataaagataagat |
| Mpmv4     | accacaccttagctatcagaagatgaggggcacttctagacagaaaaagaaagcccctattacatgctaaataaagataagat |
| Mpmv5     | accacaccttagctatcagaagatAggggcacttctagacagaaaaagaaagcccctattacatgctaaataaagataagat  |
| Mpmv6     | accacaccttagctatcagaagatgaggggcacttctagacagaaaaagaaagcccctattacatgctaaataaagataagat |
| Mpmv7     | accacaccttagctatcagaagatgaggggcacttctagacagaaaaagaaagcccctattacatgctaaataaagataagat |
| Mpmv8     | accacaccttagctatcagaagatgaggggcacttctagacagaaaaagaaagcccctattacatgctaaataaagataagat |
| Mpmv9     | accacaccttagctatcagaagatgaggggcacttctagacagaaaaagaaagcccctattacatgctaaataaagataagat |
|           |                                                                                     |
| MPMV_CONS | CCTCCACGAGGTGGCGGAATCATGCCAAGCCTGTGTCCAAGTAAATGCCAGTAAAGCTAAGGTCGGTCCCGGGGTGCGAG    |
| Mpmv1     | cctccacgaggtggcggaatcatgccaagcctgtgtccaagtaaatgccagtaaaagctaaggtcggtcccgggggtgcgag  |
| Mpmv10    | cctccacgaggtggcggaatcatgccaagcctgtgtccaagtaaatgccagtaaaagctaaggtcggtcccgggggtgcgag  |
| Mpmv11    | cctccacgaggtggcggaatcatgccaagcctgtgtccaagtaaatgccagtaaaagctaaggtcggtcccgggggtgcgag  |
| Mpmv12    | cctccacgaggtggcggaatcatgccaagcctgtgtccaagtaaatgccagtaaaagctaaggtcggtcccgggggtgcgag  |
| Mpmv13    | cctccacgaggtggcggaatcatgccaagcctgtgtccaagtaaatgccagtaaaagctaaggtcggtcccgggggtgcgag  |
| Mpmv2     | cctccacgaggtggcggaatcatgccaagcctgtgtccaagtaaatgccagtaaaagctaaggtcggtcccgggggtgcgag  |
| Mpmv3     | cctccacgaggtggcggaatcatgccaagcctgtgtccaagtaaatgccagtaaaagctaaggtcggtcccgggggtgcgag  |
| Mpmv4     | cctccacgaggtggcggaatcatgccaagcctgtgtccaagtaaatgccagtaaaagctaaggtcggtcccgggggtgcgag  |
| Mpmv5     | cctccacgaggtggcggaatcatgccaagcctgtgtccaagtaaatgccagtaaaagctaaggtcggtcccgggggtgcgag  |
| Mpmv6     | cctccacgaggtggcggaatcatgccaagcctgtgtccaagtaaatgccagtaaaagctaaggtcggtcccgggggtgcgag  |
| Mpmv7     | cctccacgaggtggcggaatcatgccaagcctgtgtccaagtaaatgccagtaaaagctaaggtcggtcccgggggtgcgag  |
| Mpmv8     | cctccacgaggtggcggaatcatgccaagcctgtgtccaagtaaatgccagtaaaagctaaggtcggtcccgggggtgcgag  |
| Mpmv9     | cctccacgaggtggcggaatcatgccaagcctgtgtccaagtaaatgccagtaaaagctaaggtcggtcccgggggtgcgag  |
|           |                                                                                     |
| MPMV_CONS | TAAGAGGACATCGACCAGGCACCCATTGGGAAATTGACTTTACTGAAGTAAGGCCCGGACTGTATGGGCATAAGTATCTT    |
| Mpmv1     | taagaggacatcgaccaggcacccattgggaaattgactttactgaagtaaggcccggaactgtatgggcataagtatctt   |
| Mpmv10    | taagaggacatcgaccaggcacccattgggaaattgactttactgaagtaaggcccggaactgtatgggcataagtatctt   |
| Mpmv11    | taagaggacatcgaccaggcacccattgggaaattgactttactgaagtaaggcccggaactgtatgggcataagtatctt   |
| Mpmv12    | taagaggacatcgaccaggcacccattgggaaattgactttactgaagtaaggcccggaactgtatgggcataagtatctt   |
| Mpmv13    | taagaggacatcgaccaggcacccattgggaaattgactttactgaagtaaggcccggaactgtatgggcataagtatctt   |
| Mpmv2     | taagaggacatcgaccaggcacccattgggaaattgactttactgaagtaaggcccggaactgtatgggcataagtatctt   |
| Mpmv3     | taagaggacatcgaccaggcacccattgggaaattgactttactgaagtaaggcccggaactgtatgggcataagtatctt   |
| Mpmv4     | taagaggacatcgaccaggcacccattgggaaattgactttactgaagtaaggcccggaactgtatgggcataagtatctt   |
| Mpmv5     | taagaggacatcgaccaggcacccattgAgaattgactttactgaagtaaggcccggaactgtatgggTataagtatctt    |
| Mpmv6     | taagaggacatcgaccaggcacccattgggaaattgactttactgaagtaaggcccggaactgtatgggTataagtatctt   |
| Mpmv7     | taagaggacatcgaccaggcacccattgggaaattgactttactgaagtaaggcccggaactgtatgggcataagtatctt   |
| Mpmv8     | taagaggacatcgaccaggcacccattgggaaattgactttactgaagtaaggcccggaactgtatgggcataagtatctt   |
| Mpmv9     | taagaggacatcgaccaggcacccattgggaaattgactttactgaagtaaggcccggaactgtatgggcataagtatctt   |
|           |                                                                                     |
| MPMV_CONS | CTGGTGTGTTGTGGACACGTTCTCTGGCTGGGTGGAAGCCTTCCCAACCAAGCATGAGACTGCCAAAGTTGTGACCAAAAA   |
| Mpmv1     | ctgggtgtttgtggacacggttctctggctgggtggaagccttcccaaccaagcatgagactgccaaagtgtgaccaaaaa   |
| Mpmv10    | ctgggtgtttgtggacacggttctctggctgggtggaagccttcccaaccaagcatgagaTtgccaaagtgtgaccaaaaa   |
| Mpmv11    | ctgggtgtttgtggacacggttctctggctgggtggaAaccttcccaaccaagcatgagactgccaaagtgtgaccaaaaa   |
| Mpmv12    | ctgggtgtttgtggacacggttctctggctgggtggaagccttcccaaccaagcatgagactgccaaagtgtgaccaaaaa   |
| Mpmv13    | ctgggtgtttgtggacacggttctctggctgggtggaagccttcccaaccaagcatgagactgccaaagtgtgaccaaaaa   |
| Mpmv2     | ctgggtgtttgtggacacggttctctggctgggtggaagccttcccaaccaagcatgagactgccaaagtgtgaccaaaaa   |
| Mpmv3     | ctgggtgtttgtggacacggttctctggctgggtggaagccttcccaaccaagcatgagactgccaaagtgtgaccaaaaa   |
| Mpmv4     | ctgggtgtttgtggacacggttctctggctgggtggaagccttcccaaccaagcatgagactgccaaagtgtgaccaaaaa   |
| Mpmv5     | ctgggtgtttgtggacacggttctctggctgggtggaagccttcccaaccaagcatgagactgccaaagtgtgaccaaaaa   |
| Mpmv6     | ctgggtgtttgtggacacggttctctggctgggtggaagccttcccaaccaagcatgagactgccaaagtgtgaccaaaaa   |
| Mpmv7     | ctgggtgtttgtggacacggttctctggctgggtggaagccttcccaaccaagcatgagactgccaaagtgtgaccaaaaa   |
| Mpmv8     | ctgggtgtttgtggacacggttctctggctgggtggaagccttcccaaccaagcatgagactgccaaagtgtgaccaaaaa   |
| Mpmv9     | ctgggtgtttgtggacacggttctctggctgggtggaagccttcccaaccaagcatgagactgccaaagtgtgaccaaaaa   |

|           |                                                                                   |
|-----------|-----------------------------------------------------------------------------------|
| MPMV_CONS | GCTTCTAGAAGAAATATTTCCAAGGTTTGGAAATGCCCAAGTATTGGGGACTGATAATGGGCCTGCCTTCGTCTCCAGG   |
| Mpmv1     | gcttctagaagaaatatttccaaggtttggaatgccccaaagtattggggactgataatgggcctgccttcgtctcccagg |
| Mpmv10    | gcttctagaagaaatatttccaaggtttggaatgccccaaagtattggggactgataatgggcctgccttcgtctcccagg |
| Mpmv11    | gcttctagaagaaatatttccaaggtttggaatgccccaaagtattggggactgataatgggcctgccttcgtctcccagg |
| Mpmv12    | gcttctagaagaaatatttccaaggtttggaatgccccaaagtattggggactgataatgggcctgccttcgtctcccagg |
| Mpmv13    | gcttctagaagaaatatttccaaggtttAgaatgccccaaagtattggggactgataatgggcctgccttcgtctcccagg |
| Mpmv2     | gcttctagaagaaatatttccaaggtttggaatgccccaaagtattggggactgataatgggcctgccttcgtctcccagg |
| Mpmv3     | gcttctagaagaaatatttccaaggtttggaatgccccaaagtattggggactgataatgggcctgccttcgtctcccagg |
| Mpmv4     | gcttctagaagaaatatttccaaggtttggaatgccccaaagtattggggactgataatgggcctgccttcgtctcccagg |
| Mpmv5     | gcttctagaaAaaatatttccaaggtttggaatgccccaaagtattggggactgataatgggcctgccttcgtctcccagg |
| Mpmv6     | gcttctagaagaaatatttccaaggtttggaatgccccaaagtattggggactgataatgggcctgccttcgtctcccagg |
| Mpmv7     | gcttctagaagaaatatttccaaggtttggaatgccccaaagtattggggactgataatgggcctgccttcgtctcccagg |
| Mpmv8     | gcttctagaagaaatatttccaaggtttggaatgccccaaagtattggggactgataatgggcctgccttcgtctcccagg |
| Mpmv9     | gcttctagaagaaatatttccaaggtttggaatgccccaaagtattggggactgataatgggcctgccttcgtctcccagg |
|           |                                                                                   |
| MPMV_CONS | TAAGTCAGTCGGTGGCCAAGCTACTGGGGATTGATTGGAACTACATTGTGCTTACAGACCCAGAGTTCAGGTCAGGTA    |
| Mpmv1     | taagtcagtcggtggccaagctactggggattgattggaaactacatttgtgcttacagacccagagttcaggtcaggta  |
| Mpmv10    | taagtcagtcggtggccaagctactggggattgattAgaactacatttgtgcttacagacccagagttcaggtcaggta   |
| Mpmv11    | taagtcagtcggtggccaagctactggggattgattggaaactacatttgtgcttacagacccagagttcaggtcaggta  |
| Mpmv12    | taagtcagtcggtggccaagctactggggattgattggaaactacatttgtgcttacagacccagagttcaggtcaggta  |
| Mpmv13    | taagtcagtcggtggccaagctactggggattgattggaaactacatttgtgcttacagacccagagttcaggtcaggta  |
| Mpmv2     | taagtcagtcggtggccaagctactggggattgattggaaactacatttgtgcttacagacccagagttcaggtcaggta  |
| Mpmv3     | taagtcagtcggtggccaagctactggggattgattggaaactacatttgtgcttacagacccagagttcaggtcaggta  |
| Mpmv4     | taagtcagtcggtggccaagctactggggattgattggaaactacatttgtgcttacagacccagagttcaggtcaggta  |
| Mpmv5     | taagtcagtcggtggccaagctactggggattAattAAaaactacatttgtgcttacagacccagagttcaggtcaggta  |
| Mpmv6     | taagtcagtcggtggccaagctactggggattgattggaaactacatttgtgcttacagacccagagttcaggtcaggta  |
| Mpmv7     | taagtcagtcggtggccaagctactggggattgattggaaactacatttgtgcttacagacccagagttcaggtcaggta  |
| Mpmv8     | taagtcagtcggtggccaagctactggggattgattggaaactacatttgtgcttacagacccagagttcaggtcaggta  |
| Mpmv9     | taagtcagtcggtggccaagctactggggattgattggaaactacatttgtgcttacagacccagagttcaggtcaggta  |
|           |                                                                                   |
| MPMV_CONS | GAAAGAAATGAATAGGACAATCAAGGAGACTTTGACCAAATTAACGCTTGCAACTGGCACTAGAGACTGGGTACTCCTACT |
| Mpmv1     | gaaagaatgaataggacaatcaaggagactttgaccaaattaacgcttgcaactggcactagagactgggtactcctact  |
| Mpmv10    | AAaagaatgaataggacaatcaaggagactttgaccaaattaacgcttgcaactggcactagagactgggtactcctact  |
| Mpmv11    | gaaagaatgaataggacaatcaaggagactttgaccaaattaacgcttgcaactggcactagagactgggtactcctact  |
| Mpmv12    | gaaagaatgaataggacaatcaaggagactttgaccaaattaacgcttgcaactggcactagagactgggtactcctact  |
| Mpmv13    | gaaagaatgaataggacaatcaaggagactttgaccaaattaacgcttgcaactggcactagagactgggtactcctact  |
| Mpmv2     | gaaagaatgaataggacaatcaaggagactttgaccaaattaacgcttgcaactggcactagagactgggtactcctact  |
| Mpmv3     | gaaagaatgaataggacaatcaaggagactttgaccaaattaacgcttgcaactggcactagagactgggtactcctact  |
| Mpmv4     | gaaagaatgaataggacaatcaaggagactttgacTaaataaacttgcaactggcactagagactgggtactcctact    |
| Mpmv5     | AAaagaatgaataAgacaatcaaggagactttgaccaaattaacgcttgcaactggcactagagactgggtactcctact  |
| Mpmv6     | gaaagaatgaataggacaatcaaggagactttgaccaaattaacgcttgcaactggcactagagactgggtactcctact  |
| Mpmv7     | gaaagaatAaataggacaatcaaggagactttgaccaaattaacgcttgcaactggcactagagactgggtactcctact  |
| Mpmv8     | AAaagaatgaataggacaatcaaggagactttgacTaaataaacttgcaactggcactagagactgggtactcctact    |
| Mpmv9     | AAaagaatgaataggacaatcaaggagactttgaccaaattaacgcttgcaactggcactagagactgggtactcctact  |
|           |                                                                                   |
| MPMV_CONS | TCCCTTGGCCCTCTACCGAGCCCGCAACACTCCGGGCCCCCATGGACTCACTCCGTATGAAATCCTGTATGGGGCGCCCC  |
| Mpmv1     | tcccttggccctctaccgagcccgcaacactccgggcccccatggactcactccgtatgaaatcctgtatggggcgcccc  |
| Mpmv10    | tcccttggccctctaccgagcccgcaacactccgggcccccatggactcactccgtatgaaatcctgtatggggcgcccc  |
| Mpmv11    | tcccttggccctctaccgagcccgcaacactccgggcccccatggactcactccgtatgaaatcctgtatggggcgcccc  |
| Mpmv12    | tcccttggccctctaccgagcccgcaacactccgggcccccatggactcactccgtatgaaatcctgtatggggcgcccc  |
| Mpmv13    | tcccttggccctctaccgagcccgcaacactccgggcccccatggactcactccgtatgaaatcctgtatggggcgcccc  |
| Mpmv2     | tcccttggccctctaccgagcccgcaacactccgggcccccatggactcactccgtatgaaatcctgtatggggcgcccc  |
| Mpmv3     | tcccttggccctctaccgagcccgcaacactccgggcccccatggactcactccgtatgaaatcctgtatggggcgcccc  |
| Mpmv4     | tcccttggccctctaccgagcccgcaacactccgggcccccatggactcactccgtatgaaatcctgtatggggcgcccc  |
| Mpmv5     | tcccttggccctctaccgagcccgcaacactccgggcccccatggactcactccgtatAaaatcctgtatggggcgcccc  |
| Mpmv6     | tcccttggccctctaccgagcccgcaacactccgggcccccatggactcactccgtatgaaatcctgtatggggcgcccAc |
| Mpmv7     | tcccttggccctctaccgagcccgcaacactccgggcccccatggactcactccgtatgaaatcctgtatggggcgcccc  |
| Mpmv8     | tcccttggccctctaccgagcccgcaacactccgggcccccatggactcactccgtatgaaatcctgtatggggcgcccc  |
| Mpmv9     | tcccttggccctctaccgagcccgcaacactccgggcccccatggactcactccgtatgaaatcctgtatggggcgcccc  |

|           |                                                                                    |
|-----------|------------------------------------------------------------------------------------|
| MPMV_CONS | CGCCCCCTTGTTAATTTCCATGATCCTGAAATGTCAAAGTTTACTAATAGCCCCCTCTCTCCAAGCTCACTTACAGGCCCTC |
| Mpmv1     | cgcccccttgTTAATTTCCATGATCCTGAAATGTCAAAGTTTACTAATAGCCCCCTCTCTCCAAGCTCACTTACAGGCCCTC |
| Mpmv10    | cgcccccttgTTAATTTCCATGATCCTGAAATGTCAAAGTTTACTAATAGCCCCCTCTCTCCAAGCTCACTTACAGGCCCTC |
| Mpmv11    | cgcccccttgTTAATTTCCATGATCCTGAAATGTCAAAGTTTACTAATAGCCCCCTCTCTCCAAGCTCACTTACAGGCCCTC |
| Mpmv12    | cgcccccttgTTAATTTCCATGATCCTGAAATGTCAAAGTTTACTAATAGCCCCCTCTCTCCAAGCTCACTTACAGGCCCTC |
| Mpmv13    | cgcccccttgTTAATTTCCATGATCCTGAAATGTCAAAGTTTACTAATAGCCCCCTCTCTCCAAGCTCACTTACAGGCCCTC |
| Mpmv2     | cgcccccttgTTAATTTCCATGATCCTGAAATGTCAAAGTTTACTAATAGCCCCCTCTCTCCAAGCTCACTTACAGGCCCTC |
| Mpmv3     | cgcccccttgTTAATTTCCATGATCCTGAAATGTCAAAGTTTACTAATAGCCCCCTCTCTCCAAGCTCACTTACAGGCCCTC |
| Mpmv4     | cgcccccttgTTAATTTCCATGATCCTGAAATGTCAAAGTTTACTAATAGCCCCCTCTCTCCAAGCTCACTTACAGGCCCTC |
| Mpmv5     | cgcccccttgTTAATTTCCATGATCCTGAAATGTCAAAGTTTACTAATAGCCCCCTCTCTCCAAGCTCACTTACAGGCCCTC |
| Mpmv6     | cgcccccttgTTAATTTCCATGATCCTGAAATGTCAAAGTTTACTAATAGCCCCCTCTCTCCAAGCTCACTTACAGGCCCTC |
| Mpmv7     | cgcccccttgTTAATTTCCATGATCCTGAAATGTCAAAGTTTACTAATAGCCCCCTCTCTCCAAGCTCACTTACAGGCCCTC |
| Mpmv8     | cgcccccttgTTAATTTCCATGATCCTGAAATGTCAAAGTTTACTAATAGCCCCCTCTCTCCAAGCTCACTTACAGGCCCTC |
| Mpmv9     | cgcccccttgTTAATTTCCATGATCCTGAAATGTCAAAGTTTACTAATAGCCCCCTCTCTCCAAGCTCACTTACAGGCCCTC |
|           |                                                                                    |
| MPMV_CONS | CAAGCAGTACAACGAGAGGCTCTGGAAGCCTCTGGCCGCTGCCTATCAGGACCAACAAGACCAGCCTGTGATACCACACCC  |
| Mpmv1     | caagcagtacaacgagaggtctggaagcctctggccgctgcctatcaggaccaacaagaccagcctgtgataccacaccc   |
| Mpmv10    | caagcagtacaacAagaggtctggaagccGctggccgctgcctatcaggaccaacaagaccagcctgtgataccacaccc   |
| Mpmv11    | caagcagtacaacgagaggtctggaagcctctggccgctgcctatcaggaccaacaagaccagcctgtgataccacaccc   |
| Mpmv12    | caagcGgtacaacgagaggtctggaagcctctggccgctgcctatcaggaccaacaagaccagcctgtgataccacaccc   |
| Mpmv13    | caagcagtacaacgagaggtctggaagcctctggccgctgcctatcaggaccaacaagaccagcctgtgataccacaccc   |
| Mpmv2     | caagcGgtacaacgagaggtctggaagcctctggccgctgcctatcaggaccaacaagaccagcctgtgataccacaccc   |
| Mpmv3     | caagcagtacaacgagaggtctggaagcctctggccgctgcctatcaggaccaacaagaccagcctgtgAataccacaccc  |
| Mpmv4     | caagcagtacaacgagaggtctggaagcctctggccgctgcctatcaggaccaacaagaccagcctgtgataccacaccc   |
| Mpmv5     | caagcagtacaacgagaggtctggaagcctctggccgctgcctatcaggaccaacaagaccagcctgtgataccacaccc   |
| Mpmv6     | caagcagtacaacgagaggtctggaagcctctggccgctgcctatcaggaccaacaagaccagcctgtgataccacaccc   |
| Mpmv7     | caagcagtacaacgagaggtctggaagcctctggccgctgcctatcaggaccaacaagaccagcctgtgataccacaccc   |
| Mpmv8     | caagcagtacaacgagaggtctgAaagcctctggccgctgcctatcaggaccaacaagaccagcctgtgataccacaccc   |
| Mpmv9     | caagcGgtacaacgagaggtctggaagcctctggccgctgcctatcaggaccaacaagaccagcctgtgataccacaccc   |
|           |                                                                                    |
| MPMV_CONS | CTTCCGTGTGCGGCGACACCGTGTGGGTACGCCGGCACCAGACTAAGAACTTGGAACTTCGCTGGAAAGGACCCCTACACCG |
| Mpmv1     | cttccgtgtcggcgacacccgtgtgggtacgccggcaccagactaagaacttggaacctcgctggaaggaccctacacccg  |
| Mpmv10    | cttccgtgtcggcgacacccgtgtgggtacgccggcaccagactaagaacttggaacctcgctggaaggaccctacacccg  |
| Mpmv11    | cttccgtgtcggcgacacccgtgtgggtacgccggcaccagactaagaacttggaacctcgctggaaggaccctacacccg  |
| Mpmv12    | cttccgtgtcggcgacacccgtgtgggtacgccggcaccagactaagaacttggaacctcgctggaaggaccctacacccg  |
| Mpmv13    | cttccgtgtcggcgacacccgtgtgggtacgccggcaccagactaagaacttggaacctcgctgAaaaggaccctacacccg |
| Mpmv2     | cttccgtgtcggcgacacccgtgtgggtacgccggcaccagactaagaacttggaacctcgctggaaggaccctacacccg  |
| Mpmv3     | cttccgtgtcggcgacacccgtgtgggtacgccggcaccagactaagaacttggaacctcgctggaaggaccctacacccg  |
| Mpmv4     | cttccgtgtcggcgacacccgtgtgggtacgccggcaccagactaagaacttggaacctcgctggaaggaccctacacccg  |
| Mpmv5     | cttccgtgtcggcgacacccgtgtgggtacgccggcaccagactaagaacttgAaacctcgctggaaggaccctacacccg  |
| Mpmv6     | cttccgtgtcggcgacacccgtgtgggtacgccggcaccagactaagaacttggaacctcgctggaaggaccctacacccg  |
| Mpmv7     | cttccgtgtcggcgacacccgtgtgggtacgccggcaccagactaagaacttggaacctcgctggaaggaccctacacccg  |
| Mpmv8     | cttccgtgtcggcgacacccgtgtgggtacgccggcaccagactaagaacttggaacctcgctggaaggaccctacacccg  |
| Mpmv9     | cttccgtgtcggcgacacccgtgtgggtacgccggcaccagactaagaacttggaacctcgctggaaggaccctacacccg  |
|           |                                                                                    |
| MPMV_CONS | TCCTGCTGACCACCCCCACCGCTCTCAAAGTAGACGGCATCGCTGCGTGGATCCACGCCGCTCACGTA AAAAGCGGCGACA |
| Mpmv1     | tccctgctgaccacccccaccgctctcaaagtagacggcatcgctgctggatccacgccgctcacgtaaaagcggcgaca   |
| Mpmv10    | tccctgctgaccacccccaccgctctcaaagtagacggcatcgctgctggatccacgccgctcacgtaaaagcggcgaca   |
| Mpmv11    | tccctgctgaccacccccaccgctctcaaagtagacggcatcgctgctggatccacgccgctcacgtaaaagcggcgaca   |
| Mpmv12    | tccctgctgaccacccccaccgctctcaaagtagacggcatcgctgctggatccacgccgctcacgtaaaagcggcgaca   |
| Mpmv13    | tccctgctgaccacccccaccgctctcaaagtagacggcatcgctgctggatccacgccgctcacgtaaaagcggcgaca   |
| Mpmv2     | tccctgctgaccacccccaccgctctcaaagtagacggcatcgctgctggatccacgccgctcacgtaaaagcggcgaca   |
| Mpmv3     | tccctgctgaccacccccaccgctctcaaagtagacggcatcgctgctggatccacgccgctcacgtaaaagcggcgaca   |
| Mpmv4     | tccctgctgaccacccccaccgctctcaaagtagacggcatcgctgctggatccacgccgctcacgtaaaagcggcgaca   |
| Mpmv5     | tccctgctgaccacTcccaccgctctcaaagtagacggcatcgctgctggatccacgccgctcacgtaaaagcggcgaca   |
| Mpmv6     | tccctgctgaccacccccaccgctctcaaagtagacggcatcgctgctggatccacgccgctcacgtaaaagcggcgaca   |
| Mpmv7     | tccctgctgaccacccccaccgctctcaaagtagacggcatcgctgctggatccacgccgctcacgtaaaagcggcgaca   |
| Mpmv8     | tccctgctgaccacccccaccgctctcaaagtagacggcatcgctgctggatccacgccgctcacgtaaaagcggcgaca   |
| Mpmv9     | tccctgctgaccacccccaccgctctcaaagtagacggcatcgctgctggatccacgccgctcacgtaaaagcggcgaca   |

|           |                                                                                  |
|-----------|----------------------------------------------------------------------------------|
| MPMV_CONS | ACCCCTCCGGCCGGAACAGCATCAGGACCGACATGGAAGGTCCAGCGTTCTCAAAACCCCTTAAAGATAAGATTAACCCG |
| Mpmv1     | acccctccggccggaacagcatcaggaccgacatggaaggtccagcgttctcaaaaccccttaaagataagattaacccg |
| Mpmv10    | acccctccggccggaacagcatcaggaccgacatggaaggtccagcgttctcaaaaccccttaaagataagattaacccg |
| Mpmv11    | acccctccggccggaacagcatcaggaccgacatggaaggtccagcgttctcaaaaccccttaaagataagattaacccg |
| Mpmv12    | acccctccggccggaacagcatcaggaccgacatggaaggtccagcgttctcaaaacccCTtaaagataagattaacccg |
| Mpmv13    | acccctccggccggaacagcatcaggaccgacatggaaggtccagcgttctcaaaaccccttaaagataagattaacccg |
| Mpmv2     | acccctccggccggaacagcatcaggaccgacatggaaggtccagcgttctcaaaacccCTtaaagataagattaacccg |
| Mpmv3     | acccctccggccggaacagcatcaggaccgacatggaaggtccagcgttctcaaaaccccttaaagataagattaacccg |
| Mpmv4     | acccctccggccggaacagcatcaggaccgacatggaaggtccagcgttctcaaaaccccttaaagataagattaacccg |
| Mpmv5     | acccctccggccggaacagcatcaggaccgacatggaaggtccagcgttctcaaaaccccttaaagataagattaacccg |
| Mpmv6     | acccctccggccggaacagcatcaggaccgacatggaaggtccagcgttctcaaaaccccttaaagataagattaacccg |
| Mpmv7     | acccctccggccggaacagcatcaggaccgacatggaaggtccagcgttctcaaaaccccttaaagataagattaacccg |
| Mpmv8     | acccctccggccggaacagcatcaggaccgacatggaaggtccagcgttctcaaaaccccttaaagataagattaacccg |
| Mpmv9     | acccctccggccggaacagcatcaggaccgacatggaaggtccagcgttctcaaaacccCTtaaagataagattaacccg |

  

|           |                                                                                |
|-----------|--------------------------------------------------------------------------------|
| MPMV_CONS | TGGGCCCCCATGGAAGGTCCAGCGTTCTCAAAACCCCTTAAAGATAAGATTAACCCGTGGGCCCCCTGATAGTCCTGG |
| Mpmv1     | tgggcccccatggaaggtccagcgttctcaaaaccccttaaagataagattaacccgtgggccccctgatagtcctgg |
| Mpmv10    | tgggcccccatggaaggtccagcgttctcaaaaccccttaaagataagattaacccgtgggccccctgatagtcctgg |
| Mpmv11    | tgggcccccatggaaggtccagcgttctcaaaaccccttaaagataagattaacccgtgggccccctgatagtcctgg |
| Mpmv12    | tgggcccccatggaaggtccagcgttctcaaaacccCTtaaagataagattaacccgtgggccccctgatagtcctgg |
| Mpmv13    | tgggcccccatggaaggtccagcgttctcaaaaccccttaaagataagattaacccgtgggccccctgatagtcctgg |
| Mpmv2     | tgggcccccatggaaggtccagcgttctcaaaacccCTtaaagataagattaacccgtgggccccctgatagtcctgg |
| Mpmv3     | tgggcccccatggaaggtccagcgttctcaaaaccccttaaagataagattaacccgtgggccccctgatagtcctgg |
| Mpmv4     | tgggcccccatggaaggtccagcgttctcaaaaccccttaaagataagattaacccgtgggccccctgatagtcctgg |
| Mpmv5     | tgggcccccatggaaggtccagcgttctcaaaaccccttaaagataagattaacccgtgggccccctgatagtcctgg |
| Mpmv6     | tgggcccccatggaaggtccagcgttctcaaaaccccttaaagataagattaacccgtgggccccctgatagtcctgg |
| Mpmv7     | tgggcccccatggaaggtccagcgttctcaaaaccccttaaagataagattaacccgtgggccccctgatagtcctgg |
| Mpmv8     | tgggcccccatggaaggtccagcgttctcaaaaccccttaaagataagattaacccgtgggccccctgatagtcctgg |
| Mpmv9     | tgggcccccatggaaggtccagcgttctcaaaacccCTtaaagataagattaacccgtgggccccctgatagtcctgg |

  

|           |                                                                                  |
|-----------|----------------------------------------------------------------------------------|
| MPMV_CONS | GGATCTTAATAAGGGCAGGAGTATCAGTACCACATGACAGCCCTCATCAGGTCTTCAATGTTACTTGGAGAGTTACCAAC |
| Mpmv1     | ggatcttaataagggcaggagtatcagtaccacatgacagccctcatcaggtcttcaatgttacttggagagttaccaac |
| Mpmv10    | Agatcttaataagggcaggagtatcagtaccacatgacagccctcatcaggtcttcaatgttacttggagagttaccaac |
| Mpmv11    | Agatcttaataagggcaggagtatcagtaccacatgacagccctcatcaggtcttcaatgttacttggagagttaccaac |
| Mpmv12    | ggatcttaataagggcaggagtatcagtaccacatgacagccctcatcaggtcttcaatgttacttggagagttaccaac |
| Mpmv13    | ggatcttaataagggcaggagtatcagtaccacatgacagccctcatcaggtcttcaatgttacttggagagttaccaac |
| Mpmv2     | ggatcttaataagggcaggagtatcagtaccacatgacagccctcatcaggtcttcaatgttacttggagagttaccaac |
| Mpmv3     | ggatcttaataagggcaggagtatcagtaccacatgacagccctcatcaggtcttcaatgttacttggagagttaccaac |
| Mpmv4     | ggatcttaataagggcaggagtatcagtaccacatgacagccctcatcaggtcttcaatgttacttggagagttaccaac |
| Mpmv5     | ggatcttaataagggcaggagtatcagtaccacatgacagccctcatcaggtcttcaatgttacttAgagagttaccaac |
| Mpmv6     | ggatcttaataagggcaggagtatcagtaccacatgacagccctcatcaggtcttcaatgttacttggagagttaccaac |
| Mpmv7     | ggatcttaataagggcaggagtatcagtaccacatgacagccctcatcaggtcttcaatgttacttggagagttaccaac |
| Mpmv8     | ggatcttaataagggcaggagtatcagtaccacatgacagccctcatcaggtcttcaatgttacttggagagttaccaac |
| Mpmv9     | ggatcttaataagggcaggagtatcagtaccacatgacagccctcatcaggtcttcaatgttacttggagagttaccaac |

  

|           |                                                                                     |
|-----------|-------------------------------------------------------------------------------------|
| MPMV_CONS | TTAATGACAGGACAAACAGCTAATGCTACCTCCCTCCTGGGGACAATGACCGATGCCTTTCCCAAACGTACTTTGACTT     |
| Mpmv1     | ttaatgacaggacaaaacagctaatagtctacctccctcctggggacaatgaccgatgcctttcccaaactgtactttgactt |
| Mpmv10    | ttaatgacaggacaaaacagctaatagtctacctccctcctggggacaatgaccgatgcctttcccaaactgtactttgactt |
| Mpmv11    | ttaatgacaggacaaaacagctaatagtctacctccctcctggggacaatgaccgatgcctttcccaaactgtactttgactt |
| Mpmv12    | ttaatgacaggacaaaacagctaatagtctacctccctcctggggacaatgaccgatgcctttcccaaactgtactttgactt |
| Mpmv13    | ttaatgacaggacaaaacagctaatagtctacctccctcctggggacaatgaccgatgcctttcccaaactgtactttgactt |
| Mpmv2     | ttaatgacaggacaaaacagctaatagtctacctccctcctggggacaatgaccgatgcctttcccaaactgtactttgactt |
| Mpmv3     | ttaatgacaggacaaaacagctaatagtctacctccctcctggggacaatgaccgatgcctttcccaaactgtactttgactt |
| Mpmv4     | ttaatgacaggacaaaacagctaatagtctacctccctcctggggacaatgaccgatgcctttcccaaactgtactttgactt |
| Mpmv5     | ttaatgacaggacaaaacagctaatagtctacctccctcctggggacaatgaccgatgcctttcccaaactgtactttgactt |
| Mpmv6     | ttaatgacaggacaaaacagctaatagtctacctccctcctggggacaatgaccgatgcctttcccaaactgtactttgactt |
| Mpmv7     | ttaatgacaggacaaaacagctaatagtctacctccctcctggggacaatgaccgatgcctttcccaaactgtactttgactt |
| Mpmv8     | ttaatgacaggacaaaacagctaatagtctacctccctcctggggacaatgaccgatgcctttcccaaactgtactttgactt |
| Mpmv9     | ttaatgacaggacaaaacagctaatagtctacctccctcctggggacaatgaccgatgcctttcccaaactgtactttgactt |

|           |                                                                                   |
|-----------|-----------------------------------------------------------------------------------|
| MPMV_CONS | GTGCGATTTAATAGGGGACGACTGGGATGAGACTGGACTCGGGTGTTCGCACTCCCGGGGAAGAAAAAGGGCAAGAACAT  |
| Mpmv1     | gtgcgattttaataggggacgactgggatgagactggactcgggtgtcgcactcccgggggaagaaaaagggcaagaacat |
| Mpmv10    | gtgcgattttaataggggacgactgggatgagactggactcgggtgtcgcactcccgggggaagaaaaagggcaagaacat |
| Mpmv11    | gtgcgattttaataggggacgactgggatgagactggactcgggtgtcgcactcccgggggaagaaaaagggcaagaacat |
| Mpmv12    | gtgcgacCttaataggggacgactgggatgagactggactcgggtgtcgcactcccgggggaagaaaaagggcaagaacat |
| Mpmv13    | gtgcgattttaataggggacgactgggatgagactggactcgggtgtcgcactcccggggAaaAaaaaagggcaagaacat |
| Mpmv2     | gtgcgacCttaataggggacgactgggatgagactggactcgggtgtcgcactcccgggggaagaaaaagggcaagaacat |
| Mpmv3     | gtgcgattttaataggggacgactgggatgagactggactcgggtgtcgcactcccgggggaagaaaaagggcGagaacat |
| Mpmv4     | gtgcgattttaataggggacgactgggatgagactggactcgggtgtcgcactcccgggggaagaaaaagggcaagaacat |
| Mpmv5     | gtgcAAtttaataggggacgactgggatgagactggactcgggtgtcgcactcccggggAaagaaaaagggcaaAaacat  |
| Mpmv6     | gtgcgattttaataggggacgactgggatgagactggactcgggtgtcgcactcccgggggaagaaaaagggcaagaacat |
| Mpmv7     | gtgcgattttaataggggacgactgggatgagactggactcgggtgtcgcactcccgggggaagaaaaagggcaagaacat |
| Mpmv8     | gtgcgattttaataggggacgactgggatgagactggactcgggtgtcgcactcccgggggaagaaaaagggcaagaacat |
| Mpmv9     | gtgcgacCttaataggggacgactgggatgagactggactcgggtgtcgcactcccgggggaagaaaaagggcaagaacat |

  

|           |                                                                                    |
|-----------|------------------------------------------------------------------------------------|
| MPMV_CONS | TTGACTTCTATGTTTCCCCGGGCATACTGTACCAACAGGGTGTGGAGGCCCGAGAGAGGGCTACTGTGGCAAATGGGGC    |
| Mpmv1     | ttgacttctatgttttccccgggcatactgtaccaacaggggtgtggagggcccgagagagggctactgtggcaaatggggc |
| Mpmv10    | ttgacttctatgttttccccgggcatactgtaccaacaggggtgtggagggcccgagagagggctactgtggcaaatggggc |
| Mpmv11    | ttgacttctatgttttccccgggcatactgtaccaacaggggtgtggagggcccgagagagggctactgtggcaaatggggc |
| Mpmv12    | ttgacttctatgttttccccgggcatactgtaccaacaggggtgtggagggcccgagagagggctactgtggcaaatggggc |
| Mpmv13    | ttgacttctatgttttccccgggcatactgtTcaacaggggtgtggagggcccgagagagggctactgtggcaaatggggc  |
| Mpmv2     | ttgacttctatgttttccccgggcatactgtaccaacaggggtgtggagggcccgagagagggctactgtggcaaatggggc |
| Mpmv3     | ttgacttctatgttttccccgggcatactgtaccaacaggggtgtggagggcccgagagagggctactgtggcaaatggggc |
| Mpmv4     | ttgacttctatgttttccccgggcatactgtaccaacaggggtgtggagggcccgagagagggctactgtggcaaatggggc |
| Mpmv5     | ttgacttctatgttttccccgggcatactgtaccaacaggggtgtggagggcccgagagagggctactgtggcaaatggggc |
| Mpmv6     | ttgacttctatgttttccccgggcatactgtaccaacaggggtgtggagggcccgagagagggctactgtggcaaatggggc |
| Mpmv7     | ttgacttctatgttttccccgggcatactgtaccaacaggggtgtggagggcccgagagagggctactgtggcaaatggggc |
| Mpmv8     | ttgacttctatgttttccccgggcatactgtaccaacaggggtgtggagggcccgagagagggctactgtggcaaatggggc |
| Mpmv9     | ttgacttctatgttttccccgggcatactgtaccaacaggggtgtggagggcccgagagagggctactgtggcaaatggggc |

  

|           |                                                                                  |
|-----------|----------------------------------------------------------------------------------|
| MPMV_CONS | TGTGAGACCCTGGACAGGCATACTGGAAGCCATCATCATATGGGACCTAATTTCCCTTAAGCGAGGAAACACCCCTCG   |
| Mpmv1     | tgtgagaccactggacaggcatactggaagccatcatcatcatgggacctaatttcccttaagcgaggaaacacccctcg |
| Mpmv10    | tgtgagaccactggacaggcatactggaagccatcatcatcatgggacctaatttcccttaagcgaggaaacacccctcg |
| Mpmv11    | tgtgagaccactggacaggcatactggaagccatcatcatcatgggacctaatttcccttaagcgaggaaacacccctcg |
| Mpmv12    | tgtgagaccactggacaggcatactggaagccatcatcatcatgggacctaatttcccttaagcgaggaaacacccctcg |
| Mpmv13    | tgtgagaccactggacaggcatactggaagccatcatcatcatgggacctaatttcccttaagcgaggaaacacccctcg |
| Mpmv2     | tgtgagaccactggacaggcatactggaagccatcatcatcatgggacctaatttcccttaagcgaggaaacacccctcg |
| Mpmv3     | tgtgagaccactggacaggcatactggaagccatcatcatcatgggacctaatttcccttaagcgaggaaacacccctcg |
| Mpmv4     | tgtgagaccactggacaggcatactggaagccatcatcatcatgggacctaatttcccttaagcgaggaaacacccctcg |
| Mpmv5     | tgtgagaccactggacaggcatactggaagccatcatcatcatgggacctaatttcccttaagcgaggaaacacccctcg |
| Mpmv6     | tgtgagaccactggacaggcatactggaagccatcatcatcatgggacctaatttcccttaagcgaggaaacacccctcg |
| Mpmv7     | tgtgagaccactggacaggcatactggaagccatcatcatcatgggacctaatttcccttaagcgaggaaacacccctcg |
| Mpmv8     | tgtgagaccactggacaggcatactggaagccatcatcatcatgggacctaatttcccttaagcgaggaaacacccctcg |
| Mpmv9     | tgtgagaccactggacaggcatactggaagccatcatcatcatgggacctaatttcccttaagcgaggaaacacccctcg |

  

|           |                                                                                   |
|-----------|-----------------------------------------------------------------------------------|
| MPMV_CONS | GAATCAGGGCCCTGTTATGATTTCCTCAGCGGTCTCCAGTGGCATCCAGGGTGCCACACCGGGGGTTCGATGCAATCCCC  |
| Mpmv1     | gaatcagggccctgttatgatctctcagcgggtctccagtggcatccagggtgccacacccggggggtcgatgcaatcccc |
| Mpmv10    | gaatcagggccctgttatgatctctcagcgggtctccagtggcatccagggtgccacacccggggggtcgatgcaatcccc |
| Mpmv11    | gaatcagggccctgttatgatctctcagcgggtctccagtggcatccagggtgccacacccggggggtcgatgcaatcccc |
| Mpmv12    | gaatcagggccctgttatgatctctcagcgggtctccagtggcatccagggtgccacacccggggggtcgatgcaatcccc |
| Mpmv13    | gaatcagggccctgttatgatctctcagcgggtctccagtggcatccagggtgccacacccggggggtcgatgcaatcccc |
| Mpmv2     | gaatcagggccctgttatgatctctcagcgggtctccagtggcatccagggtgccacacccggggggtcgatgcaatcccc |
| Mpmv3     | gaatcagggccctgttatgatctctcagcgggtctccagtggcatccagggtgccacacccggggggtcgatgcaatcccc |
| Mpmv4     | gaatcagggccctgttatgatctctcagcgggtctccagtggcatccagggtgccacacccggggggtcgatgcaatcccc |
| Mpmv5     | gaatcagggccctgttatgatctctcagcgggtctccagtAcatccagggtgccacacccggggggtcgatgcaatcccc  |
| Mpmv6     | gaatcagggccctgttatgatctctcagcgggtctccagtggcatccagggtgccacacAggggggtcgatgcaatcccc  |
| Mpmv7     | gaatcagggccctgttatgatctctcagcgggtctccagtggcatccagggtgccacacccggggggtcgatgcaatcccc |
| Mpmv8     | gaatcagggccctgttatgatctctcagcgggtctccagtggcatccagggtgccacacccggggggtcgatgcaatcccc |
| Mpmv9     | gaatcagggccctgttatgatctctcagcgggtctccagtggcatccagggtgccacacccggggggtcgatgcaatcccc |

|           |                                                                                  |
|-----------|----------------------------------------------------------------------------------|
| MPMV_CONS | TAGTCCTAGAATTCACTGACGCGGGTAAAAAGGCCAGCTGGGATGGCCCCAAAGTATGGGGACTAAGACTGTACCGATCC |
| Mpmv1     | tagtcctagaattcactgacgcggttaaaaagggcagctgggatggccccaagatggggactaagactgtaccgatcc   |
| Mpmv10    | tagtcctagaattcactgacgcggttaaaaagggcagctgggatggccccaagatggggactaagactgtaccgatcc   |
| Mpmv11    | tagtcctagaattcactgacgcggttaaaaagggcagctgggatggccccaagatggggactaagactgtaccgatcc   |
| Mpmv12    | tagtcctagaattcactgacgcggttaaaaagggcagctgggatggccccaagatggggactaagactgtaccgatcc   |
| Mpmv13    | tagtcctagaattcactgacgcggttaaaaagggcagctgggatggccccaagatggggactaagactgtaccgatcc   |
| Mpmv2     | tagtcctagaattcactgacgcggttaaaaagggcagctgggatggccccaagatggggactaagactgtaccgatcc   |
| Mpmv3     | tagtcctagaattcactgacgcggttaaaaagggcagctgggatggccccaagatggggactaagactgtaccgatcc   |
| Mpmv4     | tagtcctagaattcactgacgcggttaaaaagggcagctgggatggccccaagatggggactaagactgtaccgatcc   |
| Mpmv5     | tagtcctagaattcactgacgcggttaaaaagggcagctgggatggccccaagatggggactaagactgtaccgatcc   |
| Mpmv6     | tagtcctagaattcactgacgcggttaaaaagggcagctgggatggccccaagatggggactaagactgtaccgatcc   |
| Mpmv7     | tagtcctagaattcactgacgcggttaaaaagggcagctgggatggccccaagatggggactaagactgtaccgatcc   |
| Mpmv8     | tagtcctagaattcactgacgcggttaaaaagggcagctgggatggccccaagatggggactaagactgtaccgatcc   |
| Mpmv9     | tagtcctagaattcactgacgcggttaaaaagggcagctgggatggccccaagatggggactaagactgtaccgatcc   |
|           |                                                                                  |
| MPMV_CONS | ACAGGAACCGACCCGGTGACCCGGTTCTCTTTGACCCGCCAGGTCCTCAATATAGGGCCCCGCATCCCCATTGGGCCTAA |
| Mpmv1     | acaggaaccgacccggtgaccgggttctctttgaccgccaggtcctcaatatagggccccgcacccccattggggcctaa |
| Mpmv10    | acaggaaccgacccggtgaccgggttctctttgaccgccaggtcctcaatatagggccccgcacccccattggggcctaa |
| Mpmv11    | acaggaaccgacccggtgaccgggttctctttgaccgccaggtcctcaatatagggccccgcacccccattggggcctaa |
| Mpmv12    | acaggaaccgacccggtgaccgggttctctttgaccgccaggtcctcaatatagggccccgcacccccattggggcctaa |
| Mpmv13    | acaggaaccgacccggtgaccgggttctctttgaccgccaggtcctcaatatagggccccgcacccccattggggcctaa |
| Mpmv2     | acaggaaccgacccggtgaccgggttctctttgaccgccaggtcctcaatatagggccccgcacccccattggggcctaa |
| Mpmv3     | acaggaaccgacccggtgaccgggttctctttgaccgccaggtcctcaatatagggccccgcacccccattggggcctaa |
| Mpmv4     | acaggaaccgacccggtgaccgggttctctttgaccgccaggtcctcaatatagggccccgcacccccattggggcctaa |
| Mpmv5     | acaggaaccgacccggtgaccgggttctctttgaccgccaggtcctcaatatagggccccgcacccccattggggcctaa |
| Mpmv6     | acaggaaccgacccggtgaccgggttctctttgaccgccaggtcctcaatatagggccccgcacccccattggggcctaa |
| Mpmv7     | acaggaaccgacccggtgaccgggttctctttgaccgccaggtcctcaatatagggccccgcacccccattggggcctaa |
| Mpmv8     | acaggaaccgacccggtgaccgggttctctttgaccgccaggtcctcaatatagggccccgcacccccattggggcctaa |
| Mpmv9     | acaggaaccgacccggtgaccgggttctctttgaccgccaggtcctcaatatagggccccgcacccccattggggcctaa |
|           |                                                                                  |
| MPMV_CONS | TCCCGTGATCACTGACCAGTTACCCCCCTCCCGACCCGTGCAGATCATGCTCCCCAGGCCTCCTCAGCCTTCCCCTACAG |
| Mpmv1     | tcccgatgactgaccagttacccccctcccgaccggtgcagatcatgctccccaggcctcctcagccttccccctacag  |
| Mpmv10    | tcccgatgactgaccagttacccccctcccgaccggtgcagatcatgctccccaggcctcctcagccttccccctacag  |
| Mpmv11    | tcccgatgactgaccagttacccccctcccgaccggtgcagatcatgctccccaggcctcctcagccttccccctacag  |
| Mpmv12    | tcccgatgactgaccagttacccccctcccgaccggtgcagatcatgctccccaggcctcctcagccttccccctacag  |
| Mpmv13    | tcccgatgactgaccagttacccccctcccgaccggtgcagatcatgctccccaggcctcctcagccttccccctacag  |
| Mpmv2     | tcccgatgactgaccagttacccccctcccgaccggtgcagatcatgctccccaggcctcctcagccttccccctacag  |
| Mpmv3     | tcccgatgactgaccagttacccccctcccgaccggtgcagatcatgctccccaggcctcctcagccttccccctacag  |
| Mpmv4     | tcccgatgactgaccagttacccccctcccgaccggtgcagatcatgctccccaggcctcctcagccttccccctacag  |
| Mpmv5     | tcccgatgactgaccagttacccccctcccgaccggtgcagatcatgctccccaggcctcctcagccttccccctacag  |
| Mpmv6     | tcccgatgactgaccagttacccccctcccgaccggtgcagatcatgctccccaggcctcctcagccttccccctacag  |
| Mpmv7     | tcccgatgactgaccagttacccccctcccgaccggtgcagatcatgctccccaggcctcctcagccttccccctacag  |
| Mpmv8     | tcccgatgactgaccagttacccccctcccgaccggtgcagatcatgctccccaggcctcctcagccttccccctacag  |
| Mpmv9     | tcccgatgactgaccagttacccccctcccgaccggtgcagatcatgctccccaggcctcctcagccttccccctacag  |
|           |                                                                                  |
| MPMV_CONS | GCGCAGCCTCTATACAACCTGGGACGGGAGACAGACTGCTGAACCTGGTAGATGGAGCCTACCAAGCACTCAACCTCACC |
| Mpmv1     | gcgagcctctatacaacctgggacgggagacagactgctgaacctggtagatggagcctaccaagcactcaacctcacc  |
| Mpmv10    | gcgagcctctatacaacctgggacgggagacagactgctgaacctggtagatggagcctaccaagcactcaacctcacc  |
| Mpmv11    | gcgagcctctatacaacctgggacgggagacagactgctgaacctggtagatggagcctaccaagcactcaacctcacc  |
| Mpmv12    | gcgagcctctatacaacctgggacgggagacagactgctgaacctggtagatggagcctaccaagcactcaacctcacc  |
| Mpmv13    | gcgagcctctatacaacctgggacgggagacagactgctgaacctggtagatggagcctaccaagcactcaacctcacc  |
| Mpmv2     | gcgagcctctatacaacctgggacgggagacagactgctgaacctggtagatggagcctaccaagcactcaacctcacc  |
| Mpmv3     | gcgagcctctatacaacctgggacgggagacagactgctgaacctggtagatggagcctaccaagcactcaacctcacc  |
| Mpmv4     | gcgagcctctatacaacctgggacgggagacagactgctgaacctggtagatggagcctaccaagcactcaacctcacc  |
| Mpmv5     | gcgagcctctatacaacctgggacgggagacagactgctgaacctggtagatggagcctaccaagcactcaacctcacc  |
| Mpmv6     | gcgagcctctatacaacctgggacgggagacagactgctgaacctggtagatggagcctaccaagcactcaacctcacc  |
| Mpmv7     | gcgagcctctatacaacctgggacgggagacagactgctgaacctggtagatggagcctaccaagcactcaacctcacc  |
| Mpmv8     | gcgagcctctatacaacctgggacgggagacagactgctgaacctggtagatggagcctaccaagcactcaacctcacc  |
| Mpmv9     | gcgagcctctatacaacctgggacgggagacagactgctgaacctggtagatggagcctaccaagcactcaacctcacc  |

|           |                                                                                     |
|-----------|-------------------------------------------------------------------------------------|
| MPMV_CONS | AGTCCTGACAAAACCCAAGAGTGCTGGTTGTGCTCGGTATCGGGACCCCCCTATTACGAAGGGGTTGCCGTCCTAGGTAC    |
| Mpmv1     | agtccctgacaaaacccaagagtgcctgggttggtctcggtatcgggacccccctattacgaaggggttgccgtcctaggtac |
| Mpmv10    | agtccctgacaaaacccaagagtgcctgggttggtctcggtatcgggacccccctattacgaaggggttgccgtcctaggtac |
| Mpmv11    | agtccctgacaaaacccaagagtgcctgggttggtctcggtatcgggacccccctattacgaaggggttgccgtcctaggtac |
| Mpmv12    | agtccctgacaaaacccaagagtgcctgggttggtctcggtatcgggacccccctattacgaaggggttgccgtcctaggtac |
| Mpmv13    | agtccctgacaaaacccaagagtgcctgggttggtctcggtatcgggacccccctattacgaaggggttgccgtcctaggtac |
| Mpmv2     | agtccctgacaaaacccaagagtgcctgggttggtctcggtatcgggacccccctattacgaaggggttgccgtcctaggtac |
| Mpmv3     | agtccctgacaaaacccaagagtgcctgggttggtctcggtatcgggacccccctattacgaaggggttgccgtcctaggtac |
| Mpmv4     | agtccctgacaaaacccaagagtgcctgggttggtctcggtatcgggacccccctattacgaaggggttgccgtcctaggtac |
| Mpmv5     | agtccctgacaaaacccaagagtgcctgggttggtctcggtatcgggacccccctattacgaaggggttgccgtcctaggtac |
| Mpmv6     | agtccctgacaaaacccaagagtgcctgggttggtctcggtatcgggacccccctattacgaaggggttgccgtcctaggtac |
| Mpmv7     | agtccctgacaaaacccaagagtgcctgggttggtctcggtatcgggacccccctattacgaaggggttgccgtcctaggtac |
| Mpmv8     | agtccctgacaaaacccaagagtgcctgggttggtctcggtatcgggacccccctattacgaaggggttgccgtcctaggtac |
| Mpmv9     | agtccctgacaaaacccaagagtgcctgggttggtctcggtatcgggacccccctattacgaaggggttgccgtcctaggtac |
|           |                                                                                     |
| MPMV_CONS | CTACTCCAACCATACCTCTGCCCCAGCTAACTGCTCCGTGGCCTCCCAACACAAGCTGACCTGTCCGAAGTAACCGGAC     |
| Mpmv1     | ctactccaaccatacctctgccccagctaactgctccgtggcctcccaacacaagctgacctgtccgaagtaaacccggac   |
| Mpmv10    | ctactccaaccatacctctgccccagctaactgctccgtggcctcccaacacaagctgacctgtccgaagtaaacccggac   |
| Mpmv11    | ctactccaaccatacctctgccccagctaactgctccgtggcctcccaacacaagctgacctgtccgaagtaaacccggac   |
| Mpmv12    | ctactccaaccatacctctgccccagctaactgctccgtggcctcccaacacaagctgacctgtccgaagtaaacccggac   |
| Mpmv13    | ctactccaaccatacctctgccccagctaactgctccgtggcctcccaacacaagctgacctgtccgaagtaaacccggac   |
| Mpmv2     | ctactccaaccatacctctgccccagctaactgctccgtggcctcccaacacaagctgacctgtccgaagtaaacccggac   |
| Mpmv3     | ctactccaaccatacctctgccccagctaactgctccgtggcctcccaacacaagctgacctgtccgaagtaaacccggac   |
| Mpmv4     | ctactccaaccatacctctgccccagctaactgctccgtggcctcccaacacaagctgacctgtccgaagtaaacccggac   |
| Mpmv5     | ctactccaaccatacctctgccccagctaactgctccgtggcctcccaacacaagctgacctgtccgaagtaaacccggac   |
| Mpmv6     | ctactccaaccatacctctgccccagctaactgctccgtggcctcccaacacaagctgacctgtccgaagtaaacccggac   |
| Mpmv7     | ctactccaaccatacctctgccccagctaactgctccgtggcctcccaacacaagctgacctgtccgaagtaaacccggac   |
| Mpmv8     | ctactccaaccatacctctgccccagctaactgctccgtggcctcccaacacaagctgacctgtccgaagtaaacccggac   |
| Mpmv9     | ctactccaaccatacctctgccccagctaactgctccgtggcctcccaacacaagctgacctgtccgaagtaaacccggac   |
|           |                                                                                     |
| MPMV_CONS | AGGGACTCTGCGTAGGAGCAGTTCCCAAAACCCATCAGGCCCTGTGTAATACCACCCAGAATACAAGCGACGGGTCTTAC    |
| Mpmv1     | agggactctgctgtaggagcagttcccaaaacccatcaggccctgtgtaataaccaccagaataacaagcgacgggtcctac  |
| Mpmv10    | agggactctgctgtaggagcagttcccaaaacccatcaggccctgtgtaataaccaccagaataacaagcgacgggtcctac  |
| Mpmv11    | agggactctgctgtaggagcagttcccaaaacccatcaggccctgtgtaataaccaccagaataacaagcgacgggtcctac  |
| Mpmv12    | agggactctgctgtaggagcagttcccaaaacccatcaggccctgtgtaataaccaccagaataacaagcgacgggtcctac  |
| Mpmv13    | agggactctgctgtaggagcagttcccaaaacccatcaggccctgtgtaataaccaccagaataacaagcgacgggtcctac  |
| Mpmv2     | agggactctgctgtaggagcagttcccaaaacccatcaggccctgtgtaataaccaccagaataacaagcgacgggtcctac  |
| Mpmv3     | agggactctgctgtaggagcagttcccaaaacccatcaggccctgtgtaataaccaccagaataacaagcgacgggtcctac  |
| Mpmv4     | agggactctgctgtaggagcagttcccaaaacccatcaggccctgtgtaataaccaccagaataacaagcgacgggtcctac  |
| Mpmv5     | agggactctgctgtaggagcagttcccaaaacccatcaggccctgtgtaataaccaccagaataacaagcgacgggtcctac  |
| Mpmv6     | agggactctgctgtaggagcagttcccaaaacccatcaggccctgtgtaataaccaccagaataacaagcgacgggtcctac  |
| Mpmv7     | agggactctgctgtaggagcagttcccaaaacccatcaggccctgtgtaataaccaccagaataacaagcgacgggtcctac  |
| Mpmv8     | agggactctgctgtaggagcagttcccaaaacccatcaggccctgtgtaataaccaccagaataacaagcgacgggtcctac  |
| Mpmv9     | agggactctgctgtaggagcagttcccaaaacccatcaggccctgtgtaataaccaccagaataacaagcgacgggtcctac  |
|           |                                                                                     |
| MPMV_CONS | TATCTGGCTGCTCCCGCGGGACCATTGGGCTTGCAACACCGGGCTCACTCCCTGCCTATCTACTACTGTACTCAACCT      |
| Mpmv1     | tatctggctgctcccgccgggaccatttgggcttgcaacacggggtcactccctgcttatctactactgtactcaacct     |
| Mpmv10    | tatctggctgctcccgccgggaccatttgggcttgcaacacggggtcactccctgcttatctactactgtactcaacct     |
| Mpmv11    | tatctggctgctcccgccgggaccatttgggcttgcaacacggggtcactccctgcttatctactactgtactcaacct     |
| Mpmv12    | tatctggctgctcccgccgggaccatttgggcttgcaacacggggtcactccctgcttatctactactgtactcaacct     |
| Mpmv13    | tatctggctgctcccgccgggaccatttgggcttgcaacacggggtcactccctgcttatctactactgtactcaacct     |
| Mpmv2     | tatctggctgctcccgccgggaccatttgggcttgcaacacggggtcactccctgcttatctactactgtactcaacct     |
| Mpmv3     | tatctggctgctcccgccgggaccatttgggcttgcaacacggggtcactccctgcttatctactactgtactcaacct     |
| Mpmv4     | tatctggctgctcccgccgggaccatttgggcttgcaacacggggtcactccctgcttatctactactgtactcaacct     |
| Mpmv5     | tatctggctgctcccgccgggaccatttgggcttgcaacacggggtcactccctgcttatctactactgtactcaacct     |
| Mpmv6     | tatctggctgctcccgccgggaccatttgggcttgcaacacggggtcactccctgcttatctactactgtactcaacct     |
| Mpmv7     | tatctggctgctcccgccgggaccatttgggcttgcaacacggggtcactccctgcttatctactactgtactcaacct     |
| Mpmv8     | tatctggctgctcccgccgggaccatttgggcttgcaacacggggtcactccctgcttatctactactgtactcaacct     |
| Mpmv9     | tatctggctgctcccgccgggaccatttgggcttgcaacacggggtcactccctgcttatctactactgtactcaacct     |

|           |                                                                                    |
|-----------|------------------------------------------------------------------------------------|
| MPMV_CONS | CACCACCGATTACTGTGTCCTGGTTGAGCTCTGGCCAAAGGTGACCTACCACTCCCCTGGTTATGTTTATGGCCAGTTTG   |
| Mpmv1     | caccaccgattactgtgtcctgggttgagctctggccaaaggtgacctaccactcccctgggtatgtttatggccagtttg  |
| Mpmv10    | -----                                                                              |
| Mpmv11    | caccaccgattactgtgtcctgggttgagctctggccaaaggtgacctaccactcccctgggtatgtttatggccagtttg  |
| Mpmv12    | caccaccgattactgtgtcctgggttgagctctggccaaaggtgacctaccactcccctgggtatgtttatggccagtttg  |
| Mpmv13    | caccaccgattactgtgtcctgggttgagctctggccaaaggtgacctaccactcccctgggtatgtttatggccagtttg  |
| Mpmv2     | caccaccgattactgtgtcctgggttgagctctggccaaaggtgacctaccactcccctgggtatgtttatggccagtttg  |
| Mpmv3     | caccaccgattactgtgtcctgggttgagctctggccaaaggtgacctaccactcccctgggtatgtttatggccagtttg  |
| Mpmv4     | caccaccgattactgtgtcctgggttgagctctggccaaaggtgacctaccactcccctgggtatgtttatggccagtttg  |
| Mpmv5     | caccaccgattactgtgtcctgggttgagctctggccaaaggtgacctaccactcccctgggtatgtttatggccagtttg  |
| Mpmv6     | caccaccgattactgtgtcctgggttgagctctggccaaaggtgacctaccactcccctgggtatgtttatggccagtttg  |
| Mpmv7     | caccaccgattactgtgtcctgggttgagctctggccaaaggtgacctaccactcccctgggtatgtttatggccagtttg  |
| Mpmv8     | caccaccgattactgtgtcctgggttgagctctggccaaaggtgacctaccactcccctgggtatgtttatggccagtttg  |
| Mpmv9     | caccaccgattactgtgtcctgggttgagctctggccaaaggtgacctaccactcccctgggtatgtttatggccagtttg  |
| MPMV_CONS | AGAGAAAAACCAATATAAAAAGAGAGCCGGTGTCACTTAACCTCTGGCCCTGCTGTTGGGAGGACTTACTATGGGCGGCATA |
| Mpmv1     | agagaaaaaccaaataaaaaagagagccgggtgtcattaactctggccctgctggttgggaggacttactatgggcggcata |
| Mpmv10    | -----aaaagagagccgggtgtcattaactctggccctgctggttgggaggacttactatgggcggcata             |
| Mpmv11    | agagaaaaaccaaataaaaaagagagccgggtgtcattaactctggccctgctggttgggaggacttactatgggcggcata |
| Mpmv12    | agagaaaaaccaaataaaaaagagagccgggtgtcattaactctggccctgctggttgggaggacttactatgggcggcata |
| Mpmv13    | agagaaaaaccaaataaaaaagagagccgggtgtcattaactctggccctgctggttgggaggacttactatgggcggcata |
| Mpmv2     | agagaaaaaccaaataaaaaagagagccgggtgtcattaactctggccctgctggttgggaggacttactatgggcggcata |
| Mpmv3     | agagaaaaaccaaataaaaaagagagccgggtgtcattaactctggccctgctggttgggaggacttactatgggcggcata |
| Mpmv4     | agagaaaaaccaaataaaaaagagagccgggtgtcattaactctggccctgctggttgggaggacttactatgggcggcata |
| Mpmv5     | agagaaaaaccaaataaaaaagagagccgggtgtcattaactctggccctgctggttgggaggacttactatgggcggcata |
| Mpmv6     | agagaaaaaccaaataaaaaagagagccgggtgtcattaactctggccctgctggttgggaggacttactatgggcggcata |
| Mpmv7     | Aagaaaaaccaaataaaaaagagagccgggtgtcattaactctggccctgctggttgggaggacttactatgggcggcata  |
| Mpmv8     | agagaaaaaccaaataaaaaagagagccgggtgtcattaactctggccctgctggttgggaggacttactatgggcggcata |
| Mpmv9     | agagaaaaaccaaataaaaaagagagccgggtgtcattaactctggccctgctggttgggaggacttactatgggcggcata |
| MPMV_CONS | GCTGCAGGAGTAGGAACAGGGACTACAGCCCTAGTGGCCACCAAGCAATTCGAGCAGCTCCAGGCAGCCATACATACAGA   |
| Mpmv1     | gctgcaggagtaggaacagggactacagccctagtggccaccaagcaattcgagcagctccaggcagccatacatacaga   |
| Mpmv10    | gctgcaggagtaggaacagggactacagccctagtggccaccaagcaattcgagcagctccaggcagccatacatacaga   |
| Mpmv11    | gctgcaggagtaggaacagggactacagccctagtggccaccaagcaattcgagcagctccaggcagccatacatacaga   |
| Mpmv12    | gctgcaggagtaggaacagggactacagccctagtggccaccaagcaattcgagcagctccaggcagccatacatacaga   |
| Mpmv13    | gcC-----tc-agcagctTcaTgca--c-TGc--acTga                                            |
| Mpmv2     | gctgcaggagtaggaacagggactacagccctagtggccaccaagcaattcgagcagctccaggcagccatacatacaga   |
| Mpmv3     | gctgcaggagtaggaacagggactacagccctagtggccaccaagcaattcgagcagctccaggcagccatacatacaga   |
| Mpmv4     | gctgcaggagtaggaacagggactacagccctagtggccaccaagcaattcgagcagctccaggcagccatacatacaga   |
| Mpmv5     | gctgcaggagtaggaacagggactacagccctagtggccaccaagcaattcgagcagctccaggcagccatacatacaga   |
| Mpmv6     | gctgcaggagtaggaacagggactacagccctagtggccaccaagcaattcgagcagctccaggcagccatacatacaga   |
| Mpmv7     | gctgcaggagtaggaacagggactacagccctagtggccaccaagcaattcgagcagctccaggcagccatacatacaga   |
| Mpmv8     | gctgcaggagtaggaacagggactacagccctagtggccaccaagcaattcgagcagctccaggcagccatacatacaga   |
| Mpmv9     | gctgcaggagtaggaacagggactacagccctagtggccaccaagcaattcgagcagctccaggcagccatacatacaga   |
| MPMV_CONS | CCTTGGGGCCTTAGAAAAATCAGTCAGTGCCTTAGAAAAAGTCTCTGACCTCGTTGTCTGAGGTGGTCTACAGAACCGBA   |
| Mpmv1     | ccttggggccttaAaaaaatcagtcagtgccctagaaaagtctctgacctcgttgtctgaggtgggtcctacagaaccgga  |
| Mpmv10    | ccttggggccttagaaaaatcagtcagtgccctagaaaagtctctgacctcgttgtctgaggtgggtcctacagaaccgga  |
| Mpmv11    | ccttggggccttagaaaaatcagtcagtgccctAaaaaagtctctgacctcgttgtctgaggtgggtcctacagaaccgga  |
| Mpmv12    | ccttggggccttagaaaaatcagtcagtgccctagaaaagtctctgacctcgttgtctgaggtgggtcctacagaaccgga  |
| Mpmv13    | c--tgg-----agtgcagtgccctagaaaagtctctgacctcgttgtctgaggtgggtcctacagaaccgga           |
| Mpmv2     | ccttggggccttagaaaaatcagtcagtgccctagaaaagtctctgacctcgttgtctgaggtgggtcctacagaaccgga  |
| Mpmv3     | ccttggggccttagaaaaatcagtcagtgccctagaaaagtctctgacctcgttgtctgaggtgggtcctacagaaccgga  |
| Mpmv4     | ccttggggccttaAaaaaatcagtcagtgccctagaaaagtctctgacctcgttgtctgaggtgggtcctacagaaccgga  |
| Mpmv5     | ccttggggccttagaaaaatcagtcagtgccctAaaaaagtctctgacctcgttgtctgaggtgggtcctacagaaccgga  |
| Mpmv6     | ccttggggccttagaaaaatcagtcagtgccctagaaaagtctctgacctcgttgtctgaggtgggtcctacagaaccgga  |
| Mpmv7     | ccttggggccttagaaaaatcagtcagtgccctagaaaagtctctgacctcgttgtctgaggtgggtcctacagaaccgga  |
| Mpmv8     | ccttggggccttagaaaaatcagtcagtgccctagaaaagtctctgacctcgttgtctgaggtgggtcctacagaaccgga  |
| Mpmv9     | ccttggggccttagaaaaatcagtcagtgccctagaaaagtctctgacctcgttgtctgaggtgggtcctacagaaccgga  |

|           |                                                                                      |
|-----------|--------------------------------------------------------------------------------------|
| MPMV_CONS | GAGGATTAGATCTACTGTTCTCTAAAAGAAGGAGGATTATGTGCTGCCCTAAAAGAAGAATGCTGTTTCTACGCGGACCAC    |
| Mpmv1     | gaggattagatctactgttctctaaaagaaggaggattatgtgctgccctaaaagaagaatgctgtttctacgcggaaccac   |
| Mpmv10    | gaggattagatctactgttctctaaaagaaggaggattatgtgctgccctaaaagaagaatgctgCttctacgcggaaccac   |
| Mpmv11    | gaggattagatctactgttctctaaaagaaggaggattatgtgctgccctaaaagaagaatgctgtttctacgcggaaccac   |
| Mpmv12    | gaAagattagatctactgttctctaaaagaaggaggattatgtgctgccctaaaagaagaatgctgtttctacgcggaaccac  |
| Mpmv13    | gaggattagatctactgttctctaaaaAaagggaAagattatgtgctgccctaaaagaagaatgctgtttctacgcggaaccac |
| Mpmv2     | gaggattagatctactgttctctaaaagaaggaggattatgtgctgccctaaaagaagaatgctgtttctacgcggaaccac   |
| Mpmv3     | gaggattagatctactgttctctaaaagaaggaggattatgtgctgccctaaaagaagaatgctgtttctacgcggaaccac   |
| Mpmv4     | gaggattagatctactgttctctaaaagaaggaggattatgtgctgccctaaaagaagaatgctgtttctacgcggaaccac   |
| Mpmv5     | gaggattagatctactgttctctaaaaAaagggaAagattatgtgctgccctaaaagaagaatgctgtttctacgcggaaccac |
| Mpmv6     | gaggattagatctactgttctctaaaagaaggaggattatgtgctgccctaaaagaagaatgctgtttctacgcggaaccac   |
| Mpmv7     | gaggattagatctactgttctctaaaagaaggaggattatgtgctgccctaaaagaagaatgctgtttctacgcggaaccac   |
| Mpmv8     | gaAagattagatctactgttctctaaaagaaggaggattatgtgctgccctaaaagaagaatgctgtttctacgcggaaccac  |
| Mpmv9     | gaggattagatctactgttctctaaaagaaggaggattatgtgctgccctaaaagaagaatgctgtttctacgcggaaccac   |
| MPMV_CONS | ACTGGCGTAGTGAGAGATAGCATGGCAAAGCTAAGAGAAAGGTTAAACCAGAGACAAAAATTGTTCGAATCAGGACAAGG     |
| Mpmv1     | actggcgtagtgagagatagcatggcacaagctaagagaaaaggttaaaccagagacaaaaattggttcgaatcaggacaagg  |
| Mpmv10    | actggcgtagtgagagatagcatggcacaagctaagagaaaaggttaaaccagagacaaaaattggttcgaatcaggacaagg  |
| Mpmv11    | actggcgtagtgagagatagcatggcacaagctaagagaaaaggttaaaccagagacaaaaattggttcgaatcaggacaagg  |
| Mpmv12    | actggcgtagtgagagatagcatggcacaagctaagagaaaaggttaaaccagagacaaaaattggttcgaatcaggacaagg  |
| Mpmv13    | actggcgtagtgagagatagcatggcacaagctaagagaaaaggttaaaccagagacaaaaattggttcgaatcaggacaagg  |
| Mpmv2     | actggcgtagtgagagatagcatggcacaagctaagagaaaaggttaaaccagagacaaaaattggttcgaatcaggacaagg  |
| Mpmv3     | actggcgtagtgagagatagcatgAcaaaagctaagagaaaaggttaaaccagagacaaaaattggttcgaatcaggacaagg  |
| Mpmv4     | actggcgtagtgagagatagcatggcacaagctaagagaaaaggttaaaccagagacaaaaattggttcgaatcaggacaagg  |
| Mpmv5     | actggcgtagtgagagatagcatggcacaagctaagaAaaaaggttaaaccagagacaaaaattggttcgaatcaggacaagg  |
| Mpmv6     | actggcgtagtgagagatagcatggcacaagctaagagaaaaggttaaaccagagacaaaaattggttcgaatcaggacaagg  |
| Mpmv7     | actggcgtagtgagagatagcatggcacaagctaagagaaaaggttaaaccagagacaaaaattggttcgaatcaggacaagg  |
| Mpmv8     | actggcgtagtgagagatagcatggcacaagctaagagaaaaggttaaaccagagacaaaaattggttcgaatcaggacaagg  |
| Mpmv9     | actggcgtagtgagagatagcatggcacaagctaagagaaaaggttaaaccagagacaaaaattggttcgaatcaggacaagg  |
| MPMV_CONS | GTGGTTTGAGGGACTGTTTAAACAGGTCCCCATGGTTTACGACCTTGATATCCACCATTATGGGCCCTTGATAATACTCT     |
| Mpmv1     | gtggtttgagggactgtttaacagggtccccatgggttcacgaccttAatatccaccattatggggcccttgataatactct   |
| Mpmv10    | gtggtttgagggactgtttaacagggtccccatgggttcacgaccttgatatccaccattatggggcccttgataatactct   |
| Mpmv11    | gtggtttgagggactgtttaacagggtccccatgggttcacgaccttgatatccaccattatggggcccttgataatactct   |
| Mpmv12    | gtggtttgagggactgtttaacagggtccccatgggttcacgaccttgatatccaccattatggggcccttgataatactct   |
| Mpmv13    | gtggtttgagggactgtttaacagggtccccatgggttcacgaccttgatatccaccattatggggcccttgataatactct   |
| Mpmv2     | gtggtttgagggactgtttaacagggtccccatgggttcacgaccttgatatccaccattatggggcccttgataatactct   |
| Mpmv3     | gtggtttgagggactgtttaacagggtccccatgggttcacgaccttgatatccaccattatggggcccttgataatactct   |
| Mpmv4     | gtggtttgagggactgtttaacagggtccccatgggttcacgaccttgGtatccaccattatggggcccttgataatactct   |
| Mpmv5     | gtggtttgagggactgtttaacagggtccccatAgttcacgaccttgatatccaccattatggggcccttgataatactct    |
| Mpmv6     | gtggtttgagggactgtttaacagggtccccatgggttcacgaccttgatatccaccattatggggcccttgataatactct   |
| Mpmv7     | gtggtttgagggactgtttaacagggtccccatgggttcacgaccttgatatccaccattatggggcccttgataatactct   |
| Mpmv8     | gtggtttgagggactgtttaacagggtccccatgggttcacgaccttgGtatccaccattatggggcccttgataatactct   |
| Mpmv9     | gtggtttgagggactgtttaacagggtccccatgggttcacgaccttgatatccaccattatggggcccttgataatactct   |
| MPMV_CONS | TATTAATCCTACTCTTCGGACCCTGTATTCTCAACCGCTTGGTCCAGTTTGTAAAAGACAGAATTCGGTGGTG            |
| Mpmv1     | tattaatcctactcttcggaccctgtattctcaaccgcttggtccagtttgtaaaagacagaatttcggtggtg           |
| Mpmv10    | tattaatcctactcttcggaccctgtattctcaaccgcttggtccagtttgtaaaagacagaatttcggtggtg           |
| Mpmv11    | tattaatcctactcttcggaccctgtattctcaaccgcttggtccagtttgtaaaagacagaatttcggtggtg           |
| Mpmv12    | tattaatcctactcttcggaccctgtattctcaaccgcttggtccagtttgtaaaagacagaatttcggtggtg           |
| Mpmv13    | tattaatcctactcttcggaccctgtattctcaaccgcttggtccagtttgtaaaagacagaatttcggtggtg           |
| Mpmv2     | tattaatcctactcttcggaccctgtattctcaaccgcttggtccagtttgtaaaagacagaatttcggtggtg           |
| Mpmv3     | tattaatcctactcttcggaccctgtattctcaaccgcttggtccagtttAtaaaagacagaatttcggtggtg           |
| Mpmv4     | tattaatcctactcttcggaccctgtattctcaaccgcttggtccagtttgtaaaagacagaatttcggtggtg           |
| Mpmv5     | tattaatcctactcttcggaccctgtattctcaaccgcttggtccagtttgtaaaagacagaatttcggtggtg           |
| Mpmv6     | tattaatcctactcttcggaccctgtattctcaaccgcttggtccagtttgtaaaagacagaatttcggtggtg           |
| Mpmv7     | tattaatcctactcttcggaccctgtattctcaaccgcttggtccagtttgtaaaagacagaatttcggtggtg           |
| Mpmv8     | tattaatcctactcttcggaccctgtattctcaaccgcttggtccagtttgtaaaagacagaatttcggtggtg           |
| Mpmv9     | tattaatcctactcttcggaccctgtattctcaaccgcttggtccagtttgtaaaagacagaatttcggtggtg           |

## Xmv (concatenated *gag*, *pol* and *env*)

|          |                                                                                    |
|----------|------------------------------------------------------------------------------------|
| XMV_CONS | ATGGGACAGACCGTAACYACYCCTYTGAGTCTRACCTDSARCACTGGGGAGAYGTCCAGCGCATTGCRTCCAAYCAGTC    |
| Xmv10    | atgggacagaccgtaacCacTcctTtgagctGaccCtAGaAactgggggagaCgtccagcgcatTgcGtccaaCcagtc    |
| Xmv12    | atgggacagaccgtaacTaccCctCtgagctAaccTtGCaGcactgggggagaTgtccagcgcatTgcAtccaaTcagtc   |
| Xmv13    | atgggacagaccgtaacCacTcctTtgagctGaccCtAGaAactgggggagaCgtccagcgcatTgcGtccaaCcagtc    |
| Xmv15    | atgggacagaccgtaacTaccCctCtgagctAaccTtGCaGcactgggggagaTgtccagcgcatTgcAtccaaTcagtc   |
| Xmv16    | -----                                                                              |
| Xmv17    | atgggacagaccgtaacTaccCctCtgagctAaccTtGCaGcactgggggagaTgtccagcgcatTgcAtccaaTcagtc   |
| Xmv18    | atgggacagaccgtaacTaccCctCtgagctAaccTtGCaGcactgggggagaTgtccagcgcatTgcAtccaaTcagtc   |
| Xmv19    | -----                                                                              |
| Xmv41    | atgggacagacTgttaacCacTcctTtgagCctGaccCtTGAaactgggggagaCgtccagcgcatTgcGtccaaCcagtc  |
| Xmv42    | atgggacagaccgtaacTaccCctCtgagctAaccTtGCaGcactgggggagaTgtccagcgcatTgcAtccaaTcagtc   |
| Xmv43    | atgggacagaccgtaacCacCctCtgagctGaccCtAGaAactgggggagaCgtccagcgcatCgcGtccaaCcagtc     |
| Xmv8     | atgggacagaccgtaacCacTcctTtgagctGaccCtAGaAactgggggagaCgtccagcgcatTgcGtccaaCcagtc    |
| Xmv9     | atgggGcagaccgtaacCacTcctTtgagCctGaccCtAGaAactgggggagaCgtccagcgcatTgcGtccaaCcagtc   |
| XMV_CONS | YGTGGAYGTCAAGAAGRCGCTGGGTYACCTTCTGYTCYCCGARTGGCCAACCTTCAATGTGGGRTGGCCDCARGATG      |
| Xmv10    | CgtggaCgtcaAgaagagAcgTtgggtCacctctgCtcTgccgaGtggccaactttcGatgtgggGtggccGcaAgatg    |
| Xmv12    | TgtggaTgtcaGgaagagGcgtgggtTaccctctgTtcCgccgaAtggccaactttcaatgtgggAtggccTcaGgatg    |
| Xmv13    | CgtggaCgtcaAgaagagAcgTtgggtCacctctgCtcTgccgaAtggccaactttcaatgtgggAtggccTcaGgatg    |
| Xmv15    | TgtggaTgtcaGgaagagGcgtgggtTaccctctgTtcCgccgaAtggccaactttcaatgtgggAtggccTcaGgatg    |
| Xmv16    | -----                                                                              |
| Xmv17    | TgtggaTgtcaGgaagagGcgtgggtTaccctctgTtcCgccgaAtggccaactttcaatgtgggAtggccTcaGgatg    |
| Xmv18    | TgtggaTgtcaGgaagagGcgtgggtTaccctctgTtcCgccgaAtggccaactttcaatgtgggAtggccTcaGgatg    |
| Xmv19    | -----                                                                              |
| Xmv41    | CgtggaCgtcaAgaagagAcgctgggtCacctctgCtcTgccgaGtggccaactttcGatgtgggGtggccAcaAgatg    |
| Xmv42    | TgtggaTgtcaGgaagagGcgtgggtTaccctctgTtcCgccgaAtggccaactttcaatgtgggAtggccTcaGgatg    |
| Xmv43    | CgtggaCgtcaAgaagagAcgctgggtCacctctgCtcTgccgaGtggccaactttcGGTgtAggGtggccGcaAgatg    |
| Xmv8     | CgtggaCgtcaAgaagagAcgTtgggtCacctctgCtcTgccgaGtggccaactttcaatgtgggGtggccGcaAgatg    |
| Xmv9     | CgtggaCgtcaAgaagagAATtgggtCacctctgCtcTgccgaGtggccaactttcGatgtgggGtggccGcaAgatg     |
| XMV_CONS | GTACTTTTAATTTTGRYATTATYTYWCAGGTYAARTCTARRGTGTTTSTCCYGGTCCCCACGGACACCCGGATCAGGTC    |
| Xmv10    | gtacttttaatttGgACattatTtTACaggtTaaAtctaAGgtgtTtCtCccCgggtccccacggacacccggatcagggtc |
| Xmv12    | gtacttttaatttAgGTattatCtCTcaggtCaaGtctaGAggtgtTtGtccTgggtccccacggacacccggatcagggtc |
| Xmv13    | gtacttttaatttGgACattatTtTACaggtTaaAtctaAGgtgtTtCtCccCgggtccccacggacacccggatcagggtc |
| Xmv15    | gtacttttaatttAgGTattatCtCTcaggtCaaGtctaGAggtgtTtGtccTgggtccccacggacacccggatcagggtc |
| Xmv16    | -----                                                                              |
| Xmv17    | gtacttttaatttAgGTattatCtCTcaggtCaaGtctaGAggtgtTtGtccTgggtccccacggacacccggatcagggtc |
| Xmv18    | gtacttttaatttAgGTattatCtCTcaggtCaaGtctaGAggtgtTtGtccTgggtccccacggacacccggatcagggtc |
| Xmv19    | -----                                                                              |
| Xmv41    | gtacttttaatttAgACatCatTtCACaggtTaaAtctaAGgtgtTtCtCccCgggtccccacggacacccggatcagggtc |
| Xmv42    | gtacttttaatttAgGTattatCtCTcaggtCaaGtctaGAggtgtTtGtccTgggtccccacggacacccggatcagggtc |
| Xmv43    | gtacttttaatttGgACattatTtTACaggtTaaAtctaAGgtgtTtCtCccCgggtccccacggacacccggatcagggtc |
| Xmv8     | gtacttttaatttGgACattatTtTACaggtTaaAtctaAGgtAttCtCccCgggtccccacggacacccggatcagggtc  |
| Xmv9     | gtacttttaatttGgACattatTtTACaggtTaaAtctaAGgtgtTtCtCccCgggtccccacggacacccggatcagggtc |
| XMV_CONS | CCATAYATYGTACCTGGGAGGCACCTTGCCTATGACCCCCCTCCGTGGGTCAAACCGTTTGTCTCTCCAAAACCCCTCC    |
| Xmv10    | ccataCatTgtcacctgggaggcacttgccatgacccccctccgtgggtcaaaccgtttgtctctccaaaacccccctcc   |
| Xmv12    | ccataTatCgtcacctgggaggcacttgccatgacccccctccgtgggtcaaaccgtttgtctctccaaaacccccctcc   |
| Xmv13    | ccataCatTgtcacctgggaggcacttgccatgacccccctccgtgggtcaaaccgtttgtctctccaaaacccccctcc   |
| Xmv15    | ccataTatCgtcacctgggaggcacttgccatgacccccctccgtgggtcaaaccgtttgtctctccaaaacccccctcc   |
| Xmv16    | -----                                                                              |
| Xmv17    | ccataTatCgtcacctgggaggcacttgccatgacccccctccgtgggtcaaaccgtttgtctctccaaaacccccctcc   |
| Xmv18    | ccataTatCgtcacctgggaggcacttgccatgacccccctccgtgggtcaGaccgtttgtctctccaaaacccccctcc   |
| Xmv19    | -----                                                                              |
| Xmv41    | ccataCatTgtcacctgggaggcTAttgacctgacccccctccgtgggtcaaaccTtttgtctctccCaaacTcTctcT    |
| Xmv42    | ccataTatCgtcacctgggaggcacttgccatgacccccctccgtgggtcaaaccgtttgtctctccaaaacccccctcc   |
| Xmv43    | ccataCatTgtcacctgggaggcTAttgacctgaAccccctccgtgggtcaaaccTtttgtctctccCaaacTcTcCtT    |
| Xmv8     | ccataCatTgtcacctgggaggcacttgccatgacccccctccgtgggtcaaaccgtttgtctctccaaaacccccctcc   |
| Xmv9     | ccataCatTgtcacctgggaggcacttgccatgacccccctccgtgggtcaaaccgtttgtctctccaaaacccccctcc   |

XMV\_CONS TTTACCGACAGCTCCCGTCTCCGCCCGGTCCTTCTGCGCAACCTCCGTCCCGATCTGCCCTTTACCCTGCCCTTACCC  
 Xmv10 tttaccgacagctcccggtcctccgcccgggtccttctgcgcaacctccgtcccgatctgccctttaccctgcccttacc  
 Xmv12 tttaccgacagctcccggtcctccgcccgggtccttctgcgcaacctccgtcccgatctgccctttaccctgcccttacc  
 Xmv13 Cttaccgacagctcccggtcctccgcccgggtccttctgcgcaacctccgtcccgatctgccctttaccctgcccttacc  
 Xmv15 tttaccgacagctcccggtcctccgcccgggtccttctgcgcaacctccgtcccgatctgccctttaccctgcccttacc  
 Xmv16 -----  
 Xmv17 tttaccgacagctcccggtcctccgcccgggtccttctgcgcaacctccgtcccgatctgccctttaccctgcccttacc  
 Xmv18 tttaccgacagctcccggtcctccgcccgggtccttctgcgcaacctccgtcccgatctgccctttaccctgcccttacc  
 Xmv19 -----  
 Xmv41 CtCTccAacGcgtcccAtcctcccATccggCctttoGAACcaacctccgCcccgatctgccctttaccctgctTcttacc  
 Xmv42 ttCaccgacagctcccggtcctccgcccggAAtccttctgcgcaacctccgtcccgatctgccctttaccctgcccttacc  
 Xmv43 CtCTccAacGcgtcccAtcctcccATccggCctttoGAACcaacctccgCcccgatctgccctttaccctgctTcttacc  
 Xmv8 tttaccgacagctcccggtcctccgcccgggtccttctgcgcaacctccgtcccgatctgccctttaccctgcccttacc  
 Xmv9 tttaccgacagctcccggtcctccgcccgggtccttctgcgcaacctccgtcccgatctgccctttaccctgcccttacc

XMV\_CONS CCTCTATAAAGCCCAAAACCTCCTAAGCCCCAGGTTCTCCCTGATAACGGCGGACCTCTCATTGACCTTCTCACAGAGGAC  
 Xmv10 cctctataaagAccaaacctcctaagccccagggttctcctgataaacggcggaaccGctcattgaccttctcacagaggac  
 Xmv12 cctctataaagcccaaacctcctaagccccagggttctcctgataaacggcggaaccctcattgaccttctcacagaggac  
 Xmv13 cctctataaagTccaaacctcctaagccccagggttctcctgataGggcggaaccctcattgaccttctcacagaggac  
 Xmv15 cctctataaagcccaaacctcctaagccccagggttctcctgataaacggcggaaccctcattgaccttctcacagaggac  
 Xmv16 -----  
 Xmv17 cctctataaagcccaaacctcctaagccccagggttctcctgataaacggcggaaccctcattgaccttctcacagaggac  
 Xmv18 cctctataaagcccaaacctcctaagccccagggttctcctgataaacggcggaaccctcattgaccttctcacagaggac  
 Xmv19 -----ga-  
 Xmv41 cctctataaaaAccaGacctTctaaAccTcaggttctctTCgataaacggcggaaccctcattgaccttctcacagaAgac  
 Xmv42 cctctataaagTccaaacctcctaagccccagggttctcctgataGggcggaaccCctcattgaccttctcacagaggac  
 Xmv43 cctctataaaaAccaGacctTctaaAccTcaggttctctTCgataaTggcggaaccctcattgaccttctcacagaAgac  
 Xmv8 cctctataaagcccaaacctcctaagccccagggttctcctgataGggcggaaccctcattgaccttctcacagaggac  
 Xmv9 cctctataaagcccaaacctcctaagccccagggttctcctgatGGggcggaaccctcattgaccttctcacagaggac

XMV\_CONS CCCCCGCGGTACGGAGCACAA--CCTTCCTCTCTGCCAGAGGGAACGATGAAGAAGAGGCGGCCDCCACCTCCGAGGT  
 Xmv10 cccccgcggtacggagcacaa--ccttctcctctgtgccagaggggaacgatgaagaagaggcgggcGccacctccgaggt  
 Xmv12 cccccgcggtacggagcacaa--ccttctcctctgtgccagaggggaacgatAaagaagaggcgggcAccacctccgaggt  
 Xmv13 cccccgcggtacggagcacaa--ccttctcctctgtgccagagAAaacAatgaagaagaggcgggcGccacctccgaggt  
 Xmv15 cccccgcggtacggagcacaa--ccttctcctctgtgccagaggggaacgatgaagaagaggcgggcAccacctccgaggt  
 Xmv16 -----  
 Xmv17 cccccgcggtacggagcacaa--ccttctcctctgtgccagaggggaacgatAaagaagaggcgggcAccacctccgaggt  
 Xmv18 cccccgcAacggagcacaa--ccttctcctctgtgccagaggggaacgatgaagaagaggcgggcAccaccCccgaggt  
 Xmv19 cccccgcggtacggagcacaa--ccttctcctctgtgccagaggggaacgatgaagaagaggcgggcAccacctccgaggt  
 Xmv41 cdTccgcggtacggagAacaGGGAacGtctcctctgtAcGgagATGGGgaCAGagaagaggcCAccTccacTctTgagA  
 Xmv42 cccccgcggtacAagagcacaa--ccTctcctctgtgccagGgAgaacgaCgaagaagaggcgggcAcc--tccgaggt  
 Xmv43 cdTccgcggtacggagAacaGGGAacGtctcctctgtAcGgagATGGGgaCAGagaagaggcCAccTccacTctTgagA  
 Xmv8 cccccgcggtacggagcacaa--ccttctcctctgtgccagagAAaacAatgaagaagaggcgggcGccacctccgaggt  
 Xmv9 cccccgcggtacggagcacaa--ccttctcctctgtgccagaggggaacgatgaaAaagaggcgggcGccacctccgaggt

XMV\_CONS TTCCCCCCTTCTCCCATGGTGTCTCGACTCGGGGAAGGAGAGACCCTCCCGCAGCGGACTCCACCTCCTCCCAGGCAT  
 Xmv10 ttcccccccttctcccatggtgtctcgactcggggaaggagGgacctccgcagcggactccacctctctccagggcat  
 Xmv12 ttcccccccttctcccatggtgtctcgactcggggaaggagagacctccgcagcggactccacctctctccagggcat  
 Xmv13 ttcccccccttctcccatggtgtctcgactcggggaaggagGgacctccgcagcggactccacctctctccagggcat  
 Xmv15 ttcccccccttctcccatggtgtctcgactcggggaaggagagacctccgcagcggactccacctctctccagggcat  
 Xmv16 -----  
 Xmv17 ttcccccccttctcccatggtgtctcgactcggggaaggagagacctccgcagcggactccacctctctccagggcat  
 Xmv18 ttcccccccttctcccatggtgtctcgactcggggaaggagagacctccgcagcggactccacctctctccagggcat  
 Xmv19 ttcccccccttctcccatggtgtctcgactcggggaaggagagacctccgcagcggactccacctctctccagggcat  
 Xmv41 tCctTGccccCtctcccatggtgtctcgCctcggggCaAAagagacctCccgcGgcAgtTccaccAcctcTcGggcTt  
 Xmv42 ttcccccccttctcccatggtgtctcgactcggggaaggagagacctccgcagTggactccaccAcctccagggcat  
 Xmv43 tCctTGccccCtctcccatggtgtctcgCTtcggggCaAAagagacctCccgcGgcAgtTtccaccAcctcTcGggcTt  
 Xmv8 ttcccccccttctcccatggtgtctcgactcggggaaggagGgacctccgcagcggactccacctctctccagggcat  
 Xmv9 ttcccccccttctcccatggtgtctcgactcggggaaggagGgacctccgcagcggactccacctctctccagggcat

XMV\_CONS TCCCACTCCGCATGGGGGGAGATGGCCAGCTTCAGTAYTGCCGTTTTCCTCCTCGGACTTATATAATTGAAAAATAAT  
 Xmv10 tcccaactccgcataggggggagatggccagcttcagtaTtggccggttttctcctcctcggacttataCaattggaaaaataat  
 Xmv12 tcccaactccgcataggggggagatggccagcttcagtaCtggccggttttctcctcctcA gacttatataaattggaaaaataat  
 Xmv13 tcccaactccgcataggggggagatggccagcttcagtaTtggccggttttctcctcctcggacttataCaattggaaaaataat  
 Xmv15 tcccaactccgcataggggggagatggccagcttcagtaCtggccggttttctcctcctcTgacttatataaattggaaaaataat  
 Xmv16 -----  
 Xmv17 tcccaactccgcataggggggagatggccagcttcagtaCtggccggttttctcctcctcggacttatataaattggaaaaataat  
 Xmv18 tcccaactccgcataggggggagatggccagcttcagtaCtggccggttttctcctcctcTgacttatataaattggaaaaataat  
 Xmv19 tcccaactccgcataggggggagatggccagcttcagtaTtggccggttttctcctcctcA gacttatataaattggaaaaataat  
 Xmv41 tcccaactccgTtTggggggTAatggTcagTtGcagtaCtggccggttttctcctcctcTgaTcTtatataaCtggaaaaataat  
 Xmv42 tTcccaactccgcataggggggagatggccagcttcagtaTtggccggttttctcctcTtccggaTttataCaattggaaaaataat  
 Xmv43 tcccaactccgTtTggggggTAatggTcagTtGcagtaCtggccggttttctcctcctcgggaTcTtatataaCtggaaaaataat  
 Xmv8 tcccaactccgcataggggggagatggccagcttcagtaTtggccggttttctcctcctcggacttataCaattggaaaaataat  
 Xmv9 tcccaactccgcataggggggagatggccagcttcagtaTtggccggttttctcctcTtccgacttataCaattggaaaaataat

XMV\_CONS AACCTTCTCTTTCTGAAGAYCCAGGTAAATTGACGGCCTTGATTGAGTCCGTCCTCATCACCCACCAGCCACCTGGGA  
 Xmv10 aacccttcccttttctgaagaCccaggtaaattgacggccttgattgagtcctcctcatcaccaccagccacctggga  
 Xmv12 aacccttcccttttctgaagaCccaggtaaattgacggccttgattgagtcctcctcatcaccaccagccacctggga  
 Xmv13 aacccttcccttttctgaagaCccaggtaaattgacggccttgattgagtcctcctcatcaccaccagccacctggga  
 Xmv15 aacccttcccttttctgaagaTccaggtaaattgacggccttgattgagtcctcctcatcaccaccagccacctggga  
 Xmv16 -----  
 Xmv17 aacccttcccttttctgaagaTccaggtaaattgacggccttgattgagtcctcctcatcaccaccagccacctggga  
 Xmv18 aacccttcccttttctgaagaCccaggtaaattgacggccttgattgagtcctcctcatcaccaccagccacctggga  
 Xmv19 aacccttcccttttctgaagaCccaggtaaattgacggccttgattgagtcctcctcatcaccaccagccacctggga  
 Xmv41 aaTccttcccttttctgaagaTccaggtaaattgacTgccttAatCgagtcTgtTctcatcacccaTcagccTaccctggga  
 Xmv42 aacccttcccttttctgaagaTccaggtaaattgacggccttgattgagtcctcctcatcaccaccagccacctggga  
 Xmv43 aacccttccctTctctgaagaTccaggtaaattgacTgccttAatCgagtcTgtcctcaCaccaccagccTaccTtggga  
 Xmv8 aacccttcccttttctgaagaTccaggtaaattgacggcTttgattgagtcctcctcatcaccaccagccacctggga  
 Xmv9 aacccttcccttttctgaagaCccaggtaaattgacggcTttgattgagtcctcctcatcaccaccagccacctggga

XMV\_CONS CGACTGTCAGCAGTTGTTGGGGACCTGCTGACCGGAGAAGAAAAGCAGCGGGTGCTCCTAGAGGCTAGAAAGGCAGTCC  
 Xmv10 cgactgtcagcagttgttggggaccctgctgaccggagaagaaaagcagcgggtgctcctagaggctagaaaggcagtc  
 Xmv12 cgactgtcagcagttgttggggaccctgctgaccggagaagaaaagcagcgggtgctcctagaggctagaaaggcagtc  
 Xmv13 cgactgtcagcagttgttAagggaccctgctgaccggagaagaaaagcagcgggtgctcctagaggctagaaaggcagtc  
 Xmv15 cgactgtcagcagttgttggggaccctgctgaccggagaagaaaagcagcgggtgctcctagaggctagaaaggcagtc  
 Xmv16 -----  
 Xmv17 cgactgtcagcagttgttggggaccctgctgaccggagaagaaaagcagcgggtgctcctagaggctagaaaggcagtc  
 Xmv18 cgactgtcagcagttgttggggaccctgctgaccggagaagaaaagcagcgggtgctcctagaggctagaaaggcagtc  
 Xmv19 cgactgtcagcagttgttggggaccctgctgaccggagaagaaaagcagcgggtgctcctagaggctagaaaggcagtc  
 Xmv41 TgactgtcagcagttgCtggggacTctgctgacAggagaGgaGaagcagcgggtgctcctGgaggctagaaaggcagtc  
 Xmv42 cgactgtcagcagttgCtggggaccctgctgaccggagaagaaaagcagcgggtgctcctagaggctagaaaggcagtc  
 Xmv43 TgactgtcaAagttgCtggggacTctgctgacAggagaagaaaagcagcgggtgctcctGgaAgcCagaaaggcagtc  
 Xmv8 cgactgtcagcagttgttAagggaccctgctgaccggagaagaaaagcagcgggtgctcctagaggctagaaaggcagtc  
 Xmv9 cgactgtcagcagttgttggggaccctgctgaccggagaagaaaagcagcgggtgctcctagaggctagaaaggcagtc

XMV\_CONS GGGGCAATGATGGACGCCCCACTCAGTTGCCTAATGAAGTCAATGCTGCTTTTCCCTTGAACGCCCCGATTGGGATTAC  
 Xmv10 ggggcaatgatggacgccccactcagttgcctaataagtgcaatgctgcttttcccttgaacgccccgattgggattac  
 Xmv12 ggggcaatgatggacgccccactcagttgcctaataagtgcaatgctgcttttcccttgaacgccccgattgggattac  
 Xmv13 ggggcaatgatggacgccccactcagttgcctaataagtgcaatgctgcttttcccttgaacgccccgattgggattac  
 Xmv15 ggggcaatgatggacgccccactcagttgcctaataagtgcaatgctgcttttcccttgaacgccccgattgggattac  
 Xmv16 -----  
 Xmv17 ggggcaatgatggacgccccactcagttgcctaataagtgcaatgctgcttttcccttgaacgccccgattgggattac  
 Xmv18 ggggcaatgatggacgccccactcagttgcctaataagtgcaatgctgcttttcccttgaacgccccgattgggattac  
 Xmv19 ggggcaatgatggacgccccactcagttgcctaataagtgcaatgctgcttttcccttgaacgccccgattgggattac  
 Xmv41 ggggcGaCgaCggGcgccccacCagttgccCaaCgaGAtcGaGgcCgcCtttccctCgaacgTccccaCtgggaCtaT  
 Xmv42 ggggcaatgatggacgccccactcagttgcctaataagtgcaatgctgcttttcccttgaacgccccgattgggattac  
 Xmv43 ggggcGaCgatggCcgccccacCcaAttgccCaatgaGAtcGaGgctgcCtttccctCgaacgTccccaCtgggaCtac  
 Xmv8 ggggcaatgatggacgccccactcagttgcctaataagtgcaatgctgcttttcccttgaacgccccgattgggattac  
 Xmv9 ggggcaatgatggacgccccactcagttgcctaataagtgcaatgctgcttttcccttgaacgccccgattgggattac

XMV\_CONS      ACCACTACAGAAGGTAGGAACACCTAGTCCTCTATCGCCAGTTGCTCTTAGCGGGTCTCCAAAACGCGGGCAGGAGCCC  
 Xmv10      accactacagaaggttaggaaccacctagtctctatcgccagttgctcttagcggtctccaaaacgcgggcaggagccc **A**agccc  
 Xmv12      accactacagaaggttaggaaccacctagtctctatcgccagttgctcttagcggtctccaaaacgcgggcaggagccc  
 Xmv13      accactacagaaggttaggaaccacctagtctctatcgccagttgctcttagcggtctccaaaacgcgggcaggagccc **A**agccc  
 Xmv15      accactacagaaggttaggaaccacctagtctctatcgccagttgctcttagcggtctccaaaacgcgggcaggagccc  
 Xmv16      -----  
 Xmv17      accactacagaaggttaggaaccacctagtctctatcgccagttgctcttagcggtctccaaaacgcgggcaggagccc  
 Xmv18      accactacagaaggttaggaaccacctagtctctatcgccagttgctcttagcggtctccaaaacgcgggcaggagccc  
 Xmv19      accactacagaaggttaggaaccacctagtctctatcgccagttgctcttagcggtctccaaaacgcgggcaggagccc  
 Xmv41      accac**CC**T**G**aggttaggaaccacctagt**T**ctctatcgccag**C**tgtctcttagcggtctcca**Gaa****T**gcgggc**C**ggagccc  
 Xmv42      accactacagaaggttaggaaccacctagtctctatcgccagttgctcttagcggtctccaaaacgcgggcaggagccc **A**agccc  
 Xmv43      accac**CCTT****A**Gaggttaggaaccacctagt**T**ctctatcgccag**C**tgtctct**G**cggtctccaaa**T**gcgggcaggagccc  
 Xmv8      accactacagaaggttaggaaccacctagtctctatcgccagttgctcttagcggtctccaaaacgcgggcaggagccc **A**agccc  
 Xmv9      accactacagaaggttaggaaccacctagtctctatcgccagttgctcttagcggtctccaaaacgcgggcaggagccc **A**agccc

XMV\_CONS      CACCAATTTGGCCAAGGTAAAAGGGATAACCCAGGGACCTAATGAGTCTCCCTCAGCCTTTTTAGAGAGACTCAAGGAGG  
 Xmv10      caccaatttggccaaggtaaaagggataaaccagggacctaatgagtctccctcagccttttagagagactcaaggagg  
 Xmv12      caccaatttggccaaggtaaaagggataaaccagggacctaatgagtctccctcagccttttagagagactcaaggagg  
 Xmv13      caccaatttggccaaggtaaaagggataaaccagggacctaatgagtctccctcagccttttagagagactcaaggagg  
 Xmv15      caccaatttggccaaggtaaaagggataaaccagggacctaatgagtctccctcagccttttagagagactcaaggagg  
 Xmv16      -----  
 Xmv17      caccaatttggccaaggtaaaagggataaaccagggacctaat**A**agtctccctcagccttttagagagactcaag**A**agg  
 Xmv18      caccaatttggccaaggtaaaagggataaaccagggacctaatgagtctccctcagccttttagagagactcaaggagg  
 Xmv19      caccaatttggccaaggtaaaagggataaaccagggacctaatgagtctccctcagccttttagagagactcaaggagg  
 Xmv41      caccaatttggccaaggtaaaagggataa**C**cagggacc**Ca**atgagtctccctc**G**ccttttagagagactcaa**A**agg  
 Xmv42      caccaatttggccaaggtaaaagg**A**ataaaccagggacctaatgagtctccctcagccttttagagagactcaaggagg  
 Xmv43      caccaatttggc**T**aaggtaaaagg**A**ataaaccaggg**CT**c**Ca**Cgagt**G**ccctc**G**ccctt**C**tagagagactcaa**A**agg  
 Xmv8      caccaatttggccaaggtaaaagggataaaccagggacctaatgagtctccctcagccttttagagagactcaaggagg  
 Xmv9      caccaatttggccaaggtaaaagggataaaccagggacctaatgagtctccctcagccttttagagagactcaaggagg

XMV\_CONS      CCTATCGCAGGTACACTCCTTATGACCCTGAGGACCCAGGGCAAGAAACCAATGTGTCTATGTCTATCTGGCAGTCT  
 Xmv10      cctatcgaggtacactccttatgacctgaggaccagggaagaaccacatgtgtctatgtcattcatctggcagctct  
 Xmv12      cctatcgaggtacactccttatgacctgaggaccagggaagaaccacatgtgtctatgtcattcatctggcagctct  
 Xmv13      cctatcgaggtacactccttatgacctgaggaccagggaagaaccacatgtgtctatgtcattcatctggcagctct  
 Xmv15      cctatcgaggtacactccttatgacctgaggaccagggaagaaccacatgtgtctatgtcattcatctggcagctct  
 Xmv16      -----  
 Xmv17      cctatcgaggtacactccttatgacctgaggaccagggaagaaccacatgtgtctatgtcattcatctggcagctct  
 Xmv18      cctatcgaggtacactccttatgacctgaggaccagggaagaaccacatgtgtctatgtcattcatctggcagctct  
 Xmv19      cctatcgaggtacactccttatgacctgaggaccagggaagaaccacatgtgtctatgtcattcatctggcagctct  
 Xmv41      cctatcgaggtacactccttatgacctgaggacc**T**gggcaagaaccacatgt**A**tc**C**atgtc**G**tcattcatctggcagtc**C**  
 Xmv42      cctatcgaggtacactccttatgacctgaggaccagggaagaaccacatgtgtctatgtcattcatctggcagctct  
 Xmv43      cctatcgca**A**tacactccttatgacctgaggacc**T**gggcaagaaccacatgt**A**tc**C**atgtc**G**tcattcatctggcagctct  
 Xmv8      cctatcgaggtacactccttatgacctgaggaccagggaagaaccacatgtgtctatgtcattcatctggcagctct  
 Xmv9      c**A**tat**T**gaggtacactccttatgacctgaggaccagggaagaaccacatgtgtctatgtcattcatctggcagctct

XMV\_CONS      GCCCCGATATCGGGCGAAAAGTTAGAGCGGTTAGAAGATTAAAGAGCAAGACCTTAGGAGACTTAGTGAGGGAAGCTGA  
 Xmv10      gccccgatatcgggcgaaaagttagagcgggttagaagatttaaagagcaagaccttaggagacttagtgagggaaagctga  
 Xmv12      gccccgatatcgggcgaaaagttagagcgggttagaaga**C**ttaaagagcaagaccttaggagacttagtgagggaaagctga  
 Xmv13      gccccgatatcgggcgaaaagttagagcgggttagaagatttaaagagcaagaccttaggaga**T**tttagtgagggaaagctga  
 Xmv15      gccccgatatcgggcgaaaagttagagcgggttagaagatttaaagagcaagaccttaggagacttagtgagggaaagctga  
 Xmv16      -----  
 Xmv17      gccccgatatcgggcgaaaagttagagcgggttagaagatttaaagagcaagaccttaggagacttagtgagggaaagctga  
 Xmv18      gccccgatatcgggcgaaaagttagagcgggttagaaga**C**ttaaagagcaagaccttaggagacttagtgagggaaagctga  
 Xmv19      gccccgatatcgggcgaaaagttagagcgggttagaagatttaaagagcaagaccttaggagacttagtgagggaaagctga  
 Xmv41      g**C**t**T**cc**A**ga**C**at**T**gg**T**c**G**aggttagagcgggttagaaga**C**ttaaa**A**agcaa**A**accttagg**G**gacttagtgag**A**gaagc**C**ga  
 Xmv42      gccccgatatcgggcgaaaagttagagcgggttagaagatttaaagagcaagac**T**tttaggagacttagtgagggaaagctga  
 Xmv43      g**C**t**T**cc**A**ga**C**at**T**gg**T**cgaaggttagagcgggttagaaga**C**ttaaa**A****A**Taagaccttagg**G**gacttagtgag**A**gaagc**A**ga  
 Xmv8      gccccgatatcgggcgaaaagttagagcgggttagaagatttaaagagcaagaccttaggaga**T**tttagtgagggaaagctga  
 Xmv9      gcccc**A**gatatcgggcgaaaagttagagcgggttagaagatttaaagagcaagac**A**ttaggaga**T**tttagtgagggaaagctga

XMV\_CONS AAGGATCTTTAATAAGCGAGAAACCCCGGAAGAAAGAGAGGAACGTATCAGGAGAGAAACAGAGGAAAAAGAAGAACGCC  
 Xmv10 aaggatctttaataagcgagaaaccccggaagaaagagaggaacgtatcaggagagaaacagaggaaaaagaagaacgcc  
 Xmv12 aaggatctttaataagcgagaaaccccggaagaaagagaggaacgtatcaggagagaaacagaggaaaaagaagaacgcc  
 Xmv13 aaAgatctttaataagcgagaaaccccggaagaaagagaggaacgtatcaggagagaaacagaggaaaaagaagaacgcc  
 Xmv15 aaggatctttaataagcgagaaaccccggaagaaagagaggaacgtatcaggagagaaacagaggaaaaagaagaacgcc  
 Xmv16 -----  
 Xmv17 aaggatctttaataagcgagaaaccccggaagaaagagaggaacgtatcaggagagaaacagaggaaaaagaagaacgcc  
 Xmv18 aaggatctttaataagcgagaaaccccggaagaaagagaggaacgtatcaggagagaaacagaggaaaaagaagaacgcc  
 Xmv19 aaggatctttaataagcgagaaaccccggaagaaagagaggaacgtatcaggagagaaacagaggaaaaagaagaacgcc  
 Xmv41 GaggatctttaataaAcgagaaaccccggaagaaagagagAgaacgtatcaggagagaaacagaggaaaaagaagaGcgcc  
 Xmv42 aaAgatctttaataagcgagaaaccccggaagaaagagaggaacgtatcaggagagaaacCgaggaaaGagaagaacgcc  
 Xmv43 aaggatctttaataagAgagaGaccccAgaagaGagagaAgaacgtatTAagagagaaacagaggaaaaagaGgaGcgcc  
 Xmv8 aaAgatctttaataagcgagaaaccccggaagaaagagaggaacgtatcaggagagaaacagaggaaaaagaagaacgcc  
 Xmv9 aaAgatctttaataagcgagaaaccccggaagaaagagaggaacgtatcaggagagaaacagaggaaaaGgaagaacgcc

XMV\_CONS GTAGGGCAGAGGATGAGCAGAGAGAGAAAGAAAGGGACCGCAGAAGACATAGAGAGATGAGCAAGCTCTTGGCCACTGTA  
 Xmv10 gtagggcagaggatgagcagagagagaaagaaagggaccgcagaagacatagagagatgagcaagctcttggccactgta  
 Xmv12 gtagggcagaggatgagcagagagagaaagaaagggaccgcagaagacatagagagatgagcaagctcttggccactgta  
 Xmv13 gtagggcagaggatgagcagagagagaaagaaagggaccgcagGagacatagagagatgagcaagctcttggccactgta  
 Xmv15 gtagggcagaggatgagcagagagagaaagaaagggaccgcagaagacatagagagatgagcaagctcttggccactgta  
 Xmv16 -----  
 Xmv17 gtagggcagaggatgagcagagagagaaagaaagggaccgcagaagacatagagagatgagcaagctcttggccactgta  
 Xmv18 gtagggcagaggatgagcagagagagaaagaaagggaccgcagaagacatagagagatgagcaagctcttggccactgta  
 Xmv19 gtagggcagaggatgagcagagagagaaagaaagggaccgcagaagacatagagagatgagcaagctcttggccactgta  
 Xmv41 gtagggcagaggatgagcagagagaAaagaaagggaccgcagaagacaAagaAAAtgagcaagctAttggccactgta  
 Xmv42 gtagggcagagAgatgagcagagagagaaagaaagggaccgcagaagacatagagagatgagcaagctcttggccactgta  
 Xmv43 gtagggcagaggatgagcagaAagagaaagaGagggaccgcagaagacaGagagaAAtgagcaaAAtcttggccacCgta  
 Xmv8 gtagggcagaggatgagcagagagagaaagaaagggaccgcagGagacatagagaAAtgagcaagctcttggccactgta  
 Xmv9 gtagggcagaggatgagcagagagagaaagaaagggaccgcagGagacatagagagatgagcaagctcttggccactgtG

XMV\_CONS GTTANTGGTCAGAGACAGGATAGACAGGGGGGAGAGCGRAGGAGGCCCAACTTGATAAGGACCAATGCGCCTACTGCAA  
 Xmv10 gttATtggtcagagacaggatagacaggggggagagcgGaggaggccccaacttgataaggaccaatgcgccactactgcaa  
 Xmv12 gttATtggtcagagacaggatagacaggggggagagcgGaggaggccccaacttgataaggaccaatgcgccactactgcaa  
 Xmv13 gttAGtggACagagacaggatagacaggggggagagcgAaggaggccccaacttgataaggaccaatgcgccactactgcaa  
 Xmv15 gttATtggtcagagacaggatagacaggggggagagcgAaggaggccccaacttgataaggaccaatgcgccactactgcaa  
 Xmv16 -----ggaggccccaGcGAgataaggaccaatgcgccactactgcaa  
 Xmv17 gttATtggtcagagacaggatagacaggggggagagcgGaggaggccccaacttgataaggaccaatgcgccactactgcaa  
 Xmv18 gttATtggtcagagacaggatagacaggggggagagcgGaggaggccccaacttgataaggaccaatgcgccactactgcaa  
 Xmv19 gttATtggtcagagGcaggatagacaggggggagagcgGaggaggccccaacttgataaggaccaatgcgccactactgcaa  
 Xmv41 gttACtggtcagagacaggatagacaggggggagagcgAaggaggccccaactCgataaggaccaatgcgccactactgcaa  
 Xmv42 gttATtggtcagagacaggatagacaggggggagagcgGaggaggccccaacttgataaggaccaatgcgccactactgcaa  
 Xmv43 gttACAgttcagagacaggatagacaggggggagagcgAaggaggccccaactCgataaggaccaatgcgccactactgcaa  
 Xmv8 gttAGtggACagagacaggatagacaggggggagagcgAaggaggccccaacttgataaggaccaatgcgccactactgcaa  
 Xmv9 gttAGtggACagagacaggatagacaggggggagagcgAaggaggccccaacttgataaggaccaatgcgccactactgcaa

XMV\_CONS AGAAAAGGGACACTGGGCTAAGGACTGCCCAAAGAAGCCACGAGGGCCCCGAGGACCGAGGCCCCAGACCTCCCTCCTGA  
 Xmv10 agaaaagggacactgggctaaggactgcccaaagaagccacgaggggccccgaggaccgaggccccagacctccctcctga  
 Xmv12 agaaaagggacactgggctaaggactgcccaaagaagccacgaggggccccgaggaccgaggccccagacctccctcctga  
 Xmv13 agaaaagggacactgggctaaggactgcccaaagaagccacgaggggccccgaggaccgaggccccagacctccctcctga  
 Xmv15 agaaaagggacactgggctaaggactgcccaaagaagccacgaggggccccgaggaccgaggccccagacctccctcctga  
 Xmv16 agaaaagggacactgggctaaggactgcccaaagaagccacgaggggccccgaggaccgaggccccagacctccctcctga  
 Xmv17 agaaaagggacactgggctaaggactgcccaaagaagccacgaggggccccgaggaccgaggccccagacctccctcctga  
 Xmv18 agaaaagggacactgggctaaggactgcccaaagaagccacgaggggccccgaggaccgaggccccagacctccctcctga  
 Xmv19 agaaaagggacactgggctaaggactgcccaaagaagccacgaggggccccgaggaccgaggccccagacctccctcctga  
 Xmv41 agaaaagggacactgggctaaggatTtgcccaaagaagccacGggggccccgaggaccgaggccccagacctccctcctga  
 Xmv42 agaaaagggacactgggctaaggactTtgcccaaagaagccacgaggggccccgaggaccgaggccccagacctccctcctga  
 Xmv43 agaaaagggacactgggctaGggaTtgcccaaagaagccacGggggccccgaggaccgaggccccagacctccctcctga  
 Xmv8 GgaaaagggacactgggctaaggactTtgcccaaagaagccacgaggggccccgaggaccgaggccccagacctccctcctga  
 Xmv9 agaaaagggacactgggctaaggactTtgcccaaagaagccacgaggggccccgaggaccgaggccccagacctccctcctga

XMV\_CONS CCTTAGGTGACGCTCAGGTTGTGGGACCAATGGGACAGCCCTGCAAGTGCTGACCCCTAAACATAGARGATGAGTATCGG  
 Xmv10 ccttaggtgac-----  
 Xmv12 ccttaggtgacgctcaggttgtgggaccaatgggacagccctgcaagtgtctgacctaaacatagaAgatgagtatcgg  
 Xmv13 ccttaggtgacgctcaggttgtgggaccaatgggacagccctgcaagtgtctgacctaaacatagaGgatgagtatcgg  
 Xmv15 ccttaggtgacgctcaggttgtgggaccaatgggacagccctgcaagtgtctgacctaaacatagaAgatgagtatcgg  
 Xmv16 ccttaggtgacgctcaggttgtgggaccaatgggacagccctgcaagtgtctgacctaaacatagaGgatgagtatcgg  
 Xmv17 ccttaggtgac-----  
 Xmv18 ccttaggtgacgctcaggttgtgggaccaatgggacGgcccctgcaagtgtctgacctaaacatagaAgatgagtatcgg  
 Xmv19 ccttaggtgacgctcaggttgtgggaccaatgggGcagccctgcaCgtgtctgacctaaacatagaAgatgagtatcgg  
 Xmv41 ccCtagAgtgacgctcaggttgtgggaccaAAggacagccctAcaGgtActgacctaaGcatagaGgatgagtatcgg  
 Xmv42 ccttaggtgacgctcaggttgtgggaccaatgggacagccctgcaagtgtctgacctaaacatagaAgatgagtatcgg  
 Xmv43 ccCtagAgtgacgctcaggttgtgggaccaAAggacagccctgcaGgtgtTtgacctTGGcatagaGgatgagtatcgg  
 Xmv8 ccttaggtgacgctcaggttgtgggaccGatgggacagccctgcaagtgtctgacctaaacatagaGgatgagtatcgg  
 Xmv9 ccttaggtgacgctcaggttgtgggaccaatgggacagccctgcaagtgtctgacctaaacatagaGgatgagtatcgg

XMV\_CONS CTACATGAGACCTCAAMAGAGCCGGATGTTTCTCTAGGGTCCACMTGGCTTTCTGATTTTCCCCAGGCCCTGGGCAGAAAA  
 Xmv10 -----  
 Xmv12 ctacatgagacctcaaAagagccggatgtttctctaggggtccacAtggctttctgattttccccaggcctgggcagaaaa  
 Xmv13 ctacatgagacctcaaCagagccggatgtttctctaggggtccacCtggctttctgattttccccaggcctgggcGgaaac  
 Xmv15 ctacatgagacctcaaAagagccggatgtttctctaggggtccacAtggctttctgattttccccaggcctgggcagaaaa  
 Xmv16 ctacatgagacctcaaCagagccggatgtttctctaggggtccacCtggctttctgattttccccaggcctgggcGgaaac  
 Xmv17 -----  
 Xmv18 ctacatgagacctcaaAagagccggatgtttctctaggggtccacAtggctttctgattttccccaggcctgggcagaaaa  
 Xmv19 ctacatgagacctcaaAagagccggatgtttctctaggggtAacAtggctttctgattttccccaggcctgggcagaaaa  
 Xmv41 ctacatgagacctcaaCagagccggatgtttctctaggggtccacCtggctttctgaCtttccccaggcctgggcagaaaa  
 Xmv42 ctacatgagacctcaaAagagccggatgtttctctaggggtccacAtggctttctgattttccccaggcctgggcagaaaa  
 Xmv43 ctacatgagacctcaaCagagccggatgtttctctaggggtccacCtggctttctgaCtttccccaggcctgggcagaaaa  
 Xmv8 ctacatgagacctcaaCagagccggatgtttctctaggggtccacCtggctttctgattttccccaggcctgggcGgaaac  
 Xmv9 ctacatgagacctcaaCagagccggatgtttctctaggggtccacCtggctttctgattttccccaggcctgggcGgaaac

XMV\_CONS CGGGGGCATGGGACTGGCAGTTCGCCAAGCGCCTCTGATTATACCTCTAAAGGCAACCTCYACCCCBGTGTCCATAAAAC  
 Xmv10 -----  
 Xmv12 cgggggcatgggactggcagttcgccaagcgccctctgattataacctctaaaggcaacctcTaccocCgtgtccataaaac  
 Xmv13 cgggggcatgggactggcagttcgccaagcgccctctgattataacctctaaaggcaacctcCaccocTgtgtccataaaac  
 Xmv15 cgggggcatgggactggcagttcgccaagcgccctctgattataacctctaaaggcaacctcTaccocCgtgtccataaaac  
 Xmv16 cgggggcatgggactggcagttcgccaagcgccctctgattataacctctaaaggcaacctcCaccocTgtgtccataaaac  
 Xmv17 -----  
 Xmv18 cgggggcatgggactggcagttcgccaagcgccctctgattataacctctaaaggcaacctcTaccocCgtgtccataaaac  
 Xmv19 cgggggcatgggactggcagttcgccaagcgccctctgattataacctctaaaggcaacctcTaccocCgtgtccataaaac  
 Xmv41 cgggggcatcAgtgactggcagttcgccaagcgccCctgattataacctctaaaggcaacctcCaccocTgtgtccatCaaac  
 Xmv42 cgggggcatgggactggcagttcgccaagcTcctctgatCataacctctGaaggcaacctcTaccocCgtgtccataaaac  
 Xmv43 cgggggcatgggactggcagttcgccaagcgccctctgattataacctctaaaggcaacctcCaccocTgtgtccatCaaac  
 Xmv8 TgggggcatgggactggcagttcgccaagcgccctctgattataacctctGaaggcaacctcCaccocTgtgtccataaaac  
 Xmv9 TgggggcatgggactggcagttcgccaagcgccctctgattataacctctGaaggcaacctcCaccocCgtgtccataaaac

XMV\_CONS AATACCCCATGTACAGGAAGCCAGACTGGGGATCAAGCCCCACATACAGAGGCTGTGGACCAGGGAATACTGGTACCC  
 Xmv10 -----  
 Xmv12 aatacccatgtcacaggaagccagactggggatcaagccccacatacagaggctgttggaccagggaatactgggtacc  
 Xmv13 aatacccatgtcGcaAgaagccagactggggatcaagccccacatacagaggctgttggaccagggaataTtgggtacc  
 Xmv15 aatacccatgtcacaggaagccagactggggatcaagccccacatacagaggctgttggaccagggaatactgggtacc  
 Xmv16 aatacccatgtcGcaAgaagccagactggggatcaagccccacatacagaggctgttggaccagggaataTtgggtacc  
 Xmv17 -----  
 Xmv18 aatacccatgtcacaggaagccagactggggatcaagccccacatacagaggctgttggaccagggaatactgggtacc  
 Xmv19 aatacccatgtcacaggaagccagactggggatcaagccccacatacagaggctgttggaccagggaatactgAtacc  
 Xmv41 aatacccatgtcacAgaagccagactggggatcaagccccacatacagagActgttggaccagggaataTtgggtaccT  
 Xmv42 aatacccatgtcacaggaagccagactggggatcaagccccacatacagaggctgttggaccagggaatactgggtacc  
 Xmv43 aGtaccatgtcacAgaagccagactggggatcaagccccacatacagagActgttggaccagggaataTtgggtaccT  
 Xmv8 aatacccatgtcacaggaagccagactggggatcaagccccacatacagaggctgttggaccagggaatactgggtacc  
 Xmv9 aatacccatgtcacaggaagccagactggggatcaagccccacatacagaggctgttggaccagggaatactgggtacc

XMV\_CONS TGCCAGTCCCCCTGGAACACRCCCCTGCTACCCGTTAAGAAACCAGGGACTAATGATTACAGGCCTGTCCAGGATCTGAG  
 Xmv10 -----  
 Xmv12 tgccagtcacctggaacacGccccctgctaccggttaagaaccagggaactaatgattacaggcctgtccaggatctgag  
 Xmv13 tgccagtcacctggaacacTaccctctgctaccggttaagaaccagggaactaatgattacaggcctgtccaggatctgag  
 Xmv15 tgccagtcacctggaacacGccccctgctaccggttaagaaccagggaactaatgattacaggcctgtccaggatctgag  
 Xmv16 tgccagtcacctggaacacTaccctctgctaccggttaagaaccagggaactaatgattacaggcctgtccaggatctgag  
 Xmv17 -----  
 Xmv18 tgccagtcacctggaacacGccccctgctaccggttaagaaccagggaactaatgattacaggcctgtccaggatctgag  
 Xmv19 tgccagtcacctggaacacGccccctgctaccggttaagaaccagggaactaatgattacaggcctgtccaggatctgag  
 Xmv41 tgccagtcacctggaacacAccctctgctGcccccttaagaaccagggaactaatgattacaggcctgtccaggatctgag  
 Xmv42 tgccagtcacctggaacacGccccctgctaccggttaagaaccagggaactaatgattacaggcctgtccaggatctgag  
 Xmv43 tgccagtcacctggaacacAccctctgctGcccccttaagaaccagggaactaatgattacaggcctgtccaggatctgag  
 Xmv8 tgccagtcacctggaacacGccccctgctaccggttaagaaccagggaactaatgattacaggcctgtccaggatctgag  
 Xmv9 tgccagtcacctggaacTaccctctgctaccggttaagaaccagggaactaaCgattaTaggcctgtccaggatctgag  
  
 XMV\_CONS AGAAGTCAACAAGCGGGTGGGAAGACATCCACCCACCGTGCCCAACCCTTACAACCTCTTTRAGYGGGCTCCCACCGTCCC  
 Xmv10 -----  
 Xmv12 agaagtcacaagcggtggaagacatccacccaccgtgcccacccttacaacctcttGagCgggctcccaccgtccc  
 Xmv13 agaagtcacaagcggtggaagacatccacccaccgtgcccacccttacaacctcttAagTgggctcccaccgtccc  
 Xmv15 agaagtcacaagcggtggaagacatccacccaccgtgcccacccttacaacctcttGagCgggctcccaccgtccc  
 Xmv16 agaagtcacaagcggtggaagacatccacccaccgtgcccacccttacaacctcttAagTgggctcccaccgtccc  
 Xmv17 -----  
 Xmv18 agaagtcacaagcggtggaagacatccacccaccgtgcccacccttacaacctcttGagCgggctcccaccgtccc  
 Xmv19 agaagtcacaagcggtggaagacatccacccaccgtgcccacccttacaacctcttGagCgggctcccaccgtccc  
 Xmv41 agaagtcacaagcggtggaagacatccacccaccgtgcccacccttacaacctcttAagTggActcccTccgtccc  
 Xmv42 agaagtcacaagcggtggaagacatccacccaccgtgcccacccttacaacctcttGagCgggctcccaccgtccc  
 Xmv43 agaagtcacaagcggtggaagacatccacccaccgtgcccacccttacaacctcttAagTggActcccTccgtccc  
 Xmv8 agaagtcacaagcAagtggaagacatccacccaccgtgcccacccttacaacctcttGagCgggctcccaccgtccc  
 Xmv9 agaagtcacaagcggtggaagacatccacccaccgtgcccacccttacaacctcttAagTgggctcccaccActccc  
  
 XMV\_CONS ACCAGTGGTACACTGTGCTTGATTAAAGGATGCCTTTTTCTGCCTGAGACTCCACCCACCACTCAGCCTCTCTTCGCC  
 Xmv10 -----  
 Xmv12 accagtgggtacactgtgcttgatttaaaggatgcctttttctgctgagactccacccaccagtcagcctctcttcgcc  
 Xmv13 accagtgggtacactgtgcttgatttaaaggatgcctttttctgctgagactccacccaccagtcagcctctcttcgcc  
 Xmv15 accagtgggtacactgtgcttgatttaaaggatgcctttttctgctgagactccacccaccagtcagcctctcttcgcc  
 Xmv16 accagtgggtacactgtgcttgatttaaaggatgcctttttctgctgagactccacccaccagtcagcctctcttcgcc  
 Xmv17 -----  
 Xmv18 accagtgggtacactgtgcttgatttaaaggatgcctttttctgctgagactccacccaccagtcagcctctcttcgcc  
 Xmv19 accagtgggtacactgtgcttgatttaaaggatgcctttttctgctgagactccacccaccagtcagcctctcttcgcc  
 Xmv41 accagtgggtacactgtgctCgatttaaaAagtgctttttctgctgagactccacccaccagtcagcctctcttcgcc  
 Xmv42 accagtgggtacactgtgcttgatttaaaggatgcctttttctgctgagactccacccaccagtcagcctctcttcgcc  
 Xmv43 accagtgggtacactgtgcttgatttaaaAagtgctttttctgctgagactccacccaccagtcagcctctcttcgcc  
 Xmv8 accagtgggtacactgtgcttgatttaaaggatgcctttttctgctgagactccacccaccagtcagcctctcttcgcc  
 Xmv9 accagtgggtActgtgcttgatttaaaggatgcctttttctgctgagactccacccaccagtcagcctctcttcgcc  
  
 XMV\_CONS TTTGAGTGGAGAGATCCAGGGATGGGAATCTCAGGACAATTGACCTGGACCAGACTCCCACAGGGTTTCAAAAACAGTCC  
 Xmv10 -----  
 Xmv12 tttgagtggagagatccagggatgggaatctcaggacaattgacctggaccagactcccacaggggtttcaaaaacagtcc  
 Xmv13 tttgagtggagagatccagggatgggaatctcaggacaattgacctggaccagactcccacaggggtttcaaaaacagtcc  
 Xmv15 tttgagtggagagatccagggatgggaatctcaggacaattgacctggaccagactcccacaggggtttcaaaaacagtcc  
 Xmv16 tttgagtggagagatccagggatgggaatctcaggacaattgacctggaccagactcccacaggggtttcaaaaacagtcc  
 Xmv17 -----  
 Xmv18 tttgagtggagagatccagggatgggaatctcaggacaattgacctggaccagactcccacaggggtttcaaaaacagtcc  
 Xmv19 tttgagtggagagatccagAagtggaatctcaggacaattgacctggaccagactcccacaggggtttcaaaaacagtcc  
 Xmv41 tttgagtggagagatccagAAatgggaatctcTggGcaattgacctAgaccagactcccacaggggtttcaaaaacagtcc  
 Xmv42 tttgagtggagagatccagggatgggaatctcaggacaattgacctggaccagactcccacaggggtttcaaaaacagtcc  
 Xmv43 tttgagtggagagatccagAAatgggaatctcTggacaattgacctggaccagactcccacaggggtttcaaaaacagtcc  
 Xmv8 tttgagtggagagatccagggatgggaatctcaggacaattgacctggaccagactcccacaggggtttcaaaaacagtcc  
 Xmv9 tttgagtggagagatccagAAatgggaatctcaggacaattgacctggaccagactcccacaggggtttcaaaaacagtcc

XMV\_CONS CACCCTGTTTGTATGAGGCACCTGCACAGAGACCTAGCAGACTTCCGGATCCAGCACCCAGACTTGATCCTGCTACAGTACG  
 Xmv10 -----  
 Xmv12 caccctgtttgatgaggcactgcacagagacctagcagacttccggatccagcaccagacttgatcctgctacagtacg  
 Xmv13 caccctgtttgatgaggcactgcacagagacctagcagacttccggatccagcaccagacttgatcctgctacagtacg  
 Xmv15 caccctgtttgatgaggcactAacacagagacctagcagacttccggatccagcaccagacttgatcctgctacagtacg  
 Xmv16 caccctgtttgatgaggcactgcacagagacctagcagacttccggatccagcaccagacttgatcctgctacagtacg  
 Xmv17 -----  
 Xmv18 caccctgtttgatgaggcactgcacagagacctagcagacttccggatccagcaccagacttgatcctgctacagtacg  
 Xmv19 caccctgtttgatgaggcactAacacagagacctagcagacttccggatccagcaccagacttgatcctgctacagtacg  
 Xmv41 caccctgtttAatgaggcactgcacagagacctagcagacttccggatccagcaccagacttgatcctgctacagtacg  
 Xmv42 caccctgtttgatgaggcactgcacagagacctagcagacttccggatccagcaccagacttgatcctgctacagtacg  
 Xmv43 caccctgtttgatgaggcactTgcacagagacctagcagacttccggatccagcaccagacttgatcctgctacagtacg  
 Xmv8 caccctgtttgaCgaggcTctgcacagagacctagcCgacttccggatccagcaccagacttgatcctgTcagtagc  
 Xmv9 caccctgtttgaCgaggcTctgcacagagacctagcCgacttccggatccagcaccagacttgatcctgTcagtagc

XMV\_CONS TGGATGACATACTACTGGCCGCCACTTCTGAGCTCGACTGCCAACAAAGGTACTCGGGCCCTDTTACAAACCTTAGGRRAC  
 Xmv10 -----  
 Xmv12 tggatgacatactactggtccgccacttctgagctcgactgccaaacaggtactcgggccctGttacaaacccctaggAAac  
 Xmv13 tggatgacatactactggtccgccacttctgagctcgactgccaaacaggtactcgggccctGttacTaaccctaggAAac  
 Xmv15 tggatgacatactactggtccgccacttctgagctcgactgccaaacaggtactcgggccctGttacaaacccctaggAAac  
 Xmv16 tggatgacatactactggtccgccacttctgagctcgactgccaaacaggtactcgggccctGttacTaaccctaggAAac  
 Xmv17 -----  
 Xmv18 tggatgacatactactggtccgccacttctgagctcgactgccaaacaggtactcgggccctGttacaaacccctaggAAac  
 Xmv19 tggatgacatactactggtccgccacttctgagctcAactgccaaacaggtactcgggccctGttacaaacccctaggAAac  
 Xmv41 tggatgacTtactGctggccgcTacttcCgaActAgactgccaaacaggtactcgggccctACTacaaacccctaggGGac  
 Xmv42 tggatgacatactGctggccgccacttctgagctcgactgccaaacag-----  
 Xmv43 tggatgacTtactGctggccgcTacttcCgaActAgactgccaaacaggtactcgggccctTctacaaacccctaggGGac  
 Xmv8 tAgatgacTtactGctggccgcGacttcCgagcCTgactgccaaacaggtactcGagccctAttacaaacCTtaggGGac  
 Xmv9 tAgatgacTtactactggtccgcGacttcCgagcCTgactgccaaacaggtactcGagccctAttacaaacCTtaggGGac

XMV\_CONS CTCGGRATAYCGGGCCTCGGCCAAGAAAGCCCAACTTTGCCAGAAACAGGTCAAGTATCTGGGGTATCTTCTAAAAGAGGG  
 Xmv10 -----  
 Xmv12 ctccgGtaTcgggcctcggccaagaaagcccaactttgccagaaacaggtcaagtatctgggggatcttctaaaagagggg  
 Xmv13 ctccgGtaTcgggcctcggccaagaaagcccaactttgccagaaGcaggtcaagtatctgggggatcttctaaaagagggg  
 Xmv15 ctccgGtaTcgggcctcggccaagaaagcccaactttgccagaaacaggtcaagtatctgggggatcttctaaaagagggg  
 Xmv16 ctccgGtaTcgggcctcggccaagaaagcccaactttgccagaaGcaggtcaagtatctgggggatcttctaaaagagggg  
 Xmv17 -----  
 Xmv18 ctccgGtaTcgggcctcggccaagaaagcccaactttgccagaaacaggtcaagtatctgggggatcttctaaaagagggg  
 Xmv19 ctccgGtaTcgggcctcggccaagaaagcccaactttgccagaaacaggtcaagtatctgggggatcttctGaaagagggg  
 Xmv41 ctccgAtaCgggcctcggccaagaaagcccaaAtCtgcagaaacaggtTaaAAtaCctgggggaCcttctGaGGgaggg  
 Xmv42 -----  
 Xmv43 ctccgAtaCgggcctcggccaagaaagcccaaAtCtgcagaaacaggtTaaAAtaCctgggggaCcttctGaGGgaggg  
 Xmv8 ctccgAtaCgggcctcggccaagaaagcccaactttgccagaaacaggtcaagtatctgggggatcttctaaaagagggg  
 Xmv9 ctccgAtaCgggcctcggccaagaaagcccaactttgccagaaacaggtcaagtatctgggggatcttctaaaagagggg

XMV\_CONS TCAGAGATGGCTGACTGAGGCCAGAAAAGAGACTGTGATGGGGCAGCCTACTCCGAAGACCCCTCGACAACCTAAGGGAGT  
 Xmv10 -----  
 Xmv12 tcagagatggctgactgaggccagaaaagagactgtgatggggcagcctactccgaagaccctcgacaactaagggagt  
 Xmv13 tcagagatggctgactgaggccagaaaagagactgtgatggggcagcctactccgaagaccctcgacaactaagggagt  
 Xmv15 tcagagatggctgactgaggccagaaaagagactgtgatggggcagcctactccgaagaccctcgacaactaagggagt  
 Xmv16 tcagagatggctgactgaggccagaaaagagactgtgatggggcagcctactccgaagaccctcgacaactaagggagt  
 Xmv17 -----  
 Xmv18 tcagagatggctgactgaggccagaaaagagactgtgatggggcagcctactccgaagaccctcgacaactaagggagt  
 Xmv19 tcagagatggctgactgaggccagaaaagagactgtgatggggcagcctactccgaagaccctcgacaactaagggagt  
 Xmv41 tcagagatggctgactgaggcTtagaaaagagactgtgatggggcAaccGTtccAaagacTcctcgacaactTagggagt  
 Xmv42 -----  
 Xmv43 tcagagatggctgactgaggcTtagaaaagagactgtgatggggcAaccGTtccAaagacTcctcgacaactaagggagt  
 Xmv8 tcagagatggctgactgaggccagaaaagagactgtgatggggcagcctactccgaagaccctcgacaactaagggagt  
 Xmv9 tcagagatggctgactgaggccagaaaagagactgtgatggggcagcctactccgaagaccctcgacaactaagggagt

XMV\_CONS TCCTAGGGACGGCAGGCTTCTGTCGCCTCTGGATCCCTGGGTTTGCGGAAATGGCAGCCCCCTTGTATCCTCTTACCAAA  
 Xmv10 -----  
 Xmv12 tcctagggacggcaggtctctgtcgccctctggatccctgggtttgcggaatggcagcccccttgtatcctcttaccaaa  
 Xmv13 tcctagggacggcaggtctctgtcgccctctggatccctgggtttgcggaatggcagcccccttgtatcctcttaccaaa  
 Xmv15 tcctagggacggcaggtctctgtcgccctctggatccctgggtttgcggaatggcagcccccttgtatcctcttaccaaa  
 Xmv16 tcctagggacggcaggtctctgtcgccctctggatccctgggtttgcggaatggcagcccccttgtatcctcttaccaaa  
 Xmv17 -----  
 Xmv18 tcctagggacggcaggtctctgtcgccctctggatccctgggtttgcggaatggcagcccccttgtatcctcttaccaaa  
 Xmv19 tcctagggacggcaggtctctgtcgccctctggatccctgggtttgcggaatggcagcccccttgtatcctcttaccaaa  
 Xmv41 tcctagggacggcaggtctctgCcgccctctggatccctgggtttgcggaatggcGgcccccttAaCccctctCacaaaa  
 Xmv42 -----  
 Xmv43 tcctagggacggcaggtctctgCcgccctctggatccctgggtttgcggaatggcGgcccccttgtatcctcttaccaaa  
 Xmv9 tcctagggacggcaggtctctgtcgccctctggatccctgggtttgcggaatggcagcccccttgtatcctcttaccaaa

XMV\_CONS ACGGGGACTCTGTTTAATTGGGGCCAGACCAGCAAAAGGCCTATCAAGAAATCAAACAGGCCCTTCTAACTGCCCCCGC  
 Xmv10 -----  
 Xmv12 acggggactctgtttaattggggccagaccagcaaaaggcctatcaagaaatcaaacaggcccttctaactgccccgc  
 Xmv13 acggggactctgtttaattggggccagaccagcaaaaggcctatcaagaaatcaaacaggcccttctaactgccccgc  
 Xmv15 acggggactctgtttaattggggccagaccagcaaaaggcctatcaagaaatcaaacaggcccttctaactgccccgc  
 Xmv16 acggggactctgtttaattggggccagaccagcaaaaggcctatcaagaaatcaaacaggcccttctaactgccccgc  
 Xmv17 -----  
 Xmv18 acggggactctgtttaattggggccagaccagcaaaaggcctatcaagaaatcaaacaggcccttctaactgccccgc  
 Xmv19 acggggactctgtttaattggggccagaccagcaaaaggcctatcaagaaatcaaacaggcccttctaactgccccgc  
 Xmv41 acTgggactctgtttaattggggccagacTcagcaGaGggcctatcaagaaatcaaacaggccctCctGacGgccccTgc  
 Xmv42 -----  
 Xmv43 acggggactctgtttaattggggccagaccagcaaaaggcctatcaagaaatcaaacaggcccttctaactgccccgc  
 Xmv8 acggggactctgtttaattggggccagaccagcaaaaggcctatcaagaaatcaaacaggcccttctaactgccccgc  
 Xmv9 acggggactctgtttaattggggccagaccagcaaaaggcctatcaagaaatcaaacaggcccttctaactgccccgc

XMV\_CONS CCTGGGATTGCCAGATTGACTAAGCCCTTTGAACCTTTTGTGCGACGAGAAGCAGGGCTACGCCAAAGGCGTCTTAACGC  
 Xmv10 -----  
 Xmv12 cctgggattgccagatttgactaagccctttgaactctttgtcgacgagaagcagggctacgccaaaggcgtcctaacgc  
 Xmv13 cctgggattgccagatttgactaagccctttgaactctttgtcgacgagaagcagggctacgccaaaggcgtcctaacgc  
 Xmv15 cctgggattgccagatttgactaagccctttgaactctttgtcgacgagaagcagggctacgccaaaggcgtcctaacgc  
 Xmv16 cctgggattgccagatttgactaagccctttgaactctttgtcgacgagaagcagggctacgccaaaggcgtcctaacgc  
 Xmv17 -----  
 Xmv18 cctgggattgccagatttgactaagccctttgaactctttgtcgacgagaagcagggctacgccaaaggcgtcctaacgc  
 Xmv19 cctgggattgccagatttgactaagccctttgaactctttgtcgacgagaagcagggctacgccaaaggcgtcctaacgc  
 Xmv41 cctgggattgccagaCttgacCaagccctttgaactctttgtcgaTgaAaagcagggctacgccaaaggGgtcctaacgc  
 Xmv42 -----  
 Xmv43 cctgggattgccagatttgactaagccctttgaactctttgtcgacgagaagcagggctacgccaaaggcgtcctaacgc  
 Xmv8 cctgggattgccagatttgactaaAaccctttgaactctttgtcgacgagaagcagggctacgccaaaggcgtcctaacgc  
 Xmv9 cctgggattgccagatttgactaaAaccctttgaactctttgtcgacgagaagcagggctacgccaaaggcgtcctaacgc

XMV\_CONS AAAAAGTGGGACCTTGGCGTGGCCTGTGGCTACCTGTCCAAAAAGCTAGACCCAGTGGCAGCTGGGTGGCCCCCTTGC  
 Xmv10 -----  
 Xmv12 aaaaactgggaccttggcgctggcctgtggcctacctgtccaaaaagctagaccagtggcagctgggtggcccccttgc  
 Xmv13 aaaaactgggaccttggcgctggcctgtggcctacctgtccaaaaagctagaccagtggcagctgggtggcccccttgc  
 Xmv15 aaaaactgggaccttggcgctggcctgtggcctacctgtccaaaaagctagaccagtggcagctgggtggcccccttgc  
 Xmv16 aaaaactgggaccttggcgctggcctgtggcctacctgtccaaaaagctagaccagtggcagctgggtggcccccttgc  
 Xmv17 -----  
 Xmv18 aaaaactgggaccttggcgctggcctgtggcctacctgtccaaaaagctagaccagtggcagctgggtggcccccttgc  
 Xmv19 aaaaactgggaccttggcgctggcctgtggcctacctgtccaaaaagctagaccagtggcagctgggtggcccccttgc  
 Xmv41 aGaaactgggaccttggcgCcgccctgtggcctacctgtccaaaaagctGgaccagtggcagcCgggtggccccctCtgc  
 Xmv42 -----  
 Xmv43 aaaaactgggaccttggcgctggcctgtggcctacctgtccaaaaagctagaccagtggcagcCgggtggcccccttgc  
 Xmv8 aaaaactgggaccttggcgctggcctgtggcctacctgtccaaaaagctagaccagtggcagctgggtggcccccttgc  
 Xmv9 aaaaactgggaccttggcgctggcctgtggcctacctgtccaaaaagctagaccagtggcagctgggtggcccccttgc

XMV\_CONS CTACGGATGGTAGCAGCCATTGCCGTTCTGACAAAAGATGCAGGCAAGCTAACTATGGGACAGCCGCTAGTCATCCTGGC  
 Xmv10 -----catcctggc  
 Xmv12 ctacggatggtagcagccattgccgttctgacaaaagatgcaggcaagctaactatgggacagccgctagtcacatcctggc  
 Xmv13 ctacggatggtagcagccattgccAAttctgacaaaagatgcaggcaagctaactatgggacagccgctagtcacatcctggc  
 Xmv15 ctacggatggtagcagccattgccgttctgacaaaagatgcaggcaagctaactatgggacagccgctagtcacatcctggc  
 Xmv16 ctacggatggtagcagccattgccAAttctgacaaaagatgcaggcaagctaactatgggacagccgctagtcacatcctggc  
 Xmv17 -----  
 Xmv18 ctacggatggtagcagccattgccgttctgacaaaagatgcaggcaagctaactatgggacagccgctagtcacatcctggc  
 Xmv19 ctacggatggtagcagccattgccgttctgacaaaagatgcaggcaagctaactatgggacagccgctagtcacatcctggc  
 Xmv41 TtacggatggtagcagccattgccAAttctgacaaaGgatgcaggcaaAActaacGatgggacagccgctagtcacTctggc  
 Xmv42 -----  
 Xmv43 ctacggatggtagcagccattgccgttctgacaaaagatgcaggcaagctaactatgggacagccgctagtcacatcctggc  
 Xmv8 ctacggatggtagcagccattgccgttTtgatTaaaagatgcaggcaaAActaacatgggacagccgctagtcacatcctggc  
 Xmv9 ctacggatggtagcagccattgccgttctgaTaaaagatgcaggcaagctaactatgggacagccgctagtcacatcctggc

XMV\_CONS CCCCCATGCAGTAGAGGCACTGGTCAAGCAACCCCTGACCGCTGGCTATCCAAYGCCCGCATGACCCACTACCAGGCAA  
 Xmv10 cccccatgcagtagaggcactgggtcaagcaacccctgaccgctggctatccaaTgcccgcgatgaccactaccaggcaa  
 Xmv12 cccccatgcagtagaggcactgggtcaagcaacccctgaccgctggctatccaaCgcccgcgatgaccactaccaggcaa  
 Xmv13 cccccatgcagtagaggcactgggtcaagcaacccctgaccgctggctatccaaTgcccgcgatgaccactaccaggcaa  
 Xmv15 cccccatgcagtagaggcactgggtcaagcaacccctgaccgctggctatccaaCgcccgcgatgaccactaccaggcaa  
 Xmv16 cccccatgcagtagaggcactgggtcaagcaacccctgaccgctggctatccaaTgcccgcgatgaccactaccaggcaa  
 Xmv17 -----  
 Xmv18 cccccatgcagtagaggcactgggtcaagcaacccctgaccgctggctatccaaCgcccgcgatgaccactaccaggcaa  
 Xmv19 cccccatgcagtagaggcactgggtcaagcaacccctgaccgctggctatccaaCgcccgcgatgaccactaccaggcaa  
 Xmv41 cccccatgcGtagaAGcactgggtcaaAcaacccctgaccgTtggtatccaaTgcccgcgatgaccactaTcaggcCa  
 Xmv42 -----  
 Xmv43 cccccatgcagtagaggcactgggtcaagcaacccctgaccgctggctatccaaCgcccgcgatgaccactaccaggcaa  
 Xmv8 cccccatgcagtagaggcactgggtcaagcaacccctgaccgctggctatccaaTgcccgcgatgaccactaccagAcaa  
 Xmv9 cccccatgcagtagaggcactgggtcaagcaacccctgaccgctggctatccaaTgcccgcgatgaccactaccaggcaa

XMV\_CONS TGCTCCTAGACACTGACCGAGTTTCACTTCGGACCACTGGTGGCCCTCAATCCTGCCACCTTGCTCCCTCTACCGGAAAA  
 Xmv10 tgctcctagacactgaccgagttcagttcggaccagtgggtggccctcaatcctgccaccttgctccctctaccggaGaaa  
 Xmv12 tgctcctagacactgaccgagttcagttcggaccagtgggtggccctcaatcctgccaccttgctccctctaccggaAaaa  
 Xmv13 tgctcctagacactgaccgagttcagttcggaccagtgggtggccctcaatcctgccaccttgctccctctaccggaGaaa  
 Xmv15 tgctcctagacactgaccgagttcagttcggaccagtgggtggccctcaatcctgccaccttgctccctctaccggaAaaa  
 Xmv16 tgctcctagacactgaccgagttcagttcggaccagtgggtggccctcaatcctgccaccttgctccctctaccggaGaaa  
 Xmv17 -----  
 Xmv18 tgctcctagacactgaccgagttcagttcggaccagtgggtggccctcaatcctgccaccttgctccctctaccggaAaaa  
 Xmv19 tgctcctagacactgaccgagttcagttcggaccagtgggtggccctcaatcctgccaccttgctccctctaccggaAaaa  
 Xmv41 tgctcctGgaTAcGgaAagGgttcagttcggaccGgtggtGAccctcaaCccGgccaccttgctcccCctaccggaAaaa  
 Xmv42 -----  
 Xmv43 tgctcctagacactgaccgagttcagttcggaccagtgggtggccctcaatcctgccaccttgctccctctaccggaAaaa  
 Xmv8 tgctcctagacactgaccgagttcagttcggaccagtgggtggccctcaatcctgccaccttgctccctctaccggaGaaa  
 Xmv9 tgctcctagacactgaccgagttcagttcggaccagtgggtggccctcaatcctgccaccttgctccctctaccggaGaaa

XMV\_CONS GGAGCCCCCATGATTGCCTCGAGATCTTGCTGAAACGCATGGAACAGACCGGAYCTCACCGACAGCCCATCCAGA  
 Xmv10 ggagcccccatgattgcctcgagatcttggtgaaacgcgatggaaccagaccggaCctcaccgaccagcccatccaga  
 Xmv12 ggagcccccatgattgcctcgagatcttggtgaaacgcgatggaaccagaccggaTctcaccgaccagcccatccaga  
 Xmv13 ggagcccccatgattgcctcgagatcttggtgaaacgcgatggaaccagaccggaCctcaccgaccagcccatccaga  
 Xmv15 ggagcccccatgattgcctcgagatcttggtgaaacgcgatggaaccagaccggaTctcaccgaccagcccatccaga  
 Xmv16 ggagcccccatgattgcctcgagatcttggtgaaacgcgatggaaccagaccggaCctcaccgaccagcccatccaga  
 Xmv17 ----cccccatgattgcctcgagatcttggtgaaacgcgatggaaccagaccggaTctcaccgaccagcccatccaga  
 Xmv18 ggagcccccatgattgcctcgagatcttggtgaaacgcgatggaaccagaccggaTctcaccgaccagcccatccaga  
 Xmv19 ggagcccccatgattgcctcgagatcttggtgaaacgcgatggaaccagaccggaTctcaccgaccagcccatccaga  
 Xmv41 ggagcccccatgaCtgctcgagatcttggtgaaacgcgatggaaccagaccggaCctcacGgaccagcccatccaga  
 Xmv42 -----  
 Xmv43 ggagcccccatgattgcctcgagatcttggtgaaacgcgatggaaccagaccggaTctcaccgaccagcccatccaga  
 Xmv8 ggagcccccatgattgcctcgagatcttggtgaaacgcgatggaaccagaccggaCctcaccgaccagcccatccaga  
 Xmv9 ggagcccccatgattgcctcgagGcttggtgaaacgcgatggaaccagaccggaCctcaccgaccagcccatccaga

XMV\_CONS CGCCGACCACACCTGGTATACCGATGGGAGCAGCTTTTGTCAAGAAGGACAGCGAAAGGCTGGGGCAGCAGTGACGACTG  
 Xmv10 cgccgaccacacctggtataccgatgggagcagctttttgcaagaaggacagcgaaaggctggggcagcagtgacgactg  
 Xmv12 cgccgaccacacctggtataccgatgggagcagctttttgcaagaaggacagcgaaaggctggggcagcagtgacgactg  
 Xmv13 cgccgaccacacctggtataccgatgggagcagctttttgcaagaaggacagcgaaaAgctggggcagcagtgacgacAg  
 Xmv15 cgccgaccacacctggtataccgatgggagcagctttttgcaagaaggacagcgaaaggctggggcagcagtgacgactg  
 Xmv16 cgccgaccacacctggtataccgatgggagcagctttttgcaagaaggacagcgaaaAgctggggcagcagtgacgacAg  
 Xmv17 cgccgaccacacccCggtataccgatgggagcagctttttgcaagaaggacagcgaaaggctggggcagcagtgacgactg  
 Xmv18 cgccgaccacacctggtataccgatgggagcagctttttgcaagaaggacagcgaaaggctggggcagcagtgacgactg  
 Xmv19 cgccgaccacacctggtataccgatgggagcagctttttgcaagaaggacagcgaaaggctggggcagcagtgacgactg  
 Xmv41 cgccgaccacacctggtatacAgatgcaAgcagccttCCTAcaagaaggacagcgGaGAgctggAgcGcgGtgacCactg  
 Xmv42 -----  
 Xmv43 cgccgaccacacctggtataccgatgggagcagctttCtgcaagaaggacagcgaaaggctggggcagcagtgacgactg  
 Xmv8 cgccgaccacacctggtataccgatgggagcagctttttgcaagaaggacagcgaaaAgctggggcagcagtgacgacAg  
 Xmv9 cgccgaccacacctggtataccgatgggagcagctttttgcaagaaggacagcgaaaAgctggggcagcagtgacgacAg

XMV\_CONS ARACCGAGGTAATCTGGGCGAGGGCCCTGCCAGCTGGAACGTCAGCCAGCGAGCCGAACGTATCGCACTCACCCAAGCC  
 Xmv10 aGaccgaggtaatctgggcgagggccctgccagctggaacgtcagccagcgagccgaactgatcgactcacccaagcc  
 Xmv12 aAaccgaggtaatctgggcgagggccctgccagctggaacgtcagccagcgagccgaactgatcgactcacccaagcc  
 Xmv13 aGaccgaggtaatctgggcgagggccctgccagctggaacgtcagccagcgagccgaactgatcgactcacccaagcc  
 Xmv15 aAaccgaggtaatctgggcgagggccctgccagctggaacgtcagccagcgagccgaactgatcgactcacccaagcc  
 Xmv16 aGaccgaggtaatctgggcgagggccctgccagctggaacgtcagccagcgagccgaactgatcgactcacccaagcc  
 Xmv17 aAaccgaggtaatctgggcgagggccctgccagctggaacgtcagccagcgagccgaactgatcgactcacccaagcc  
 Xmv18 aAaccgaggtaatctgggcgagggccctgccagctggaacgtcagccagcgagccgaactgatcgactcacccaagcc  
 Xmv19 aAaccgaggtaatctgggcgagggccctgccagctggaacgtcagccagcgagccgaactgatcgactcacccaagcc  
 Xmv41 aGaccgaggtaatctgggcAagggcActgcccGgctggaacAAtCgcccagcgagccAaactgatAgcactcacccaagcc  
 Xmv42 -----  
 Xmv43 aAaccgaggtaatctgggcgagggccctgccagctggaacgtcagccagcgagccgaactgatcgactcacccaagcc  
 Xmv8 aGaccgaggtaatctgggcgagggccctgccagctggaacgtcagccagcgagccgaactgatcgactcacccaagcc  
 Xmv9 aGaccgaggtaatctgggcgagggccctgccagctggaacgtcagccagcgagccgaactgatcgactcacccaagcc

XMV\_CONS CTGAAAAATGGCAGAAGGTAAGAAGCTAAATGTTTACTGATAGCCGCTATGCCTTCGCTACGGCCCATGTTTCATGGGGA  
 Xmv10 ctgaaaaatggcagaaggtaagaagctaaatgtttactgaCagccgAtatgctTttcgCacgggccatgtCcatggAga  
 Xmv12 ctgaaaaatggcagaaggtaagaagctaaatgtttactgatagccgctatgccttcgctacggcccatgttcatgggga  
 Xmv13 ctgaaaaatggcagaaggtaagaagctaaatgtttactgaCagccgAtatgctTttcgCacgggccatgtCcatggAga  
 Xmv15 ctgaaaaatggcagaaggtaagaagctaaatgtttactgatagccgctatgccttcgctacggcccatgttcatgggga  
 Xmv16 ctgaaaaatggcagaaggtaagaagctaaatgtttactgaCagccgAtatgctTttcgCacgggccatgtCcatggAga  
 Xmv17 ctgaaaaatggcagaaggtaagaagctaaatgtttactgatagccgctatgccttcgctacggcccatgttcatgggga  
 Xmv18 ctgaaaaatggcagaaggtaagaagctaaatgtttactgatagccgctatgccttcgctacggcccatgttcatgggga  
 Xmv19 ctgaaaaatggcagaaggtaagaagctaaatgtttactgatagccgctatgccttcgctacggcccatgttcatgggga  
 Xmv41 TtAaaaatggcagaaggtaagaagctaaaCgtttactgatagccgctatgccttcgCacgggccatgtCcatggAAa  
 Xmv42 -----  
 Xmv43 ctgaaaaatggcagaaggtaagaagctaaatgtttactgatagccgctatgccttcgctacggcccatgttcatgggga  
 Xmv8 ctgaaaaatggcagaaggtaagaagctaaatgtttactgaCagccgAtatgctTttcgCacgggccatgtCcatggAga  
 Xmv9 ctgaaaaatggcagaaggtaagaagctaaatgtttactgatagccgctatgccttcgctacggcccatgttcatgggga

XMV\_CONS AATATATAGGAGACGGGGTTGCTGACCTCAGAAGGCAAGGAAATCAAGAACAAAAGCGAGATCCTAGCCTTGCTGAAAG  
 Xmv10 aatCtataggagGcgAggggttgctgacctcagaGggcAGaaatcaaAaaciaaGagcgagatcctGgcTttActgaaaag  
 Xmv12 aatataataggagacgggggttgctgacctcagaaggcaaggaaatcaagaacaaaagcgagatcctagccttgctgaaaag  
 Xmv13 aatCtataggagGcgAggggttgctgacctcagaGggcAGaaatcaaAaaciaaGagcgagatcctGgcTttActgaaaag  
 Xmv15 aatataataggagacgggggttgctgacctcagaaggcaaggaaatcaagaacaaaagcgagatcctagccttgctgaaaag  
 Xmv16 aatCtataggagGcgAggggttgctgacctcagaGggcAGaaatcaaAaaciaaGagcgagatcctGgcTttActgaaaag  
 Xmv17 aatataataggagacgggggttgctgacctcagaaggcaaggaaatcaagaacaaaagcgagatcctagccttgctgaaaag  
 Xmv18 aatataataggagacgggggttgctgacctcagaaggcaaggaaatcaagaacaaaagcgagatcctagccttgctgaaaag  
 Xmv19 aatataataggagacgggggttgctgacctcagaaggcaaggaaatcaagaacaaaagcgagatcctagccttgctgaaaag  
 Xmv41 aatataataggagGcgAggggttgctgacctcagaaggcAGaaatTaaAaaciaaagcgagatcTtGgccttgctAaaaag  
 Xmv42 -----  
 Xmv43 aatataataggagacgggggttgctgacctcagaaggcaaggaaatcaagaacaaaagcgagatcctagccttgctgaaaag  
 Xmv8 aatCtataggagGcgAggggttgctgacctcagaGggcAGaaatcaaAaaciaaGagcgagatcctGgcTttActgaaaag  
 Xmv9 aatataataggagacgggggttgctgacctcagaaggcaaggaaatcaagaacaaaagcgagatcctagccttgctgaaaag

XMV\_CONS CCCTCTTTTTCCTgcccTaaAagActcagtatAatTcaCtgcccCggGcaTcaaaaGggAaacagtgcTgaagccaggggcaac  
 Xmv10 cTctTtCCTgcccTaaAagActcagtatAatTcaCtgcccCggGcaTcaaaaGggAaacagtgcTgaagccaggggcaac  
 Xmv12 ccctctttttgccaagagGctcagtatattatccattgcccGggacaCaaaaaggGaacagtgcTgaagccaggggcaac  
 Xmv13 cTctTtCCTgcccTaaAagActcagtatAatTcaCtgcccCggGcaTcaaaaGggAaacagtgcTgaagccaggggcaac  
 Xmv15 ccctctttttgccaagagGctcagtatattatccattgcccGggacaCaaaaaggGaacagtgcTgaagccaggggcaac  
 Xmv16 cTctTtCCTgcccTaaAagActcagtatAatTcaCtgcccCggGcaTcaaaaGggAaacagtgcTgaagccaggggcaac  
 Xmv17 ccctctttttgccaagagGctcagtatattatccattgcccGggacaCaaaaaggGaacagtgcTgaagccaggggcaac  
 Xmv18 ccctctttttgccaagagGctcagtatattatccattgcccGggacaCaaaaaggGaacagtgcTgaagccaggggcaac  
 Xmv19 ccctctttttgccaagagGctcagtatattatccattgcccGggacaCaaaaaggGaacagtgcTgaagccaggggcaac  
 Xmv41 cTctctttCtgcccCaaAagActTtagtatAatTcattgTccAggacaTcaGaaaAGacagtgcCgaagccagAggcaac  
 Xmv42 -----  
 Xmv43 ccctctttttgccaagagActcagtatattatccattgcccAggacaTcaGaaaggAGacagtgcCgaagccagAggcaac  
 Xmv8 cTctTtCCTgcccTaaAagActcagtatAatTcaCtgcccCggGcaTcaaaaGggAaacagtgcTgaagccaggggcaac  
 Xmv9 ccctctttttgccaagagGctcagtatattatccattgcccGggacaCaaaaaggGaacagtgcTgaagccaggggcaac

XMV\_CONS CGWATGGCRGAYCAAGCRGCCMGRGAGGCAGCCATRAGRVRDDBYVCAGAAACTTCCACVCTCYTHATAGAGGAYTCGWC  
 Xmv10 cgTatggcAgaCcaagcGgccCgAgagggcagccatA-----  
 Xmv12 cgAatggcGgaTcaagcAgccAgGgagggcagccatGagAGAGATCAcagaaacttccacGctcTtAatagaggaTtcgTc  
 Xmv13 cgTatggcAgaCcaagcGgccCgAgagggcagccatAagGACATCTCagaaacttccacCctcCtCatagaggaCtcgAc  
 Xmv15 cgAatggcGgaTcaagcAgccAgGgagggcagccatGagAGAGATCAcagaaacttccacGctcTtAatagaggaTtcgTc  
 Xmv16 cgTatggcAgaCcaagcGgccCgAgagggcagccatAagGACATCTCagaaacttccacCctcCtCatagaggaCtcgAc  
 Xmv17 cgAatggcGgaTcaagcAgccAgGgagggcagccatG-----  
 Xmv18 cgAatggcGgaTcaagcAgccAgGgagggcagccatGagAGAGATCAcagaaacttccacGctcTtAatagaggaTtcgTc  
 Xmv19 cgAatggcGgaTcaagcAgccAgGgagggcagccatGagAGGGATCAcagaaacttccacGctcTtAatagaggaTtcgTc  
 Xmv41 cgTatggcAgaCcaGgcGgccCgAgagggcagccaCAAAGACAGTTTCagaaGcCtcTAcActcCtTatagaggaCtcgAc  
 Xmv42 -----  
 Xmv43 cgTatggcAgaCcaGgcGgccCgAgagggcagccaCAAAGACAGTTTCagaaGcCtcTAcActcCtTatagaggaCtcgAc  
 Xmv8 cgTatggcAgaCcaagcGgccCgAgagggcagccatAagGACATCTCagaaacttccacCctcCtCatagaggaCtcgAc  
 Xmv9 cgAatggcGgaTcaagcAgccAgGgagggcagccatGagAGAGAGCGcagaaacttccacGctcTtAatagaggaTtcgTc

XMV\_CONS CCCGTATACKCCDSYTAyttCCACTACACHGARACWGAYMKAAAARMYTDCKRRRACTGGGAGCCRYMTAYRATSAGR  
 Xmv10 -----  
 Xmv12 cccgtatacTcccAGTtaCttccactacacAgaGacTgaCAGaaaaGACCTtTGAGactgggagccGTAtaCGatGagG  
 Xmv13 cccgtatacGcccTCCCaTttccactacacTgaAacAgaTCTaaaGAGATtAcGAGAactgggagccACCTaTAatCagA  
 Xmv15 cccgtatacTcccAGTtaCttccactacacAgaGacTgaCAGaaaaGACCTtTGAGactgggagccGTAtaCGatGagG  
 Xmv16 cccgtatacGcccTCCCaTttccactacacTgaAacAgaTCTaaaGAGATtAcGAGAactgggagccACCTaTAatCagA  
 Xmv17 -----  
 Xmv18 TcccgtatacTcccAGTtaCttccactacacAgaGacTgaCAGaaaaGACCTtTGAGactgggagccGTAtaCGatGagG  
 Xmv19 cccgtatacTcccAGTtaCttccactacacAgaGacTgaCAGaaaaGACCTtTGAGactgggagccGTAtaCGatGagG  
 Xmv41 cccgtacacGccTGGCtaTttccacTtacacCgaAacAgaTCTaaaAGATtAcGAGAactgggagccACCTaTAaCCagA  
 Xmv42 -----  
 Xmv43 cccgtacacGccTGGCtaTtccacTtacacCgaAacAgaTCTaaaAGATtGcGAGAactgggGgccACCTaTAatCagA  
 Xmv8 cccgtatacGcccTCCCaTttccactacacTgaAacAgaTCTaaaGAGATtAcGAGAactgggagccACCTaTAatCagA  
 Xmv9 cccgtatacTcccAGCtaCttccactacacAgaGacTgaCAGaaaaGACCTtTGAGactgggagccGTAtaCGatGagG

XMV\_CONS WMAAARGRTATTGGGTCTCCTRCARGGMAARCKGTAATGCCYGAICARTTYRYSTTTGARCTMTTAGACTCCCTACACMGG  
 Xmv10 -----tattgggtcctAcaAggCaaGccGgtaaatgccCgaTcaGttTGTGtttgaActAtttagactccctTtacacAgg  
 Xmv12 ACaaaAgGtattgggtcctGcaGggAaaAccTgtaaatgccTgaCcaAttCACCTtttAGctCtttagactccctacacCgg  
 Xmv13 TAaaaGgAtattgggtcctAcaAggCaaGccGgtaaatgccCgaTcaGttTGTGtttgaActAtttagactccctTtacacAgg  
 Xmv15 ACaaaAgGtattgggtcctGcaGggAaaAccTgtaaatgccTgaCcaAttCACCTtttgaGctCtttagactccctacacCgg  
 Xmv16 TAaaaGgAtattgggtcctAcaAggCaaGccGgtaaatgccCgaTcaGttTGTGtttgaActAtttagactccctTtacacAgg  
 Xmv17 -----tattgggtcctGcaGggAaaAccTgtaaatgccTgaCcaAttCACCTtttgaGctCtttagactccctacacCgg  
 Xmv18 ACaaaAgGtattgggtcctGcaGggAaaAccTgtaaatgccTgaCcaAttCACCTtttgaGctCtttagactccctacacCgg  
 Xmv19 ACaaaAgGtattgggtcctGcaGggAaaAccTgtaaatgccTgaCcaAttCACCTtttgaGctCtttagactccctacacCgg  
 Xmv41 TAaaaGgAtattgggtcctAcaAggCaaGccGgtGatgccCgaTcaGttTGTGtttgaActAtttagactccctTcacAgA  
 Xmv42 -----  
 Xmv43 TAaaaGgAtattgggtcctAcaAggCaaGccGgtGatgccCgaTcaGttTGTGtttgaActAtttagactccctTcacAgA  
 Xmv8 TAaaaGgAtattgggtTctAcaAggCaaGccGgtaaatgccCgaTcaGttTGTGtttgaActAtttagactccctTtacacAgg  
 Xmv9 ACaaaAGtattgggtcctGcaGggAaaAccTgtGatgccTgaCcaAttCACCTtttgaGctCtttagaTtccctacacCgg

XMV\_CONS CTCACCCACCTCAGCYMTCARAAGATGAAGGCACCTCTTGACMGRGAAGARAGCCCCCTACTACATGTTAAATMGRGAYAG  
 Xmv10 ctcacTcacctcagcCTtcaAaagatgaaggcactccttgacAgAgaagaAagccctactacatgtttaa-----  
 Xmv12 ctcacccacctcaAcTAtcaGaagatgaaggcactccttgacCgGgaagaGagccctactacatgtttaaCgGgaTaA  
 Xmv13 ctcacTcacctcagcCTtcaAaagatgaaggcactccttgacAgAgaagaAagccctactacatgtttaaCAGAgAAG  
 Xmv15 ctcacccacctcagcTAtcaGaagatgaaggcactccttgacCgGgaagaGagccctactacatgtttaaCgGgTAG  
 Xmv16 ctcacTcacctcagcCTtcaAaagatgaaggcactccttgacAgAgaagaAagccctactacatgtttaaCAGAgAAG  
 Xmv17 ctcacccacctcagcTAtcaGgGatgaaggcactccttgacCgGgaagaGagccctactacatgtttaa-----  
 Xmv18 ctcacccacctcagcTAtcaGaagatgaaggcactccttgacCgGgaagaGagccctactacatgtttaaCgGgaTAG  
 Xmv19 ctcacccacctcagcTAtcaGaagatgaaggcactccttgacCgGgaagaGagccctactacatgtttaaCgGgaTAG  
 Xmv41 ctcacccaTctcagcCTtcaAaagatgaaggcactccttgacAgAgaagaAagccctactacatgtttaaCCgAgAAG  
 Xmv42 -----  
 Xmv43 ctcacccaTctcagcCTtcaAaagatgaaggcGctccttgacAgAgaagaAagccctactacatgtttaaCAGGgaAG  
 Xmv9 ctcacTcacctcagcCTtcaAaagatgaaggcactccttgacAgAgaagaAagccctactacatgtttaaCAGAgAAG  
 ctcacccacctcagcTAtcaGaagatgaaggcactccttgacCgGgaagaGagccctactacatgtttaaCgGgaTaA

XMV\_CONS AACTCTCCAGYAYGTRRCAGAATCCTGYACAGCTTGTGCTCAAGTRAATGCTAGTAAAGCCAAAATCGGRGCARGGGTRC  
 Xmv10 -----  
 Xmv12 aactctccagCaCgtAAcagaatcctgTacagcttgtgctcaagtAaatgctagtaaagccaaaatcggAgcaAaggtGc  
 Xmv13 aactctccagTaTgtGGcagaatcAtgCacagcttgtgctcaagtGaatgctagtaaagccaaGatcggGgcaGgggtAc  
 Xmv15 aactctccagCaCgtAAcagaatcctgTacagcttgtgctcaagtAaatgctagtaaagccaaaatcggAgcaAaggtGc  
 Xmv16 aactctccagTaTgtGGcagaatcAtgCacagcttgtgctcaagtGaatgctagtaaagccaaGatcggGgcaGgggtAc  
 Xmv17 -----  
 Xmv18 aactctccagCaCgtAAcagaatcctgTacagcttgtgctcaagtAaatgctagtaaagccaaaatcggAgcaAaggtGc  
 Xmv19 aactctccagCaCgtAAcagaatcctgTacagcttgtgctcaagtAaatgctagtaaagccaaaatcggAgcaAaggtGc  
 Xmv41 aactctTcagTaTgtGGcGgaatcctgCacaActtgtgctcaagtGaatgctagtaaagccaaaatcggGgcaGgggtAc  
 Xmv42 -----  
 Xmv43 aactctTcagTaTgtGGcagaatcctgCacagTctgtgctcaagtAaatgctagtaaagccaaaatcggGgcaGgggtAc  
 Xmv8 aactctccagTaTgtGGcagaatcAtgCacagcttgtgctcaagtGaatgctagtaaagccaaGatcggGgcaGgggtAc  
 Xmv9 aactctccagCaCgtAAcGgaatcctgTacagcttgtgctcaagtAaatgctagtaaagccaaaatcggAgcaAaggtGc

XMV\_CONS GAGYRCGSGGACAYCGACCMGGYACCCATTGGGAAATYGAYTTTACYGAAGTTAAGCCAGGGCTGTAYGGRATAYAAGTAC  
 Xmv10 -----  
 Xmv12 gagCGcgGggacaCcgaccCggCacccattgggaaatCgaTtttacCgaagttaagccagggtgtgTggACaTaagtaT  
 Xmv13 gagTAcgCggacaTcgaccAggTaccattgggaaatTgaCtttacTgaagttaagccagggtgtgTggACaTaagtaT  
 Xmv15 gagCGcgGggacaCcgaccCggCacccattgggaaatCgaTtttacCgaagttaagccagggtgtgTggACaTaagtaT  
 Xmv16 gagTAcgCggacaTcgaccAggTaccattgggaaatTgaCtttacTgaagttaagccagggtgtgTggACaTaagtaT  
 Xmv17 -----  
 Xmv18 gagCGcgGggacaCcgaccCggCacccattgggaaatCgaTtttacCgaagttaagccagggtgtgTggACaTaagtaT  
 Xmv19 gagCGcgGggacaCcgaccCggCacccattgggaaatCgaTtttacCgaagttaagccagggtgtgTggACaTaagtaT  
 Xmv41 gagTAcgCggacaTcgaccAggTaccattgggaaatTgaCttCacTgaagttaaAccagggtgtgTggACaTaagtaT  
 Xmv42 -----  
 Xmv43 gagTAcgCggacaTcgaccAggTaccattgggaaatTgaCttCacTgaagttaaAccagggtgtgTggACaTaagtaT  
 Xmv8 gagTAcgCggacaTcgaccAggTaccattgggaaatTgaCtttacTgaagttaagccagggtgtgTggACaTaagtaT  
 Xmv9 gagCGcgGggacaCcgaccCggCacccattgggaaatCgaTtttacCgaagttaagccagggtgtgTggACaTaagtaT

XMV\_CONS CTCCTGGTGTTYGTGGACACMTTCTCTGGCTGGGTAGAAGCMTTYCCAACYAARCGTGAAACTGCCARGGTGTGTACCAA  
 Xmv10 ctcctAggtgtCgtggacacCttctctggctgggtagaagCttCccaacTaaAcgtgaaacCgccaAggtGgtAaccaa  
 Xmv12 ctcctgggtgtTgtggacacAttctctggctgggtagaagAttTccaacCaaGcgtgaaactgccAGgttgtgaccaa  
 Xmv13 ctcctAggtgtCgtggacacCttctctggctgggtagaagCttCccaacTaaAcgtgaaacCgccaAAgtGgtAaccaa  
 Xmv15 ctcctgggtgtTgtggacacAttctctggctgggtagaagAttTccaacCaaGcgtgaaactgccAGgttgtgaccaa  
 Xmv16 ctcctAggtgtCgtggacacCttctctggctgggtagaagCttCccaacTaaAcgtgaaacCgccaAggtGgtAaccaa  
 Xmv17 ctcctgggtgtTgtggacacAttctctggctgggtagaagAttTccaacCaaGcgtgaaactgccAGgttgtgaccaa  
 Xmv18 ctcctgggtgtTgtggacacAttctctggctgggtagaagAttTccaacCaaGcgtgaaactgccAGgttgtgaccaa  
 Xmv19 ctcctgggtgtTgtggacacAttctctggctgggtagaagAttTccaacCaaGcgtgaaactgccAGgttgtgaccaa  
 Xmv41 ctcctgggtgtCgtAgacacCttctctggctgggtGAaagCttCccaacTaaAcgtgaaactgccAGgttgtAaccaa  
 Xmv42 -----  
 Xmv43 ctcctgggtgtCgtAgacacCttctctggctgggtGAaagCttCccaacTaaAcgtgaaactgccAGgttgtgaccaa  
 Xmv8 ctcctAggtgtCgtggacacCttctctggctgggtagaagCttCccaacTaaAcgtgaaacCgccaAggtGgtAaccaa  
 Xmv9 ctcctgggtgtTgtggacacAttctctggctgggtagaagAttTccaacCaaGcgtgaaactgccAGgttgtgaccaa

XMV\_CONS GAAGCTRYTWGAAGAAATWTTTCCAAAGATTGCGGATGCCMCAGGTATTGGGDWCHGATAATGGGCCTGCCTTCRTCTCCC  
 Xmv10 gaagctAttAgaagaaatAttCccaagattcgggatgccAcaggtaCtgggTTcTgaCaatgggctgccttcGtctccc  
 Xmv12 gaagctGCTTgaagaaatTttTccaagattcgggatgccCagggtattgggAAcAgataatgggctgccttcAtctccc  
 Xmv13 gaagctAttAgaagaaatAttCccaagattcgggatgccAcaggtaCtgggTTcTgaCaatgggctgccttcGtctccc  
 Xmv15 gaagctGCTTgaagaaatTttTccaagattcgggatgccCagggtattgggGAcAgataatgggctgccttcAtctccc  
 Xmv16 gaagctAttAgaagaaatAttCccaagattcgggatgccAcaggtaCtgggTTcTgaCaatgggctgccttcGtctccc  
 Xmv17 gaagctGCTTgaagaaatTttTccaagattcgggatgccCagggtattgggGAcAgataatgggctgccttcAtctccc  
 Xmv18 gaagctGCTTgaagaaatTttTccaagattcgggatgccCagggtattgggGAcAgataatgggctgccttcAtctccc  
 Xmv19 gaagctGCTTgaagaaatTttTccaagattcgggatgccCagggtattgggGAcAgataatgggctgccttcAtctccc  
 Xmv41 gaagctAttAgaagaaatAttCccaagattcgggatgccAcagggtattgggTTcCgataatgggctgccttcGtctccc  
 Xmv42 -----  
 Xmv43 gaagctAttAgaagaaatAttCccaagattcgggatgccAcagggtattgggTTcCgataatgggctgccttcGtctccc  
 Xmv8 gaagctATTgaagaaatAttCccaagattcgggatgccAcaggtaCtgggTTcTgaCaatgggctgccttcGtctccc  
 Xmv9 gaagctGCTTgaagaaatTttTccaagattcgggatgccCagggtattgggGAcAgataatgggctgccttcAtctccc

XMV\_CONS AGGTAAGTCAGTCGGTGGCCGATTTRCTGGGGATTGATTGGAAAYTRCATTGTGCTTATAGACCCAGAGTTCAGGTCAG  
 Xmv10 aggttaagtcattcgggtggccgatttActggggatttgattggaaGTtAcattgtgcttatagaccccagagttcaggtcag  
 Xmv12 aggttaagtcagtcgggtggccAAGttGctggggatttgattggaaaCtGcattgtgcttaCagaccccagagttcaggtcag  
 Xmv13 aggttaagtcattcgggtggccgatttActggggatttgattggaaGTtAcattgCgcttatagaccccagagttcaggtcag  
 Xmv15 aggttaagtcagtcgggtggccAAGttGctggggatttgattggaaaCtGcattgtgcttaCagaccccagagttcaggtcag  
 Xmv16 aggttaagtcattcgggtggccgatttActggggatttgattggaaGTtAcattgtgcttatagaccccagagttcaggtcag  
 Xmv17 aggttaagtcagtcgggtggccAAGttGctggggatttgattggaaaCtGcattgtgcttaCagaccccagagttcaggtcag  
 Xmv18 aggttaagtcagtcgggtggccAAGttGctggggatttgattggaaaCtGcattgtgcttaCagaccccagagttcaggtcag  
 Xmv19 aggttaagtcagtcgggtggccAAGttGctggggatttgattggaaaCtGcattgtgcttaCagaccccagagttcaggtcag  
 Xmv41 aggttaagtcagtcgggtggccgatttActggggatCgattAgaatTtAcattgtgcttatagaccccagagttcaggtcag  
 Xmv42 -----  
 Xmv43 aggttaagtcagtcgggtggccgatttActggggatCgattggaaaTtAcattgtgcttatagaccccagagttcaggtcag  
 Xmv8 aAgtaagtcattcgggtggccgatttActggggatttgattggaaGTtAcattgtgcttatagaccccagagttcaggtcag  
 Xmv9 aggttaagtcagAcAgtggccgatttGTtggggatCgattggaaaCtGcattgtgcttatagaccccagagttcaggtcag

XMV\_CONS GTAGAAAGAATGAATAGAACMATCAAGGAGACTTTAACCAAATTAACGCTTGACAGCTGGCACTAGAGACTGGGTACTCCT  
 Xmv10 gtagaGagaatgaatagaacCatcaaggagactttaaccaaattaacgctGgcagctggcactagagactgggtactcct  
 Xmv12 gtagaAagaatgaatagaacCagGacAatcaaggagactttaaccaaattaacgctGgcagctggcactagagactgggtactcct  
 Xmv13 gtagaGagaatgaatagaacCatcaaggagactttaaccaaattaacgctGgcagctggcactagagactgggtactcct  
 Xmv15 gtagaAagaatgaatagaacCagGacAatcaaggagactttaaccaaattaacgctGgcagctggcactagagactgggtactcct  
 Xmv16 gtagaGagaatgaatagaacCatcaaggagactttaaccaaattaacgctGgcagctggcactagagactgggtactcct  
 Xmv17 gtagaAagaatgaatagaacCagGacAatcaaggagactttaaccaaattaacgctGgcagctggcactagagactgggtactcct  
 Xmv18 gtagaAagaatgaatagaacCagGacAatcaaggagactttaaccaaattaacgctGgcagctggcactagagactgggtactcct  
 Xmv19 gtagaAagaatgaatagaacCagGacAatcaaggagactttaaccaaattaacgctGgcagctggcactagagactgggtactcct  
 Xmv41 gtagaAagaatAaatagaacCatcaaggagactCtaacTaaatataacgctGgcagctggcactagagactgggtactcct  
 Xmv42 -----  
 Xmv43 gtagaAagaatgaatagaacCatcaaggagactCtaacTaaatataacgctGgcagctggcactagagactgggtactcct  
 Xmv8 gtagaGagaatgaatagaacCatcaaggagactttaaccaaattaacgctGgcagctggcactagagactgggtactcct  
 Xmv9 gtagaAagaatgaatagaacAatcaaggagactttGaccaaataacgctGgcagctggcactagagactgggtactcct

XMV\_CONS ACTCCCCCTGGCCCTCTACCAGCCCGGAATACTCCGGGCCCCCATGGACTTACTCCGTATGAAATTCTGTATGGGGCAC  
 Xmv10 actccccctggccctctaccgagcccggaataactccgggcccccatggacttactccgtatgaaatCctgtatggggcac  
 Xmv12 actccccctggccctctaccgagcccggaataactccgggcccccatggacttactccgtatgaaattctgtatggggcac  
 Xmv13 actccccctggccctctaccgagcccggaataactccgggccccAactggacttactccgtatgaaattctgtatggggcac  
 Xmv15 actccccctggccctctaccgagcccggaataactccgggccccatggacttactccgtatgaaattctgtatggggcac  
 Xmv16 actccccctggccctctaccgagcccggaataactccgggcccccatggacttactccgtatgaaatCctgtatggggcac  
 Xmv17 actccccctggccctctaccgagcccggaataactccgggccccatggacttactccgtatgaaattctgtatggggcac  
 Xmv18 actccccctggccctctaccgagcccggaataactccgggcccccatggacttactccgtatgaaattctgtatggggcac  
 Xmv19 actccccctggccctctaccgagcccggaataactccgggccccatggacttactccgtatgaaattctgtatggggcac  
 Xmv41 actccccctTtAgccctctaccgagcccggaCactccgggcccccatggactGacCccgtatgaaattctgtatggggcac  
 Xmv42 -----  
 Xmv43 actccccctTtAgccctctaccgagcccggaCactccgggcccccatggactGactccgtatgaaattctgtatggggcac  
 Xmv8 actccccctggccctctaccgagcccggaataactccgggccccatggacttactccgtatgaaatCctgtatggggcac  
 Xmv9 actccccctggccctctaccgagcccggaataactccgggccccAactggactCactccgtatgaaattctgtatggggcac

XMV\_CONS CCCCCCCTTGTC AATTTTCATGATCCTGAAATGTCAAAGTTAACTAATAGTCCCTCTCTCCAAGCTCACTTACAGGCC  
 Xmv10 ccccgccctCgtcaattttcatgatcctgaaatgtcaaagttaactaatagtcctctctccaagctcacttacaggcc  
 Xmv12 ccccgcccttgtcaattttcatgatcctgaaatgtcaaagttaactaatagtcctctctccaagctcacttacaggcc  
 Xmv13 ccccgcccttgtcaattttcatgatcctgaaatgtcaaagttaactaatagtcctctctccaagctcacttacaggcc  
 Xmv15 ccccgcccttgtcaattttcatgatcctgaaatgtcaaagttaactaatagtcctctctccaagctcacttacaggcc  
 Xmv16 ccccgccctCgtcaattttcatgaGcctgaaatgtcaaagttaactaatagtcctctctccaagctcacttacaggcc  
 Xmv17 ccccgcccttgtcaattttcatgatcctgaaatgtcaaagttaactaatagtcctctctccaagctcacttacaggcc  
 Xmv18 ccccgcccttgtcaattttcatgatcctgaaatgtcaaagttaactaatagtcctctctccaagctcacttacaggcc  
 Xmv19 ccccgcccttgtcaattttcatgatcctgaaatgtcaaagttaactaatagtcctctctccaagctcacttacaggcc  
 Xmv41 ccccgcccttgtcaattttcatgatcctgaaatgtcaaagttaactaatagtcctctctccaagctcacttacaggcc  
 Xmv42 -----caagctcacttacaggcc  
 Xmv43 ccccgcccttgtcaattttcatgatcctgaaatgtcaaagttaactaatagtcctctctccaagctcacttacaggcc  
 Xmv8 cccgccccCgtcaattttcatgatcctgaaatgtcaaagttaactaatagtcctctctccaagctcacttacaggcc  
 Xmv9 ccAagcccttgtcaattttcatgatcctgaaatgtcaaagttaactaatagtcctctctccaagctcacttacaggcc

XMV\_CONS CTCCAAGCAGTACAACGAGAGGTCTGGAAGCCACTGGCCGCTGCTTATCAGGACCAGCTGGATCAGCCAGTGATACCACA  
 Xmv10 ctccaagcagtacaacgagaggtctggaagccactggccgctgcttatcaggaccagctggatcagccagtgataccaca  
 Xmv12 ctccaagcagtacaacgagaggtctggaagccactggccgctgcttatcaggaccagctggatcagccagtgataccaca  
 Xmv13 ctccaagcagtacaacgagaggtctggaagccactggccgctgcttatcaggaccagctggatcagccagtgataccaca  
 Xmv15 ctccaagcagtacaacgagaggtctggaagccactggccgctgcttatcaggaccagctggatcagccagtgataccaca  
 Xmv16 ctccaagcagtacaacgagaggtctggaagccactggccgctgcttatcaggaccagctggatcagccagtgataccaca  
 Xmv17 ctccaagcagtacaacgagaggtctggaagccactggccgctgcttatcaggaccagctggatcagccagtgataccaca  
 Xmv18 ctccaagcagtacaacgagaggtctggaagccactggccgctgcttatcaggaccagctggatcagccagtgataccaca  
 Xmv19 ctccaagcagtacaacgagaggtctggaagccactggccgctgcttatcaggaccagctggatcagccagtgataccaca  
 Xmv41 ctccaagcagtacaacgagaggtctggaagccGctggccgctgcttatcGggaccagctAagatcagccagtgataccaca  
 Xmv42 ctccaagcagtacaacgagaggtctggaGgccaactggcTgctgcttatcaggaccagctggatcagccagtgataccaca  
 Xmv43 ctccaagcagtacaacgagaggtctggaagccGctggccgctgcttatcaggaccagctAagatcagccagtgataccaca  
 Xmv8 ctccaagcagtacaacgagaggtctggaagccactggccgctgcttatcaggaccagctggatcagccagtgataccaca  
 Xmv9 ctccaagcagtacaacgagaggtctggaagccGctggccgctgcttatcaggaccagctggatcagccagtgataccaca

XMV\_CONS CCCCTTCCGTGTGCGTGACGCCGTGTGGGTACGCCGGCACCAGACTAAGAACTTAGAACCCCGCTGGAAAGGACCTTACA  
 Xmv10 ccccttcggtgctcggtgacgccgtgtgggtacgccggcaccagactaagaacttagaaccgccgctggaaaggacctaca  
 Xmv12 ccccttcgCgtcggtgacgccgtgtgggtacgccggcaccagactaagaacttagaaccgccgctggaaaggacctaca  
 Xmv13 ccccttcggtgctcggtgacgccgtgtgggtacgccggcaccagactaagaacttagaaccgccgctggaaaggacctaca  
 Xmv15 ccccttcgCgtcggtgacgccgtgtgggtacgccggcaccagactaagaacttagaaccgccgctggaaaggacctaca  
 Xmv16 ccccttcggtgctcggtgacgccgtgtgggtacgccggcaccagactaagaacttagaaccgccgctggaaaggacctaca  
 Xmv17 ccccttcgCgtcggtgacgccgtgtgggtacgccggcaccagactaagaacttagaaccgccgctAaaaggacctaca  
 Xmv18 ccccttcgCgtcggtgacgccgtgtgggtacgccggcaccagactaagaacttagaaccgccgctggaaaggacctaca  
 Xmv19 ccccttcgCgtcggtgacgccgtgtgggtacgccAaccagactaagaacttagaaccgccgctggaaaggacctaca  
 Xmv41 ccccttcggtgctcggtgacgccgtgtgggtacgccggcaccagactaagaacttGgaaccTcgctggaaaggacctaca  
 Xmv42 ccccttcggtgctcggtgacgccgtgtgggtacgccggcaccagactaagaacttagaaccgccgctggaaaggacctaca  
 Xmv43 ccccttcggtgctcggtgacgccgtgtgggtacgccggcaccagactaagaacttGgaaccTcgctggaaaggacctaca  
 Xmv8 ccccttcggtgctcggtgacgccgtgtgggtacgccggcaccagactaagaacCtagaaccTcgctggaaaggacctaca  
 Xmv9 ccccttcggtgctcggtgacgccgtgtgggtGcgccggcaTcagactaagaacCtagaaccTcgctggaaaggacctaca

XMV\_CONS CCGTCTGCTGACCACCCCCACCGCTCTCAAAGTAGACGGCATCTCTGCGTGGATACACGCCGCTCACGTAAGGCGGGCG  
 Xmv10 ccgtcctgctgaccacccccaccgctctcaaagtagacggcatctctgctgggatacacgccgctcacgtaaggcgggcg  
 Xmv12 ccgtcctgctgaccacccccaccgctctcaaagtagacggcatctctgctgggatacacgccgctcacgtaaggcgggcg  
 Xmv13 ccgtcctgctgaccacccccaccgctctcaaagtagacggcatctctgctgggatacacgccgctcacgtaaggcgggcg  
 Xmv15 ccgtcctgctgaccacccccaccgctctcaaagtagacggcatctctgctgggatacacgccgctcacgtaaggcgggcg  
 Xmv16 ccgtcctgctgaccacccccaccgctctcaaagtagacggcatctcCgctgggatacacgccgctcacgtaaggcgggcg  
 Xmv17 ccgtcctgctgaccacccccaccgctctcaaagtagacggcatctctgctgggatacacgccgctcacgtaaggcgggcg  
 Xmv18 ccgtcctgctgaccacccccaccgctctcaaagtagacggcatctctgctgggatacacgccgctcacgtaaggcgggcg  
 Xmv19 ccgtcctgctgaccacccccaccgctctcaaagtagacggcatctctgctgggatacacgccgctcacgtaaggcgggcg  
 Xmv41 ccgtcctgctgaccacccccaccgctctcaaagtTgacggcatctctgctgggatacacgccgctcacgtaaggcgggcg  
 Xmv42 ccgtcctgctgaccTccccaccgctctcaaagtagacggcatctctgctgggatacacgccgctcacgtaaggcgggcg  
 Xmv43 ccgtcctgctgaccacccccaccgctctcaaagtTgacggcatctctgctgggatacacgccgctcacgtaaggcgggcg  
 Xmv8 ccgtcctActgaccacccccaccgctctcaaagtagacggcatctctgctgggatacacgccgctcacgtaaggcgggcg  
 Xmv9 ccgtcctActAAccacccccaccgctctcaaagtagacggcatctctgctgggatacacgccgctcacgtaaggcgggcg

XMV\_CONS ACAACTCCTCCGGCCGGAACAGCATGGAAGGTCCAGCGTTCTCAAAATCCCTTAAAGATAAGATTAAACCCGTGGGGCCCC  
 Xmv10 acaactcctccAagccggaacagca-----tcaaaaCcccttaaagataagattaacccgtggggcccc  
 Xmv12 acaactcctccggccggaacagcatggaaggtccagcgttctcaaaatcccttaaagataagattaacccgtggggcccc  
 Xmv13 acaactcctccAagccggaacagcatggaaggtccagcgttctcaaaaCcccttaaagataagattaacccgtggggcccc  
 Xmv15 acaactcctccggccggaacagcatggaaggtccagcgttctcaaaatcccttaaagataagattaacccgtggggcccc  
 Xmv16 acaactcctccAagccggaacagcatggaaggtccagcgttctcaaaaCcccttaaagataagattaacccgtggggcccc  
 Xmv17 acaactcctccggccggaacagca-----tcaaaatcccttaaagataagattaacccgtggggcccc  
 Xmv18 acaactcctccggccggaacagcatggaaggtccagcgttctcaaaatcccttaaagataagattaacccgtggggcccc  
 Xmv19 acaactcctccggccggaacagcatggaaggtccagcgttctcaaaatcccttaaagataagattaacccgtggggcccc  
 Xmv41 acaactcctccggccggaGcagcatggaaggtccagcgttctcaaaaCcccttaaagataagattaacccgtggggcccc  
 Xmv42 acaactcctccggccggaacagca-----tcaaaatcccttaaagataagattaacccgtggggcccc  
 Xmv43 acaactcctccggccggaGcagcatggaaggtccagcgttctcaaaaCcccttaaagataagattaacccgtggggcccc  
 Xmv8 acaactcctccggccggaacagcatggaaggtccagcgttctcaaaatcccttaaagataagattaacccgtggggcccc  
 Xmv9 acaactcctccggccggaacagcatggaaggtccagcgttctcaaaatcccttaaagataagaCtaacccgtggggcccc

XMV\_CONS CATGGAAGGTCCAGCGTTCTCAAAAHCCCTTAAAGATAAGATTAAACCCGTGGGGCCCCCTVATAGTTATGGGGATCTTAG  
 Xmv10 catgAaaggtccagcgttctcaaaaCcccttaaagataagattaacccgtggggccccctAatagttatggggatcttGg  
 Xmv12 catggaaggtccagcgttctcaaaaTcccttaaagataagattaacccgtggggccccctGatagttatggggatcttag  
 Xmv13 catggaaggtccagcgttctcaaaaCcccttaaagataagattaacccgtggggccccctAatagttatggggatcttGg  
 Xmv15 catggaaggtccagcgttctcaaaaTcccttaaagataagattaacccgtggggccccctGatagttatggggatcttag  
 Xmv16 catggaaggtccagcgttctcaaaaCcccttaaagataagattaacccgtggggccccctAatagttatggggatcttGg  
 Xmv17 catggaaggtccagcgttctcaaaaTcccttaaagataagattaacccgtggggccccctGatagttatggggatcttag  
 Xmv18 catggaaggtccagcgttctcaaaaTcccttaaagataagattaacccgtggggccccctGatagttatggggatcttag  
 Xmv19 catggaaggtccagcgttctcaaaaTcccttaaagataagattaacccgtggggccccctGatagttatggggatcttag  
 Xmv41 catggaaggtccagcgttctcaaaaCcccttaaagataagattaacccgtggggccccctAatagttatggggatcttGg  
 Xmv42 catggaaggtccagcgttctcaaaaTcccttaaagataagattaacccgtggggccccctGatagttatggggatcttag  
 Xmv43 catggaaggtccagcgttctcaaaaCcccttaaagataagattaacccgtggggccccctAatagttatAaggtatcttGg  
 Xmv8 catggaaggtccagcgttctcaaaaTcccttaaagataagattaacccgtggggccccctGatagttatggggatcttag  
 Xmv9 catggaaggtccagcgttctcaaaaTcccttaaagataagaCtaacccgtggggccccctGatagTcatggggatcttag

XMV\_CONS TGAGGGCAGGAGCCTCGGTACAACGTGACAGCCCTCACCAGGTCTTCAATGTTACTTGGAGAGTTACCAACCTAATGACA  
 Xmv10 tgagggcaggagcctcgggtacaacgtgacagccctcaccagAatctcaatgttacttggagaggtaccaacctaatgaca  
 Xmv12 tgagggcaggagcctcgggtacaacgtgacagccctcaccaggtcttcaatgttacttggagaggtaccaacctaatgaca  
 Xmv13 tgagggcaggagcctcgggtacaacgtgacagccctcaccagAatctcaatgttacttggagaggtaccaacctaatgaca  
 Xmv15 tgagggcaggagcctcgggtacaacgtgacagccctcaccaggtcttcaatgttacttggagaggtaccaacctaatgaca  
 Xmv16 tgagggcaggagcctcgggtacaacgtgacagccctcaccagAatctcaatgttacttggagaggtaccaacctaatgaca  
 Xmv17 tgagggcaggagcctcgggtacaacgtgacagccctcaccaggtcttcaatgttacttggagaggtaccaacctaatgaca  
 Xmv18 tgagggcaggagcctcgggtacaacgtgacagccctcaccaggtcttcaatgttacttggagaggtaccaacctaatgaca  
 Xmv19 tgagggcaggagcctcgggtacaacgtgacagccctcaccaggtcttcaatgttacttggagaggtaccaacctaatgaca  
 Xmv41 tgagggcaggagcctcgggtacaacgtgacagccctcaccaggtcttcaatgtCacttggagaggtaccaacctaatgaca  
 Xmv42 tgagggcaggagcctcgggtacaacgtgacagccctcaccaggtcttcaatgttacttggagaggtaccaacctaatgaca  
 Xmv43 tgagggcaggagcctcgggtacaacgtgacagccctcaccaggtcttcaatgtCacttggagaggtaccaacctaatgaca  
 Xmv8 tgGgggcaggagcctcggGacaacgtgacagccctcaccaggtcttcaatgttacttggagaggtaccaacctaatgaca  
 Xmv9 tgGgggcaggagcctcggGacaacgtgacagccctcaccaggtcttcaatgttacttgggAagttaccaacctaatgaca

XMV\_CONS GGACAAACAGCTAACGCCACCTCCCTCCTGGGGACGATGACAGACACCTTCCTAAACTATATTTTGACCTGTGTGATTT  
 Xmv10 ggacaaaacagctaacgccacctccctcctggggacgatgacTgacaccttccctaaactatattttgacctgtgtgattt  
 Xmv12 ggacaaaacagctaacgccacctccctcctggggacgatgacagacaccttccctaaactatattttgacctgtgtgattt  
 Xmv13 ggacaaaacagctaacgccacctccctcctggggacgatgacagacaccttccctaaactatattttgacctgtgtgattt  
 Xmv15 ggacaaaacagctaacgccacctccctcctggggacgatgacagacaccttccctaaactatattttgacctgtgtgattt  
 Xmv16 ggacaaaacagctaacgccacctccctcctggggacgatgacagacaccttccctaaactatattttgacctgtgtgattt  
 Xmv17 ggacaaaacagctaacgccacctccctcctggggacgatgacagacaccttccctaaactatattttgacctgtgtgattt  
 Xmv18 ggacaaaacagctaacgccacctccctcctggggacgatgacagacaccttccctaaactatattttgacctgtgtgattt  
 Xmv19 ggacaaaacagctaacgccacctccctcctggggacgatgacagacaccttccctaaactatattttgacctgtgtgattt  
 Xmv41 ggacaaaacagctaacgcTactccctcctggggacgatgacagacaccttccctaaactatattttgacTtgtgtgattt  
 Xmv42 ggacaaaacagctaacgccacctccctcctggggacgatgacagacaccttccctaaactatattttgacctgtgtgattt  
 Xmv43 ggacaaaacagctaacgcTactccctcctggggacgatgacagacaccttccctaaactatattttgacTtgtgtgattt  
 Xmv8 ggacaaaacagctaacgccacctccctcctggggacgatgacagacaccttccctaaactatattttgacctgtgtgattt  
 Xmv9 ggacaaaacagctaacgccacctccctTctggggacGtgacagacaccttccctaaactatattttgacctgtgtgattt

XMV\_CONS AGTAGGAGACTACTGG-----GATGACCCAVMMM--GAT--DGGAGATGGTTGCCGCTCTCCCGGGGAAGAAAAAGGA  
 Xmv10 agtaggagactactgg-----gatgacccaGAACCCgatATTggGgatggttgccgcActccccggggaagaaGaagga  
 Xmv12 agtaggagactactggGATTGGgatgaccca-----gat---ggagatggttgccgctctccccggggaagaaaaagga  
 Xmv13 agtaggagactactgg-----gatgacccaGAACCCgatATTggGgatggttgccgcActccccggggaagaaGaagga  
 Xmv15 agtaggagactactgg-----gatgacccaGAACCCgatATTggGgatggttgccgcActccccggggaagaaGaagga  
 Xmv16 agtaggagactactgg-----gatgacccaGAACCCgatATTggGgatggttgccgcActccccggggaagaaGaagga  
 Xmv17 agtaggaAactactggGATTGGgatgaccca-----gat---ggagatggttgccgctctccccggggaagaaaaagga  
 Xmv18 agtaggagactactgg-----gatgaccca-----gat---ggagatggttgccgctctccccggggaagaaaaagga  
 Xmv19 agtaggagactactggGATTGGgatgaccca-----gat---ggagatggttgccgctctccccggggaagaaaaagga  
 Xmv41 agtTggagacAactgg-----gatgacccGGAACCCgatATTggagatggttgccgctctccGgggggaagaaaaagga  
 Xmv42 agtaggagaTactgg-----gatgaccca-----gat---ggagatggttgccgctctccccggAgaagaaaaagga  
 Xmv43 agtTggagacCaTtgg-----gatgacccaGAACCCgatATTggagatggttgccgctctccGgggggaagaaaaagga  
 Xmv8 agtaggagactactgg-----gaCgaccca-----gat---ggagatggttgccgctctccccgAAgaagaaaaagga  
 Xmv9 agtaggagactactgg-----gaCgaccca-----gat---ggagTtgggtgcccgtctccccgAAgaagaaaaagga

XMV\_CONS CAAGACTGTATGACTTCTATGTTTGCCCGGTCATACTGTACCAATAGGGTGTGGAGGGCCGGGAGAGGGCTACTGTGGC  
 Xmv10 caagactgtatgacttctatgtttgccccggtcatactgtaccaataggggtgtggagggccgggagagggctactgtggc  
 Xmv12 caagactgtatgacttctatgtttgccccggtcatactgtaccaataggggtgtggagggAccgggagagggctactgtggc  
 Xmv13 caagactgtatgacttctatgtttgccccggtcatactgtaccaataggggtgtggagggccgggagagggctactgtggc  
 Xmv15 caagactgtatgacttctatgtttgccccggtcatactgtaccaataggggtgtggagggccgggagagggctactgtggc  
 Xmv16 caagactgtatgacttctatgtttgccccggtcatactgtaccaataggggtgtggagggccgggagagggctactgtggc  
 Xmv17 caagactgtatgacttctatgtttgccccggtcatactgtaccaataggggtgtggagggccgggagagggctactgtggc  
 Xmv18 caagactgtatgacttctatgtttgccccggtcatactgtaccaataggggtgtggagggccgggagagggctactgtggc  
 Xmv19 caagactgtatgacttctatgtttgccccggtcatactgtaccaataggggtgtggagggccgggagagggctactgtggc  
 Xmv41 caagactAatgaTtctatgtttgccccggCcatactgtGcTaaCaggggtgtggagggccgAgagagggctactgCggc  
 Xmv42 caagactgtatgacttctatgtttgccccggtcatactgtaccaGtaggggtgtggagggccgAgagagggctactgtggc  
 Xmv43 caagactgtatgacttctatgtttgccccggtcatactgtaccaataggggtgtggagggccgggagagggctactgtggc  
 Xmv8 caagactgtatgacttctatgtttgcTccggtcatactgtaccaataggggtgtggagggccgggagagggctactgtggc  
 Xmv9 caagactgtatgacttctatgtttgccccggtcatactgtaccaataggggtgtggagggccgggagagggctactgtggc

XMV\_CONS AAATGGGGATGTGAGACCCTGGACAGGCATACTGGAAGCCATCATCATCATGGGACCTAATTTCCCTTAAGCGAGGAAA  
 Xmv10 aaatggggatgtgaAaccactggacaggcactactggaagccatcatcatcatgggacctaatttcccttaagcgaggaaa  
 Xmv12 aaatggggatgtgagaccactggacaggcactactggaagccatcatcatcatgggacctaatttcccttaagcgaggaaa  
 Xmv13 aaatggggatgtgagaccactggacaggcactactggaagccatcatcatcatgggacctaatttcccttaagcgaggaaa  
 Xmv15 aaatggggatgtgagaccactggacaggcactactggaagccatcatcatcatgggacctaatttcccttaagcgaggaaa  
 Xmv16 aaatggggatgtgagaccactggacaggcactactggaagccatcatcatcatgggacctaatttcccttaagcgaggaaa  
 Xmv17 aaatggggatgtgagaccactggacaggcactactggaagccatcatcatcatgggacctaatttcccttaagcgaggaaa  
 Xmv18 aaatggggatgtgagaccactggacaggcactactggaagccatcatcatcatgggacctaatttcccttaagcgaggaaa  
 Xmv19 aaatggggatgtgagaccactggacaggcactactggaagccatcatcatcatgggacctaatttcccttaagcgaggaaa  
 Xmv41 aaatggggatgtgagaccactggacaggcactactggaagccatcatcatcatgggacctaatttcccttaagcgaggaaa  
 Xmv42 aaatggggatgtgagaccactggacaggcactactggaagccatcatcatcatgggacctaatttcccttaagcgaggaaa  
 Xmv43 aaatggggatgtgagaccactggacaggcactactggaagccatcatcatcatgggacctaatttcccttaagcgaggaaa  
 Xmv8 aaatggggatgtgagaccactggacaggcactactggaagccCtcatcatcatgggacctaatttcccttaagcgaggaaa  
 Xmv9 aaatggggatgtgagaccactggacaggcactactggaagccCtcatcatcatgggacctaatttcccttaagcgaggaaa

XMV\_CONS CACTCCTAAGGATCAGGGCCCTGTTATGATTCTC--GGTCTCCAGTGGCGTCCAGGGTGCCACACCGGGGGTTCGAT  
 Xmv10 cactcctaaggatcagggccctgttatgattcctc--ggtctccagtggcgctccagggtgccacacccggggggtcgat  
 Xmv12 cactcctaaggatcagggccctgttatgattcctc--ggtctccagtggcgctccagggtgccacacccggggggtcgat  
 Xmv13 cactcctaaggatcagggccctgttatgattcctc--ggtctccagtggcgctccagggtgccacacccggggggtcgat  
 Xmv15 cactcctaaggatcagggccctgttatgattcctc--ggtctccagtggcgctccagggtgccacacccggggggtcgat  
 Xmv16 cactcctaaggatcagggccctgttatgattcctc--ggtctccagtggcgctccagggtgccacacccggggggtcgat  
 Xmv17 cactcctaaggatcagggccctgttatgattcctc--ggtctccagtggcgctccagggtgccacacccggggggtcgat  
 Xmv18 cactcctaaggatcagggccctgttatgattcctc--ggtctccagtggcgctccagggtgccacacccggggggtcgat  
 Xmv19 cactcctaaggatcagggccctgttatgattcctc--ggtctccagtggcgctccagggtgccacacccggggggtcgat  
 Xmv41 cactcctaaggGtcagggccctgttatgattcctcAGTggtctccagtAgcgctccagggGgccacacccggggggtcgat  
 Xmv42 cactcctaaggatcagggccctgttatgattcctc--ggtctccagtGAgcgctccagggtgccacacccggggggtcgat  
 Xmv43 cactcctaaggatcagggccctgttatgattcctc--ggtctccagtggcgctccagggtgccacacccggggggtcgat  
 Xmv8 cactcctaaggatcagggccctgttatgattcctc--ggtctccagtggcgctccagggtgGtacacccggggggtcgat  
 Xmv9 cactcctaaggatcagggccctgttatGgattcctc--ggtctccagtggcgctccagggtgGtacacccggggggtcgat

|          |                                                                                  |
|----------|----------------------------------------------------------------------------------|
| XMV_CONS | GCAACCCCCTAGTCTTAGAATTCACGTGACGCGGGTAAAAAGGCCAGCTGGGATGCCCCAAAGTTTGGGGACTAAGACTC |
| Xmv10    | gcaacccccctGgtcttagaattcactgacgcgggtGaaaggccagctgggatgccccaaagtTtggggactaagactc  |
| Xmv12    | gcaacccccctagtcttagaattcactgacgcgggtaaaaaggccagctgggatgccccaaagtTtggggactaagactc |
| Xmv13    | gcaacccccctGgtcttagaattcactgacgcgggtGaaaggccagctgggatgccccaaagtTtggggactaagactc  |
| Xmv15    | gcaacccccctagtcttagaattcactgacgcgggtaaaaaggccagctgggatgccccaaagtTtggggactaagactc |
| Xmv16    | gcaacccccctGgtcttagaattcactgacgcgggtaaaaaggccagctgggatgccccaaagtTtggggactGagactc |
| Xmv17    | gcaacccccctagtcttagaattcactgacgcgggtaaaaaggccagctgggatgccccaaagtTtggggactaagactc |
| Xmv18    | gcaacccccctagtcttagaattcactgacgcgggtaaaaaggccagctgggatgccccaaagtTtggggactaagactc |
| Xmv19    | gcaacccccctagtcttagaattcactgacgcgggtaaaaaggccagctgggatgccccaaagtTtggggactaagactc |
| Xmv41    | gcaacccccctagtcttagaattcactgacgcGggtaaaaaggccagctgggatgccccaaagtTtggggactaagactc |
| Xmv42    | gcaacccccctagtcttagaattcactgacgcgggtaaaaaggccagctgggatgccccaaagtTtggggactaagactc |
| Xmv43    | gcaacccccctagtcttagaattcactgacgcgggtaaaaaggccagctgggatgccccaaagtTtggggactaagactc |
| Xmv8     | gcaacccccctagtcttagaattcactgacgcgggtaaaaaggccagctgggatgccccaaagtTtggggactaagactc |
| Xmv9     | gcaacccccctagtcttagaattcactgacgcgggtaaaaaggccagctgggatgccccaaagtTtggggactaagactc |

  

|          |                                                                                   |
|----------|-----------------------------------------------------------------------------------|
| XMV_CONS | TACCGATCCACAGGGGCGACCCGGTGACCCGGTTCTCTTTGACCCGCCAGGTCTCTCAATGTAGGACCCCGCTCCCCAT   |
| Xmv10    | taTcgatccacaggggcccagcccggtgacccggttctctttgaccgcaggtctctcaatgtaggacccccggtccccat  |
| Xmv12    | taccgatccacaggggcccagcccggtgacccggttctctttgaccgcaggtctctcaatgtaggacccccggtccccat  |
| Xmv13    | taTcgatccacaggggcccagcccggtgacccggttctctttgaccgcaggtctctcaatgtaggacccccggtccccat  |
| Xmv15    | taccgatccacaggggcccagcccggtgacccggttctctttgaccgcGggtctctcaatgtaggacccccggtccccat  |
| Xmv16    | taTcgatccacaggggcccagcccggtgacccggttctctttgaccgcaggtctctcaatgtaggacccccggtccccat  |
| Xmv17    | taccgatccacaggggcccagcccggtgacccggttctctttgaccgcaggtctctcaatgtaggacccccggtccccat  |
| Xmv18    | taccgatccacaggggcccagcccggtgacccggttctctttgaccgcaggtctctcaatgtaggacccccggtccccat  |
| Xmv19    | taccgatccacaggggcccagcccggtgacccggttctctttgaccgcaggtctctcaatgtaggacccccggtccccat  |
| Xmv41    | taccgatccacaggggcccagcccggtgacccggttctctttgaccgcaggtctctcaatgtaggacccccggtccccat  |
| Xmv42    | taTcgatccacaggggcccagcccggtgacccggttctctttgaccgcaggtctctcaatgtaggacccccggtccccat  |
| Xmv43    | taccgatccacGgggcccagcccggtgacccggttctctttgaccgcaggtctctcaatgtaggacccccggtccccat   |
| Xmv8     | taTcgatccacaAgggcccagcccggtgacccggttctctttgaccgcaggtctctcaatgtaggacccccggtccccat  |
| Xmv9     | taTcgatccacaAAgggcccagcccggtgacccggttctctttgaccgcaggtctctcaatgtaggacccccggtccccat |

  

|          |                                                                                   |
|----------|-----------------------------------------------------------------------------------|
| XMV_CONS | TGGGCCTAATCCCGTGATCACTGACCAGCTACCCCCATCCCAACCCGTGCAGATCATGCTCCCCAGGCCTCTCATCTCTC  |
| Xmv10    | tgggcctaatacccgtgatcactgaccagctacccccatcccaacccgtgcagatcatgctccccaggcctcctcatcctc |
| Xmv12    | tgggcctaatacccgtgatcactgaccagctacccccatcccaacccgtgcagatcatgctccccaggcctcctcatcctc |
| Xmv13    | tgggcctaatacccgtgatcactgaccagctacccccatcccaacccgtgcagatcatgctccccaggcctcctcatcctc |
| Xmv15    | tgggcctaatacccgtgatcactgaccagctacccccatcccaacccgtgcagatcatgctccccaggcctcctcatcctc |
| Xmv16    | tgggcctaatacccgtgatcactgaccagctacccccatcccaacccgtgcagatcatgctccccaggcctcctcatcctc |
| Xmv17    | tgggcctaatacccgtgatcactgaccagctacccccatcccaacccgtgcagatcatgctccccaggcctcctcatcctc |
| Xmv18    | tgggcctaatacccgtgatcactgaccagctacccccatcccaacccgtgcagatcatgctccccaggcctcctcatcctc |
| Xmv19    | tgggcctaatacccgtgatcactgaccagctacccccatcccaacccgtgcagatcatgctccccaggcctcctcatcctc |
| Xmv41    | tgggcctaatacccgtgatcactgaccagctacccccatcccaacccgtgcagatcatgctccccaggcctcctcatcctc |
| Xmv42    | tgggcctaatacccgtgatcGctgaccagctacccccatcccaacccgtgcagatcatgctccccaggcctcctcatcctc |
| Xmv43    | tgggcctaatacccgtgatcactgaAcagctacccccCtcccaacccgtgcagatcatgctccccaggcctcctcatcctc |
| Xmv8     | tgggcctaatacccgtgatcactgaccagctacccccatcccaacccgtgcagatcatgctccccaggcctcctcatcAtc |
| Xmv9     | tgggcctaatacccgtgatcactgaccagctacccccatcccaacccgtgcagatcatgctccccaggcctcctcatcAtc |

  

|          |                                                                                   |
|----------|-----------------------------------------------------------------------------------|
| XMV_CONS | CTCCTTCAGGCACGGTCTCTATGGTACCTGGGGCTCCCCGCCTTCTCAACA/CCTGGGACGGGAGACAGGCTGCTAAAT   |
| Xmv10    | ctccttcaggcacggtctctatggtacctggggctccccgccttctcaacaAcctgggacgggagacaggctgctaaat   |
| Xmv12    | ctccttcaggcacggtctctatggtacctggggctccccgccttctcaacaGcctgggacgggagacaggctgctaaat   |
| Xmv13    | ctccttcaggcacggtctctatggtacctggggctccccgccttctcaacaAcctgggacgggagacaggctgctaaat   |
| Xmv15    | ctccttcaggcacggtctctatggtacctggggctccccgccttctcaacaGcctgggacgggagacaggctgctaaat   |
| Xmv16    | ctccttcaggcacggtctctatggtacctggggctccccgccttctcaacaAcctgggacgggagacaggctgctaaat   |
| Xmv17    | ctccttcaggcacggtctctatggtacctggggctccccgccttctcaacaGcctgggacgggagacaggctgctaaat   |
| Xmv18    | ctccttcaggcacggtctctatggtacctggggctccccgccttctcaacaGcctgggacgggagacaggctgctaaat   |
| Xmv19    | --ctccttcaggcacggtctctatggtacctggggctccccgccttctcaacaGcctgggacgggagacaggctgctaaat |
| Xmv41    | ctccttcaggcacggtctctatggtGcctggggctccccgccttctcaacaAcctgggacgggGgacaggctgctaaaC   |
| Xmv42    | ctccttcaggcacggtctctatAgtacctggggctccccgccttctcaacaAcctgggacgggagacaggctgctaaat   |
| Xmv43    | ctccttcaggcGeggCctctatggtGcctggggctccccgccttctcaacaAcctgggacgggGgacaggctgctaaaC   |
| Xmv8     | ctccttcaggcacggtctctatggtacctggggctccccgccttctcaacaGcctgggacAggagacaggctActaaat   |
| Xmv9     | ctcctCcaggcacggtctctatggtacctggggctccccgccttctcaacaGcctgggacAggagacaggctActaaGt   |

XMV\_CONS CTGGTAGANGGAGCCTACCAAGCACTCAACCTCACCAGTCCTGACAAAACCCAAGAGTGCTGGTTGTGTCTGGTATCGGG  
 Xmv10 ctggtagaAggagcctaccaagcactcaacctcaccagtcctgacaaaaccaagagtgcctgggtgtgtctggatcggg  
 Xmv12 ctggtagaCggagcctaccaagcactcaacctcaccagtcctgacaaaaccaagagtgcctgggtgtgtctggatcggg  
 Xmv13 ctggtagaAggagcctaccaagcactcaacctcaccagtcctgacaaaaccaagagtgcctgggtgtgtctggatcggg  
 Xmv15 ctggtagaCggagcctaccaagcactcaacctcaccagtcctgacaaaaccaagagtgcctgggtgtgtctggatcggg  
 Xmv16 ctggtagaAggagcctaccaagcactcaacctcaccagtcctgacaaaaccaagagtgcctgggtgtgtctggatcggg  
 Xmv17 ctggtagaCggagcctaccaagcactcaacctcaccagtcctgacaaaaccaagagtgcctgggtgtgtctggatcggg  
 Xmv18 ctAgtagaCggagcctaccaagcactcaacctcaccagtcctgacaaaaccaagagtgcctgggtgtgtctggatcggg  
 Xmv19 ctAgtagaCggagcctaccaagcactcaacctcaccagtcctgacaaaaccaagagtgcctgggtgtgtctggatcggg  
 Xmv41 ctAgtagaAggagcctaccaagcactcaacctcaccagtcCgacaGaaccaagagtgcctggCtgtgtctggatcggg  
 Xmv42 ctggtagaAaAggagcctaccaagcactcaacctcaccagtcctgacaaaaccaagagtgcctgggtAtgtctggatcggg  
 Xmv43 ctAgtagaAaAggagcctaTcaagcactcaacctcaccagtcCgacaGaaccaagagtgcctggCtgtgtctggatcggg  
 Xmv8 ctggtagaCggagcctaccaagcactcaacctcaccagtcctgacaaaaccaagagtgcctgggtgtgtctggatcggg  
 Xmv9 ctggtagaCggagcctaccaagcactcaacctcaccagtcctgacaaaacTcaagagtgcctgggtgtgtctggatcggg

XMV\_CONS ACCCCCTACTACGAAGGGGTTGCCGTCCTAGGTACCTACTCCAACCATACTCTGCCCCAGCTAACTGCTCCGTGGCCT  
 Xmv10 accccctactacgaaggggttgccgtcctaggtacctactccaaccatactctgccccagctaactgctccgtggcct  
 Xmv12 accccctactacgaaggggttgccgtcctaggtacctactccaaccatactctgccccagctaactgctccgtggcct  
 Xmv13 accccctactacgaaggggttgccgtcctaggtacctactccaaccatactctgccccagctaactgctccgtggcct  
 Xmv15 accccctactacgaaggggttgccgtcctaggtacctactccaaccatactctgccccagctaactgctccgtggcct  
 Xmv16 accccctactacgaaggggttgccgtcctaggtacctactccaaccatactctgccccagctaactgctccgtggcct  
 Xmv17 accccctactacgaaggggttgccgtcctaggtacctactccaaccatactctgccccagctaactgctccgtggcctT  
 Xmv18 accccctactacgaaggggttgccgtcctaggtacctactccaaccatactctgccccagctaactgctccgtggcct  
 Xmv19 accccctactacgaaggggttgccgtcctaggtacctactccaaccatactctgccccagctaactgctccgtggcct  
 Xmv41 accccctactacgaaggggttgccgtcctaggtacctactccaaccatactctgccccagctaactgctccgtggcct  
 Xmv42 accccctactacgaaggggttgccgtcctaggtacctactccaaccatactctgccccagctaactgctccgtggcct  
 Xmv43 accccctactacgaaggggttgccgtcctaggtacctactccaaccatactctgccccagctaactgctccgtggcct  
 Xmv8 accccctactacgaaggggttgccgtcctaggtacctactccaaccatactctgccccagctaactgctccgtggcct  
 Xmv9 accccctactacgaaggggttgccgtcctaggtacctactccaaccatactctgccccagctaactgctccgtggcct

XMV\_CONS CCCAACACAAGCTGACCCTGTCCGAAGTGACCGGACAGGGACTCTGCGTAGGAGCAGTTCCTCCAAAACCCATCAGGCCCTG  
 Xmv10 cccaacacaagctgacctgtgccgaagtgacgggacagggactctgcgtaggagcagttcccaaaacccatcaggccctg  
 Xmv12 cccaacacaagctgacctgtgccgaagtgacgggacagggactctgcgtaggagcagttcccaaaacccatcaggccctg  
 Xmv13 cccaacacaagctgacctgtgccgaagtAacgggacagggactctgcgtaggagcagttcccaaaacccatcaggccctg  
 Xmv15 cccaacacaagctgacctgtgccgaagtgacgggacagggactctgcgtaggagcagttcccaaaacccatcaggccctg  
 Xmv16 cccaacacaagctgacctgtgccgaagtgacgggacagggactctgcgtaggagcagttcccaaaacccatcaggccctg  
 Xmv17 cccaacacaagctgacctgtgccgaagtgacgggacagggactctgcgtaggagcagttcccaaaacccatcaggccctg  
 Xmv18 cccaacacaagctgacctgtgccgaagtgacgggacagggactctgcgtaggagcagttcccaaaacccatcaggccctg  
 Xmv19 cccaacacaagctgacctgtgccgaagtgacgggacagggactctgcgtaggagcagttcccaaaacccatcaggccctg  
 Xmv41 cccaacacaagctgacctgtgccgaagtgacgggacagggactctgcgtaggagcagttcccaaaacccatcaggccctg  
 Xmv42 cccaacacaagctgacctgtgccgaagtgacgggacagggactctgcgtaggagcagttcccaaaacccatcaggccctg  
 Xmv43 cccaacacaagctgacctgtgccgaagtGcagggactctgcgtaggagcagttcccaaaacccatcaggccctg  
 Xmv8 cccaacacaagctgacctgtgccgaagtgacgggacagggactctgcgtaggagcagttcccaaaacccatcaggccctg  
 Xmv9 cccaacacaagctgacctgtgccgaagtgacgggacagggactctgcgtaggagcagttcccaaaacccatcaggccctg

XMV\_CONS TGTAATACCACCCAGAAGACGAGCGACGGGTCTACTATCTGGCTGCTCCCGCCGGGACCATCTGGGCTTGCAACACCGG  
 Xmv10 tgtaataaccaccagaagacgagcgacgggtcctactatctggctgctcccgcggggaccatctgggcttgcaaacaccgg  
 Xmv12 tgtaataaccaccagaagacgagcgacgggtcctactatctggctgctcccgcggggaccatctgggcttgcaaacaccgg  
 Xmv13 tgtaataaccaccaAaagacgagcgacgggtcctactatctggctgctcccgcggggaccatctgggcttgcaaacaccgg  
 Xmv15 tgtaataaccaccagaagacgagcgacgggtcctactatctggctgctcccgcggggaccatctgggcttgcaaacaccgg  
 Xmv16 tgtaataaccaccagaagacgagcgacgggtcctactatctggctgctcccgcggggaccatctgggcttgcaaacaccgg  
 Xmv17 tgtaataaccaccagaagacgagcgacgggtcctactatctggctgctcccgcggggaccatctgggcttgcaaacaccgg  
 Xmv18 tgtaataaccaccagaagacgagcgacgggtcctactatctggctgctcccgcggggaccatctgggcttgcaaacaccgg  
 Xmv19 tgtaataaccaccagaagacgagcgacgggtcctactatctggctgctcccgcggggaccatctgggcttgcaaacaccgg  
 Xmv41 tgtaataaccaccaAaagacgagcgacgggtcctactatctggctgctcccgcggggaccatctgggcttgcaaacaccgg  
 Xmv42 tgtaataaccaccagaagacAagcgacgggtcctactatctggctgctcccgcggggaccatctgggcttgcaaacaccgg  
 Xmv43 tgtaataaccaccagaagGcgagcgacgggtcctactatctggctgctcccgcggggaccatctgggcttgcaaacaccgg  
 Xmv8 tgtaataaccaccagaagacgagcgacgggtcctactatctggctgctcccgcggggaccatctgggcttgcaaacaccgg  
 Xmv9 tgtaataaccaccagaagacgaAcgacgggtcctactatctggctgctcccgcggggaccatctgggcttgcaaacaccgg

XMV\_CONS GCTCACTCCCTGCCTATCTACTACTGTACTCAACCTCACCACCGATTACTGTGTCCTGGTTGAGCTCTGGCCAAAGGTGA  
 Xmv10 gctcactccctgcctatctactactgtactcaacctcaccaccgattactgtgtcctgggtgagctctggccaaagggtga  
 Xmv12 gctcactccctgcctatctactactgtactcaacctcaccaccgattactgtgtcctgggtgagctctggccaaagggtga  
 Xmv13 gctcactccctgcctatctactactgtactcaacctcaccaccgattactgtgtcctgggtgagctctggccaaagggtga  
 Xmv15 gctcactccctgcctatctactactgtactcaacctcaccaccgattactgtgtcctgggtgagctctggccaaagggtga  
 Xmv16 gctcactccctgcctatctactactgtactcaacctcaccaccgattactgtgtcctgggtgagctctggccaaagggtga  
 Xmv17 gctcactccctgcctatctactactgtactcaacctcaccaccgattactgtgtcctgggtgagctctggccaaagggtga  
 Xmv18 gctcactccctgcctatctactactgtactcaacctcaccaccgattactgtgtcctgggtgagctctggccaaagggtga  
 Xmv19 gctcactccctgcctatctactactgtactcaacctcaccaccgattactgtgtcctgggtgagctctggccaaagggtga  
 Xmv41 gctcactccctgcctatctacCactgtactcaacctcaccaccgattactgtgtcctgggtgagctctggccaaagggtga  
 Xmv42 gctcactccctgcctatctactactgtactcaacctcaccaccgattactgtgtcctgggtgaAActctggccaaGgggtga  
 Xmv43 gctcactccctgcctatctacCactgtactcaacctcaccaccgattactgtgtcctgggtgagctctggccaaagggtga  
 Xmv8 gctcactccctgcctatctactactgtactcaacctcaccaccgattactgtgtcctgggtgagctctggccaaagggtga  
 Xmv9 gctcactccctgcctatctactactgtactTaaacctcaccaccgattactgtgtcctgggtgagctctggccaaagggtga

XMV\_CONS CCTACCACCTCCCTGGTTATGTTTATGGCCAGTTTGAGAGAAAAACCAAATATAAAAGAGAGCCGGTGTCATTAACCTCTG  
 Xmv10 cctaccactccctgggttatgtttatggccagtttgagaAaaaaaccaaataaaaagGgagccggtgtcattaaactctg  
 Xmv12 cctaccactccctgggttatgtttatggccagtttgagagaaaaaccaaataaaaagagagccggtgtcattaaactctg  
 Xmv13 cctaccactccctgggttatgtttatggccagtttgagagaaaaaccaaataaaaagagagccggtgtcattaaactctg  
 Xmv15 cctaccactccctgggttatgtttatggccagtttgagagaaaaaccaaataaaaagagagccggtgtcattaaactctg  
 Xmv16 cctaccactccctgggttatgtttatggccagtttgagagaaaaaccaaataGaagGgagccggtgtcattaaactctg  
 Xmv17 cctaccactccctgggttatgtttatggccagtttgagagaaaaaccaaataTaagagagccggtgtcattaaactctg  
 Xmv18 cctaccactccctgggttatgtttatggccagtttgagagaaaaaccaaataTaagagagccggtgtcattaaactctg  
 Xmv19 cctaccactccctgggttatgtttatggccagtttgagagaaaaaccaaataaaaagagagccggtgtcattaaactctg  
 Xmv41 cctaccactccctgggttatgtttatggccagtttgagagaaaaaccaaataaaaagagagccggtgtcattaaactctg  
 Xmv42 cctaccactccctgggttatgtttatggccagtttgagagaaaaaccaaataaaaagagagccggtgtcattaaactctg  
 Xmv43 cctaccactccctgggttatgtttatgAacagtttgagagaaaaaccaaataaaaagagagccggtgtcattaaactctg  
 Xmv8 cctaccactccctgggttatgtttatggccagtttgagagaaaaaccaaataaaaagGgagccggtgtcattaaactctg  
 Xmv9 cctaccactccctgggttatgtGtatggccagtttgagagaaaaaccaaGtatCaaagagagccggtgtcattaaactctg

XMV\_CONS GCCCTGCTGTTGGGAGGACTTACTATGGGCGGCATAGCTGCAGGAGTAGGAACAGGGACTACAGCCCTAGTGGCCACCAA  
 Xmv10 gccctgctgttgggaggacttactatgggcggcatagctgcaggagtaggaacagggactacagccctagtggccaccaa  
 Xmv12 gccctgctgttgggaggacttactatgggcggcatagctgcaggagtaggaacagggactacagccctagtggccaccaa  
 Xmv13 gccctgctgttAggaggacttactatgggcggcatagctgcaggagtaggaacagggactacagccctagtggccaccaa  
 Xmv15 gccctgctgttgggaggacttactatgggcggcatagctgcaggagtaggaacagggactacagccctagtggccaccaa  
 Xmv16 gccctgctgttgggaggacttactatgggcggcatagctgcaggagtaggaacagggactacagccctagtggccaccaa  
 Xmv17 gccctgctgttgggaggacttactatgggcggcatagctgcaggagtaggaacagggactacagccctagtggccaccaa  
 Xmv18 gccctgctgttgggaggacttactatgggcggcatagctgcaggagtaggaacagggactacagccctagtggccaccaa  
 Xmv19 gccctgctgttgggaggacttactatgggcggcatagctgcaggagtaggaacagggactacagccctagtggccaccaa  
 Xmv41 gccctgctgttgggaggacttactatgggcggcatagctgcaggagtagAaacagggactacagccctagtggccaccaa  
 Xmv42 gccctgctgttgggaggacttactatgggcggcatagctgcaggagtaggaacagggactacagccctGgtggccaccaa  
 Xmv43 gccctgctgttgggaggacttactatgggcggcatagctgcaggagtaggaacagggactacagccctagtggccaccaa  
 Xmv8 gccctgctgttgggaggacttactatgggcggcatagctgcaggagtaggaacagggactacagccctagtggccaccaa  
 Xmv9 gccctActgttgggaggacttactatgggcggcatagctgcaggagtaggaacagggactacagccctagtggccaccaa

XMV\_CONS ACAATTCGAGCAGCTCCAGGCAGCCATACATACAGACCTTGGGGCCTTAGAAAAATCAGTCAGTGCCTAGAAAAGTCTC  
 Xmv10 acaattcgagcagctccaggcagccatacatcacagaccttggggccttagaaaaatcagtcagtgccctagaaaaagtctc  
 Xmv12 acaattcgagcagctccaggcagccatacatcacagaccttggggccttagaaaaatcagtcagtgccctagaaaaagtctc  
 Xmv13 acaattcgagcaActccaggcagccatacatcacagaccttggggccttagaaaaatcagtcagtgccctagaaaaagtctc  
 Xmv15 acaattcgagcagctccaggcagccatacatcacagaccttggggccttagaaaaatcagtcagtgccctagaaaaagtctc  
 Xmv16 acaattcgagcagctccaggcagccatacatcacagaccttggggccttagaaaaatcagtcagtgccctagaaaaagtctc  
 Xmv17 acaattcgagcagctccaggcagccatacatcacagaccttggggccttagaaaaatcagtcagtgccctagaaaaagtctc  
 Xmv18 acaattcgagcagctccaggcagccatacatcacagaccttggggccttagaaaaatcagtcagtgccctagaaaaagtctc  
 Xmv19 acaattcgagcagctccaggcagccatacatcacagaccttggggccttagaaaaatcagtcagtgccctagaaaaagtctc  
 Xmv41 acaattcgagcagctccaggcagccatacatcacagaccttggggccttagaaaaatcagtcagtgccctagaaaaagtctc  
 Xmv42 acaattcgagcagctccaggcagccatacatcacagaccttggggccttagaaaaatcagtcagtgccctagaaaaagtctc  
 Xmv43 acaattcgagcagctccaggcagccatacatcacagaccttggggccttagaaaaatcagtcagtgccctagaaaaagtctc  
 Xmv8 acaattcgagcagctccaggcagccatacatcacagaccttggggccttagaaaaatcagtcagtgccctagaaaaagtctc  
 Xmv9 acaattcgagcagctccaggcagccatacatcacagaccttggggccttagaaaaatcagtcagtgccctagaaaaagtctc

XMV\_CONS TGACCTCGTTGTCTGAGGTGGTCTACAGAACCGGAGAGGATTAGATCTGCTGTTCTCTAAAAGAAGGAGGATTATGTGCT  
 Xmv10 tgacctcggtgtgtctgaggtgggtcctacagaacccggagaggattagatctgctgttctctaaaagaGggaggattatgtgct  
 Xmv12 tgacctcggtgtgtctgaggtgggtcctacagaacccggagaggattagatctgctgttctctaaaagaaggaggattatgtgct  
 Xmv13 tgacctcggtgtgtctgaggtgggtcctacagaacccggagaggattagatctgctgttctctaaaagaaggaggattatgtgct  
 Xmv15 tgacctcggtgtgtctgaggtgggtcctacagaacccggagaggattagatctgctgttctctaaaagaaggaggattatgtgct  
 Xmv16 tgacctcggtgtgtctgaggtgggtcctacagaacccggagaggattagatctgctgttctctaaaagaaggaggattatgtgct  
 Xmv17 tgacctcggtgtgtctgaggtgggtcctacagaacccggagaggattagatctgctgttctctaaaagaaggaggattatgtgct  
 Xmv18 tgacctcggtgtgtctgaggtgggtcctacagaacccggagaggattagatctgctgttctctaaaagaaggaggattatgtgct  
 Xmv19 tgacctcggtgtgtctgaggtgggtcctacagaacccggagaggattagatctgctgttctctaaaagaaggaggattatgtgct  
 Xmv41 tgacctcggtgtgtctgaAgtgggtcctacagaacccggagaggattagatctgctgttctctaaaagaaggaggattatgtgct  
 Xmv42 tgacctcggtgtgtctgaggtgggtcctacagaacccggagaggattagatctgctgttctctaaaagaaggaggattatgtgct  
 Xmv43 tgacctcggtgtgtctgaggtgggtcctacagaacccggagaggattagatctgctgttctctaaaagaaggaggattatgtgct  
 Xmv8 tgacctcggtgtgtctgaggtgggtcctacagaacccggagaggattagatctgctgttctctaaaagaaggaggattatgtgct  
 Xmv9 tgacctcggtgtgtctgaAgtgggtcctacagaacccggagaggattagatctgctgttctctaaaagaaggaggattatgtgct

XMV\_CONS GCCCTAAAAGAAGAATGCTGTTTCTACGCGGACCACACTGGCGTAGTAAGGGATAGCATGGCTAAGCTAAGAGAAAAGGCT  
 Xmv10 gccctaaaagaagaatgctgtttctacgcggaaccacactggcgtagtaagggatagcatggctaagctaagagaGagAct  
 Xmv12 gccctaaaagaagaatgctgtttctacgcggaaccacactggcgtagtGagAagatagcatggcAaagctaagagaaaaggTt  
 Xmv13 gccctaaaagaagaatgctgtttctacgcggaaccacactggcgtagtaagggatagcatggctaagctaagagaGagAct  
 Xmv15 gccctaaaagaagaatgctgtttctacgcggaaccacactggcgtagtGagAagatagcatggcAaagctaagagaaaaggTt  
 Xmv16 gccctaaaagaagaatgctgtttctacgcggaaccacactggcgtagtaagggatagcatggctaagctaagagaGagAct  
 Xmv17 gccctaaaagaagaatgctgtttctacgcggaaccacactggcgtagtaagAagatagcatggcAaagctaagagaaaaggTt  
 Xmv18 gccctaaaagaagaatgctgtttctacgcggaaccacactggcgtagtGagAagatagcatggcAaagctaagagaaaaggTt  
 Xmv19 gccctaaaagaagaatgctgtttctacgcggaaccacactggcgtagtGagAagatagcatggcAaagctaagagaaaaggTt  
 Xmv41 gccctaaaagaagaatgctgtttctacgcggaaccacactggcgtagtaagggatagcatggctaagctGagagaaaaggct  
 Xmv42 gccctaaaagaagaatgctgtttctacgcggaaccacactggcgtagtGagAagatagcatggcAaagctGagagaaaaggTt  
 Xmv43 gccctaaaagaagaatgctgtttctacgcggaaccacactggcgtagtaagggatagcatggctaagctaagagaaaaggct  
 Xmv8 gccctaaaagaagaatgctgtttctacgcggaaccacactggcgtagtaagggatagcatggctaagctaagagaGagAct  
 Xmv9 gccctaaaagaagaatgctgtttctacgcggaaccacactggcgtagtaagggatagcatggctaagctaagagaGagAct

XMV\_CONS AAACCAGAGACAAAAATGTTCGAATCAGGACAAGGGTGGTTTGAGGGACTGTTTAAACAGGTCCCATGGTTCACGACCC  
 Xmv10 aaaccagagacaaaaatgttctgaatcaggacaaggggtgggttgagggactgtttaacaggtcccatggttcacgaccc  
 Xmv12 aaaccagagacaaaaatgttctgaatcaggacaaggggtgggttgagggactgtttaacaggtcccatggttcacgaccT  
 Xmv13 aaaccagagacaaaaatgttctgaatcaggacaaggggtgggttgagggactgtttaacaggtcccatggttcacgaccc  
 Xmv15 aaaccagagacaaaaatgttctgaatcaggacaaggggtgggttgagggactgtttaacaggtcccatggttcacgaccT  
 Xmv16 aaaccagagacaaaaatgttctgaatcaggacaaggggtgggttgagggactgtttaacaggtcccatggttcacgaccc  
 Xmv17 aaaccagagacaaaaatgttctgaatcaggacaaggggtgggttgagggactgtttaacaggtcccatggttcacgaccT  
 Xmv18 aaaccagagacaaaaatgttctgaatcaggacaaggggtgggttgagggactgtttaacaggtcccatggttcacgaccT  
 Xmv19 aaaccagagacaaaaatgttctgaatcaggacaaggggtgggttgagggactgtttaacaggtcccatggttcacgaccT  
 Xmv41 aaaccagagacaaaaatgttctgaatcaggacaaggggtgggttgagggactgtttaacaggtcccatggttcacgaccc  
 Xmv42 aaaccagagacaaaaatgttctgaatcaggacaaggggtgggtCgagggactgtttaacaggtcccatggttcacgaccT  
 Xmv43 aaaccagagGcaaaaaatgttctgaatcaggacaaggggtgggttgagggactgtttaacaggtcccatggttcacgaccc  
 Xmv8 aaaccagagacaaaaatgttctgaatcaggacaaggggtgggttgagggactgtttaacaggtcccatggttcacgaccc  
 Xmv9 aaaccagagacaaaaatgttctgaatcaggacaaggggtgggttgagggactgtttaacaggtcccatggttcacgaccT

XMV\_CONS TGATATCCACCATTATGGGCCCBCTGATAGTACTTTTATTAATCCTACTCCTCGGACCCTGTATTCTCAACCGCTTGGTC  
 Xmv10 tgatatccaccattatggggcccTctgatagtacttttattaatcctactcTtcggaccctgtatttctcaaccgcttggtc  
 Xmv12 tgatatccaccattatggggcccCTtgataAacttttattaatcctactcctcggaccctgtatttctcaaccgcttggtc  
 Xmv13 tgaCatccaccattatggggcccTctgatagtacttttattaatcctactcTtcggaccctgtatttctcaaccgcttggtc  
 Xmv15 tgatatccaccattatggggcccCTtgataAacttttattaatcctactcctcggaccctgtatttctcaaccgcttggtc  
 Xmv16 tgatatccaccattatggggcccTctgatagtacttttattaatcctactcTtcggaccctgtatttctcaaccgcttggtc  
 Xmv17 tAatatccaccattatggggcccCTtgataAacttttattaatcctactcctcggaccctgtatttctcaaccgcttggtc  
 Xmv18 tgatatccaccattatggggcccCTtgataAacttttattaatcctactcctcggaccctgtatttctcaaccgcttggtc  
 Xmv19 tgatatccaccattatggggcccCTtgataAacttttattaatcctactcctcggaccctgtatttctcaaccgcttggtc  
 Xmv41 tgatatccaccattatggggcccTctgatagtacttttattaatcctactcctcggaccctgCatttctcaaccgcttggtc  
 Xmv42 tgatatccaccattatggggcccCTtgataAacttttattaatcctactcTtcggaccctgtatttctcaaccgcttggtc  
 Xmv43 tgatatccaccattatggggcccTctgatagtacttttattaatcctactcctcggaccctgCatttctcaaccgcttggtc  
 Xmv8 tgatatccaccattatggggcccTctgatagtacttttattaatcctactcTtcggaccctgtatttctcaaccgcttggtc  
 Xmv9 tgatatccaccattatggggcccCTtgataAacttttattaatcctactcctcggaccctgtatttctcaaccgAattggtc

|          |                                |
|----------|--------------------------------|
| XMV_CONS | CAGTTTGTAAGACAGAATTCGGTGGTG    |
| Xmv10    | cagtttgtaaaagacagaatttcggtggtg |
| Xmv12    | cagtttgtaaaagacagaatttcggtggtg |
| Xmv13    | cagtttgtaaaagacagaatttcggtggtg |
| Xmv15    | cagtttgtaaaagacagaatttcggtggtg |
| Xmv16    | cagtttgtaaaagacagaatttcggtggtg |
| Xmv17    | cagtttgtaaaagacagaatttcggtggtg |
| Xmv18    | cagtttgtaaaagacagaatttcggtggtg |
| Xmv19    | cagtttgtaaaagacagaatttcggtggtg |
| Xmv41    | cagtttgtaaaagacagaatttcggtggtg |
| Xmv42    | cagtttgtaaaagacagaatttcggtggtg |
| Xmv43    | cagtttgtaaaagacagaatttcggtggtg |
| Xmv8     | cagtttgtaaaagacagaatttcggtggtg |
| Xmv9     | cagtttgtaaaagacagaatttcggtggtg |
