# Supplementary material for: Role of APOBEC3 in Genetic Diversity among Endogenous Murine Leukemia Viruses
Source: PubMed Central journal article supplement (PMC2041998; doi:10.1371/journal.pgen.0030183), 2007-10-26
Supplement: pgen.0030183.sg002.pdf [file pgen.0030183.sg002.pdf]

Figure S2

Proviral junctions and target duplications (TSDs) from <http://genome.ucsc.edu/>  
 Mouse genome (mm8, freeze date Feb. 2006)

| <b>Locus</b> | <b>5'TSD</b>                                                                 | <b>3'TSD</b> |
|--------------|------------------------------------------------------------------------------|--------------|
| Pmv1         | AACACT <b>ATAC</b> TGAAAGACCCACCA---//---GTCGGGGGTCTTTCA <b>ATAC</b> CTACCC  |              |
| Pmv10        | GGTGGG <b>AGGT</b> TGAAAGACCCACCA---//---GTCGGGGGTCTTTCA <b>AGGT</b> GAGCCC  |              |
| Pmv11        | GTTCCA <b>CACC</b> TGAAAGACCCACCA---//---GTCGGGGGTCTTTCA <b>CACC</b> AACGGC  |              |
| Pmv12        | AATACC <b>AGGG</b> TGAAAGACCCACCA---//---GTCGGGGGTCTTTCA <b>AGGG</b> TTAACT  |              |
| Pmv13        | GAGAAG <b>GATG</b> TGAAAGACCCACCA---//---GTCGGGGGTCTTTCA <b>GATG</b> AAGCCA  |              |
| Pmv14        | ATTGTT <b>CTGG</b> TGAAAGACCCACCA---//---GTCGGGGGTCTTTCA <b>CTGG</b> AAGACA  |              |
| Pmv15        | AAAAAC <b>CATG</b> TGAAAGACCCACCA---//---GTCGGGGGTCTTTCA <b>CATG</b> TTCTGG  |              |
| Pmv16        | AAGGGT <b>GCCT</b> TGAAAGACCCACCA---//---GTCGGGGGTCTTTCA <b>GCCT</b> TACAAC  |              |
| Pmv17        | ACAAAC <b>AAAC</b> TGAAAGACCCACCA---//---GTCGGGGGTCTTTCA <b>AAAC</b> AAACAA  |              |
| Pmv18        | GTATTA <b>ATTT</b> TGAAAGACCCACCA---//---CTCGGGGTCTTTCA <b>ATTT</b> CTTACA   |              |
| Pmv19        | CTGGAA <b>AAAC</b> TGAAAGACCCACCA---//---GTCGGGGGTCTTTCA <b>AAAC</b> AAACAA  |              |
| Pmv2         | TAAATG <b>GTTT</b> TGAAAGACCCACCA---//---GTCGGGGGTCTTTCA <b>GTTT</b> ATGATT  |              |
| Pmv20        | AGCCTA <b>CCTG</b> TGAAAGACCCACCA---//---GTCGGGGGTCTTTCA <b>CCTG</b> GTCTAC  |              |
| Pmv21        | CAGGAT <b>GTTG</b> TGAAAGACCCACCA---//---GTCGGGGGTCTTTCA <b>GTTG</b> CAGAAC  |              |
| Pmv22        | TTATTT <b>ATAG</b> TGAAAGACCCACCA---//---CTCGGGGTCTTTCA <b>ATAG</b> TTTTTA   |              |
| Pmv23        | TGTTTA <b>CACC</b> TGAAAGACCCACCA---//---GTCGGGGGTCTTTCA <b>CACC</b> CATGTC  |              |
| Pmv24        | CACTAG <b>TTTG</b> TGAAAGACCCACCA---//---GTCGGGGGTCTTTCA <b>TTTG</b> TTCAAC  |              |
| Pmv4         | AAAATT <b>ATGA</b> TGAAAGACCCACCA---//---GTCGGGGGTCTTTCA <b>ATGA</b> TAGATC  |              |
| Pmv5         | GCACAG <b>CCAC</b> TGAAAGACCCACCA---//---GTCGGGGGTCTTTCA <b>CCAC</b> CACAAT  |              |
| Pmv6         | ATCTCA <b>TGAAT</b> TGAAAGACCCACCA---//---CTCGGGGTCTTTCA <b>GAGT</b> ATGCCT  |              |
| Pmv7         | GTGGTG <b>GTGT</b> TGAAAGACCCACCA---//---GTCGGGGGTCTTTCA <b>GGTG</b> AAGGCT  |              |
| Pmv8         | CATGCT <b>GTAC</b> TGAAAGACCCACCA---//---GTCGGGGGTCTTTCA <b>GATC</b> CAATGA  |              |
| Pmv9         | GTCTTA <b>GTGG</b> TGAAAGACCCACCA---//---GTCGGGGGTCTTTCA <b>GTTG</b> GAGGAA  |              |
| Mpmv1        | GGCATC <b>CCTG</b> TGAAAGACCCACCA---//---CTGGGGGTCTTTCA <b>CCTG</b> CCTGAC   |              |
| Mpmv10       | TTTATC <b>ACTT</b> TGAAAGACCCACCA---//---CTGGGGGTCTTTCA <b>ACTT</b> TCAGTT   |              |
| Mpmv11       | CTCTGT <b>AGAC</b> TGAAAGACCCACCA---//---CAGGGGGGTCTTTCA <b>AGAC</b> CAGGCT  |              |
| Mpmv12       | TTATTT <b>CTGC</b> TGAAAGACCCACCA---//---GGGGGGGTCTTTCA <b>ATTG</b> CAGTGG   |              |
| Mpmv13       | TCACGA <b>ATAC</b> TGAAAGACCCACCA---//---CTGGGGGTCTTTCA <b>ATAC</b> TAGCGG   |              |
| Mpmv2        | CAAGTC <b>AGGG</b> TGAAAGACCCACCA---//---GGGGGGGTCTTTCA <b>ATTG</b> AACATT   |              |
| Mpmv3        | CTAAAC <b>ATTG</b> TGAAAGACCCACCA---//---CTGGGGGTCTTTCA <b>ATTG</b> TTTTTA   |              |
| Mpmv4        | GCACAC <b>ACAC</b> TGAAAGACCCACCA---//---CTGGGGGTCTTTCA <b>ACAC</b> TCCACC   |              |
| Mpmv5        | TGGATC <b>ACAG</b> TGAAAGACCCACCA---//---CTGGGGGTCTTTCA <b>ATTG</b> GGCCCC   |              |
| Mpmv6        | TGGGCA <b>ACAC</b> TGAAAGACCCACCA---//---GGGGGGGTCTTTCA <b>ACAC</b> TATCCC   |              |
| Mpmv7        | ATGTAT <b>ATATT</b> TGAAAGACCCACCA---//---CTGGGGGTCTTTCA <b>ATTG</b> GTGTGT  |              |
| Mpmv8        | CTAAG <b>GAAAC</b> TGAAAGACCCACCA---//---CTGGGGGTCTTTCA <b>GAAAC</b> AAAAA   |              |
| Mpmv9        | CTGTT <b>ATGT</b> TGAAAGACCCACCA---//---TGGGGGGGTCTTTCA <b>ATGT</b> CTCCTG   |              |
| Xmv10        | TGAGTT <b>CCAG</b> TGAAAGACCCACCA---//---CTCGGGGTCTTTCA <b>CCAG</b> GACAGC   |              |
| Xmv12        | CAGCCT <b>GGTC</b> TGAAAGACCCACCA---//---CTCGGGGTCTTTCA <b>GATC</b> TACAGAG  |              |
| Xmv13        | TAAGAT <b>GTAC</b> TGAAAGACCCACCA---//---CTCGGGGTCTTTCA <b>GATC</b> ACTATA   |              |
| Xmv15        | GAGCTG <b>CTGG</b> TGAAAGACCCACCA---//---CTCGGGGTCTTTCA <b>CTGG</b> AGTCTC   |              |
| Xmv16        | GGGGTT <b>GGAAT</b> TGAAAGACCCACCA---//---CTCGGAGGTCTTTCA <b>GGGG</b> GTGGGG |              |
| Xmv17        | GTTGTAT <b>TTAAT</b> TGAAAGACCCACCA---//---CTCGGGGTCTTTCA <b>ATTG</b> TCAGGG |              |
| Xmv18        | AGTCTT <b>CTTG</b> TGAAAGACCCACCA---//---CTCGGGGTCTTTCA <b>CTTG</b> CTAGTA   |              |
| Xmv19        | GAGAAA <b>GTAT</b> TGAAAGACCCACCA---//---CTCGGGGTCTTTCA <b>GATC</b> GTCTCT   |              |
| Xmv41        | GCAGTG <b>GTGA</b> TGAAAGACCCACCA---//---CTCGGGGTCTTTCA <b>GATC</b> CACATG   |              |
| Xmv42        | GAGGCA <b>GGAG</b> TGAAAGACCCACCA---//---GTCGGGGGTCTTTCA <b>GAGG</b> GAGGCT  |              |
| Xmv43        | TTCATA <b>AACC</b> TGAAAGACCCACCA---//---CTCGGGGTCTTTCA <b>AACC</b> TATCCT   |              |
| Xmv8         | GGTCAC <b>ATGC</b> TGAAAGACCCACCA---//---CTCGGGGTCTTTCA <b>ATGC</b> TACAGG   |              |
| Xmv9         | AGGGTA <b>TTGG</b> TGAAAGACCCACCA---//---CTCGGGGTCTTTCA <b>ATTG</b> TATTCA   |              |
