# Supplementary material for: Role of APOBEC3 in Genetic Diversity among Endogenous Murine Leukemia Viruses
Source: PubMed Central journal article supplement (PMC2041998; doi:10.1371/journal.pgen.0030183), 2007-10-26
Supplement: pgen.0030183.sg006.pdf [file pgen.0030183.sg006.pdf]

Pmv4 excluded

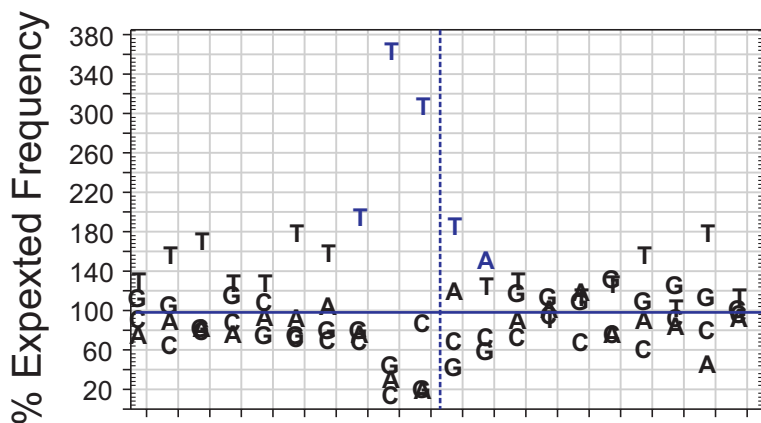

Mpmv5 excluded

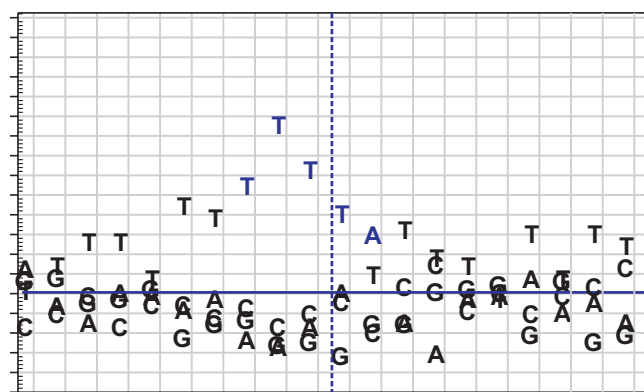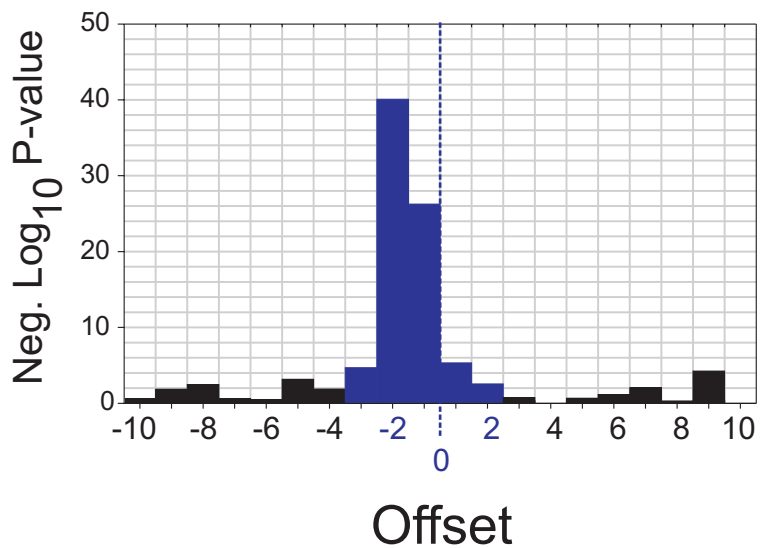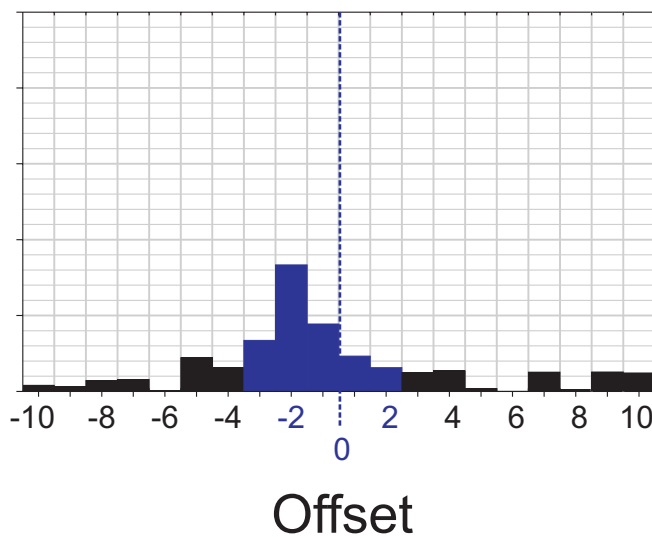

Figure S6
