# Supplementary material for: Role of APOBEC3 in Genetic Diversity among Endogenous Murine Leukemia Viruses
Source: PubMed Central journal article supplement (PMC2041998; doi:10.1371/journal.pgen.0030183), 2007-10-26
Supplement: pgen.0030183.st001.pdf [file pgen.0030183.st001.pdf]

**Table S1. Noncotropic endogenous MLVs**

| Locus  | Syn. name | BLAT mouse (freeze Feb. 2006) |           |             |        | LTR lengths |       |      |       | LTR diff.       |                   | Gag <sup>a</sup> |                   | Pol <sup>a</sup> |                   | Env <sup>a</sup> |   | ORFs |
|--------|-----------|-------------------------------|-----------|-------------|--------|-------------|-------|------|-------|-----------------|-------------------|------------------|-------------------|------------------|-------------------|------------------|---|------|
|        |           | Chr.                          | Start     | Orientation | Length | 5'LTR       | 3'LTR | (%)  | PBS   | stops           | f.s. <sup>b</sup> | stops            | f.s. <sup>b</sup> | stops            | f.s. <sup>b</sup> |                  |   |      |
| Pmv1   | Xa        | chrX                          | 14631006  | plus        | 8981   | 697         | 697   | 0    | Gln2  | 0               | 0                 | 1                | 0                 | 0                | 0                 | 0                |   |      |
| Pmv10  |           | chr8                          | 122775542 | minus       | 7476   | 697         | 697   | 0    | Gln1  | 0               | 0                 | 0                | 0                 | 0                | 0                 | 0                | X |      |
| Pmv11  | 5c        | chr5                          | 78005290  | plus        | 8982   | 697         | 697   | 0    | Gln2  | 0               | 0                 | 0                | 0                 | 0                | 0                 | 0                | X |      |
| Pmv12  | 5b        | chr5                          | 144923365 | plus        | 8981   | 697         | 697   | 0    | Gln1  | 1               | 0                 | 0                | 0                 | 0                | 0                 | 0                |   |      |
| Pmv13  |           | chr10                         | 41125063  | plus        | 8981   | 697         | 697   | 0    | Gln2  | 0               | 0                 | 0                | 0                 | 0                | 0                 | 0                | X |      |
| Pmv14  | 16b       | chr16                         | 76026704  | minus       | 8982   | 697         | 697   | 0    | Gln1  | 0               | 0                 | 1                | 0                 | 1                | 0                 | 0                |   |      |
| Pmv15  | 7a        | chr7                          | 30397399  | plus        | 8981   | 697         | 697   | 0    | Gln1  | 0               | 0                 | 1                | 0                 | 0                | 0                 | 0                |   |      |
| Pmv16  | 16a       | chr16                         | 93594977  | minus       | 8981   | 697         | 697   | 0    | Gln2  | 1               | 0                 | 0                | 0                 | 0                | 0                 | 0                |   |      |
| Pmv17  | 15a       | chr15                         | 76394257  | minus       | 7186   | 697         | 697   | 0    | Gln1  | 0               | 0                 | nd <sup>c</sup>  | nd <sup>c</sup>   | 0                | 0                 | 0                |   |      |
| Pmv18  | 7b        | chr7                          | 29323966  | plus        | 8699   | 697         | 697   | 0    | Gln1  | 0               | 0                 | 0                | 0                 | 0                | 0                 | 0                | X |      |
| Pmv19  | 4b        | chr4                          | 107652948 | minus       | 8983   | 698         | 698   | 0.14 | Gln1  | 0               | 0                 | 0                | 0                 | 0                | 0                 | 0                | X |      |
| Pmv2   | 11a       | chr11                         | 6658394   | minus       | 8970   | 697         | 697   | 0    | Gln1  | 0               | 0                 | 1                | 1                 | 0                | 0                 | 0                |   |      |
| Pmv20  | 18a       | chr18                         | 82827978  | plus        | 8880   | 697         | 697   | 0    | Gln2  | 0               | 1                 | 0                | 0                 | 0                | 0                 | 0                |   |      |
| Pmv21  | 1b        | chr1                          | 193634227 | plus        | 8981   | 697         | 697   | 0    | Gln2  | 0               | 0                 | 2                | 0                 | 1                | 0                 | 0                |   |      |
| Pmv22  | 11b       | chr11                         | 8820300   | plus        | 8980   | 697         | 697   | 0    | Gln1  | 0               | 0                 | 0                | 0                 | 0                | 0                 | 0                | X |      |
| Pmv23  | 4a        | chr4                          | 101370070 | minus       | 8982   | 697         | 697   | 0.14 | Gln2  | 0               | 0                 | 1                | 0                 | 0                | 0                 | 0                |   |      |
| Pmv24  | 1a        | chr1                          | 184093794 | plus        | 8981   | 697         | 697   | 0    | Gln2  | 0               | 0                 | 1                | 0                 | 0                | 0                 | 0                |   |      |
| Pmv4   | 7c        | chr7                          | 6682978   | minus       | 8982   | 697         | 697   | 0.29 | Gln2  | 0               | 1                 | 7                | 0                 | 5                | 0                 | 0                |   |      |
| Pmv5   | 5a        | chr5                          | 44422607  | plus        | 8982   | 697         | 697   | 0    | Gln2  | 0               | 1                 | 0                | 0                 | 0                | 0                 | 0                |   |      |
| Pmv6   | Xb        | chrX                          | 51501606  | plus        | 8981   | 697         | 697   | 0    | Gln2  | 0               | 0                 | 0                | 0                 | 0                | 0                 | 0                | X |      |
| Pmv7   | 2a        | chr2                          | 57038778  | minus       | 8981   | 697         | 697   | 0    | Gln1  | 0               | 0                 | 0                | 0                 | 0                | 0                 | 0                | X |      |
| Pmv8   | 10a       | chr10                         | 50115990  | minus       | 8027   | 682         | 683   | 0.15 | Gln1  | 0               | 0                 | 1                | 1                 | 1                | 0                 | 0                |   |      |
| Pmv9   | 13a       | chr13                         | 100095412 | minus       | 8981   | 697         | 697   | 0    | Gln2  | 0               | 0                 | 1                | 0                 | 0                | 0                 | 0                |   |      |
| Mpmv1  | 7a        | chr7                          | 64005511  | plus        | 9041   | 741         | 741   | 0    | Thr   | 0               | 0                 | 0                | 0                 | 0                | 0                 | 0                | X |      |
| Mpmv10 | 3a        | chr3                          | 67184006  | plus        | 7717   | 742         | 742   | 0    | Thr   | 0               | 0                 | 1                | 1                 | 0                | 1                 | 0                |   |      |
| Mpmv11 | 12a       | chr12                         | 70465410  | plus        | 9041   | 741         | 741   | 0    | Gln1  | 1               | 0                 | 0                | 0                 | 0                | 0                 | 0                |   |      |
| Mpmv12 | 10b       | chr10                         | 22423693  | plus        | 9045   | 743         | 743   | 0    | Gln2  | 0               | 0                 | 0                | 0                 | 0                | 0                 | 0                | X |      |
| Mpmv13 | 5a        | chr5                          | 24740763  | plus        | 8972   | 741         | 741   | 0    | Gln2  | 0               | 0                 | 1                | 0                 | 0                | 0                 | 0                |   |      |
| Mpmv2  | 11c       | chr11                         | 76365002  | plus        | 9045   | 743         | 743   | 0    | Gln1  | 0               | 0                 | 0                | 0                 | 0                | 0                 | 0                | X |      |
| Mpmv3  | 2a        | chr2                          | 15947290  | minus       | 9042   | 741         | 741   | 0    | Gln2  | 0               | 1                 | 0                | 0                 | 0                | 0                 | 0                |   |      |
| Mpmv4  | 11b       | chr11                         | 86698510  | plus        | 9041   | 741         | 741   | 0    | Gln2  | 0               | 0                 | 0                | 0                 | 0                | 0                 | 0                | X |      |
| Mpmv5  | 10a       | chr10                         | 4628826   | minus       | 9039   | 741         | 741   | 0.54 | Gln2  | 0               | 1                 | 3                | 0                 | 2                | 0                 | 0                |   |      |
| Mpmv6  | 1a        | chr1                          | 133470112 | plus        | 9054   | 748         | 746   | 0.27 | Gln1  | 1               | 0                 | 0                | 0                 | 0                | 0                 | 0                |   |      |
| Mpmv7  | 5b        | chr5                          | 43496188  | plus        | 9041   | 741         | 741   | 0.13 | Gln2  | 0               | 0                 | 0                | 0                 | 0                | 0                 | 0                | X |      |
| Mpmv8  | 11a       | chr11                         | 102899752 | plus        | 9042   | 741         | 741   | 0.13 | Gln1  | 1               | 0                 | 1                | 0                 | 0                | 0                 | 0                |   |      |
| Mpmv9  | 3b        | chr3                          | 152260525 | plus        | 9043   | 742         | 742   | 0    | Gln1  | 0               | 0                 | 0                | 0                 | 0                | 0                 | 0                | X |      |
| Xmv10  | 2a        | chr2                          | 156055046 | minus       | 7050   | 502         | 502   | 0    | Gln1  | 0               | 0                 | nd <sup>c</sup>  | nd <sup>c</sup>   | 0                | 0                 | 0                |   |      |
| Xmv12  | 8a        | chr8                          | 44819280  | minus       | 8734   | 573         | 573   | 0.17 | Gln1  | 0               | 0                 | 0                | 0                 | 0                | 0                 | 0                | X |      |
| Xmv13  | 13a       | chr13                         | 68392677  | minus       | 8687   | 547         | 547   | 0    | Gln2  | 0               | 0                 | 0                | 0                 | 0                | 0                 | 0                | X |      |
| Xmv15  | 9a        | chr9                          | 62237179  | plus        | 8759   | 574         | 613   | 6.36 | Gln2  | 0               | 0                 | 0                | 0                 | 0                | 0                 | 0                | X |      |
| Xmv16  | 9b        | chr9                          | 41663263  | minus       | 6784   | 574         | 574   | 0    | (Thr) | nd <sup>c</sup> | nd <sup>c</sup>   | 0                | 0                 | 0                | 0                 | 0                |   |      |
| Xmv17  | 5a        | chr5                          | 23725372  | plus        | 6846   | 535         | 535   | 0    | Gln1  | 0               | 0                 | nd <sup>c</sup>  | nd <sup>c</sup>   | 0                | 0                 | 0                |   |      |
| Xmv18  | 19a       | chr19                         | 60988696  | minus       | 8727   | 574         | 574   | 0    | Gln1  | 0               | 0                 | 0                | 0                 | 0                | 0                 | 0                | X |      |
| Xmv19  | 14a       | chr14                         | 53484569  | plus        | 7824   | 574         | 574   | 0.17 | Gln1  | nd <sup>c</sup> | nd <sup>c</sup>   | 0                | 0                 | 0                | 0                 | 0                |   |      |
| Xmv41  | 1a        | chr1                          | 173317820 | plus        | 8670   | 531         | 531   | 0    | Pro   | 0               | 0                 | 2                | 0                 | 0                | 0                 | 0                |   |      |
| Xmv42  | 11a       | chr11                         | 88713056  | minus       | 6787   | 697         | 697   | 0    | Gln2  | 0               | 0                 | nd <sup>c</sup>  | nd <sup>c</sup>   | 0                | 0                 | 0                |   |      |
| Xmv43  | 1b        | chr1                          | 172778195 | plus        | 8657   | 525         | 525   | 0    | Pro   | 0               | 0                 | 0                | 0                 | 0                | 0                 | 0                | X |      |
| Xmv8   | 4b        | chr4                          | 145371740 | minus       | 8759   | 588         | 588   | 0    | Gln1  | 0               | 0                 | 0                | 0                 | 0                | 0                 | 0                | X |      |
| Xmv9   | 4a        | chr4                          | 146062627 | plus        | 8722   | 576         | 576   | 0    | Gln2  | 0               | 0                 | 0                | 0                 | 0                | 0                 | 0                | X |      |

<sup>a</sup> Automated predictions using RetroTector Program (Sperber G.O., Airola T., Jern P. And J. Blomberg. *Nucleic Acids Res. In press 2007*)

<sup>b</sup> f.s. Frame shifts

<sup>c</sup> Not determined (complicated by deletions.)
