# Supplementary material for: Role of APOBEC3 in Genetic Diversity among Endogenous Murine Leukemia Viruses
Source: PLoS Genet. 2007 Oct 26;3(10):e183. doi: 10.1371/journal.pgen.0030183 (PMC2041998; doi:10.1371/journal.pgen.0030183)
Supplement: Table S2 — (7 KB PDF) [file pgen.0030183.st002.pdf]

**Table S2. PBS types in Nonecotropic**

| Provirus          | PBS-type    | Sequence                  |
|-------------------|-------------|---------------------------|
| <b>Gln1</b>       | <b>Gln1</b> | <b>TGGAGGTTCCACCGAGAT</b> |
| Mpmv11            | Gln1        | TGGAGGTTCCACCGAGAT        |
| Mpmv2             | Gln1        | TGGAGGTTCCACCGAGAT        |
| Mpmv6             | Gln1        | TGGAGGTTCCACCGAGAT        |
| Mpmv8             | Gln1        | TGGAGGTTCCACCGAGAT        |
| Mpmv9             | Gln1        | TGGAGGTTCCACCGAGAT        |
| Pmv10             | Gln1        | TGGAGGTTCCACCGAGAT        |
| Pmv12             | Gln1        | TGGAGGTTCCACCGAGAT        |
| Pmv14             | Gln1        | TGGAGGTTCCACCGAGAT        |
| Pmv15             | Gln1        | TGGAGGTTCCACCGAGAT        |
| Pmv17             | Gln1        | TGGAGGTTCCACCGAGAT        |
| Pmv18             | Gln1        | TGGAGGTTCCACCGAGAT        |
| Pmv19             | Gln1        | TGGAGGTTCCACCGAGAT        |
| Pmv2              | Gln1        | TGGAGGTTCCACCGAGAT        |
| Pmv22             | Gln1        | TGGAGGTTCCACCGAGAT        |
| Pmv7              | Gln1        | TGGAGGTTCCACCGAGAT        |
| Pmv8              | Gln1        | TGGAGGTTCCACCGAGAT        |
| Xmv10             | Gln1        | TGGAGGTTCCACCGAGAT        |
| Xmv12             | Gln1        | TGGAGGTTCCACCGAGAT        |
| Xmv17             | Gln1        | TGGAGGTTCCACCGAGAT        |
| Xmv18             | Gln1        | TGGAGGTTCCACCGAGAT        |
| Xmv19             | Gln1        | TGGAGGTTCCACCGAGAT        |
| Xmv8              | Gln1        | TGGAGGTTCCACCGAGAT        |
| <b>Gln2</b>       | <b>Gln2</b> | <b>TGGAGGTCCCACCGAGAT</b> |
| Mpmv12            | Gln2        | TGGAGGTCCCACCGAGAT        |
| Mpmv13            | Gln2        | TGGAGGTCCCACCGAGAT        |
| Mpmv3             | Gln2        | TGGAGGTCCCACCGAGAT        |
| Mpmv4             | Gln2        | TGGAGGTCCCACCGAGAT        |
| Mpmv5             | Gln2        | TGGAGGTCCCACCGAGAT        |
| Mpmv7             | Gln2        | TGGAGGTCCCACCGAGAT        |
| Pmv1              | Gln2        | TGGAGGTCCCACCGAGAT        |
| Pmv11             | Gln2        | TGGAGGTCCCACCGAGAT        |
| Pmv13             | Gln2        | TGGAGGTCCCACCGAGAT        |
| Pmv16             | Gln2        | TGGAGGTCCCACCGAGAT        |
| Pmv20             | Gln2        | TGGAGGTCCCACCGAGAT        |
| Pmv21             | Gln2        | TGGAGGTCCCACCGAGAT        |
| Pmv23             | Gln2        | TGGAGGTCCCACCGAGAT        |
| Pmv24             | Gln2        | TGGAGGTCCCACCGAGAT        |
| Pmv4              | Gln2        | TGGAGGTCCCACCGAGAT        |
| Pmv5              | Gln2        | TGGAGGTCCCACCGAGAT        |
| Pmv6              | Gln2        | TGGAGGTCCCACCGAGAT        |
| Pmv9              | Gln2        | TGGAGGTCCCACCGAGAT        |
| Xmv13             | Gln2        | TGGAGGTCCCACCGAGAT        |
| Xmv15             | Gln2        | TGGAGGTCCCACCGAGAT        |
| Xmv42             | Gln2        | TGGAGGTCCCACCGAGAT        |
| Xmv9              | Gln2        | TGGAGGTCCCACCGAGAT        |
| <b>Pro1&amp;2</b> | <b>Pro</b>  | <b>TGGGGGCTCGTCCGGGAT</b> |
| Xmv41             | Pro         | TGGGGGCTCGTCCGGGAT        |
| Xmv43             | Pro         | TGGGGGCTCGTCCGGGAT        |
| HuXmv             | Pro         | TGGGGGCTCGTCCGGGAT        |
| MLV_Eco           | Pro         | TGGGGGCTCGTCCGGGAT        |
| MoMLV             | Pro         | TGGGGGCTCGTCCGGGAT        |
| <b>Thr</b>        | <b>Thr</b>  | <b>TGGAGGCCCCAGCGAGAT</b> |
| Mpmv1             | Thr         | TGGAGGCCCCAGCGAGAT        |
| Mpmv10            | Thr         | TGGAGGCCCCAGCGAGAT        |
| Xmv16             | Thr         | TGGAGGCCCCAGCGAGAT        |
